# 1 Pilot study: Trehalose-induced remodelling of the human microbiota 2 affects *Clostridioides difficile* infection outcome in an *in vitro* colonic 3 model

4 Anthony M. Buckley<sup>1\*</sup>, Ines B. Moura<sup>1</sup>, Norie Arai<sup>2</sup>, William Spittal<sup>1</sup>, Emma Clark<sup>1</sup>,  
5 Yoshihiro Nishida<sup>2</sup>, Hannah C. Harris<sup>1</sup>, Karen Bentley<sup>1</sup>, Georgina Davis<sup>1</sup>, Dapeng Wang<sup>3</sup>,  
6 Suparna Mitra<sup>1</sup>, Takanobu Higashiyama<sup>2</sup> and Mark H. Wilcox<sup>1\*</sup>

7 <sup>1</sup>Healthcare Associated Infection Research Group, Molecular Gastroenterology, Leeds  
8 Institute of Medical Research, University of Leeds, Leeds. U.K. LS1 3EX

9 <sup>2</sup>R&D Division, Hayashibara Co. Ltd./NAGASE Group, 675-1 Fujisaki, Naka-ku, Okayama  
10 702-8006, Japan

11 <sup>3</sup>LeedsOmics, University of Leeds, Leeds. U.K. LS2 9JT

12 \*Corresponding authors: Prof. Mark H. Wilcox, Email: [mark.wilcox@nhs.net](mailto:mark.wilcox@nhs.net), Tel: +44 113  
13 392 6125; Dr Anthony Buckley, Email: [A.Buckley1@Leeds.ac.uk](mailto:A.Buckley1@Leeds.ac.uk), Tel: +44 113 392 8663,  
14 Healthcare Associated Infection Research Group, Molecular Gastroenterology, Institute for  
15 Medical Research, University of Leeds, Leeds. U.K. LS1 3EX

16 Running title: Effect of sugars on the microbiota

17 Key words: *Clostridium difficile*, trehalose, human microbiota, microbial competition, *in*  
18 *vitro* gut model

19

# 1 Abstract

2 Within the human intestinal tract, dietary, microbial- and host-derived compounds are used as  
 3 signals by many pathogenic organisms, including *Clostridioides difficile*. Trehalose has been  
 4 reported to enhance virulence of certain *C. difficile* ribotypes; however, such variants are  
 5 widespread and not correlated with clinical outcomes for patients suffering from *C. difficile*  
 6 infection (CDI). Here, we make preliminary observations to how to trehalose  
 7 supplementation affects the microbiota in an *in vitro* model and show that trehalose can  
 8 reduce the outgrowth of *C. difficile*, preventing simulated CDI. Three clinically reflective  
 9 human gut models simulated the effects of sugar (trehalose or glucose) or saline ingestion on  
 10 the microbiota. Models were instilled with sugar or saline and further exposed to *C. difficile*  
 11 spores. The recovery of the microbiota following antibiotic treatment and CDI induction was  
 12 monitored in each model. The human microbiota remodeled to utilise the bioavailable  
 13 trehalose. Clindamycin induction caused simulated CDI in models supplemented with either  
 14 glucose or saline; however, trehalose supplementation did not result in CDI, although limited  
 15 spore germination did occur. The absence of CDI in trehalose model was associated with  
 16 enhanced abundances of *Finegoldia*, *Faecalibacterium* and *Oscillospira*, and reduced  
 17 abundances of *Klebsiella* and *Clostridium* spp., compared with the other models. Functional  
 18 analysis of the microbiota in the trehalose model revealed differences in the metabolic  
 19 pathways, such as amino acid metabolism, which could be attributed to prevention of CDI.  
 20 Our data show that trehalose supplementation remodelled the microbiota, which prevented  
 21 simulated CDI, potentially due to enhanced recovery of nutritionally competitive microbiota  
 22 against *C. difficile*.

23

# 1 Introduction

2 Trehalose is a disaccharide sugar consisting of two  $\alpha$ -glucose monomers linked via 1,1-  
3 glycosidic bond and is present in a wide variety of organisms, such as bacteria, yeast, insects,  
4 plants, and animals. The structure of trehalose makes it highly resistant to acid hydrolysis, it  
5 is used as a high energy storage molecule for insect flight, and also as a dehydration or cryo-  
6 protectant in some microorganisms, plants and animals(1). This sugar is naturally found in  
7 foods, such as mushrooms and honey, but following the discovery of a cost-effective method  
8 of large-scale production(2) and regulatory approval as a food additive, trehalose is now also  
9 added to a range of processed food products (cereals, pasta, sweets and ice cream), cosmetics  
10 and some medicines(3,4). In the human digestive tract, trehalose is metabolised by host-  
11 produced trehalase enzymes located at the intestinal brush border, as well as microbial-  
12 produced trehalases. Many intestinal bacteria and yeasts produce trehalase enzymes,  
13 including *Bacillus* spp., *Escherichia coli*, *Blautia* spp., *Lactobacillaceae* and the nosocomial  
14 pathogen *Clostridioides difficile*(5–7).

15 *C. difficile* is the leading cause of antibiotic-associated diarrhoea(8), where antibiotic-induced  
16 microbiota depletion provides favourable conditions to the germination of *C. difficile* spores,  
17 which proliferate and produce toxins that cause disease. These toxins (TcdA and TcdB) are  
18 responsible for a range of symptoms from mild, self-limiting diarrhoea to pseudomembranous  
19 colitis, colonic perforation and death(8). Antibiotic treatment can fail to resolve the infection,  
20 with up to 30% of cases recurring after primary treatment(9). Depletion of the intestinal  
21 microbiota means *C. difficile* is exposed to several compounds normally metabolised by the  
22 healthy microbiota; some of these are used as either molecular signals or as a source of  
23 energy, such as the primary bile acids cholate and succinate(10,11). Collins *et al.* showed that  
24 ingested trehalose enhanced *C. difficile* virulence(12). Additionally, *C. difficile* ribotypes  
25 (RT) typically associated with CDI outbreaks, e.g. RT027 or RT017, have a mutated *treR*  
26 repressor gene, which overexpresses the trehalose metabolism gene (*treA*), whereas others,  
27 i.e. RT078, show enhanced trehalose uptake, through the presence of a novel  
28 phosphotransferase (PTS) system transporter(7). However, it is reported that such variants are  
29 common in *C. difficile* isolates and comparison of the clinical outcome of CDI patients to  
30 trehalose metabolic genotype of the isolated strain found no correlation between 30-day  
31 mortality and the trehalose metabolic genotype (13). Moreover, Saund *et al.* found no  
32 statistically significant association between the presence of trehalose utilisation variants in  
33 infecting *C. difficile* strains and the development of severe infection outcome(14).

1 Using a previously successful *in vitro* model developed to simulate human CDI in the large  
2 intestine(15), we measured microbial compositional changes following trehalose and glucose  
3 supplementation and the effect of sugar supplementation on *C. difficile* growth kinetics after  
4 antibiotic disruption of the microbiota. A schematic timeline of our experimental design is  
5 shown in **Figure 1**. Enumeration of *C. difficile* from the *in vitro* gut model when predicting  
6 treatment and antibiotic induction outcomes have been shown to be clinically reflective, and  
7 in some cases, more accurate than results from animal models. Antibiotics with a high  
8 propensity to induce CDI in patients also induce simulated CDI within the gut model(15–18).  
9 Conversely, antibiotics with a lower *in vitro* propensity to induce simulated CDI are now  
10 recognised to have low CDI risk(18,19). Crucially, the gut model has been used for *in vitro*  
11 evaluation of drug efficacy against simulated CDI at various stages of pre-clinical and  
12 clinical drug development. For fidaxomicin, data from animal and *in vitro* models correlated  
13 well with Phase III clinical trials(16,21,22), whereas for the toxin binding agent, tolevamer,  
14 results from the triple-stage gut model predicted clinical failure of this agent at Phase III,  
15 while animal model data did not(23–25). Following gut model investigations of  
16 cadazolid(26), surotomycin(27) and SMT19969(28) for treatment of CDI, these agents have  
17 progressed to Phase III clinical trials. A recent publication detailing efficacy of extended  
18 duration fidaxomicin therapy(29) led to the current Phase IIIB/IV trial investigating such  
19 dosing regimens in the clinic(30). In fact, data from gut model studies(19,31,32) have  
20 informed UK national antibiotic prescribing guidelines(33).

# 1    **Results**

## 2    *Reconstitution of the human microbiota in the gut model*

3    Each triple-staged gut model is seeded with a faecal slurry made using the pooled faecal  
4    matter from five healthy donors to capture a diverse representation of the human microbial  
5    populations. Firstly, we sought to characterise the microbial diversity captured from this  
6    slurry in each gut model. The donors used in this study showed distinct microbial profiles to  
7    each other (**Supplementary Table 1**), except for donors E and C, which clustered together,  
8    indicating similar microbiota profiles. Similarly, the faecal slurry used clustered distinctly  
9    from each donor but nested amongst the donors, suggesting the slurry contains the overall  
10    diversity from the donors; indeed, the slurry contained 36 bacterial families, more than each  
11    individual donor (**Figure 2A**). As determined by bacterial taxonomic analysis by 16S rRNA  
12    sequencing, the slurry was found to contain bacterial family members that were unique to a  
13    single donor, for example *Eubacteriaceae* and *Muribaculaceae* were only present in Donor C  
14    and the slurry (**Supplementary Table 1**). Once the microbial populations had stabilised in  
15    the three models, the predominant bacterial families were represented at similar levels to the  
16    slurry (**Figure 2BC**), although some differences were observed. Compared with the faecal  
17    slurry, *Bifidobacteriaceae* abundance increased and *Clostridiaceae* abundance decreased in  
18    all models at steady state, whereas *Coriobacteriaceae* showed increased abundance in models  
19    G and S and *Enterococcaceae* abundance increased in model T (**Figure 2C**). However,  
20    *Bifidobacteriaceae* did decrease in all models one week later, which was confirmed by direct  
21    enumeration.

## 22    *Trehalose induced changes to the gut model microbiota*

23    Changes in the bacterial composition of the three models (T, G, and S) were monitored by  
24    16S rRNA sequencing and taxonomic analysis (timepoints shown in **Figure 1**) and direct  
25    enumeration of selected bacterial populations (daily monitoring), to determine how trehalose  
26    dosing affected the gut microbiota, compared to glucose or saline. The trehalose dosing  
27    regimen in model T was designed to mimic the average trehalose content from meals  
28    consumed thrice daily by an adult, which can vary amongst adults and different  
29    countries(3,34). Trehalose was undetected in the saline (control) model S and was only  
30    detected periodically in vessel 1 (proximal colon, pH 5.5±0.2) of the model G dosed with  
31    glucose (0.01 mM), whereas trehalose supplementation in model T increased detectable  
32    trehalose concentrations, peaking at 8.1 mM in vessel 1 of model T prior to addition of

1 antibiotics (**Figure 3**). Trehalose was largely undetectable in vessels 2 (medial colon, pH  
2  $6.2 \pm 0.2$ ) and 3 (distal colon, pH  $6.8 \pm 0.2$ ) of each model, although trehalose was observed in  
3 vessel 2 up to three days after commencing dosing, peaking at 4.3 mM (**Supplementary**  
4 **Table 2**). As trehalose can be catabolised into two glucose molecules, model G was dosed  
5 with glucose at double the concentration of trehalose to determine if any effects of trehalose  
6 on the microbial populations was not due to the increased glucose availability (**Figure 3B**).  
7 Prior to antibiotic dosing, commencement of the glucose dosing regimen was associated with  
8 a peak glucose concentration of 16.1 mM, compared with 0.1 mM and 0.007 mM in models T  
9 and S, respectively. Whilst the microbial populations largely remained stable in the control  
10 (saline dosed) model, increased trehalose exposure was specifically associated with an  
11 increase in abundance of *Bacteroides uniformis* to almost 3 % of the total bacterial  
12 populations, identified by shotgun metagenomic sequencing. This increase was confirmed by  
13 selective enumeration of *Bacteroides* spp. and species identification by MALDI-TOF  
14 analysis. Similar abundance increases were observed in other microbial populations of model  
15 T, *Coprococcus* spp. (*C. catus*, *C. comes* and *C. eutactus*), *Blautia* spp. (*B. producta* and *B.*  
16 *obeum*), *Veillonella dispar* and *Lactobacillaceae* (*L. fermentum* and *L. johnsonii*) (**Figure**  
17 **4A**). The enumerated recoveries of *Lactobacillus* spp. in model T showed a  $1.2 \log_{10}$  cfu/ml  
18 increase in response to trehalose instillation (**Supplementary Figure 1C**). However, the  
19 changes in microbiota did not result in germination of *C. difficile* spores. This increase in  
20 certain bacterial populations were mirrored by an increase in the number of Pfam domains  
21 associated with trehalose metabolism in model T. Trehalase (PF01204/EC:3.2.1.28) and  
22 trehalose phosphatase (PF02358/EC:3.1.3.12) Pfam domains increased 1.4- and 3.4-fold,  
23 respectively, in abundance upon commencement of trehalose dosing compared with pre-  
24 trehalose levels.

#### 25 *Antibiotic induced dysbiosis increased trehalose bioavailability*

26 CDI induction is reliant on microbial disruption, typically through antibiotic exposure. As we  
27 observed sugar-mediated microbiota reconfiguration in our models, we sought to determine  
28 how clindamycin induced(16) disruption affected the bioavailability of trehalose that could  
29 subsequently be utilised by *C. difficile*. Clindamycin levels in vessel 1 peaked at 93.1, 142.5  
30 and 127.1 mg/l, in models G, T and S, respectively. Upon clindamycin instillation, bacterial  
31 diversity significantly decreased ( $p < 0.001$ ) from pre-clindamycin levels across all the  
32 models to a similar extent (**Figure 4**); however, by three weeks after cessation of clindamycin  
33 instillation, bacterial diversity had not recovered to pre-clindamycin levels. This decreased

diversity in all models was characterised by significant ( $p \leq 0.01$ ) reductions to *Bifidobacteriaceae*, *Bacteroidaceae* (*B. gallinarum* and *B. intestinalis*), *Lachnospiraceae*, *Alcaligenaceae*, *Porphyromonadaceae* and *Veillonellaceae* populations, either during (intra-) or just after (four days post) clindamycin (**Figure 4**). However, *Enterobacteriaceae* (specifically *E. coli* and *K. pneumoniae*, as determined by MALDI-TOF analysis) and *Enterococcaceae* increased in relative abundance either during or just after antibiotic withdrawal, with an increase in bacterial populations confirmed by direct culture using selective agars (*Enterobacteriaceae* increased 2.4, 2.3, and 2.5 log<sub>10</sub> cfu/ml; *Enterococcus* increased 1.8, 2.2, and 2.3 log<sub>10</sub> cfu/ml, in models G, S and T, respectively, during this time) (**Supplementary Figure 1**). This pattern of clindamycin-induced microbial dysbiosis is synonymous with induction of CDI in our *in vitro* gut model, as previously seen (13,16).

Microbial dysbiosis in model T correlated with increased luminal concentrations of trehalose in all vessels (**Supplementary Table 2**); peak trehalose detection in vessels 1, 2 and 3 were 13.3, 6.7 and 2.5 mM, respectively (**Figure 3**). However, luminal concentrations of trehalose reduced to undetectable levels in vessels 2 and 3, and to approximately 2.1 mM in vessel 1, on the last day of clindamycin instillation (day 31). A similar pattern of increased trehalose bioavailability during clindamycin instillation, albeit at much lower levels, was observed in models G (vessels 1-2) and S (vessel 1-3), which, although were not dosed with trehalose throughout the experiment, had trehalose in the growth media. During clindamycin instillation, we detected greater bioavailability of glucose in all models at day 26, particularly in vessel 1 (**Figure 3**). Model G had the highest concentration, peaking at 28.3 mM and concentrations in models T and S peaked at 1.6 and 1.8, respectively. The initial reduction in microbial diversity caused by clindamycin, and the increased trehalose bioavailability, resulted in an increased abundance of microbial genomes harbouring Pfam domains for trehalose metabolism [trehalase (clan 0059) and trehalose phosphatase (clan 0137)]; these domains increased 4.4- and 12.8-fold, respectively, compared with the abundance of these domains pre-trehalose levels. One week after clindamycin, the abundance of these Pfam domains reduced to levels similar to pre-clindamycin.

### *Trehalose induced microbiome changes prevents simulated CDI*

We hypothesized that the differential pattern of clindamycin-induced microbiota disruption, seen between the three models, and the subsequent microbial recoveries would affect the progression of simulated CDI. Prior to clindamycin instillation, in both the saline supplemented model S (**Figure 5A**), and the glucose supplemented model G (**Figure 5B**), *C.*



1 *difficile* populations remained in the form of spores from its addition to the models on day 14.  
 2 However, *C. difficile* germination and outgrowth was detected one-week post clindamycin  
 3 (day 38) with toxin detected from two days later until the end of the experiment, which is  
 4 consistent with simulated CDI. Similarly, in the trehalose supplemented model, *C. difficile*  
 5 spores remained quiescent until day 38, where we detected germination and limited  
 6 outgrowth but, crucially, no toxin was detected throughout the experiment and the *C. difficile*  
 7 levels decreased four days later to those consistent with the recovery of *C. difficile* spores  
 8 (**Figure 5C**). We have previously reported this phenotypic observation in our gut model(13).  
 9 Thus, we further investigated the comparative microbiota differences and metabolic  
 10 abundances on this day between models S/G and model T related to *C. difficile* proliferation  
 11 and onset of simulated CDI.

12 Metagenomic analysis of the microbiota between models S/G and model T on day 38  
 13 highlighted 25 significant differentially abundant bacterial communities between model T (no  
 14 simulated CDI) and models S and G (induced simulated CDI) (**Table 1**). *Fingoldia magna*,  
 15 *Blautia obeum*, *Faecalibacterium prausnitzii*, *Dorea formicigenerans*, *Lactobacillus*  
 16 *rhamnosus* and *Oscillospira ruminantium* were significantly ( $p < 0.001$ ) more abundant in  
 17 model T compared with models G and S, whereas, *Phascolarctobacterium* spp., *Klebsiella*  
 18 spp. (*K. pneumoniae* and *K. aerogenes*), *E. faecalis* and several *Clostridium* spp. [*C.*  
 19 *symbiosum*, *C. clostridioforme*, *C. citroniae* and *Hungatella hathewayi* (formally known as *C.*  
 20 *hathewayi*)] were significantly less abundant in model T. The increased abundance of  
 21 *Lactobacillus* spp. in model T at day 38 compared with models S and G, was confirmed by  
 22 direct enumeration, where *Lactobacillus* spp. levels in model T were 5.9 log<sub>10</sub> cfu/mL,  
 23 compared with 3.8 and 3.2 log<sub>10</sub> cfu/mL for models S and G, respectively (**Supplementary**  
 24 **Figure 1**). Similarly, at day 38, the recovery of *Clostridium* spp. and *Enterobacteriaceae*  
 25 were higher in models S and G, compared with model T (**Supplementary Figure 1**).  
 26 Analysing the metagenome function showed that components of the V/A-type ATPase were  
 27 more abundant in models G and S, a conserved ATPase found only in *Enterococcus* spp.(35).  
 28 Additionally, the high levels of *Clostridium* spp. (including former *Clostridium* species)  
 29 found in models G and S was reflected in the increased abundance of those genetic elements  
 30 involved in the sporulation cascade (*spo* genes).

31 Long-term supplementation of trehalose was associated with enhanced recovery of the  
 32 Ruminococcaceae family, particularly the *Oscillospira*, *Erysipelotrichaceae* and  
 33 *Anaeroplasmataceae* genera, 3-weeks post-clindamycin (**Figure 4A**). Inversely,



1 *Bifidobacteriaceae* abundance in model T took longer to recover than the other models,  
2 where abundance remained at approximately 2 % compared with 7.2-7.6 % abundance  
3 observed in the other models. This was reflected in the bacterial recoveries where  
4 *Bifidobacterium* spp. levels recovered by days 13 and 9 (after clindamycin instillation) in  
5 models S and G, respectively, and day 19 in model T (**Figure 4**).

# 6 *Functional microbiome changes associated with CDI*

7 In order to identify the microbial pathways active during CDI induction, a functional analysis  
8 of KEGG metabolic pathways was performed between model T, supplemented with  
9 trehalose, and models G and S, supplemented with glucose and saline (**Supplementary**  
10 **Table 3**). Comparison of the functional metabolic pathways between models was performed  
11 on day 38 (one-week post clindamycin), when CDI was detected in models G and S but not in  
12 model T. Model T showed differences to the metabolic landscape and cell surface  
13 components of the microbial species present, in comparison to models G and S. Whilst the  
14 abundance of genes involved in glucose/gluconeogenesis and the pentose phosphate pathway  
15 were similar across the models, other metabolic pathways that produced the central  
16 metabolites glyceraldehyde-3 phosphate (G3P) and D-glucose from different sugar sources,  
17 such lactose, galactose and *myo*-inositol, were more abundant in models G and S, whereas  
18 genes involved in trehalose metabolism were more abundant in model T (**Figure 6A**).  
19 Interestingly, several pathways to produce amino acids (glutamine and glutamate) or amino  
20 acid precursors (chorismate and D-ribose-1,5P) were abundant in models G and S. Alongside  
21 the increased abundance of the intracellular stress molecule guanosine pentaphosphate  
22 (ppGpp), this could indicate a depleted pool of free amino acids (**Supplementary Figure 2**).  
23 In contrast, we detected an increased abundance of genetic components involved in the  
24 conversion of L-glutamine to the short chain fatty acid, butyrate (**Figure 6A**).

25 Differential abundance analysis of the shotgun metagenome sequences from these models  
26 suggests that the microbial species could have distinctive cell surface arrangements. In all  
27 three models, genetic elements associated with biofilm formation were present; however,  
28 these genetic elements were different between the models. Model T had increased abundance  
29 of genes involved with curli biosynthesis, important in Enterobacteriaceae biofilm formation,  
30 whereas, the genes involved in production of extracellular matrix (PGA) were more abundant  
31 in models G and S (**Figure 6B**). The presence of classical virulence factors were also  
32 different; genetic elements associated with siderophore production (yersiniabactin and  
33 bacitracin) and type 4 secretion systems (T4SS) were more abundant in models G and S,

1 whilst genes involved in the production of polysaccharide capsule were less abundant.  
 2 Additionally, ABC transporter systems were different between the models; sugar transport  
 3 systems, for ribose, lactose, arabinogalactan and cellobiose, were more abundant in models G  
 4 and S, whilst the general L-amino acid transporter was more abundant in model T (**Figure**  
 5 **6B**).

# 1 Discussion

2 The consumption of trehalose has been proposed to contribute to the emergence and  
3 virulence of CDI outbreaks, specifically in those RTs harbouring genetic trehalose  
4 metabolism variants(7,12). Some RT lineages, such as RT027, have a mutated repressor,  
5 *treR*, gene, whilst others, such as RT078, have acquired a putative *ptsT* transport system,  
6 which gives them a competitive advantage during pathogenesis(12). However, we and others  
7 have reported that these genetic variants are common in multiple *C. difficile* lineages not  
8 associated with clinical outbreaks and there was no association between trehalose metabolism  
9 variant and clinical outcome(13,14). Here we describe the effects of trehalose  
10 supplementation on the human microbiota and how the recovery of the microbiota can affect  
11 simulated CDI, using a clinically reflective gut model. This model has been used to  
12 successfully predict trial outcome at various stages of pre-clinical and clinical therapeutic  
13 development. However, due to the limited number of biological replicates (n=2), our  
14 conclusions are presented as preliminary findings. Numerous reports have highlighted key  
15 microbiota differences between humans and mice(36,37), which is potentially important  
16 given the contribution of the microbiota towards colonisation resistance against CDI. Indeed,  
17 mice bred in captivity, on the same diet, have a similar microbiota(38), which is far removed  
18 from the heterogeneity displayed within in a human population, and could result in different  
19 clinical outcomes(39). The major human microbial communities present in the donor faeces  
20 were represented in the faecal slurry used to seed each model, and we subsequently  
21 recaptured these communities in each of our human ‘gut models’. Three independent models  
22 were run in parallel, supplemented with either trehalose, glucose or saline. As trehalose can  
23 be metabolised into two glucose molecules, this experimental approach was used to delineate  
24 the effects of trehalose rather than its breakdown product.

25 Trehalose supplementation immediately increased the trehalose concentration in vessels 1  
26 and 2; however, despite continued trehalose supplementation, the levels decreased to  
27 undetectable levels, suggesting microbial trehalose metabolism. This drop in trehalose  
28 concentration was specifically associated with an increased abundance of trehalose  
29 metabolising Pfam domains and a corresponding remodelling of the microbiota to include  
30 higher abundancies of *B. uniformis*, *B. producta* and *V. dispar*. Many strains of these  
31 bacterial species are known to harbour *treA*-like genes, a trehalose-6-phosphatase that  
32 metabolises trehalose into glucose and glucose-6-phosphate monomers(40–42). Trehalose  
33 metabolism appears not to be restricted to these bacterial species, indeed, the UniProt protein

sequence repository suggests trehalose metabolising genes are ubiquitous amongst bacterial species(6). Further evidence of the role of the intestinal microbiota to metabolise trehalose is shown during clindamycin exposure. Clindamycin is a broad-spectrum antibiotic that has previously been shown to induce CDI in our gut model(16). Clindamycin instillation decreased the microbial diversity in all models, causing simulated intestinal dysbiosis, which correlated with increased bioavailability of trehalose. The levels of trehalose returned to undetectable levels in vessels 2 and 3 prior to completion of the clindamycin regimen; these vessels simulate the medial and distal colon, which is most conducive for CDI(15). We used a highly sensitive method to quantify trehalose/glucose concentrations, with a limit of detection at 0.5µM. Collins *et al.* reported *C. difficile* trehalose metabolism variants that could utilise 50µM-25mM concentrations of trehalose more efficiently, compared with wildtype trehalose metabolism variants(12). We hypothesised that, although *C. difficile* trehalose metabolism variants could have a competitive advantage over wildtype isolates, this competitive advantage is diminished in the presence of the human microbiota, as the intestinal microbiota is an important source of trehalose metabolism, potentially reducing the bioavailability of trehalose during CDI. Further evidence for this is shown using degradation-resistant trehalose analogues, such as lactotrehalose, which show enhanced faecal bioavailability and, additionally, does not induce CDI in a mouse model(43). The Ribotype 027 strain used in our studies possesses a *treR* mutation; it would be interesting to determine the competitiveness of a strain harbouring a putative *ptsT* transport system, which gives them a competitive advantage during pathogenesis(12).

Instillation of clindamycin did result in induction of simulated CDI in models supplemented with either glucose or saline; however, trehalose supplementation did not result in simulated CDI ((13) and **Figure 5**). Differential taxonomic abundance between model T and models G/S identified bacterial species that were either more (n=7) or less (n=8) abundant in model T; although these data are from one independent biological repeat of each condition. Of the bacterial species associated with protection against CDI, *B. uniformis* was the dominant *Bacteroides* species identified in model T (4% of total reads) and is capable of metabolising trehalose. Through metabolite cross-feeding, *B. uniformis* can support the growth of *F. prausnitzii*(44), and vice versa, which enhances the growth of both species. *F. prausnitzii* is known to produce butyrate and formate, which have been shown to reduce inflammation during infection(45), but increased levels of *F. prausnitzii* were associated with recovery from CDI in patients and *in vivo* models(46,47). Strains of *B. obeum* can also utilise

1 trehalose, and crucially, have been shown to reduce virulence gene expression, through  
2 quorum sensing, during *Vibrio cholerae* infection(48); toxin synthesis by *C. difficile* can be  
3 regulated by different quorum sensing(49,50). The metabolic interconnectivity between these  
4 microbial species could represent a consortium that competes for nutrients utilised by *C.*  
5 *difficile* after spore germination (as hypothesised in **Supplementary Figure 3**). Furthermore,  
6 the increased abundance of these bacterial species associated with CDI prevention in model T  
7 are less abundant in the faeces from CDI patients and have been attributed with protective  
8 effects in putative microbiome restoratives(51–53). Moreover, carbohydrate-induced  
9 microbiota outgrowth, and subsequent metabolic products, were associated with a decrease in  
10 *C. difficile* fitness(54), similar to our *in vitro* findings. Aside from acting as a potential carbon  
11 source, intracellular trehalose has unique properties that could protect cells from the effects of  
12 antibiotics, such as a membrane osmoprotectant and a protein stabilising molecule(1,55).

13 Interestingly, 4 different *Clostridium* spp. were associated with CDI induction in model's  
14 G/S. A similar observation was noted by Khanna *et al.*(46) and Daquigan *et al.*(56), where  
15 several *Clostridium* spp. were associated with increased *C. difficile* abundance in CDI and  
16 recurrent CDI patients. Additionally, Girinathan *et al.*, showed the presence of *Clostridium*  
17 *sardiniense* enhanced CDI in an *in vivo* model of disease(57). Conversely, the authors  
18 observed that *C. bifermentans*, an amino acid fermenter, prevented CDI-induced death in an  
19 animal model of infection. As *C. difficile* utilises amino acids during growth expansion as  
20 both a carbon source and an energy source, via Stickland reactions(58,59), microorganisms  
21 that compete for bioavailable amino acids, such as *C. bifermentans*, could prevent the rapid  
22 proliferation of *C. difficile* during CDI(57). Indeed, the CDI-linked functional profile of the  
23 microbiota favoured the production of amino acids (or amino acid precursors) from sugars,  
24 potentially due to a reduced pool of bioavailable amino acids after being used by *C. difficile*  
25 during pathogen expansion. This was mirrored in the functions of the cell surface ABC  
26 transporters where there was an increased abundance of sugar transporters in models G and S,  
27 potentially associated with *C. difficile* proliferation niche. The identified metabolic pathways  
28 and putative metabolic products associated with CDI induction in our gut models, namely  
29 G3P/D-ribose-5P/succinyl-CoA/inosine, have been shown to be utilised by *C. difficile* during  
30 *in vivo* growth in a murine model of infection(60).

31 By studying the effect of trehalose at a systems level, we outline plasticity of the human  
32 microbiome to adapt to utilise this carbon source, providing competition with *C. difficile*. The  
33 absence of enhanced CDI associated with trehalose in this model system, and the mechanisms

1 explained, could help explain why clinical outcome was not associated with genetic markers  
 2 for enhanced trehalose metabolism. Contrary to enhancing CDI, trehalose utilisation was  
 3 preliminary linked with a consortium of cross-feeding microbial species that may be  
 4 antagonistic to the growth of *C. difficile*, which can form the rationale for the basis of  
 5 microbial therapies used for treating CDI infections (**Supplementary Figure 3**). Further *in*  
 6 *vitro* and *in vivo* studies are required to confirm these preliminary data.

7

# 1 **Materials and methods**

## 2 *Gut model set up*

3 Three triple-stage *in vitro* gut models were run in parallel as previously described(61).  
 4 Briefly, each model consists of three chemostat vessels arranged in a weir cascade system,  
 5 top-fed with a complex growth medium at a controlled rate ( $D=0.015\text{ h}^{-1}$ ). All three vessels  
 6 were continuously stirred, anaerobically maintained at 37 °C and regulated to reflect *in vivo*  
 7 intestinal conditions. The three vessels are representative of the colon, reflecting increased  
 8 pH and decreased nutrient availability from the proximal colon (vessel 1, pH  $5.5\pm0.2$ ),  
 9 through the medial colon (vessel 2, pH  $6.2\pm0.2$ ) to the distal colon (vessel 3, pH  $6.8\pm0.2$ ). A  
 10 faecal slurry (10% w/v) was made by diluting pooled human faeces from healthy elderly  
 11 volunteers (n = five; >59 years of age; CDI negative; no prior three-month history of  
 12 antibiotic exposure) with pre-reduced PBS. Donors over the age of 59 were used to represent  
 13 the at-risk group for developing CDI. This slurry, approximately 500 ml per model, was used  
 14 to seed the vessels for each gut model at the start of the experiment.

## 15 *Experimental timeline*

16 For each model, the microbial populations were allowed to equilibrate for two weeks to reach  
 17 ‘steady state’ without intervention; consistent stable microbial recoveries over 5 days from all  
 18 microbial populations tested was used to determine ‘steady state’. A single one mL aliquot of  
 19 *C. difficile* RT027 strain 210 spores (approximately  $10^7$  cfu/ml) were inoculated into vessel 1  
 20 of each model and sugar supplementation commenced (**Figure 1**). Models were dosed with  
 21 either glucose (n=1 model; model G; 1120 mM dosed thrice daily for 35 days), trehalose  
 22 (n=1 model; model T; 560 mM thrice daily for 35 days), or phosphate buffered saline (n=1  
 23 model; model S; thrice daily for 35 days) (**Figure 1 – green arrow**). The dosing regimens  
 24 were inoculated in vessel 1, and sufficient to achieve final trehalose and glucose  
 25 concentrations in vessel 1 of each model of 10 mM and 20 mM, respectively, i.e. consistent  
 26 with levels observed in humans consuming trehalose(3,34). A second dose of *C. difficile*  
 27 strain 210 spores were inoculated as previously described, followed by a clindamycin  
 28 regimen (33.9 mg/l four times daily for seven days) to induce simulated CDI(16). The first *C.*  
 29 *difficile* spore dose was added to ensure that the microbial populations within the model had  
 30 equilibrated and were able to prevent *C. difficile* spore germination; an effect called  
 31 colonisation resistance. This ensured that the effects of any downstream manipulations of the  
 32 microbiota were due to those manipulations rather than incomplete colonisation resistance.



# 1 *Preparation of Ribotype-027 C. difficile strain 210 spores*

2 Similar to other strains of ribotype-027, *C. difficile* 210 strain has a mutated *treR* repressor  
3 gene, as reported in(12). *C. difficile* spores for gut model inoculation were prepared as  
4 previously described(62). Briefly, *C. difficile* 210 was grown in BHI broth anaerobically at 37  
5 °C for six days and removed from the incubator and incubated aerobically at room  
6 temperature overnight to further induce sporulation. Growth was harvested by centrifugation  
7 and incubated with PBS supplemented with 10 mg/ml lysozyme at 37 °C overnight. Samples  
8 were separated using a sucrose gradient and spores were treated with PBS supplemented with  
9 20 ng/mL protease K and 200 nM EDTA. Spores were separated using a sucrose gradient and  
10 washed with PBS twice before a final resuspension in 30 ml. These were enumerated and  
11 diluted to approximately  $1 \times 10^7$  spores/ml for use in the models.

# 12 *Bacterial enumeration using selective agars*

13 Vessel 3 of models T, S and G was sampled daily for culture profiling of total bacteria,  
14 lactose-fermenting Enterobacteriaceae, *Clostridium* spp., *Lactobacillus* spp., *Bifidobacterium*  
15 spp., *Enterococcus* spp., and *Bacteroides* spp., and *C. difficile* populations as described in  
16 **Supplementary Methods** and **Supplementary Table 4**. Colonies from these plates were  
17 identified to a species level by MALDI-TOF analysis.

# 18 *Cytotoxin assay*

19 A VERO cell-based assay was used to approximate the level of toxin present in the gut  
20 model. This assay is a semi-quantitative measure of toxin activity within the gut models as  
21 many factors can affect the action of the toxin, e.g. protein levels, which were not normalised  
22 across each time point & sample. Samples from vessels 1, 2 & 3 were centrifuged and stored  
23 at 4 °C before testing. Samples were serially diluted 1:10 and co-incubated with a confluent  
24 monolayer of VERO cells and incubated for 48 hr at 37 °C, 5 % CO<sub>2</sub>. Toxin positivity was  
25 indicated by >50 % cell rounding, while the confluent cell monolayer was unaffected in toxin  
26 negative samples. Presence of *C. difficile* toxin was confirmed by neutralisation of neat  
27 sample with *C. sordellii* antitoxin.

# 28 *Antibiotic bioassay*

29 The concentration of clindamycin in each vessel was determined by bioassays as previously  
30 described(16). Briefly, indicator organism *Kocuria rhizophila* (ATCC 9341) was inoculated  
31 into Wilkins-Chalgren agar and aseptically transferred into 245 x 245 mm agar plates. These  
32 plates were allowed to set, and nine mm wells were made using a cork borer. A calibration

1 series of the antibiotic was added to each plate and samples loaded into the wells. Plates were  
2 incubated overnight, aerobically at 37 °C. Zone diameters were measured using callipers and  
3 concentration curves plotted from squared zone diameters and unknown concentrations from  
4 vessel supernatants determined. Assays were performed in triplicate.

#### 5 *Trehalose and glucose concentration*

6 Daily gut model samples from all vessels of each model were assessed by ion  
7 chromatography for trehalose and glucose concentrations. Samples were tested in a blind  
8 fashion. Gut model samples were centrifuged at 15,000 rpm for 10 mins, and the supernatant  
9 was further centrifuged using millipore centrifugal filter units with a 50 kDa and 3kDa cut off  
10 to remove proteins and bigger macromolecules. Samples were diluted 1:10 in ultrapure water  
11 and analysed by ion chromatography. 25 µl of sample was injected on a Dionex ICS-5000  
12 plus ion chromatography system (Thermo fisher Scientific, USA). The separation was carried  
13 out on a Dionex CarboPac PA1 Analytical Column (4 x 250 mm) with a Dionex CarboPac  
14 PA1 Guard Column (4 x 50 mm). The column temperature was set at 30°C. Elution was  
15 performed using three elutants; A: ultrapure water, B: 300 mM sodium hydroxide and C:300  
16 mM sodium hydroxide with 1500 mM sodium acetate, with a flow rate of one ml/min. The  
17 linear gradient condition is shown in **Supplementary Table 5**. The analytes were detected by  
18 using an electrochemical detector.

#### 19 *DNA extraction, bacterial 16S rRNA library preparation and sequencing*

20 The bacterial 16S rRNA sampling regimen from vessel 3 of all three models are shown in  
21 **Figure 1**. Samples were taken on the day but prior to the first sugar dose, first clindamycin  
22 dose, in the middle of clindamycin dosing, 2 days after last clindamycin dose, i.e. after  
23 washout of clindamycin from the system, and weekly thereafter. Four one ml aliquots,  
24 representing four technical replicates, from vessel 3 of each model were pelleted, the  
25 supernatant discarded, and the DNA extracted from the pellet using FastDNA<sup>TM</sup> SPIN kit for  
26 soil (MP Biomedicals<sup>TM</sup>) following manufacturers' instructions. DNA was stored at -80 °C  
27 until used for downstream analysis. DNA quality and double-stranded quantities were  
28 determined using the picogreen absorption method. Bacterial 16S rRNA V4 fragments were  
29 PCR amplified using NEBNext Q5 Hot Start HiFi PCR master mix (NEB, U.K.) with  
30 universal 16S rRNA V4 primers [564F (TCGTCGGCAGCGTCAGATGTGTATAAGAGACAG-  
31 AYTGGGYDTAAAGNG) and 806R (GTCTCGTGGGCTCGGAGATGTGTATAAGAGACAG-  
32 TACNVGGGTATCTAATCC)] with Illumina adaptor sequence overhangs included using the

1 PCR cycle [denaturation (95 °C x3 min for 1 cycle), amplification (95 °C x30 sec, 50 °C x30  
2 sec, 72 °C x30 sec, for 28 cycles) and final elongation (72 °C x5 min for 1 cycle)]. PCR  
3 products were cleaned using AxyPrep Magnetic beads (Axygen, U.K.) and the 16S rRNA  
4 fragments checked using gel electrophoresis on an Agilent 2200 TapeStation system (Agilent  
5 Genomics, U.K.) before running a PCR for addition of the index sequences [denaturation (95  
6 °C x3 min for 1 cycle), amplification (95 °C x30 sec, 55 °C x30 sec, 72 °C x30 sec, for 8  
7 cycles) and final elongation (72 °C x5 min for 1 cycle)]. The fragments were cleaned,  
8 quantified (as before), normalised and samples sequenced using MiSeq sequencer (Illumina)  
9 with 250 bp paired-end reads. Library preparation and sequencing was done at the University  
10 of Leeds sequencing facility.

# 11 *Taxonomic analysis on 16S rRNA gene sequences*

12 Demultiplexed FASTQ files of 16S rRNA sequences were trimmed of adapter sequences  
13 using cutadapt(63), and samples were filtered based on the number of reads across all  
14 samples to provide similar coverage. We followed the standard operating procedure from the  
15 MOTHUR package (v.1.41.3)(64). The paired reads were joined together and assembled into  
16 the contigs, and quality controlled based on the parameters such as maxambig=0,  
17 minlength=177 and maxlength=237. Unique sequences were aligned against a tailor-made  
18 reference generated from SILVA SEED database (version 132) and further filtered according  
19 to their start and end positions in the alignments. In order to reduce the possible redundancy  
20 to a minimum, the identical and very similar sequences (within 2bp mismatch) were merged.  
21 The chimeric sequences were discarded based on the built-in VSEARCH method(65). OTUs  
22 (operational taxonomic units) were identified by clustering (0.5 UniFrac distance) the  
23 sequences and were assigned the consensus taxonomy information with label=0.03. Low  
24 abundant reads (<50 reads per sample, which accounted for <0.04% of the total reads) were  
25 removed before further analysis; however, this precludes the contribution of low abundance  
26 taxonomic families in our analysis whilst ensuring accuracy from sequencing artifact.  
27 Taxonomic analysis is represented as mean percent abundance from four technical replicates.  
28 To determine if a microbial community was differentially abundant between the technical  
29 replicates of the three models on a given day a differential abundance analysis was performed  
30 and a microbial community was considered significantly different when the false discovery  
31 rate (FDR)  $p$  value was  $\leq 0.01$  and a  $-1.5 \leq \text{Log}_2$  fold change  $\geq 1.5$  of the populations in  
32 model T in comparison with models G and S was observed. The same cut off values were  
33 used to determine the difference in abundance of the microbial populations of the slurry

1 compared to the models T, G, and S at day 14. For the calculations of bacterial diversity,  
2 Shannon diversity index was computed for all samples and the distance matrix based on  
3 thetacy approach was used for Principal Coordinates (PCoA) analysis and visualization for  
4 each group of samples, based on four technical replicates. A Mann-Whitney U test was  
5 performed to determine statistical significance between the pre-clindamycin Shannon  
6 diversity index reference and the other timepoints for each model.

# *7 Functional analysis of the microbiota*

8 All samples collected from model T throughout the experiment (time points shown in Figure  
9 1) and samples from model S and G on day 38 (1-week post clindamycin), were selected for  
10 shotgun metagenome sequencing. Four technical replicates were investigated for each time  
11 point. Extracted DNA was diluted to 500 ng and sheared to 200-300 bp using an E220  
12 focused ultrasonicator (Covaris, U.K.). NEBNext Ultra DNA Library prep kit for Illumina  
13 was used for adaptor ligation and to PCR enrichment following manufacturer's instructions.  
14 Libraries were sequenced using Illumina HiSeq 3000 sequencer (University of Leeds).  
15 FASTX-Toolkit (version 0.0.13) was used to trim the first 10 bp from the sequence reads.  
16 MEGAN UE (ultimate edition v6.18.0) was used to functionally annotate and compare the  
17 sequencing reads using inbuilt programme tools(66). Briefly, paired-end reads were aligned  
18 on to NCBI-nr database (version 14.12.19; nr.gr size: 52.5 Gb) using DIAMOND(67) and  
19 Meganizer was used to perform functional analysis of the DIAMOND input files using either  
20 an up-to-date representation of KEGG or Pfam-A database (version 32). KEGG orthologous  
21 groups (Ko groups) were mapped to enzymes that appear in metabolic pathways. Functional  
22 analysis using KEGG assigned 39-43% of the total reads to a Ko group. An abundance table  
23 of functional categories for each sample was generated and a differential proportion-based  
24 abundance analysis, based on z test(68), was performed. A functional annotation was  
25 considered significantly different when the false discovery rate (FDR)  $p$  value was  $\leq 0.05$  and  
26 a  $-1.5 \leq \text{Log}_2$  fold change  $\geq 1.5$  of the populations, based on z-score, in model T in  
27 comparison with models G and S. Variations in Ko groups (metabolic pathways and surface  
28 components) were considered significant when the fold-change of at least 80 % of the genetic  
29 components in that pathway were either more or less abundant (as described above). The  
30 abundance of trehalase-specific Pfam terms, trehalase (clan 0059) and trehalose phosphatase  
31 (clan 0137), throughout all timepoints of model T were compared, and fold change  
32 abundance calculated.

# 1 *Taxonomic profiling of whole genome sequences*

2 Taxonomic profiling from the whole genome paired sequences generated above was  
 3 performed using CLC Genomics Workbench (version 12.0.3), with the CLC Microbial  
 4 Genomics Module (version 4.8). Trimmed sequences were imported into the CLC software  
 5 and each sequence read individually mapped to the fully curated (as of June 2019) microbial  
 6 reference database, based on selected references from GenBank and RefSeq, using the default  
 7 settings in the *Taxonomic Profiling* tool. Abundance tables were merged, and the *Differential*  
 8 *Abundance Analysis* tool used to determine the abundance differential in taxa, compared to  
 9 model T, based on a Log<sub>2</sub> fold-change <-2 or >2 and a Wald test false discovery rate (FDR) *p*  
 10 value <0.001.

11

## 1 **Acknowledgements**

2 We thank Sharie Shearman for technical assistance with the gut model, and Dr Carr and Dr  
3 Raynor for preparing the sequencing libraries and performing the sequencing.

## 4 **Funding Information**

5 This study was supported by funds from Hayashibara Co. Ltd (Effect of trehalose on *C.*  
6 *difficile* infection using the *in vitro* gut model).

## 7 **Conflict of Interests**

8 MHW has received honoraria for consultancy work, financial support to attend meetings and  
9 research funding from Astellas, AstraZeneca, Abbott, Actelion, Alere, AstraZeneca, Bayer,  
10 bioMérieux, Cerexa, Cubist, Da Volterra, Durata, Merck, Nabriva Therapeutics plc, Pfizer,  
11 Qiagen, Roche, Seres Therapeutics Inc., Synthetic Biologics, Summit and The Medicines  
12 Company. IBM has received support to attend meetings from Techlabs Inc. AMB has  
13 received research funding from Seres Therapeutics Inc., Motif Biosciences plc., Nabriva  
14 Therapeutics plc, Tetrphase Pharmaceuticals, and Hayashibara Co. Ltd. All other author(s)  
15 declare that there are no conflicts of interest.

## 16 **Author Contributions**

17 A.M.B., T.H. and M.H.W. conceived and designed the experimental studies. A.M.B., I.B.M.,  
18 N.A., W.S., E.C., Y.N., H.C.H. and K.B. conducted the experiments. I.B.M., S.M., D.W. and  
19 A.M.B., analysed the experimental data. A.M.B., I.B.M., N.A. and M.H.W. wrote the  
20 manuscript with additional input from T.H., G.D., D.W., S.M. and I.B.M. All authors  
21 approved the manuscript.

## 22 **Ethics statement**

23 The collection and use of human faeces in our gut model has been approved by the School of  
24 Medicine Research Ethics Committee, University of Leeds (MREC 15-070 – Investigation of  
25 the Interplay between Commensal Intestinal Organisms and Pathogenic Bacteria).  
26 Participants were provided with a ‘Participant Information Sheet’ (PIS) detailing a lay  
27 summary of the *in vitro* gut model and the scientific work they were contributing to by  
28 providing a faecal donation. Within this PIS, it is explained that by providing the sample, the  
29 participant is giving informed consent for that sample to be used in the gut model.

30

# References

1. Elbein AD, Pan YT, Pastuszak I, Carroll D. New insights on trehalose: a multifunctional molecule. *Glycobiology*. 2003;13(4):17–27.
2. Maruta K, Nakada T, Kubota M, Chaen H, Kurimoto M, Tsujisaka Y, et al. Formation of Trehalose from Maltooligosaccharides by a Novel Enzymatic System. *Biosci Biotechnol Biochem*. 1995;8451(10):1829–34.
3. Food Standards Australia New Zealand (FSANZ). Final assessment report application A453: trehalose as a novel food. *FOOD Stand Aust NEW Zeal*. 2003;(May).
4. Pinto-bonilla JC, Olmo-jimeno A, Llovet-osuna F, Hernández- E. A randomized crossover study comparing trehalose/hyaluronate eyedrops and standard treatment: patient satisfaction in the treatment of dry eye syndrome. *Ther Clin Risk Manag*. 2015;11:595–603.
5. Arguelles JC. Physiological roles of trehalose in bacteria and yeasts: a comparative analysis. *Arch Microbiol*. 2000;174(4):217–24.
6. Bateman A, Martin MJ, O'Donovan C, Magrane M, Alpi E, Antunes R, et al. UniProt: The universal protein knowledgebase. *Nucleic Acids Res*. 2017;45(D1):D158–69.
7. Collins J, Danhof H, Britton RA. The role of trehalose in the global spread of epidemic *Clostridium difficile*. *Gut Microbes*. 2018;00(00):1–6.
8. Rupnik M, Wilcox MH, Gerding DN. *Clostridium difficile* infection: new developments in epidemiology and pathogenesis. *Nat Rev Microbiol*. 2009;7(7):526–36.
9. Marsh, J.W., Arora, R., Schlackman, J.L., Shutt, K.A., Curry, S.R., Harrison LH. Association of Relapse of *Clostridium difficile* Disease with BI/NAP1/027. *J Clin Microbiol*. 2012;50(12):4078–82.



- 1     10.    Sorg J a., Sonenshein AL. Bile salts and glycine as cogerminants for *Clostridium*  
2            *difficile* spores. J Bacteriol. 2008;190(7):2505–12.
- 3     11.    Ferreyra JA, Wu KJ, Hryckowian AJ, Bouley DM, Weimer BC, Sonnenburg JL. Gut  
4            microbiota-produced succinate promotes *C. difficile* infection after antibiotic treatment  
5            or motility disturbance. Cell Host Microbe. 2014;16(6):770–7.
- 6     12.    Collins J, Robinson C, Danhof H, Knetsch CW, Van Leeuwen HC, Lawley TD, et al.  
7            Dietary trehalose enhances virulence of epidemic *Clostridium difficile*. Nature.  
8            2018;553(7688):291–4.
- 9     13.    Eyre DW, Didelot X, Buckley AM, Freeman J, Moura IB, Crook DW, et al.  
10           *Clostridium difficile* trehalose metabolism variants are common and not associated  
11           with adverse patient outcomes when variably present in the same lineage.  
12           EBioMedicine. 2019;
- 13    14.    Saund K, Rao K, Young VB, Snitkin ES. Genetic Determinants of Trehalose  
14           Utilization Are Not Associated With Severe *Clostridium difficile* Infection Outcome.  
15           Open Forum Infect Dis. 2020;1–4.
- 16    15.    Freeman J, Neill FJO, Wilcox MH. Effects of cefotaxime and desacetylcefotaxime  
17           upon *Clostridium difficile* proliferation and toxin production in a triple-stage chemostat  
18           model of the human gut. J Antimicrob Chemother. 2003;52:96–102.
- 19    16.    Chilton CH, Crowther GS, Freeman J, Todhunter SL, Nicholson S, Longshaw CM, et  
20           al. Successful treatment of simulated *Clostridium difficile* infection in a human gut  
21           model by fidaxomicin first line and after vancomycin or metronidazole failure. J  
22           Antimicrob Chemother. 2014;69:451–62.
- 23    17.    Crowther GS, Baines SD, Todhunter SL, Freeman J, Chilton CH, Wilcox MH.  
24           Evaluation of NVB302 versus vancomycin activity in an *in vitro* human gut model of

- 1        *Clostridium difficile* infection. J Antimicrob Chemother. 2013;68(1):168–76.
- 2    18.    Saxton K, Baines SD, Freeman J, O'Connor R, Wilcox MH. Effects of exposure of
- 3        *Clostridium difficile* PCR ribotypes 027 and 001 to fluoroquinolones in a human gut
- 4        model. Antimicrob Agents Chemother. 2009;53(2):412–20.
- 5    19.    Baines SD, Freeman J, Wilcox MH. Effects of piperacillin/tazobactam on *Clostridium*
- 6        *difficile* growth and toxin production in a human gut model. J Antimicrob Chemother.
- 7        2005;55(6):974–82.
- 8    20.    Baines SD, Saxton K, Freeman J, Wilcox MH. Tigecycline does not induce
- 9        proliferation or cytotoxin production by epidemic *Clostridium difficile* strains in a
- 10       human gut model. J Antimicrob Chemother. 2006;58(5):1062–5.
- 11   21.    Swanson RN, Hardy DJ, Shipkowitz NL, Hanson CW, Ramer NC, Fernandes PB, et
- 12       al. *In vitro* and *in vivo* evaluation of tiacumicins B and C against *Clostridium difficile*.
- 13       Antimicrob Agents Chemother. 1991;35(6):1108–11.
- 14   22.    Crook DW, Sarah Walker A, Kean Y, Weiss K, Cornely OA, Miller MA, et al.
- 15       Fidaxomicin versus vancomycin for *Clostridium difficile* infection: Meta-analysis of
- 16       pivotal randomized controlled trials. Clin Infect Dis. 2012;55(SUPPL.2):93–103.
- 17   23.    Kurtz CB, Cannon EP, Brezzani A, Pitruzzello M, Dinardo C, Rinard E, et al. GT160-
- 18       246, a toxin binding polymer for treatment of *Clostridium difficile* colitis. Antimicrob
- 19       Agents Chemother. 2001;45(8):2340–7.
- 20   24.    Johnson S, Louie TJ, Gerding DN, Cornely OA, Chasan-Taber S, Fitts D, et al.
- 21       Vancomycin, metronidazole, or tolevamer for *Clostridium difficile* infection: Results
- 22       from two multinational, randomized, controlled trials. Clin Infect Dis.
- 23       2014;59(3):345–54.
- 24   25.    Baines SD, Freeman J, Wilcox MH. Tolevamer is not efficacious in the neutralization

- 1 of cytotoxin in a human gut model of *Clostridium difficile* infection. Antimicrob  
2 Agents Chemother. 2009;53(5):2202–4.
- 3 26. Chilton CH, Crowther GS, Baines SD, Todhunter SL, Freeman J, Locher HH, et al. *In*  
4 *vitro* activity of cadazolid against clinically relevant *Clostridium difficile* isolates and  
5 in an *in vitro* gut model of *C. difficile* infection. J Antimicrob Chemother.  
6 2014;69(3):697–705.
- 7 27. Chilton CH, Crowther GS, Todhunter SL, Nicholson S, Freeman J, Chesnel L, et al.  
8 Efficacy of surotomycin in an *in vitro* gut model of *Clostridium difficile* infection. J  
9 Antimicrob Chemother. 2014;69(9):2426–33.
- 10 28. Baines SD, Crowther GS, Freeman J, Todhunter S, Vickers R, Wilcox MH.  
11 SMT19969 as a treatment for *Clostridium difficile* infection: An assessment of  
12 antimicrobial activity using conventional susceptibility testing and an *in vitro* gut  
13 model. J Antimicrob Chemother. 2015;70(1):182–9.
- 14 29. Chilton CH, Crowther GS, Todhunter SL, Ashwin H, Longshaw CM, Karas A, et al.  
15 Efficacy of alternative fidaxomicin dosing regimens for treatment of simulated  
16 *Clostridium difficile* infection in an *in vitro* human gut model. J Antimicrob  
17 Chemother. 2015;70(9):2598–607.
- 18 30. Clinical trials [Internet]. Available from:  
19 <https://clinicaltrials.gov/ct2/show/NCT02254967>
- 20 31. Baines SD, Chilton CH, Crowther GS, Todhunter SL, Freeman J, Wilcox MH.  
21 Evaluation of antimicrobial activity of ceftaroline against *Clostridium difficile* and  
22 propensity to induce *C. difficile* infection in an *in vitro* human gut model. J Antimicrob  
23 Chemother. 2013;68(8):1842–9.
- 24 32. Chilton CH, Freeman J, Crowther GS, Todhunter SL, Nicholson S, Wilcox MH. Co-

- 1 amoxiclav induces proliferation and cytotoxin production of *Clostridium difficile*
- 2 ribotype 027 in a human gut model. J Antimicrob Chemother. 2012;67(4):951–4.
- 3 33. Public Health England. Management of infection guidance for primary care for
- 4 consultation and local adaptation About Public Health England. 2016;1–75.
- 5 34. Abbott PJ, Chen J. WHO food additives series 46: Trehalose [Internet]. Available
- 6 from: <http://www.inchem.org/documents/jecfa/jecmono/v46je05.htm>
- 7 35. Murata T, Yamato I, Kakinuma Y. Structure and Mechanism of Vacuolar Na<sup>+</sup>
- 8 Translocating ATPase From *Enterococcus hirae*. J Bioenerg Biomembr.
- 9 2005;37(6):411–3.
- 10 36. Ley RE, Backhed F, Turnbaugh P, Lozupone CA, Knight RD, Gordon JI. Obesity
- 11 alters gut microbial ecology. Proc Natl Acad Sci. 2005;102(31):11070–5.
- 12 37. Nguyen TLA, Vieira-Silva S, Liston A, Raes J. How informative is the mouse for
- 13 human gut microbiota research? Dis Model Mech. 2015;8:1–16.
- 14 38. Hufeldt MR, Nielsen DS, Vogensen FK, Midtvedt T, Hansen AK. Variation in the Gut
- 15 Microbiota of Laboratory Mice Is Related to Both Genetic and Environmental Factors.
- 16 Comp Med. 2010;60(5):336–42.
- 17 39. Selber-hnativ S, Rukundo B, Ahmadi M, Akoubi H, Baird A, Begum F, et al. Human
- 18 Gut Microbiota: Toward an Ecology of Disease. 2017;8(July).
- 19 40. Rogosa M. The genus Veillonella. J Bacteriol. 1964;87(1):162–70.
- 20 41. Whatmore A, Chudek J, Reed R. The effects of osmotic upshock on the intracellular
- 21 solute pools of *Bacillus subtilis*. J Gen Microbiol. 1990;136:2527–35.
- 22 42. Liu C, Finegold SM, Song Y, Lawson PA. Reclassification of *Clostridium coccoides*,
- 23 *Ruminococcus hansenii*, *Ruminococcus hydrogenotrophicus*, *Ruminococcus luti*,

- 1        *Ruminococcus productus* and *Ruminococcus schinkii* as *Blautia coccoides* gen. nov.,  
2        comb. nov., *Blautia hansenii*. Int J Syst Evol Microbiol. 2008;58:1896–902.
- 3    43.    Zhang Y, DeBosch BJ. Microbial and metabolic impacts of trehalose and trehalose  
4        analogues. Gut Microbes. 2020 Sep 2;11(5):1475–82.
- 5    44.    Chung W, Walker AW, Louis P, Parkhill J, Vermeiren J, Bosscher D, et al.  
6        Modulation of the human gut microbiota by dietary fibres occurs at the species level.  
7        BMC Biol. 2016;14:3.
- 8    45.    Fachi JL, Felipe JDS, Farias A dos S, Varga-weisz P, Vinolo MAR. Butyrate Protects  
9        Mice from *Clostridium difficile* -Induced Colitis through an HIF-1-Dependent  
10       Mechanism. Cell Rep. 2019;27:750–61.
- 11   46.    Khanna S, Montassier E, Schmidt B, Patel R, Knights D, Pardi DS, et al. Gut  
12       microbiome predictors of treatment response and recurrence in primary *Clostridium*  
13       *difficile* infection. Aliment Pharmacol Ther. 2016;44:715–27.
- 14   47.    Roychowdhury S, Cadnum J, Glueck B, Obrenovich M, Donskey C, Cresci GAM, et  
15       al. *Faecalibacterium prausnitzii* and a Prebiotic Protect Intestinal Health in a Mouse  
16       Model of Antibiotic and *Clostridium difficile* Exposure. JPEN J Parenter Enter Nutr.  
17       2018;42(7):1156–67.
- 18   48.    Hsiao A, Ahmed AMS, Subramanian S, Griffin NW, Drewry LL, Jr WAP, et al.  
19       Members of the human gut microbiota involved in recovery from *Vibrio cholerae*  
20       infection. Nature. 2014;515:423.
- 21   49.    Lee ASY, Song KP. LuxS/autoinducer-2 quorum sensing molecule regulates  
22       transcriptional virulence gene expression in *Clostridium difficile*. Biochem Biophys  
23       Res Commun. 2005;335(3):659–66.
- 24   50.    Darkoh C, DuPont HL, Norris SJ, Kaplan HB. Toxin Synthesis by *Clostridium difficile*

- 1 Is Regulated through Quorum Signaling. MBio. 2015;6(2):e02569-14.
- 2 51. Reeves AE, Theriot CM, Bergin IL, Huffnagle GB, Schloss PD, Young VB. The  
3 interplay between microbiome dynamics and pathogen dynamics in a murine model of  
4 *Clostridium difficile* infection. Gut Microbes. 2011;2(3):145–58.
- 5 52. Petrof EO, Gloor GB, Vanner SJ, Weese SJ, Carter D, Daigneault MC, et al. Stool  
6 substitute transplant therapy for the eradication of *Clostridium difficile* infection:  
7 ‘RePOOPulating’ the gut. Microbiome. 2013;1:1–12.
- 8 53. Milani C, Ticinesi A, Gerritsen J, Nouvenne A, Andrea Lugli G, Mancabelli L, et al.  
9 Gut microbiota composition and *Clostridium difficile* infection in hospitalized elderly  
10 individuals: A metagenomic study. Sci Rep. 2016;6(March):1–12.
- 11 54. Hryckowian AJ, Treuren W Van, Smits SA, Davis NM, Gardner JO, Bouley DM, et al.  
12 Microbiota-accessible carbohydrates suppress *Clostridium difficile* infection in a  
13 murine model. Nat Microbiol. 2018;
- 14 55. Jain NK, Roy I. Effect of trehalose on protein structure. Protein Sci. 2009;18:24–36.
- 15 56. Daquigan N, Seekatz AM, Greathouse KL, Young VB, White JR. High-resolution  
16 profiling of the gut microbiome reveals the extent of *Clostridium difficile* burden. npj  
17 Biofilms Microbiomes. 2017;35:1–8.
- 18 57. Girinathan B, Dibenedetto N, Worley J, Peltier J, Lavin R, Delaney D, et al. The  
19 mechanisms of *in vivo* commensal control of *Clostridioides difficile* virulence.  
20 BioRxiv. 2020;
- 21 58. Bouillaut L, Self WT, Sonenshein AL. Proline-dependent regulation of *Clostridium*  
22 *difficile* stickland metabolism. J Bacteriol. 2013;195(4):844–54.
- 23 59. Hofmann JD, Otto A, Berges M, Biedendieck R, Michel A, Becher D, et al. Metabolic

- 1        Reprogramming of *Clostridioides difficile* During the Stationary Phase With the
- 2        Induction of Toxin Production. Front Microbiol. 2018;9:1970.
- 3    60.    Jenior ML, Leslie JL, Young VB, Schloss PD. *Clostridium difficile* Colonizes
- 4        Alternative Nutrient Niches during Infection across Distinct Murine Gut Microbiomes.
- 5        mSystems. 2017;2(4).
- 6    61.    Moura IB, Buckley AM, Ewin D, Shearman S, Clark E, Wilcox MH, et al.
- 7        Omadacycline Gut Microbiome Exposure Does Not Induce *Clostridium difficile*
- 8        Proliferation or Toxin Production in a model that simulates the proximal, medial, and
- 9        distal human colon. Antimicrob Agents Chemother. 2019;63(2):1–11.
- 10   62.    Buckley AM, Spencer J, Candlish D, Irvine JJ, Douce GR. Infection of hamsters with
- 11        the UK *Clostridium difficile* ribotype 027 outbreak strain R20291. J Med Microbiol.
- 12        2011;60(8):1174–80.
- 13   63.    Martin M. Cutadapt removes adapter sequences from high-throughput sequencing
- 14        reads. EMBnet.journal. 2011;17(1):10.
- 15   64.    Schloss PD, Westcott SL, Ryabin T, Hall JR, Hartmann M, Hollister EB, et al.
- 16        Introducing mothur: Open-source, platform-independent, community-supported
- 17        software for describing and comparing microbial communities. Appl Environ
- 18        Microbiol. 2009;75(23):7537–41.
- 19   65.    Rognes T, Flouri T, Nichols B, Quince C, Mahé F. VSEARCH: a versatile open source
- 20        tool for metagenomics. PeerJ. 2016;4:e2584.
- 21   66.    Huson DH, Beier S, Flade I, Górski A, El-Hadidi M, Mitra S, et al. MEGAN
- 22        Community Edition - Interactive Exploration and Analysis of Large-Scale Microbiome
- 23        Sequencing Data. PLoS Comput Biol. 2016;12(6):1–12.
- 24   67.    Buchfink B, Xie C, Huson DH. Fast and sensitive protein alignment using



- 1 DIAMOND. Nat Methods. 2014;12(1):59–60.
- 2 68. Kal AJ, Zonneveld AJ Van, Benes V, Berg M Van Den, Koerkamp MG, Albermann
- 3 K, et al. Dynamics of Gene Expression Revealed by Comparison of Serial Analysis of
- 4 Gene Expression Different Carbon Sources. Mol Biol Cell. 1999;10(June):1859–72.
- 5

# 1 **Figure legends**

2 **Figure 1. Schematic timeline of the *in vitro* triple vessel chemostat gut model and**  
3 **experimental design for each model.** *C. difficile* spores (black lines) were instilled and  
4 commencement of sugar regimen [either trehalose (T), glucose (G) or saline (S) (green  
5 arrow)] before addition of antibiotics (blue arrow). Microbial populations were monitored  
6 post antibiotic for recovery and induction of CDI. Numbers in italicise brackets denotes the  
7 day that samples for DNA extraction were taken.

8 **Figure 2. Taxonomic analysis of the faecal donors, pooled slurry and the steady state**  
9 **from the three individual models.** Principal coordinate analysis of the five donors and the  
10 faecal slurry based on 16S rRNA sequencing (A). Bacterial family abundance (%) found  
11 within the pooled faecal slurry used to initiate all models (B) and at end of steady state period  
12 (experimental day 14) from the three models (G, T and S) (C).

13 **Figure 3. Detection of glucose (A) and trehalose (B) in the gut models.** Sugar  
14 concentrations from model T (blue lines), G (green lines), and S (red lines) were detected by  
15 ion chromatography. Results are shown as mean  $\pm$  S.D of three technical replicates. Sugar  
16 duration and clindamycin dosing are indicated by the top green and blue arrows, respectively.

17 **Figure 4. Microbiome changes throughout the model timeline after supplementation**  
18 **with either trehalose (model T; A), glucose (model G; B) or saline (model S; C).** Upper  
19 line graphs represent diversity changes, as measured by Shannon Diversity Index, throughout  
20 the timeline. Results are shown as mean  $\pm$  S.D of four technical replicates analysed by 16S  
21 rRNA sequencing. Lower stacked bar charts represent the bacterial taxonomical abundance  
22 changes in each model over time. Results are shown as mean  $\pm$  S.D of four technical  
23 replicates analysed by 16S rRNA sequencing.

24 **Figure 5. Recovery of *C. difficile* from model S, (A), model G, (B) and model T (C).**  
25 Recovery of the total *C. difficile* populations (red lines) and the spore populations (blue lines)

1 from vessel 3 are shown for each model. Spore germination and outgrowth was determined  
 2 by a divergence between the red and blue lines. The detection of toxin is represented by  
 3 orange arrows; there is no orange arrow for model T as no toxin was detected. Results  
 4 expressed as mean  $\pm$  SD from three technical replicates. CD spores denotes when the *C.*  
 5 *difficile* spores were inoculated into the model. Blue arrow denotes when clindamycin was  
 6 instilled into the models.

7 **Figure 6. Differential abundance analysis (fold-change) of metabolic pathways in model**  
 8 **T compared to models G (solid bars) and S (hatched bars) at day 38, based on**  
 9 **metagenomics analysis.** Abundance bars highlight the KEGG metabolic pathways (A) or  
 10 KEGG cell surface components (B) that are significantly ( $p < 0.05$ ) more abundant ( $> 1.5$   
 11 fold-change) or less abundant ( $> 1.5$  fold-change) in model T. Pathways or components were  
 12 only included where 80% of the genetic elements in that pathway/component showed an  
 13 increased or decreased abundance from technical replicates of model T compared to both  
 14 models G and S.

15

1 **Table 1. Differential abundance analysis of model T, compared to models G and S, at day 38**

| Population name <sup>a</sup>          | Log <sub>2</sub> fold change <sup>b</sup> |             |
|---------------------------------------|-------------------------------------------|-------------|
|                                       | vs. Model G                               | vs. Model S |
| <i>s_Bacteroides uniformis</i>        | -15.24                                    | -15.14      |
| <i>s_Faecalibacterium prausnitzii</i> | -15.07                                    | -14.97      |
| <i>s_Finegoldia magna</i>             | -14.92                                    | -14.82      |
| <i>s_Blautia obeum</i>                | -14.81                                    | -14.71      |
| <i>s_Dorea formicigenerans</i>        | -14.57                                    | -14.47      |
| <i>s_Lactobacillus rhamnosus</i>      | -12.35                                    | -12.25      |
| <i>s_Oscillibacter ruminantium</i>    | -2.61                                     | -19.61      |
| <i>s_Hungatella hathewayi</i>         | 18.22                                     | 16.8        |
| <i>s_Clostridium symbiosum</i>        | 17.12                                     | 18.08       |
| <i>s_Klebsiella aerogenes</i>         | 17.05                                     | 16.72       |
| <i>s_Blautia producta</i>             | 15.51                                     | 16.06       |
| <i>s_Clostridium clostridioforme</i>  | 15.30                                     | 16.43       |
| <i>s_Enterococcus faecalis</i>        | 3.4                                       | 3.59        |
| <i>s_Klebsiella pneumoniae</i>        | 3.18                                      | 2.27        |
| <i>s_Clostridium citroniae</i>        | 3.05                                      | 2.57        |
| <i>g_Pantoea</i>                      | -14.91                                    | -14.81      |
| <i>g_Erysipelatoclostridium</i>       | -14.83                                    | -14.73      |
| <i>g_Cronobacter</i>                  | -14.55                                    | -14.45      |
| <i>g_Eubacterium</i>                  | -14.45                                    | -14.36      |
| <i>g_Xanthomonas</i>                  | -14.38                                    | -14.28      |
| <i>g_Paraprevotella</i>               | -14.34                                    | -14.24      |
| <i>g_Ochrobactrum</i>                 | -12.52                                    | -12.42      |
| <i>g_Phascolarctobacterium</i>        | 20.06                                     | 19.12       |
| <i>g_Clostridium</i>                  | 15.98                                     | 16.47       |
| <i>f_Peptoniphilaceae</i>             | -12.44                                    | -12.34      |

<sup>a</sup> Taxonomic level of microbial populations from whole genome sequencing data. s\_ species, g\_ genus or f\_ family.

<sup>b</sup> Log<sub>2</sub> fold change compared with model T, i.e. a positive number (red) indicates microbial population was significantly (FDR  $p \leq 0.01$ ) less abundant in model T compared with models G and S, whilst a negative number (green) indicates microbial population was significantly (FDR  $p \leq 0.01$ ) more abundant in model T.

2

3

1 *Figure 1*

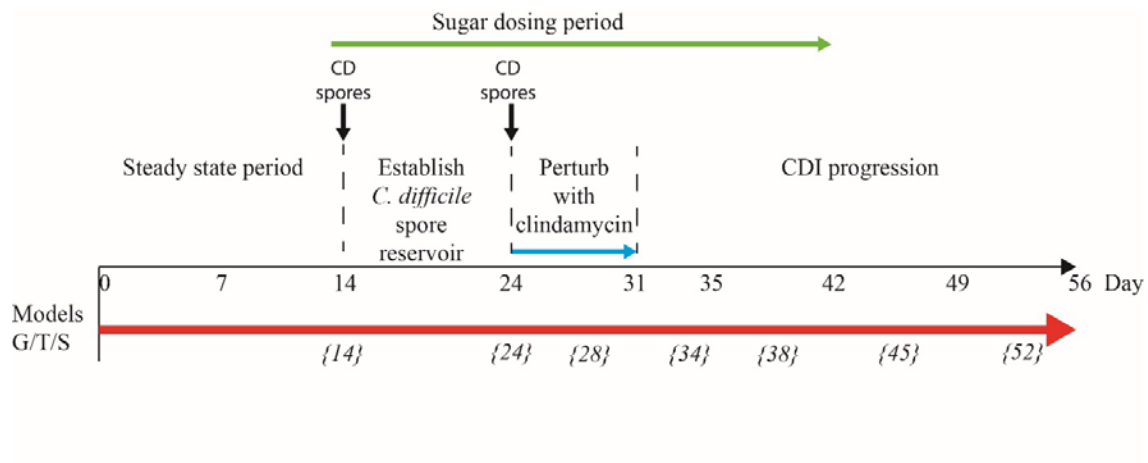

2

3

1 *Figure 2*

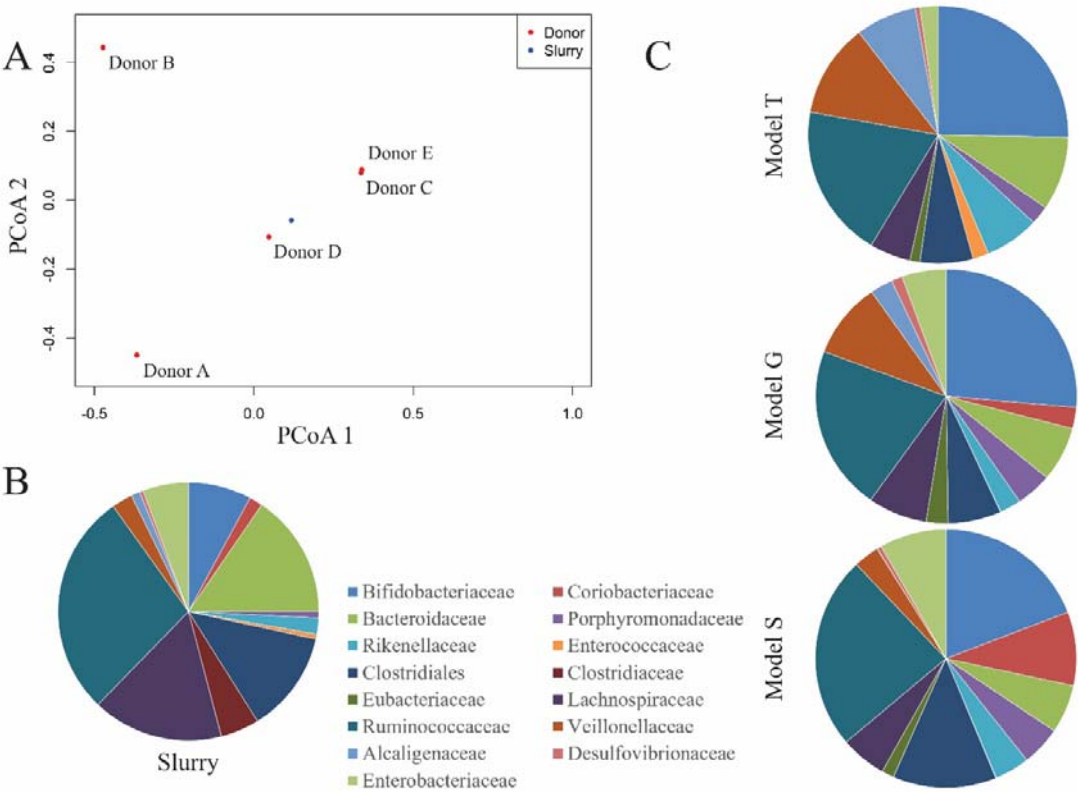

2

3

1 *Figure 3*

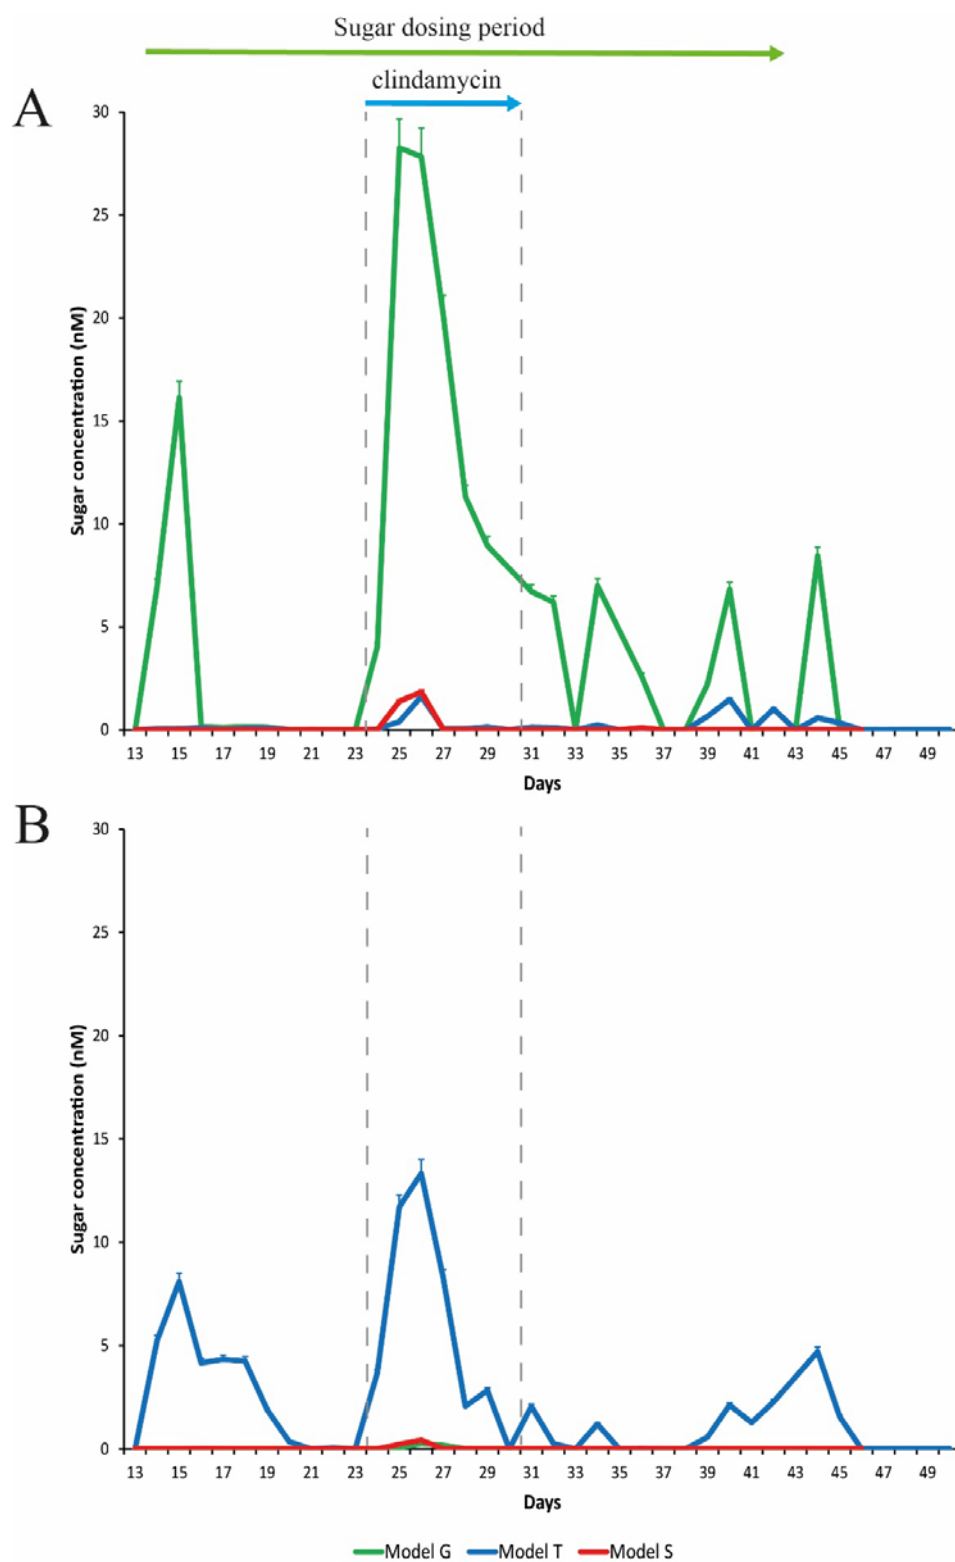

2  
3



1 *Figure 4*

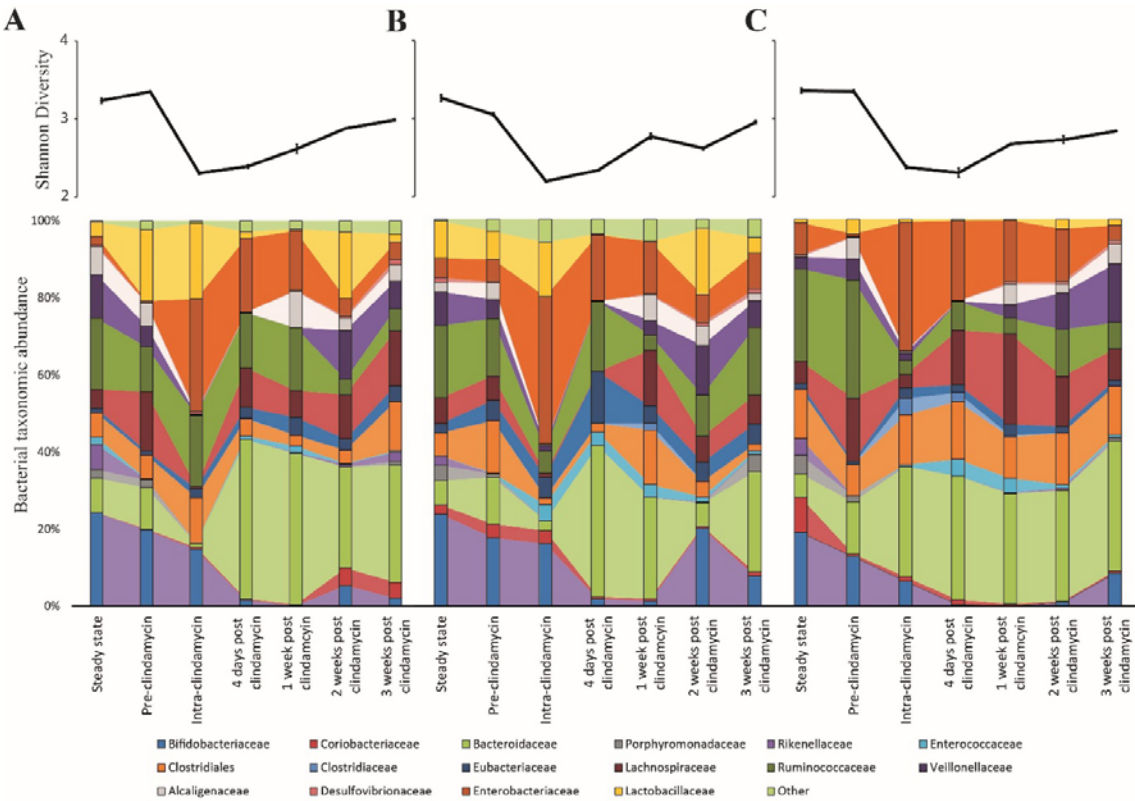

1 *Figure 5*

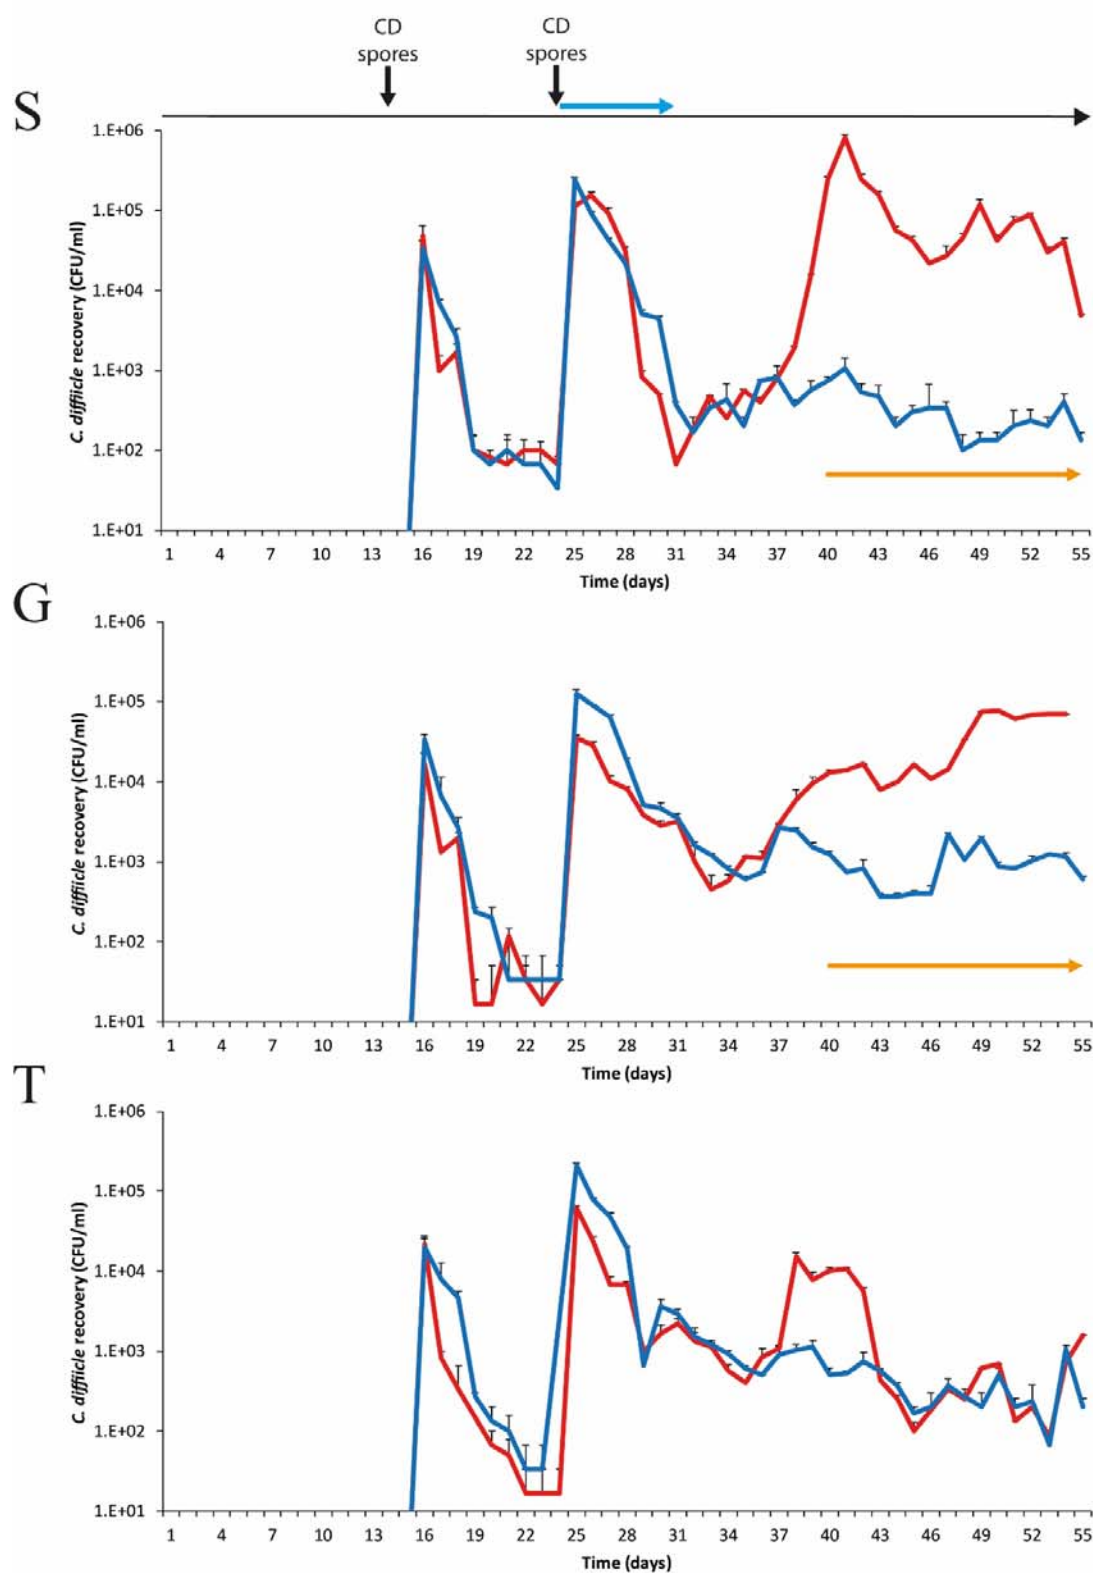

2

3

1 *Figure 6*

# A - Metabolic changes

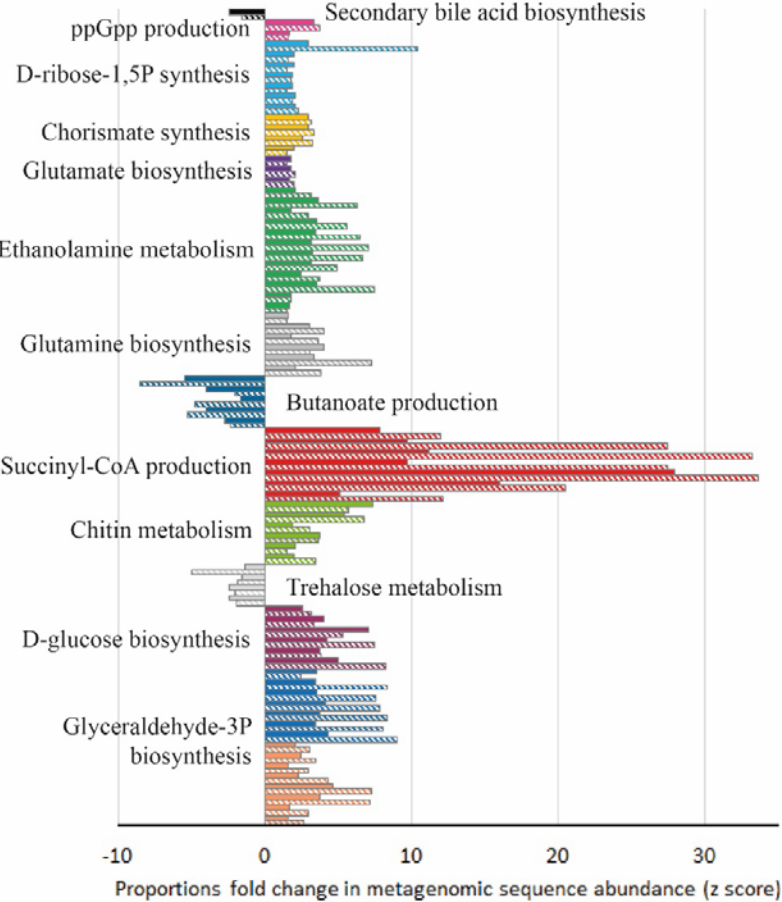

# B - Cell surface changes

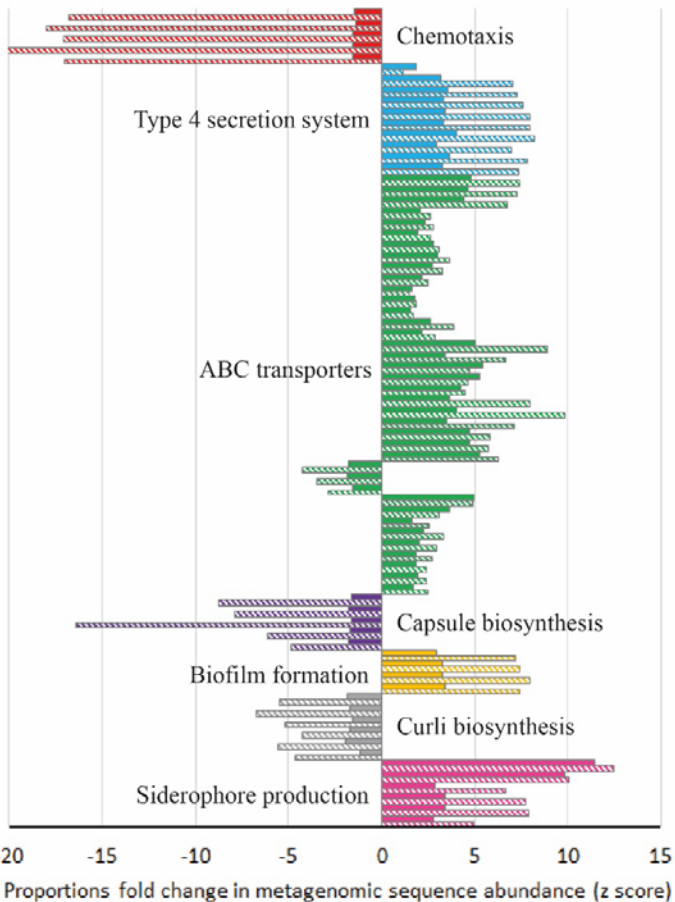

2
