# Supplementary material for: Pilot study: Trehalose-induced remodelling of the human microbiota affects Clostridioides difficile infection outcome in an in vitro colonic model
Source: bioRxiv preprint, doi:10.1101/2021.02.16.431513, version 1 (2021-02-16)
Supplement: Supplementary Table 3 [file 431513_file04.pdf]

| #Datasets                                                                                                          | Saline model |         |         |         | Trehalose model |         |         |         | Glucose model |         |         |         |
|--------------------------------------------------------------------------------------------------------------------|--------------|---------|---------|---------|-----------------|---------|---------|---------|---------------|---------|---------|---------|
|                                                                                                                    | SA D38       | SB D38  | SC D38  | SD D38  | TA D38          | TB D38  | TC D38  | TD D38  | GA D38        | GB D38  | GC D38  | GD D38  |
| KEGG                                                                                                               | 9253574      | 9230269 | 9114938 | 9229998 | 8411070         | 8468258 | 8365147 | 8417468 | 8612545       | 8645575 | 8550853 | 8644083 |
| Metabolism                                                                                                         | 3324452      | 3323200 | 3279165 | 3319148 | 3197007         | 3210979 | 3186753 | 3196959 | 3255493       | 3256410 | 3228229 | 3257346 |
| Carbohydrate metabolism                                                                                            | 1110504      | 1115680 | 1106843 | 1118697 | 1179116         | 1186477 | 1181704 | 1176146 | 1229890       | 1238874 | 1228443 | 1236169 |
| ko00010 Glycolysis / Gluconeogenesis                                                                               | 173787       | 174835  | 172940  | 174648  | 172844          | 175917  | 173790  | 173529  | 184557        | 186962  | 184294  | 185290  |
| K00001 alcohol dehydrogenase [EC:1.1.1.1]                                                                          | 1456         | 1456    | 1473    | 1402    | 1185            | 1259    | 1208    | 1141    | 1839          | 1925    | 1870    | 1902    |
| K00002 alcohol dehydrogenase (NADP+) [EC:1.1.1.2]                                                                  | 174          | 169     | 149     | 148     | 43              | 37      | 52      | 65      | 306           | 308     | 336     | 335     |
| K00016 l-lactate dehydrogenase [EC:1.1.1.27]                                                                       | 1548         | 1452    | 1512    | 1681    | 610             | 687     | 665     | 615     | 1685          | 1888    | 1825    | 1772    |
| K00114 alcohol dehydrogenase (cytochrome c) [EC:1.1.2.8]                                                           | 2545         | 2673    | 2492    | 2486    | 1293            | 1237    | 1225    | 1497    | 867           | 813     | 764     | 751     |
| K00121 5-(hydroxymethyl)glutathione dehydrogenase / alcohol dehydrogenase [EC:1.1.1.284 1.1.1.1]                   | 2258         | 2350    | 2107    | 2222    | 1410            | 1419    | 1333    | 1335    | 1558          | 1506    | 1505    | 1497    |
| K00128 aldehyde dehydrogenase (NAD+) [EC:1.2.1.3]                                                                  | 5102         | 5084    | 4807    | 4818    | 3106            | 2867    | 2785    | 3017    | 1916          | 1754    | 1686    | 1825    |
| K00129 aldehyde dehydrogenase (NAD(P)+) [EC:1.2.1.5]                                                               | 16           | 16      | 10      | 10      | 14              | 12      | 15      | 10      | 3             | 4       | 6       | 4       |
| K00131 glyceraldehyde-3-phosphate dehydrogenase (NADP+) [EC:1.2.1.9]                                               | 2124         | 2160    | 1918    | 2096    | 1063            | 1014    | 920     | 1156    | 658           | 722     | 700     | 712     |
| K00134 glyceraldehyde 3-phosphate dehydrogenase [EC:1.2.1.12]                                                      | 6507         | 6759    | 6631    | 6623    | 5652            | 5731    | 5693    | 5624    | 5233          | 5374    | 5245    | 5450    |
| K00138 aldehyde dehydrogenase [EC:1.2.1.-]                                                                         | 4815         | 4669    | 4149    | 4632    | 2677            | 2513    | 2491    | 2640    | 2411          | 2391    | 2308    | 2483    |
| K00149 aldehyde dehydrogenase family 9 member A1 [EC:1.2.1.47 1.2.1.3]                                             | 1            | 1       | 0       | 0       | 0               | 0       | 0       | 0       | 0             | 0       | 0       | 0       |
| K00150 glyceraldehyde-3-phosphate dehydrogenase (NAD(P)) [EC:1.2.1.59]                                             | 0            | 2       | 2       | 1       | 0               | 3       | 2       | 3       | 4             | 12      | 6       | 13      |
| K00161 pyruvate dehydrogenase E1 component alpha subunit [EC:1.2.4.1]                                              | 1703         | 1663    | 1418    | 1432    | 800             | 804     | 841     | 919     | 537           | 508     | 532     | 580     |
| K00162 pyruvate dehydrogenase E1 component beta subunit [EC:1.2.4.1]                                               | 1648         | 1616    | 1373    | 1463    | 827             | 781     | 798     | 906     | 569           | 462     | 495     | 495     |
| K00163 pyruvate dehydrogenase E1 component [EC:1.2.4.1]                                                            | 3440         | 3384    | 3516    | 3516    | 2237            | 2394    | 2149    | 2183    | 2815          | 3102    | 2675    | 2964    |
| K00169 pyruvate ferredoxin oxidoreductase alpha subunit [EC:1.2.7.1]                                               | 216          | 258     | 255     | 233     | 319             | 373     | 370     | 340     | 472           | 523     | 516     | 565     |
| K00170 pyruvate ferredoxin oxidoreductase beta subunit [EC:1.2.7.1]                                                | 87           | 91      | 115     | 86      | 271             | 291     | 310     | 317     | 194           | 186     | 215     | 227     |
| K00171 pyruvate ferredoxin oxidoreductase delta subunit [EC:1.2.7.1]                                               | 5            | 16      | 4       | 7       | 66              | 59      | 58      | 50      | 24            | 29      | 38      | 34      |
| K00172 pyruvate ferredoxin oxidoreductase gamma subunit [EC:1.2.7.1]                                               | 92           | 139     | 139     | 122     | 156             | 171     | 181     | 166     | 270           | 280     | 293     | 294     |
| K00174 2-oxoglutarate/2-oxoacid ferredoxin oxidoreductase subunit alpha [EC:1.2.7.3 1.2.7.11]                      | 2742         | 2915    | 3077    | 2864    | 6669            | 6734    | 6879    | 6802    | 5579          | 5516    | 5922    | 5513    |
| K00175 2-oxoglutarate/2-oxoacid ferredoxin oxidoreductase subunit beta [EC:1.2.7.3 1.2.7.11]                       | 1687         | 1853    | 2015    | 1903    | 4182            | 4181    | 4270    | 4209    | 3671          | 3591    | 3674    | 3509    |
| K00382 dihydropyrimidine dehydrogenase [EC:1.8.1.4]                                                                | 9170         | 9150    | 8930    | 9118    | 9722            | 9692    | 9339    | 9543    | 8930          | 8583    | 8861    | 8866    |
| K00627 pyruvate dehydrogenase E2 component (dihydrolipoamide acetyltransferase) [EC:2.3.1.12]                      | 5358         | 5056    | 4803    | 4842    | 2778            | 2862    | 2887    | 3162    | 3520          | 3384    | 3306    | 3636    |
| K00844 hexokinase [EC:2.7.1.1]                                                                                     | 664          | 727     | 715     | 699     | 2558            | 2621    | 2670    | 2708    | 1967          | 1805    | 2044    | 1925    |
| K00845 glucokinase [EC:2.7.1.2]                                                                                    | 4977         | 5043    | 5103    | 5062    | 7634            | 7716    | 7883    | 7923    | 7174          | 7422    | 7334    | 7363    |
| K00850 6-phosphofructokinase 1 [EC:2.7.1.11]                                                                       | 2702         | 2797    | 2789    | 2795    | 3416            | 3618    | 3575    | 3393    | 3769          | 3840    | 3773    | 3818    |
| K00873 pyruvate kinase [EC:2.7.1.40]                                                                               | 7147         | 7129    | 7132    | 6836    | 6764            | 6674    | 6742    | 6952    | 7200          | 6971    | 7122    | 6903    |
| K00886 polyphosphate glucokinase [EC:2.7.1.63]                                                                     | 2            | 2       | 2       | 3       | 2               | 0       | 0       | 0       | 8             | 3       | 13      | 9       |
| K00895 diphosphate-dependent phosphofructokinase [EC:2.7.1.90]                                                     | 937          | 1130    | 1188    | 1108    | 3502            | 3491    | 3555    | 3299    | 2447          | 2397    | 2481    | 2285    |
| K00918 ADP-dependent phosphofructokinase/glucokinase [EC:2.7.1.146 2.7.1.147]                                      | 8            | 4       | 1       | 2       | 13              | 16      | 3       | 9       | 31            | 33      | 26      | 20      |
| K00927 phosphoglycerate kinase [EC:2.7.2.3]                                                                        | 1458         | 4471    | 4418    | 4463    | 4657            | 4921    | 4595    | 4509    | 4638          | 4537    | 4454    | 4548    |
| K01085 glucose-1-phosphatase [EC:3.1.3.10]                                                                         | 761          | 684     | 690     | 750     | 471             | 485     | 500     | 421     | 969           | 1082    | 956     | 998     |
| K01086 fructose-1,6-bisphosphatase I / sedoheptulose-1,7-bisphosphatase [EC:3.1.3.11 3.1.3.37]                     | 1            | 1       | 0       | 1       | 2               | 0       | 0       | 0       | 0             | 0       | 2       | 1       |
| K01222 6-phospho-beta-glucosidase [EC:3.2.1.86]                                                                    | 2574         | 2700    | 2428    | 2620    | 978             | 1072    | 1015    | 963     | 4405          | 4885    | 4587    | 4583    |
| K01223 6-phospho-beta-glucosidase [EC:3.2.1.86]                                                                    | 8415         | 8540    | 8261    | 8631    | 5678            | 6061    | 5781    | 5438    | 9521          | 10202   | 9329    | 10037   |
| K01596 phosphoenolpyruvate carboxykinase (GTP) [EC:4.1.1.32]                                                       | 36           | 22      | 30      | 21      | 43              | 23      | 42      | 31      | 45            | 20      | 34      | 38      |
| K01610 phosphoenolpyruvate carboxykinase (ATP) [EC:4.1.1.49]                                                       | 6524         | 6393    | 6680    | 6622    | 6704            | 6697    | 6816    | 6676    | 7149          | 7323    | 7398    | 7118    |
| K01622 fructose 1,6-bisphosphate aldolase/phosphatase [EC:4.1.2.13 3.1.3.11]                                       | 2            | 0       | 0       | 0       | 1               | 4       | 0       | 0       | 2             | 13      | 3       | 7       |
| K01623 fructose-bisphosphate aldolase, class I [EC:4.1.2.13]                                                       | 167          | 167     | 157     | 154     | 32              | 55      | 55      | 37      | 349           | 303     | 338     | 327     |
| K01624 fructose-bisphosphate aldolase, class II [EC:4.1.2.13]                                                      | 6833         | 6723    | 6594    | 6717    | 5602            | 5734    | 5627    | 5650    | 6507          | 7002    | 6741    | 6911    |
| K01689 enolase [EC:4.2.1.11]                                                                                       | 4355         | 4359    | 4446    | 4327    | 5171            | 5542    | 5258    | 5229    | 4613          | 4407    | 4462    | 4639    |
| K01785 aldose 1-epimerase [EC:5.1.3.3]                                                                             | 3982         | 4387    | 4311    | 4359    | 8224            | 8264    | 8357    | 8134    | 7455          | 7509    | 7425    | 7157    |
| K01792 glucose-6-phosphate 1-epimerase [EC:5.1.3.15]                                                               | 2168         | 2177    | 2047    | 2169    | 1293            | 1220    | 1206    | 1401    | 1221          | 1232    | 1200    | 1285    |
| K01803 triosephosphate isomerase (TIM) [EC:5.3.1.5]                                                                | 3258         | 3528    | 3483    | 3510    | 3358            | 3562    | 3401    | 3364    | 3850          | 3893    | 3906    | 3869    |
| K01810 glucose-6-phosphate isomerase [EC:5.3.1.9]                                                                  | 5895         | 5831    | 6010    | 5964    | 5767            | 5779    | 5575    | 5595    | 5661          | 5601    | 5546    | 5744    |
| K01834 2,3-bisphosphoglycerate-dependent phosphoglycerate mutase [EC:5.4.2.11]                                     | 1383         | 1365    | 1451    | 1352    | 2251            | 2339    | 2237    | 2282    | 2061          | 2089    | 2085    | 1930    |
| K01835 phosphoglucomutase [EC:5.4.2.2]                                                                             | 3966         | 3823    | 3976    | 4107    | 4928            | 5010    | 5112    | 4791    | 5614          | 5460    | 5373    | 5604    |
| K01895 acetyl-CoA synthetase [EC:6.2.1.1]                                                                          | 7843         | 7868    | 7754    | 7877    | 7723            | 7669    | 7743    | 7792    | 6178          | 6178    | 6273    | 6256    |
| K01905 acetate---CoA ligase (ADP-forming) subunit alpha [EC:6.2.1.13]                                              | 13           | 20      | 12      | 8       | 0               | 0       | 0       | 0       | 0             | 3       | 0       | 0       |
| K02446 fructose-1,6-bisphosphatase II [EC:3.1.3.11]                                                                | 726          | 766     | 654     | 713     | 479             | 511     | 581     | 482     | 1109          | 1037    | 1015    | 1030    |
| K02752 PTS system, beta-glucoside (arbutin/salicin/cellobiose)-specific IIB component [EC:2.7.1.-]                 | 926          | 959     | 888     | 953     | 611             | 676     | 593     | 607     | 1247          | 1241    | 1232    | 1296    |
| K02777 PTS system, sugar-specific IIA component [EC:2.7.1.-]                                                       | 594          | 593     | 591     | 628     | 237             | 312     | 232     | 257     | 595           | 690     | 650     | 643     |
| K02778 PTS system, glucose-specific IIB component [EC:2.7.1.199]                                                   | 135          | 148     | 151     | 171     | 98              | 119     | 110     | 112     | 192           | 195     | 170     | 180     |
| K02797 PTS system, glucose-specific IIC component [EC:2.7.1.199 2.7.1.208]                                         | 901          | 892     | 919     | 939     | 549             | 632     | 604     | 624     | 1247          | 1329    | 1351    | 1264    |
| K02907 PTS system, maltose/glucose-specific IIB component [EC:2.7.1.199 2.7.1.208]                                 | 1360         | 1290    | 1245    | 1307    | 1098            | 1058    | 1100    | 1159    | 1403          | 1413    | 1351    | 1547    |
| K02791 PTS system, maltose/glucose-specific IIC component                                                          | 0            | 0       | 0       | 0       | 0               | 1       | 0       | 0       | 0             | 0       | 0       | 0       |
| K03737 pyruvate-ferredoxin/flavodoxin oxidoreductase [EC:1.2.7.1 1.2.7.-]                                          | 7665         | 7761    | 7814    | 8173    | 8670            | 9001    | 8957    | 8852    | 11378         | 12075   | 11511   | 11442   |
| K03841 fructose-1,6-bisphosphatase I [EC:3.1.3.11]                                                                 | 2218         | 2283    | 2214    | 2256    | 1383            | 1537    | 1396    | 1412    | 1620          | 1579    | 1627    | 1562    |
| K04022 alcohol dehydrogenase                                                                                       | 497          | 448     | 424     | 491     | 151             | 116     | 141     | 148     | 1108          | 973     | 1036    | 1071    |
| K04041 fructose-1,6-bisphosphatase III [EC:3.1.3.11]                                                               | 2186         | 2438    | 2585    | 2428    | 3966            | 4037    | 4107    | 3867    | 3809          | 3871    | 3716    | 3695    |
| K04072 acetaldehyde dehydrogenase / alcohol dehydrogenase [EC:1.2.1.10 1.1.1.1]                                    | 2747         | 2670    | 2860    | 2783    | 1272            | 1265    | 1220    | 1306    | 3039          | 3274    | 3244    | 3201    |
| K06859 glucose-6-phosphate isomerase, archaeal [EC:5.3.1.9]                                                        | 8            | 10      | 14      | 10      | 8               | 9       | 12      | 4       | 39            | 56      | 39      | 53      |
| K10705 glyceraldehyde-3-phosphate dehydrogenase, spermatogenic [EC:1.2.1.12]                                       | 1            | 1       | 0       | 0       | 0               | 0       | 0       | 0       | 0             | 0       | 0       | 0       |
| K11532 fructose-1,6-bisphosphatase II / sedoheptulose-1,7-bisphosphatase [EC:3.1.3.11 3.1.3.37]                    | 0            | 0       | 0       | 1       | 3               | 0       | 1       | 0       | 0             | 6       | 5       | 1       |
| K11645 fructose-bisphosphate aldolase, class I [EC:4.1.2.13]                                                       | 1631         | 1712    | 1832    | 1694    | 2982            | 3093    | 3088    | 2932    | 3033          | 3160    | 3008    | 3063    |
| K13953 alcohol dehydrogenase, propanol-prefering [EC:1.1.1.1]                                                      | 2060         | 2096    | 1985    | 1950    | 996             | 973     | 1021    | 1096    | 1236          | 1286    | 1235    | 1182    |
| K13954 alcohol dehydrogenase [EC:1.1.1.1]                                                                          | 1899         | 1895    | 2188    | 2184    | 1270            | 1379    | 1287    | 1201    | 753           | 881     | 795     | 743     |
| K14085 aldehyde dehydrogenase family 7 member A1 [EC:1.2.1.31 1.2.1.8 1.2.1.3]                                     | 0            | 0       | 0       | 0       | 0               | 1       | 0       | 0       | 0             | 0       | 0       | 0       |
| K15633 2,3-bisphosphoglycerate-independent phosphoglycerate mutase [EC:5.4.2.12]                                   | 5655         | 5458    | 5484    | 5488    | 6065            | 6093    | 5980    | 5951    | 5807          | 5664    | 5764    | 5463    |
| K15634 probable phosphoglycerate mutase [EC:5.4.2.12]                                                              | 581          | 573     | 549     | 581     | 486             | 515     | 441     | 490     | 569           | 634     | 616     | 651     |
| K15675 2,3-bisphosphoglycerate-independent phosphoglycerate mutase [EC:5.4.2.12]                                   | 1007         | 1018    | 1124    | 1052    | 2695            | 2757    | 2840    | 2675    | 2412          | 2236    | 2357    | 2276    |
| K15778 phosphomannomutase / phosphoglucomutase [EC:5.4.2.8 5.4.2.2]                                                | 4256         | 4121    | 4159    | 4126    | 2399            | 2347    | 2312    | 2521    | 1575          | 1409    | 1453    | 1439    |
| K16306 fructose-bisphosphate aldolase 2 / amino-3,7-dideoxy-D-threo-hept-6-ulonate synthase [EC:4.1.2.13 2.2.1.10] | 2            | 0       | 0       | 0       | 1               | 0       | 0       | 3       | 0             | 7       | 6       | 7       |
| K16370 6-phosphofructokinase 2 [EC:2.7.1.11]                                                                       | 570          | 526     | 436     | 508     | 372             | 357     | 384     | 374     | 714           | 786     | 704     | 752     |
| K02118 PTS system, glucose-specific IIC component                                                                  | 399          | 375     | 347     | 366     | 460             | 538     | 469     | 488     | 279           | 298     | 251     | 310     |
| K02066 glucose-1-phosphatase [EC:3.1.3.10]                                                                         | 783          | 829     | 759     | 788     | 1713            | 1782    | 1660    | 1720    | 1473          | 1526    | 1432    | 1526    |
| K02107 ATP-dependent phosphofructokinase / diphosphate-dependent phosphofructokinase [EC:2.7.1.11 2.7.1.90]        | 2786         | 2764    | 2797    | 2845    | 2883            | 2973    | 2874    | 2780    | 3195          | 3405    | 3320    | 3209    |
| K22224 acetate---CoA ligase (ADP-forming) subunit beta [EC:6.2.1.13]                                               | 369          | 386     | 329     | 350     | 146             | 141     | 158     | 174     | 821           | 861     | 722     | 882     |
| ko00020 Citrate cycle (TCA cycle)                                                                                  | 120604       | 120221  | 119660  | 120947  | 124566          | 126571  | 125497  | 125566  | 128898        | 130185  | 129169  | 129342  |
| K00024 malate dehydrogenase [EC:1.1.1.37]                                                                          | 1872         | 2021    | 2084    | 2002    | 4954            | 4766    | 4938    | 4822    | 4052          | 3976    | 3945    | 3824    |
| K00030 isocitrate dehydrogenase (NAD+) [EC:1.1.1.41]                                                               | 441          | 430     | 420     | 544     | 171             | 197     | 152     | 213     | 1001          | 1063    | 1071    | 1111    |
| K00031 isocitrate dehydrogenase [EC:1.1.1.42]                                                                      | 5104         | 4863    | 4952    | 5034    | 4691            | 4819    | 4747    | 4729    | 4219          | 4124    | 4277    | 4186    |
| K00116 malate dehydrogenase (quinone) [EC:1.1.5.4                                                                  |              |         |         |         |                 |         |         |         |               |         |         |         |

|                                                                                                                         |       |       |       |       |       |       |       |       |       |       |       |       |
|-------------------------------------------------------------------------------------------------------------------------|-------|-------|-------|-------|-------|-------|-------|-------|-------|-------|-------|-------|
| K00034 glucose 1-dehydrogenase [EC:1.1.1.47]                                                                            | 53    | 53    | 57    | 64    | 19    | 16    | 11    | 12    | 56    | 61    | 77    | 63    |
| K00036 glucose-6-phosphate 1-dehydrogenase [EC:1.1.1.49 1.1.1.363]                                                      | 6901  | 6838  | 6884  | 6843  | 6039  | 6066  | 6001  | 6174  | 5414  | 5131  | 5143  | 5096  |
| K00090 glyoxylate/hydroxypyruvate/2-ketoglutarate reductase [EC:1.1.1.79 1.1.1.81 1.1.1.215]                            | 1733  | 1799  | 1552  | 1736  | 945   | 1062  | 973   | 1020  | 1230  | 1236  | 1198  | 1246  |
| K00117 quinoprotein glucose dehydrogenase [EC:1.1.5.2]                                                                  | 5019  | 4864  | 4748  | 4740  | 3115  | 3347  | 3146  | 3189  | 3047  | 2972  | 2886  | 3127  |
| K00615 transketolase [EC:2.2.1.1]                                                                                       | 13517 | 13414 | 13161 | 13442 | 9604  | 9691  | 9778  | 9303  | 14442 | 14290 | 14105 | 14499 |
| K00616 transaldolase [EC:2.2.1.2]                                                                                       | 2686  | 2810  | 2779  | 2906  | 2831  | 2905  | 3012  | 2917  | 3855  | 3909  | 3806  | 3842  |
| K00851 gluconokinase [EC:2.7.1.12]                                                                                      | 1170  | 1269  | 1332  | 1296  | 801   | 740   | 808   | 797   | 965   | 957   | 924   | 948   |
| K00852 ribokinase [EC:2.7.1.15]                                                                                         | 4636  | 4221  | 4473  | 4477  | 3765  | 3703  | 3574  | 3590  | 4678  | 4839  | 4681  | 4857  |
| K00874 2-dehydro-3-deoxyglucosylconokinase [EC:2.7.1.45]                                                                | 3277  | 3126  | 3415  | 3411  | 3608  | 3636  | 3623  | 3626  | 4248  | 4381  | 4480  | 4464  |
| K00948 ribose-5-phosphate pyrophosphokinase [EC:2.7.6.1]                                                                | 4083  | 4114  | 4036  | 4141  | 3554  | 3612  | 3629  | 3693  | 3819  | 3769  | 3811  | 3656  |
| K01053 glucuronolactonase [EC:3.1.1.17]                                                                                 | 465   | 424   | 429   | 401   | 251   | 335   | 295   | 320   | 137   | 141   | 138   | 131   |
| K01057 6-phosphogluconolactonase [EC:3.1.1.31]                                                                          | 1528  | 1496  | 1478  | 1452  | 1993  | 1981  | 1980  | 2071  | 1380  | 1230  | 1305  | 1215  |
| K01619 deoxyribose-phosphate aldolase [EC:4.1.2.14]                                                                     | 2692  | 2736  | 2571  | 2624  | 2905  | 2980  | 3027  | 2905  | 3748  | 3807  | 3818  | 3705  |
| K01621 xylulose-5-phosphate/fructose-6-phosphate phosphoketolase [EC:4.1.2.9 4.1.2.22]                                  | 154   | 128   | 146   | 120   | 267   | 277   | 259   | 236   | 34    | 79    | 72    | 63    |
| K01625 2-dehydro-3-deoxyphosphogluconate aldolase / (4S)-4-hydroxy-2-oxoglutarate aldolase [EC:4.1.2.14 4.1.3.42]       | 3200  | 3039  | 2905  | 2986  | 2555  | 2647  | 2684  | 2680  | 2467  | 2661  | 2564  | 2611  |
| K01690 phosphogluconate dehydratase [EC:4.2.1.12]                                                                       | 1462  | 1511  | 1427  | 1471  | 908   | 931   | 985   | 990   | 1487  | 1581  | 1470  | 1530  |
| K01783 ribulose-phosphate 3-epimerase [EC:5.3.1.1]                                                                      | 2481  | 2589  | 2754  | 2803  | 2789  | 2882  | 2859  | 2620  | 2624  | 2620  | 2596  | 2576  |
| K01807 ribose 5-phosphate isomerase A [EC:5.3.1.6]                                                                      | 1841  | 1888  | 1900  | 1896  | 2265  | 2129  | 2181  | 2110  | 2164  | 2173  | 2267  | 2216  |
| K01808 ribose 5-phosphate isomerase B [EC:5.3.1.6]                                                                      | 1050  | 1039  | 1018  | 987   | 1233  | 1259  | 1262  | 1241  | 1392  | 1475  | 1373  | 1455  |
| K01839 phosphopentomutase [EC:5.4.2.7]                                                                                  | 1312  | 1341  | 1452  | 1472  | 666   | 636   | 671   | 617   | 1827  | 2075  | 1955  | 2113  |
| K03738 aldehyde:ferredoxin oxidoreductase [EC:1.2.7.5]                                                                  | 212   | 255   | 244   | 232   | 154   | 150   | 151   | 119   | 574   | 691   | 564   | 608   |
| K05308 gluconate/galactonate dehydratase [EC:4.2.1.140]                                                                 | 14    | 12    | 23    | 17    | 4     | 5     | 3     | 4     | 33    | 25    | 30    | 28    |
| K05774 ribose 1,5-bisphosphokinase [EC:2.7.4.23]                                                                        | 1071  | 1081  | 986   | 960   | 533   | 515   | 468   | 569   | 685   | 740   | 723   | 796   |
| K06151 gluconate 2-dehydrogenase alpha chain [EC:1.1.99.3]                                                              | 2832  | 2866  | 2492  | 2813  | 1274  | 1403  | 1317  | 1487  | 1621  | 1595  | 1532  | 1532  |
| K06152 gluconate 2-dehydrogenase gamma chain [EC:1.1.99.3]                                                              | 1222  | 1216  | 1129  | 1190  | 596   | 559   | 491   | 570   | 890   | 923   | 859   | 917   |
| K07404 6-phosphogluconolactonase [EC:3.1.1.31]                                                                          | 1754  | 1878  | 1811  | 1850  | 624   | 756   | 633   | 563   | 1879  | 2100  | 1948  | 1970  |
| K08093 3-hexulose-6-phosphate synthase [EC:4.1.2.43]                                                                    | 3     | 3     | 4     | 3     | 2     | 1     | 0     | 2     | 11    | 16    | 13    | 12    |
| K08094 6-phospho-3-hexuloisomerase [EC:5.3.1.27]                                                                        | 29    | 35    | 19    | 25    | 11    | 5     | 9     | 1     | 70    | 64    | 70    | 68    |
| K11441 dehydrogluconokinase [EC:2.7.1.13]                                                                               | 1184  | 1196  | 1076  | 1135  | 532   | 575   | 550   | 631   | 344   | 304   | 298   | 361   |
| K11529 glycerate 2-kinase [EC:2.7.1.165]                                                                                | 2766  | 2585  | 2489  | 2539  | 1699  | 1718  | 1667  | 1694  | 908   | 854   | 858   | 882   |
| K13812 bifunctional enzyme Fae/Hps [EC:4.2.1.147 4.1.2.43]                                                              | 2     | 0     | 0     | 0     | 0     | 0     | 2     | 2     | 6     | 4     | 2     | 8     |
| K13831 3-hexulose-6-phosphate synthase / 6-phospho-3-hexuloisomerase [EC:4.1.2.43 5.3.1.27]                             | 1     | 1     | 1     | 0     | 0     | 0     | 1     | 0     | 9     | 1     | 3     | 3     |
| K17463 2-dehydro-3-deoxy-phosphogluconate aldolase [EC:4.1.2.14]                                                        | 0     | 0     | 2     | 0     | 0     | 0     | 3     | 0     | 0     | 0     | 2     | 7     |
| K17464 PTS system, D-glucosamine-specific IIA component [EC:2.7.1.203]                                                  | 28    | 32    | 26    | 21    | 8     | 12    | 4     | 2     | 45    | 74    | 49    | 51    |
| K17465 PTS system, D-glucosamine-specific IIB component [EC:2.7.1.203]                                                  | 20    | 31    | 30    | 34    | 1     | 14    | 9     | 14    | 64    | 77    | 70    | 68    |
| K17466 PTS system, D-glucosamine-specific IIC component                                                                 | 76    | 63    | 53    | 59    | 18    | 12    | 5     | 18    | 110   | 84    | 88    | 90    |
| K17467 PTS system, D-glucosamine-specific IID component                                                                 | 56    | 71    | 67    | 64    | 8     | 10    | 9     | 16    | 98    | 106   | 112   | 111   |
| K17468 D-glucosamine-6-phosphate ammonia-lyase [EC:4.3.1.29]                                                            | 0     | 0     | 2     | 0     | 2     | 0     | 2     | 0     | 1     | 0     | 1     | 2     |
| K18022 glyceraldehyde dehydrogenase small subunit [EC:1.2.99.8]                                                         | 0     | 0     | 0     | 0     | 1     | 0     | 0     | 0     | 0     | 0     | 0     | 0     |
| K19813 glucose dehydrogenase [EC:1.1.5.9]                                                                               | 2     | 2     | 0     | 1     | 0     | 0     | 0     | 0     | 0     | 0     | 0     | 0     |
| K22229 2-ketoglucuronate reductase [EC:1.1.1.215]                                                                       | 4     | 2     | 3     | 3     | 3     | 1     | 4     | 3     | 7     | 571   | 463   | 437   |
| K22345 glucosamine ammonia-lyase [EC:4.3.1.9]                                                                           | 1426  | 1463  | 1385  | 1436  | 801   | 818   | 771   | 872   | 571   | 463   | 437   | 450   |
| K00040 Pentose and glucuronate interconversions                                                                         | 67575 | 67509 | 68186 | 69640 | 87052 | 88003 | 88499 | 86556 | 94585 | 95082 | 95426 | 95212 |
| K00007 D-arabinitol 4-dehydrogenase [EC:1.1.1.11]                                                                       | 720   | 748   | 707   | 732   | 535   | 557   | 606   | 561   | 863   | 963   | 910   | 905   |
| K00008 D-iditol 2-dehydrogenase [EC:1.1.1.14]                                                                           | 1003  | 1060  | 1121  | 1055  | 1601  | 1652  | 1652  | 1568  | 2118  | 2078  | 2171  | 2130  |
| K00011 aldehyde reductase [EC:1.1.1.21]                                                                                 | 0     | 1     | 1     | 1     | 2     | 0     | 0     | 0     | 1     | 0     | 0     | 1     |
| K00012 UDPglucose 6-dehydrogenase [EC:1.1.1.122]                                                                        | 4860  | 4927  | 4712  | 4734  | 4380  | 4256  | 4495  | 4275  | 4567  | 4348  | 4457  | 4574  |
| K00039 ribitol 2-dehydrogenase [EC:1.1.1.56]                                                                            | 299   | 269   | 291   | 290   | 90    | 85    | 81    | 68    | 626   | 583   | 502   | 623   |
| K00040 fructuronate reductase [EC:1.1.1.57]                                                                             | 2486  | 2472  | 2378  | 2464  | 1347  | 1297  | 1290  | 1280  | 3215  | 3389  | 3118  | 3429  |
| K00041 tagaturonate reductase [EC:1.1.1.58]                                                                             | 2083  | 2071  | 2201  | 2086  | 3393  | 3504  | 3370  | 3429  | 3525  | 3390  | 3570  | 3383  |
| K00065 2-dehydro-3-deoxy-D-gluconate 5-dehydrogenase [EC:1.1.1.127]                                                     | 1115  | 1035  | 1014  | 1182  | 628   | 690   | 676   | 657   | 1474  | 1531  | 1418  | 1577  |
| K00078 dihydriodiol dehydrogenase / D-xylulose 1-dehydrogenase (NADP) [EC:1.3.1.20 1.1.1.179]                           | 3     | 5     | 2     | 3     | 0     | 0     | 0     | 0     | 6     | 4     | 8     | 7     |
| K00848 rhamnulokinase [EC:2.7.1.5]                                                                                      | 3459  | 3558  | 3642  | 3705  | 6682  | 6534  | 6926  | 6491  | 6511  | 6449  | 6858  | 6456  |
| K00853 L-ribulokinase [EC:2.7.1.16]                                                                                     | 1299  | 1247  | 1142  | 1256  | 837   | 875   | 798   | 826   | 1743  | 1891  | 1807  | 1757  |
| K00854 xylulokinase [EC:2.7.1.17]                                                                                       | 4970  | 4712  | 4793  | 4953  | 5452  | 5612  | 5553  | 5484  | 6650  | 6832  | 6708  | 6951  |
| K00875 D-ribulokinase [EC:2.7.1.47]                                                                                     | 580   | 677   | 551   | 582   | 190   | 194   | 150   | 159   | 1142  | 1331  | 1145  | 1285  |
| K00880 L-xylulokinase [EC:2.7.1.53]                                                                                     | 823   | 804   | 818   | 881   | 776   | 776   | 759   | 779   | 1397  | 1476  | 1339  | 1455  |
| K00963 UTP-glucose-1-phosphate uridylyltransferase [EC:2.7.7.9]                                                         | 1849  | 1761  | 1751  | 1800  | 1380  | 1480  | 1322  | 1405  | 1673  | 1922  | 1817  | 1890  |
| K01051 pectinesterase [EC:3.1.1.11]                                                                                     | 3926  | 4011  | 4473  | 4185  | 11896 | 11951 | 11827 | 11802 | 9605  | 8792  | 9556  | 9076  |
| K01184 polygalacturonase [EC:3.2.1.15]                                                                                  | 289   | 304   | 279   | 275   | 409   | 449   | 442   | 414   | 0     | 0     | 0     | 0     |
| K01195 beta-glucuronidase [EC:3.2.1.31]                                                                                 | 2965  | 2979  | 3153  | 3092  | 7622  | 7568  | 7800  | 7477  | 7097  | 6746  | 7115  | 6902  |
| K01629 rhamnulose-1-phosphate aldolase [EC:4.1.2.19]                                                                    | 1607  | 1667  | 1649  | 1640  | 2389  | 2398  | 2490  | 2204  | 2563  | 2676  | 2734  | 2633  |
| K01685 altronate hydrolase [EC:4.2.1.7]                                                                                 | 2431  | 2566  | 2555  | 2492  | 3502  | 3676  | 3728  | 3688  | 3753  | 3776  | 3898  | 4004  |
| K01686 mannonate dehydratase [EC:4.2.1.8]                                                                               | 3849  | 3979  | 4004  | 3948  | 4450  | 4710  | 4738  | 4386  | 5266  | 5541  | 5429  | 5326  |
| K01728 pectate lyase [EC:4.2.2.2]                                                                                       | 3     | 0     | 0     | 1     | 0     | 0     | 5     | 0     | 2     | 0     | 2     | 4     |
| K01730 oligogalacturonide lyase [EC:4.2.2.6]                                                                            | 631   | 689   | 615   | 699   | 365   | 326   | 336   | 314   | 1045  | 1122  | 1034  | 1116  |
| K01804 L-arabinose isomerase [EC:5.3.1.4]                                                                               | 2549  | 2511  | 2697  | 2657  | 3997  | 3737  | 4147  | 4192  | 4436  | 4335  | 4125  | 4125  |
| K01805 xylulose isomerase [EC:5.3.1.5]                                                                                  | 2294  | 2252  | 2320  | 2376  | 3355  | 3399  | 3445  | 3341  | 3967  | 4059  | 4083  | 4057  |
| K01812 glucuronate isomerase [EC:5.3.1.12]                                                                              | 2164  | 2561  | 2772  | 2718  | 3536  | 3561  | 3659  | 3543  | 3609  | 3502  | 3594  | 3642  |
| K01815 4-deoxy-L-threo-5-hexulosulose-uronate ketol-isomerase [EC:5.3.1.17]                                             | 1960  | 1995  | 2170  | 2032  | 4663  | 4455  | 4441  | 4525  | 3514  | 3740  | 3703  | 3442  |
| K01820 L-rhamnose isomerase / sugar isomerase [EC:5.3.1.14 5.3.1.-]                                                     | 0     | 2     | 2     | 2     | 3     | 2     | 0     | 0     | 0     | 5     | 3     | 1     |
| K03077 L-ribulose-5-phosphate 4-epimerase [EC:5.1.3.4]                                                                  | 2082  | 2170  | 2151  | 2159  | 2252  | 2448  | 2505  | 2392  | 2848  | 2789  | 2768  | 2669  |
| K03078 3-dehydro-L-gulonate-6-phosphate decarboxylase [EC:4.1.1.85]                                                     | 667   | 600   | 631   | 634   | 551   | 568   | 551   | 578   | 697   | 633   | 632   | 718   |
| K03079 L-ribulose-5-phosphate 3-epimerase [EC:5.1.3.22]                                                                 | 1003  | 944   | 889   | 996   | 678   | 845   | 773   | 719   | 973   | 1027  | 1059  | 1008  |
| K03331 L-xylulose reductase [EC:1.1.1.10]                                                                               | 0     | 0     | 0     | 1     | 0     | 0     | 0     | 0     | 0     | 0     | 0     | 1     |
| K03351 D-xylulose reductase [EC:1.1.1.9]                                                                                | 4     | 1     | 2     | 5     | 6     | 1     | 0     | 3     | 2     | 10    | 5     | 6     |
| K03352 D-ribitol-5-phosphate 2-dehydrogenase (NADP+) [EC:1.1.1.405]                                                     | 1     | 5     | 0     | 2     | 0     | 1     | 2     | 7     | 4     | 11    | 6     | 9     |
| K08092 3-dehydro-L-gulonate 2-dehydrogenase [EC:1.1.1.130]                                                              | 292   | 283   | 295   | 327   | 451   | 465   | 435   | 407   | 114   | 162   | 122   | 132   |
| K08322 L-gulonate 5-dehydrogenase [EC:1.1.1.380]                                                                        | 691   | 720   | 614   | 708   | 379   | 374   | 414   | 420   | 1084  | 1083  | 1004  | 1101  |
| K08323 mannonate dehydratase [EC:4.2.1.8]                                                                               | 762   | 763   | 769   | 788   | 754   | 820   | 784   | 726   | 675   | 660   | 663   | 673   |
| K09988 D-lyxose ketol-isomerase [EC:5.3.1.15]                                                                           | 514   | 517   | 477   | 597   | 469   | 522   | 523   | 499   | 618   | 720   | 608   | 718   |
| K13877 2,5-dioxopentanoate dehydrogenase [EC:1.2.1.26]                                                                  | 4060  | 3708  | 3521  | 3761  | 2044  | 1876  | 1757  | 2170  | 1255  | 1019  | 1003  | 1098  |
| K14274 xylonolactonase [EC:3.1.1.-]                                                                                     | 565   | 558   | 598   | 604   | 372   | 363   | 342   | 419   | 739   | 781   | 766   | 817   |
| K16849 altronate dehydratase small subunit [EC:4.2.1.7]                                                                 | 73    | 66    | 68    | 71    | 35    | 43    | 55    | 38    | 119   | 114   | 106   | 115   |
| K16850 altronate dehydratase large subunit [EC:4.2.1.7]                                                                 | 649   | 677   | 635   | 681   | 321   | 321   | 308   | 286   | 985   | 1029  | 909   | 1014  |
| K17743 D-xylulose reductase [EC:1.1.1.307]                                                                              | 0     | 0     | 1     | 1     | 3     | 1     | 3     | 0     | 0     | 1     | 2     | 0     |
| K17818 D-arabinitol dehydrogenase (NADP+) [EC:1.1.1.287]                                                                | 2     | 1     | 2     | 3     | 2     | 2     | 3     | 0     | 4     | 2     | 3     | 5     |
| K18106 D-galacturonate reductase [EC:1.1.1.-]                                                                           | 0     | 0     | 0     | 0     | 0     | 0     | 0     | 0     | 0     | 0     | 0     | 1     |
| K19588 2,5-dioxopentanoate dehydrogenase [EC:1.2.1.26]                                                                  | 1     | 2     | 1     | 1     | 7     | 3     | 2     | 3     | 4     | 0     | 2     | 1     |
| K21030 D-ribitol-5-phosphate cytidylyltransferase [EC:2.7.7.40]                                                         | 4     | 2     | 2     | 1     | 0     | 0     | 1     | 0     | 1     | 12    | 3     | 18    |
| K21031 D-ribitol-5-phosphate cytidylyltransferase [EC:2.7.7.40]                                                         | 0     | 0     | 0     | 0     | 0     | 0     | 0     | 0     | 0     | 0     | 0     | 1     |
| K21619 tagaturonate epimerase [EC:5.1.2.7]                                                                              | 39    | 40    | 38    | 26    | 2     | 0     | 0     | 0     | 97    | 85    | 76    | 82    |
| K21681 ribitol-5-phosphate 2-dehydrogenase (NADP+) / D-ribitol-5-phosphate cytidylyltransferase [EC:1.1.1.405 2.7.7.40] | 152   | 160   | 196   | 144   | 246   | 292   | 236   | 272   | 24    | 22    | 24    | 36    |
| K22185 D-xylose 1-dehydrogenase [EC:1.1.1.175]                                                                          | 153   | 173   | 166   | 163   | 230   | 2     |       |       |       |       |       |       |

|                                                                                                      |       |        |        |        |        |        |        |        |        |        |        |        |
|------------------------------------------------------------------------------------------------------|-------|--------|--------|--------|--------|--------|--------|--------|--------|--------|--------|--------|
| K01813 L-rhamnose isomerase [EC:5.3.1.14]                                                            | 2188  | 2321   | 2379   | 2329   | 3516   | 3678   | 3678   | 3581   | 3820   | 3984   | 3793   | 3794   |
| K01818 L-fucose/D-arabinose isomerase [EC:5.3.1.25 5.3.1.3]                                          | 2097  | 2196   | 2258   | 2223   | 4023   | 3915   | 3965   | 3908   | 4625   | 4663   | 4665   | 4529   |
| K01840 phosphomannomutase [EC:5.4.2.8]                                                               | 1620  | 1746   | 1779   | 1789   | 3556   | 3505   | 3505   | 3544   | 3582   | 3481   | 3538   | 3321   |
| K02377 GDP-L-fucose synthase [EC:1.1.1.271]                                                          | 1022  | 1100   | 1029   | 1149   | 2584   | 2716   | 2653   | 2603   | 1655   | 1680   | 1508   | 1550   |
| K02768 PTS system, fructose-specific IIA component [EC:2.7.1.202]                                    | 418   | 440    | 417    | 468    | 278    | 270    | 224    | 233    | 477    | 528    | 475    | 496    |
| K02769 PTS system, fructose-specific IIB component [EC:2.7.1.202]                                    | 206   | 199    | 182    | 187    | 131    | 167    | 151    | 171    | 266    | 267    | 288    | 321    |
| K02770 PTS system, fructose-specific IIC component                                                   | 3676  | 3765   | 3503   | 3644   | 2009   | 1940   | 1789   | 1935   | 3411   | 3654   | 3318   | 3616   |
| K02771 PTS system, fructose-specific IID component                                                   | 0     | 0      | 0      | 0      | 0      | 0      | 0      | 0      | 0      | 0      | 0      | 1      |
| K02781 PTS system, glucitol/sorbitol-specific IIA component [EC:2.7.1.198]                           | 475   | 445    | 456    | 580    | 375    | 418    | 327    | 330    | 658    | 651    | 630    | 620    |
| K02783 PTS system, glucitol/sorbitol-specific IIC component                                          | 956   | 938    | 905    | 941    | 736    | 721    | 712    | 640    | 1332   | 1359   | 1278   | 1367   |
| K02793 PTS system, mannose-specific IIA component [EC:2.7.1.191]                                     | 188   | 157    | 147    | 152    | 31     | 26     | 61     | 17     | 105    | 127    | 138    | 114    |
| K02794 PTS system, mannose-specific IIB component [EC:2.7.1.191]                                     | 967   | 997    | 871    | 958    | 417    | 470    | 400    | 418    | 1011   | 1114   | 1051   | 1071   |
| K02795 PTS system, mannose-specific IIC component                                                    | 1385  | 1343   | 1357   | 1420   | 488    | 505    | 471    | 487    | 1183   | 1299   | 1239   | 1259   |
| K02796 PTS system, mannose-specific IID component                                                    | 1417  | 1411   | 1444   | 1429   | 532    | 516    | 610    | 507    | 1261   | 1471   | 1362   | 1372   |
| K02798 PTS system, mannitol-specific IIA component [EC:2.7.1.197]                                    | 65    | 59     | 51     | 64     | 24     | 23     | 27     | 16     | 102    | 111    | 93     | 90     |
| K02800 PTS system, mannitol-specific IIC component                                                   | 1552  | 1523   | 1422   | 1553   | 991    | 1062   | 993    | 1032   | 1889   | 2113   | 1955   | 2045   |
| K02812 PTS system, sorbose-specific IIA component [EC:2.7.1.206]                                     | 87    | 79     | 93     | 74     | 66     | 70     | 73     | 58     | 25     | 36     | 31     | 26     |
| K02813 PTS system, sorbose-specific IIB component [EC:2.7.1.206]                                     | 149   | 180    | 195    | 182    | 159    | 157    | 156    | 171    | 33     | 43     | 28     | 44     |
| K02814 PTS system, sorbose-specific IIC component                                                    | 190   | 195    | 245    | 203    | 251    | 265    | 268    | 269    | 45     | 67     | 62     | 67     |
| K02815 PTS system, sorbose-specific IID component                                                    | 267   | 287    | 269    | 286    | 292    | 296    | 294    | 292    | 45     | 66     | 45     | 54     |
| K03332 fructan beta-fructosidase [EC:3.2.1.80]                                                       | 1635  | 1913   | 1849   | 1781   | 5225   | 5214   | 5283   | 4912   | 4049   | 3933   | 4033   | 3799   |
| K05305 fucokinase [EC:2.7.1.52]                                                                      | 104   | 100    | 121    | 106    | 37     | 69     | 92     | 49     | 204    | 203    | 182    | 229    |
| K07026 mannosyl-3-phosphoglycerate phosphatase [EC:3.1.3.70]                                         | 160   | 158    | 163    | 173    | 178    | 299    | 257    | 251    | 26     | 46     | 19     | 34     |
| K07046 L-fuconolactonase [EC:3.1.1.-]                                                                | 9     | 2      | 4      | 7      | 0      | 2      | 0      | 1      | 0      | 0      | 2      | 0      |
| K08261 D-sorbitol dehydrogenase [acceptor] [EC:1.1.99.21]                                            | 1     | 0      | 1      | 0      | 3      | 0      | 0      | 0      | 0      | 0      | 0      | 0      |
| K12660 2-dehydro-3-deoxy-L-rhamnonate aldolase [EC:4.1.2.53]                                         | 530   | 518    | 454    | 518    | 335    | 313    | 322    | 342    | 638    | 605    | 622    | 668    |
| K12661 L-rhamnonate dehydratase [EC:4.2.1.90]                                                        | 699   | 741    | 709    | 746    | 482    | 581    | 485    | 465    | 1026   | 1064   | 1002   | 1100   |
| K15856 GDP-4-dehydro-6-deoxy-D-mannose reductase [EC:1.1.1.281]                                      | 1859  | 1744   | 1660   | 1739   | 975    | 916    | 867    | 891    | 626    | 524    | 603    | 669    |
| K16011 mannose-1-phosphate guanylyltransferase / mannose-6-phosphate isomerase [EC:2.7.7.13 5.3.1.8] | 6543  | 6460   | 6085   | 6326   | 3518   | 3457   | 3448   | 3537   | 2144   | 2039   | 1943   | 1989   |
| K16881 mannose-1-phosphate guanylyltransferase / phosphomannomutase [EC:2.7.7.13 5.4.2.8]            | 11    | 18     | 11     | 9      | 2      | 0      | 2      | 0      | 10     | 2      | 3      | 1      |
| K17195 D-allulose-6-phosphate 3-epimerase [EC:5.1.3.-]                                               | 338   | 340    | 326    | 366    | 76     | 78     | 308    | 70     | 600    | 638    | 562    | 641    |
| K17742 sorbose reductase [EC:1.1.1.289]                                                              | 1     | 0      | 0      | 0      | 0      | 0      | 0      | 0      | 1      | 0      | 0      | 0      |
| K18333 L-fucose dehydrogenase                                                                        | 20    | 9      | 11     | 13     | 3      | 2      | 0      | 4      | 13     | 11     | 5      | 7      |
| K18334 L-fuconate dehydratase [EC:4.2.1.68]                                                          | 3     | 2      | 3      | 2      | 1      | 0      | 7      | 6      | 3      | 10     | 15     | 4      |
| K18335 2-keto-3-deoxy-L-fuconate dehydrogenase [EC:1.1.1.-]                                          | 3     | 5      | 0      | 1      | 0      | 5      | 3      | 0      | 2      | 1      | 1      | 3      |
| K18337 L-rhamnose 1-dehydrogenase [EC:1.1.1.378 1.1.1.377 1.1.1.173]                                 | 2     | 7      | 1      | 1      | 0      | 0      | 0      | 0      | 0      | 1      | 0      | 0      |
| K19290 mannuronan synthase [EC:2.4.1.33]                                                             | 2230  | 2184   | 2287   | 2302   | 1302   | 1216   | 1162   | 1247   | 729    | 695    | 708    | 761    |
| K19291 mannuronan synthase [EC:2.4.1.33]                                                             | 1684  | 1554   | 1525   | 1517   | 929    | 827    | 777    | 888    | 507    | 556    | 458    | 511    |
| K19355 mannan endo-1,4-beta-mannosidase [EC:3.2.1.78]                                                | 80    | 69     | 69     | 53     | 200    | 180    | 188    | 194    | 13     | 37     | 45     | 37     |
| K19956 L-sorbose 1-phosphate reductase [EC:1.1.1.-]                                                  | 434   | 405    | 465    | 418    | 456    | 447    | 443    | 435    | 202    | 202    | 190    | 197    |
| K21883 2-dehydro-3-deoxy-L-rhamnonate dehydrogenase (NAD+) [EC:1.1.1.401]                            | 1     | 2      | 3      | 5      | 0      | 0      | 0      | 0      | 1      | 4      | 2      | 1      |
| ko00052 Galactose metabolism                                                                         | 98623 | 101417 | 103752 | 102272 | 155223 | 156456 | 157136 | 153939 | 154648 | 155519 | 155464 | 154988 |
| K00035 D-galactose 1-dehydrogenase [EC:1.1.1.48]                                                     | 0     | 1      | 0      | 0      | 0      | 2      | 0      | 2      | 0      | 2      | 0      | 0      |
| K00094 galactitol-3-phosphate 5-dehydrogenase [EC:1.1.1.251]                                         | 5     | 3      | 3      | 2      | 10     | 13     | 10     | 6      | 47     | 56     | 38     | 43     |
| K00849 galactokinase [EC:2.7.1.6]                                                                    | 2393  | 2603   | 2469   | 2460   | 3289   | 3311   | 3448   | 3314   | 3443   | 3599   | 3314   | 3607   |
| K00883 2-dehydro-3-deoxygalactonokinase [EC:2.7.1.58]                                                | 995   | 924    | 945    | 984    | 527    | 566    | 582    | 540    | 1590   | 1511   | 1424   | 1533   |
| K00917 tagatose 6-phosphate kinase [EC:2.7.1.144]                                                    | 119   | 130    | 154    | 136    | 60     | 57     | 45     | 53     | 212    | 271    | 218    | 255    |
| K00965 UDPglucose--hexose-1-phosphate uridylyltransferase [EC:2.7.7.12]                              | 1321  | 1413   | 1373   | 1488   | 1030   | 1083   | 983    | 977    | 1529   | 1441   | 1494   | 1511   |
| K01182 oligo-1,6-glucosidase [EC:3.2.1.10]                                                           | 1373  | 1325   | 1385   | 1366   | 323    | 374    | 351    | 332    | 1526   | 1619   | 1547   | 1621   |
| K01187 alpha-glucosidase [EC:3.2.1.20]                                                               | 9858  | 10342  | 11056  | 10380  | 22900  | 23140  | 23139  | 22711  | 19666  | 19818  | 20303  | 19484  |
| K01190 beta-galactosidase [EC:3.2.1.23]                                                              | 22473 | 23862  | 24933  | 23509  | 54266  | 54176  | 54438  | 53231  | 40247  | 38418  | 39959  | 38794  |
| K01193 beta-fructofuranosidase [EC:3.2.1.26]                                                         | 4207  | 4334   | 4229   | 4392   | 2703   | 2867   | 2703   | 2603   | 5125   | 5236   | 5272   | 5441   |
| K01220 6-phospho-beta-galactosidase [EC:3.2.1.85]                                                    | 82    | 76     | 79     | 98     | 30     | 66     | 34     | 56     | 127    | 151    | 148    | 138    |
| K01229 lactase-phlorizin hydrolase [EC:3.2.1.108 3.2.1.62]                                           | 1     | 0      | 0      | 0      | 0      | 0      | 0      | 0      | 0      | 0      | 0      | 1      |
| K01631 2-dehydro-3-deoxyphosphogalactonate aldolase [EC:4.1.2.21]                                    | 593   | 623    | 600    | 749    | 336    | 346    | 340    | 374    | 1104   | 1112   | 1031   | 1021   |
| K01635 tagatose 1,6-diphosphate aldolase [EC:4.1.2.40]                                               | 154   | 158    | 174    | 170    | 46     | 77     | 55     | 66     | 176    | 239    | 218    | 219    |
| K01684 galactonate dehydratase [EC:4.2.1.6]                                                          | 1720  | 1614   | 1721   | 1715   | 567    | 596    | 626    | 642    | 1664   | 1806   | 1670   | 1831   |
| K01784 UDP-glucose 4-epimerase [EC:5.1.3.2]                                                          | 4262  | 4362   | 4301   | 4297   | 4811   | 4755   | 4699   | 4702   | 5126   | 5274   | 5242   | 5493   |
| K01819 galactose-6-phosphate isomerase [EC:5.3.1.26]                                                 | 108   | 107    | 87     | 109    | 35     | 54     | 50     | 42     | 135    | 165    | 143    | 119    |
| K01854 UDP-galactopyranose mutase [EC:5.4.99.9]                                                      | 1271  | 1340   | 1336   | 1376   | 1278   | 1176   | 1317   | 1308   | 2606   | 2722   | 2528   | 2666   |
| K02079 N-acetylgalactosamine-6-phosphate deacetylase [EC:3.5.1.25]                                   | 13    | 2      | 2      | 5      | 14     | 19     | 18     | 11     | 67     | 91     | 55     | 62     |
| K02080 galactosamine-6-phosphate isomerase [EC:5.3.1.-]                                              | 185   | 143    | 150    | 173    | 256    | 282    | 252    | 227    | 72     | 67     | 71     | 58     |
| K02744 PTS system, N-acetylgalactosamine-specific IIA component [EC:2.7.1.-]                         | 326   | 308    | 394    | 383    | 197    | 217    | 199    | 206    | 167    | 205    | 184    | 219    |
| K02745 PTS system, N-acetylgalactosamine-specific IIB component [EC:2.7.1.-]                         | 41    | 55     | 48     | 61     | 13     | 15     | 16     | 9      | 90     | 53     | 78     | 60     |
| K02746 PTS system, N-acetylgalactosamine-specific IIC component                                      | 83    | 91     | 90     | 84     | 34     | 34     | 24     | 29     | 135    | 167    | 136    | 108    |
| K02747 PTS system, N-acetylgalactosamine-specific IID component                                      | 121   | 105    | 119    | 152    | 21     | 35     | 27     | 36     | 115    | 206    | 155    | 189    |
| K02773 PTS system, galactitol-specific IIA component [EC:2.7.1.200]                                  | 67    | 68     | 86     | 57     | 27     | 30     | 29     | 26     | 95     | 132    | 122    | 148    |
| K02774 PTS system, galactitol-specific IIB component [EC:2.7.1.200]                                  | 69    | 46     | 40     | 49     | 24     | 16     | 11     | 7      | 101    | 120    | 77     | 95     |
| K02775 PTS system, galactitol-specific IIC component                                                 | 1338  | 1472   | 1557   | 1487   | 3198   | 3233   | 3307   | 3170   | 3232   | 3324   | 3385   | 3450   |
| K02786 PTS system, lactose-specific IIA component [EC:2.7.1.207]                                     | 24    | 27     | 23     | 21     | 8      | 20     | 6      | 18     | 39     | 48     | 25     | 28     |
| K02788 PTS system, lactose-specific IIC component                                                    | 119   | 104    | 138    | 96     | 73     | 79     | 69     | 45     | 138    | 179    | 169    | 139    |
| K06617 raffinose synthase [EC:2.4.1.82]                                                              | 0     | 0      | 1      | 0      | 0      | 2      | 0      | 0      | 0      | 0      | 0      | 0      |
| K07406 alpha-galactosidase [EC:3.2.1.22]                                                             | 2047  | 2029   | 1906   | 1946   | 490    | 530    | 489    | 431    | 3502   | 3637   | 3365   | 3697   |
| K07407 alpha-galactosidase [EC:3.2.1.22]                                                             | 8234  | 8579   | 9005   | 8696   | 14632  | 14741  | 14912  | 14439  | 15668  | 15810  | 15673  | 15470  |
| K08302 tagatose 1,6-diphosphate aldolase GatY/KbaY [EC:4.1.2.40]                                     | 213   | 228    | 215    | 240    | 341    | 377    | 342    | 304    | 193    | 197    | 225    | 209    |
| K10984 PTS system, galactosamine-specific IIB component [EC:2.7.1.-]                                 | 108   | 102    | 95     | 116    | 219    | 204    | 153    | 141    | 18     | 21     | 15     | 14     |
| K10985 PTS system, galactosamine-specific IIC component                                              | 149   | 164    | 159    | 188    | 26     | 273    | 260    | 258    | 30     | 39     | 46     | 42     |
| K10986 PTS system, galactosamine-specific IID component                                              | 210   | 160    | 162    | 192    | 269    | 301    | 268    | 279    | 64     | 57     | 49     | 47     |
| K12111 evolved beta-galactosidase subunit alpha [EC:3.2.1.23]                                        | 582   | 521    | 562    | 576    | 131    | 102    | 102    | 102    | 772    | 834    | 781    | 836    |
| K12112 evolved beta-galactosidase subunit beta                                                       | 3     | 2      | 0      | 0      | 2      | 8      | 2      | 6      | 30     | 32     | 19     | 30     |
| K12308 beta-galactosidase [EC:3.2.1.23]                                                              | 7252  | 7550   | 7621   | 7746   | 8363   | 8310   | 8731   | 8624   | 12368  | 12998  | 12754  | 12824  |
| K12309 beta-galactosidase [EC:3.2.1.23]                                                              | 4     | 5      | 1      | 4      | 9      | 5      | 7      | 9      | 4      | 10     | 4      | 5      |
| K16371 D-tagatose-1,6-bisphosphate aldolase subunit GatZ/KbaZ                                        | 272   | 291    | 266    | 251    | 551    | 519    | 524    | 488    | 133    | 147    | 150    | 157    |
| K17716 UDP-glucose 4-epimerase [EC:5.1.3.2]                                                          | 189   | 185    | 206    | 196    | 74     | 50     | 73     | 75     | 109    | 115    | 98     | 122    |
| K21620 galactitol 2-dehydrogenase [EC:1.1.1.16]                                                      | 2     | 0      | 0      | 2      | 0      | 0      | 0      | 5      | 2      | 2      | 2      | 1      |
| K21621 tagatose kinase [EC:2.7.1.101]                                                                | 0     | 2      | 0      | 0      | 4      | 2      | 3      | 2      | 2      | 0      | 2      | 7      |
| K21622 D-tagatose 6-phosphate 4-epimerase [EC:5.1.3.40]                                              | 0     | 0      | 0      | 1      | 0      | 2      | 0      | 0      | 7      | 8      | 2      | 6      |
| ko00053 Ascorbate and aldarate metabolism                                                            | 31565 | 31134  | 30516  | 31214  | 27069  | 27246  | 27067  | 26966  | 31810  | 31724  | 31617  | 31764  |
| K01630 2-dehydro-3-deoxyglucarate aldolase [EC:4.1.2.20]                                             | 736   | 719    | 667    | 770    | 367    | 336    | 352    | 361    | 824    | 912    | 887    | 885    |
| K01706 glucarate dehydratase [EC:4.2.1.40]                                                           | 1226  | 1190   | 1186   | 1252   | 1009   | 1030   | 1081   | 1072   | 1025   | 1300   | 1197   | 1233   |
| K01708 galactarate dehydratase [EC:4.2.1.42]                                                         | 874   | 873    | 852    | 928    | 708    | 701    | 656    | 681    | 1135   | 1122   | 1122   | 1141   |
| K02821 PTS system, ascorbate-specific IIA component [EC:2.7.1.194]                                   | 1082  | 1013   | 1010   | 1057   | 648    | 578    | 543    | 500    | 1559   | 1706   | 1630   | 1771   |
| K02822 PTS system, ascorbate-specific IIB component [EC:2.7.1.194]                                   | 841   | 776    | 849    | 845    | 373    | 353    | 375    | 424    | 1206   | 1330   | 1279   | 1242   |
| K03475 PTS system, ascorbate-specific IIC component                                                  | 3851  | 3813   | 3771   | 4014   | 2213   | 2255   | 2258   | 2055   | 3352   | 3462   | 3478   | 3488   |
| K03476 L-ascorbate 6-phosphate lactonase [EC:3.1.1.-]                                                | 1146  | 1098   | 1060   | 1093   | 576    | 686    | 626    | 581    | 1334   | 1401   | 1441   | 1423   |
| K13874 L-arabinonolactonase [EC:3.1.1.15]                                                            | 273   | 364    | 297    | 312    | 80     | 79     | 61     | 64     | 648    | 720    | 642    | 652    |
| K                                                                                                    |       |        |        |        |        |        |        |        |        |        |        |        |

[illegible]

|                                                                                                                                |        |        |        |        |        |        |        |        |        |        |        |       |
|--------------------------------------------------------------------------------------------------------------------------------|--------|--------|--------|--------|--------|--------|--------|--------|--------|--------|--------|-------|
| K00656 formate C-acetyltransferase [EC:2.3.1.54]                                                                               | 7945   | 7917   | 8001   | 8345   | 7622   | 7705   | 7755   | 7440   | 11462  | 11561  | 11251  | 11563 |
| K00925 acetate kinase [EC:2.7.2.1]                                                                                             | 3296   | 3363   | 3477   | 3447   | 3947   | 4034   | 3901   | 3969   | 4148   | 4181   | 4090   | 4204  |
| K01003 oxaloacetate decarboxylase [EC:4.1.1.112]                                                                               | 335    | 364    | 345    | 411    | 187    | 173    | 160    | 228    | 106    | 139    | 139    | 130   |
| K01006 pyruvate, orthophosphate dikinase [EC:2.7.9.1]                                                                          | 3379   | 3242   | 3490   | 3196   | 5671   | 5800   | 5897   | 5735   | 5078   | 5121   | 5307   | 4888  |
| K01007 pyruvate, water dikinase [EC:2.7.9.2]                                                                                   | 5017   | 4873   | 5022   | 4913   | 2926   | 3187   | 2887   | 3093   | 3465   | 3464   | 3380   | 3573  |
| K01026 propionate CoA-transferase [EC:2.8.3.1]                                                                                 | 722    | 833    | 699    | 788    | 190    | 225    | 214    | 205    | 1436   | 1406   | 1544   | 1542  |
| K01067 acetyl-CoA hydrolase [EC:3.1.2.1]                                                                                       | 0      | 0      | 0      | 0      | 1      | 0      | 0      | 0      | 0      | 0      | 0      | 0     |
| K01069 hydroxyacylglutathione hydrolase [EC:3.1.2.6]                                                                           | 3441   | 3472   | 3483   | 3508   | 3006   | 3075   | 3125   | 3021   | 2876   | 2791   | 2947   | 2861  |
| K01512 acylphosphatase [EC:3.6.1.7]                                                                                            | 739    | 755    | 725    | 761    | 403    | 405    | 428    | 396    | 548    | 515    | 531    | 561   |
| K01571 oxaloacetate decarboxylase (Na+ extruding) subunit alpha [EC:7.2.4.2]                                                   | 1987   | 1940   | 2047   | 1978   | 651    | 667    | 644    | 615    | 3462   | 3549   | 3473   | 3659  |
| K01573 oxaloacetate decarboxylase (Na+ extruding) subunit gamma                                                                | 143    | 144    | 156    | 159    | 462    | 434    | 440    | 461    | 356    | 315    | 350    | 349   |
| K01595 phosphoenolpyruvate carboxylase [EC:4.1.1.31]                                                                           | 5733   | 5478   | 5363   | 5511   | 3393   | 3386   | 3216   | 3462   | 3684   | 3584   | 3501   | 3668  |
| K01638 malate synthase [EC:2.3.3.9]                                                                                            | 4633   | 4764   | 4455   | 4608   | 2739   | 2892   | 2747   | 2841   | 2776   | 2824   | 2661   | 2731  |
| K01649 2-isopropylmalate synthase [EC:2.3.3.13]                                                                                | 5799   | 5824   | 5830   | 5944   | 5937   | 5857   | 5723   | 5763   | 6806   | 6975   | 6960   | 7000  |
| K01759 lactoylglutathione lyase [EC:4.4.1.5]                                                                                   | 3219   | 3155   | 3203   | 3128   | 2364   | 2303   | 2311   | 2320   | 2190   | 2142   | 2280   | 2265  |
| K01961 acetyl-CoA carboxylase, biotin carboxylase subunit [EC:6.4.1.2 6.3.4.14]                                                | 6545   | 6692   | 6582   | 6701   | 8752   | 8665   | 9021   | 9035   | 7342   | 7278   | 7398   | 7276  |
| K01962 acetyl-CoA carboxylase carboxyl transferase subunit alpha [EC:6.4.1.2 2.1.3.15]                                         | 1838   | 1852   | 1945   | 1848   | 1172   | 1258   | 1174   | 1308   | 1327   | 1443   | 1394   | 1391  |
| K01963 acetyl-CoA carboxylase carboxyl transferase subunit beta [EC:6.4.1.2 2.1.3.15]                                          | 3022   | 2941   | 3063   | 2958   | 1607   | 1574   | 1475   | 1488   | 2072   | 2130   | 1947   | 2156  |
| K02160 acetyl-CoA carboxylase biotin carboxyl carrier protein                                                                  | 666    | 678    | 660    | 627    | 438    | 423    | 505    | 462    | 592    | 635    | 563    | 626   |
| K02594 homocitrate synthase NifV [EC:2.3.3.14]                                                                                 | 274    | 274    | 209    | 220    | 317    | 353    | 317    | 319    | 12     | 14     | 13     | 13    |
| K03777 D-lactate dehydrogenase (quinone) [EC:1.1.5.12]                                                                         | 1052   | 1006   | 934    | 1000   | 631    | 727    | 666    | 664    | 1369   | 1570   | 1424   | 1429  |
| K03778 D-lactate dehydrogenase [EC:1.1.1.28]                                                                                   | 2892   | 3138   | 2939   | 2981   | 3557   | 3360   | 3398   | 3298   | 3266   | 3112   | 3226   | 3184  |
| K04020 phosphotransacylase                                                                                                     | 373    | 387    | 341    | 420    | 113    | 142    | 130    | 131    | 823    | 823    | 843    | 868   |
| K04021 aldehyde dehydrogenase                                                                                                  | 567    | 554    | 452    | 567    | 122    | 158    | 131    | 162    | 1096   | 1108   | 1107   | 1202  |
| K04073 acetaldehyde dehydrogenase [EC:1.2.1.10]                                                                                | 315    | 280    | 266    | 314    | 71     | 85     | 72     | 75     | 569    | 558    | 533    | 568   |
| K05523 D-lactate dehydratase / protein deglycase [EC:4.2.1.130 3.5.1.124]                                                      | 1199   | 1261   | 1149   | 1187   | 683    | 667    | 583    | 658    | 468    | 396    | 394    | 381   |
| K07248 lactaldehyde dehydrogenase / glycolaldehyde dehydrogenase [EC:1.2.1.22 1.2.1.21]                                        | 962    | 946    | 970    | 902    | 715    | 838    | 795    | 787    | 1141   | 999    | 1092   | 1161  |
| K10977 methanogen homocitrate synthase [EC:2.3.3.14 2.3.3.-]                                                                   | 0      | 2      | 0      | 0      | 0      | 2      | 2      | 3      | 5      | 7      | 3      | 20    |
| K11262 acetyl-CoA carboxylase / biotin carboxylase 1 [EC:6.4.1.2 6.3.4.14 2.1.3.15]                                            | 0      | 1      | 0      | 0      | 0      | 0      | 0      | 0      | 0      | 0      | 0      | 0     |
| K11263 acetyl-CoA/propionyl-CoA carboxylase, biotin carboxylase, biotin carboxyl carrier protein [EC:6.4.1.2 6.4.1.3 6.3.4.14] | 4      | 0      | 7      | 5      | 8      | 5      | 5      | 5      | 11     | 14     | 19     | 18    |
| K12972 glyoxylate/hydroxypyruvate reductase [EC:1.1.1.79 1.1.1.81]                                                             | 1137   | 1005   | 1024   | 1038   | 669    | 730    | 672    | 733    | 1340   | 1421   | 1401   | 1441  |
| K13788 phosphate acetyltransferase [EC:2.3.1.8]                                                                                | 3822   | 3778   | 3660   | 3827   | 2226   | 2252   | 2136   | 2331   | 2613   | 2530   | 2488   | 2628  |
| K15024 putative phosphotransacylase [EC:2.3.1.8]                                                                               | 102    | 134    | 114    | 122    | 32     | 30     | 30     | 23     | 161    | 144    | 144    | 175   |
| K19266 lactaldehyde dehydrogenase [EC:1.2.1.22]                                                                                | 0      | 0      | 3      | 0      | 2      | 2      | 0      | 1      | 1      | 10     | 8      | 19    |
| K20509 carboxybiotin decarboxylase [EC:7.2.4.1]                                                                                | 5192   | 5339   | 5507   | 5349   | 8011   | 8264   | 8525   | 7967   | 9880   | 9486   | 9603   | 9806  |
| K22212 malolactic enzyme [EC:4.1.1.101]                                                                                        | 9      | 5      | 19     | 13     | 40     | 28     | 14     | 16     | 22     | 33     | 32     | 24    |
| K22373 lactate racemase [EC:5.1.2.1]                                                                                           | 121    | 147    | 151    | 104    | 108    | 137    | 123    | 126    | 155    | 190    | 156    | 177   |
| K23257 methylglyoxal/glyoxal reductase [EC:1.1.1.283 1.1.1.-]                                                                  | 351    | 360    | 359    | 412    | 62     | 67     | 87     | 69     | 289    | 293    | 351    | 373   |
| ko00630 Glyoxylate and dicarboxylate metabolism                                                                                | 166949 | 165626 | 161838 | 164554 | 151801 | 150936 | 149939 | 152568 | 147471 | 141973 | 143116 |       |
| K00015 glyoxylate reductase [EC:1.1.1.26]                                                                                      | 157    | 160    | 147    | 137    | 30     | 48     | 32     | 35     | 128    | 146    | 125    | 117   |
| K00018 glycerate dehydrogenase [EC:1.1.1.29]                                                                                   | 2829   | 2934   | 2829   | 2928   | 3384   | 3389   | 3173   | 3221   | 2443   | 2232   | 2343   | 2242  |
| K00023 acetoacetyl-CoA reductase [EC:1.1.1.36]                                                                                 | 4      | 2      | 1      | 5      | 0      | 0      | 0      | 1      | 5      | 0      | 0      | 0     |
| K00042 2-hydroxy-3-oxopropionate reductase [EC:1.1.1.160]                                                                      | 1782   | 1805   | 1742   | 1906   | 1057   | 1064   | 1010   | 1079   | 1389   | 1437   | 1272   | 1425  |
| K00048 lactaldehyde reductase [EC:1.1.1.77]                                                                                    | 1622   | 1672   | 1676   | 1709   | 2771   | 2693   | 2959   | 2897   | 3211   | 3155   | 3161   | 3284  |
| K00050 hydroxypyruvate reductase [EC:1.1.1.81]                                                                                 | 19     | 14     | 16     | 19     | 26     | 30     | 29     | 25     | 5      | 9      | 3      | 0     |
| K00104 glycolate oxidase [EC:1.1.3.15]                                                                                         | 2825   | 2710   | 2707   | 2630   | 1540   | 1395   | 1317   | 1572   | 1182   | 1297   | 1172   | 1204  |
| K00123 formate dehydrogenase major subunit [EC:1.17.1.9]                                                                       | 3153   | 3196   | 3192   | 3230   | 2283   | 2466   | 2353   | 2415   | 3640   | 3732   | 3600   | 3756  |
| K00124 formate dehydrogenase iron-sulfur subunit                                                                               | 2179   | 2244   | 2012   | 2167   | 1251   | 1283   | 1233   | 1462   | 1365   | 1382   | 1275   | 1336  |
| K00127 formate dehydrogenase subunit gamma                                                                                     | 1306   | 1270   | 1185   | 1191   | 835    | 894    | 803    | 877    | 947    | 891    | 989    | 1022  |
| K00281 glycine dehydrogenase [EC:1.4.4.2]                                                                                      | 11909  | 11722  | 11036  | 11585  | 10117  | 10076  | 9784   | 10444  | 8371   | 8044   | 7883   | 8286  |
| K00282 glycine dehydrogenase subunit 1 [EC:1.4.4.2]                                                                            | 261    | 244    | 285    | 300    | 150    | 171    | 153    | 151    | 244    | 291    | 207    | 261   |
| K00283 glycine dehydrogenase subunit 2 [EC:1.4.4.2]                                                                            | 502    | 502    | 578    | 500    | 186    | 208    | 238    | 206    | 421    | 447    | 410    | 401   |
| K00284 glutamate synthase (ferredoxin) [EC:1.4.7.1]                                                                            | 0      | 1      | 0      | 1      | 1      | 0      | 1      | 0      | 0      | 0      | 1      | 2     |
| K00600 glycine hydroxymethyltransferase [EC:2.1.2.1]                                                                           | 7337   | 7324   | 7059   | 7016   | 5975   | 5980   | 5914   | 5982   | 5305   | 5019   | 4966   | 5089  |
| K00605 aminomethyltransferase [EC:2.1.2.10]                                                                                    | 5198   | 4861   | 4793   | 4843   | 4648   | 4471   | 4657   | 4688   | 3830   | 3582   | 3702   | 3787  |
| K00830 alanine-glyoxylate transaminase / serine-glyoxylate transaminase [EC:2.6.1.44 2.6.1.45 2.6.1.51]                        | 1      | 9      | 3      | 7      | 0      | 4      | 0      | 2      | 7      | 14     | 3      | 7     |
| K00865 glycinate 2-kinase [EC:2.7.1.165]                                                                                       | 3393   | 3614   | 3388   | 3486   | 3549   | 3779   | 3714   | 3650   | 4913   | 4975   | 4969   | 4881  |
| K01091 phosphoglycolate phosphatase [EC:3.1.3.18]                                                                              | 5374   | 5387   | 5416   | 5395   | 5363   | 5279   | 5455   | 5452   | 4357   | 4435   | 4476   | 4410  |
| K01432 arylformamidase [EC:3.5.1.9]                                                                                            | 0      | 0      | 2      | 1      | 0      | 4      | 2      | 1      | 0      | 2      | 2      | 1     |
| K01433 formyltetrahydrofolate deformylase [EC:3.5.1.10]                                                                        | 3475   | 3469   | 3512   | 3572   | 3545   | 3496   | 3489   | 3359   | 2886   | 2707   | 2745   | 2634  |
| K01455 formamidase [EC:3.5.1.49]                                                                                               | 56     | 39     | 52     | 47     | 3      | 5      | 3      | 0      | 112    | 91     | 88     | 107   |
| K01458 N-formylglutamate deformylase [EC:3.5.1.68]                                                                             | 424    | 424    | 448    | 427    | 371    | 395    | 409    | 354    | 86     | 102    | 87     | 71    |
| K01569 oxalate decarboxylase [EC:4.1.1.2]                                                                                      | 1      | 0      | 0      | 0      | 0      | 0      | 0      | 0      | 0      | 0      | 0      | 0     |
| K01577 oxalyl-CoA decarboxylase [EC:4.1.1.8]                                                                                   | 8      | 11     | 11     | 3      | 28     | 23     | 26     | 22     | 80     | 104    | 109    | 97    |
| K01601 ribulose-bisphosphate carboxylase large chain [EC:4.1.1.39]                                                             | 8      | 10     | 10     | 13     | 0      | 4      | 4      | 2      | 3      | 5      | 8      | 9     |
| K01608 tartronate-semialdehyde synthase [EC:4.1.1.47]                                                                          | 175    | 199    | 195    | 201    | 117    | 120    | 120    | 119    | 288    | 306    | 312    | 265   |
| K01637 isocitrate lyase [EC:4.1.3.1]                                                                                           | 2456   | 2370   | 2381   | 2529   | 1549   | 1591   | 1423   | 1487   | 1664   | 1720   | 1641   | 1694  |
| K01816 hydroxypyruvate isomerase [EC:5.3.1.22]                                                                                 | 828    | 684    | 797    | 794    | 343    | 352    | 389    | 379    | 388    | 451    | 452    | 453   |
| K01846 methylaspartate mutase sigma subunit [EC:5.4.99.1]                                                                      | 20     | 23     | 9      | 15     | 2      | 0      | 7      | 3      | 38     | 43     | 41     | 27    |
| K01847 methylmalonyl-CoA mutase [EC:5.4.99.2]                                                                                  | 2870   | 2877   | 3145   | 3015   | 8943   | 9073   | 9289   | 8726   | 6520   | 6283   | 6668   | 6373  |
| K01848 methylmalonyl-CoA mutase, N-terminal domain [EC:5.4.99.2]                                                               | 103    | 124    | 113    | 115    | 10     | 2      | 10     | 4      | 242    | 296    | 269    | 261   |
| K01849 methylmalonyl-CoA mutase, C-terminal domain [EC:5.4.99.2]                                                               | 19     | 37     | 23     | 26     | 0      | 0      | 0      | 2      | 48     | 51     | 41     | 50    |
| K01915 glutamine synthetase [EC:6.3.1.2]                                                                                       | 22068  | 21588  | 21624  | 21420  | 21354  | 20720  | 21133  | 21547  | 16407  | 16493  | 16608  | 16343 |
| K01965 propionyl-CoA carboxylase alpha chain [EC:6.4.1.3]                                                                      | 2      | 2      | 0      | 1      | 2      | 4      | 0      | 1      | 0      | 5      | 5      | 7     |
| K01966 propionyl-CoA carboxylase beta chain [EC:6.4.1.3 2.1.3.15]                                                              | 1894   | 1885   | 2156   | 2030   | 6363   | 6046   | 6237   | 6211   | 4383   | 4390   | 4578   | 4345  |
| K02437 glycine cleavage system H protein                                                                                       | 1982   | 1966   | 1784   | 1905   | 1825   | 1775   | 1737   | 1836   | 1417   | 1442   | 1516   | 1506  |
| K03418 N,N-dimethylformamidase [EC:3.5.1.56]                                                                                   | 0      | 0      | 0      | 0      | 0      | 0      | 0      | 0      | 0      | 0      | 0      | 0     |
| K03779 L(+)-tartrate dehydratase alpha subunit [EC:4.2.1.32]                                                                   | 609    | 563    | 623    | 564    | 195    | 206    | 191    | 208    | 886    | 1000   | 931    | 905   |
| K03780 L(+)-tartrate dehydratase beta subunit [EC:4.2.1.32]                                                                    | 499    | 521    | 487    | 475    | 199    | 193    | 200    | 198    | 706    | 806    | 727    | 755   |
| K03781 catalase [EC:1.11.1.6]                                                                                                  | 7175   | 7002   | 7010   | 7190   | 3948   | 3758   | 3777   | 3844   | 4126   | 4085   | 3953   | 4001  |
| K04835 methylaspartate ammonia-lyase [EC:4.3.1.2]                                                                              | 52     | 44     | 40     | 40     | 3      | 4      | 0      | 2      | 105    | 95     | 109    | 103   |
| K05606 methylmalonyl-CoA/ethylmalonyl-CoA epimerase [EC:5.1.99.1]                                                              | 287    | 276    | 345    | 291    | 832    | 861    | 851    | 888    | 681    | 579    | 632    | 656   |
| K07130 arylformamidase [EC:3.5.1.9]                                                                                            | 1003   | 934    | 847    | 867    | 537    | 475    | 426    | 542    | 339    | 339    | 350    | 383   |
| K07246 tartrate dehydrogenase/decarboxylase / D-malate dehydrogenase [EC:1.1.1.93 4.1.1.73 1.1.1.83]                           | 467    | 470    | 431    | 461    | 154    | 167    | 178    | 166    | 821    | 840    | 801    | 868   |
| K11472 glycolate oxidase FAD binding subunit                                                                                   | 2049   | 1906   | 1633   | 1820   | 1001   | 976    | 865    | 1061   | 660    | 655    | 584    | 638   |
| K11473 glycolate oxidase iron-sulfur subunit                                                                                   | 1792   | 1803   | 1602   | 1702   | 949    | 900    | 898    | 1001   | 701    | 639    | 632    | 633   |
| K11517 (S)-2-hydroxy-acid oxidase [EC:1.1.3.15]                                                                                | 0      | 0      | 2      | 0      | 0      | 0      | 0      | 0      | 0      | 0      | 0      | 0     |
| K14067 malate-CoA ligase subunit beta [EC:6.2.1.9]                                                                             | 0      | 0      | 0      | 0      | 0      | 0      | 0      | 0      | 0      | 1      | 0      | 0     |
| K15893 glycerate dehydrogenase [EC:1.1.1.29]                                                                                   | 0      | 0      | 3      | 0      | 0      | 0      | 0      | 0      | 2      | 5      | 3      | 4     |
| K15919 glyoxylate/hydroxypyruvate reductase [EC:1.1.1.79 1.1.1.81]                                                             | 6      | 1      | 2      | 0      | 2      | 5      | 3      | 1      | 3      | 5      | 8      | 0     |
| K17865 3-hydroxybutyryl-CoA dehydratase [EC:4.2.1.55]                                                                          | 14     | 16     | 10     | 9      | 0      | 2      | 0      | 2      | 121    | 81     | 95     | 81    |
| K18123 4-hydroxy-2-oxoglutarate aldolase [EC:4.1.3.16]                                                                         | 4      | 1      | 2      | 2      | 0      | 0      | 1      | 0      | 2      | 8      | 3      | 3     |
| K19268 methylaspartate mutase epsilon subunit [EC:5.4.99.1]                                                                    | 49     | 52     | 55     | 47     | 4      | 6      | 7      | 2      | 116    | 143    | 116    | 155   |
| K19312 acetyl-CoA/propionyl-CoA carboxylase carboxyl transferase subunit [EC:6.4.1.2 6.4.1.3 2.1.3.15]                         | 17     | 12     | 9      | 14     | 0      | 2      | 3      | 1      | 15     | 16     | 22     | 20    |

|                                                                                                                                                      |        |        |        |        |        |        |        |        |        |        |        |        |
|------------------------------------------------------------------------------------------------------------------------------------------------------|--------|--------|--------|--------|--------|--------|--------|--------|--------|--------|--------|--------|
| K05605 3-hydroxyisobutyryl-CoA hydrolase [EC:3.1.2.4]                                                                                                | 0      | 2      | 0      | 0      | 1      | 1      | 0      | 0      | 0      | 0      | 0      | 0      |
| K07250 4-aminobutyrate aminotransferase / (S)-3-amino-2-methylpropionate transaminase / 5-aminovalerate transaminase [EC:2.6.1.19 2.6.1.22 2.6.1.48] | 734    | 766    | 717    | 757    | 193    | 186    | 210    | 197    | 1689   | 1785   | 1611   | 1652   |
| K07511 enoyl-CoA hydratase [EC:4.2.1.17]                                                                                                             | 0      | 0      | 2      | 1      | 0      | 0      | 0      | 0      | 1      | 0      | 0      | 0      |
| K08325 NADP-dependent alcohol dehydrogenase [EC:1.1.-.-]                                                                                             | 1535   | 1559   | 1482   | 1559   | 2777   | 2916   | 2841   | 2880   | 2702   | 2590   | 2641   | 2548   |
| K09699 2-oxoisovalerate dehydrogenase E2 component (dihydrolipoyl transacylase) [EC:2.3.1.168]                                                       | 1217   | 1181   | 1058   | 1257   | 643    | 558    | 501    | 681    | 395    | 376    | 383    | 397    |
| K09788 2-methylaconitate isomerase [EC:5.3.3.-]                                                                                                      | 1552   | 1548   | 1442   | 1392   | 775    | 686    | 824    | 896    | 492    | 507    | 444    | 429    |
| K11264 methylmalonyl-CoA decarboxylase [EC:4.1.1.-]                                                                                                  | 0      | 0      | 0      | 0      | 11     | 8      | 3      | 3      | 2      | 3      | 0      | 0      |
| K11381 2-oxoisovalerate dehydrogenase E1 component [EC:1.2.4.4]                                                                                      | 1194   | 1302   | 1407   | 1331   | 4001   | 4056   | 4138   | 4040   | 2733   | 2770   | 2799   | 2600   |
| K13919 propanediol dehydratase medium subunit [EC:4.2.1.28]                                                                                          | 405    | 439    | 389    | 432    | 313    | 271    | 310    | 247    | 557    | 489    | 603    | 598    |
| K13920 propanediol dehydratase small subunit [EC:4.2.1.28]                                                                                           | 340    | 343    | 300    | 329    | 200    | 192    | 220    | 217    | 403    | 405    | 415    | 404    |
| K13921 L-propanol dehydrogenase                                                                                                                      | 728    | 733    | 727    | 778    | 435    | 485    | 432    | 457    | 958    | 906    | 970    | 955    |
| K13922 propionaldehyde dehydrogenase [EC:1.2.1.87]                                                                                                   | 1002   | 1096   | 1023   | 1077   | 639    | 658    | 626    | 596    | 1389   | 1314   | 1349   | 1412   |
| K13923 phosphate propanoyltransferase [EC:2.3.1.222]                                                                                                 | 321    | 407    | 274    | 364    | 239    | 305    | 236    | 267    | 447    | 483    | 438    | 482    |
| K14729 multifunctional beta-oxidation protein [EC:4.2.1.-.1.1.-]                                                                                     | 1      | 0      | 0      | 0      | 0      | 2      | 0      | 0      | 0      | 0      | 0      | 0      |
| K17489 methylmalonyl-CoA carboxyltransferase 12S subunit [EC:2.3.1.31]                                                                               | 17     | 9      | 7      | 12     | 1      | 0      | 2      | 2      | 7      | 15     | 18     | 28     |
| K18369 alcohol dehydrogenase [EC:1.1.1.-]                                                                                                            | 865    | 917    | 1009   | 960    | 1432   | 1404   | 1330   | 1328   | 1336   | 1315   | 1299   | 1395   |
| K18471 methylglyoxal reductase [EC:1.1.1.-]                                                                                                          | 482    | 478    | 461    | 465    | 390    | 400    | 390    | 359    | 744    | 798    | 696    | 730    |
| K19697 propionate kinase [EC:2.7.2.15]                                                                                                               | 716    | 720    | 688    | 802    | 430    | 432    | 449    | 467    | 928    | 971    | 890    | 1050   |
| K19709 acetate CoA-transferase [EC:2.8.3.8]                                                                                                          | 85     | 78     | 77     | 59     | 118    | 133    | 115    | 135    | 205    | 172    | 191    | 216    |
| K19745 acrylyl-CoA reductase (NADPH) [EC:1.3.1.-]                                                                                                    | 469    | 513    | 420    | 496    | 375    | 393    | 353    | 390    | 607    | 696    | 633    | 708    |
| K20143 acrylyl-CoA reductase (NADH) [EC:1.3.1.95]                                                                                                    | 3      | 2      | 0      | 0      | 0      | 0      | 2      | 0      | 19     | 15     | 10     | 14     |
| K20455 2-methylcitrate dehydratase (2-methyl-trans-aconitate forming) [EC:4.2.1.117]                                                                 | 2716   | 2810   | 2478   | 2598   | 1542   | 1344   | 1370   | 1497   | 836    | 783    | 709    | 748    |
| K20626 lactoyl-CoA dehydratase subunit alpha [EC:4.2.1.54]                                                                                           | 9      | 6      | 12     | 15     | 2      | 0      | 0      | 0      | 35     | 45     | 39     | 57     |
| K20627 lactoyl-CoA dehydratase subunit beta [EC:4.2.1.54]                                                                                            | 9      | 5      | 7      | 10     | 6      | 7      | 8      | 5      | 53     | 51     | 51     | 44     |
| K22214 propionyl-CoA:succinyl-CoA transferase [EC:2.8.3.-]                                                                                           | 0      | 0      | 0      | 0      | 14     | 9      | 6      | 23     | 9      | 4      | 3      | 1      |
| K23259 isopropanol dehydrogenase (NADP+) [EC:1.1.1.80]                                                                                               | 55     | 49     | 63     | 66     | 6      | 9      | 10     | 6      | 16     | 9      | 9      | 7      |
| ko0050 Butanoate metabolism                                                                                                                          | 135646 | 135907 | 133457 | 136759 | 114541 | 115903 | 114379 | 115720 | 128075 | 130074 | 127806 | 130251 |
| K00004 (R,R)-butanediol dehydrogenase / meso-butanediol dehydrogenase / diacetyl reductase [EC:1.1.1.4 1.1.1.-.1.1.1.303]                            | 3444   | 3483   | 3113   | 3297   | 1824   | 1759   | 1697   | 1874   | 1076   | 1003   | 1054   | 1109   |
| K00019 3-hydroxybutyrate dehydrogenase [EC:1.1.1.30]                                                                                                 | 1498   | 1522   | 1433   | 1481   | 830    | 811    | 726    | 800    | 793    | 912    | 898    | 970    |
| K00022 3-hydroxyacyl-CoA dehydrogenase [EC:1.1.1.35]                                                                                                 | 0      | 1      | 0      | 0      | 0      | 0      | 0      | 0      | 1      | 0      | 1      | 0      |
| K00043 4-hydroxybutyrate dehydrogenase [EC:1.1.1.61]                                                                                                 | 0      | 1      | 0      | 0      | 0      | 0      | 0      | 0      | 0      | 1      | 1      | 0      |
| K00074 3-hydroxybutyryl-CoA dehydrogenase [EC:1.1.1.157]                                                                                             | 5128   | 5060   | 4541   | 4899   | 2552   | 2575   | 2367   | 2719   | 3579   | 3720   | 3337   | 3574   |
| K00100 butanol dehydrogenase [EC:1.1.1.-]                                                                                                            | 1738   | 1689   | 1622   | 1580   | 834    | 913    | 861    | 940    | 597    | 586    | 619    | 681    |
| K00135 succinate-semialdehyde dehydrogenase / glutarate-semialdehyde dehydrogenase [EC:1.2.1.16 1.2.1.79 1.2.1.21.20]                                | 6810   | 6633   | 6518   | 6842   | 3726   | 3547   | 3634   | 3664   | 4741   | 4836   | 4859   | 5036   |
| K00139 succinate-semialdehyde dehydrogenase [EC:1.2.1.24]                                                                                            | 1      | 0      | 0      | 1      | 0      | 0      | 0      | 0      | 0      | 0      | 0      | 0      |
| K00209 enoyl-[acyl-carrier protein] reductase / trans-2-enoyl-CoA reductase (NAD+) [EC:1.3.1.9 1.3.1.44]                                             | 1825   | 1887   | 1679   | 1778   | 986    | 959    | 898    | 1029   | 630    | 663    | 627    | 641    |
| K00634 phosphate butyryltransferase [EC:2.3.1.19]                                                                                                    | 490    | 477    | 584    | 546    | 907    | 821    | 877    | 760    | 674    | 710    | 743    | 709    |
| K00929 butyrate kinase [EC:2.7.2.7]                                                                                                                  | 1473   | 1531   | 1662   | 1468   | 2622   | 2513   | 2600   | 2609   | 2351   | 2331   | 2333   | 2340   |
| K01027 3-oxoacid CoA-transferase [EC:2.8.3.5]                                                                                                        | 3      | 5      | 5      | 3      | 9      | 11     | 8      | 7      | 6      | 10     | 10     | 6      |
| K01028 3-oxoacid CoA-transferase subunit A [EC:2.8.3.5]                                                                                              | 535    | 564    | 506    | 593    | 365    | 405    | 378    | 431    | 568    | 607    | 549    | 584    |
| K01029 3-oxoacid CoA-transferase subunit B [EC:2.8.3.5]                                                                                              | 562    | 526    | 450    | 542    | 313    | 320    | 347    | 333    | 470    | 568    | 497    | 534    |
| K01039 glutaconate CoA-transferase, subunit A [EC:2.8.3.12]                                                                                          | 639    | 643    | 562    | 667    | 357    | 371    | 367    | 379    | 216    | 174    | 199    | 208    |
| K01040 glutaconate CoA-transferase, subunit B [EC:2.8.3.12]                                                                                          | 1338   | 1295   | 1227   | 1187   | 814    | 755    | 702    | 720    | 438    | 431    | 358    | 417    |
| K01575 acetolactate decarboxylase [EC:4.1.1.5]                                                                                                       | 426    | 473    | 451    | 304    | 426    | 330    | 364    | 277    | 640    | 634    | 594    | 666    |
| K01580 glutamate decarboxylase [EC:4.1.1.15]                                                                                                         | 1039   | 1071   | 1083   | 1066   | 3318   | 3331   | 3323   | 3374   | 2576   | 2482   | 2624   | 2516   |
| K01615 glutacetyl-CoA decarboxylase subunit alpha [EC:7.2.4.5]                                                                                       | 25     | 35     | 36     | 30     | 67     | 79     | 76     | 89     | 26     | 37     | 40     | 36     |
| K01640 hydroxymethylglutaryl-CoA lyase [EC:4.1.3.4]                                                                                                  | 1325   | 1249   | 1153   | 1244   | 662    | 657    | 638    | 652    | 447    | 425    | 397    | 373    |
| K01641 hydroxymethylglutaryl-CoA synthase [EC:2.3.3.10]                                                                                              | 56     | 93     | 87     | 56     | 19     | 21     | 27     | 20     | 70     | 113    | 81     | 89     |
| K01652 acetolactate synthase I/II/III large subunit [EC:2.2.1.6]                                                                                     | 16148  | 16395  | 15882  | 16536  | 11375  | 11742  | 11289  | 11370  | 13807  | 14064  | 13638  | 14040  |
| K01653 acetolactate synthase I/III small subunit [EC:2.2.1.6]                                                                                        | 2139   | 2147   | 2225   | 2167   | 2163   | 2234   | 2198   | 2149   | 2281   | 2397   | 2291   | 2373   |
| K01715 enoyl-CoA hydratase [EC:4.2.1.17]                                                                                                             | 178    | 202    | 190    | 225    | 132    | 114    | 114    | 119    | 260    | 357    | 355    | 361    |
| K01799 maleate isomerase [EC:5.2.1.1]                                                                                                                | 3      | 2      | 2      | 3      | 0      | 0      | 0      | 0      | 3      | 0      | 2      | 1      |
| K01907 acetoacetyl-CoA synthetase [EC:6.2.1.16]                                                                                                      | 2504   | 2541   | 2409   | 2385   | 1287   | 1314   | 1136   | 1379   | 796    | 745    | 688    | 726    |
| K03366 meso-butanediol dehydrogenase / (S,S)-butanediol dehydrogenase / diacetyl reductase [EC:1.1.1.-.1.1.76 1.1.1.304]                             | 868    | 834    | 869    | 857    | 771    | 899    | 840    | 778    | 576    | 616    | 578    | 692    |
| K03821 polyhydroxyalkanoate synthase subunit PhaC [EC:2.3.1.-]                                                                                       | 5497   | 5392   | 5402   | 5410   | 2994   | 2931   | 2851   | 3101   | 1824   | 1632   | 1603   | 1702   |
| K07516 3-hydroxyacyl-CoA dehydrogenase [EC:1.1.1.35]                                                                                                 | 11     | 3      | 5      | 1      | 16     | 13     | 24     | 20     | 1      | 4      | 2      | 7      |
| K07518 hydroxybutyrate-dimer hydrolase [EC:3.1.1.122]                                                                                                | 0      | 0      | 0      | 0      | 0      | 0      | 0      | 0      | 0      | 2      | 0      | 0      |
| K08318 4-hydroxybutyrate dehydrogenase / sulfolactaldehyde 3-reductase [EC:1.1.1.61 1.1.1.373]                                                       | 263    | 248    | 227    | 235    | 348    | 395    | 364    | 352    | 66     | 67     | 98     | 79     |
| K08324 succinate-semialdehyde dehydrogenase [EC:1.2.1.16 1.2.1.24]                                                                                   | 815    | 685    | 639    | 827    | 553    | 589    | 521    | 529    | 1000   | 1118   | 985    | 1134   |
| K11258 acetolactate synthase II small subunit [EC:2.2.1.6]                                                                                           | 179    | 151    | 146    | 175    | 122    | 133    | 119    | 115    | 220    | 198    | 173    | 230    |
| K14268 5-aminovalerate/4-aminobutyrate aminotransferase [EC:2.6.1.48 2.6.1.19]                                                                       | 2343   | 2184   | 2110   | 2276   | 1241   | 1257   | 1264   | 1354   | 679    | 688    | 645    | 610    |
| K14534 4-hydroxybutyryl-CoA dehydratase / vinylacetyl-CoA-Delta-isomerase [EC:4.2.1.120 5.3.3.3]                                                     | 780    | 723    | 818    | 827    | 127    | 121    | 133    | 109    | 1441   | 1486   | 1568   | 1619   |
| K16871 4-aminobutyrate--pyruvate transaminase [EC:2.6.1.96]                                                                                          | 14     | 17     | 16     | 27     | 0      | 2      | 2      | 0      | 12     | 12     | 15     | 8      |
| K18009 meso-butanediol dehydrogenase / (S,S)-butanediol dehydrogenase / diacetyl reductase [EC:1.1.1.-.1.1.76 1.1.1.304]                             | 1      | 2      | 2      | 3      | 2      | 4      | 3      | 3      | 2      | 1      | 1      | 0      |
| K18119 succinate-semialdehyde dehydrogenase [EC:1.2.1.76]                                                                                            | 3      | 12     | 2      | 8      | 1      | 0      | 2      | 0      | 0      | 3      | 0      | 7      |
| K18120 4-hydroxybutyrate dehydrogenase [EC:1.1.1.61]                                                                                                 | 81     | 53     | 56     | 56     | 19     | 20     | 15     | 16     | 17     | 23     | 38     | 34     |
| K18122 4-hydroxybutyrate CoA-transferase [EC:2.8.3.-]                                                                                                | 65     | 72     | 72     | 74     | 35     | 49     | 29     | 36     | 39     | 55     | 47     | 45     |
| K23351 glutacetyl-CoA/methylmalonyl-CoA decarboxylase subunit gamma                                                                                  | 417    | 444    | 456    | 432    | 963    | 903    | 899    | 908    | 721    | 843    | 788    | 670    |
| K23352 glutacetyl-CoA/methylmalonyl-CoA decarboxylase subunit delta                                                                                  | 198    | 251    | 239    | 213    | 49     | 49     | 43     | 53     | 175    | 249    | 223    | 201    |
| ko0060 C5-Branched dibasic acid metabolism                                                                                                           | 37781  | 38036  | 37586  | 38769  | 35226  | 35582  | 34868  | 34361  | 36217  | 36500  | 35721  | 36542  |
| K00052 3-isopropylmalate dehydrogenase [EC:1.1.1.85]                                                                                                 | 2570   | 2661   | 2578   | 2686   | 3458   | 3326   | 3436   | 3182   | 3374   | 3477   | 3304   | 3389   |
| K01703 3-isopropylmalate/(R)-2-methylmalate dehydratase large subunit [EC:4.2.1.33 4.2.1.35]                                                         | 4521   | 4354   | 4339   | 4552   | 4913   | 5049   | 4994   | 4747   | 4882   | 4859   | 4710   | 4855   |
| K01704 3-isopropylmalate/(R)-2-methylmalate dehydratase small subunit [EC:4.2.1.33 4.2.1.35]                                                         | 1899   | 1885   | 1875   | 1955   | 2206   | 2229   | 2088   | 2223   | 1894   | 2033   | 2112   | 1963   |
| K09011 (R)-citramalate synthase [EC:2.3.1.182]                                                                                                       | 751    | 807    | 800    | 766    | 2452   | 2524   | 2365   | 2523   | 1770   | 1703   | 1705   | 1687   |
| K10218 4-hydroxy-4-methyl-2-oxoglutarate aldolase [EC:4.1.3.17]                                                                                      | 301    | 329    | 292    | 358    | 106    | 95     | 87     | 89     | 633    | 605    | 623    | 651    |
| K18288 itaconate CoA-transferase [EC:2.8.3.-]                                                                                                        | 3      | 2      | 1      | 0      | 0      | 0      | 1      | 1      | 3      | 4      | 3      | 6      |
| K18289 itaconate CoA-transferase [EC:2.8.3.-.2.8.3.22]                                                                                               | 1841   | 1785   | 1804   | 1871   | 1022   | 952    | 875    | 974    | 537    | 481    | 526    | 574    |
| K18291 itaconyl-CoA hydratase / mesoacetyl-CoA hydratase [EC:4.2.1.156 4.2.1.-]                                                                      | 1174   | 1149   | 1161   | 1190   | 619    | 628    | 637    | 631    | 392    | 346    | 323    | 373    |
| K18292 (S)-citramalyl-CoA lyase [EC:4.1.3.25]                                                                                                        | 593    | 657    | 638    | 686    | 385    | 395    | 352    | 357    | 225    | 216    | 174    | 199    |
| K22004 trans-aconitate decarboxylase [EC:4.1.1.-]                                                                                                    | 0      | 0      | 0      | 0      | 0      | 0      | 0      | 1      | 0      | 0      | 0      | 0      |
| ko00562 inositol phosphate metabolism                                                                                                                | 25821  | 26006  | 25548  | 26338  | 17182  | 17350  | 16758  | 17402  | 27334  | 28147  | 27205  | 28180  |
| K00010 myo-inositol 2-dehydrogenase / D-chiro-inositol 1-dehydrogenase [EC:1.1.1.18 1.1.1.369]                                                       | 1408   | 1350   | 1304   | 1378   | 282    | 287    | 299    | 281    | 2542   | 2713   | 2549   | 2702   |
| K00889 1-phosphatidylinositol-4-phosphate 5-kinase [EC:2.7.1.68]                                                                                     | 19     | 18     | 24     | 22     | 75     | 67     | 0      | 0      | 47     | 57     | 69     | 43     |
| K01092 myo-inositol-1(or 4)-monophosphatase [EC:3.1.3.25]                                                                                            | 2188   | 2392   | 2374   | 2397   | 2796   | 2862   | 2851   | 2860   | 3783   | 3738   | 3833   | 3876   |
| K01093 4-phytase / acid phosphatase [EC:3.1.3.26 3.1.3.2]                                                                                            | 432    | 537    | 445    | 505    | 153    | 125    | 115    | 109    | 1025   | 1067   | 985    | 1022   |
| K01114 phospholipase C [EC:3.1.4.3]                                                                                                                  | 6513   | 6572   | 6098   | 6453   | 3388   | 3540   | 3352   | 3634   | 2143   | 1954   | 1808   | 2070   |
| K01771 1-phosphatidylinositol phosphodiesterase [EC:4.6.1.13]                                                                                        | 2      | 0      | 2      | 1      | 1      | 5      | 11     | 17     | 19     | 11     | 12     | 7      |
| K01858 myo-inositol-1-phosphate synthase [EC:5.5.1.4]                                                                                                | 804    | 815    | 981    | 800    | 2615   | 2637   | 2548   | 2656   | 1886   | 1832   | 1970   | 1759   |
| K03335 inosose dehydratase [EC:4.2.1.44]                                                                                                             | 1403   | 1322   | 1315   | 1416   | 355    | 330    | 291    | 352    | 2619   | 2923   | 2752   | 2996   |
| K03336 3D-(3,5/4)-trihydroxycyclohexane-1,2-dione acylhydrolase (deacylizing) [EC:3.7.1.22]                                                          | 1345   | 1287   | 1237   | 1319   | 292    | 276    | 260    | 258    | 2242   | 2401   | 2196   | 2405   |
| K03337 5-deoxy-glucuronate isomerase [EC:5.3.1.30]                                                                                                   | 506    | 465    | 474    | 531    | 123    | 107    | 117    | 89     | 838    | 901    | 826    | 916    |
| K03339 5-dehydro-2-deoxygluconokinase [EC:2.7.1.92]                                                                                                  | 1003   | 1010   | 1025   | 1075   | 268    | 279    | 257    | 240    | 1908   | 2041   | 1992   | 208    |

|                                                                                                                                    |        |        |        |        |        |        |        |        |        |        |        |        |
|------------------------------------------------------------------------------------------------------------------------------------|--------|--------|--------|--------|--------|--------|--------|--------|--------|--------|--------|--------|
| K00406 cytochrome c oxidase cbb3-type subunit III                                                                                  | 1334   | 1269   | 1349   | 1174   | 697    | 688    | 604    | 624    | 429    | 413    | 352    | 375    |
| K00407 cytochrome c oxidase cbb3-type subunit IV                                                                                   | 513    | 481    | 484    | 504    | 268    | 283    | 262    | 264    | 164    | 156    | 165    | 146    |
| K00410 ubiquinol-cytochrome c reductase cytochrome b/c1 subunit                                                                    | 0      | 0      | 0      | 0      | 0      | 1      | 0      | 0      | 0      | 0      | 0      | 0      |
| K00411 ubiquinol-cytochrome c reductase iron-sulfur subunit [EC:7.1.1.8]                                                           | 810    | 772    | 828    | 843    | 548    | 545    | 478    | 471    | 310    | 295    | 276    | 259    |
| K00412 ubiquinol-cytochrome c reductase cytochrome b subunit                                                                       | 1861   | 1865   | 1926   | 1879   | 1034   | 1152   | 1052   | 1024   | 620    | 583    | 604    | 575    |
| K00413 ubiquinol-cytochrome c reductase cytochrome c1 subunit                                                                      | 997    | 1054   | 1090   | 1087   | 591    | 600    | 575    | 557    | 331    | 378    | 288    | 312    |
| K00424 cytochrome bd-I ubiquinol oxidase subunit X [EC:7.1.1.7]                                                                    | 81     | 50     | 56     | 68     | 53     | 50     | 63     | 43     | 85     | 105    | 98     | 86     |
| K00425 cytochrome bd ubiquinol oxidase subunit I [EC:7.1.1.7]                                                                      | 5480   | 5553   | 5511   | 5510   | 5784   | 5813   | 5934   | 5746   | 7072   | 7205   | 7038   | 7319   |
| K00426 cytochrome bd ubiquinol oxidase subunit II [EC:7.1.1.7]                                                                     | 2959   | 2867   | 2991   | 3017   | 3849   | 3798   | 3878   | 3585   | 4715   | 4781   | 4544   | 4698   |
| K00937 polyphosphate kinase [EC:2.7.4.1]                                                                                           | 6997   | 7138   | 7210   | 7038   | 6897   | 6880   | 7000   | 6953   | 6117   | 5929   | 6021   | 6240   |
| K01507 inorganic pyrophosphatase [EC:3.6.1.1]                                                                                      | 1496   | 1529   | 1406   | 1505   | 849    | 861    | 863    | 864    | 1326   | 1449   | 1351   | 1374   |
| K01535 H <sup>+</sup> -transporting ATPase [EC:7.1.2.1]                                                                            | 1      | 5      | 0      | 1      | 0      | 0      | 0      | 0      | 0      | 0      | 0      | 0      |
| K02107 V/A-type H <sup>+</sup> /Na <sup>+</sup> -transporting ATPase subunit G/H                                                   | 21     | 20     | 16     | 22     | 5      | 8      | 3      | 1      | 21     | 30     | 24     | 23     |
| K02108 F-type H <sup>+</sup> -transporting ATPase subunit a                                                                        | 3480   | 3448   | 3579   | 3489   | 3547   | 3695   | 3655   | 3531   | 3459   | 3383   | 3469   | 3219   |
| K02109 F-type H <sup>+</sup> -transporting ATPase subunit b                                                                        | 1309   | 1405   | 1420   | 1390   | 1419   | 1309   | 1334   | 1293   | 1368   | 1222   | 1300   | 1215   |
| K02110 F-type H <sup>+</sup> -transporting ATPase subunit c                                                                        | 912    | 941    | 961    | 977    | 765    | 765    | 746    | 710    | 801    | 801    | 820    | 785    |
| K02111 F-type H <sup>+</sup> /Na <sup>+</sup> -transporting ATPase subunit alpha [EC:7.1.2.2 7.2.2.1]                              | 6594   | 6558   | 6528   | 6717   | 5992   | 5937   | 6007   | 6005   | 6024   | 5856   | 6208   | 6156   |
| K02112 F-type H <sup>+</sup> /Na <sup>+</sup> -transporting ATPase subunit beta [EC:7.1.2.2 7.2.2.1]                               | 5890   | 5915   | 6324   | 6109   | 5721   | 5799   | 5765   | 5756   | 5414   | 5731   | 5557   | 5672   |
| K02113 F-type H <sup>+</sup> -transporting ATPase subunit delta                                                                    | 2032   | 2047   | 2064   | 2153   | 2016   | 2074   | 2171   | 1973   | 1919   | 2025   | 1985   | 1931   |
| K02114 F-type H <sup>+</sup> -transporting ATPase subunit epsilon                                                                  | 1484   | 1561   | 1664   | 1533   | 1374   | 1311   | 1162   | 1234   | 1277   | 1285   | 1287   | 1235   |
| K02115 F-type H <sup>+</sup> -transporting ATPase subunit gamma                                                                    | 3407   | 3367   | 3468   | 3463   | 3059   | 3303   | 3183   | 3135   | 3288   | 3359   | 3264   | 3258   |
| K02117 V/A-type H <sup>+</sup> /Na <sup>+</sup> -transporting ATPase subunit A [EC:7.1.2.2 7.2.2.1]                                | 2616   | 2519   | 2787   | 2696   | 3612   | 3909   | 3931   | 3644   | 3812   | 3941   | 3968   | 3900   |
| K02118 V/A-type H <sup>+</sup> /Na <sup>+</sup> -transporting ATPase subunit B                                                     | 2186   | 2117   | 2181   | 2127   | 3166   | 3183   | 3224   | 3030   | 3171   | 3295   | 3139   | 3056   |
| K02119 V/A-type H <sup>+</sup> /Na <sup>+</sup> -transporting ATPase subunit C                                                     | 849    | 753    | 836    | 813    | 203    | 208    | 248    | 200    | 712    | 759    | 663    | 800    |
| K02120 V/A-type H <sup>+</sup> /Na <sup>+</sup> -transporting ATPase subunit D                                                     | 976    | 993    | 980    | 946    | 1307   | 1235   | 1259   | 1374   | 1341   | 1334   | 1450   | 1248   |
| K02121 V/A-type H <sup>+</sup> /Na <sup>+</sup> -transporting ATPase subunit E                                                     | 340    | 425    | 433    | 411    | 998    | 1052   | 1048   | 1038   | 733    | 780    | 854    | 810    |
| K02122 V/A-type H <sup>+</sup> /Na <sup>+</sup> -transporting ATPase subunit F                                                     | 315    | 315    | 287    | 303    | 85     | 81     | 95     | 76     | 321    | 272    | 298    | 284    |
| K02123 V/A-type H <sup>+</sup> /Na <sup>+</sup> -transporting ATPase subunit I                                                     | 2506   | 2549   | 2727   | 2650   | 4058   | 4216   | 4044   | 3975   | 3810   | 3912   | 3938   | 3944   |
| K02124 V/A-type H <sup>+</sup> /Na <sup>+</sup> -transporting ATPase subunit K                                                     | 599    | 600    | 591    | 594    | 1049   | 1056   | 1043   | 999    | 890    | 932    | 978    | 915    |
| K02126 F-type H <sup>+</sup> -transporting ATPase subunit a                                                                        | 0      | 2      | 0      | 0      | 0      | 0      | 0      | 0      | 0      | 0      | 0      | 0      |
| K02128 F-type H <sup>+</sup> -transporting ATPase subunit c                                                                        | 0      | 2      | 0      | 0      | 0      | 0      | 0      | 0      | 0      | 0      | 0      | 0      |
| K02132 F-type H <sup>+</sup> -transporting ATPase subunit alpha                                                                    | 3      | 3      | 11     | 6      | 1      | 2      | 1      | 0      | 12     | 6      | 15     | 5      |
| K02133 F-type H <sup>+</sup> -transporting ATPase subunit beta [EC:7.1.2.2]                                                        | 2      | 1      | 0      | 1      | 3      | 3      | 3      | 1      | 0      | 1      | 3      | 2      |
| K02145 V-type H <sup>+</sup> -transporting ATPase subunit A [EC:7.1.2.2]                                                           | 0      | 0      | 0      | 0      | 0      | 1      | 0      | 0      | 0      | 0      | 0      | 0      |
| K02147 V-type H <sup>+</sup> -transporting ATPase subunit B                                                                        | 0      | 0      | 0      | 1      | 0      | 0      | 0      | 0      | 0      | 0      | 0      | 0      |
| K02256 cytochrome c oxidase subunit 1 [EC:1.9.3.1]                                                                                 | 0      | 0      | 0      | 0      | 0      | 1      | 3      | 0      | 2      | 0      | 0      | 0      |
| K02257 heme o synthase [EC:2.5.1.141]                                                                                              | 2834   | 2634   | 2610   | 2714   | 1595   | 1628   | 1539   | 1675   | 1489   | 1512   | 1339   | 1572   |
| K02258 cytochrome c oxidase assembly protein subunit 11                                                                            | 819    | 864    | 905    | 885    | 450    | 447    | 414    | 486    | 280    | 316    | 276    | 261    |
| K02259 cytochrome c oxidase assembly protein subunit 15                                                                            | 1687   | 1642   | 1668   | 1596   | 903    | 885    | 761    | 802    | 541    | 555    | 555    | 480    |
| K02262 cytochrome c oxidase subunit 3                                                                                              | 0      | 0      | 0      | 0      | 1      | 0      | 0      | 0      | 0      | 0      | 0      | 0      |
| K02274 cytochrome c oxidase subunit I [EC:1.9.3.1]                                                                                 | 2751   | 2830   | 2831   | 2868   | 1674   | 1633   | 1516   | 1621   | 1028   | 994    | 907    | 909    |
| K02275 cytochrome c oxidase subunit II [EC:1.9.3.1]                                                                                | 1468   | 1566   | 1355   | 1422   | 842    | 777    | 760    | 861    | 545    | 460    | 434    | 477    |
| K02276 cytochrome c oxidase subunit III [EC:1.9.3.1]                                                                               | 1618   | 1508   | 1462   | 1537   | 806    | 874    | 765    | 859    | 529    | 459    | 504    | 503    |
| K02277 cytochrome c oxidase subunit IV [EC:1.9.3.1]                                                                                | 0      | 1      | 0      | 0      | 1      | 0      | 0      | 0      | 0      | 0      | 0      | 0      |
| K02297 cytochrome o ubiquinol oxidase subunit I [EC:7.1.1.3]                                                                       | 1168   | 1118   | 1171   | 1138   | 730    | 721    | 740    | 782    | 976    | 1086   | 992    | 1022   |
| K02298 cytochrome o ubiquinol oxidase subunit II [EC:7.1.1.3]                                                                      | 4065   | 3975   | 4072   | 4192   | 2380   | 2492   | 2400   | 2439   | 2624   | 2635   | 2616   | 2544   |
| K02299 cytochrome o ubiquinol oxidase subunit III                                                                                  | 1231   | 1290   | 1277   | 1318   | 910    | 803    | 705    | 787    | 844    | 858    | 780    | 840    |
| K02300 cytochrome o ubiquinol oxidase subunit IV                                                                                   | 510    | 518    | 534    | 542    | 288    | 363    | 352    | 334    | 356    | 401    | 347    | 375    |
| K02826 cytochrome aa3-600 menaquinol oxidase subunit II [EC:7.1.1.5]                                                               | 0      | 0      | 0      | 0      | 0      | 0      | 0      | 2      | 0      | 0      | 0      | 0      |
| K02827 cytochrome aa3-600 menaquinol oxidase subunit I [EC:7.1.1.5]                                                                | 1      | 0      | 0      | 0      | 0      | 0      | 0      | 0      | 0      | 0      | 1      | 0      |
| K02828 cytochrome aa3-600 menaquinol oxidase subunit III [EC:7.1.1.5]                                                              | 1      | 0      | 0      | 1      | 0      | 0      | 0      | 1      | 0      | 0      | 0      | 0      |
| K02829 cytochrome aa3-600 menaquinol oxidase subunit IV [EC:7.1.1.5]                                                               | 0      | 0      | 0      | 1      | 0      | 0      | 0      | 1      | 0      | 0      | 0      | 0      |
| K03878 NADH-ubiquinone oxidoreductase chain 1 [EC:7.1.1.2]                                                                         | 0      | 0      | 2      | 0      | 2      | 0      | 0      | 0      | 0      | 0      | 0      | 0      |
| K03881 NADH-ubiquinone oxidoreductase chain 4 [EC:7.1.1.2]                                                                         | 0      | 0      | 0      | 0      | 0      | 0      | 0      | 0      | 0      | 0      | 1      | 0      |
| K03883 NADH-ubiquinone oxidoreductase chain 5 [EC:7.1.1.2]                                                                         | 0      | 0      | 0      | 0      | 0      | 0      | 2      | 3      | 0      | 2      | 1      | 0      |
| K03885 NADH dehydrogenase [EC:1.6.99.3]                                                                                            | 5318   | 5498   | 5154   | 5339   | 5243   | 5237   | 5092   | 5163   | 4225   | 4045   | 4222   | 4154   |
| K03888 menaquinol-cytochrome c reductase cytochrome b/c subunit                                                                    | 2      | 0      | 1      | 0      | 0      | 0      | 0      | 0      | 0      | 0      | 0      | 1      |
| K03934 NADH dehydrogenase (ubiquinone) Fe-S protein 1 [EC:7.1.1.2 1.6.99.3]                                                        | 0      | 0      | 0      | 0      | 0      | 0      | 0      | 0      | 0      | 0      | 0      | 3      |
| K05576 NAD(P)H-quinone oxidoreductase subunit 4L [EC:7.1.1.2]                                                                      | 0      | 0      | 0      | 0      | 1      | 1      | 0      | 0      | 0      | 1      | 0      | 1      |
| K05577 NAD(P)H-quinone oxidoreductase subunit 5 [EC:7.1.1.2]                                                                       | 0      | 1      | 0      | 0      | 0      | 0      | 0      | 0      | 0      | 0      | 0      | 0      |
| K05587 bidirectional [NiFe] hydrogenase diaphorase subunit [EC:7.1.1.2]                                                            | 0      | 0      | 0      | 1      | 1      | 0      | 0      | 0      | 0      | 0      | 1      | 1      |
| K05588 bidirectional [NiFe] hydrogenase diaphorase subunit [EC:7.1.1.2]                                                            | 1      | 2      | 1      | 1      | 0      | 0      | 0      | 0      | 0      | 0      | 0      | 0      |
| K06019 pyrophosphatase PpaX [EC:3.6.1.1]                                                                                           | 23     | 31     | 19     | 22     | 6      | 3      | 2      | 0      | 37     | 41     | 52     | 42     |
| K13378 NADH-quinone oxidoreductase subunit C/D [EC:7.1.1.2]                                                                        | 4220   | 4253   | 4392   | 4509   | 5441   | 5591   | 5568   | 5468   | 4731   | 4770   | 4478   | 4604   |
| K15862 cytochrome c oxidase cbb3-type subunit V/II [EC:1.9.3.1]                                                                    | 2      | 0      | 1      | 0      | 1      | 0      | 2      | 0      | 1      | 4      | 2      | 1      |
| K15986 manganese-dependent inorganic pyrophosphatase [EC:3.6.1.1]                                                                  | 1275   | 1326   | 1365   | 1326   | 707    | 765    | 793    | 718    | 907    | 1137   | 995    | 1072   |
| K22468 polyphosphate kinase [EC:2.7.4.1]                                                                                           | 2648   | 2550   | 2396   | 2627   | 1493   | 1630   | 1413   | 1538   | 1347   | 1302   | 1383   | 1352   |
| K22501 cytochrome bd-II ubiquinol oxidase subunit AppX [EC:7.1.1.7]                                                                | 0      | 2      | 0      | 0      | 3      | 0      | 0      | 3      | 4      | 3      | 2      | 4      |
| ko00195 Photosynthesis                                                                                                             | 25078  | 25242  | 26008  | 25831  | 23893  | 24193  | 24023  | 23637  | 23559  | 23662  | 23890  | 23471  |
| ko00710 Carbon fixation in photosynthetic organisms                                                                                | 70353  | 70765  | 71165  | 70998  | 72378  | 73942  | 73301  | 71665  | 77711  | 78355  | 77439  | 77675  |
| K00855 phosphoribulokinase [EC:2.7.1.19]                                                                                           | 539    | 523    | 533    | 525    | 354    | 428    | 394    | 378    | 657    | 756    | 667    | 764    |
| K11214 sedoheptulokinase [EC:2.7.1.14]                                                                                             | 1      | 0      | 2      | 2      | 0      | 0      | 0      | 0      | 7      | 3      | 0      | 0      |
| K14454 aspartate aminotransferase, cytoplasmic [EC:2.6.1.1]                                                                        | 0      | 1      | 0      | 0      | 0      | 0      | 0      | 0      | 0      | 0      | 0      | 0      |
| K14455 aspartate aminotransferase, mitochondrial [EC:2.6.1.1]                                                                      | 0      | 0      | 0      | 0      | 1      | 0      | 0      | 0      | 0      | 1      | 0      | 0      |
| ko00720 Carbon fixation pathways in prokaryotes                                                                                    | 143258 | 143346 | 143547 | 144074 | 155127 | 157183 | 156797 | 156520 | 153867 | 154439 | 154047 | 153805 |
| K00194 acetyl-CoA decarboxylase/synthase, CODH/ACS complex subunit delta [EC:2.1.1.245]                                            | 24     | 36     | 29     | 54     | 19     | 31     | 29     | 36     | 90     | 111    | 90     | 114    |
| K00196 anaerobic carbon-monoxide dehydrogenase iron sulfur subunit                                                                 | 87     | 78     | 68     | 86     | 37     | 41     | 119    | 128    | 64     | 68     | 76     | 76     |
| K00197 acetyl-CoA decarboxylase/synthase, CODH/ACS complex subunit gamma [EC:2.1.1.245]                                            | 76     | 49     | 43     | 42     | 59     | 42     | 35     | 53     | 127    | 177    | 130    | 151    |
| K00198 anaerobic carbon-monoxide dehydrogenase catalytic subunit [EC:1.2.7.4]                                                      | 317    | 304    | 321    | 328    | 101    | 93     | 91     | 80     | 609    | 649    | 581    | 565    |
| K00297 methylenetetrahydrofolate reductase (NADPH) [EC:1.5.1.20]                                                                   | 3363   | 3383   | 3519   | 3382   | 3530   | 3539   | 3691   | 3747   | 3378   | 3132   | 3176   | 3155   |
| K01491 methylenetetrahydrofolate dehydrogenase (NADP <sup>+</sup> ) / methylnetetrahydrofolate cyclohydrolase [EC:1.5.1.5 3.5.4.9] | 2495   | 2524   | 2501   | 2444   | 2967   | 2892   | 2862   | 2850   | 2795   | 2679   | 2741   | 2709   |
| K01938 formate--tetrahydrofolate ligase [EC:6.3.4.3]                                                                               | 1952   | 1977   | 2051   | 1957   | 3553   | 3585   | 3732   | 3511   | 3430   | 3406   | 3202   | 3300   |
| K05299 formate dehydrogenase (NADP <sup>+</sup> ) alpha subunit [EC:1.17.1.10]                                                     | 9      | 9      | 11     | 8      | 4      | 6      | 6      | 8      | 16     | 19     | 13     | 13     |
| K14138 acetyl-CoA synthase [EC:2.3.1.169]                                                                                          | 101    | 83     | 87     | 102    | 52     | 52     | 56     | 48     | 228    | 288    | 230    | 258    |
| K14470 2-methylfumaryl-CoA isomerase [EC:5.4.1.3]                                                                                  | 0      | 0      | 0      | 1      | 0      | 0      | 0      | 0      | 1      | 0      | 1      | 0      |
| K15016 enoyl-CoA hydratase / 3-hydroxyacyl-CoA dehydrogenase [EC:4.2.1.17 1.1.1.35]                                                | 5      | 2      | 2      | 1      | 1      | 1      | 1      | 0      | 2      | 5      | 6      | 6      |
| K15019 3-hydroxypropionyl-coenzyme A dehydratase [EC:4.2.1.116]                                                                    | 0      | 2      | 2      | 7      | 0      | 3      | 2      | 1      | 1      | 3      | 2      | 1      |
| K15020 acryloyl-coenzyme A reductase [EC:1.3.1.84]                                                                                 | 0      | 0      | 0      | 0      | 0      | 0      | 0      | 1      | 0      | 0      | 0      | 0      |
| K15022 formate dehydrogenase (NADP <sup>+</sup> ) beta subunit [EC:1.17.1.10]                                                      | 76     | 72     | 79     | 79     | 119    | 91     | 95     | 96     | 106    | 130    | 127    | 129    |
| K15023 5-methyltetrahydrofolate corrinoid/iron sulfur protein methyltransferase [EC:2.1.1.258]                                     | 43     | 29     | 44     | 35     | 35     | 36     | 29     | 28     | 90     | 91     | 102    | 87     |
| K15039 3-hydroxypropionate dehydrogenase (NADP <sup>+</sup> ) [EC:1.1.1.298]                                                       | 4      | 2      | 2      | 0      | 0      | 0      | 0      | 0      | 0      | 0      | 1      | 0      |
| K18209 fumarate reductase (CoM/CoB) subunit A [EC:1.3.4.1]                                                                         | 34     | 34     | 26     | 39     | 3      | 9      | 5      | 9      | 63     | 54     | 39     | 60     |
| K18210 fumarate reductase (CoM/CoB) subunit B [EC:1.3.4.1]                                                                         | 0      | 3      | 2      | 0      | 3      | 2      | 3      | 0      | 7      | 9      | 3      | 23     |
| K18556 NADH-dependent fumarate reductase subunit A [EC:1.3.1.16]                                                                   | 0      | 0      | 0      | 0      | 0      | 0      | 0      | 1      | 0      | 0      | 0      | 0      |
| K18559 NADH-dependent fumarate reductase subunit D                                                                                 | 0      | 0      | 0      | 0      | 0      | 0      | 0      | 2      | 0      | 0      | 0      | 0      |
| ko00680 Methane metabolism                                                                                                         | 103508 | 103110 | 102439 | 103040 | 99764  | 102035 | 100002 | 99858  | 104726 | 104681 | 103420 | 104820 |
| K00058 D-3-phosphoglycerate dehydrogenase / 2-oxoglutarate reductase [EC:1.1.1.95 1.1.1.399]                                       | 7254   | 6707   | 6997   | 6996   | 5036   | 5169   | 4978   | 4913   | 7449   | 7651   | 7393   | 7411   |
| K00125 formate dehydrogenase (coenzyme F420)                                                                                       |        |        |        |        |        |        |        |        |        |        |        |        |

|                                                                                                             |        |        |        |        |        |        |        |        |       |       |       |       |
|-------------------------------------------------------------------------------------------------------------|--------|--------|--------|--------|--------|--------|--------|--------|-------|-------|-------|-------|
| K00582 tetrahydromethanopterin S-methyltransferase subunit F [EC:2.1.1.86]                                  | 0      | 0      | 1      | 0      | 0      | 0      | 0      | 1      | 0     | 0     | 0     | 1     |
| K00583 tetrahydromethanopterin S-methyltransferase subunit G [EC:2.1.1.86]                                  | 0      | 1      | 0      | 0      | 1      | 1      | 0      | 0      | 0     | 0     | 0     | 0     |
| K00584 tetrahydromethanopterin S-methyltransferase subunit H [EC:2.1.1.86]                                  | 0      | 0      | 0      | 3      | 0      | 2      | 0      | 2      | 12    | 16    | 5     | 22    |
| K00672 formylmethanofuran--tetrahydromethanopterin N-formyltransferase [EC:2.3.1.101]                       | 3      | 2      | 1      | 0      | 2      | 2      | 0      | 2      | 4     | 16    | 6     | 12    |
| K00831 phosphoserine aminotransferase [EC:2.6.1.52]                                                         | 2303   | 2293   | 2385   | 2285   | 3216   | 3259   | 3311   | 3247   | 3226  | 3008  | 3200  | 3103  |
| K01070 S-formylglutathione hydrolase [EC:3.1.2.12]                                                          | 1734   | 1674   | 1659   | 1699   | 992    | 1073   | 941    | 996    | 1185  | 1169  | 1119  | 1169  |
| K01079 phosphoserine phosphatase [EC:3.1.3.3]                                                               | 2516   | 2498   | 2413   | 2455   | 3399   | 3604   | 3451   | 3294   | 2869  | 2831  | 2918  | 2902  |
| K01499 methenyltetrahydromethanopterin cyclohydrolase [EC:3.5.4.27]                                         | 8      | 7      | 8      | 17     | 0      | 0      | 3      | 2      | 10    | 13    | 5     | 12    |
| K02203 phosphoserine / homoserine phosphotransferase [EC:3.1.3.3 2.7.1.39]                                  | 866    | 946    | 883    | 906    | 523    | 449    | 510    | 428    | 274   | 244   | 309   | 263   |
| K03388 heterodisulfide reductase subunit A2 [EC:1.8.7.3 1.8.98.4 1.8.98.5 1.8.98.6]                         | 104    | 119    | 124    | 150    | 53     | 38     | 39     | 35     | 244   | 265   | 193   | 247   |
| K03389 heterodisulfide reductase subunit B2 [EC:1.8.7.3 1.8.98.4 1.8.98.5 1.8.98.6]                         | 57     | 49     | 38     | 61     | 44     | 29     | 29     | 38     | 108   | 100   | 104   | 107   |
| K03390 heterodisulfide reductase subunit C2 [EC:1.8.7.3 1.8.98.4 1.8.98.5 1.8.98.6]                         | 34     | 19     | 21     | 31     | 18     | 21     | 17     | 21     | 56    | 70    | 61    | 61    |
| K03421 methyl-coenzyme M reductase subunit C                                                                | 0      | 0      | 0      | 0      | 2      | 0      | 0      | 2      | 2     | 4     | 8     | 6     |
| K03422 methyl-coenzyme M reductase subunit D                                                                | 0      | 0      | 0      | 0      | 0      | 0      | 0      | 2      | 0     | 8     | 0     | 3     |
| K03532 trimethylamine-N-oxide reductase (cytochrome c), cytochrome c-type subunit TorC                      | 14     | 26     | 26     | 31     | 38     | 46     | 30     | 35     | 103   | 82    | 101   | 84    |
| K03533 TorA specific chaperone                                                                              | 4      | 9      | 2      | 3      | 8      | 6      | 5      | 10     | 47    | 36    | 51    | 28    |
| K04480 methanol--5-hydroxybenzimidazolycobamide Co-methyltransferase [EC:2.1.1.90]                          | 10     | 7      | 25     | 19     | 24     | 32     | 18     | 14     | 47    | 50    | 46    | 73    |
| K05884 L-2-hydroxycarboxylate dehydrogenase (NAD+) [EC:1.1.1.337]                                           | 36     | 47     | 30     | 28     | 6      | 2      | 2      | 1      | 87    | 90    | 88    | 106   |
| K05979 2-phosphosulfolactate phosphatase [EC:3.1.3.71]                                                      | 13     | 6      | 12     | 21     | 1      | 5      | 1      | 2      | 15    | 27    | 24    | 26    |
| K06034 sulfopyruvate decarboxylase subunit alpha [EC:4.1.1.79]                                              | 0      | 0      | 0      | 0      | 0      | 0      | 2      | 0      | 4     | 2     | 5     | 9     |
| K06914 tyramine--L-glutamate ligase [EC:6.3.4.24]                                                           | 0      | 0      | 0      | 0      | 0      | 1      | 0      | 0      | 2     | 9     | 3     | 7     |
| K07072 (4-[4-(2-(gamma-L-glutamylamino)ethyl]phenoxymethyl)furan-2-yl)methanamine synthase [EC:2.5.1.131]   | 2      | 0      | 0      | 0      | 0      | 5      | 0      | 2      | 3     | 5     | 2     | 6     |
| K07144 5-(aminomethyl)-3-furanmethanol phosphate kinase [EC:2.7.4.31]                                       | 0      | 0      | 0      | 0      | 2      | 0      | 0      | 0      | 4     | 2     | 3     | 4     |
| K07811 trimethylamine-N-oxide reductase (cytochrome c) [EC:1.7.2.3]                                         | 9      | 11     | 15     | 9      | 38     | 48     | 19     | 49     | 121   | 155   | 166   | 150   |
| K07812 trimethylamine-N-oxide reductase (cytochrome c) [EC:1.7.2.3]                                         | 251    | 262    | 291    | 207    | 443    | 446    | 453    | 484    | 524   | 470   | 464   | 507   |
| K07821 trimethylamine-N-oxide reductase (cytochrome c), cytochrome c-type subunit TorY                      | 2      | 8      | 2      | 3      | 12     | 14     | 17     | 12     | 52    | 43    | 37    | 42    |
| K08097 phosphosulfolactate synthase [EC:4.4.1.19]                                                           | 0      | 0      | 0      | 0      | 0      | 0      | 0      | 0      | 2     | 6     | 2     | 4     |
| K08264 heterodisulfide reductase subunit D [EC:1.8.98.1]                                                    | 3      | 2      | 0      | 3      | 2      | 0      | 3      | 0      | 4     | 9     | 1     | 8     |
| K08685 quinoxinohemoprotein amine dehydrogenase [EC:1.4.9.1]                                                | 1      | 0      | 0      | 2      | 0      | 0      | 0      | 0      | 0     | 0     | 0     | 0     |
| K09733 (5-formylfuran-3-yl)methyl phosphate synthase [EC:4.2.3.153]                                         | 2      | 3      | 0      | 0      | 0      | 0      | 2      | 0      | 0     | 9     | 3     | 4     |
| K01978 methanogen homosioctrate dehydrogenase [EC:1.1.1.87 1.1.1.-]                                         | 0      | 0      | 0      | 0      | 2      | 4      | 0      | 0      | 0     | 9     | 8     | 6     |
| K11212 LPPG-FO 2-phospho-L-lactate transferase [EC:2.7.8.28]                                                | 0      | 1      | 5      | 0      | 2      | 4      | 2      | 0      | 8     | 4     | 4     | 1     |
| K11260 4Fe-4S ferredoxin                                                                                    | 0      | 0      | 1      | 0      | 0      | 0      | 2      | 0      | 0     | 1     | 1     | 1     |
| K11261 formylmethanofuran dehydrogenase subunit E [EC:1.2.7.12]                                             | 127    | 123    | 125    | 149    | 54     | 45     | 47     | 52     | 211   | 259   | 234   | 247   |
| K11780 7,8-didemethyl-8-hydroxy-5-deazariboflavin synthase [EC:4.1.1.32]                                    | 0      | 0      | 2      | 0      | 3      | 0      | 4      | 2      | 4     | 6     | 4     | 3     |
| K11781 5-amino-6-(D-ribitylamino)uracil--L-tyrosine 4-hydroxyphenyl transferase [EC:2.5.1.147]              | 3      | 3      | 0      | 0      | 7      | 0      | 0      | 0      | 5     | 13    | 3     | 8     |
| K12234 coenzyme F420-Q-L-glutamate ligase / coenzyme F420-L-gamma-L-glutamate ligase [EC:6.3.2.31 6.3.2.34] | 0      | 1      | 0      | 0      | 3      | 0      | 3      | 0      | 1     | 2     | 1     | 9     |
| K13039 sulfopyruvate decarboxylase subunit beta [EC:4.1.1.79]                                               | 0      | 0      | 0      | 1      | 0      | 0      | 0      | 0      | 2     | 9     | 3     | 1     |
| K13942 5,10-methenyltetrahydromethanopterin hydrogenase [EC:1.12.98.2]                                      | 2      | 2      | 0      | 0      | 3      | 0      | 0      | 2      | 0     | 6     | 3     | 11    |
| K14080 [methyl-Co(III) methanol-specific corrinoid protein]:coenzyme M methyltransferase [EC:2.1.1.246]     | 8      | 20     | 11     | 9      | 11     | 10     | 8      | 4      | 16    | 24    | 21    | 31    |
| K14081 methanol corrinoid protein                                                                           | 0      | 0      | 1      | 0      | 0      | 2      | 2      | 5      | 4     | 9     | 3     | 9     |
| K14083 trimethylamine--corrinoid protein Co-methyltransferase [EC:2.1.1.250]                                | 822    | 808    | 820    | 875    | 723    | 693    | 718    | 659    | 1915  | 2087  | 1829  | 2205  |
| K14084 trimethylamine corrinoid protein                                                                     | 2      | 2      | 1      | 6      | 0      | 0      | 2      | 0      | 1     | 2     | 2     | 2     |
| K14126 F420-non-reducing hydrogenase large subunit [EC:1.12.99.- 1.8.98.5]                                  | 3      | 6      | 0      | 3      | 3      | 4      | 5      | 4      | 4     | 2     | 0     | 28    |
| K14127 F420-non-reducing hydrogenase iron-sulfur subunit [EC:1.12.99.- 1.8.98.5 1.8.98.6]                   | 0      | 0      | 0      | 0      | 0      | 1      | 0      | 0      | 6     | 4     | 0     | 4     |
| K14128 F420-non-reducing hydrogenase small subunit [EC:1.12.99.- 1.8.98.5]                                  | 0      | 0      | 1      | 0      | 0      | 0      | 2      | 1      | 2     | 8     | 3     | 20    |
| K14941 2-phospho-L-lactate guanylyltransferase [EC:2.7.7.68]                                                | 2      | 0      | 1      | 1      | 0      | 0      | 0      | 0      | 2     | 1     | 3     | 7     |
| K16176 methylamine--corrinoid protein Co-methyltransferase [EC:2.1.1.248]                                   | 10     | 12     | 12     | 8      | 3      | 5      | 2      | 2      | 5     | 4     | 9     | 4     |
| K16178 dimethylamine--corrinoid protein Co-methyltransferase [EC:2.1.1.249]                                 | 0      | 0      | 0      | 0      | 0      | 0      | 0      | 0      | 0     | 0     | 0     | 1     |
| K16179 dimethylamine corrinoid protein                                                                      | 0      | 0      | 0      | 1      | 0      | 0      | 1      | 0      | 0     | 0     | 0     | 1     |
| K16792 methanogen homoacitase large subunit [EC:4.2.1.114]                                                  | 1      | 0      | 4      | 4      | 1      | 3      | 3      | 0      | 4     | 7     | 9     | 12    |
| K16793 methanogen homoacitase small subunit [EC:4.2.1.114]                                                  | 1      | 0      | 0      | 0      | 0      | 0      | 1      | 0      | 1     | 2     | 1     | 5     |
| K18933 tyrosine decarboxylase / aspartate 1-decarboxylase [EC:4.1.1.25 4.1.1.11]                            | 0      | 0      | 0      | 3      | 2      | 1      | 2      | 2      | 3     | 0     | 8     | 5     |
| K17993 (5-formylfuran-3-yl)methyl phosphate transaminase [EC:2.6.1.108]                                     | 0      | 0      | 1      | 0      | 0      | 1      | 0      | 0      | 0     | 0     | 0     | 0     |
| K22081 methylamine--glutamate N-methyltransferase subunit A [EC:2.1.1.21]                                   | 0      | 0      | 0      | 0      | 0      | 0      | 0      | 2      | 0     | 0     | 0     | 0     |
| K22083 methylamine--glutamate N-methyltransferase subunit C [EC:2.1.1.21]                                   | 1      | 0      | 0      | 0      | 0      | 0      | 0      | 3      | 0     | 0     | 0     | 0     |
| K22084 methylglutamate dehydrogenase subunit A [EC:1.5.99.5]                                                | 0      | 0      | 0      | 1      | 0      | 1      | 0      | 0      | 0     | 1     | 0     | 0     |
| K22305 phosphoserine phosphatase [EC:3.1.3.3]                                                               | 4      | 2      | 3      | 3      | 3      | 1      | 2      | 3      | 6     | 7     | 10    | 11    |
| K22480 heterodisulfide reductase subunit A1 [EC:1.8.7.3]                                                    | 8      | 3      | 3      | 1      | 0      | 0      | 2      | 0      | 13    | 15    | 3     | 15    |
| K22483 heterodisulfide reductase subunit B1 [EC:1.8.7.3]                                                    | 2      | 0      | 0      | 1      | 0      | 1      | 0      | 2      | 6     | 7     | 3     | 10    |
| K22482 heterodisulfide reductase subunit C1 [EC:1.8.7.3]                                                    | 0      | 1      | 0      | 1      | 0      | 1      | 0      | 0      | 3     | 4     | 0     | 1     |
| K22516 formate dehydrogenase (coenzyme F420) alpha subunit [EC:1.17.98.3 1.8.98.6]                          | 36     | 26     | 20     | 31     | 14     | 8      | 19     | 9      | 22    | 35    | 29    | 26    |
| ko00910 Nitrogen metabolism                                                                                 | 120034 | 119552 | 117160 | 118852 | 102402 | 101623 | 100410 | 101796 | 98543 | 97125 | 97001 | 97654 |
| K00260 glutamate dehydrogenase [EC:1.4.1.2]                                                                 | 59     | 72     | 65     | 44     | 29     | 27     | 25     | 23     | 92    | 109   | 114   | 93    |
| K00261 glutamate dehydrogenase (NAD(P)+) [EC:1.4.1.3]                                                       | 584    | 540    | 564    | 646    | 147    | 173    | 164    | 144    | 1125  | 1169  | 1191  | 1171  |
| K00262 glutamate dehydrogenase (NADP+) [EC:1.4.1.4]                                                         | 4671   | 4827   | 5022   | 4918   | 7000   | 7211   | 7056   | 7039   | 6549  | 6261  | 6492  | 6096  |
| K00264 glutamate synthase (NADH) [EC:1.4.1.14]                                                              | 8      | 14     | 19     | 11     | 11     | 10     | 19     | 9      | 22    | 11    | 21    | 14    |
| K00265 glutamate synthase (NADPH) large chain [EC:1.4.1.13]                                                 | 14239  | 14566  | 14524  | 14318  | 15161  | 14791  | 14306  | 14093  | 14526 | 14253 | 14248 | 14084 |
| K00266 glutamate synthase (NADPH) small chain [EC:1.4.1.13]                                                 | 7387   | 7375   | 7496   | 7262   | 9781   | 9848   | 10089  | 9830   | 9306  | 9188  | 9350  | 9228  |
| K00360 assimilatory nitrate reductase electron transfer subunit [EC:1.7.99.-]                               | 3      | 0      | 0      | 0      | 0      | 1      | 0      | 0      | 0     | 0     | 0     | 0     |
| K00362 nitrite reductase (NADH) large subunit [EC:1.7.1.15]                                                 | 7321   | 7187   | 6973   | 7380   | 4370   | 4329   | 4308   | 4460   | 6239  | 6149  | 6048  | 6145  |
| K00363 nitrite reductase (NADH) small subunit [EC:1.7.1.15]                                                 | 730    | 770    | 719    | 766    | 457    | 492    | 452    | 427    | 517   | 526   | 448   | 476   |
| K00366 ferredoxin-nitrite reductase [EC:1.7.7.1]                                                            | 30     | 42     | 26     | 40     | 12     | 3      | 11     | 5      | 19    | 26    | 24    | 29    |
| K00368 nitrite reductase (NO-forming) [EC:1.7.2.1]                                                          | 0      | 0      | 0      | 2      | 1      | 2      | 1      | 2      | 4     | 16    | 3     | 5     |
| K00370 nitrate reductase / nitrite oxidoreductase, alpha subunit [EC:1.7.5.1 1.7.99.-]                      | 9684   | 9631   | 9278   | 9660   | 5346   | 5224   | 4896   | 5196   | 7670  | 7529  | 7284  | 7779  |
| K00371 nitrate reductase / nitrite oxidoreductase, beta subunit [EC:1.7.5.1 1.7.99.-]                       | 2332   | 2280   | 2264   | 2393   | 1238   | 1296   | 1185   | 1290   | 2727  | 2691  | 2562  | 2621  |
| K00372 assimilatory nitrate reductase catalytic subunit [EC:1.7.99.-]                                       | 5354   | 5390   | 5194   | 5361   | 3092   | 3005   | 2854   | 2930   | 3085  | 3080  | 2888  | 3275  |
| K00374 nitrate reductase gamma subunit [EC:1.7.5.1 1.7.99.-]                                                | 1527   | 1484   | 1539   | 1529   | 920    | 870    | 839    | 857    | 1255  | 1177  | 1231  | 1213  |
| K00376 nitrous-oxide reductase [EC:1.7.2.4]                                                                 | 1875   | 1864   | 1726   | 1846   | 980    | 1035   | 970    | 1056   | 578   | 579   | 588   | 540   |
| K00459 nitronate monooxygenase [EC:1.13.12.16]                                                              | 5347   | 5300   | 5010   | 5282   | 2775   | 2694   | 2695   | 2877   | 2232  | 2341  | 2508  |       |
| K00531 nitrogenase delta subunit [EC:1.18.6.1]                                                              | 3      | 0      | 2      | 1      | 1      | 1      | 0      | 4      | 2     | 5     | 0     | 2     |
| K00926 carbamate kinase [EC:2.7.2.2]                                                                        | 1632   | 1635   | 1708   | 1774   | 978    | 970    | 941    | 925    | 1466  | 1519  | 1470  | 1404  |
| K01501 nitrilase [EC:3.5.5.1]                                                                               | 21     | 22     | 22     | 21     | 17     | 12     | 5      | 10     | 39    | 45    | 44    | 36    |
| K01673 carbonic anhydrase [EC:4.2.1.1]                                                                      | 4600   | 4718   | 4518   | 4496   | 3490   | 3383   | 3441   | 3485   | 3333  | 3341  | 3278  | 3471  |
| K01674 carbonic anhydrase [EC:4.2.1.1]                                                                      | 25     | 27     | 33     | 33     | 14     | 5      | 6      | 10     | 31    | 50    | 41    | 21    |
| K01725 cyanate lyase [EC:4.2.1.104]                                                                         | 420    | 419    | 364    | 384    | 208    | 246    | 210    | 255    | 110   | 111   | 107   | 136   |
| K01948 carbamoyl-phosphate synthase (ammonia) [EC:6.3.4.16]                                                 | 1      | 0      | 0      | 0      | 0      | 1      | 0      | 0      | 0     | 0     | 0     | 0     |
| K02305 nitric oxide reductase subunit C                                                                     | 682    | 676    | 629    | 675    | 332    | 371    | 336    | 389    | 241   | 209   | 215   | 189   |
| K02567 periplasmic nitrate reductase NapA [EC:1.7.99.-]                                                     | 3951   | 4109   | 3678   | 3776   | 2245   | 2189   | 2197   | 2421   | 1612  | 1601  | 1529  | 1539  |
| K02568 cytochrome c-type protein NapB                                                                       | 659    | 618    | 619    | 583    | 323    | 356    | 339    | 319    | 220   | 219   | 210   | 214   |
| K02575 MFS transporter, NNP family, nitrate/nitrite transporter                                             | 5611   | 5652   | 5390   | 5528   | 2960   | 3034   | 2762   | 2960   | 3469  | 3354  | 3279  | 3647  |
| K02586 nitrogenase molybdenum-iron protein alpha chain [EC:1.18.6.1]                                        | 336    | 316    | 283    | 348    | 347    | 427    | 416    | 424    | 78    | 100   | 101   | 95    |
| K02588 nitrogenase iron protein NifH                                                                        | 289    | 262    | 266    | 309    | 316    | 344    | 334    | 326    | 137   | 183   | 169   | 163   |
| K02591 nitrogenase molybdenum-iron protein beta chain [EC:1.18.6.1]                                         | 315    | 315    | 305    | 292    | 471    | 456    | 447    | 438    | 18    | 42    | 27    | 41    |
| K03285 nitrite reductase (cytochrome c-552) [EC:1.7.2.2]                                                    | 1591   | 1725   | 1843   | 1715   | 5713   | 5810   | 5969   | 5551   | 4412  | 4137  | 4603  | 4216  |
| K04561 nitric oxide reductase subunit B [EC:1.7.2.5]                                                        | 2180   | 2103   | 1969   | 2058   | 1250   | 1118   | 1042   | 1223   | 724   | 676   | 616   | 701   |
| K05601 hydroxylamine reductase [EC:1.7.99.1]                                                                | 2761   | 2650   | 2685   | 2897   | 4045   | 4002   | 4128   | 3953   | 4184  | 4047  | 4092  | 4162  |
| K15371 glutamate dehydrogenase [EC:1.4.1.2]                                                                 | 7394   | 7227   | 6792   | 7016   | 3804   | 3820   | 3548   | 3904   | 2316  | 2180  | 2149  | 2180  |
| K15576 nitrate/nitrite transport system substrate-binding protein                                           | 777    | 655    | 646    | 707    | 419    | 412    | 419    | 450    | 1017  | 968   | 973   | 1050  |
| K15577 nitrate/nitrite transport system permease protein                                                    | 384    | 438    | 418    | 415    | 287    | 277    | 321    | 337    | 510   | 5     |       |       |

|                                                                                                                                                          |        |        |        |        |        |        |        |        |        |        |        |        |
|----------------------------------------------------------------------------------------------------------------------------------------------------------|--------|--------|--------|--------|--------|--------|--------|--------|--------|--------|--------|--------|
| K01738 cysteine synthase [EC:2.5.1.47]                                                                                                                   | 5828   | 5923   | 5827   | 5924   | 6532   | 6628   | 6576   | 6497   | 6452   | 6559   | 6224   | 6254   |
| K01739 cystathionine gamma-synthase [EC:2.5.1.48]                                                                                                        | 774    | 733    | 744    | 871    | 557    | 639    | 570    | 495    | 1056   | 1074   | 1219   | 1158   |
| K02045 sulfate/thiosulfate transport system ATP-binding protein [EC:7.3.2.3]                                                                             | 2029   | 1857   | 1833   | 1972   | 1270   | 1194   | 1245   | 1187   | 1482   | 1409   | 1431   | 1375   |
| K02046 sulfate/thiosulfate transport system permease protein                                                                                             | 1860   | 1919   | 1712   | 1923   | 1118   | 1130   | 1126   | 1156   | 1145   | 1123   | 1214   | 1115   |
| K02047 sulfate/thiosulfate transport system permease protein                                                                                             | 1419   | 1475   | 1404   | 1437   | 902    | 884    | 909    | 929    | 1071   | 1095   | 1007   | 1031   |
| K02048 sulfate/thiosulfate transport system substrate-binding protein                                                                                    | 1531   | 1579   | 1521   | 1574   | 1018   | 978    | 870    | 1008   | 1170   | 1180   | 1148   | 1151   |
| K02439 thiosulfate sulfurtransferase [EC:2.8.1.1]                                                                                                        | 727    | 741    | 741    | 780    | 497    | 496    | 417    | 473    | 421    | 449    | 517    | 507    |
| K03119 taurine dioxygenase [EC:1.14.11.17]                                                                                                               | 2862   | 2871   | 2720   | 2625   | 1552   | 1438   | 1320   | 1472   | 1485   | 1438   | 1385   | 1494   |
| K04091 alkane:sulfonate monooxygenase [EC:1.14.14.5]                                                                                                     | 6864   | 6964   | 6398   | 6640   | 3271   | 3206   | 2913   | 3432   | 4432   | 4178   | 4191   | 4399   |
| K05907 adenyl-sulfate reductase [glutathione] [EC:1.8.4.9]                                                                                               | 0      | 1      | 0      | 0      | 0      | 0      | 0      | 0      | 0      | 0      | 0      | 0      |
| K06881 bifunctional oligoribonuclease and PAP phosphatase Nma [EC:3.1.3.7 3.1.13.3]                                                                      | 1176   | 1280   | 1336   | 1269   | 2344   | 2524   | 2387   | 2379   | 2009   | 2022   | 2079   | 2008   |
| K07306 anaerobic dimethyl sulfoxide reductase subunit A [EC:1.8.5.3]                                                                                     | 1341   | 1417   | 1470   | 1467   | 1024   | 1062   | 1010   | 974    | 1886   | 2099   | 1944   | 2014   |
| K07307 anaerobic dimethyl sulfoxide reductase subunit B                                                                                                  | 709    | 712    | 628    | 621    | 426    | 482    | 495    | 509    | 909    | 1046   | 959    | 1030   |
| K07308 anaerobic dimethyl sulfoxide reductase subunit C                                                                                                  | 505    | 551    | 481    | 557    | 337    | 363    | 373    | 287    | 748    | 812    | 706    | 767    |
| K08352 thiosulfate reductase / polysulfide reductase chain A [EC:1.8.5.5]                                                                                | 71     | 62     | 52     | 48     | 36     | 34     | 22     | 36     | 95     | 68     | 84     | 105    |
| K08353 thiosulfate reductase electron transport protein                                                                                                  | 3      | 0      | 0      | 1      | 0      | 2      | 0      | 0      | 0      | 0      | 0      | 0      |
| K08354 thiosulfate reductase cytochrome b subunit                                                                                                        | 4      | 2      | 5      | 1      | 7      | 22     | 8      | 14     | 40     | 53     | 34     | 33     |
| K08357 tetrathionate reductase subunit A                                                                                                                 | 14     | 22     | 8      | 20     | 4      | 17     | 5      | 14     | 14     | 32     | 27     | 45     |
| K08358 tetrathionate reductase subunit B                                                                                                                 | 4      | 0      | 4      | 3      | 5      | 0      | 0      | 0      | 10     | 12     | 1      | 4      |
| K08359 tetrathionate reductase subunit C                                                                                                                 | 0      | 0      | 1      | 1      | 2      | 2      | 2      | 2      | 1      | 6      | 3      | 2      |
| K10764 O-succinylhomoserine sulphydrylase [EC:2.5.1.-]                                                                                                   | 1782   | 1803   | 1799   | 1710   | 900    | 953    | 926    | 1075   | 592    | 547    | 536    | 528    |
| K10831 taurine transport system ATP-binding protein [EC:7.6.2.7]                                                                                         | 1730   | 1629   | 1524   | 1597   | 743    | 805    | 720    | 770    | 1103   | 950    | 966    | 1068   |
| K11180 dissimilatory sulfite reductase alpha subunit [EC:1.8.99.5]                                                                                       | 8      | 21     | 15     | 13     | 6      | 5      | 5      | 4      | 11     | 16     | 9      | 7      |
| K11181 dissimilatory sulfite reductase beta subunit [EC:1.8.99.5]                                                                                        | 16     | 5      | 19     | 6      | 4      | 3      | 6      | 7      | 4      | 35     | 9      | 15     |
| K15551 taurine transport system substrate-binding protein                                                                                                | 1978   | 1940   | 1804   | 1930   | 1142   | 1208   | 1080   | 1150   | 1166   | 1223   | 1114   | 1285   |
| K15552 taurine transport system permease protein                                                                                                         | 1927   | 1906   | 1773   | 1774   | 1065   | 1098   | 1007   | 1061   | 1207   | 1220   | 1226   | 1221   |
| K15553 sulfonate transport system substrate-binding protein                                                                                              | 9591   | 9871   | 9258   | 9576   | 4932   | 4712   | 4690   | 5068   | 5048   | 4838   | 4846   | 5025   |
| K15554 sulfonate transport system permease protein                                                                                                       | 4942   | 4799   | 4470   | 4804   | 2505   | 2319   | 2292   | 2630   | 2186   | 2104   | 1983   | 2178   |
| K15555 sulfonate transport system ATP-binding protein [EC:3.6.3.-]                                                                                       | 4238   | 4267   | 3970   | 4307   | 2165   | 2222   | 1919   | 2348   | 1861   | 1976   | 1874   | 1853   |
| K16937 thiosulfate dehydrogenase [quinone] large subunit [EC:1.8.5.2]                                                                                    | 5      | 4      | 7      | 6      | 0      | 0      | 2      | 0      | 1      | 2      | 0      | 1      |
| K16950 anaerobic sulfite reductase subunit A                                                                                                             | 480    | 399    | 490    | 510    | 100    | 108    | 101    | 129    | 363    | 445    | 427    | 427    |
| K16951 anaerobic sulfite reductase subunit B                                                                                                             | 376    | 385    | 455    | 411    | 88     | 93     | 103    | 76     | 309    | 371    | 326    | 332    |
| K17069 O-acetylhomoserine/O-acetylserine sulphydrylase [EC:2.5.1.49 2.5.1.47]                                                                            | 0      | 2      | 0      | 0      | 0      | 0      | 0      | 1      | 0      | 0      | 0      | 0      |
| K17217 cystathionine gamma-lyase / homocysteine desulhydrase [EC:4.4.1.1 4.4.1.2]                                                                        | 0      | 0      | 1      | 0      | 0      | 0      | 0      | 0      | 0      | 0      | 1      | 1      |
| K17218 sulfide:quinone oxidoreductase [EC:1.8.5.4]                                                                                                       | 3466   | 3442   | 3097   | 3222   | 1692   | 1618   | 1590   | 1787   | 1106   | 1004   | 960    | 1028   |
| K17222 L-cysteine S-thiosulfotransferase [EC:2.8.5.2]                                                                                                    | 0      | 0      | 0      | 0      | 0      | 0      | 0      | 0      | 2      | 0      | 0      | 0      |
| K17226 sulfur-oxidizing protein SoxY                                                                                                                     | 2      | 0      | 0      | 0      | 0      | 0      | 0      | 0      | 0      | 0      | 0      | 0      |
| K17228 dimethylsulfone monooxygenase [EC:1.14.14.35]                                                                                                     | 536    | 566    | 474    | 540    | 268    | 293    | 259    | 332    | 186    | 165    | 169    | 162    |
| K20034 3-(methylthio)propionyl-CoA ligase [EC:6.2.1.44]                                                                                                  | 597    | 593    | 554    | 653    | 170    | 156    | 156    | 151    | 1277   | 1254   | 1263   | 1289   |
| K20035 3-(methylthio)propanoyl-CoA dehydrogenase [EC:1.3.8.-]                                                                                            | 2      | 0      | 1      | 1      | 0      | 0      | 0      | 0      | 1      | 1      | 1      | 0      |
| K21307 sulfite dehydrogenase (quinone) subunit SoeA [EC:1.8.5.6]                                                                                         | 10     | 1      | 2      | 9      | 2      | 1      | 3      | 3      | 4      | 11     | 13     | 11     |
| K21308 sulfite dehydrogenase (quinone) subunit SoeB                                                                                                      | 1      | 0      | 0      | 0      | 0      | 0      | 0      | 0      | 0      | 0      | 0      | 0      |
| K23163 sulfite/thiosulfate transport system substrate-binding protein                                                                                    | 2296   | 2418   | 2200   | 2339   | 1391   | 1371   | 1387   | 1477   | 1354   | 1436   | 1406   | 1468   |
| K23304 serine O-acetyltransferase [EC:2.3.1.30]                                                                                                          | 0      | 0      | 0      | 0      | 0      | 1      | 3      | 0      | 0      | 0      | 0      | 1      |
| Lipid metabolism                                                                                                                                         | 309133 | 311310 | 306979 | 308645 | 306871 | 305504 | 305084 | 306841 | 292771 | 289500 | 288010 | 289817 |
| ko00061 Fatty acid synthesis                                                                                                                             | 66452  | 66872  | 66378  | 66508  | 70556  | 69105  | 70239  | 70803  | 62022  | 61518  | 61559  | 61627  |
| K00069 3-oxoacyl-[acyl-carrier protein] reductase [EC:1.1.1.100]                                                                                         | 13605  | 13158  | 13121  | 13004  | 9680   | 9267   | 9323   | 9691   | 8537   | 8520   | 8456   | 8451   |
| K00208 enoyl-[acyl-carrier protein] reductase I [EC:1.3.1.9 1.3.1.10]                                                                                    | 1438   | 1495   | 1521   | 1533   | 2368   | 2390   | 2378   | 2253   | 2194   | 2014   | 2126   | 2133   |
| K00645 [acyl-carrier-protein] 5-malonyltransferase [EC:2.3.1.39]                                                                                         | 3126   | 3021   | 3156   | 3243   | 2939   | 2989   | 2957   | 2925   | 3173   | 3232   | 3216   | 3225   |
| K00647 3-oxoacyl-[acyl-carrier-protein] synthase I [EC:2.3.1.41]                                                                                         | 4745   | 4733   | 4459   | 4601   | 3014   | 2927   | 2781   | 3133   | 2225   | 2219   | 2169   | 2295   |
| K00648 3-oxoacyl-[acyl-carrier-protein] synthase III [EC:2.3.1.180]                                                                                      | 3715   | 4111   | 4025   | 3925   | 5668   | 5615   | 5633   | 5569   | 4836   | 4801   | 4796   | 4751   |
| K00667 fatty acid synthase subunit alpha, fungi type [EC:2.3.1.186]                                                                                      | 0      | 2      | 0      | 0      | 0      | 0      | 0      | 0      | 0      | 0      | 0      | 0      |
| K01071 medium-chain acyl-[acyl-carrier-protein] hydrolase [EC:3.1.2.21]                                                                                  | 65     | 58     | 52     | 57     | 24     | 20     | 30     | 21     | 53     | 90     | 50     | 57     |
| K01716 3-hydroxyacyl-[acyl-carrier protein] dehydratase / trans-2-decenoyl-[acyl-carrier protein] isomerase [EC:4.2.1.59 5.3.3.14]                       | 750    | 917    | 808    | 819    | 537    | 511    | 492    | 553    | 599    | 602    | 634    | 596    |
| K01897 long-chain acyl-CoA synthetase [EC:6.2.1.3]                                                                                                       | 8970   | 9406   | 9278   | 9093   | 17228  | 16696  | 17565  | 17395  | 13676  | 13087  | 13358  | 13238  |
| K02078 acyl carrier protein                                                                                                                              | 1579   | 1533   | 1518   | 1673   | 1524   | 1501   | 1511   | 1628   | 1542   | 1495   | 1572   | 1570   |
| K02371 enoyl-[acyl-carrier protein] reductase II [EC:1.3.1.9]                                                                                            | 1555   | 1614   | 1626   | 1652   | 2122   | 2055   | 2065   | 2065   | 2538   | 2576   | 2560   | 2511   |
| K02372 3-hydroxyacyl-[acyl-carrier-protein] dehydratase [EC:4.2.1.59]                                                                                    | 1529   | 1441   | 1523   | 1471   | 819    | 796    | 844    | 837    | 1074   | 1132   | 1061   | 1174   |
| K03921 acyl-[acyl-carrier-protein] desaturase [EC:1.14.19.2 1.14.19.11 1.14.19.26]                                                                       | 0      | 0      | 0      | 0      | 0      | 0      | 0      | 0      | 0      | 0      | 2      | 0      |
| K04558 3-oxoacyl-[acyl-carrier-protein] synthase II [EC:3.1.1.79]                                                                                        | 707    | 699    | 702    | 7052   | 6574   | 6571   | 6635   | 6363   | 6355   | 6448   | 6463   | 6317   |
| K0780 enoyl-[acyl-carrier protein] reductase III [EC:1.3.1.104]                                                                                          | 2      | 2      | 1      | 1      | 0      | 0      | 1      | 0      | 3      | 1      | 3      | 1      |
| K11533 fatty acid synthase, bacteria type [EC:2.3.1.-]                                                                                                   | 11     | 8      | 7      | 15     | 8      | 10     | 12     | 14     | 39     | 49     | 53     | 101    |
| K13370 17beta-estradiol 17-dehydrogenase / 3alpha(17beta)-hydroxysteroid dehydrogenase (NAD+) / 3-oxoacyl-[acyl-carrier protein] reductase alpha subunit | 1      | 1      | 0      | 0      | 0      | 1      | 0      | 0      | 0      | 0      | 0      | 0      |
| K16363 UDP-3-O-[3-hydroxymyristoyl] N-acetylglucosamine deacetylase / 3-hydroxyacyl-[acyl-carrier-protein] dehydratase [EC:3.5.1.108 4.2.1.59]           | 974    | 927    | 938    | 919    | 2968   | 3011   | 2989   | 2986   | 2053   | 1991   | 2036   | 1939   |
| K18473 acetoacetyl-[acyl-carrier protein] synthase [EC:3.1.180]                                                                                          | 3589   | 3386   | 3346   | 3566   | 2120   | 1860   | 1943   | 2037   | 1148   | 1092   | 1056   | 1157   |
| K18474 trans-2-decenoyl-[acyl-carrier protein] isomerase [EC:5.3.3.14]                                                                                   | 3      | 7      | 10     | 5      | 0      | 0      | 2      | 0      | 0      | 0      | 2      | 3      |
| K18660 malonyl-CoA/methylmalonyl-CoA synthetase [EC:6.2.1.-]                                                                                             | 0      | 0      | 0      | 0      | 0      | 1      | 0      | 0      | 0      | 0      | 0      | 0      |
| K22540 3-hydroxyacyl-thioester dehydratase, animal type [EC:4.2.1.-]                                                                                     | 0      | 0      | 1      | 1      | 0      | 0      | 0      | 0      | 0      | 0      | 0      | 0      |
| ko00062 Fatty acid elongation                                                                                                                            | 5      | 0      | 4      | 1      | 2      | 0      | 0      | 3      | 1      | 0      | 0      | 0      |
| K01068 acyl-coenzyme A thioesterase 1/2/4 [EC:3.1.2.2]                                                                                                   | 0      | 0      | 0      | 0      | 2      | 0      | 0      | 0      | 0      | 0      | 0      | 0      |
| K01074 palmitoyl-protein thioesterase [EC:3.1.2.22]                                                                                                      | 0      | 0      | 1      | 0      | 0      | 0      | 0      | 0      | 0      | 0      | 0      | 0      |
| K07508 acetyl-CoA acyltransferase 2 [EC:2.3.1.16]                                                                                                        | 1      | 0      | 1      | 0      | 0      | 0      | 0      | 2      | 0      | 0      | 0      | 0      |
| ko00071 Fatty acid degradation                                                                                                                           | 83216  | 82836  | 80666  | 81489  | 59791  | 58151  | 57555  | 59765  | 53800  | 53036  | 52240  | 53654  |
| K00249 acyl-CoA dehydrogenase [EC:1.3.8.7]                                                                                                               | 12040  | 11683  | 11576  | 11551  | 6589   | 6315   | 6025   | 6736   | 3910   | 3629   | 3652   | 3657   |
| K00252 glutaryl-CoA dehydrogenase [EC:1.3.8.6]                                                                                                           | 1884   | 1899   | 1710   | 1822   | 1064   | 957    | 991    | 992    | 606    | 580    | 507    | 596    |
| K00496 alkane 1-monooxygenase [EC:1.14.15.3]                                                                                                             | 3112   | 2999   | 3072   | 3017   | 1802   | 1663   | 1528   | 1644   | 984    | 1003   | 897    | 988    |
| K05029 3-phenylpropanoate/trans-cinnamate dioxygenase ferredoxin reductase component [EC:1.18.1.3]                                                       | 127    | 149    | 118    | 99     | 20     | 5      | 13     | 8      | 4      | 7      | 5      | 5      |
| K00632 acetyl-CoA acyltransferase [EC:2.3.1.16]                                                                                                          | 6771   | 6698   | 6402   | 6636   | 4031   | 3892   | 3923   | 3925   | 3815   | 3724   | 3658   | 3839   |
| K01909 long-chain-fatty-acyl-[acyl-carrier-protein] ligase [EC:6.2.1.20]                                                                                 | 0      | 0      | 1      | 1      | 0      | 0      | 0      | 0      | 0      | 0      | 0      | 0      |
| K05297 rubredoxin---NAD+ reductase [EC:1.18.1.1]                                                                                                         | 2218   | 2122   | 2033   | 1965   | 1193   | 1119   | 1081   | 1201   | 704    | 613    | 622    | 710    |
| K05939 acyl-[acyl-carrier-protein]-phospholipid O-acyltransferase / long-chain-fatty-acyl-[acyl-carrier-protein] ligase [EC:2.3.1.40 6.2.1.20]           | 1432   | 1359   | 1316   | 1323   | 896    | 1075   | 946    | 966    | 1758   | 1863   | 1890   | 1888   |
| K06445 CoA dehydrogenase [EC:1.3.99.-]                                                                                                                   | 5037   | 4873   | 4680   | 4861   | 2879   | 2925   | 2805   | 2925   | 3217   | 3266   | 3076   | 3375   |
| K09478 short/branched chain acyl-CoA dehydrogenase [EC:1.3.99.12]                                                                                        | 6      | 2      | 5      | 1      | 1      | 0      | 2      | 1      | 4      | 7      | 8      | 3      |
| K09479 very long chain acyl-CoA dehydrogenase [EC:1.3.8.9]                                                                                               | 0      | 1      | 0      | 1      | 1      | 1      | 3      | 1      | 2      | 1      | 0      | 0      |
| K13239 Delta3-Delta2-enoyl-CoA isomerase [EC:5.3.3.8]                                                                                                    | 1      | 0      | 0      | 0      | 0      | 0      | 0      | 0      | 0      | 0      | 0      | 0      |
| K13767 enoyl-CoA hydratase [EC:4.2.1.17]                                                                                                                 | 0      | 1      | 0      | 0      | 0      | 0      | 0      | 0      | 0      | 1      | 0      | 0      |
| ko00072 Synthesis and degradation of ketone bodies                                                                                                       | 16578  | 16749  | 15589  | 16376  | 9086   | 8818   | 8510   | 9209   | 9181   | 9493   | 9076   | 9436   |
| ko00100 Steroid biosynthesis                                                                                                                             | 0      | 1      | 0      | 2      | 0      | 1      | 0      | 0      | 2      | 1      | 3      | 8      |
| K12298 bile salt-stimulated lipase [EC:3.1.1.3 3.1.1.13]                                                                                                 | 0      | 1      | 0      | 2      | 0      | 1      | 0      | 0      | 2      | 1      | 3      | 8      |
| ko00120 Primary bile acid biosynthesis                                                                                                                   | 2512   | 2686   | 2823   | 2640   | 6374   | 6506   | 6651   | 6256   | 5338   | 5106   | 5378   | 5153   |
| K01442 cholestyglycine hydrolase [EC:3.5.1.24]                                                                                                           | 2512   | 2685   | 2822   | 2640   | 6374   | 6506   | 6651   | 6256   | 5338   | 5105   | 5377   | 5153   |
| K01796 alpha-methylacyl-CoA racemase [EC:5.1.99.4]                                                                                                       | 0      | 1      | 1      | 0      | 0      | 0      | 0      | 0      | 0      | 1      | 1      | 0      |
| ko00121 Secondary bile acid biosynthesis                                                                                                                 | 2784   | 2957   | 3101   | 2906   | 6442   | 6575   | 6715   | 6334   | 5557   | 5342   | 5614   | 5384   |
| K00076 7-alpha-hydroxysteroid dehydrogenase [EC:1.1.1.159]                                                                                               | 5      | 0      | 3      | 3      | 3      | 4      | 8      | 15     | 30     | 40     | 36     | 36     |
| K15868 bile acid-coenzyme A ligase [EC:6.2.1.7]                                                                                                          | 15     | 7      | 2      | 5      | 5      | 5      | 7      | 12     | 24     | 21     | 32     | 23     |
| K22604 3alpha-hydroxycholanoate dehydrogenase (NAD+) [EC:1.1.1.52]                                                                                       | 2      | 0      | 3      | 3      | 1      | 1      | 0      | 0      | 0      | 0      | 1      | 0      |
| K22605 3alpha-hydroxycholanoate dehydrogenase (NADP+) [EC:1.1.1.392]                                                                                     | 0      | 0      | 1      | 0      | 0      | 0      |        |        |        |        |        |        |

|                                                                                                              |       |       |       |       |       |       |       |       |       |       |       |       |
|--------------------------------------------------------------------------------------------------------------|-------|-------|-------|-------|-------|-------|-------|-------|-------|-------|-------|-------|
| K01622 glycerol dehydrogenase small subunit [EC:4.2.1.30]                                                    | 176   | 177   | 213   | 184   | 66    | 47    | 47    | 52    | 389   | 357   | 292   | 337   |
| K07029 diacylglycerol kinase (ATP) [EC:2.7.1.107]                                                            | 59    | 62    | 43    | 72    | 15    | 28    | 24    | 17    | 43    | 102   | 66    | 76    |
| K08591 acyl phosphate:glycerol-3-phosphate acyltransferase [EC:2.3.1.275]                                    | 1652  | 1663  | 1529  | 1593  | 919   | 867   | 870   | 897   | 1300  | 1325  | 1257  | 1283  |
| K13677 1,2-diacylglycerol-3-alpha-glucose alpha-1,2-glucosyltransferase [EC:2.4.1.208]                       | 134   | 157   | 152   | 140   | 85    | 92    | 72    | 61    | 193   | 231   | 221   | 211   |
| K18097 glycerol 2-dehydrogenase (NADP+) [EC:1.1.1.156]                                                       | 0     | 0     | 0     | 1     | 2     | 0     | 0     | 0     | 1     | 1     | 1     | 0     |
| K19002 1,2-diacylglycerol-3-alpha-glucosyltransferase [EC:2.4.1.337]                                         | 226   | 222   | 285   | 229   | 304   | 382   | 336   | 307   | 453   | 525   | 465   | 507   |
| K19003 1,2-diacylglycerol-3-beta-glucosyltransferase [EC:2.4.1.336]                                          | 1     | 0     | 4     | 1     | 0     | 0     | 1     | 0     | 5     | 3     | 3     | 1     |
| K19005 lipoteichoic acid synthase [EC:2.7.8.20]                                                              | 130   | 106   | 113   | 129   | 50    | 57    | 66    | 69    | 107   | 174   | 155   | 154   |
| K22251 glycerol dehydrogenase [EC:1.1.1.6]                                                                   | 3     | 5     | 2     | 2     | 3     | 0     | 3     | 0     | 11    | 5     | 6     | 7     |
| ko00564 Glycerophospholipid metabolism                                                                       | 77188 | 77094 | 75885 | 77077 | 65895 | 66643 | 65676 | 66179 | 70002 | 69934 | 68518 | 69693 |
| K00057 glycerol-3-phosphate dehydrogenase (NAD(P)+) [EC:1.1.1.94]                                            | 3404  | 3354  | 3433  | 3401  | 3649  | 3771  | 3650  | 3735  | 3691  | 3369  | 3504  | 3480  |
| K00096 glycerol-1-phosphate dehydrogenase [NAD(P)+] [EC:1.1.1.261]                                           | 2527  | 242   | 316   | 296   | 182   | 199   | 191   | 170   | 632   | 631   | 602   | 611   |
| K00105 alpha-glycerophosphate oxidase [EC:1.1.3.21]                                                          | 87    | 88    | 106   | 112   | 24    | 37    | 32    | 52    | 95    | 126   | 98    | 116   |
| K00111 glycerol-3-phosphate dehydrogenase [EC:1.1.5.3]                                                       | 9039  | 8963  | 8559  | 9138  | 5136  | 4938  | 4829  | 4954  | 5979  | 5996  | 5981  | 6057  |
| K00113 glycerol-3-phosphate dehydrogenase subunit B [EC:1.1.5.3]                                             | 779   | 745   | 664   | 789   | 534   | 581   | 549   | 538   | 1036  | 1121  | 1045  | 1140  |
| K00113 glycerol-3-phosphate dehydrogenase subunit C                                                          | 643   | 705   | 606   | 692   | 408   | 534   | 501   | 497   | 934   | 834   | 834   | 1010  |
| K00570 phosphatidylethanolamine/phosphatidyl-N-methylethanolamine N-methyltransferase [EC:2.1.1.17 2.1.1.71] | 3     | 0     | 0     | 1     | 0     | 3     | 0     | 0     | 0     | 2     | 0     | 1     |
| K00968 choline-phosphate cytidylyltransferase [EC:2.7.7.15]                                                  | 2     | 0     | 0     | 0     | 3     | 7     | 5     | 2     | 7     | 9     | 4     | 11    |
| K00980 glycerol-3-phosphate cytidylyltransferase [EC:2.7.7.39]                                               | 128   | 112   | 121   | 117   | 122   | 135   | 154   | 134   | 69    | 72    | 65    | 66    |
| K00981 phosphatidate cytidylyltransferase [EC:2.7.7.41]                                                      | 4288  | 4498  | 4412  | 4303  | 5619  | 5594  | 5414  | 5341  | 4725  | 4684  | 4710  | 4563  |
| K00995 CDP-diacylglycerol—glycerol-3-phosphate 3-phosphatidyltransferase [EC:2.7.8.5]                        | 2497  | 2587  | 2647  | 2492  | 2480  | 2396  | 2450  | 2518  | 2057  | 2024  | 2017  | 2077  |
| K00998 CDP-diacylglycerol—serine O-phosphatidyltransferase [EC:2.7.8.8]                                      | 792   | 787   | 797   | 785   | 497   | 629   | 570   | 514   | 1092  | 1170  | 1179  | 1107  |
| K01004 phosphatidylcholine synthase [EC:2.7.8.24]                                                            | 1093  | 1075  | 1019  | 1055  | 610   | 611   | 575   | 605   | 338   | 366   | 320   | 332   |
| K01048 lysophospholipase [EC:3.1.1.5]                                                                        | 730   | 681   | 699   | 776   | 552   | 529   | 541   | 444   | 975   | 1046  | 1005  | 1073  |
| K01058 phospholipase A1/A2 [EC:3.1.1.32 3.1.1.4]                                                             | 506   | 600   | 573   | 624   | 373   | 403   | 400   | 382   | 768   | 767   | 775   | 839   |
| K01095 phosphatidylglycerophosphatase A [EC:3.1.3.27]                                                        | 1286  | 1315  | 1254  | 1325  | 1485  | 1451  | 1476  | 1513  | 1355  | 1531  | 1346  | 1275  |
| K01096 phosphatidylglycerophosphatase B [EC:3.1.3.27 3.1.3.81 3.1.3.4 3.6.1.27]                              | 476   | 475   | 467   | 485   | 269   | 341   | 291   | 302   | 786   | 832   | 708   | 714   |
| K01115 phospholipase D1/2 [EC:3.1.4.4]                                                                       | 0     | 0     | 0     | 0     | 0     | 0     | 0     | 0     | 0     | 0     | 1     | 0     |
| K01126 glycerophosphoryl diester phosphodiesterase [EC:3.1.4.46]                                             | 10729 | 10609 | 10677 | 10476 | 13418 | 13053 | 13563 | 13347 | 12072 | 11885 | 11814 | 11854 |
| K01521 CDP-diacylglycerol pyrophosphatase [EC:3.6.1.26]                                                      | 463   | 456   | 462   | 501   | 338   | 379   | 306   | 375   | 677   | 704   | 626   | 679   |
| K01613 phosphatidylserine decarboxylase [EC:4.1.1.65]                                                        | 2101  | 2214  | 2222  | 2138  | 2138  | 2303  | 2403  |       |       |       |       |       |

|                                                                                                                       |        |        |        |        |        |        |        |        |        |        |        |        |
|-----------------------------------------------------------------------------------------------------------------------|--------|--------|--------|--------|--------|--------|--------|--------|--------|--------|--------|--------|
| K01933 phosphoribosylformylglycinamide cyclo-ligase [EC:6.3.3.1]                                                      | 3845   | 3888   | 3914   | 4006   | 4236   | 4459   | 4139   | 4206   | 4268   | 4279   | 4371   | 4262   |
| K01939 adenylosuccinate synthase [EC:6.3.4.4]                                                                         | 4749   | 4755   | 4893   | 4816   | 5048   | 5100   | 4981   | 4927   | 4913   | 4993   | 4954   | 5049   |
| K01945 phosphoribosylamine--glycine ligase [EC:6.3.4.13]                                                              | 4766   | 4817   | 4698   | 4624   | 5075   | 5203   | 5160   | 5270   | 4978   | 4924   | 5054   | 4804   |
| K01951 GMP synthase [glutamine-hydrolysing] [EC:6.3.5.2]                                                              | 7368   | 7456   | 7759   | 7400   | 9383   | 9471   | 9336   | 9310   | 8978   | 8745   | 8786   | 8640   |
| K01952 phosphoribosylformylglycinamide synthase [EC:6.3.5.3]                                                          | 12215  | 12259  | 12723  | 12342  | 13001  | 13269  | 13457  | 13621  | 12170  | 11877  | 11837  | 12247  |
| K02083 allantoinase [EC:3.5.3.9]                                                                                      | 841    | 833    | 793    | 829    | 517    | 602    | 526    | 504    | 970    | 1110   | 1022   | 1052   |
| K02428 XTP/dTTP diphosphohydrolase [EC:3.6.1.66]                                                                      | 2249   | 2296   | 2426   | 2300   | 3759   | 3755   | 3788   | 3673   | 3398   | 3276   | 3362   | 3300   |
| K03651 3',5'-cyclic-AMP phosphodiesterase [EC:3.1.4.53]                                                               | 2371   | 2281   | 2089   | 2282   | 1228   | 1218   | 1255   | 1392   | 1983   | 1897   | 1829   | 1988   |
| K03783 purine-nucleoside phosphorylase [EC:2.4.2.1]                                                                   | 973    | 1038   | 1075   | 993    | 1973   | 2101   | 2051   | 1976   | 1723   | 1673   | 1671   | 1749   |
| K03784 purine-nucleoside phosphorylase [EC:2.4.2.1]                                                                   | 868    | 985    | 869    | 1002   | 591    | 631    | 509    | 517    | 965    | 1076   | 1039   | 1019   |
| K03787 5'-nucleotidase [EC:3.1.3.5]                                                                                   | 1497   | 1639   | 1662   | 1567   | 2344   | 2396   | 2515   | 2301   | 2187   | 2128   | 2139   | 2191   |
| K03815 xanthosine phosphorylase [EC:2.4.2.-]                                                                          | 3      | 0      | 3      | 0      | 3      | 12     | 9      | 16     | 34     | 65     | 66     | 42     |
| K03816 xanthine phosphoribosyltransferase [EC:2.4.2.22]                                                               | 1731   | 1816   | 1755   | 1746   | 1795   | 1838   | 1924   | 1799   | 1565   | 1552   | 1527   | 1418   |
| K04765 nucleoside triphosphate diphosphatase [EC:3.6.1.9]                                                             | 703    | 695    | 699    | 766    | 494    | 503    | 476    | 458    | 704    | 742    | 643    | 837    |
| K05851 adenylate cyclase, class 1 [EC:4.6.1.1]                                                                        | 6311   | 6262   | 5805   | 6160   | 3757   | 3673   | 3565   | 3734   | 3676   | 3624   | 3452   | 3539   |
| K05873 adenylate cyclase, class 2 [EC:4.6.1.1]                                                                        | 0      | 5      | 5      | 7      | 8      | 2      | 3      | 3      | 0      | 9      | 13     | 7      |
| K06863 5-formaminoimidazole-4-carboxamide-1-(beta)-D-ribofuranosyl 5'-monophosphate synthetase [EC:6.3.4.23]          | 0      | 0      | 2      | 1      | 0      | 2      | 0      | 0      | 7      | 9      | 6      | 15     |
| K06928 nucleoside-triphosphatase [EC:3.6.1.15]                                                                        | 1      | 0      | 0      | 0      | 12     | 18     | 15     | 20     | 3      | 0      | 3      | 9      |
| K06966 pyrimidine/purine-5'-nucleotide nucleosidase [EC:3.2.2.10 3.2.2.-]                                             | 929    | 1029   | 974    | 976    | 650    | 657    | 641    | 707    | 1261   | 1242   | 1230   | 1346   |
| K07127 5-hydroxyisourate hydrolase [EC:3.5.2.17]                                                                      | 944    | 944    | 851    | 901    | 487    | 517    | 469    | 476    | 744    | 850    | 729    | 834    |
| K07816 putative GTP pyrophosphokinase [EC:2.7.6.5]                                                                    | 1089   | 1086   | 1222   | 1117   | 315    | 332    | 293    | 286    | 1116   | 1201   | 1183   | 1185   |
| K08289 phosphoribosylglycinamide formyltransferase 2 [EC:2.1.2.2]                                                     | 2128   | 2104   | 2047   | 2107   | 2336   | 2350   | 2356   | 2228   | 2495   | 2475   | 2450   | 2507   |
| K08312 ADP-ribose diphosphatase [EC:3.6.1.-]                                                                          | 1128   | 1004   | 1100   | 1154   | 689    | 729    | 692    | 625    | 735    | 648    | 753    | 665    |
| K08693 2',3'-cyclic-nucleotide 2'-phosphodiesterase / 3'-nucleotidase / 5'-nucleotidase [EC:3.1.4.16 3.1.3.6 3.1.3.5] | 0      | 0      | 1      | 0      | 0      | 0      | 0      | 0      | 1      | 0      | 3      | 1      |
| K08723 5'-nucleotidase [EC:3.1.3.5]                                                                                   | 433    | 488    | 433    | 460    | 303    | 312    | 318    | 312    | 546    | 649    | 526    | 623    |
| K09913 purine/pyrimidine-nucleoside phosphorylase [EC:2.4.2.1 2.4.2.2]                                                | 554    | 642    | 623    | 593    | 368    | 320    | 340    | 368    | 407    | 420    | 382    | 442    |
| K10213 ribosylpyrimidine nucleosidase [EC:3.2.2.8]                                                                    | 164    | 168    | 154    | 159    | 231    | 247    | 223    | 253    | 31     | 61     | 59     | 58     |
| K10253 deoxyadenosine kinase [EC:2.7.1.76]                                                                            | 0      | 0      | 0      | 0      | 0      | 3      | 0      | 2      | 1      | 0      | 0      | 0      |
| K10807 ribonucleoside-diphosphate reductase subunit M1 [EC:1.17.1.4]                                                  | 0      | 0      | 0      | 0      | 0      | 0      | 0      | 0      | 0      | 0      | 0      | 3      |
| K11175 phosphoribosylglycinamide formyltransferase 1 [EC:2.1.2.2]                                                     | 2241   | 2257   | 2294   | 2276   | 2476   | 2529   | 2566   | 2446   | 2400   | 2427   | 2297   | 2273   |
| K11176 IMP cyclohydrolase [EC:3.5.4.10]                                                                               | 0      | 5      | 0      | 0      | 2      | 0      | 0      | 0      | 0      | 3      | 5      | 2      |
| K11177 xanthine dehydrogenase YagR molybdenum-binding subunit [EC:1.17.1.4]                                           | 3204   | 3053   | 3060   | 3008   | 1685   | 1584   | 1622   | 1687   | 901    | 845    | 966    | 942    |
| K11178 xanthine dehydrogenase YagS FAD-binding subunit [EC:1.17.1.4]                                                  | 1319   | 1325   | 1181   | 1242   | 672    | 634    | 663    | 649    | 331    | 319    | 313    | 399    |
| K11751 5'-nucleotidase / UDP-sugar diphosphatase [EC:3.1.3.5 3.6.1.45]                                                | 2851   | 2774   | 2825   | 2851   | 988    | 1083   | 967    | 938    | 3132   | 3277   | 3245   | 3338   |
| K11788 phosphoribosylamine--glycine ligase / phosphoribosylformylglycinamide cyclo-ligase [EC:6.3.4.13 6.3.3.1]       | 1      | 0      | 1      | 1      | 0      | 1      | 0      | 2      | 2      | 0      | 3      | 1      |
| K13479 xanthine dehydrogenase FAD-binding subunit [EC:1.17.1.4]                                                       | 465    | 435    | 428    | 459    | 110    | 134    | 128    | 144    | 372    | 464    | 405    | 434    |
| K13480 xanthine dehydrogenase iron-sulfur-binding subunit                                                             | 2      | 8      | 7      | 3      | 8      | 5      | 11     | 11     | 25     | 25     | 24     | 38     |
| K13481 xanthine dehydrogenase small subunit [EC:1.17.1.4]                                                             | 1804   | 1887   | 1875   | 1885   | 1019   | 1047   | 978    | 1081   | 639    | 556    | 516    | 612    |
| K13482 xanthine dehydrogenase large subunit [EC:1.17.1.4]                                                             | 3438   | 3542   | 3398   | 3534   | 1833   | 1840   | 1816   | 1983   | 1123   | 1089   | 953    | 1095   |
| K13483 xanthine dehydrogenase YagT iron-sulfur-binding subunit                                                        | 642    | 707    | 590    | 631    | 309    | 372    | 330    | 380    | 205    | 184    | 192    | 210    |
| K14048 urease subunit gamma/beta [EC:3.5.1.5]                                                                         | 13     | 23     | 15     | 16     | 4      | 5      | 3      | 1      | 33     | 34     | 24     | 49     |
| K14642 urea glypyrase [EC:3.6.1.5]                                                                                    | 0      | 0      | 0      | 0      | 0      | 0      | 0      | 0      | 0      | 0      | 2      | 0      |
| K14977 [5]-ureidoglycine aminohydrolase [EC:3.5.3.26]                                                                 | 1534   | 1319   | 1269   | 1377   | 755    | 776    | 692    | 841    | 600    | 585    | 497    | 589    |
| K15518 deoxyguanosine kinase [EC:2.7.1.113]                                                                           | 2      | 0      | 0      | 0      | 0      | 0      | 0      | 0      | 0      | 0      | 0      | 0      |
| K15519 deoxyadenosine/deoxycytidine kinase [EC:2.7.1.76 2.7.1.74]                                                     | 2      | 0      | 0      | 0      | 0      | 0      | 0      | 0      | 0      | 0      | 0      | 0      |
| K15780 bifunctional protein TIS/HprT [EC:6.3.4.19 2.4.2.8]                                                            | 0      | 0      | 1      | 0      | 0      | 0      | 0      | 0      | 0      | 0      | 2      | 1      |
| K16839 FAD-dependent urate hydroxylase [EC:1.14.13.113]                                                               | 691    | 717    | 599    | 666    | 450    | 454    | 427    | 468    | 930    | 996    | 884    | 972    |
| K16840 2-oxo-4-hydroxy-4-carboxy-5-ureidoimidazole decarboxylase [EC:4.1.1.97]                                        | 267    | 263    | 238    | 276    | 166    | 184    | 214    | 185    | 377    | 372    | 404    | 410    |
| K16841 allantoin racemase [EC:5.1.99.3]                                                                               | 414    | 428    | 422    | 481    | 278    | 302    | 333    | 264    | 630    | 586    | 564    | 625    |
| K16842 allantoinase [EC:3.5.2.5]                                                                                      | 544    | 544    | 491    | 562    | 394    | 364    | 375    | 359    | 593    | 656    | 579    | 641    |
| K16856 ureidoglycolate lyase [EC:4.3.2.3]                                                                             | 0      | 0      | 0      | 1      | 0      | 0      | 0      | 0      | 0      | 0      | 0      | 0      |
| K18151 ureidoglycolate amidohydrolase [EC:3.5.1.116]                                                                  | 7      | 2      | 5      | 5      | 0      | 1      | 1      | 0      | 3      | 2      | 2      | 0      |
| K18532 adenylate kinase [EC:2.7.4.3]                                                                                  | 0      | 0      | 0      | 0      | 2      | 0      | 0      | 0      | 2      | 4      | 0      | 10     |
| K19572 adenosine deaminase CECR1 [EC:3.5.4.4]                                                                         | 0      | 0      | 0      | 1      | 0      | 0      | 0      | 0      | 1      | 0      | 0      | 1      |
| K19710 ATP adenylyltransferase [EC:2.7.7.53]                                                                          | 6      | 5      | 3      | 3      | 0      | 4      | 0      | 1      | 4      | 13     | 4      | 9      |
| K20881 5'-nucleotidase [EC:3.1.3.5]                                                                                   | 1623   | 1681   | 1635   | 1586   | 972    | 1035   | 963    | 1047   | 1004   | 1011   | 951    | 1006   |
| K21053 adenine deaminase [EC:3.5.4.2]                                                                                 | 1663   | 1684   | 1419   | 1586   | 849    | 816    | 805    | 890    | 525    | 463    | 465    | 487    |
| K21636 ribonucleoside-triphosphate reductase (formate) [EC:1.1.98.6]                                                  | 7675   | 7450   | 7766   | 7789   | 9242   | 9496   | 9482   | 9050   | 9724   | 9824   | 9930   | 9508   |
| K22026 nucleoside kinase [EC:2.7.1.73 2.7.1.213 2.7.1.-]                                                              | 2      | 0      | 0      | 0      | 2      | 2      | 0      | 1      | 4      | 4      | 4      | 8      |
| K22601 oxamate carbamoyltransferase [EC:3.1.3.5]                                                                      | 686    | 686    | 724    | 748    | 505    | 550    | 498    | 612    | 824    | 843    | 807    | 909    |
| K22602 oxamate amidohydrolase [EC:3.5.1.126]                                                                          | 956    | 959    | 899    | 896    | 608    | 652    | 654    | 621    | 1278   | 1195   | 1158   | 1245   |
| K23264 phosphoribosylformylglycinamide synthase subunit PurS [EC:6.3.5.3]                                             | 14     | 16     | 15     | 16     | 2      | 5      | 4      | 2      | 19     | 35     | 19     | 51     |
| K23265 phosphoribosylformylglycinamide synthase subunit PurQ / glutaminase [EC:6.3.5.3 3.5.1.2]                       | 36     | 43     | 47     | 40     | 16     | 6      | 19     | 15     | 50     | 70     | 53     | 51     |
| K23269 phosphoribosylformylglycinamide synthase subunit PurL [EC:6.3.5.3]                                             | 115    | 126    | 122    | 149    | 30     | 40     | 29     | 16     | 133    | 160    | 137    | 158    |
| K23270 phosphoribosylformylglycinamide synthase subunit PurS [EC:6.3.5.3]                                             | 36     | 26     | 33     | 26     | 5      | 8      | 6      | 11     | 31     | 51     | 33     | 31     |
| ko00240 Pyrimidine metabolism                                                                                         | 120448 | 120448 | 121181 | 121053 | 126543 | 128294 | 126776 | 125646 | 129870 | 130885 | 129597 | 130410 |
| K00226 dihydroorotate dehydrogenase (fumarate) [EC:1.3.98.1]                                                          | 564    | 580    | 641    | 647    | 1926   | 1835   | 1959   | 1870   | 1445   | 1374   | 1317   | 1250   |
| K00254 dihydroorotate dehydrogenase [EC:1.3.5.2]                                                                      | 1807   | 1666   | 1607   | 1751   | 1165   | 1114   | 1060   | 1044   | 1148   | 1259   | 1176   | 1240   |
| K00560 thymidylate synthase [EC:2.1.1.45]                                                                             | 2636   | 2575   | 2688   | 2634   | 2925   | 2856   | 2896   | 2814   | 2874   | 2808   | 2929   | 2870   |
| K00609 aspartate carbamoyltransferase catalytic subunit [EC:2.1.3.2]                                                  | 2939   | 2896   | 2850   | 2874   | 3021   | 3172   | 3208   | 3139   | 2955   | 2907   | 3075   | 3068   |
| K00610 aspartate carbamoyltransferase regulatory subunit                                                              | 769    | 735    | 804    | 794    | 1095   | 1202   | 1096   | 1110   | 1211   | 1227   | 1249   | 1201   |
| K00756 pyrimidine-nucleoside phosphorylase [EC:2.4.2.2]                                                               | 463    | 442    | 446    | 439    | 81     | 93     | 84     | 97     | 330    | 387    | 360    | 349    |
| K00757 uridine phosphorylase [EC:2.4.2.3]                                                                             | 2183   | 2103   | 2314   | 2113   | 2573   | 2578   | 2680   | 2605   | 2910   | 3000   | 2945   | 2912   |
| K00758 thymidine phosphorylase [EC:2.4.2.4]                                                                           | 813    | 893    | 836    | 891    | 609    | 653    | 576    | 566    | 1222   | 1237   | 1100   | 1315   |
| K00761 uracil phosphoribosyltransferase [EC:2.4.2.9]                                                                  | 2157   | 2183   | 2135   | 2242   | 2502   | 2393   | 2458   | 2481   | 2619   | 2616   | 2505   | 2579   |
| K00762 orotate phosphoribosyltransferase [EC:2.4.2.10]                                                                | 2979   | 2878   | 3209   | 3023   | 2765   | 2761   | 2728   | 2734   | 3093   | 3056   | 3101   | 3005   |
| K00857 thymidine kinase [EC:2.7.1.21.48]                                                                              | 820    | 816    | 811    | 865    | 1564   | 1631   | 1663   | 1644   | 1519   | 1596   | 1547   | 1449   |
| K00876 uridine kinase [EC:2.7.1.48]                                                                                   | 2775   | 2805   | 2927   | 2935   | 5792   | 5796   | 5919   | 5533   | 5055   | 5071   | 5253   | 5061   |
| K00943 dTMP kinase [EC:2.7.4.9]                                                                                       | 773    | 786    | 699    | 754    | 480    | 520    | 570    | 498    | 781    | 814    | 742    | 735    |
| K00945 CMP/dCMP kinase [EC:2.7.4.25]                                                                                  | 1662   | 1789   | 1866   | 1810   | 2403   | 2393   | 2354   | 2287   | 2291   | 2369   | 2486   | 2314   |
| K01240 uridine nucleosidase [EC:3.2.2.3]                                                                              | 0      | 0      | 0      | 1      | 0      | 0      | 1      | 2      | 3      | 0      | 0      | 0      |
| K01464 dihydropyrimidinase [EC:3.5.2.2]                                                                               | 3509   | 3257   | 3061   | 3231   | 1774   | 1730   | 1630   | 1808   | 1484   | 1525   | 1433   | 1370   |
| K01465 dihydroorotase [EC:3.5.2.3]                                                                                    | 8609   | 8435   | 8482   | 8595   | 6462   | 6377   | 6196   | 6464   | 6230   | 5985   | 6074   | 6215   |
| K01485 cytosine/creatinine deaminase [EC:3.5.4.1 3.5.4.21]                                                            | 3946   | 4137   | 3722   | 3907   | 2167   | 2340   | 2245   | 2205   | 3905   | 4103   | 3980   | 3957   |
| K01489 cytidine deaminase [EC:3.5.4.5]                                                                                | 1112   | 1096   | 1205   | 1186   | 1343   | 1273   | 1280   | 1303   | 1687   | 1758   | 1738   | 1697   |
| K01493 dCMP deaminase [EC:3.5.4.12]                                                                                   | 724    | 744    | 762    | 708    | 1123   | 1211   | 1214   | 1074   | 1234   | 1026   | 1076   | 1087   |
| K01494 dCTP deaminase [EC:3.5.4.13]                                                                                   | 1440   | 1367   | 1399   | 1417   | 768    | 772    | 734    | 740    | 1105   | 1108   | 1076   | 1173   |
| K01520 dUTP pyrophosphatase [EC:3.6.1.23]                                                                             | 1968   | 1979   | 1980   | 1941   | 2141   | 2086   | 2055   | 2182   | 1868   | 1930   | 1921   | 1929   |
| K01591 orotidine-5'-phosphate decarboxylase [EC:4.1.1.23]                                                             | 2609   | 2494   | 2565   | 2615   | 2938   | 2865   | 2790   | 2940   | 2768   | 2611   | 2621   | 2746   |
| K01937 CTP synthase [EC:6.3.4.2]                                                                                      | 3440   | 3517   | 3557   | 3395   | 4528   | 4932   | 4744   | 4575   | 4789   | 4799   | 4742   | 4839   |
| K01954 carbamoyl-phosphate synthase [EC:6.3.5.5]                                                                      | 0      | 0      | 1      | 0      | 0      | 0      | 0      | 0      | 0      | 0      | 0      | 0      |
| K01955 carbamoyl-phosphate synthase large subunit [EC:6.3.5.5]                                                        | 11446  | 11724  | 11976  | 11789  | 17411  | 17349  | 17323  | 17253  | 16167  | 16086  | 16146  | 15808  |
| K01956 carbamoyl-phosphate synthase small subunit [EC:6.3.5.5]                                                        | 3413   | 3507   | 3550   | 3397   | 3829   | 3872   | 3800   | 3724   | 3568   | 3644   | 3572   | 3711   |
| K02823 dihydroorotate dehydrogenase electron transfer subunit                                                         | 887    | 920    | 995    |        |        |        |        |        |        |        |        |        |

|                                                                                                                                                              |        |        |        |        |        |        |        |        |        |        |        |        |
|--------------------------------------------------------------------------------------------------------------------------------------------------------------|--------|--------|--------|--------|--------|--------|--------|--------|--------|--------|--------|--------|
| K00812 aspartate aminotransferase [EC:2.6.1.1]                                                                                                               | 1589   | 1772   | 1943   | 1689   | 5232   | 5097   | 5317   | 5193   | 3844   | 3733   | 3875   | 3655   |
| K00813 aspartate aminotransferase [EC:2.6.1.1]                                                                                                               | 671    | 674    | 656    | 736    | 477    | 493    | 430    | 444    | 884    | 942    | 872    | 1056   |
| K01424 L-asparaginase [EC:3.5.1.1]                                                                                                                           | 3849   | 3972   | 3973   | 4000   | 7585   | 7501   | 7727   | 7685   | 7429   | 7388   | 7394   | 7118   |
| K01425 glutaminase [EC:3.5.1.2]                                                                                                                              | 1423   | 1361   | 1424   | 1428   | 2703   | 2855   | 3083   | 2739   | 2523   | 2349   | 2628   | 2450   |
| K01744 aspartate ammonia-lyase [EC:4.3.1.1]                                                                                                                  | 4427   | 4526   | 4316   | 4271   | 5404   | 5342   | 5430   | 5568   | 5061   | 4961   | 4983   | 4932   |
| K01755 argininosuccinate lyase [EC:4.3.2.1]                                                                                                                  | 5369   | 5397   | 5524   | 5321   | 5867   | 6017   | 6011   | 6088   | 5538   | 5625   | 5496   | 5635   |
| K01779 aspartate racemase [EC:5.1.1.13]                                                                                                                      | 530    | 565    | 483    | 574    | 426    | 482    | 409    | 398    | 374    | 434    | 408    | 412    |
| K01914 aspartate-ammonia ligase [EC:6.3.1.1]                                                                                                                 | 1802   | 1845   | 1862   | 1810   | 2827   | 2924   | 3004   | 2780   | 2999   | 3036   | 3042   | 2906   |
| K01940 argininosuccinate synthase [EC:6.3.4.5]                                                                                                               | 4155   | 4382   | 4200   | 3990   | 4692   | 4578   | 4660   | 4906   | 4226   | 4227   | 4107   | 4251   |
| K01953 asparagine synthase [glutamine-hydrolising] [EC:6.3.5.4]                                                                                              | 11561  | 11240  | 10660  | 10963  | 8426   | 8356   | 8249   | 8602   | 7075   | 6942   | 6910   | 6985   |
| K05597 glutamin-asparagin-lyase [EC:3.5.1.38]                                                                                                                | 209    | 199    | 178    | 188    | 110    | 92     | 104    | 115    | 64     | 62     | 56     | 71     |
| K09758 aspartate 4-decarboxylase [EC:4.1.1.12]                                                                                                               | 940    | 1089   | 1072   | 1119   | 2774   | 2888   | 2855   | 2967   | 2094   | 2022   | 2219   | 1939   |
| K11358 aspartate aminotransferase [EC:2.6.1.1]                                                                                                               | 502    | 502    | 518    | 516    | 147    | 125    | 149    | 145    | 447    | 472    | 411    | 468    |
| K13051 L-asparaginase / beta-aspartyl-peptidase [EC:3.5.1.1 3.4.19.5]                                                                                        | 657    | 610    | 607    | 647    | 478    | 581    | 556    | 459    | 737    | 781    | 709    | 770    |
| K13566 omega-amidase [EC:3.5.1.3]                                                                                                                            | 2149   | 2128   | 2191   | 2119   | 2595   | 2652   | 2570   | 2537   | 2126   | 2238   | 2171   | 2142   |
| K13821 RHH-type transcriptional regulator, proline utilization region repressor / proline dehydrogenase / delta 1-pyrroline-5-carboxylate dehydrogenase [Ei] | 6056   | 5732   | 5737   | 5696   | 3788   | 3676   | 3667   | 3932   | 4224   | 4224   | 3917   | 4216   |
| K14260 alanine-synthesizing transaminase [EC:2.6.1.66 2.6.1.2]                                                                                               | 2511   | 2457   | 2615   | 2520   | 1531   | 1566   | 1519   | 1504   | 1910   | 1937   | 1854   | 1927   |
| K14681 argininosuccinate lyase / amino-acid N-acetyltransferase [EC:4.3.2.1 2.3.1.1]                                                                         | 8      | 8      | 12     | 9      | 10     | 12     | 15     | 11     | 16     | 11     | 14     | 12     |
| K19244 alanine dehydrogenase [EC:1.4.1.1]                                                                                                                    | 0      | 3      | 0      | 2      | 0      | 0      | 1      | 2      | 4      | 1      | 2      | 10     |
| K22457 asparagine---oxo-acid transaminase [EC:2.6.1.14]                                                                                                      | 82     | 55     | 80     | 70     | 22     | 27     | 16     | 6      | 62     | 102    | 68     | 107    |
| ko00260 Glycine, serine and threonine metabolism                                                                                                             | 158044 | 156295 | 152537 | 155504 | 140898 | 141299 | 139962 | 141766 | 141694 | 139878 | 139509 | 140126 |
| K00003 homoserine dehydrogenase [EC:1.1.1.3]                                                                                                                 | 2777   | 2707   | 2779   | 2703   | 1433   | 1334   | 1351   | 1461   | 1522   | 1514   | 1523   | 1526   |
| K00060 threonine 3-dehydrogenase [EC:1.1.1.103]                                                                                                              | 1000   | 949    | 1044   | 1073   | 490    | 592    | 496    | 493    | 1565   | 1590   | 1511   | 1580   |
| K00108 choline dehydrogenase [EC:1.1.99.1]                                                                                                                   | 6688   | 6362   | 6082   | 6470   | 3340   | 3240   | 3512   | 3591   | 3399   | 3448   | 3156   | 3252   |
| K00130 betaine-aldehyde dehydrogenase [EC:1.2.1.8]                                                                                                           | 3519   | 3673   | 3393   | 3561   | 1726   | 1657   | 1553   | 1708   | 2545   | 2587   | 2481   | 2467   |
| K00133 aspartate-semialdehyde dehydrogenase [EC:1.2.1.11]                                                                                                    | 3907   | 4075   | 3992   | 4083   | 3987   | 4038   | 4111   | 3983   | 4784   | 4641   | 4814   | 4672   |
| K00274 monoamine oxidase [EC:1.4.3.4]                                                                                                                        | 2541   | 2664   | 2610   | 2588   | 1445   | 1409   | 1337   | 1544   | 864    | 874    | 791    | 769    |
| K00276 primary-amine oxidase [EC:1.4.3.21]                                                                                                                   | 799    | 774    | 720    | 792    | 209    | 222    | 195    | 209    | 1455   | 1642   | 1487   | 1568   |
| K00302 sarcosine oxidase, subunit alpha [EC:1.5.3.1]                                                                                                         | 5148   | 5221   | 4686   | 4775   | 2694   | 2506   | 2568   | 2926   | 1705   | 1576   | 1489   | 1702   |
| K00303 sarcosine oxidase, subunit beta [EC:1.5.3.1]                                                                                                          | 1941   | 1835   | 1589   | 1816   | 968    | 904    | 927    | 992    | 623    | 552    | 526    | 603    |
| K00304 sarcosine oxidase, subunit delta [EC:1.5.3.1]                                                                                                         | 519    | 561    | 507    | 502    | 340    | 321    | 268    | 322    | 173    | 193    | 188    | 214    |
| K00305 sarcosine oxidase, subunit gamma [EC:1.5.3.1]                                                                                                         | 6      | 13     | 2      | 3      | 3      | 3      | 1      | 5      | 4      | 4      | 3      | 1      |
| K00314 sarcosine dehydrogenase [EC:1.5.8.3]                                                                                                                  | 0      | 0      | 0      | 0      | 0      | 0      | 0      | 0      | 0      | 1      | 0      | 0      |
| K00613 glycine amidinotransferase [EC:2.1.4.1]                                                                                                               | 11     | 8      | 5      | 11     | 12     | 9      | 7      | 12     | 19     | 30     | 26     | 31     |
| K00639 glycine C-acetyltransferase [EC:2.3.1.29]                                                                                                             | 1585   | 1696   | 1665   | 1695   | 2989   | 3283   | 3263   | 3807   | 2927   | 2976   | 2973   | 2938   |
| K00643 5-aminolevulinate synthase [EC:2.3.1.37]                                                                                                              | 1      | 0      | 0      | 1      | 2      | 1      | 3      | 0      | 2      | 1      | 3      | 3      |
| K00836 diaminobutyrate-2-oxoglutarate transaminase [EC:2.6.1.76]                                                                                             | 1899   | 1881   | 1861   | 1888   | 1116   | 1101   | 1039   | 1063   | 1493   | 1590   | 1377   | 1548   |
| K00872 homoserine kinase [EC:2.7.1.39]                                                                                                                       | 690    | 706    | 656    | 708    | 424    | 458    | 492    | 439    | 852    | 883    | 918    | 982    |
| K00928 aspartate kinase [EC:2.7.2.4]                                                                                                                         | 5433   | 5415   | 5737   | 5526   | 7655   | 7537   | 7771   | 7396   | 6513   | 6555   | 6530   | 6417   |
| K01620 threonine aldolase [EC:4.1.2.48]                                                                                                                      | 5121   | 5056   | 4889   | 5075   | 4321   | 4190   | 4266   | 4486   | 4014   | 3819   | 3782   | 3979   |
| K01695 tryptophan synthase alpha chain [EC:4.2.1.20]                                                                                                         | 2398   | 2529   | 2414   | 2500   | 2507   | 2534   | 2459   | 2570   | 2450   | 2351   | 2350   | 2428   |
| K01696 tryptophan synthase beta chain [EC:4.2.1.22]                                                                                                          | 3407   | 3488   | 3374   | 3542   | 3727   | 3666   | 3808   | 3760   | 3718   | 3670   | 3836   | 3655   |
| K01697 cystathionine beta-synthase [EC:4.2.1.20]                                                                                                             | 2036   | 2021   | 1964   | 2122   | 1134   | 1258   | 1185   | 1214   | 1517   | 1575   | 1531   | 1593   |
| K01733 threonine synthase [EC:4.2.3.1]                                                                                                                       | 5015   | 4928   | 4992   | 5061   | 5326   | 5341   | 5175   | 5358   | 5217   | 4935   | 5149   | 5089   |
| K01752 L-serine dehydratase [EC:4.3.1.17]                                                                                                                    | 6980   | 6897   | 6631   | 6587   | 6102   | 6057   | 6175   | 6262   | 6138   | 6343   | 6198   | 6353   |
| K01753 D-serine dehydratase [EC:4.3.1.18]                                                                                                                    | 3125   | 3132   | 2796   | 3041   | 1806   | 1728   | 1710   | 1741   | 2098   | 2015   | 2003   | 1984   |
| K01754 threonine dehydratase [EC:4.3.1.19]                                                                                                                   | 6866   | 6744   | 6331   | 6812   | 3613   | 3717   | 3565   | 3712   | 4149   | 4296   | 4212   | 4377   |
| K01758 cystathionine gamma-lyase [EC:4.4.1.1]                                                                                                                | 2729   | 2548   | 2406   | 2518   | 1539   | 1646   | 1410   | 1619   | 1603   | 1519   | 1478   | 1509   |
| K02204 homoserine kinase type II [EC:2.7.1.39]                                                                                                               | 1420   | 1487   | 1433   | 1311   | 809    | 724    | 781    | 800    | 479    | 379    | 451    | 469    |
| K06001 tryptophan synthase beta chain [EC:4.2.1.20]                                                                                                          | 1743   | 1712   | 1843   | 1772   | 3103   | 2922   | 3130   | 3111   | 2950   | 2971   | 3086   | 2895   |
| K06720 L-ectoine synthase [EC:4.2.1.108]                                                                                                                     | 0      | 0      | 0      | 0      | 2      | 1      | 1      | 0      | 0      | 2      | 0      | 1      |
| K11440 choline dehydrogenase [EC:1.1.1.1]                                                                                                                    | 1      | 0      | 0      | 0      | 0      | 1      | 1      | 0      | 0      | 0      | 0      | 0      |
| K12524 bifunctional aspartokinase / homoserine dehydrogenase 1 [EC:2.7.2.4 1.1.1.3]                                                                          | 3160   | 3193   | 3211   | 3233   | 6630   | 6536   | 6608   | 6626   | 5999   | 5925   | 6009   | 5745   |
| K12525 bifunctional aspartokinase / homoserine dehydrogenase 2 [EC:2.7.2.4 1.1.1.3]                                                                          | 1610   | 1664   | 1653   | 1589   | 1158   | 1176   | 1126   | 1080   | 2170   | 2228   | 2181   | 2255   |
| K13290 serine---pyruvate transaminase [EC:2.6.1.51]                                                                                                          | 1      | 0      | 1      | 0      | 2      | 0      | 0      | 0      | 0      | 0      | 0      | 0      |
| K13745 L-2,4-diaminobutyrate decarboxylase [EC:4.1.1.86]                                                                                                     | 783    | 741    | 729    | 765    | 481    | 520    | 533    | 537    | 1070   | 1082   | 965    | 1120   |
| K15783 ectoine hydrolase [EC:3.5.4.44]                                                                                                                       | 2      | 0      | 0      | 1      | 3      | 1      | 1      | 0      | 0      | 0      | 2      | 2      |
| K15784 N2-acetyl-L-2,4-diaminobutanoate deacetylase [EC:3.5.1.125]                                                                                           | 0      | 0      | 2      | 1      | 0      | 0      | 1      | 0      | 5      | 6      | 2      | 9      |
| K15785 L-2,4-diaminobutyrate transaminase [EC:2.6.1.76]                                                                                                      | 17     | 12     | 14     | 19     | 0      | 2      | 3      | 0      | 8      | 13     | 11     | 9      |
| K15786 aspartate-semialdehyde dehydrogenase [EC:1.2.1.-]                                                                                                     | 2      | 1      | 0      | 0      | 1      | 0      | 1      | 0      | 0      | 0      | 2      | 0      |
| K20498 D-serine ammonia-lyase [EC:4.3.1.18]                                                                                                                  | 2      | 2      | 0      | 0      | 1      | 0      | 1      | 0      | 0      | 0      | 0      | 1      |
| ko00270 Cysteine and methionine metabolism                                                                                                                   | 136148 | 134863 | 135425 | 136507 | 136745 | 137420 | 136655 | 137130 | 140832 | 141208 | 139817 | 139860 |
| K00547 homocysteine S-methyltransferase [EC:2.1.1.10]                                                                                                        | 663    | 682    | 600    | 663    | 454    | 423    | 423    | 455    | 884    | 861    | 741    | 856    |
| K00548 S-methyltetrahydrofolate---homocysteine methyltransferase [EC:2.1.1.13]                                                                               | 8752   | 8490   | 8722   | 8756   | 9047   | 9115   | 9238   | 9191   | 9750   | 9455   | 9498   | 9473   |
| K00549 S-methyltetrahydropteroylglutamate---homocysteine methyltransferase [EC:2.1.1.14]                                                                     | 4885   | 4929   | 4876   | 5003   | 3146   | 3387   | 3120   | 3223   | 4035   | 4020   | 4335   | 4511   |
| K00558 DNA (cytosine-5)-methyltransferase 1 [EC:2.1.1.37]                                                                                                    | 3000   | 3049   | 3137   | 3037   | 5781   | 6034   | 6013   | 6006   | 5676   | 5447   | 5471   | 5544   |
| K00772 5'-methylthioadenosine phosphorylase [EC:2.4.2.28]                                                                                                    | 100    | 104    | 114    | 114    | 72     | 78     | 59     | 84     | 141    | 140    | 132    | 147    |
| K00789 S-adenosylmethionine synthetase [EC:2.5.1.6]                                                                                                          | 4569   | 4549   | 4585   | 4822   | 4605   | 4545   | 4364   | 4428   | 4753   | 4870   | 4666   | 4677   |
| K00797 spermidine synthase [EC:2.5.1.16]                                                                                                                     | 3573   | 3591   | 3385   | 3518   | 2135   | 2097   | 1887   | 2094   | 1797   | 1759   | 1669   | 1721   |
| K00816 kynurenine---oxoglutarate transaminase / cysteine-S-conjugate beta-lyase / glutamine---phenylpyruvate transaminase [EC:2.6.1.7 4.4.1.13 2.6.1.64]     | 0      | 0      | 0      | 0      | 0      | 0      | 0      | 0      | 0      | 1      | 0      | 0      |
| K00826 branched-chain amino acid aminotransferase [EC:2.6.1.42]                                                                                              | 3364   | 3225   | 3321   | 3308   | 4020   | 3688   | 3853   | 3828   | 3706   | 3768   | 3705   | 3625   |
| K00832 aromatic-amino-acid transaminase [EC:2.6.1.57]                                                                                                        | 4599   | 4472   | 4392   | 4485   | 2742   | 2763   | 2799   | 2815   | 2957   | 2867   | 2938   | 3036   |
| K00838 aromatic amino acid aminotransferase I / 2-aminoadipate transaminase [EC:2.6.1.57 2.6.1.39 2.6.1.27 2.6.1.5]                                          | 0      | 0      | 0      | 0      | 0      | 0      | 0      | 0      | 0      | 1      | 0      | 0      |
| K00899 S-methylthioribose kinase [EC:2.7.1.100]                                                                                                              | 794    | 757    | 688    | 831    | 637    | 707    | 698    | 621    | 1106   | 1180   | 1034   | 1210   |
| K01243 adenosylhomocysteine nucleosidase [EC:3.2.2.9]                                                                                                        | 1316   | 1216   | 1237   | 1342   | 1725   | 1655   | 1725   | 1685   | 1752   | 1740   | 1923   | 1808   |
| K01251 adenosylhomocysteinase [EC:3.3.1.1]                                                                                                                   | 2101   | 2254   | 2247   | 2234   | 3792   | 3988   | 3703   | 3764   | 3716   | 3771   | 3663   | 3584   |
| K01505 L-aminooxypropane-1-carboxylate deaminase [EC:3.5.99.7]                                                                                               | 1155   | 1089   | 1002   | 1080   | 600    | 570    | 579    | 665    | 322    | 352    | 341    | 321    |
| K01611 S-adenosylmethionine decarboxylase [EC:4.1.1.50]                                                                                                      | 2392   | 2220   | 2317   | 2268   | 1395   | 1415   | 1280   | 1362   | 1324   | 1416   | 1348   | 1333   |
| K01740 O-acetylhomoserine (thiol)-lyase [EC:2.5.1.49]                                                                                                        | 4902   | 4900   | 5249   | 4953   | 6668   | 6795   | 7074   | 6918   | 5724   | 5624   | 5536   | 5354   |
| K01760 cysteine-S-conjugate beta-lyase [EC:4.4.1.13]                                                                                                         | 1260   | 1241   | 1256   | 1308   | 802    | 879    | 874    | 852    | 2225   | 2238   | 2184   | 2242   |
| K01761 methionine-gamma-lyase [EC:4.4.1.11]                                                                                                                  | 33     | 17     | 26     | 19     | 94     | 134    | 111    | 106    | 267    | 255    | 222    | 233    |
| K01919 glutamate---cysteine ligase [EC:6.3.2.2]                                                                                                              | 3441   | 3578   | 3483   | 3575   | 2210   | 2153   | 2038   | 2248   | 2446   | 2478   | 2536   | 2573   |
| K01920 glutathione synthase [EC:6.3.2.3]                                                                                                                     | 2012   | 2093   | 1998   | 2020   | 1250   | 1273   | 1269   | 1275   | 1310   | 1230   | 1180   | 1358   |
| K05396 D-cysteine desulfhydrase [EC:4.4.1.15]                                                                                                                | 689    | 621    | 625    | 710    | 509    | 588    | 511    | 532    | 883    | 985    | 912    | 1012   |
| K07173 S-ribosylhomocysteine lyase [EC:4.4.1.21]                                                                                                             | 720    | 706    | 722    | 737    | 534    | 536    | 522    | 530    | 602    | 658    | 600    | 702    |
| K08963 methylthioribose-1-phosphate isomerase [EC:5.3.1.23]                                                                                                  | 1792   | 1744   | 1840   | 1799   | 1142   | 1180   | 1178   | 1162   | 1544   | 1551   | 1516   | 1635   |
| K08964 methylthioribulose-1-phosphate dehydratase [EC:4.2.1.109]                                                                                             | 1178   | 1136   | 1117   | 1183   | 781    | 678    | 662    | 732    | 687    | 744    | 683    | 730    |
| K08965 2,3-diketo-5-methylthiopentyl-1-phosphate enolase [EC:3.5.3.5]                                                                                        | 374    | 317    | 340    | 310    | 50     | 63     | 67     | 58     | 161    | 190    | 204    | 192    |
| K08966 2-hydroxy-3-keto-5-methylthiopentyl-1-phosphate phosphatase [EC:3.1.3.87]                                                                             | 1      | 0      | 2      | 0      | 0      | 0      | 0      | 0      | 0      | 0      | 0      | 0      |
| K08967 1,2-dihydroxy-3-keto-5-methylthiopentene dioxigenase [EC:1.13.11.53 1.13.11.54]                                                                       | 635    | 712    | 620    | 726    | 513    | 555    | 453    | 503    | 551    | 513    | 469    | 544    |
| K08968 L-methionine (R)-S-oxide reductase [EC:1.8.4.14]                                                                                                      | 1228   | 1262   | 1199   | 1180   | 1435   | 1560   | 1534   | 1530   | 1376   | 1356   | 1292   |        |

|                                                                                                      |        |        |        |        |       |       |       |       |       |       |       |       |
|------------------------------------------------------------------------------------------------------|--------|--------|--------|--------|-------|-------|-------|-------|-------|-------|-------|-------|
| K00053 ketol-acid reductoisomerase [EC:1.1.1.86]                                                     | 3866   | 3730   | 3880   | 3924   | 4061  | 4120  | 3962  | 4071  | 4363  | 4431  | 4412  | 4490  |
| K00835 valine--pyruvate aminotransferase [EC:2.6.1.66]                                               | 817    | 806    | 807    | 777    | 591   | 582   | 644   | 578   | 1124  | 1048  | 956   | 1128  |
| K01687 dihydroxy-acid dehydratase [EC:4.2.1.9]                                                       | 8688   | 8322   | 8541   | 8619   | 6945  | 7119  | 6911  | 7090  | 8859  | 9319  | 9307  | 9384  |
| K01702 3-isopropylmalate dehydratase [EC:4.2.1.33]                                                   | 1      | 0      | 0      | 0      | 0     | 0     | 0     | 0     | 0     | 0     | 1     | 0     |
| K21360 3-isopropylmalate/methylthioalkylmalate dehydrogenase [EC:1.1.1.85 1.1.1.-]                   | 0      | 0      | 0      | 0      | 1     | 0     | 0     | 0     | 0     | 0     | 0     | 0     |
| ko00300 Lysine biosynthesis                                                                          | 57096  | 56875  | 57438  | 57773  | 66099 | 66061 | 66541 | 65933 | 65460 | 66424 | 65814 | 65405 |
| K00215 4-hydroxy-tetrahydrodipicolinate reductase [EC:1.17.1.8]                                      | 2573   | 2480   | 2670   | 2483   | 3013  | 2926  | 2920  | 2925  | 2740  | 2726  | 2703  | 2757  |
| K00290 saccharopine dehydrogenase [NAD+, L-lysine forming] [EC:1.5.1.7]                              | 886    | 888    | 1022   | 899    | 2611  | 2589  | 2683  | 2681  | 1898  | 1907  | 1951  | 1821  |
| K00293 saccharopine dehydrogenase [NADP+, L-glutamate forming] [EC:1.5.1.10]                         | 0      | 0      | 2      | 0      | 0     | 0     | 0     | 0     | 0     | 0     | 0     | 1     |
| K00674 2,3,4,5-tetrahydroxydipyr-dim-2,6-dicarboxylate N-succinyltransferase [EC:2.3.1.117]          | 1486   | 1409   | 1370   | 1525   | 1589  | 1562  | 1515  | 1477  | 1603  | 1540  | 1563  | 1547  |
| K00821 acetylornithine/N-succinyl-diaminopimelate aminotransferase [EC:2.6.1.11 2.6.1.17]            | 3969   | 3790   | 4033   | 4230   | 4166  | 4199  | 4155  | 4092  | 4137  | 4117  | 4016  | 4109  |
| K00841 aminotransferase [EC:2.6.1.-]                                                                 | 51     | 51     | 76     | 68     | 23    | 32    | 26    | 24    | 73    | 82    | 67    | 65    |
| K01439 succinyl-diaminopimelate desuccinylase [EC:3.5.1.18]                                          | 4200   | 4116   | 3902   | 4232   | 1963  | 1900  | 1906  | 1850  | 3574  | 3814  | 3592  | 3793  |
| K01586 diaminopimelate decarboxylase [EC:4.1.1.20]                                                   | 3521   | 3526   | 3366   | 3564   | 3677  | 3768  | 3646  | 3791  | 4079  | 4198  | 4044  | 3920  |
| K01714 4-hydroxy-tetrahydrodipicolinate synthase [EC:4.3.3.7]                                        | 7653   | 7602   | 7412   | 7583   | 5481  | 5507  | 5501  | 5630  | 5832  | 6314  | 6024  | 6051  |
| K01778 diaminopimelate epimerase [EC:5.1.1.7]                                                        | 3391   | 3264   | 3244   | 3354   | 2935  | 2940  | 2978  | 2942  | 2879  | 3109  | 2908  | 3027  |
| K01928 UDP-N-acetylmuramoyl-L-alanyl-D-glutamate-2,6-diaminopimelate ligase [EC:6.3.2.13]            | 3073   | 3120   | 3241   | 3076   | 4560  | 4751  | 4650  | 4488  | 4568  | 4635  | 4478  | 4797  |
| K01929 UDP-N-acetylmuramoyl-tripeptide-D-alanyl-D-alanine ligase [EC:6.3.2.10]                       | 3391   | 3468   | 3536   | 3528   | 4813  | 5042  | 5129  | 4962  | 4166  | 4428  | 4240  | 4184  |
| K03340 diaminopimelate dehydrogenase [EC:1.4.1.16]                                                   | 1012   | 1010   | 1112   | 1043   | 1656  | 1695  | 1878  | 1730  | 1551  | 1637  | 1856  | 1678  |
| K05822 tetrahydrodipicolinate N-acetyltransferase [EC:2.3.1.89]                                      | 70     | 50     | 64     | 63     | 76    | 76    | 33    | 34    | 78    | 73    | 66    | 74    |
| K05823 N-acetyldiaminopimelate deacetylase [EC:3.5.1.47]                                             | 54     | 66     | 77     | 72     | 8     | 6     | 8     | 12    | 49    | 73    | 47    | 74    |
| K05824 homoisocitrate dehydrogenase [EC:1.1.1.87]                                                    | 3      | 0      | 0      | 1      | 0     | 0     | 0     | 0     | 9     | 13    | 13    | 9     |
| K05825 2-aminoadipate transaminase [EC:2.6.1.-]                                                      | 954    | 1032   | 1020   | 946    | 2515  | 2474  | 2406  | 2580  | 2427  | 2339  | 2483  | 2353  |
| K05827 [lysine-biosynthesis-protein LysW]--L-2-aminoadipate ligase [EC:6.3.2.43]                     | 0      | 0      | 0      | 0      | 0     | 0     | 0     | 0     | 2     | 3     | 0     | 0     |
| K05828 LysW-gamma-L-alpha-aminoadipate/LysW-L-glutamate kinase [EC:2.7.2.-]                          | 0      | 0      | 0      | 0      | 0     | 2     | 0     | 0     | 0     | 0     | 0     | 0     |
| K05829 LysW-gamma-L-alpha-aminoadipyl-6-phosphate/LysW-L-glutamyl-5-phosphate reductase [EC:1.2.1.-] | 2      | 2      | 0      | 0      | 0     | 4     | 3     | 0     | 1     | 2     | 3     | 1     |
| K05830 LysW-gamma-L-lysine/LysW-L-ornithine aminotransferase [EC:2.6.1.-]                            | 0      | 0      | 0      | 0      | 0     | 0     | 0     | 0     | 0     | 3     | 0     | 1     |
| K05831 [amino group carrier protein]-lysine/ornithine hydrolase [EC:3.5.1.130 3.5.1.132]             | 0      | 0      | 2      | 0      | 0     | 0     | 0     | 0     | 2     | 0     | 0     | 1     |
| K10206 L1-diaminopimelate aminotransferase [EC:2.6.1.83]                                             | 2008   | 2082   | 2134   | 2131   | 5095  | 5006  | 5048  | 5036  | 4180  | 3948  | 4045  | 3924  |
| K14267 N-succinyl-diaminopimelate aminotransferase [EC:2.6.1.17]                                     | 1897   | 1850   | 1768   | 1823   | 1042  | 942   | 1071  | 1109  | 606   | 564   | 626   | 546   |
| K15792 murF/murF fusion protein [EC:6.3.2.13 6.3.2.10]                                               | 7      | 5      | 5      | 3      | 3     | 9     | 6     | 12    | 6     | 7     | 6     | 9     |
| K16180 methylornithine synthase [EC:5.4.99.58]                                                       | 4      | 5      | 2      | 5      | 1     | 0     | 3     | 3     | 0     | 0     | 2     | 3     |
| K16181 pyrrolysine biosynthesis protein PylC                                                         | 0      | 2      | 2      | 4      | 0     | 0     | 0     | 1     | 2     | 0     | 0     | 1     |
| K16182 pyrrolysine biosynthesis protein PylD                                                         | 0      | 0      | 0      | 1      | 0     | 0     | 0     | 2     | 0     | 0     | 0     | 0     |
| K17450 homoaconitase [EC:4.2.1.-]                                                                    | 2      | 1      | 2      | 1      | 6     | 1     | 3     | 3     | 0     | 3     | 3     | 1     |
| ko00310 Lysine degradation                                                                           | 64790  | 64535  | 62440  | 64129  | 48507 | 47720 | 47077 | 48598 | 50967 | 50225 | 49737 | 51131 |
| K00137 aminobutyraldehyde dehydrogenase [EC:1.2.1.19]                                                | 2653   | 2680   | 2673   | 2777   | 1576  | 1569  | 1579  | 1506  | 1804  | 1643  | 1648  | 1625  |
| K00468 lysine 2-monoxygenase [EC:1.13.12.2]                                                          | 0      | 0      | 0      | 0      | 0     | 0     | 0     | 0     | 0     | 0     | 0     | 1     |
| K00824 D-alanine transaminase [EC:2.6.1.21]                                                          | 303    | 263    | 271    | 266    | 243   | 286   | 267   | 233   | 133   | 123   | 116   | 127   |
| K01506 5-aminopentanamide [EC:3.5.1.30]                                                              | 6      | 9      | 12     | 13     | 3     | 4     | 3     | 4     | 0     | 0     | 0     | 0     |
| K01582 lysine decarboxylase [EC:4.1.1.18]                                                            | 2277   | 2322   | 2086   | 2428   | 1315  | 1493  | 1354  | 1251  | 3888  | 3932  | 3770  | 3918  |
| K01843 lysine 2,3-aminomutase [EC:5.4.3.2]                                                           | 1370   | 1425   | 1543   | 1341   | 4447  | 4328  | 4465  | 4320  | 2925  | 2854  | 3203  | 2965  |
| K01844 beta-lysine 5,6-aminomutase alpha subunit [EC:5.4.3.3]                                        | 0      | 0      | 0      | 0      | 2     | 4     | 3     | 0     | 0     | 6     | 3     | 1     |
| K03894 N2-citryl-N6-acetyl-N6-hydroxylysine synthase [EC:6.3.2.38]                                   | 0      | 2      | 3      | 0      | 3     | 2     | 3     | 5     | 3     | 6     | 3     | 6     |
| K03895 aerobactin synthase [EC:6.3.2.39]                                                             | 0      | 0      | 5      | 3      | 2     | 5     | 2     | 0     | 6     | 4     | 6     | 5     |
| K03896 acetyl CoA:N6-hydroxylysine acetyl transferase [EC:2.3.1.102]                                 | 0      | 0      | 0      | 0      | 1     | 3     | 5     | 2     | 0     | 4     | 1     | 0     |
| K03897 lysine N6-hydroxylase [EC:1.14.13.59]                                                         | 0      | 0      | 1      | 0      | 3     | 0     | 0     | 4     | 6     | 14    | 3     | 9     |
| K09251 putrescine aminotransferase [EC:2.6.1.82]                                                     | 952    | 892    | 828    | 920    | 657   | 722   | 611   | 649   | 1272  | 1295  | 1186  | 1340  |
| K13609 delta1-piperidine-2-carboxylate reductase [EC:1.5.1.21]                                       | 2009   | 1931   | 1872   | 1844   | 971   | 938   | 812   | 909   | 1270  | 1315  | 1210  | 1291  |
| K15736 L-2-hydroxyglutarate oxidase [EC:1.1.5.-]                                                     | 446    | 514    | 435    | 490    | 148   | 132   | 135   | 175   | 1074  | 1036  | 947   | 1114  |
| K15737 glutarate hydroxylase [EC:1.14.11.-]                                                          | 375    | 389    | 386    | 378    | 167   | 135   | 153   | 133   | 908   | 841   | 830   | 877   |
| K18011 beta-lysine 5,6-aminomutase beta subunit [EC:5.4.3.3]                                         | 0      | 0      | 0      | 1      | 2     | 0     | 1     | 2     | 4     | 0     | 0     | 1     |
| K18012 L-erythro-3,5-diaminohexanoate dehydrogenase [EC:1.4.1.11]                                    | 0      | 0      | 0      | 0      | 3     | 3     | 2     | 1     | 4     | 2     | 4     | 1     |
| K18013 3-keto-5-aminohexanoate cleavage enzyme [EC:2.3.1.247]                                        | 33     | 33     | 34     | 33     | 10    | 5     | 6     | 8     | 52    | 54    | 42    | 64    |
| K18014 3-aminobutyryl-CoA ammonia-lyase [EC:4.3.1.14]                                                | 0      | 0      | 0      | 0      | 1     | 4     | 1     | 2     | 2     | 0     | 3     | 2     |
| K21672 2,4-diaminopentanoate dehydrogenase [EC:1.4.1.12 1.4.1.26]                                    | 352    | 395    | 378    | 380    | 86    | 88    | 98    | 97    | 245   | 298   | 257   | 286   |
| K23385 D-ornithine/D-lysine decarboxylase [EC:4.1.1.116]                                             | 9      | 8      | 6      | 11     | 0     | 0     | 0     | 0     | 0     | 0     | 0     | 0     |
| ko00220 Arginine biosynthesis                                                                        | 88438  | 87351  | 86788  | 87091  | 82048 | 81614 | 81599 | 82787 | 79394 | 73370 | 73133 | 73303 |
| K00145 N-acetyl-gamma-glutamyl-phosphate reductase [EC:1.2.1.38]                                     | 3863   | 3704   | 3705   | 3740   | 4147  | 4166  | 4168  | 4274  | 3582  | 3664  | 3889  | 3713  |
| K00611 ornithine carbamoyltransferase [EC:2.1.3.3]                                                   | 4632   | 4603   | 4623   | 4517   | 2496  | 2427  | 2461  | 2531  | 2931  | 3050  | 2917  | 2933  |
| K00619 amino-acid N-acetyltransferase [EC:2.3.1.1]                                                   | 17     | 31     | 19     | 21     | 4     | 5     | 8     | 2     | 33    | 40    | 26    | 44    |
| K00620 glutamate N-acetyltransferase / amino-acid N-acetyltransferase [EC:2.3.1.35 2.3.1.1]          | 2449   | 2332   | 2459   | 2494   | 1268  | 1313  | 1207  | 1291  | 1292  | 1226  | 1303  | 1266  |
| K00818 acetylornithine aminotransferase [EC:2.6.1.11]                                                | 0      | 3      | 1      | 1      | 3     | 1     | 3     | 1     | 2     | 1     | 1     | 0     |
| K00930 acetylglutamate kinase [EC:2.7.2.8]                                                           | 2976   | 3045   | 2974   | 2812   | 3129  | 3150  | 3037  | 3011  | 3040  | 2852  | 2813  | 2924  |
| K01438 acetylornithine deacetylase [EC:3.5.1.16]                                                     | 5644   | 5532   | 5365   | 5417   | 5429  | 5466  | 5415  | 5537  | 4210  | 4031  | 3917  | 3952  |
| K01457 allophanate hydrolase [EC:3.5.1.54]                                                           | 401    | 333    | 316    | 417    | 532   | 607   | 527   | 569   | 0     | 0     | 2     | 0     |
| K01476 arginase [EC:3.5.3.1]                                                                         | 330    | 351    | 343    | 337    | 207   | 222   | 250   | 209   | 640   | 626   | 603   | 652   |
| K01478 arginine deiminase [EC:3.5.3.6]                                                               | 2289   | 2248   | 2325   | 2369   | 1391  | 1330  | 1307  | 1307  | 979   | 930   | 902   | 1032  |
| K01941 urea carboxylase [EC:6.3.4.6]                                                                 | 776    | 742    | 706    | 764    | 1071  | 1087  | 1083  | 1123  | 1     | 3     | 4     | 4     |
| K14677 aminoacylase [EC:3.5.1.14]                                                                    | 1      | 0      | 3      | 1      | 0     | 1     | 1     | 0     | 0     | 1     | 0     | 2     |
| K14682 amino-acid N-acetyltransferase [EC:2.3.1.1]                                                   | 2813   | 2674   | 2591   | 2609   | 1617  | 1542  | 1486  | 1567  | 1753  | 1775  | 1615  | 1774  |
| K22477 N-acetylglutamate synthase [EC:2.3.1.1]                                                       | 150    | 139    | 122    | 126    | 29    | 20    | 19    | 29    | 116   | 119   | 136   | 117   |
| ko00330 Arginine and proline metabolism                                                              | 122379 | 121549 | 116445 | 119568 | 85355 | 84913 | 82894 | 86883 | 84914 | 83852 | 82967 | 84481 |
| K00147 glutamate-5-semialdehyde dehydrogenase [EC:1.2.1.41]                                          | 3111   | 3201   | 3251   | 3186   | 4225  | 4097  | 4268  | 4323  | 4220  | 4145  | 4361  | 4216  |
| K00286 pyrroline-5-carboxylate reductase [EC:1.5.1.2]                                                | 1964   | 1999   | 1944   | 1992   | 2477  | 2654  | 2443  | 2434  | 2616  | 2680  | 2738  | 2650  |
| K00316 spermidine dehydrogenase [EC:1.5.99.6]                                                        | 2957   | 3020   | 2903   | 2924   | 1666  | 1437  | 1342  | 1524  | 947   | 856   | 817   | 896   |
| K00318 proline dehydrogenase [EC:1.5.5.2]                                                            | 8      | 14     | 3      | 7      | 2     | 0     | 2     | 0     | 2     | 0     | 0     | 0     |
| K00472 prolyl 4-hydroxylase [EC:1.14.11.2]                                                           | 1      | 0      | 0      | 0      | 0     | 0     | 0     | 0     | 0     | 0     | 0     | 0     |
| K00657 diamine N-acetyltransferase [EC:2.3.1.57]                                                     | 1602   | 1692   | 1729   | 1763   | 1758  | 1840  | 1728  | 1747  | 1676  | 1784  | 1627  | 1624  |
| K00673 arginine N-succinyltransferase [EC:2.3.1.109]                                                 | 2463   | 2353   | 2273   | 2345   | 1256  | 1318  | 1306  | 1349  | 1934  | 2052  | 1914  | 2026  |
| K00819 ornithine--oxo-acid transaminase [EC:2.6.1.13]                                                | 137    | 149    | 175    | 156    | 203   | 235   | 227   | 179   | 14    | 35    | 27    | 27    |
| K00840 succinylornithine aminotransferase [EC:2.6.1.18]                                              | 3157   | 3003   | 3022   | 3106   | 1624  | 1658  | 1585  | 1761  | 2566  | 2339  | 2474  | 2452  |
| K00931 glutamate 5-kinase [EC:2.7.2.11]                                                              | 3625   | 3469   | 3519   | 3619   | 4005  | 3881  | 4175  | 4081  | 3738  | 3631  | 3897  | 3850  |
| K01259 proline iminopeptidase [EC:3.4.11.5]                                                          | 1733   | 1695   | 1748   | 1711   | 930   | 972   | 885   | 975   | 570   | 524   | 558   | 501   |
| K01426 amidase [EC:3.5.1.4]                                                                          | 9167   | 9061   | 8492   | 8895   | 4978  | 4956  | 4644  | 5208  | 3233  | 3275  | 3176  | 3276  |
| K01470 creatinine amidohydrolase [EC:3.5.2.10]                                                       | 974    | 931    | 903    | 893    | 289   | 331   | 358   | 338   | 1348  | 1320  | 1252  | 1370  |
| K01473 N-methylhydantoinase A [EC:3.5.2.14]                                                          | 47     | 39     | 65     | 46     | 2     | 2     | 3     | 1     | 19    | 19    | 15    | 16    |
| K01474 N-methylhydantoinase B [EC:3.5.2.14]                                                          | 53     | 34     | 31     | 36     | 2     | 2     | 1     | 0     | 15    | 29    | 5     | 23    |
| K01480 agmatinase [EC:3.5.3.11]                                                                      | 847    | 956    | 885    | 946    | 538   | 692   | 580   | 530   | 1294  | 1352  | 1290  | 1334  |
| K01484 succinylarginine dihydrolase [EC:3.5.3.23]                                                    | 2102   | 2175   | 1935   | 2222   | 1077  | 1177  | 1082  | 1133  | 2202  | 2309  | 2288  | 2375  |
| K01581 ornithine decarboxylase [EC:4.1.1.17]                                                         | 2931   | 2878   | 2973   | 3051   | 2098  | 2211  | 2148  | 2164  | 2776  | 2756  | 2679  | 2860  |
| K01584 arginine decarboxylase [EC:4.1.1.19]                                                          | 3205   | 3099   | 3012   | 3142   | 1650  | 1642  | 1540  | 1617  | 1275  | 1131  | 1263  | 1244  |
| K01585 arginine decarboxylase [EC:4.1.1.19]                                                          | 6227   | 6173   | 6159   | 6006   | 7212  | 7223  | 7308  | 7277  | 6418  | 6347  | 6530  | 6231  |
| K01750 ornithine cyclodiaminase [EC:4.3.1.12]                                                        | 1342   | 1356   | 1182   | 1287   | 642   | 632   | 602   | 731   | 477   | 474   | 422   | 509   |
| K01777 proline racemase [EC:5.1.1.4]                                                                 | 66     | 71     | 80     | 66     | 84    | 90    | 93    | 109   | 111   | 106   | 112   | 1     |

|                                                                                                                                               |       |       |       |       |       |       |       |       |       |       |       |       |
|-----------------------------------------------------------------------------------------------------------------------------------------------|-------|-------|-------|-------|-------|-------|-------|-------|-------|-------|-------|-------|
| ko00340 Histidine metabolism                                                                                                                  | 60479 | 59535 | 59990 | 59197 | 62077 | 61787 | 62134 | 62424 | 52445 | 51474 | 51374 | 51745 |
| K00013 histidinol dehydrogenase [EC:1.1.1.23]                                                                                                 | 2886  | 2775  | 2704  | 2896  | 2688  | 2738  | 2759  | 2880  | 2762  | 2862  | 2734  | 2838  |
| K00603 glutamate formiminotransferase / 5-formyltetrahydrofolate cyclo-ligase [EC:2.1.2.5 6.3.3.2]                                            | 671   | 669   | 766   | 679   | 2041  | 2184  | 2185  | 2182  | 1583  | 1586  | 1581  | 1478  |
| K00765 ATP phosphoribosyltransferase [EC:2.4.2.17]                                                                                            | 2507  | 2343  | 2433  | 2365  | 2773  | 2844  | 2825  | 2874  | 2649  | 2733  | 2589  | 2667  |
| K00817 histidinol-phosphate aminotransferase [EC:2.6.1.6.9]                                                                                   | 7709  | 7663  | 7838  | 7675  | 8330  | 8147  | 8236  | 8130  | 6354  | 6206  | 6285  | 6231  |
| K01089 imidazoleglycerol-phosphate dehydratase / histidinol-phosphatase [EC:4.2.1.19 3.1.3.15]                                                | 1369  | 1390  | 1460  | 1370  | 2724  | 2527  | 2822  | 2592  | 2418  | 2451  | 2545  | 2539  |
| K01468 imidazolonepropionase [EC:3.5.2.7]                                                                                                     | 3878  | 3650  | 3709  | 3931  | 4276  | 4263  | 4403  | 4414  | 3847  | 3604  | 3650  | 3629  |
| K01479 formiminoglutamase [EC:3.5.3.8]                                                                                                        | 1815  | 1699  | 1721  | 1699  | 903   | 855   | 814   | 811   | 1166  | 1054  | 1114  | 1260  |
| K01496 phosphoribosyl-AMP cyclohydrolase [EC:3.5.4.19]                                                                                        | 723   | 760   | 748   | 719   | 408   | 394   | 457   | 428   | 294   | 270   | 241   | 325   |
| K01523 phosphoribosyl-ATP pyrophosphohydrolase [EC:3.6.1.31]                                                                                  | 598   | 593   | 565   | 579   | 343   | 336   | 334   | 403   | 232   | 244   | 201   | 214   |
| K01590 histidine decarboxylase [EC:4.1.1.22]                                                                                                  | 12    | 5     | 0     | 2     | 3     | 2     | 3     | 0     | 17    | 17    | 13    | 12    |
| K01663 imidazole glycerol-phosphate synthase [EC:4.3.2.10]                                                                                    | 0     | 0     | 1     | 0     | 0     | 0     | 0     | 0     | 0     | 0     | 0     | 0     |
| K01693 imidazoleglycerol-phosphate dehydratase [EC:4.2.1.19]                                                                                  | 1305  | 1271  | 1255  | 1142  | 681   | 631   | 662   | 735   | 615   | 617   | 555   | 619   |
| K01712 urocanate hydratase [EC:4.2.1.49]                                                                                                      | 5722  | 5474  | 5473  | 5440  | 6589  | 6727  | 6833  | 6551  | 5795  | 5866  | 5642  | 5721  |
| K01745 histidine ammonia-lyase [EC:4.3.1.3]                                                                                                   | 8324  | 8421  | 8336  | 8264  | 9886  | 9874  | 9767  | 9966  | 8177  | 7973  | 8036  | 8016  |
| K01814 phosphoribosylformimino-5-aminoimidazole carboxamide ribotide isomerase [EC:5.3.1.16]                                                  | 2363  | 2406  | 2548  | 2385  | 2522  | 2483  | 2418  | 2545  | 2494  | 2317  | 2438  | 2459  |
| K02500 imidazole glycerol-phosphate synthase subunit HisF [EC:4.3.2.10]                                                                       | 3360  | 3295  | 3402  | 3348  | 3250  | 3334  | 3384  | 3172  | 2792  | 2729  | 2798  | 2790  |
| K02501 imidazole glycerol-phosphate synthase subunit HisH [EC:4.3.2.10]                                                                       | 2696  | 2584  | 2685  | 2615  | 2605  | 2544  | 2557  | 2564  | 2305  | 2162  | 2172  | 2305  |
| K02502 ATP phosphoribosyltransferase regulatory subunit                                                                                       | 1479  | 1342  | 1329  | 1282  | 698   | 649   | 613   | 686   | 740   | 829   | 793   | 784   |
| K04486 histidinol-phosphatase (PHP family) [EC:3.1.3.15]                                                                                      | 3182  | 3250  | 3462  | 3204  | 4102  | 4281  | 4268  | 4165  | 3607  | 3425  | 3470  | 3391  |
| K05602 histidinol-phosphatase [EC:3.1.3.15]                                                                                                   | 0     | 0     | 0     | 1     | 0     | 0     | 0     | 0     | 0     | 0     | 0     | 1     |
| K05603 formimidoylglutamate deiminase [EC:3.5.3.13]                                                                                           | 691   | 671   | 572   | 655   | 591   | 583   | 542   | 611   | 102   | 132   | 123   | 112   |
| K11755 phosphoribosyl-ATP pyrophosphohydrolase / phosphoribosyl-AMP cyclohydrolase [EC:3.6.1.31 3.5.4.19]                                     | 1087  | 1062  | 1086  | 1079  | 1699  | 1681  | 1701  | 1658  | 1595  | 1669  | 1775  | 1661  |
| K13990 glutamate formiminotransferase / formiminotetrahydrofolate cyclodeaminase [EC:2.1.2.5 4.3.1.4]                                         | 5     | 2     | 3     | 2     | 7     | 9     | 10    | 12    | 0     | 1     | 3     | 2     |
| K14152 phosphoribosyl-ATP pyrophosphohydrolase / phosphoribosyl-AMP cyclohydrolase / histidinol dehydrogenase [EC:3.6.1.31 3.5.4.19 1.1.1.23] | 0     | 0     | 0     | 0     | 0     | 0     | 0     | 1     | 0     | 0     | 0     | 0     |
| K17363 uracinate reductase [EC:1.3.99.33]                                                                                                     | 12    | 21    | 19    | 22    | 22    | 17    | 25    | 19    | 32    | 43    | 46    | 42    |
| ko00350 Tyrosine metabolism                                                                                                                   | 63187 | 61811 | 60724 | 62184 | 42265 | 41713 | 40887 | 42573 | 46100 | 46102 | 45123 | 46338 |
| K00055 aryl-alcohol dehydrogenase [EC:1.1.1.90]                                                                                               | 406   | 379   | 402   | 465   | 104   | 135   | 95    | 139   | 881   | 891   | 833   | 844   |
| K00151 5-carboxymethyl-2-hydroxymuconic semialdehyde dehydrogenase [EC:1.2.1.60]                                                              | 2534  | 2420  | 2364  | 2407  | 1194  | 1183  | 1010  | 1175  | 1775  | 1746  | 1655  | 1830  |
| K00450 gentisate 1,2-dioxygenase [EC:1.13.11.4]                                                                                               | 1483  | 1452  | 1354  | 1397  | 726   | 707   | 746   | 830   | 472   | 464   | 416   | 396   |
| K00451 homogentisate 1,2-dioxygenase [EC:1.13.11.5]                                                                                           | 393   | 434   | 343   | 340   | 189   | 174   | 192   | 215   | 136   | 125   | 109   | 134   |
| K00455 3,4-dihydroxyphenylacetate 2,3-dioxygenase [EC:1.13.11.15]                                                                             | 1658  | 1562  | 1439  | 1461  | 765   | 724   | 742   | 793   | 1088  | 1163  | 1061  | 1141  |
| K00457 4-hydroxyphenylpyruvate dioxygenase [EC:1.13.11.27]                                                                                    | 5276  | 5060  | 4895  | 4938  | 2674  | 2608  | 2324  | 2809  | 2760  | 2716  | 2748  | 2897  |
| K00483 4-hydroxyphenylacetate 3-monooxygenase [EC:1.14.14.9]                                                                                  | 3388  | 3198  | 3008  | 3277  | 1796  | 1609  | 1542  | 1705  | 2360  | 2156  | 1982  | 2181  |
| K00484 flavin reductase (NADH) [EC:1.5.1.36]                                                                                                  | 584   | 571   | 486   | 500   | 234   | 242   | 273   | 281   | 515   | 534   | 479   | 541   |
| K01555 fumarylacetoacetase [EC:3.7.1.2]                                                                                                       | 1681  | 1512  | 1501  | 1683  | 902   | 848   | 762   | 854   | 524   | 449   | 449   | 457   |
| K01557 acylpyruvate hydrolase [EC:3.7.1.5]                                                                                                    | 1     | 0     | 0     | 0     | 0     | 0     | 0     | 0     | 0     | 0     | 0     | 0     |
| K01593 aromatic-L-amino-acid/L-tryptophan decarboxylase [EC:4.1.1.28 4.1.1.105]                                                               | 0     | 1     | 0     | 0     | 0     | 0     | 0     | 0     | 0     | 0     | 0     | 0     |
| K01668 tyrosine phenol-lyase [EC:4.1.99.2]                                                                                                    | 306   | 280   | 273   | 283   | 359   | 405   | 407   | 360   | 13    | 14    | 5     | 8     |
| K01800 maleylacetoacetate isomerase [EC:5.2.1.2]                                                                                              | 1700  | 1716  | 1539  | 1668  | 919   | 833   | 803   | 929   | 556   | 464   | 459   | 513   |
| K01826 5-carboxymethyl-2-hydroxymuconate isomerase [EC:5.3.3.10]                                                                              | 1071  | 1058  | 949   | 1044  | 495   | 546   | 491   | 537   | 587   | 609   | 574   | 636   |
| K02509 2-oxo-hept-3-ene-1,7-dioate hydratase [EC:4.2.1.-]                                                                                     | 1270  | 1620  | 1518  | 1636  | 853   | 839   | 774   | 958   | 1117  | 1075  | 1054  | 1123  |
| K02510 4-hydroxy-2-oxoheptanedioate aldolase [EC:4.1.2.52]                                                                                    | 2182  | 2003  | 1932  | 2165  | 1061  | 1147  | 1103  | 1118  | 1196  | 1210  | 1194  | 1248  |
| K05025 2-oxohept-3-ene-1,2,5-tricarboxylate decarboxylase / 2-hydroxyhepta-2,4-diene-1,7-dioate isomerase [EC:4.1.1.68 5.3.3.-]               | 2889  | 2653  | 2638  | 2757  | 1384  | 1475  | 1328  | 1487  | 1862  | 1784  | 1707  | 1825  |
| K10219 2-hydroxy-4-carboxymuconate semialdehyde hemiacetal dehydrogenase [EC:1.1.1.312]                                                       | 8     | 5     | 7     | 11    | 0     | 0     | 0     | 0     | 4     | 6     | 4     | 4     |
| K16165 fumarylpyruvate hydrolase [EC:3.7.1.20]                                                                                                | 150   | 140   | 146   | 142   | 111   | 89    | 110   | 116   | 64    | 67    | 80    | 76    |
| K16901 anthranilate 3-monooxygenase (FAD) / 4-hydroxyphenylacetate 3-monooxygenase [EC:1.14.14.8 1.14.14.9]                                   | 1     | 0     | 0     | 0     | 0     | 0     | 0     | 2     | 0     | 0     | 0     | 0     |
| K22330 tyrosine decarboxylase [EC:4.1.1.25]                                                                                                   | 97    | 104   | 100   | 124   | 38    | 35    | 28    | 30    | 107   | 159   | 119   | 133   |
| K23109 aromatic 2-oxoacid reductase [EC:1.1.1.110]                                                                                            | 3     | 5     | 12    | 9     | 3     | 3     | 2     | 0     | 16    | 20    | 14    | 18    |
| ko00360 Phenylalanine metabolism                                                                                                              | 67599 | 67361 | 65044 | 66281 | 47773 | 47165 | 46342 | 48668 | 56908 | 57652 | 56287 | 58293 |
| K00146 phenylacetaldehyde dehydrogenase [EC:1.2.1.39]                                                                                         | 3074  | 3228  | 2751  | 2991  | 1383  | 1316  | 1355  | 1467  | 2754  | 2743  | 2608  | 2749  |
| K00285 D-amino-acid dehydrogenase [EC:1.4.5.1]                                                                                                | 5374  | 5202  | 5358  | 5270  | 3033  | 2959  | 2812  | 3147  | 3184  | 3145  | 3203  | 3362  |
| K00500 phenylalanine-4-hydroxylase [EC:1.14.16.1]                                                                                             | 1235  | 1169  | 1118  | 1207  | 678   | 690   | 622   | 661   | 367   | 382   | 315   | 350   |
| K01451 hippurate hydrolase [EC:3.5.1.32]                                                                                                      | 4297  | 4273  | 4089  | 4137  | 2111  | 1923  | 1897  | 2168  | 2794  | 2838  | 2619  | 2805  |
| K01666 4-hydroxy 2-oxovalerate aldolase [EC:4.1.3.39]                                                                                         | 424   | 414   | 433   | 447   | 96    | 102   | 116   | 85    | 812   | 819   | 761   | 789   |
| K01912 phenylacetate-CoA ligase [EC:6.2.1.30]                                                                                                 | 2593  | 2821  | 2790  | 2674  | 5548  | 5595  | 5892  | 5643  | 4880  | 4983  | 4988  | 5098  |
| K02554 2-keto-4-pentenoate hydratase [EC:4.2.1.80]                                                                                            | 413   | 442   | 449   | 407   | 324   | 419   | 357   | 333   | 583   | 580   | 637   | 651   |
| K02609 ring-1,2-phenylacetyl-CoA epoxidase subunit PaaA [EC:1.14.13.149]                                                                      | 388   | 358   | 346   | 401   | 95    | 79    | 94    | 109   | 744   | 692   | 696   | 750   |
| K02610 ring-1,2-phenylacetyl-CoA epoxidase subunit PaaB [EC:1.14.12.19]                                                                       | 128   | 119   | 100   | 103   | 46    | 26    | 29    | 39    | 223   | 216   | 216   | 217   |
| K02611 ring-1,2-phenylacetyl-CoA epoxidase subunit PaaC [EC:1.14.13.149]                                                                      | 270   | 274   | 276   | 307   | 86    | 66    | 87    | 51    | 585   | 558   | 657   | 653   |
| K02612 ring-1,2-phenylacetyl-CoA epoxidase subunit PaaD [EC:1.14.13.149]                                                                      | 174   | 190   | 195   | 191   | 43    | 52    | 53    | 54    | 322   | 421   | 430   | 413   |
| K02613 ring-1,2-phenylacetyl-CoA epoxidase subunit PaaE [EC:1.14.13.149]                                                                      | 310   | 428   | 410   | 390   | 101   | 99    | 113   | 102   | 726   | 826   | 860   | 895   |
| K02614 acyl-CoA thioesterase [EC:3.1.2.-]                                                                                                     | 1143  | 1167  | 1155  | 1101  | 1313  | 1300  | 1305  | 1427  | 1301  | 1313  | 1249  | 1267  |
| K02615 3-oxo-5,6-didehydrosuberyl-CoA 3-oxoadipyl-CoA thiolase [EC:2.3.1.223 2.3.1.174]                                                       | 430   | 473   | 382   | 441   | 134   | 106   | 114   | 133   | 885   | 900   | 899   | 923   |
| K02618 oxepin-CoA hydrolase / 3-oxo-5,6-dehydrosuberyl-CoA semialdehyde dehydrogenase [EC:3.3.2.12 1.2.1.91]                                  | 671   | 634   | 647   | 693   | 194   | 211   | 207   | 184   | 1352  | 1424  | 1402  | 1494  |
| K03782 catalase-peroxidase [EC:1.11.1.21]                                                                                                     | 1258  | 1181  | 1142  | 1263  | 789   | 896   | 772   | 806   | 1641  | 1801  | 1708  | 1710  |
| K05708 3-phenylpropionate/trans-cinnamate dioxygenase subunit alpha [EC:1.14.12.19]                                                           | 0     | 0     | 0     | 0     | 11    | 3     | 8     | 4     | 4     | 1     | 3     | 1     |
| K05709 3-phenylpropionate/trans-cinnamate dioxygenase subunit beta [EC:1.14.12.19]                                                            | 0     | 0     | 0     | 0     | 2     | 2     | 3     | 3     | 0     | 1     | 1     | 1     |
| K05710 3-phenylpropionate/trans-cinnamate dioxygenase ferredoxin component                                                                    | 0     | 1     | 0     | 0     | 3     | 4     | 4     | 3     | 1     | 0     | 2     | 4     |
| K05711 2,3-dihydroxy-2,3-dihydrophenylpropionate dehydrogenase [EC:1.3.1.87]                                                                  | 0     | 0     | 0     | 0     | 10    | 10    | 4     | 5     | 4     | 2     | 6     | 2     |
| K05712 3-(3-hydroxy-phenyl)propionate hydroxylase [EC:1.14.13.127]                                                                            | 601   | 533   | 477   | 546   | 157   | 190   | 148   | 178   | 1041  | 1126  | 1068  | 1154  |
| K05713 2,3-dihydroxyphenylpropionate 1,2-dioxygenase [EC:1.13.11.16]                                                                          | 352   | 356   | 276   | 304   | 101   | 81    | 98    | 84    | 683   | 757   | 658   | 745   |
| K05714 2-hydroxy-6-oxonona-2,4-dienedioate hydrolase [EC:3.7.1.14]                                                                            | 283   | 293   | 266   | 314   | 98    | 81    | 84    | 100   | 648   | 690   | 614   | 702   |
| K10797 2-enoate reductase [EC:1.3.1.31]                                                                                                       | 1240  | 1260  | 1193  | 1190  | 199   | 187   | 213   | 189   | 1244  | 1330  | 1248  | 1369  |
| K15866 2-(1,2-epoxy-1,2-dihydrophenyl)acetyl-CoA isomerase [EC:5.3.3.18]                                                                      | 1225  | 1220  | 1112  | 1080  | 588   | 529   | 521   | 643   | 866   | 851   | 866   | 872   |
| K18356 phenylglyoxylate dehydrogenase beta subunit [EC:1.2.1.58]                                                                              | 1     | 2     | 0     | 0     | 0     | 0     | 0     | 0     | 5     | 3     | 7     | 13    |
| ko00380 Tryptophan metabolism                                                                                                                 | 67727 | 67568 | 65289 | 66793 | 46993 | 46039 | 45017 | 47573 | 42448 | 41918 | 41277 | 42338 |
| K00452 3-hydroxyanthranilate 3,4-dioxygenase [EC:1.13.11.6]                                                                                   | 1     | 0     | 0     | 0     | 0     | 0     | 2     | 0     | 0     | 0     | 0     | 1     |
| K00453 tryptophan 2,3-dioxygenase [EC:1.13.11.11]                                                                                             | 1198  | 1272  | 1328  | 1245  | 689   | 730   | 729   | 786   | 355   | 366   | 356   | 383   |
| K01556 kynureninase [EC:3.7.1.3]                                                                                                              | 450   | 470   | 445   | 444   | 238   | 240   | 210   | 217   | 133   | 163   | 127   | 138   |
| K01667 tryptophanase [EC:4.1.99.1]                                                                                                            | 992   | 1068  | 1125  | 1117  | 3054  | 2955  | 3140  | 3031  | 1964  | 1901  | 2035  | 1842  |
| K03392 aminocarboxymuconate-semialdehyde decarboxylase [EC:4.1.1.45]                                                                          | 14    | 9     | 16    | 22    | 3     | 0     | 2     | 2     | 4     | 0     | 3     | 9     |
| K04103 indolepyruvate decarboxylase [EC:4.1.1.74]                                                                                             | 693   | 702   | 727   | 670   | 203   | 190   | 229   | 198   | 1443  | 1568  | 1374  | 1535  |
| K01017 aminomuconate-semialdehyde/2-hydroxymuconate-6-semialdehyde dehydrogenase [EC:1.2.1.32 1.2.1.85]                                       | 1     | 0     | 0     | 0     | 0     | 0     | 0     | 0     | 0     | 0     | 0     | 0     |
| K14264 kynurenine aminotransferase [EC:2.6.1.7]                                                                                               | 0     | 0     | 0     | 0     | 0     | 0     | 0     | 1     | 0     | 0     | 0     | 0     |
| K20807 nitrile hydratase subunit beta [EC:4.2.1.84]                                                                                           | 0     | 0     | 0     | 0     | 0     | 0     | 0     | 0     | 1     | 0     | 0     | 0     |
| K21801 indoleacetamide hydrolase [EC:3.5.1.-]                                                                                                 | 1     | 0     | 0     | 0     | 0     | 0     | 0     | 0     | 0     | 0     | 0     | 0     |
| K23384 indoleacetate decarboxylase [EC:4.1.1.115]                                                                                             | 6     | 6     | 7     | 9     | 0     | 0     | 0     | 0     | 0     | 2     | 1     | 0     |
| ko00400 Phenylalanine, tyrosine and tryptophan biosynthesis                                                                                   | 82297 | 82245 | 82864 | 82360 | 80409 | 79695 | 80181 | 79849 | 78406 | 78029 | 77696 | 78041 |
| K00014 shikimate dehydrogenase [EC:1.1.1.25]                                                                                                  | 4001  | 3925  | 4135  | 4063  | 3512  | 3324  | 3485  | 3433  | 4683  | 4655  | 4415  | 4703  |
| K00210 prephenate dehydrogenase [EC:1.3.1.12]                                                                                                 | 484   | 593   | 611   | 550   | 1720  | 1747  | 1773  | 1642  | 1302  | 1179  | 1     |       |

|                                                                                                        |        |        |        |        |        |        |        |        |        |        |        |        |
|--------------------------------------------------------------------------------------------------------|--------|--------|--------|--------|--------|--------|--------|--------|--------|--------|--------|--------|
| K13829 shikimate kinase / 3-dehydroquinase synthase [EC:2.7.1.71 4.2.3.4]                              | 10     | 15     | 8      | 15     | 26     | 14     | 21     | 19     | 25     | 25     | 24     | 32     |
| K13832 3-dehydroquinase dehydratase / shikimate dehydrogenase [EC:4.2.1.10 1.1.1.25]                   | 0      | 2      | 2      | 1      | 2      | 2      | 3      | 0      | 1      | 0      | 0      | 1      |
| K13853 3-deoxy-7-phosphoheptulonate synthase / chorismate mutase [EC:2.5.1.54 5.4.99.5]                | 0      | 0      | 2      | 2      | 0      | 0      | 1      | 0      | 0      | 1      | 2      | 1      |
| K14170 chorismate mutase / prephenate dehydratase [EC:5.4.99.5 4.2.1.11]                               | 3001   | 2781   | 2992   | 2825   | 1598   | 1754   | 1517   | 1626   | 2205   | 2038   | 2000   | 2037   |
| K14187 chorismate mutase / prephenate dehydrogenase [EC:5.4.99.5 1.3.1.12]                             | 772    | 691    | 649    | 743    | 487    | 568    | 544    | 502    | 964    | 996    | 968    | 1025   |
| K15652 3-dehydroshikimate dehydratase [EC:4.2.1.118]                                                   | 0      | 0      | 1      | 0      | 1      | 0      | 0      | 0      | 0      | 0      | 0      | 0      |
| K17749 3-benzylmalate isomerase [EC:4.2.1.-]                                                           | 1      | 0      | 0      | 0      | 0      | 0      | 0      | 0      | 0      | 0      | 0      | 0      |
| K17750 3-benzylmalate dehydrogenase [EC:1.1.1.-]                                                       | 0      | 0      | 0      | 0      | 0      | 0      | 0      | 0      | 0      | 1      | 0      | 0      |
| Metabolism of other amino acids                                                                        | 285297 | 284883 | 280899 | 284452 | 282267 | 283029 | 281654 | 282129 | 282463 | 280216 | 279210 | 280375 |
| ko00410 beta-Alanine metabolism                                                                        | 54483  | 53513  | 52036  | 52952  | 36094  | 34911  | 33537  | 35631  | 33584  | 33314  | 32046  | 33284  |
| K01579 aspartate 1-decarboxylase [EC:4.1.1.11]                                                         | 968    | 1037   | 1032   | 990    | 1278   | 1240   | 1193   | 1165   | 1013   | 1069   | 1076   | 1027   |
| K01918 pantoate--beta-alanine ligase [EC:6.3.2.1]                                                      | 2715   | 2495   | 2689   | 2623   | 3123   | 3153   | 3021   | 3109   | 2737   | 2592   | 2593   | 2551   |
| K09722 4-phosphopantoate--beta-alanine ligase [EC:6.3.2.36]                                            | 1      | 0      | 0      | 1      | 1      | 0      | 0      | 0      | 2      | 2      | 2      | 3      |
| K15372 taurine--2-oxoglutarate transaminase [EC:2.6.1.15]                                              | 852    | 915    | 766    | 875    | 512    | 591    | 496    | 535    | 1206   | 1209   | 1140   | 1340   |
| ko00430 Taurine and hypotaurine metabolism                                                             | 30793  | 30662  | 29791  | 30251  | 25650  | 25797  | 25113  | 26040  | 23162  | 22413  | 22532  | 23041  |
| K00681 gamma-glutamyltranspeptidase / glutathione hydrolase [EC:2.3.2.3 4.19.13]                       | 9341   | 8938   | 8847   | 9001   | 5414   | 5263   | 5126   | 5548   | 4207   | 4148   | 4127   | 4293   |
| K03851 taurine-pyruvate aminotransferase [EC:2.6.1.77]                                                 | 10     | 6      | 16     | 9      | 3      | 5      | 0      | 2      | 10     | 7      | 4      | 4      |
| K03852 sulfoacetaldehyde acetyltransferase [EC:2.3.3.15]                                               | 8      | 18     | 6      | 7      | 7      | 5      | 2      | 6      | 23     | 20     | 20     | 39     |
| K15373 sulfoacetaldehyde reductase [EC:1.1.1.313]                                                      | 497    | 507    | 468    | 509    | 281    | 313    | 344    | 323    | 643    | 627    | 611    | 763    |
| ko00440 Phosphonate and phosphinate metabolism                                                         | 17247  | 17191  | 16246  | 16839  | 10181  | 9988   | 9611   | 10350  | 14425  | 14444  | 13863  | 14440  |
| K01841 phosphoenolpyruvate phosphomutase [EC:5.4.2.9]                                                  | 132    | 132    | 142    | 146    | 74     | 64     | 66     | 63     | 83     | 85     | 108    | 71     |
| K03430 2-aminoethylphosphonate-pyruvate transaminase [EC:2.6.1.37]                                     | 2348   | 2353   | 2331   | 2360   | 1232   | 1341   | 1253   | 1410   | 1969   | 2037   | 1902   | 1914   |
| K03823 phosphothricin acetyltransferase [EC:2.3.1.183]                                                 | 2141   | 2223   | 2057   | 2159   | 1490   | 1407   | 1447   | 1485   | 1689   | 1680   | 1599   | 1732   |
| K05306 phosphoacetaldehyde hydrolase [EC:3.11.1.1]                                                     | 1963   | 1815   | 1677   | 1838   | 1005   | 1000   | 1026   | 1046   | 1320   | 1424   | 1312   | 1387   |
| K05780 alpha-D-ribose 1-methylphosphonate 5-triphosphate synthase subunit PmL [EC:2.7.8.37]            | 1001   | 964    | 912    | 976    | 425    | 424    | 385    | 456    | 1000   | 962    | 919    | 1019   |
| K01612 alpha-D-ribose 1-methylphosphonate 5-triphosphate diphosphatase [EC:3.6.1.63]                   | 1845   | 1853   | 1663   | 1690   | 824    | 774    | 704    | 795    | 1543   | 1395   | 1414   | 1547   |
| K01613 alpha-D-ribose 1-methylphosphonate 5-phosphate C-P lyase [EC:4.7.1.1]                           | 1651   | 1657   | 1628   | 1612   | 786    | 811    | 741    | 844    | 1254   | 1251   | 1214   | 1243   |
| K01614 alpha-D-ribose 1-methylphosphonate 5-triphosphate synthase subunit PmH [EC:2.7.8.37]            | 1761   | 1656   | 1558   | 1683   | 822    | 723    | 665    | 923    | 1422   | 1451   | 1302   | 1410   |
| K01615 alpha-D-ribose 1-methylphosphonate 5-triphosphate synthase subunit PmH [EC:2.7.8.37]            | 1260   | 1315   | 1096   | 1263   | 589    | 523    | 511    | 602    | 898    | 891    | 788    | 858    |
| K01616 alpha-D-ribose 1-methylphosphonate 5-triphosphate synthase subunit PmG [EC:2.7.8.37]            | 963    | 900    | 835    | 889    | 488    | 372    | 421    | 398    | 706    | 692    | 695    | 688    |
| K01617 phosphoribosyl 1,2-cyclic phosphate phosphodiesterase [EC:3.1.4.55]                             | 2000   | 2144   | 2173   | 2030   | 2270   | 2357   | 2183   | 2149   | 2220   | 2221   | 2220   | 2209   |
| K09459 phosphonopyruvate decarboxylase [EC:4.1.1.82]                                                   | 72     | 66     | 50     | 64     | 35     | 30     | 41     | 27     | 109    | 107    | 124    | 122    |
| K09994 (aminoalkyl)phosphonate N-acetyltransferase [EC:2.3.1.280]                                      | 12     | 25     | 16     | 18     | 3      | 6      | 7      | 6      | 43     | 44     | 61     | 84     |
| K19670 phosphonoacetate hydrolase [EC:3.11.1.2]                                                        | 72     | 65     | 64     | 82     | 127    | 138    | 146    | 128    | 105    | 92     | 114    | 89     |
| K02059 phosphoribosyl 1,2-cyclic phosphate 1,2-diphosphodiesterase [EC:3.1.4.57]                       | 24     | 23     | 44     | 29     | 8      | 11     | 10     | 16     | 57     | 103    | 87     | 56     |
| ko00450 Selenocompound metabolism                                                                      | 49483  | 49507  | 49234  | 50116  | 48072  | 49879  | 48981  | 48250  | 55905  | 55802  | 55947  | 55855  |
| K00384 thioredoxin reductase (NADPH) [EC:1.8.1.9]                                                      | 5048   | 5103   | 5254   | 5193   | 4075   | 4326   | 4004   | 3898   | 5206   | 5283   | 5317   | 5310   |
| K01008 selenide, water dikinase [EC:2.7.9.3]                                                           | 2726   | 2788   | 2603   | 2646   | 1346   | 1332   | 1280   | 1444   | 1713   | 1789   | 1707   | 1815   |
| K01042 L-seryl-tRNA(Ser) seleniumtransferase [EC:2.9.1.1]                                              | 2558   | 2671   | 2455   | 2469   | 1542   | 1562   | 1633   | 1584   | 2588   | 2805   | 2590   | 2854   |
| K01874 methionyl-tRNA synthetase [EC:6.1.1.10]                                                         | 1412   | 6714   | 6299   | 6516   | 7488   | 7743   | 7705   | 7311   | 7785   | 7475   | 7715   | 7530   |
| K07309 Tat-targeted selenate reductase subunit YnfE [EC:1.97.1.9]                                      | 6255   | 1258   | 1157   | 1358   | 893    | 967    | 820    | 875    | 1950   | 1859   | 1894   | 1844   |
| K07310 Tat-targeted selenate reductase subunit YnfF [EC:1.97.1.9]                                      | 17     | 11     | 11     | 8      | 34     | 39     | 29     | 33     | 114    | 144    | 137    | 114    |
| K11717 cysteine desulfurase / selenocysteine lyase [EC:2.8.1.7 4.4.1.16]                               | 1734   | 1738   | 1834   | 1809   | 3381   | 3485   | 3574   | 3359   | 3340   | 3274   | 3425   | 3363   |
| K12527 putative selenate reductase [EC:1.97.1.9]                                                       | 1310   | 1273   | 1237   | 1279   | 392    | 470    | 448    | 416    | 1301   | 1482   | 1357   | 1434   |
| K12528 putative selenate reductase molybdopterin-binding subunit                                       | 16     | 10     | 17     | 6      | 38     | 34     | 44     | 33     | 173    | 170    | 187    | 189    |
| K12529 putative selenate reductase FAD-binding subunit                                                 | 0      | 1      | 0      | 1      | 9      | 6      | 11     | 10     | 43     | 41     | 37     | 58     |
| ko00460 Cyanoamino acid metabolism                                                                     | 54789  | 55753  | 56554  | 55832  | 93081  | 91752  | 94310  | 92020  | 83690  | 82659  | 84193  | 81963  |
| K10814 hydrogen cyanide synthase HcnA [EC:1.4.99.5]                                                    | 397    | 408    | 399    | 379    | 236    | 188    | 190    | 240    | 150    | 137    | 112    | 102    |
| K10815 hydrogen cyanide synthase HcnB [EC:1.4.99.5]                                                    | 652    | 653    | 577    | 703    | 333    | 293    | 316    | 354    | 190    | 155    | 193    | 197    |
| K10816 hydrogen cyanide synthase HcnC [EC:1.4.99.5]                                                    | 1731   | 1712   | 1501   | 1742   | 869    | 850    | 793    | 913    | 489    | 493    | 486    | 471    |
| K18282 cyanide dihydratase [EC:3.5.5.-]                                                                | 0      | 0      | 0      | 0      | 0      | 0      | 0      | 1      | 0      | 0      | 0      | 0      |
| ko00471 D-Glutamine and D-glutamate metabolism                                                         | 15224  | 15081  | 14944  | 15213  | 16826  | 17335  | 17417  | 17037  | 17085  | 16882  | 17014  | 17054  |
| K01776 glutamate racemase [EC:5.1.1.3]                                                                 | 2921   | 2983   | 2975   | 3007   | 3151   | 3357   | 3239   | 3144   | 3002   | 3005   | 3000   | 2980   |
| K01924 UDP-N-acetylmuramate--alanine ligase [EC:6.3.2.8]                                               | 5304   | 5105   | 5096   | 5223   | 5477   | 5627   | 5569   | 5659   | 5370   | 5179   | 5158   | 5376   |
| K01925 UDP-N-acetylmuramoylalanine--D-glutamate ligase [EC:6.3.2.9]                                    | 4613   | 4697   | 4526   | 4574   | 5196   | 5177   | 5211   | 5184   | 4866   | 4958   | 4854   | 4875   |
| K22210 D-glutamate cyclase [EC:4.2.1.48]                                                               | 1      | 0      | 0      | 1      | 0      | 0      | 0      | 0      | 0      | 0      | 0      | 1      |
| K23169 UDP-N-acetylmuramoyl-L-alanine--L-glutamate ligase [EC:6.3.2.53]                                | 75     | 73     | 68     | 64     | 8      | 19     | 15     | 23     | 37     | 52     | 40     | 44     |
| K23170 UDP-N-acetyl-alpha-D-muramoyl-L-alanyl-L-glutamate epimerase [EC:5.1.1.23]                      | 58     | 80     | 66     | 62     | 18     | 29     | 13     | 14     | 48     | 38     | 34     | 35     |
| ko00472 D-Arginine and D-Ornithine metabolism                                                          | 4026   | 4096   | 3930   | 3926   | 2283   | 2259   | 2158   | 2272   | 1573   | 1428   | 1390   | 1514   |
| K17898 D-ornithine 4,5-aminomutase subunit beta [EC:4.3.4.5]                                           | 1      | 1      | 0      | 1      | 0      | 0      | 2      | 3      | 1      | 4      | 5      | 3      |
| K17899 D-ornithine 4,5-aminomutase subunit alpha [EC:4.3.4.5]                                          | 3      | 3      | 0      | 0      | 0      | 0      | 2      | 0      | 0      | 0      | 0      | 0      |
| K19744 L-arginine dehydrogenase [EC:1.4.1.25]                                                          | 1557   | 1525   | 1412   | 1442   | 918    | 860    | 777    | 839    | 478    | 449    | 421    | 452    |
| K19746 D-arginine dehydrogenase [EC:1.4.99.6]                                                          | 1785   | 1847   | 1822   | 1796   | 996    | 968    | 983    | 1063   | 689    | 529    | 547    | 592    |
| K21898 ornithine racemase [EC:5.1.1.12]                                                                | 19     | 45     | 41     | 31     | 40     | 57     | 29     | 37     | 27     | 25     | 44     | 52     |
| ko00473 D-Alanine metabolism                                                                           | 11584  | 11376  | 11284  | 11249  | 12835  | 12757  | 12829  | 12622  | 12103  | 12115  | 11999  | 11890  |
| K01775 alanine racemase [EC:5.1.1.1]                                                                   | 5618   | 5449   | 5415   | 5381   | 7500   | 7409   | 7367   | 7298   | 6646   | 6678   | 6636   | 6487   |
| K01921 D-alanine-D-alanine ligase [EC:6.3.2.4]                                                         | 5117   | 5141   | 5072   | 5038   | 4567   | 4518   | 4615   | 4569   | 5003   | 5021   | 4923   | 4991   |
| K03367 D-alanine--poly(phosphoribitol) ligase subunit 1 [EC:6.1.1.13]                                  | 469    | 453    | 456    | 482    | 466    | 463    | 498    | 443    | 268    | 260    | 267    | 241    |
| K14188 D-alanine--poly(phosphoribitol) ligase subunit 2 [EC:6.1.1.13]                                  | 77     | 70     | 70     | 82     | 59     | 81     | 82     | 79     | 53     | 33     | 57     | 44     |
| ko00480 Glutathione metabolism                                                                         | 72117  | 71420  | 70079  | 71801  | 54876  | 55182  | 53923  | 55239  | 55062  | 55030  | 54029  | 55526  |
| K00383 glutathione reductase (NADPH) [EC:1.8.1.7]                                                      | 2927   | 2810   | 2641   | 2678   | 1547   | 1643   | 1704   | 1649   | 1776   | 1850   | 1640   | 1831   |
| K00799 glutathione S-transferase [EC:2.5.1.18]                                                         | 8066   | 7801   | 7767   | 8129   | 4589   | 4538   | 4351   | 4600   | 5020   | 4797   | 4675   | 4936   |
| K01255 leucyl aminopeptidase [EC:3.4.11.1]                                                             | 3148   | 3053   | 2887   | 3141   | 1693   | 1832   | 1609   | 1785   | 2297   | 2556   | 2342   | 2495   |
| K01256 aminopeptidase N [EC:3.4.11.2]                                                                  | 5582   | 5558   | 5449   | 5600   | 3753   | 3630   | 3708   | 3565   | 3451   | 3498   | 3494   | 3525   |
| K01270 dipeptidase D [EC:4.13.-]                                                                       | 3016   | 3181   | 3164   | 3080   | 6994   | 7072   | 7013   | 6803   | 6070   | 6048   | 5922   | 6206   |
| K01460 glutathionylspermidine amidase/synthetase [EC:3.5.1.78 6.3.1.8]                                 | 664    | 693    | 768    | 780    | 250    | 183    | 231    | 200    | 1538   | 1638   | 1592   | 1483   |
| K01469 5-oxoprolinase (ATP-hydrolysing) [EC:3.5.2.9]                                                   | 2      | 2      | 2      | 3      | 0      | 5      | 3      | 0      | 4      | 10     | 4      | 8      |
| K06048 glutamate--cysteine ligase / carboxylate-amine ligase [EC:6.3.2.2 6.3.-]                        | 2188   | 2244   | 2138   | 2295   | 1250   | 1269   | 1182   | 1253   | 1345   | 1489   | 1400   | 1502   |
| K07160 5-oxoprolinase (ATP-hydrolysing) subunit A [EC:3.5.2.9]                                         | 3965   | 4053   | 3697   | 3950   | 2222   | 2221   | 2098   | 2406   | 1956   | 1786   | 1667   | 1790   |
| K07232 glutathione-specific gamma-glutamylcyclotransferase [EC:4.3.2.7]                                | 366    | 390    | 365    | 427    | 289    | 320    | 260    | 252    | 503    | 529    | 532    | 539    |
| K07751 PepB aminopeptidase [EC:3.4.11.23]                                                              | 867    | 819    | 775    | 760    | 482    | 577    | 542    | 548    | 1031   | 1114   | 1060   | 1178   |
| K15428 Cys-Gly metallo-dipeptidase DUG1 [EC:3.4.13.-]                                                  | 2      | 2      | 2      | 0      | 0      | 0      | 0      | 0      | 0      | 0      | 0      | 0      |
| K23123 5-oxoprolinase (ATP-hydrolysing) subunit B [EC:3.5.2.9]                                         | 355    | 358    | 351    | 363    | 278    | 288    | 294    | 269    | 408    | 444    | 461    | 485    |
| K23124 5-oxoprolinase (ATP-hydrolysing) subunit C [EC:3.5.2.9]                                         | 489    | 562    | 520    | 477    | 385    | 405    | 391    | 362    | 702    | 711    | 731    | 670    |
| Glycan biosynthesis and metabolism                                                                     | 241570 | 246088 | 250980 | 246569 | 364846 | 367201 | 367403 | 366665 | 333664 | 329566 | 333903 | 329667 |
| ko00510 N-Glycan biosynthesis                                                                          | 791    | 837    | 897    | 859    | 1733   | 1750   | 1884   | 1744   | 1186   | 1137   | 1310   | 1226   |
| K00721 dolichol-phosphate mannosyltransferase [EC:2.4.1.83]                                            | 763    | 807    | 855    | 829    | 1728   | 1742   | 1879   | 1741   | 1150   | 1063   | 1255   | 1170   |
| K00737 beta-1,4-mannosyl-glycoprotein beta-1,4-N-acetylglucosaminyltransferase [EC:2.4.1.144]          | 8      | 9      | 13     | 9      | 0      | 4      | 1      | 1      | 13     | 15     | 10     | 12     |
| K01001 UDP-N-acetylglucosamine--dolichyl-phosphate N-acetylglucosaminophosphotransferase [EC:2.7.8.15] | 0      | 0      | 2      | 0      | 2      | 0      | 0      | 1      | 4      | 11     | 5      | 0      |
| K07151 dolichyl-diphosphooligosaccharide--protein glycosyltransferase [EC:2.4.99.18]                   | 20     | 21     | 27     | 21     | 3      | 4      | 4      | 1      | 19     | 48     | 40     | 37     |
| ko00513 Various types of N-glycan biosynthesis                                                         | 12253  | 13647  | 14863  | 13737  | 42752  | 42817  | 43878  | 42788  | 31402  | 30085  | 31721  | 30060  |
| ko00515 Mannose type O-glycan biosynthesis                                                             | 53     | 56     | 40     | 57     | 46     | 51     | 59     |        |        |        |        |        |

|                                                                                                                                                     |        |        |        |        |        |        |        |        |        |        |        |        |
|-----------------------------------------------------------------------------------------------------------------------------------------------------|--------|--------|--------|--------|--------|--------|--------|--------|--------|--------|--------|--------|
| K02840 UDP-D-galactose:[glucosyl]LPS alpha-1,6-D-galactosyltransferase [EC:2.4.1.-]                                                                 | 0      | 1      | 2      | 0      | 2      | 1      | 3      | 5      | 1      | 2      | 8      | 2      |
| K02841 heptosyltransferase I [EC:2.4.-.]                                                                                                            | 1136   | 1156   | 1031   | 1117   | 787    | 813    | 819    | 709    | 1056   | 1108   | 1020   | 1084   |
| K02843 heptosyltransferase II [EC:2.4.-.]                                                                                                           | 1417   | 1459   | 1494   | 1453   | 2864   | 2763   | 2854   | 2843   | 2798   | 2936   | 3055   | 2937   |
| K02844 UDP-glucose:(heptosyl)LPS alpha-1,3-glucosyltransferase [EC:2.4.1.-]                                                                         | 2594   | 2631   | 2620   | 2715   | 1550   | 1600   | 1572   | 1548   | 1569   | 1694   | 1541   | 1768   |
| K02847 O-antigen ligase [EC:2.4.1.-]                                                                                                                | 3      | 3      | 6      | 3      | 11     | 20     | 22     | 13     | 93     | 79     | 95     | 76     |
| K02848 heptose I phosphotransferase [EC:2.7.1.-]                                                                                                    | 1272   | 1369   | 1271   | 1324   | 796    | 712    | 722    | 712    | 483    | 457    | 433    | 465    |
| K02849 heptosyltransferase III [EC:2.4.-.]                                                                                                          | 670    | 660    | 670    | 723    | 514    | 528    | 483    | 512    | 935    | 995    | 911    | 977    |
| K02850 heptose II phosphotransferase [EC:2.7.1.-]                                                                                                   | 3      | 5      | 2      | 0      | 9      | 8      | 15     | 7      | 30     | 30     | 29     | 46     |
| K03269 UDP-2,3-diacylgucosamine hydrolase [EC:3.6.1.54]                                                                                             | 1337   | 1451   | 1477   | 1400   | 2227   | 2327   | 2303   | 2302   | 2065   | 1922   | 2066   | 1982   |
| K03270 3-deoxy-D-manno-oxulosone 8-phosphate phosphatase (KDO 8-P phosphatase) [EC:3.1.3.45]                                                        | 1622   | 1568   | 1564   | 1644   | 1846   | 2004   | 1798   | 1865   | 1543   | 1647   | 1530   | 1508   |
| K03271 D-iodoheptulose 7-phosphate isomerase [EC:5.3.1.28]                                                                                          | 1990   | 2035   | 2006   | 2133   | 1773   | 1831   | 1810   | 1818   | 1959   | 1942   | 1886   | 1913   |
| K03272 D-beta-D-heptose 7-phosphate kinase / D-beta-D-heptose 1-phosphate adenosyltransferase [EC:2.7.1.167 2.7.7.70]                               | 3566   | 3596   | 3293   | 3507   | 2168   | 2069   | 1971   | 2076   | 2075   | 2174   | 2221   | 2334   |
| K03273 D-glycero-D-manno-heptose 1,7-bisphosphate phosphatase [EC:2.7.1.3.82 3.1.3.83]                                                              | 1994   | 1962   | 2018   | 1991   | 2343   | 2506   | 2489   | 2469   | 2153   | 2214   | 2190   | 2103   |
| K03274 ADP-L-glycero-D-manno-heptose 6-epimerase [EC:5.1.3.20]                                                                                      | 2039   | 1895   | 1910   | 1962   | 1281   | 1294   | 1168   | 1222   | 1447   | 1423   | 1403   | 1386   |
| K03275 UDP-glucose:[glucosyl]LPS alpha-1,3-glucosyltransferase [EC:2.4.1.-]                                                                         | 4      | 4      | 5      | 9      | 16     | 9      | 18     | 8      | 51     | 38     | 56     | 51     |
| K03276 UDP-glucose/galactose:[glucosyl]LPS alpha-1,2-glucosyl/galactosyltransferase [EC:2.4.1.-]                                                    | 10     | 9      | 13     | 14     | 50     | 38     | 36     | 23     | 98     | 82     | 59     | 71     |
| K03277 heptosyltransferase IV [EC:2.4.-.]                                                                                                           | 0      | 1      | 0      | 0      | 0      | 2      | 0      | 0      | 0      | 0      | 0      | 0      |
| K03760 lipid A ethanolaminephosphotransferase [EC:2.7.8.43]                                                                                         | 3898   | 3769   | 3561   | 3734   | 2223   | 2275   | 2116   | 2246   | 2325   | 2238   | 2254   | 2280   |
| K06041 arabinose-5-phosphate isomerase [EC:5.3.1.13]                                                                                                | 1936   | 1913   | 1875   | 1927   | 2737   | 2829   | 2835   | 2656   | 2108   | 2325   | 2257   | 2307   |
| K07031 D-glycero-alpha-D-manno-heptose-7-phosphate kinase [EC:2.7.1.168]                                                                            | 2056   | 2087   | 2180   | 2135   | 2988   | 2871   | 3189   | 3087   | 3007   | 3028   | 3033   | 3081   |
| K07264 4-amino-4-deoxy-L-arabinose transferase [EC:2.4.2.43]                                                                                        | 2759   | 2548   | 2371   | 2608   | 1493   | 1523   | 1410   | 1659   | 1853   | 1839   | 1702   | 1928   |
| K09778 Kdo2-lipid IVA 3' secondary acyltransferase [EC:2.3.1.-]                                                                                     | 3      | 3      | 5      | 7      | 0      | 0      | 3      | 2      | 1      | 0      | 2      | 1      |
| K12973 lipid IVA palmitoyltransferase [EC:2.3.1.251]                                                                                                | 327    | 330    | 358    | 339    | 287    | 318    | 314    | 313    | 478    | 599    | 525    | 532    |
| K12974 Kdo2-lipid IV(A) palmitoleoyltransferase [EC:2.3.1.242]                                                                                      | 500    | 504    | 485    | 554    | 334    | 414    | 367    | 350    | 707    | 701    | 678    | 821    |
| K12975 KDO II ethanolaminephosphotransferase [EC:2.7.8.42]                                                                                          | 1181   | 1121   | 1104   | 1121   | 806    | 806    | 771    | 791    | 1578   | 1572   | 1557   | 1592   |
| K12976 lipid A 3-O-deacylase [EC:3.1.1.-]                                                                                                           | 426    | 467    | 442    | 421    | 257    | 274    | 315    | 373    | 138    | 136    | 141    | 142    |
| K12979 beta-hydroxylase [EC:1.14.11.-]                                                                                                              | 3162   | 3088   | 3045   | 3050   | 1659   | 1635   | 1596   | 1728   | 1543   | 1377   | 1480   | 1554   |
| K12981 KDO transferase II [EC:2.4.99.-]                                                                                                             | 86     | 88     | 82     | 82     | 123    | 114    | 172    | 128    | 0      | 1      | 0      | 0      |
| K12983 UDP-glucose:[glucosyl]LPS beta-1,3-glucosyltransferase [EC:2.4.1.-]                                                                          | 2      | 0      | 0      | 2      | 15     | 14     | 11     | 13     | 43     | 44     | 49     | 44     |
| K12985 (galactosyl)LPS 1,2-glucosyltransferase [EC:2.4.1.-]                                                                                         | 1      | 3      | 1      | 6      | 8      | 15     | 5      | 4      | 35     | 49     | 55     | 50     |
| K12986 1,5-rhamnosyltransferase [EC:2.4.1.-]                                                                                                        | 0      | 0      | 0      | 0      | 3      | 0      | 2      | 0      | 0      | 0      | 0      | 1      |
| K15669 D-glycero-alpha-D-manno-heptose 1-phosphate guanylyltransferase [EC:2.7.7.71]                                                                | 672    | 663    | 749    | 639    | 1895   | 1754   | 1964   | 1889   | 1498   | 1401   | 1434   | 1430   |
| K19353 heptose-I-phosphate ethanolaminephosphotransferase [EC:2.7.8.-]                                                                              | 3056   | 2983   | 3105   | 2989   | 1698   | 1800   | 1585   | 1716   | 1257   | 1230   | 1256   | 1260   |
| K19803 Kdo2-lipid A phosphotransferase [EC:2.7.4.29]                                                                                                | 829    | 826    | 764    | 838    | 499    | 599    | 443    | 486    | 723    | 765    | 630    | 745    |
| K21344 D-glycero-beta-D-manno-heptose-7-phosphate kinase [EC:2.7.1.167]                                                                             | 56     | 63     | 62     | 47     | 88     | 84     | 86     | 93     | 78     | 87     | 77     | 81     |
| K21345 D-glycero-beta-D-manno-heptose 1-phosphate adenyllyltransferase [EC:2.7.7.70]                                                                | 33     | 23     | 40     | 27     | 39     | 37     | 43     | 54     | 47     | 29     | 32     | 41     |
| K23067 beta-1,4-galactosyltransferase                                                                                                               | 0      | 0      | 0      | 0      | 0      | 0      | 0      | 0      | 0      | 0      | 0      | 1      |
| ko00550 Peptidoglycan biosynthesis                                                                                                                  | 86848  | 87008  | 87124  | 86745  | 88584  | 90742  | 90751  | 89004  | 93249  | 94341  | 93030  | 93778  |
| K00687 penicillin-binding protein 28                                                                                                                | 110    | 135    | 106    | 126    | 39     | 39     | 32     | 21     | 116    | 185    | 110    | 144    |
| K00887 undecaprenol kinase [EC:2.7.1.66]                                                                                                            | 25     | 23     | 29     | 15     | 3      | 5      | 8      | 8      | 31     | 35     | 39     | 29     |
| K01000 phospho-N-acetylmuramoyl-pentapeptide-transferase [EC:2.7.8.13]                                                                              | 2617   | 2792   | 2880   | 2888   | 3912   | 4145   | 4297   | 3919   | 4056   | 4316   | 4115   | 3923   |
| K02563 UDP-N-acetylglucosamine-N-acetylmuramyl(pentapeptide) pyrophosphoryl-undecaprenol N-acetylglucosamine transferase [EC:2.4.1.227]             | 3791   | 3850   | 3717   | 3791   | 4322   | 4365   | 4445   | 4345   | 4045   | 3783   | 3953   | 3955   |
| K03587 cell division protein FtsI (penicillin-binding protein 3) [EC:3.4.16.4]                                                                      | 7696   | 7695   | 7686   | 7682   | 8334   | 8378   | 8283   | 8372   | 8046   | 7716   | 7911   | 7807   |
| K03693 penicillin-binding protein 1B                                                                                                                | 125    | 118    | 93     | 124    | 17     | 45     | 26     | 40     | 115    | 159    | 117    | 118    |
| K03814 monofunctional glycosyltransferase [EC:2.4.1.129]                                                                                            | 2004   | 2089   | 2011   | 2010   | 2209   | 2110   | 2163   | 2224   | 1960   | 1845   | 1838   | 1928   |
| K05362 UDP-N-acetylmuramoyl-L-alanyl-D-glutamate-L-lysine ligase [EC:6.3.2.7]                                                                       | 80     | 98     | 104    | 99     | 19     | 17     | 23     | 22     | 102    | 136    | 82     | 94     |
| K05363 serine/alanine adding enzyme [EC:2.3.2.10]                                                                                                   | 48     | 65     | 51     | 72     | 4      | 7      | 7      | 9      | 76     | 72     | 50     | 60     |
| K05364 penicillin-binding protein A                                                                                                                 | 396    | 381    | 382    | 369    | 78     | 77     | 117    | 86     | 310    | 408    | 358    | 395    |
| K05365 penicillin-binding protein 1B [EC:2.4.1.129 3.4.16.4]                                                                                        | 5137   | 5053   | 5024   | 5118   | 3198   | 3236   | 2919   | 3065   | 3079   | 3245   | 3213   | 3295   |
| K05366 penicillin-binding protein 1A [EC:2.4.1.129 3.4.16.4]                                                                                        | 8090   | 8285   | 8511   | 8221   | 8144   | 8350   | 8238   | 8210   | 8035   | 8209   | 8080   | 8270   |
| K05367 penicillin-binding protein 1C [EC:2.4.1.129]                                                                                                 | 2517   | 2542   | 2480   | 2586   | 4923   | 5069   | 5341   | 4910   | 4851   | 4925   | 4855   | 4779   |
| K05515 penicillin-binding protein 2 [EC:3.4.16.4]                                                                                                   | 6289   | 6351   | 6261   | 6331   | 6424   | 6962   | 6650   | 6492   | 7691   | 7628   | 7682   | 7322   |
| K06153 undecaprenyl-diphosphate [EC:3.6.1.27]                                                                                                       | 2935   | 3057   | 3042   | 2946   | 3187   | 3061   | 3096   | 3008   | 3367   | 3219   | 3317   | 3238   |
| K07009 lipid II isoglutaminyl synthase [glutamine-hydrolysing] [EC:6.3.5.13]                                                                        | 92     | 118    | 91     | 92     | 87     | 76     | 73     | 90     | 145    | 161    | 170    | 154    |
| K07258 serine-type D-Ala-D-Ala carboxypeptidase (penicillin-binding protein 5/6) [EC:3.4.16.4]                                                      | 6654   | 6142   | 6430   | 6460   | 2947   | 3104   | 2973   | 2969   | 5581   | 5957   | 5625   | 5964   |
| K07259 serine-type D-Ala-D-Ala carboxypeptidase/endopeptidase (penicillin-binding protein 4) [EC:3.4.16.4 3.4.21.-]                                 | 3295   | 3261   | 3325   | 3077   | 4556   | 4888   | 5044   | 4764   | 4140   | 3979   | 4147   | 4049   |
| K07260 zinc D-Ala-D-Ala carboxypeptidase [EC:3.4.17.14]                                                                                             | 295    | 265    | 307    | 294    | 80     | 88     | 86     | 85     | 312    | 364    | 325    | 337    |
| K08384 stage V sporulation protein D (sporulation-specific penicillin-binding protein)                                                              | 1553   | 1440   | 1465   | 1499   | 413    | 438    | 483    | 406    | 1472   | 1676   | 1652   | 1640   |
| K08724 penicillin-binding protein 28                                                                                                                | 3      | 3      | 3      | 4      | 7      | 15     | 19     | 0      | 9      | 5      | 5      | 11     |
| K11693 peptidoglycan pentaglycine glycine transferase (the first glycine) [EC:2.3.2.16]                                                             | 0      | 2      | 0      | 0      | 0      | 0      | 0      | 0      | 0      | 0      | 2      | 0      |
| K11694 peptidoglycan pentaglycine glycine transferase (the second and third glycine) [EC:2.3.2.17]                                                  | 0      | 0      | 0      | 0      | 0      | 0      | 0      | 0      | 3      | 1      | 2      | 0      |
| K12554 alanine adding enzyme [EC:2.3.2.-]                                                                                                           | 76     | 102    | 90     | 50     | 16     | 15     | 18     | 11     | 81     | 87     | 87     | 99     |
| K12555 penicillin-binding protein 2A [EC:2.4.1.129 3.4.16.4]                                                                                        | 263    | 337    | 304    | 311    | 64     | 60     | 72     | 60     | 250    | 299    | 216    | 232    |
| K12556 penicillin-binding protein 2X                                                                                                                | 107    | 115    | 107    | 117    | 36     | 39     | 35     | 22     | 131    | 140    | 137    | 128    |
| K18149 penicillin-binding protein                                                                                                                   | 106    | 97     | 88     | 98     | 15     | 8      | 17     | 11     | 85     | 94     | 79     | 119    |
| K18770 penicillin-binding protein 4 [EC:2.4.1.129 3.4.16.4]                                                                                         | 2      | 0      | 0      | 0      | 0      | 0      | 0      | 5      | 0      | 0      | 0      | 0      |
| K18866 zinc D-Ala-D-Ala dipeptidase/carboxypeptidase [EC:3.4.13.22 3.4.17.14]                                                                       | 7      | 5      | 12     | 5      | 8      | 0      | 4      | 4      | 4      | 8      | 9      | 5      |
| K19302 undecaprenyl-diphosphate [EC:3.6.1.27]                                                                                                       | 3331   | 3310   | 3180   | 3247   | 2750   | 2751   | 2951   | 3076   | 2635   | 2592   | 2702   | 2670   |
| K21464 penicillin-binding protein 2D [EC:2.4.1.129 3.4.16.4]                                                                                        | 6      | 5      | 5      | 4      | 5      | 7      | 4      | 3      | 14     | 9      | 8      | 11     |
| K21465 penicillin-binding protein A                                                                                                                 | 0      | 0      | 2      | 0      | 3      | 4      | 3      | 2      | 3      | 7      | 0      | 0      |
| K21469 serine-type D-Ala-D-Ala carboxypeptidase [EC:3.4.16.4]                                                                                       | 3      | 0      | 0      | 0      | 13     | 10     | 10     | 9      | 10     | 9      | 7      | 15     |
| K23393 lipid II isoglutaminyl synthase [glutamine-hydrolysing] [EC:6.3.5.13]                                                                        | 209    | 204    | 209    | 223    | 156    | 153    | 109    | 107    | 288    | 307    | 278    | 331    |
| ko00511 Other glycan degradation                                                                                                                    | 64353  | 68557  | 72676  | 68431  | 166618 | 166689 | 169506 | 165064 | 136142 | 130969 | 136413 | 130815 |
| K01191 alpha-mannosidase [EC:3.2.1.24]                                                                                                              | 4577   | 4779   | 4906   | 4864   | 5245   | 5153   | 5480   | 5166   | 8407   | 8418   | 8678   | 8612   |
| K01192 beta-mannosidase [EC:3.2.1.25]                                                                                                               | 5160   | 5322   | 5520   | 5290   | 9105   | 8987   | 9196   | 8860   | 11382  | 11333  | 11323  | 11053  |
| K01206 alpha-L-fucosidase [EC:3.2.1.51]                                                                                                             | 5778   | 5816   | 6254   | 5966   | 12704  | 12642  | 12804  | 12621  | 11046  | 10391  | 10911  | 10345  |
| K01227 mannosyl glycoprotein endo-beta-N-acetylglucosaminidase [EC:3.2.1.96]                                                                        | 868    | 851    | 866    | 874    | 15     | 209    | 140    | 124    | 469    | 569    | 542    | 553    |
| K01444 N4-(beta-N-acetylglucosaminyl)-L-asparaginase [EC:3.5.1.26]                                                                                  | 2      | 0      | 0      | 0      | 0      | 0      | 0      | 0      | 0      | 0      | 2      | 1      |
| K15923 alpha-L-fucosidase 2 [EC:3.2.1.51]                                                                                                           | 9302   | 10187  | 10877  | 10000  | 31704  | 31856  | 32206  | 31458  | 29944  | 22760  | 24037  | 22497  |
| ko00571 Lipoarabinomannan (LAM) biosynthesis                                                                                                        | 1751   | 1744   | 1665   | 1680   | 1219   | 1166   | 1119   | 1207   | 693    | 621    | 662    | 751    |
| K08256 phosphatidyl-myo-inositol alpha-mannosyltransferase [EC:2.4.1.345]                                                                           | 60     | 79     | 76     | 85     | 270    | 285    | 292    | 268    | 186    | 175    | 178    | 183    |
| K14335 alpha-1,6-mannosyltransferase [EC:2.4.1.-]                                                                                                   | 1691   | 1663   | 1589   | 1595   | 949    | 881    | 827    | 939    | 507    | 446    | 484    | 568    |
| K22311 phosphatidylinositol dimannoside acyltransferase [EC:2.3.1.265]                                                                              | 0      | 2      | 0      | 0      | 0      | 0      | 0      | 0      | 0      | 0      | 0      | 0      |
| ko00572 Arabinogalactan biosynthesis - Mycobacterium                                                                                                | 904    | 770    | 775    | 775    | 607    | 626    | 652    | 604    | 1030   | 1153   | 1085   | 1109   |
| K02851 UDP-GlcNAc:undecaprenyl-phosphate/decaprenyl-phosphate GlcNAc-1-phosphate transferase [EC:2.7.8.33 2.7.8.35]                                 | 899    | 768    | 770    | 768    | 601    | 622    | 649    | 597    | 1015   | 1125   | 1085   | 1095   |
| K16650 galactofuranosylgalactofuranosylrhamnosyl-N-acetylglucosaminyl-diphospho-decaprenol beta-1,5-/1,6-galactofuranosyltransferase [EC:2.4.1.288] | 0      | 0      | 0      | 0      | 0      | 1      | 3      | 0      | 6      | 17     | 0      | 10     |
| K22902 D-galactosaminyltransferase                                                                                                                  | 5      | 2      | 5      | 7      | 6      | 3      | 0      | 7      | 9      | 11     | 0      | 4      |
| Metabolism of cofactors and vitamins                                                                                                                | 355572 | 534387 | 523670 | 530729 | 500589 | 500853 | 497817 | 500763 | 493153 | 490778 | 487504 | 492888 |
| ko00730 Thiamine metabolism                                                                                                                         | 50870  | 51286  | 51216  | 51131  | 57812  | 58113  | 58381  | 57578  | 55567  | 56271  | 55802  | 55628  |
| K00788 thiamine-phosphate pyrophosphorylase [EC:2.5.1.3]                                                                                            | 2332   | 2451   | 2410   | 2347   | 3140   | 3356   | 3377   | 3192   | 3054   | 3112   | 3124   | 3008   |
| K00877 hydroxymethylpyrimidine/phosphomethylpyrimidine kinase / thiaminase [EC:2.7.1.49 2.7.4.7 3.5.99.2]                                           | 1      | 0      | 0      | 0      | 1      | 0      | 0      | 0      | 0      | 0      | 1      | 1      |
| K00878 hydroxyethylthiazole kinase [EC:2.7.1.50]                                                                                                    | 1075   | 1055   | 979    | 1087   | 494    | 461    | 464    | 500    | 1125   | 1242   | 1289   | 1205   |
| K00941 hydroxymethylpyrimidine/phosphomethylpyrimidine kinase [EC:2.7.1.49 2.7.4.7]                                                                 | 253    |        |        |        |        |        |        |        |        |        |        |        |

|                                                                                                                                          |       |       |       |       |       |       |       |       |       |       |       |       |
|------------------------------------------------------------------------------------------------------------------------------------------|-------|-------|-------|-------|-------|-------|-------|-------|-------|-------|-------|-------|
| K05368 aquacobalamin reductase / NAD(P)H-flavin reductase [EC:1.16.1.3 1.5.1.41]                                                         | 494   | 491   | 431   | 458   | 324   | 363   | 321   | 358   | 616   | 705   | 678   | 647   |
| K07732 riboflavin kinase, archaea type [EC:2.7.1.161]                                                                                    | 0     | 0     | 1     | 0     | 0     | 0     | 0     | 0     | 0     | 0     | 0     | 4     |
| K08096 GTP cyclohydrolase IIa [EC:3.5.4.29]                                                                                              | 0     | 0     | 0     | 0     | 0     | 0     | 0     | 0     | 2     | 1     | 0     | 9     |
| K09474 acid phosphatase (class A) [EC:3.1.3.2]                                                                                           | 324   | 343   | 281   | 298   | 221   | 196   | 215   | 167   | 500   | 502   | 523   | 577   |
| K11752 diaminohydroxyphosphoribosylaminopyrimidine deaminase / 5-amino-6-[5-phosphoribosylamino]uracil reductase [EC:3.5.4.26 1.1.1.193] | 3137  | 3256  | 3132  | 3150  | 3768  | 3781  | 3814  | 3841  | 3253  | 3172  | 3285  | 3229  |
| K11753 riboflavin kinase / FMN adenylyltransferase [EC:2.7.1.26 2.7.7.2]                                                                 | 3398  | 3497  | 3462  | 3572  | 3861  | 3778  | 3835  | 3685  | 3328  | 3489  | 3526  | 3620  |
| K14379 tartrate-resistant acid phosphatase type 5 [EC:3.1.3.2]                                                                           | 0     | 0     | 2     | 0     | 0     | 0     | 0     | 0     | 0     | 1     | 0     | 0     |
| K14652 3,4-dihydroxy-2-butanone 4-phosphate synthase / GTP cyclohydrolase II [EC:4.1.99.12 3.5.4.25]                                     | 2644  | 2748  | 2624  | 2532  | 4167  | 3995  | 4181  | 4032  | 2922  | 2656  | 2914  | 2777  |
| K14653 2-amino-5-formylamino-6-ribosylaminopyrimidin-4(3H)-one 5'-monophosphate deformylase [EC:3.5.1.102]                               | 0     | 1     | 0     | 0     | 3     | 0     | 2     | 0     | 2     | 7     | 0     | 2     |
| K14654 2,5-diamino-6-(ribosylamino)-4(3H)-pyrimidinone 5'-phosphate reductase [EC:1.1.1.302]                                             | 88    | 102   | 120   | 106   | 19    | 23    | 9     | 12    | 56    | 68    | 76    | 77    |
| K14655 tRNA pseudouridine32 synthase / 2,5-diamino-6-(5-phospho-D-ribitylamino)-pyrimidin-4(3H)-one deaminase [EC:5.4.99.28]             | 0     | 1     | 0     | 0     | 0     | 0     | 0     | 0     | 0     | 0     | 0     | 0     |
| K14656 FAD synthetase [EC:2.7.7.2]                                                                                                       | 0     | 2     | 0     | 1     | 0     | 0     | 0     | 2     | 3     | 5     | 2     | 3     |
| K19285 FMN reductase [NADPH] [EC:1.5.1.38]                                                                                               | 284   | 258   | 313   | 245   | 57    | 61    | 59    | 33    | 152   | 233   | 198   | 174   |
| K19286 FMN reductase [NAD(P)H] [EC:1.5.1.39]                                                                                             | 0     | 2     | 9     | 4     | 0     | 4     | 3     | 1     | 4     | 4     | 5     | 5     |
| K20861 FMN hydrolase / 5-amino-6-[5-phospho-D-ribitylamino]uracil phosphatase [EC:3.1.3.102 3.1.3.104]                                   | 253   | 283   | 235   | 273   | 74    | 89    | 90    | 74    | 574   | 606   | 520   | 603   |
| K20862 FMN hydrolase / 5-amino-6-[5-phospho-D-ribitylamino]uracil phosphatase [EC:3.1.3.102 3.1.3.104]                                   | 1697  | 1768  | 1620  | 1671  | 963   | 1019  | 936   | 1056  | 994   | 1014  | 957   | 1087  |
| K20884 riboflavin kinase / FMN hydrolase [EC:2.7.1.26 3.1.3.102]                                                                         | 0     | 1     | 0     | 1     | 2     | 1     | 1     | 2     | 3     | 3     | 0     | 3     |
| K21063 5-amino-6-[5-phospho-D-ribitylamino]uracil phosphatase [EC:3.1.3.104]                                                             | 388   | 408   | 421   | 395   | 1222  | 1162  | 1305  | 1153  | 830   | 797   | 854   | 840   |
| K21064 5-amino-6-[5-phospho-D-ribitylamino]uracil phosphatase [EC:3.1.3.104]                                                             | 46    | 48    | 58    | 35    | 20    | 6     | 19    | 14    | 49    | 71    | 64    | 42    |
| K23293 flavin reductase (NADH) subunit 1 [EC:1.5.1.36]                                                                                   | 0     | 2     | 2     | 1     | 2     | 0     | 0     | 2     | 2     | 0     | 2     | 0     |
| K23294 flavin reductase (NADH) subunit 2 [EC:1.5.1.36]                                                                                   | 0     | 0     | 0     | 0     | 2     | 2     | 0     | 0     | 2     | 0     | 0     | 1     |
| ko00750 Vitamin B6 metabolism                                                                                                            | 23086 | 22667 | 23367 | 23030 | 24096 | 24317 | 24101 | 24190 | 23554 | 23284 | 23850 | 23711 |
| K00097 4-hydroxythreonine-4-phosphate dehydrogenase [EC:1.1.1.262]                                                                       | 2900  | 2953  | 3132  | 2991  | 3372  | 3586  | 3568  | 3516  | 2813  | 2853  | 3031  | 2932  |
| K00275 pyridoxamine 5'-phosphate oxidase [EC:1.4.3.5]                                                                                    | 1726  | 1683  | 1734  | 1679  | 2065  | 2058  | 2103  | 2149  | 1777  | 1748  | 1757  | 1745  |
| K00868 pyridoxine kinase [EC:2.7.1.35]                                                                                                   | 3578  | 3318  | 3436  | 3500  | 3294  | 3252  | 3229  | 3131  | 3631  | 3703  | 3660  | 3803  |
| K03472 D-erythrose 4-phosphate dehydrogenase [EC:1.2.1.72]                                                                               | 2305  | 2249  | 2257  | 2171  | 1443  | 1364  | 1336  | 1300  | 1414  | 1362  | 1385  | 1490  |
| K03473 erythrionate-4-phosphate dehydrogenase [EC:1.1.1.290]                                                                             | 2646  | 2529  | 2568  | 2668  | 2464  | 2501  | 2379  | 2635  | 2134  | 2163  | 2225  | 2385  |
| K03474 pyridoxine 5-phosphate synthase [EC:2.6.99.2]                                                                                     | 1775  | 1969  | 1952  | 1812  | 2458  | 2493  | 2542  | 2416  | 2119  | 2156  | 2131  | 1970  |
| K05275 pyridoxine 4-dehydrogenase [EC:1.1.1.65]                                                                                          | 465   | 476   | 494   | 556   | 375   | 374   | 337   | 353   | 780   | 749   | 789   | 740   |
| K06215 pyridoxal 5'-phosphate synthase pdxS subunit [EC:4.3.3.6]                                                                         | 220   | 174   | 229   | 199   | 57    | 62    | 88    | 55    | 377   | 384   | 351   | 362   |
| K06881 5'-phosphate synthase pdxT subunit [EC:4.3.3.6]                                                                                   | 93    | 95    | 88    | 108   | 26    | 27    | 33    | 30    | 208   | 222   | 190   | 212   |
| ko00760 Nicotinate and nicotinamide metabolism                                                                                           | 59558 | 60554 | 59167 | 60289 | 56365 | 56642 | 55916 | 56048 | 57758 | 57918 | 56796 | 57969 |
| K00322 NAD(P) transhydrogenase [EC:1.6.1.1]                                                                                              | 2781  | 2779  | 2718  | 2741  | 1775  | 1707  | 1608  | 1634  | 1688  | 2005  | 1783  | 1817  |
| K00324 H <sup>+</sup> -translocating NAD(P) transhydrogenase subunit alpha [EC:1.6.1.2 7.1.1.1]                                          | 2888  | 2849  | 2754  | 2906  | 1638  | 1695  | 1518  | 1726  | 1814  | 2016  | 1922  | 1929  |
| K00325 H <sup>+</sup> -translocating NAD(P) transhydrogenase subunit beta [EC:1.6.1.2 7.1.1.1]                                           | 2693  | 2723  | 2530  | 2680  | 1608  | 1625  | 1494  | 1679  | 1727  | 1767  | 1546  | 1640  |
| K00763 nicotinate phosphoribosyltransferase [EC:6.3.4.21]                                                                                | 5586  | 5535  | 5523  | 5912  | 5298  | 5116  | 4970  | 5139  | 4930  | 4817  | 4804  | 4864  |
| K00767 nicotinate-nucleotide pyrophosphorylase (carboxylating) [EC:2.4.2.19]                                                             | 2535  | 2631  | 2535  | 2675  | 2884  | 3032  | 2916  | 2886  | 2527  | 2422  | 2480  | 2451  |
| K00858 NAD <sup>+</sup> kinase [EC:2.7.1.23]                                                                                             | 2402  | 2491  | 2459  | 2402  | 2983  | 2853  | 2957  | 2879  | 2913  | 2792  | 2797  | 3023  |
| K00952 nicotinamide-nucleotide adenylyltransferase [EC:2.7.7.1]                                                                          | 0     | 0     | 2     | 1     | 0     | 0     | 0     | 0     | 2     | 2     | 4     | 4     |
| K00969 nicotinate-nucleotide adenylyltransferase [EC:2.7.7.18]                                                                           | 1937  | 1985  | 1914  | 1872  | 2119  | 2178  | 2093  | 2230  | 2280  | 1964  | 1991  | 2106  |
| K01440 nicotinamidase [EC:3.5.1.19]                                                                                                      | 1     | 3     | 2     | 2     | 1     | 0     | 4     | 2     | 4     | 2     | 2     | 4     |
| K01916 NAD <sup>+</sup> synthase [EC:6.3.1.5]                                                                                            | 1964  | 2007  | 1923  | 1863  | 1167  | 1176  | 1132  | 1231  | 1231  | 1249  | 1141  | 1332  |
| K01950 NAD <sup>+</sup> synthase (glutamine-hydrolysing) [EC:6.3.5.1]                                                                    | 1641  | 1831  | 1761  | 1693  | 2907  | 2996  | 3072  | 2914  | 2775  | 2845  | 2856  | 2671  |
| K03426 NAD <sup>+</sup> diphosphatase [EC:3.6.1.22]                                                                                      | 2450  | 2564  | 2504  | 2504  | 2686  | 2686  | 2733  | 2785  | 2295  | 2350  | 2267  | 2416  |
| K03462 nicotinamide phosphoribosyltransferase [EC:2.4.2.12]                                                                              | 316   | 300   | 294   | 274   | 392   | 430   | 469   | 434   | 8     | 21    | 7     | 5     |
| K03517 quinolinate synthase [EC:2.5.1.72]                                                                                                | 2648  | 2927  | 2791  | 2837  | 3454  | 3466  | 3466  | 3475  | 3065  | 2987  | 3012  | 2910  |
| K03742 nicotinamide-nucleotide amidase [EC:3.5.1.42]                                                                                     | 1172  | 1183  | 1295  | 1218  | 2183  | 2336  | 2352  | 2279  | 2190  | 2152  | 2240  | 2092  |
| K03743 nicotinamide-nucleotide amidase [EC:3.5.1.42]                                                                                     | 1064  | 1001  | 1037  | 979   | 684   | 754   | 695   | 749   | 654   | 601   | 662   | 682   |
| K06211 HTH-type transcriptional regulator, transcriptional repressor of NAD biosynthesis genes [EC:2.7.7.1 2.7.1.2]                      | 840   | 843   | 815   | 782   | 546   | 548   | 485   | 510   | 1189  | 1171  | 1161  | 1174  |
| K06989 aspartate dehydrogenase [EC:1.4.1.21]                                                                                             | 859   | 938   | 1007  | 903   | 2005  | 1840  | 2028  | 1959  | 1554  | 1555  | 1521  | 1463  |
| K08281 nicotinamidase/pyrazinamidase [EC:3.5.1.19 3.5.1.-]                                                                               | 1235  | 1297  | 1163  | 1248  | 683   | 780   | 717   | 738   | 826   | 876   | 870   | 853   |
| K13522 bifunctional NMN adenylyltransferase/nudix hydrolase [EC:2.7.7.1 3.6.1.-]                                                         | 3     | 2     | 4     | 9     | 12    | 16    | 11    | 16    | 9     | 10    | 8     | 7     |
| K18029 nicotinate dehydrogenase subunit A [EC:1.17.2.1]                                                                                  | 749   | 786   | 699   | 827   | 402   | 387   | 388   | 397   | 265   | 216   | 232   | 231   |
| K18030 nicotinate dehydrogenase subunit B [EC:1.17.2.1]                                                                                  | 1     | 0     | 0     | 0     | 0     | 0     | 1     | 0     | 0     | 1     | 0     | 0     |
| K19647 2-hydroxymethylglutarate dehydrogenase [EC:1.1.1.291]                                                                             | 3     | 0     | 1     | 2     | 0     | 2     | 0     | 4     | 5     | 1     | 5     | 5     |
| K20445 nicotinate dehydrogenase FAD-subunit [EC:1.17.1.5]                                                                                | 10    | 5     | 9     | 15    | 3     | 1     | 3     | 2     | 7     | 6     | 6     | 4     |
| K20446 nicotinate dehydrogenase small FeS subunit [EC:1.17.1.5]                                                                          | 25    | 2     | 1     | 3     | 0     | 1     | 0     | 5     | 3     | 2     | 1     | 1     |
| K20447 nicotinate dehydrogenase large molybdopterin subunit [EC:1.17.1.5]                                                                | 3     | 31    | 31    | 35    | 11    | 5     | 8     | 13    | 20    | 18    | 19    | 18    |
| K20448 nicotinate dehydrogenase medium molybdopterin subunit [EC:1.17.1.5]                                                               | 0     | 0     | 0     | 0     | 0     | 0     | 0     | 0     | 0     | 0     | 0     | 0     |
| K20449 6-hydroxynicotinate reductase [EC:1.3.7.1]                                                                                        | 0     | 3     | 0     | 0     | 0     | 0     | 0     | 0     | 0     | 0     | 0     | 0     |
| K20451 methylasconate Delta-isomerase [EC:5.3.3.6]                                                                                       | 9     | 3     | 5     | 11    | 0     | 0     | 0     | 0     | 3     | 5     | 2     | 1     |
| K20452 dimethylmaleate hydratase large subunit [EC:4.2.1.85]                                                                             | 20    | 17    | 21    | 21    | 13    | 17    | 21    | 21    | 42    | 61    | 50    | 51    |
| K20453 dimethylmaleate hydratase small subunit [EC:4.2.1.85]                                                                             | 4     | 2     | 4     | 3     | 1     | 5     | 1     | 10    | 4     | 16    | 14    | 11    |
| K20454 2,3-dimethylmalate lyase [EC:4.1.3.32]                                                                                            | 10    | 3     | 6     | 6     | 0     | 0     | 0     | 0     | 6     | 3     | 7     | 5     |
| ko00770 Pantothenate and CoA biosynthesis                                                                                                | 63114 | 62017 | 61895 | 62925 | 55709 | 56100 | 54483 | 55734 | 58102 | 59151 | 58005 | 59172 |
| K00077 2-dehydropantoate-2-reductase [EC:1.1.1.169]                                                                                      | 3579  | 3561  | 3309  | 3444  | 3587  | 3491  | 3369  | 3663  | 3820  | 3883  | 3711  | 3763  |
| K00606 3-methyl-2-oxobutanoate hydroxymethyltransferase [EC:2.1.2.11]                                                                    | 3045  | 2788  | 2804  | 2908  | 3043  | 2993  | 2992  | 3058  | 2371  | 2307  | 2438  | 2362  |
| K00859 dephospho-CoA kinase [EC:2.7.1.24]                                                                                                | 1675  | 1650  | 1809  | 1684  | 1928  | 2039  | 1977  | 2001  | 1939  | 1992  | 1988  | 1995  |
| K00867 type I pantothenate kinase [EC:2.7.1.33]                                                                                          | 670   | 646   | 648   | 681   | 465   | 498   | 492   | 476   | 902   | 945   | 829   | 888   |
| K00954 pantetheine-phosphate adenylyltransferase [EC:2.7.7.3]                                                                            | 1663  | 1703  | 1758  | 1690  | 1844  | 1954  | 1803  | 1872  | 1711  | 1763  | 1769  | 1812  |
| K00997 holo-[acyl-carrier protein] synthase [EC:2.7.8.7]                                                                                 | 264   | 284   | 285   | 306   | 170   | 146   | 160   | 140   | 375   | 373   | 337   | 401   |
| K01598 phosphopantothoenylcysteine decarboxylase [EC:4.1.1.36]                                                                           | 31    | 43    | 30    | 38    | 5     | 13    | 10    | 7     | 34    | 57    | 26    | 32    |
| K02201 pantetheine-phosphate adenylyltransferase [EC:2.7.7.3]                                                                            | 0     | 1     | 2     | 0     | 0     | 3     | 1     | 0     | 2     | 0     | 2     | 3     |
| K03525 type III pantothenate kinase [EC:2.7.1.33]                                                                                        | 921   | 977   | 1016  | 985   | 1615  | 1725  | 1678  | 1703  | 1611  | 1536  | 1591  | 1657  |
| K06133 4'-phosphopantetheinyl transferase [EC:2.7.8.-]                                                                                   | 159   | 139   | 128   | 124   | 68    | 76    | 77    | 73    | 269   | 248   | 234   | 234   |
| K06982 pantoate kinase [EC:2.7.1.169]                                                                                                    | 0     | 0     | 2     | 0     | 2     | 0     | 0     | 8     | 1     | 3     | 5     | 5     |
| K09682 acyl carrier protein phosphodiesterase [EC:3.1.4.14]                                                                              | 454   | 438   | 392   | 407   | 255   | 293   | 263   | 221   | 622   | 670   | 617   | 678   |
| K09680 type II pantothenate kinase [EC:2.7.1.33]                                                                                         | 469   | 477   | 519   | 513   | 242   | 223   | 254   | 245   | 203   | 268   | 256   | 222   |
| K13038 phosphopantothoenylcysteine decarboxylase / phosphopantothenate--cysteine ligase [EC:4.1.1.36 6.3.2.5]                            | 3792  | 3774  | 3977  | 3930  | 4328  | 4285  | 4247  | 4235  | 3864  | 3742  | 3981  | 3962  |
| K21977 phosphopantothenate--cysteine ligase (CTP) [EC:6.3.2.5]                                                                           | 30    | 58    | 36    | 59    | 17    | 14    | 13    | 16    | 64    | 53    | 56    | 44    |
| ko00780 Biotin metabolism                                                                                                                | 52419 | 52001 | 51297 | 51644 | 50898 | 50582 | 50622 | 50821 | 47169 | 46759 | 46602 | 46867 |
| K00652 8-amino-7-oxononanoate synthase [EC:2.3.1.47]                                                                                     | 3864  | 3973  | 3828  | 4002  | 5987  | 6010  | 5968  | 6186  | 4780  | 4732  | 4738  | 4513  |
| K00833 adenosylmethionine--8-amino-7-oxononanoate aminotransferase [EC:2.6.1.62]                                                         | 4656  | 4722  | 4614  | 4617  | 6637  | 6775  | 6836  | 6557  | 5454  | 5287  | 5334  | 5309  |
| K01012 biotin synthase [EC:2.8.1.6]                                                                                                      | 3621  | 3621  | 3651  | 3482  | 3961  | 3827  | 4014  | 3916  | 3594  | 3594  | 3537  | 3486  |
| K01906 6-carboxyhexanoate--CoA ligase [EC:6.2.1.14]                                                                                      | 36    | 31    | 43    | 36    | 3     | 2     | 3     | 0     | 47    | 51    | 50    | 66    |
| K01935 dethiobiotin synthetase [EC:6.3.3.3]                                                                                              | 2240  | 2175  | 1965  | 2068  | 2315  | 2356  | 2229  | 2328  | 2340  | 2337  | 2244  | 2432  |
| K02169 malonyl-CoA O-methyltransferase [EC:2.1.1.197]                                                                                    | 2220  | 2226  | 2058  | 2114  | 2486  | 2417  | 2372  | 2491  | 2141  | 2005  | 1976  | 2027  |
| K02170 pimeloyl-[acyl-carrier protein] methyl ester esterase [EC:3.1.1.85]                                                               | 1319  | 1318  | 1166  | 1214  | 739   | 786   | 761   | 776   | 899   | 892   | 897   | 987   |
| K03524 BirA family transcriptional regulator, biotin operon repressor / biotin--[acyetyl-CoA-carboxylase] ligase [EC:6.3.4.15]           | 2884  | 2920  | 3011  | 3065  | 2971  | 2878  | 3016  | 2861  | 2984  | 2990  | 3044  | 3041  |
| K08351 biotin/methionine sulfoxide reductase [EC:1.-.-.-]                                                                                | 2765  | 2777  | 2770  | 2965  | 1999  | 2199  | 2088  | 2057  | 3616  | 3592  | 3542  | 3745  |
| K09789 pimeloyl-[acyl-carrier protein] methyl ester esterase [EC:3.1.1.85]                                                               | 420   | 412   | 515   | 460   | 1345  | 1381  | 1374  | 1372  | 929   | 945   | 947   | 891   |
| ko00785 Lipic acid metabolism                                                                                                            | 5132  | 5236  | 5166  | 5296  | 6687  | 6801  | 6843  | 6620  | 6268  |       |       |       |

|                                                                                                                                                            |        |        |        |        |       |       |       |       |       |       |       |       |
|------------------------------------------------------------------------------------------------------------------------------------------------------------|--------|--------|--------|--------|-------|-------|-------|-------|-------|-------|-------|-------|
| K07589 D-erythro-7,8-dihydroneopterin triphosphate epimerase [EC:5.1.99.7]                                                                                 | 710    | 719    | 711    | 738    | 412   | 411   | 452   | 487   | 460   | 460   | 431   | 422   |
| K08310 dihydroneopterin triphosphate diphosphatase [EC:3.6.1.67]                                                                                           | 267    | 215    | 243    | 272    | 207   | 200   | 185   | 191   | 345   | 336   | 349   | 334   |
| K09007 GTP cyclohydrolase IB [EC:3.5.4.16]                                                                                                                 | 1681   | 1672   | 1617   | 1648   | 929   | 927   | 955   | 995   | 585   | 581   | 526   | 602   |
| K09457 7-cyano-7-deazaguanine reductase [EC:1.7.1.13]                                                                                                      | 280    | 306    | 328    | 315    | 969   | 913   | 1012  | 960   | 718   | 766   | 700   | 668   |
| K09739 dihydroneopterin aldolase [EC:4.1.2.25]                                                                                                             | 0      | 0      | 2      | 0      | 1     | 0     | 0     | 0     | 1     | 3     | 1     | 4     |
| K10026 7-carboxy-7-deazaguanine synthase [EC:4.3.99.3]                                                                                                     | 1826   | 1828   | 1887   | 1846   | 2044  | 2061  | 2148  | 2107  | 1737  | 1666  | 1679  | 1801  |
| K11754 dihydrofolate synthase / folypolyglutamate synthase [EC:6.3.2.12 6.3.2.17]                                                                          | 3561   | 3514   | 3520   | 3516   | 4296  | 4091  | 4236  | 4304  | 4116  | 3981  | 4245  | 4130  |
| K13818 molybdopterin-guanine dinucleotide biosynthesis protein [EC:2.7.7.77]                                                                               | 49     | 35     | 55     | 46     | 30    | 41    | 35    | 36    | 16    | 30    | 15    | 20    |
| K13938 dihydromanopterin reductase / dihydrofolate reductase [EC:1.5.1.50 1.5.1.3]                                                                         | 761    | 842    | 766    | 768    | 473   | 460   | 376   | 451   | 711   | 632   | 630   | 692   |
| K13939 dihydroneopterin aldolase / 2-amino-4-hydroxy-6-hydroxymethylidihydropteridine diphosphokinase [EC:4.1.2.25 2.7.6.2]                                | 0      | 0      | 2      | 0      | 0     | 0     | 0     | 0     | 0     | 0     | 0     | 0     |
| K13940 dihydroneopterin aldolase / 2-amino-4-hydroxy-6-hydroxymethylidihydropteridine diphosphokinase [EC:4.1.2.25 2.7.6.3]                                | 87     | 107    | 104    | 111    | 23    | 41    | 24    | 24    | 154   | 181   | 153   | 200   |
| K13950 para-aminobenzoate synthetase [EC:2.6.1.85]                                                                                                         | 0      | 0      | 2      | 1      | 0     | 0     | 0     | 0     | 0     | 0     | 1     | 1     |
| K15376 gephyrin [EC:2.10.1.1 2.7.7.75]                                                                                                                     | 1      | 0      | 3      | 3      | 1     | 1     | 4     | 2     | 0     | 2     | 2     | 3     |
| K17488 GTP cyclohydrolase IV [EC:3.5.4.39]                                                                                                                 | 0      | 2      | 0      | 1      | 2     | 5     | 0     | 0     | 1     | 9     | 3     | 8     |
| K18590 dihydrofolate reductase (trimethoprim resistance protein) [EC:1.5.1.3]                                                                              | 0      | 0      | 0      | 0      | 0     | 1     | 0     | 0     | 0     | 0     | 0     | 1     |
| K18824 dihydropterate synthase type 2 [EC:2.5.1.15]                                                                                                        | 0      | 0      | 0      | 0      | 0     | 0     | 0     | 0     | 0     | 3     | 0     | 1     |
| K18853 dihydromethanopterin reductase (acceptor) [EC:1.5.99.15]                                                                                            | 2      | 0      | 3      | 0      | 0     | 0     | 0     | 0     | 0     | 2     | 2     | 6     |
| K18974 dihydropterate synthase type 1 [EC:2.5.1.15]                                                                                                        | 0      | 0      | 0      | 0      | 3     | 0     | 2     | 2     | 4     | 0     | 2     | 2     |
| K20967 GTP 3',8-cyclase / cyclic pyranopterin monophosphate synthase [EC:4.1.99.22 4.6.1.17]                                                               | 0      | 0      | 0      | 0      | 0     | 0     | 0     | 3     | 1     | 0     | 0     | 0     |
| ko00670 One carbon pool by folate                                                                                                                          | 54772  | 54409  | 54069  | 54069  | 59811 | 59720 | 60266 | 59574 | 56390 | 54279 | 54334 | 54214 |
| K00288 methylenetetrahydrofolate dehydrogenase (NADP+) / methylenetetrahydrofolate cyclohydrolase / formyltetrahydrofolate synthetase [EC:1.5.1.5 3.5.4.0] | 0      | 0      | 1      | 0      | 0     | 0     | 0     | 2     | 0     | 0     | 0     | 0     |
| K00604 methionyl-tRNA formyltransferase [EC:2.1.9.9]                                                                                                       | 3337   | 3486   | 3389   | 3382   | 3518  | 3551  | 3628  | 3484  | 3402  | 3362  | 3462  | 3391  |
| K01500 methylenetetrahydrofolate cyclohydrolase [EC:3.5.4.9]                                                                                               | 20     | 9      | 9      | 7      | 1     | 3     | 0     | 3     | 11    | 14    | 20    | 15    |
| K01746 formiminotetrahydrofolate cyclodeaminase [EC:4.3.1.4]                                                                                               | 1      | 0      | 0      | 0      | 34    | 28    | 34    | 21    | 3     | 4     | 4     | 7     |
| K01934 5-formyltetrahydrofolate cyclo-ligase [EC:6.3.3.2]                                                                                                  | 1982   | 1962   | 1802   | 1880   | 2027  | 2058  | 1962  | 1890  | 1803  | 1750  | 1746  | 1715  |
| K13403 methylenetetrahydrofolate dehydrogenase(NAD+) / 5,10-methylenetetrahydrofolate cyclohydrolase [EC:1.5.1.15 3.5.4.9]                                 | 0      | 0      | 1      | 0      | 0     | 0     | 0     | 0     | 0     | 1     | 1     | 0     |
| ko00830 Retinol metabolism                                                                                                                                 | 5941   | 6112   | 5761   | 5748   | 3891  | 3929  | 3897  | 3874  | 4653  | 4767  | 4640  | 4615  |
| K07249 retinal dehydrogenase [EC:1.2.1.36]                                                                                                                 | 0      | 1      | 0      | 0      | 0     | 0     | 0     | 0     | 1     | 0     | 0     | 0     |
| K09516 all-trans-retinol 13,14-reductase [EC:1.3.99.23]                                                                                                    | 166    | 209    | 195    | 173    | 300   | 277   | 335   | 302   | 19    | 50    | 29    | 34    |
| K11153 retinol dehydrogenase 12 [EC:1.1.1.300]                                                                                                             | 1      | 0      | 0      | 0      | 0     | 1     | 0     | 0     | 0     | 0     | 1     | 0     |
| K15734 all-trans-retinol dehydrogenase (NAD+) [EC:1.1.1.105]                                                                                               | 0      | 0      | 1      | 1      | 0     | 0     | 0     | 0     | 0     | 0     | 0     | 0     |
| ko00860 Porphyrin and chlorophyll metabolism                                                                                                               | 107231 | 106167 | 101632 | 103492 | 85572 | 84623 | 83570 | 85907 | 87872 | 86755 | 86125 | 88181 |
| K00228 coproporphyrinogen III oxidase [EC:1.3.3.3]                                                                                                         | 1705   | 1678   | 1563   | 1636   | 1004  | 1006  | 907   | 1004  | 1132  | 1089  | 1047  | 1205  |
| K00230 menaquinone-dependent protoporphyrinogen oxidase [EC:1.3.5.3]                                                                                       | 643    | 656    | 658    | 601    | 1344  | 1476  | 1412  | 1398  | 1393  | 1233  | 1347  | 1301  |
| K00231 protoporphyrinogen/coproporphyrinogen III oxidase [EC:1.3.3.4 1.3.3.15]                                                                             | 21     | 19     | 9      | 23     | 3     | 4     | 2     | 1     | 5     | 6     | 2     | 3     |
| K00435 Fe-coproporphyrin III decarboxylase [EC:1.11.1.-]                                                                                                   | 5      | 1      | 16     | 4      | 0     | 2     | 0     | 0     | 0     | 0     | 0     | 0     |
| K00595 precorrin-6Y C5,15-methyltransferase (decarboxylating) [EC:2.1.1.132]                                                                               | 2323   | 2527   | 2392   | 2232   | 2508  | 2397  | 2435  | 2517  | 1992  | 1918  | 1940  | 1911  |
| K00768 nicotinate-nucleotide--dimethylbenzimidazole phosphoribosyltransferase [EC:2.4.2.21]                                                                | 3496   | 3344   | 3195   | 3212   | 3467  | 3553  | 3463  | 3463  | 4066  | 4046  | 4190  | 4181  |
| K00798 cob(I)alamine adenosyltransferase [EC:2.5.1.7]                                                                                                      | 1525   | 1524   | 1519   | 1485   | 1838  | 1768  | 1950  | 1872  | 1274  | 1233  | 1348  | 1355  |
| K01599 uroporphyrinogen decarboxylase [EC:4.1.1.37]                                                                                                        | 4728   | 4731   | 4722   | 4832   | 4010  | 3847  | 3962  | 3800  | 5051  | 5254  | 5075  | 5250  |
| K01698 porphobilinogen synthase [EC:4.2.1.24]                                                                                                              | 1666   | 1702   | 1755   | 1713   | 1127  | 1159  | 1066  | 1119  | 1610  | 1740  | 1710  | 1633  |
| K01719 uroporphyrinogen-III synthase [EC:4.2.1.75]                                                                                                         | 2077   | 2174   | 2045   | 2125   | 2745  | 2754  | 2751  | 2744  | 2278  | 2258  | 2234  | 2258  |
| K01740 hydroxymethylbilane synthase [EC:2.5.1.61]                                                                                                          | 2741   | 2709   | 2590   | 2731   | 1548  | 1509  | 1568  | 1546  | 1858  | 1789  | 1711  | 1851  |
| K01772 protoporphyrin/coproporphyrin ferrochelatase [EC:4.99.1.1 4.99.1.9]                                                                                 | 2321   | 2326   | 2140   | 2411   | 1410  | 1385  | 1469  | 1402  | 1427  | 1399  | 1430  | 1451  |
| K01845 glutamate-1-semialdehyde 2,1-aminomutase [EC:5.4.3.8]                                                                                               | 4650   | 4500   | 4416   | 4575   | 2808  | 2739  | 2266  | 2515  | 2773  | 2796  | 2700  | 2837  |
| K01885 glutamyl-tRNA synthetase [EC:6.1.1.17]                                                                                                              | 4654   | 4628   | 4821   | 4547   | 5461  | 5490  | 5648  | 5570  | 5240  | 5181  | 5266  | 5201  |
| K02188 cobalt-precorrin-5B (C1)-methyltransferase [EC:2.1.1.195]                                                                                           | 2691   | 2742   | 2441   | 2512   | 2670  | 2616  | 2549  | 2681  | 2627  | 2605  | 2617  | 2604  |
| K02189 cobalt-precorrin 5A hydrolase [EC:3.7.1.12]                                                                                                         | 1400   | 1388   | 1294   | 1422   | 803   | 711   | 690   | 808   | 1327  | 1310  | 1346  | 1356  |
| K02190 sirohydrochlorin cobaltochelatase [EC:4.99.1.3]                                                                                                     | 1394   | 1517   | 1392   | 1537   | 2321  | 2366  | 2446  | 2294  | 2292  | 2211  | 2297  | 2212  |
| K02191 cobalt-precorrin-6B (C15)-methyltransferase [EC:2.1.1.196]                                                                                          | 340    | 336    | 315    | 309    | 219   | 228   | 207   | 224   | 346   | 341   | 319   | 361   |
| K02224 cobyrinic acid a,c-diamide synthase [EC:6.3.5.9 6.3.5.11]                                                                                           | 3600   | 3658   | 3339   | 3466   | 3065  | 2838  | 2823  | 3001  | 3075  | 3041  | 2956  | 3034  |
| K02225 cobalamin biosynthetic protein CobC                                                                                                                 | 1352   | 1390   | 1102   | 1185   | 678   | 657   | 558   | 642   | 424   | 331   | 346   | 395   |
| K02226 alpha-ribazole phosphatase [EC:3.1.3.73]                                                                                                            | 1656   | 1656   | 1589   | 1579   | 1915  | 1876  | 1886  | 1880  | 1761  | 1676  | 1748  | 1696  |
| K02227 adenosylcobinamide-phosphate synthase [EC:6.3.1.10]                                                                                                 | 2266   | 2255   | 2046   | 2109   | 1745  | 1598  | 1468  | 1659  | 1636  | 1659  | 1666  | 1730  |
| K02229 precorrin-3B synthase [EC:1.14.13.83]                                                                                                               | 1437   | 1389   | 1114   | 1231   | 608   | 611   | 628   | 761   | 414   | 366   | 340   | 416   |
| K02230 cobaltochelatase CobN [EC:6.6.1.2]                                                                                                                  | 10190  | 10207  | 9284   | 9685   | 5545  | 5371  | 5200  | 5913  | 3310  | 3008  | 2924  | 3061  |
| K02231 adenosylcobinamide kinase / adenosylcobinamide-phosphate guanylyltransferase [EC:2.7.1.156 2.7.7.62]                                                | 1568   | 1572   | 1478   | 1543   | 1596  | 1572  | 1593  | 1530  | 1548  | 1489  | 1579  | 1625  |
| K02232 adenosylcobyric acid synthase [EC:6.3.5.10]                                                                                                         | 3752   | 3683   | 3480   | 3543   | 2597  | 2595  | 2562  | 2602  | 3047  | 3109  | 2919  | 3026  |
| K02233 adenosylcobinamide-GDP-ribazoletransferase [EC:2.7.8.26]                                                                                            | 2102   | 2147   | 2069   | 2043   | 2459  | 2477  | 2280  | 2476  | 2285  | 2246  | 2388  | 2309  |
| K02234 cobalamin biosynthetic protein CobW                                                                                                                 | 1692   | 1648   | 1506   | 1438   | 853   | 763   | 694   | 727   | 494   | 453   | 419   | 485   |
| K02302 uroporphyrin-III C-methyltransferase / precorrin-2 dehydrogenase / sirohydrochlorin ferrochelatase [EC:2.1.1.107 1.3.1.76 4.99.1.4]                 | 2627   | 2711   | 2438   | 2655   | 1564  | 1675  | 1647  | 1602  | 2539  | 2649  | 2605  | 2650  |
| K02303 uroporphyrin-III C-methyltransferase [EC:2.1.1.107]                                                                                                 | 2540   | 2582   | 2452   | 2542   | 1472  | 1467  | 1417  | 1445  | 812   | 693   | 715   | 777   |
| K02304 precorrin-2 dehydrogenase / sirohydrochlorin ferrochelatase [EC:1.3.1.76 4.99.1.4]                                                                  | 239    | 210    | 208    | 241    | 52    | 59    | 45    | 57    | 227   | 238   | 244   | 246   |
| K02492 glutamyl-tRNA reductase [EC:1.2.1.70]                                                                                                               | 3206   | 3030   | 3076   | 2865   | 1904  | 1693  | 1830  | 1865  | 2167  | 2095  | 2028  | 2120  |
| K02495 oxygen-independent coproporphyrinogen III oxidase [EC:1.3.98.3]                                                                                     | 1933   | 1963   | 2004   | 1974   | 1293  | 1287  | 1341  | 1257  | 1671  | 1782  | 1621  | 1736  |
| K02496 uroporphyrin-III C-methyltransferase [EC:2.1.1.107]                                                                                                 | 2751   | 2649   | 2568   | 2620   | 1636  | 1609  | 1527  | 1599  | 1570  | 1506  | 1495  | 1559  |
| K03394 precorrin-2/cobalt-factor-2 C20-methyltransferase [EC:2.1.1.130 2.1.1.151]                                                                          | 1890   | 1885   | 1725   | 1834   | 978   | 956   | 1001  | 1056  | 1240  | 1266  | 1230  | 1234  |
| K03399 cobalt-precorrin-7 (C5)-methyltransferase [EC:2.1.1.289]                                                                                            | 450    | 366    | 350    | 360    | 244   | 256   | 210   | 208   | 542   | 522   | 497   | 540   |
| K03404 magnesium chelatase subunit D [EC:6.6.1.1]                                                                                                          | 76     | 93     | 95     | 64     | 8     | 4     | 5     | 2     | 82    | 90    | 95    | 121   |
| K03405 magnesium chelatase subunit I [EC:6.6.1.1]                                                                                                          | 356    | 357    | 324    | 316    | 159   | 176   | 190   | 211   | 165   | 136   | 135   | 172   |
| K03594 bacterioferritin [EC:1.16.3.1]                                                                                                                      | 2524   | 2510   | 2698   | 2466   | 2382  | 2384  | 2170  | 2433  | 1866  | 1864  | 1890  | 1780  |
| K04032 ethanolamine utilization cobalamin adenosyltransferase [EC:2.5.1.17]                                                                                | 328    | 275    | 327    | 334    | 83    | 99    | 106   | 107   | 690   | 732   | 654   | 810   |
| K04034 anaerobic magnesium-protoporphyrin IX monomethyl ester cyclase [EC:1.21.98.3]                                                                       | 3      | 1      | 3      | 1      | 1     | 0     | 0     | 0     | 5     | 9     | 5     | 6     |
| K04720 threonine-phosphate decarboxylase [EC:4.1.1.81]                                                                                                     | 1353   | 1439   | 1470   | 1432   | 1879  | 1811  | 1959  | 1945  | 2207  | 2261  | 2235  | 2173  |
| K05895 precorrin-6A/cobalt-precorrin-6A reductase [EC:1.3.1.54 1.3.1.106]                                                                                  | 1412   | 1332   | 1208   | 1373   | 745   | 731   | 710   | 796   | 1056  | 1057  | 988   | 1052  |
| K05934 precorrin-3B C17-methyltransferase [EC:2.1.1.131]                                                                                                   | 600    | 600    | 558    | 583    | 319   | 314   | 339   | 343   | 769   | 812   | 699   | 788   |
| K05936 precorrin-4/cobalt-precorrin-4 C11-methyltransferase [EC:2.1.1.133 2.1.1.271]                                                                       | 1988   | 1775   | 1744   | 1825   | 954   | 955   | 888   | 930   | 1301  | 1257  | 1141  | 1277  |
| K06042 precorrin-8X/cobalt-precorrin-8 methyltransferase [EC:5.4.99.61 5.4.99.60]                                                                          | 1366   | 1374   | 1266   | 1262   | 562   | 610   | 627   | 659   | 988   | 882   | 972   | 1090  |
| K07145 heme oxygenase (staphylobilin-producing) [EC:1.14.99.48]                                                                                            | 1      | 0      | 0      | 0      | 0     | 0     | 0     | 0     | 0     | 0     | 0     | 0     |
| K07215 heme oxygenase (biliverdin-IX-beta and delta-forming) [EC:1.14.99.58]                                                                               | 684    | 709    | 666    | 685    | 327   | 384   | 342   | 342   | 247   | 227   | 192   | 196   |
| K08260 adenosylcobinamide hydrolase [EC:3.5.1.90]                                                                                                          | 1      | 2      | 2      | 2      | 1     | 0     | 0     | 0     | 4     | 2     | 11    | 6     |
| K09882 cobaltochelatase CobS [EC:6.6.1.2]                                                                                                                  | 34     | 46     | 44     | 54     | 33    | 20    | 31    | 43    | 69    | 66    | 45    | 74    |
| K09883 cobaltochelatase CobT [EC:6.6.1.2]                                                                                                                  | 1      | 0      | 0      | 0      | 2     | 2     | 0     | 0     | 5     | 3     | 3     | 4     |
| K13541 cobalt-precorrin 5A hydrolase / precorrin-3B C17-methyltransferase [EC:3.7.1.12 2.1.1.131]                                                          | 1939   | 1966   | 1599   | 1746   | 881   | 948   | 956   | 1098  | 599   | 540   | 495   | 528   |
| K13542 uroporphyrinogen III methyltransferase / synthase [EC:2.1.1.107 4.2.1.75]                                                                           | 678    | 632    | 641    | 639    | 131   | 162   | 167   | 132   | 708   | 756   | 724   | 866   |
| K13543 uroporphyrinogen III methyltransferase / synthase [EC:2.1.1.107 4.2.1.75]                                                                           | 34     | 39     | 44     | 45     | 42    | 30    | 51    | 67    | 57    | 51    | 57    | 50    |
| K13786 cob(II)yrinic acid a,c-diamide reductase [EC:1.16.8.1]                                                                                              | 2      | 0      | 0      | 0      | 0     | 0     | 0     | 2     | 3     | 0     | 2     | 1     |
| K16651 L-threonine kinase [EC:2.7.1.177]                                                                                                                   | 593    | 507    | 552    | 534    | 379   | 351   | 383   | 398   | 736   | 731   | 658   | 786   |
| K19221 cob(I)alamine adenosyltransferase [EC:2.5.1.17]                                                                                                     | 940    | 858    | 927    | 976    | 430   | 440   | 437   | 449   | 910   | 920   | 893   | 966   |
| K19712 adenosylcobinamide-phosphate guanylyltransferase [EC:2.7.7.62]                                                                                      | 0      | 2      | 2      | 1      | 0     | 0     | 0     | 0     | 2     | 2     | 3     | 1     |
| K21479 cobalt-factor III methyltransferase [EC:2.1.1.272]                                                                                                  | 1      | 0      | 0      | 0      | 0     | 0     | 0     | 5     | 0     | 0     | 0     | 0     |
| K21480 heme oxygenase (biliverdin-producing, ferredoxin) [EC:1.14.15.20]                                                                                   | 1      | 0      | 0      | 0      |       |       |       |       |       |       |       |       |

|                                                                                                                                                         |        |        |        |        |        |        |        |        |        |        |        |        |
|---------------------------------------------------------------------------------------------------------------------------------------------------------|--------|--------|--------|--------|--------|--------|--------|--------|--------|--------|--------|--------|
| K06127 2-methoxy-6-polyprenyl-1,4-benzoquinol methylase [EC:2.1.1.201]                                                                                  | 1      | 0      | 0      | 0      | 2      | 0      | 1      | 3      | 0      | 0      | 0      | 0      |
| K06134 3-demethoxyubiquinol 3-hydroxylase [EC:1.14.99.60]                                                                                               | 770    | 762    | 781    | 739    | 454    | 457    | 470    | 411    | 257    | 249    | 259    | 219    |
| K06800 2-succinyl-6-hydroxy-2,4-cyclohexadiene-1-carboxylate synthase [EC:4.2.99.20]                                                                    | 520    | 525    | 477    | 506    | 284    | 302    | 311    | 302    | 632    | 697    | 627    | 674    |
| K11782 chorismate dehydratase [EC:4.2.1.151]                                                                                                            | 9      | 8      | 5      | 5      | 7      | 11     | 3      | 6      | 5      | 5      | 5      | 7      |
| K11783 futasoline hydrolase [EC:3.2.2.26]                                                                                                               | 2      | 3      | 2      | 1      | 3      | 4      | 3      | 0      | 7      | 7      | 4      | 8      |
| K11784 cyclic dehydropanthinyl futasoline synthase [EC:1.21.98.1]                                                                                       | 7      | 2      | 10     | 8      | 5      | 18     | 8      | 2      | 10     | 15     | 6      | 14     |
| K11785 1,4-dihydroxy-6-naphthoate synthase [EC:1.14.-.-]                                                                                                | 3      | 5      | 9      | 3      | 3      | 10     | 5      | 13     | 18     | 11     | 8      | 11     |
| K18285 aminodeoxyfutasoline synthase [EC:2.5.1.120]                                                                                                     | 19     | 5      | 9      | 9      | 3      | 11     | 9      | 7      | 12     | 19     | 13     | 15     |
| K18286 aminodeoxyfutasoline deaminase [EC:3.5.4.40]                                                                                                     | 1      | 2      | 2      | 1      | 0      | 0      | 0      | 0      | 0      | 0      | 0      | 0      |
| K18800 2-polyprenylphenol 6-hydroxylase [EC:1.14.13.240]                                                                                                | 3061   | 3005   | 2822   | 2994   | 1750   | 1682   | 1716   | 1760   | 1871   | 1709   | 1746   | 1833   |
| K19222 1,4-dihydroxy-2-naphthol-CoA hydrolase [EC:3.1.2.28]                                                                                             | 884    | 927    | 750    | 855    | 504    | 472    | 466    | 523    | 539    | 492    | 490    | 534    |
| K19267 NAD(P)H dehydrogenase (quinone) [EC:1.6.5.2]                                                                                                     | 481    | 519    | 494    | 596    | 333    | 434    | 443    | 396    | 752    | 814    | 697    | 796    |
| K20810 aminodeoxyfutasoline deaminase [EC:3.5.4.40]                                                                                                     | 1      | 0      | 0      | 0      | 1      | 1      | 0      | 0      | 0      | 0      | 0      | 1      |
| Metabolism of terpenoids and polyketides                                                                                                                | 154125 | 153253 | 148955 | 151067 | 124182 | 123608 | 122819 | 122769 | 130332 | 129860 | 127856 | 130163 |
| ko00900 Terpenoid backbone biosynthesis                                                                                                                 | 46655  | 47022  | 46688  | 46804  | 47838  | 47169  | 47643  | 47051  | 44876  | 45329  | 45135  | 44698  |
| K00021 hydroxymethylglutaryl-CoA reductase (NADPH) [EC:1.1.1.34]                                                                                        | 0      | 0      | 0      | 0      | 0      | 0      | 0      | 0      | 2      | 10     | 3      | 9      |
| K00054 hydroxymethylglutaryl-CoA reductase [EC:1.1.1.88]                                                                                                | 63     | 55     | 59     | 51     | 8      | 18     | 5      | 7      | 64     | 75     | 75     | 66     |
| K00099 1-deoxy-D-xylulose-5-phosphate reductoisomerase [EC:1.1.1.267]                                                                                   | 3978   | 4155   | 4145   | 4129   | 4369   | 4365   | 4375   | 4273   | 4072   | 4161   | 4110   | 4079   |
| K00795 farnesyl diphosphate synthase [EC:2.5.1.1 2.5.1.10]                                                                                              | 584    | 611    | 556    | 619    | 505    | 469    | 444    | 417    | 816    | 909    | 835    | 873    |
| K00805 heptaprenyl diphosphate synthase [EC:2.5.1.30]                                                                                                   | 351    | 403    | 389    | 348    | 107    | 85     | 69     | 98     | 330    | 370    | 427    | 397    |
| K00806 undecaprenyl diphosphate synthase [EC:2.5.1.31]                                                                                                  | 2035   | 2016   | 2098   | 2092   | 2578   | 2639   | 2695   | 2553   | 2507   | 2686   | 2570   | 2686   |
| K00869 mevalonate kinase [EC:2.7.1.36]                                                                                                                  | 75     | 49     | 52     | 58     | 26     | 16     | 15     | 10     | 53     | 94     | 76     | 68     |
| K00919 4-diphosphocytidyl-2-C-methyl-D-erythritol kinase [EC:2.7.1.148]                                                                                 | 2604   | 2616   | 2691   | 2541   | 2838   | 2750   | 2710   | 2558   | 2734   | 2690   | 2845   | 2647   |
| K00938 phosphomevalonate kinase [EC:2.7.4.2]                                                                                                            | 62     | 67     | 70     | 68     | 24     | 16     | 19     | 18     | 82     | 104    | 75     | 87     |
| K00951 2-C-methyl-D-erythritol 4-phosphate cytidylyltransferase [EC:2.7.7.60]                                                                           | 2549   | 2397   | 2531   | 2609   | 2428   | 2371   | 2597   | 2526   | 2422   | 2523   | 2344   | 2422   |
| K01597 diphosphomevalonate decarboxylase [EC:4.1.1.33]                                                                                                  | 49     | 79     | 58     | 61     | 17     | 10     | 13     | 16     | 52     | 78     | 73     | 73     |
| K01770 2-C-methyl-D-erythritol 2,4-cyclodiphosphate synthase [EC:4.6.1.12]                                                                              | 1547   | 1699   | 1652   | 1685   | 1777   | 1782   | 1705   | 1610   | 1765   | 1652   | 1719   | 1719   |
| K01823 isopentenyl-diphosphate Delta-isomerase [EC:5.3.3.2]                                                                                             | 436    | 490    | 434    | 506    | 261    | 294    | 302    | 286    | 631    | 695    | 621    | 606    |
| K02523 octaprenyl-diphosphate synthase [EC:2.5.1.90]                                                                                                    | 2606   | 2446   | 2653   | 2517   | 3389   | 3610   | 3615   | 3531   | 3009   | 2964   | 3020   | 2948   |
| K03526 (E)-4-hydroxy-3-methylbut-2-en-yl-diphosphate synthase [EC:1.17.7.1 1.17.7.3]                                                                    | 4251   | 4405   | 4447   | 4420   | 6126   | 6050   | 6161   | 5977   | 5224   | 4958   | 5337   | 4994   |
| K03527 4-hydroxy-3-methylbut-2-en-1-yl diphosphate reductase [EC:1.17.7.4]                                                                              | 2847   | 2824   | 2873   | 2679   | 3256   | 3123   | 3159   | 3158   | 3313   | 3252   | 3240   | 3215   |
| K06013 STE24 endopeptidase [EC:3.4.24.84]                                                                                                               | 9      | 4      | 2      | 3      | 9      | 9      | 11     | 7      | 4      | 5      | 10     | 13     |
| K06981 isopentenyl phosphate kinase [EC:2.7.4.26]                                                                                                       | 0      | 3      | 3      | 0      | 1      | 0      | 0      | 1      | 2      | 6      | 8      | 4      |
| K12506 2-C-methyl-D-erythritol 4-phosphate cytidylyltransferase / 2-C-methyl-D-erythritol 2,4-cyclodiphosphate synthase [EC:2.7.7.60 4.6.1.12]          | 63     | 60     | 63     | 70     | 62     | 72     | 67     | 99     | 90     | 77     | 85     | 77     |
| K13787 geranylgeranyl diphosphate synthase, type I [EC:2.5.1.1 2.5.1.10 2.5.1.29]                                                                       | 11     | 9      | 11     | 16     | 10     | 7      | 7      | 6      | 31     | 20     | 21     | 23     |
| K13789 geranylgeranyl diphosphate synthase, type II [EC:2.5.1.1 2.5.1.10 2.5.1.29]                                                                      | 2253   | 2148   | 2200   | 2235   | 2812   | 2752   | 2832   | 2709   | 2146   | 2176   | 2251   | 2226   |
| K15888 tritans,polycis-undecaprenyl-diphosphate synthase [geranylgeranyl-diphosphate specific] [EC:2.5.1.89]                                            | 1      | 1      | 0      | 0      | 2      | 2      | 0      | 0      | 5      | 3      | 3      | 10     |
| K12173 trans,polycis-polyisoprenyl diphosphate synthase [EC:2.5.1.88]                                                                                   | 1      | 0      | 1      | 0      | 0      | 1      | 0      | 0      | 0      | 0      | 0      | 0      |
| ko00902 Monoterpenoid biosynthesis                                                                                                                      | 1      | 0      | 0      | 0      | 0      | 0      | 0      | 0      | 0      | 1      | 0      | 0      |
| K15095 (+)-neomenthol dehydrogenase [EC:1.1.1.208]                                                                                                      | 1      | 0      | 0      | 0      | 0      | 0      | 0      | 0      | 0      | 0      | 0      | 0      |
| K23232 8-hydroxygeraniol dehydrogenase [EC:1.1.1.324]                                                                                                   | 0      | 0      | 0      | 0      | 0      | 0      | 0      | 0      | 0      | 1      | 0      | 0      |
| ko00909 Sesquiterpenoid and triterpenoid biosynthesis                                                                                                   | 0      | 0      | 0      | 0      | 0      | 0      | 0      | 0      | 0      | 0      | 0      | 0      |
| K06045 squalene-hopene/tetraprenyl-beta-curcumen cyclase [EC:4.9.9.17 4.2.1.129]                                                                        | 3      | 3      | 2      | 3      | 0      | 0      | 0      | 0      | 0      | 0      | 0      | 0      |
| ko00906 Carotenoid biosynthesis                                                                                                                         | 29     | 53     | 60     | 56     | 43     | 55     | 56     | 50     | 125    | 101    | 88     | 98     |
| K02291 15-cis-phytoene synthase [EC:2.5.1.32]                                                                                                           | 10     | 16     | 12     | 25     | 14     | 20     | 18     | 20     | 42     | 37     | 26     | 34     |
| K09835 polycopene isomerase [EC:5.2.1.13]                                                                                                               | 1      | 0      | 2      | 2      | 0      | 0      | 0      | 0      | 1      | 1      | 3      | 1      |
| K10027 phytoene desaturase [EC:1.3.99.26 1.3.99.28 1.3.99.29 1.3.99.31]                                                                                 | 14     | 24     | 35     | 25     | 24     | 35     | 32     | 27     | 72     | 53     | 55     | 54     |
| K10210 diapolycopene oxygenase [EC:1.14.99.44]                                                                                                          | 2      | 6      | 5      | 3      | 0      | 0      | 6      | 3      | 6      | 2      | 2      | 6      |
| K10211 4,4'-diaponeurosporenoate glycosyltransferase [EC:4.2.4.1.-]                                                                                     | 0      | 5      | 4      | 1      | 0      | 0      | 0      | 0      | 4      | 0      | 2      | 2      |
| K10212 glycosyl-4,4'-diaponeurosporenoate acyltransferase [EC:2.3.1.-]                                                                                  | 2      | 2      | 2      | 0      | 5      | 0      | 0      | 0      | 0      | 4      | 0      | 1      |
| K15746 beta-carotene 3-hydroxylase [EC:1.14.15.24]                                                                                                      | 0      | 0      | 0      | 0      | 0      | 0      | 0      | 0      | 0      | 4      | 0      | 0      |
| ko00981 Insect hormone biosynthesis                                                                                                                     | 5102   | 5084   | 4807   | 4818   | 3106   | 2867   | 2785   | 3017   | 1916   | 1755   | 1686   | 1825   |
| K14938 cholesterol 7-desaturase [EC:1.14.19.12]                                                                                                         | 0      | 0      | 0      | 0      | 0      | 0      | 0      | 0      | 0      | 1      | 0      | 0      |
| ko00908 Zeatin biosynthesis                                                                                                                             | 3123   | 3207   | 3387   | 3217   | 5160   | 5000   | 5206   | 4962   | 4225   | 4307   | 4377   | 4260   |
| K00791 tRNA dimethylallyltransferase [EC:2.5.1.75]                                                                                                      | 3123   | 3207   | 3387   | 3217   | 5160   | 5000   | 5206   | 4962   | 4225   | 4307   | 4377   | 4260   |
| ko00903 Limonene and pinene degradation                                                                                                                 | 16698  | 16373  | 16025  | 16123  | 9818   | 9523   | 9105   | 9778   | 8914   | 8576   | 8466   | 9038   |
| K14731 epsilon-lactone hydrolase [EC:3.1.1.83]                                                                                                          | 92     | 97     | 120    | 106    | 24     | 27     | 52     | 33     | 118    | 121    | 151    | 167    |
| ko00281 Geraniol degradation                                                                                                                            | 32077  | 31388  | 30074  | 30983  | 17949  | 17595  | 16844  | 17810  | 15019  | 14526  | 14201  | 14848  |
| K11731 citronellyl-CoA dehydrogenase [EC:1.3.99.-]                                                                                                      | 1806   | 1704   | 1660   | 1740   | 939    | 903    | 941    | 923    | 511    | 506    | 498    | 480    |
| K13775 citronellol/citronellal dehydrogenase                                                                                                            | 849    | 907    | 840    | 831    | 449    | 471    | 408    | 457    | 280    | 260    | 252    | 275    |
| K13775 citronellol/citronellal dehydrogenase                                                                                                            | 1202   | 1233   | 1030   | 1152   | 659    | 603    | 543    | 642    | 388    | 373    | 421    | 352    |
| K13776 citronellyl-CoA synthetase [EC:6.2.1.-]                                                                                                          | 2534   | 2508   | 2308   | 2469   | 1315   | 1348   | 1220   | 1343   | 794    | 764    | 691    | 764    |
| K13777 geranyl-CoA carboxylase alpha subunit [EC:6.4.1.5]                                                                                               | 2904   | 2884   | 2601   | 2663   | 1520   | 1451   | 1323   | 1417   | 892    | 864    | 787    | 827    |
| K13778 geranyl-CoA carboxylase beta subunit [EC:6.4.1.5]                                                                                                | 2360   | 2282   | 2336   | 2284   | 1279   | 1250   | 1202   | 1241   | 726    | 681    | 668    | 638    |
| K13779 isohexenylglutacetyl-CoA hydratase [EC:4.2.1.57]                                                                                                 | 818    | 731    | 646    | 765    | 407    | 391    | 378    | 481    | 286    | 228    | 200    | 254    |
| ko01052 Type I polyketide structures                                                                                                                    | 0      | 1      | 1      | 0      | 1      | 1      | 2      | 5      | 7      | 7      | 8      | 2      |
| K16378 piceolate-incorporating enzyme                                                                                                                   | 0      | 0      | 0      | 0      | 0      | 1      | 2      | 3      | 4      | 6      | 8      | 1      |
| K16384 polyene macrolide polyketide synthase                                                                                                            | 0      | 0      | 0      | 0      | 1      | 0      | 0      | 1      | 2      | 0      | 0      | 1      |
| K16395 epothilone synthetase B                                                                                                                          | 0      | 1      | 1      | 0      | 0      | 0      | 0      | 0      | 1      | 1      | 0      | 0      |
| K16397 epothilone polyketide synthase D                                                                                                                 | 0      | 0      | 0      | 0      | 0      | 0      | 0      | 1      | 0      | 0      | 0      | 0      |
| ko01051 Biosynthesis of ansamycins                                                                                                                      | 13517  | 13414  | 13461  | 13442  | 9604   | 9691   | 9778   | 9303   | 14442  | 14290  | 14105  | 14499  |
| ko01059 Biosynthesis of enediyne antibiotics                                                                                                            | 0      | 0      | 0      | 0      | 0      | 0      | 0      | 0      | 0      | 0      | 0      | 1      |
| K15320 6-methylsalicylic acid synthase [EC:2.3.1.165]                                                                                                   | 0      | 0      | 0      | 0      | 0      | 0      | 0      | 0      | 0      | 0      | 0      | 1      |
| ko01056 Biosynthesis of type II polyketide backbone                                                                                                     | 2      | 1      | 0      | 0      | 0      | 0      | 0      | 2      | 2      | 1      | 0      | 1      |
| K12420 ketoreductase [EC:1.1.1.-]                                                                                                                       | 2      | 1      | 0      | 0      | 0      | 0      | 0      | 0      | 2      | 1      | 0      | 1      |
| ko01057 Biosynthesis of type II polyketide products                                                                                                     | 0      | 0      | 0      | 0      | 0      | 0      | 0      | 0      | 0      | 1      | 0      | 0      |
| K05556 ketoreductase RD1 [EC:1.1.1.-]                                                                                                                   | 0      | 0      | 0      | 0      | 0      | 0      | 0      | 0      | 0      | 1      | 0      | 0      |
| ko00253 Tetracycline biosynthesis                                                                                                                       | 857    | 898    | 977    | 897    | 3124   | 3092   | 3110   | 3055   | 2340   | 2086   | 2325   | 2189   |
| K18221 tetracycline 11a-monoxygenase, tetracycline resistance protein [EC:1.14.13.231]                                                                  | 855    | 897    | 977    | 897    | 3124   | 3092   | 3110   | 3055   | 2338   | 2085   | 2325   | 2188   |
| ko00523 Polyketide sugar unit biosynthesis                                                                                                              | 14902  | 15109  | 15013  | 14959  | 16606  | 17024  | 17232  | 16617  | 13995  | 14146  | 13887  | 13846  |
| K00067 dTDP-4-dehydrorhamnose reductase [EC:1.1.1.133]                                                                                                  | 4197   | 4324   | 4281   | 4273   | 4572   | 4728   | 4685   | 4483   | 3463   | 3571   | 3423   | 3316   |
| K00973 glucose-1-phosphate thymidyltransferase [EC:2.7.7.24]                                                                                            | 4335   | 4362   | 4461   | 4283   | 5425   | 5406   | 5669   | 5509   | 4932   | 4888   | 4972   | 4998   |
| K01710 dTDP-glucose 4,6-dehydratase [EC:4.2.1.46]                                                                                                       | 4263   | 4310   | 4172   | 4262   | 4525   | 4735   | 4663   | 4518   | 3965   | 4125   | 3926   | 3887   |
| K01790 dTDP-4-dehydrorhamnose 3,5-epimerase [EC:5.1.3.13]                                                                                               | 2099   | 2103   | 2089   | 2123   | 2084   | 2149   | 2213   | 2106   | 1619   | 1546   | 1541   | 1629   |
| K13315 NDP-hexose C3-ketoreductase / dTDP-4-oxo-2-deoxy-alpha-D-pentos-2-ene 2,3-reductase [EC:1.1.1.-]                                                 | 6      | 5      | 6      | 10     | 0      | 0      | 0      | 0      | 3      | 4      | 3      | 5      |
| K13327 dTDP-3,4-didehydro-2,6-dideoxy-alpha-D-glucose 3-reductase [EC:1.1.1.384]                                                                        | 0      | 0      | 0      | 3      | 0      | 0      | 0      | 0      | 3      | 0      | 2      | 0      |
| K13328 dTDP-4-dehydro-2,6-dideoxy-D-glucose 3-dehydratase [EC:4.2.1.164]                                                                                | 0      | 0      | 0      | 0      | 0      | 0      | 0      | 1      | 0      | 0      | 0      | 0      |
| K16435 dTDP-4-dehydro-6-deoxy-alpha-D-glucopyranose 2,3-dehydratase [EC:4.2.1.159]                                                                      | 0      | 3      | 2      | 3      | 0      | 4      | 0      | 0      | 3      | 5      | 8      | 3      |
| K16436 dTDP-3-amino-2,3,6-trideoxy-4-keto-D-glucose/dTDP-3-amino-3,4,6-trideoxy-alpha-D-glucose/dTDP-2,6-dideoxy-D-kanosamine transaminase [EC:2.6.2.3] | 0      | 2      | 0      | 2      | 0      | 2      | 0      | 0      | 0      | 0      | 0      | 1      |
| K23144 UDP-N-acetylglucosamine diphosphorylase / glucose-1-phosphate thymidyltransferase / UDP-N-acetylglactosamine diphosphorylase / glucosaminidase   | 2      | 0      | 2      | 0      | 0      | 0      | 2      | 0      | 7      | 7      | 12     | 7      |
| ko01054 Nonribosomal peptide structures                                                                                                                 | 545    | 573    | 494    | 584    | 430    | 483    | 410    | 398    | 391    | 459    | 418    | 429    |
| K15654 surfactin family lipopeptide synthetase A                                                                                                        | 1      | 1      | 1      | 0      | 0      | 1      | 0      | 0      | 2      | 1      | 0      | 3      |
| K15655 surfactin family lipopeptide synthetase B                                                                                                        | 0      | 0      | 0      | 0      | 0      | 0      | 0      | 0      | 2      | 1      | 0      | 1      |
| K15656 surfactin family lipopeptide synthetase C                                                                                                        | 3      | 0      | 0      | 1      | 0      | 0      | 0      | 0      | 0      | 0      | 0      | 0      |
| K15662 iturin family lipopeptide synthetase B                                                                                                           | 2      | 2      | 2      | 3      | 1      | 0      | 0      | 0      | 1      | 5      | 3      | 3      |
| K15664 fengycin family lipopeptide synthetase A                                                                                                         | 0      | 0      | 0      | 0      | 0      | 0      | 0      | 0      | 0      | 1      | 0      | 0      |
| K15665 fengycin family lipopeptide synthetase B                                                                                                         | 0      | 1      | 0      | 1      | 0      | 0      | 0      | 0      | 1      | 2      | 1      | 1      |
| K15667 fengycin family lipopeptide synthetase D                                                                                                         | 1      | 0      | 0      | 0      | 0      | 0      | 0      | 0      | 1      | 0      | 0      | 0      |
| K15668 fengycin family lipopeptide synthetase E                                                                                                         | 0      | 0      | 0      | 0      | 0      | 0      | 0      | 0      | 0      | 0      | 0      | 1      |
| K16093 bacitracin synthase 1                                                                                                                            | 1      | 2      | 1      | 1      | 1      | 0      | 0      | 0      | 4      | 5      |        |        |

|                                                                                         |        |        |        |        |        |        |        |        |        |        |        |        |
|-----------------------------------------------------------------------------------------|--------|--------|--------|--------|--------|--------|--------|--------|--------|--------|--------|--------|
| K04788 mycobactin phenyloxazoline synthetase                                            | 56     | 51     | 54     | 40     | 18     | 23     | 45     | 36     | 10     | 11     | 7      | 13     |
| K04792 mycobactin peptide synthetase MbtF                                               | 0      | 0      | 0      | 0      | 0      | 0      | 0      | 0      | 0      | 0      | 0      | 1      |
| K12238 pyochelin biosynthesis protein PchD                                              | 2623   | 2311   | 2267   | 2387   | 1293   | 1242   | 1170   | 1312   | 802    | 711    | 660    | 743    |
| K12239 dihydroaeruginosic acid synthetase                                               | 2557   | 2576   | 2172   | 2273   | 1306   | 1227   | 1234   | 1445   | 850    | 675    | 692    | 790    |
| K12240 pyochelin synthetase                                                             | 7108   | 6939   | 6050   | 6098   | 3437   | 3387   | 3113   | 3701   | 2465   | 2153   | 2021   | 2271   |
| K12241 pyochelin biosynthetic protein PchG                                              | 1668   | 1568   | 1308   | 1356   | 791    | 762    | 724    | 912    | 513    | 522    | 443    | 419    |
| ko01055 Biosynthesis of vancomycin group antibiotics                                    | 4263   | 4315   | 4174   | 4267   | 4526   | 4742   | 4663   | 4518   | 3969   | 4130   | 3934   | 3891   |
| K16428 nonribosomal peptide synthetase CepA                                             | 0      | 0      | 0      | 0      | 1      | 1      | 0      | 0      | 1      | 0      | 0      | 0      |
| Biosynthesis of other secondary metabolites                                             | 190903 | 190852 | 192732 | 191796 | 233503 | 232484 | 235180 | 231851 | 217484 | 215139 | 217005 | 214577 |
| ko00940 Phenylpropanoid biosynthesis                                                    | 32196  | 33340  | 34471  | 33540  | 71230  | 70199  | 72603  | 70003  | 65143  | 64596  | 66190  | 63984  |
| K12355 cinneryl-aldehyde dehydrogenase [EC:1.2.1.68]                                    | 0      | 0      | 0      | 0      | 0      | 0      | 0      | 1      | 0      | 0      | 0      | 0      |
| K20039 phenacrylate decarboxylase [EC:4.1.1.102]                                        | 1      | 0      | 0      | 0      | 0      | 0      | 0      | 2      | 0      | 0      | 0      | 0      |
| ko00944 Flavone and flavonol biosynthesis                                               | 2965   | 2979   | 3153   | 3092   | 7622   | 7568   | 7800   | 7477   | 7097   | 6746   | 7115   | 6902   |
| ko00901 Indole alkaloid biosynthesis                                                    | 0      | 1      | 0      | 0      | 0      | 0      | 0      | 0      | 0      | 0      | 0      | 0      |
| ko00950 Isoquinoline alkaloid biosynthesis                                              | 10701  | 10860  | 10839  | 10806  | 10253  | 10109  | 10199  | 10350  | 10541  | 10532  | 10374  | 10532  |
| ko00960 Tropane, piperidine and pyridine alkaloid biosynthesis                          | 22018  | 22019  | 22162  | 22222  | 20537  | 20411  | 20343  | 20144  | 21829  | 21745  | 21503  | 21807  |
| K08088 homosperrmidine synthase [EC:2.5.1.44]                                           | 1853   | 1903   | 2132   | 2044   | 1112   | 1128   | 1049   | 1047   | 632    | 622    | 648    | 573    |
| K08081 tropinone reductase I [EC:1.1.1.206]                                             | 1      | 0      | 0      | 0      | 0      | 0      | 0      | 0      | 0      | 0      | 0      | 0      |
| K13607 cinnamoyl-CoA:phenyllactate CoA-transferase [EC:2.8.3.17]                        | 9      | 5      | 5      | 9      | 1      | 5      | 0      | 0      | 4      | 9      | 5      | 7      |
| K19064 lysine 6-dehydrogenase [EC:1.4.1.18]                                             | 0      | 0      | 0      | 4      | 0      | 0      | 0      | 1      | 4      | 3      | 2      | 4      |
| ko00232 Caffeine metabolism                                                             | 0      | 2      | 0      | 0      | 0      | 0      | 0      | 0      | 0      | 0      | 0      | 0      |
| ko00965 Betalain biosynthesis                                                           | 1718   | 1703   | 1494   | 1617   | 930    | 975    | 830    | 922    | 1039   | 1035   | 1005   | 963    |
| K15777 4,5-DOPA dioxygenase extradiol [EC:1.13.11.-]                                    | 1718   | 1702   | 1494   | 1617   | 930    | 975    | 830    | 922    | 1039   | 1035   | 1005   | 963    |
| ko00966 Glucosinolate biosynthesis                                                      | 4521   | 4354   | 4339   | 4552   | 4914   | 5049   | 4994   | 4747   | 4882   | 4859   | 4710   | 4855   |
| ko00311 Penicillin and cephalosporin biosynthesis                                       | 8866   | 8634   | 8627   | 8540   | 7640   | 7633   | 7507   | 7599   | 5580   | 5068   | 5180   | 5221   |
| K01060 cephalosporin-C deacetylase [EC:3.1.1.41]                                        | 124    | 150    | 136    | 154    | 88     | 95     | 70     | 91     | 66     | 62     | 64     | 63     |
| K01434 penicillin amidase [EC:3.5.1.11]                                                 | 7230   | 6914   | 6660   | 6777   | 3698   | 3620   | 3556   | 3726   | 226    | 1970   | 1884   | 2099   |
| K17826 beta-lactamase class A [EC:3.5.2.6]                                              | 1501   | 1561   | 1824   | 1604   | 3845   | 3906   | 3872   | 3772   | 3243   | 3030   | 3224   | 3054   |
| K19200 isopenicillin-N N-acyltransferase like protein                                   | 11     | 9      | 7      | 5      | 9      | 12     | 9      | 10     | 10     | 6      | 8      | 5      |
| ko00332 Carbapenem biosynthesis                                                         | 6736   | 6670   | 6770   | 6805   | 8230   | 7978   | 8443   | 8404   | 7958   | 7776   | 8258   | 8066   |
| ko00261 Monobactam biosynthesis                                                         | 30837  | 30802  | 31277  | 31199  | 35977  | 36067  | 36221  | 35656  | 34760  | 34734  | 34737  | 34241  |
| K05375 MbtH protein                                                                     | 314    | 276    | 266    | 317    | 152    | 125    | 131    | 157    | 111    | 96     | 80     | 106    |
| ko00521 Streptomycin biosynthesis                                                       | 33159  | 33370  | 33617  | 33510  | 39818  | 40498  | 40907  | 40356  | 38527  | 38516  | 38430  | 38505  |
| ko00524 Neomycin, kanamycin and gentamicin biosynthesis                                 | 5641   | 5770   | 5818   | 5761   | 10192  | 10337  | 10553  | 10631  | 9141   | 9227   | 9378   | 9288   |
| ko00525 Acarbose and validamycin biosynthesis                                           | 8600   | 8672   | 8635   | 8545   | 9951   | 10141  | 10334  | 10028  | 8904   | 9020   | 8913   | 8892   |
| K19974 2-epi-5-epi-valiolone 7-phosphate 2-epimerase [EC:5.1.3.35]                      | 0      | 0      | 0      | 0      | 0      | 0      | 0      | 1      | 0      | 0      | 0      | 0      |
| K20437 validoxylamine A 7'-phosphate phosphatase [EC:3.1.3.101]                         | 0      | 0      | 0      | 0      | 1      | 0      | 0      | 0      | 0      | 0      | 3      | 0      |
| ko00401 Novobioicin biosynthesis                                                        | 16959  | 16987  | 17235  | 17013  | 19343  | 19151  | 19422  | 19056  | 17369  | 17133  | 17252  | 17320  |
| ko00404 Staurosporine biosynthesis                                                      | 1      | 0      | 0      | 2      | 0      | 0      | 0      | 0      | 0      | 0      | 0      | 0      |
| K14266 tryptophan 7-halogenase [EC:1.14.19.9]                                           | 1      | 0      | 0      | 2      | 0      | 0      | 0      | 0      | 0      | 0      | 0      | 0      |
| ko00405 Phenazine biosynthesis                                                          | 23666  | 23152  | 22957  | 22726  | 16136  | 15901  | 15484  | 16081  | 11436  | 10981  | 10783  | 10955  |
| K06998 trans-2,3-dihydro-3-hydroxyanthranilate isomerase [EC:5.3.3.17]                  | 208    | 153    | 160    | 144    | 257    | 276    | 265    | 225    | 4      | 7      | 5      | 3      |
| K13063 2-amino-4-deoxychorismate synthase [EC:2.6.1.86]                                 | 2265   | 2135   | 2010   | 2043   | 1114   | 1129   | 1062   | 1184   | 653    | 703    | 660    | 646    |
| K17940 2-heptyl-3-hydroxy-4(1H)-quinolone synthase [EC:1.14.13.182]                     | 566    | 565    | 591    | 550    | 336    | 273    | 287    | 293    | 167    | 157    | 180    | 167    |
| K18000 anthranilate-CoA ligase [EC:6.2.1.32]                                            | 2371   | 2396   | 2409   | 2415   | 1474   | 1327   | 1240   | 1360   | 770    | 690    | 666    | 807    |
| K18001 2-heptyl-4(1H)-quinolone synthase subunit PqsB [EC:2.3.1.230]                    | 1422   | 1379   | 1447   | 1388   | 807    | 804    | 765    | 850    | 463    | 410    | 445    | 413    |
| K18002 2-heptyl-4(1H)-quinolone synthase subunit PqsC [EC:2.3.1.230]                    | 1481   | 1476   | 1555   | 1402   | 864    | 810    | 828    | 821    | 478    | 463    | 453    | 426    |
| K18003 anthraniloyl-CoA anthraniloyltransferase [EC:2.3.1.262]                          | 1711   | 1526   | 1560   | 1526   | 918    | 868    | 807    | 885    | 515    | 514    | 449    | 474    |
| K20257 2-aminobenzoyletyl-CoA thioesterase [EC:3.1.2.32]                                | 272    | 265    | 248    | 260    | 136    | 135    | 149    | 166    | 79     | 89     | 123    | 82     |
| K20260 phenazine biosynthesis protein                                                   | 1399   | 1332   | 1291   | 1318   | 722    | 720    | 624    | 819    | 407    | 464    | 384    | 441    |
| K20261 trans-2,3-dihydro-3-hydroxyanthranilic acid synthase [EC:3.3.2.15]               | 812    | 892    | 774    | 807    | 448    | 423    | 459    | 434    | 297    | 243    | 217    | 277    |
| K20262 dihydrophenazinedicarboxylate synthase [EC:4.5.4.16]                             | 542    | 526    | 459    | 447    | 256    | 242    | 243    | 256    | 153    | 136    | 115    | 134    |
| K20940 5-methylphenazine-1-carboxylate 1-monoxygenase [EC:1.14.13.218]                  | 1944   | 1773   | 1695   | 1788   | 1012   | 988    | 948    | 1026   | 591    | 551    | 573    | 536    |
| K21103 phenazine-1-carboxylate N-methyltransferase [EC:2.1.1.327]                       | 3      | 5      | 2      | 5      | 2      | 3      | 3      | 3      | 2      | 2      | 0      | 0      |
| ko00333 Prodigiosin biosynthesis                                                        | 18169  | 17674  | 17798  | 17780  | 14987  | 14646  | 14658  | 14869  | 13904  | 13766  | 13798  | 13809  |
| ko00254 Aflatoxin biosynthesis                                                          | 0      | 1      | 0      | 0      | 0      | 0      | 0      | 0      | 0      | 0      | 0      | 0      |
| ko00998 Biosynthesis of secondary metabolites - other antibiotics                       | 1602   | 1539   | 1528   | 1680   | 1581   | 1563   | 1563   | 1682   | 1555   | 1506   | 1587   | 1594   |
| K19548 dihydroantcapsin dehydrogenase [EC:1.1.1.385]                                    | 0      | 0      | 0      | 1      | 0      | 0      | 0      | 0      | 0      | 1      | 0      | 1      |
| K21721 N-[(2S)-2-amino-2-carboxyethyl]-L-glutamate dehydrogenase [EC:1.5.1.51]          | 5      | 6      | 10     | 6      | 57     | 62     | 52     | 54     | 13     | 10     | 15     | 23     |
| ko00999 Biosynthesis of secondary metabolites - unclassified                            | 25     | 51     | 31     | 37     | 97     | 120    | 81     | 91     | 46     | 35     | 59     | 75     |
| Xenobiotics biodegradation and metabolism                                               | 199531 | 197852 | 190839 | 196157 | 142449 | 142050 | 138282 | 143945 | 152281 | 150905 | 148117 | 152118 |
| ko00362 Benzoate degradation                                                            | 70270  | 69863  | 66855  | 68977  | 44700  | 44506  | 43305  | 45274  | 55403  | 54819  | 53560  | 56141  |
| K00448 protocatechuate 3,4-dioxygenase, alpha subunit [EC:1.13.11.3]                    | 737    | 762    | 660    | 790    | 327    | 316    | 308    | 372    | 628    | 607    | 537    | 626    |
| K00449 protocatechuate 3,4-dioxygenase, beta subunit [EC:1.13.11.3]                     | 721    | 633    | 618    | 649    | 313    | 290    | 285    | 278    | 653    | 605    | 622    | 668    |
| K00481 p-hydroxybenzoate 3-monoxygenase [EC:1.14.13.2]                                  | 1919   | 937    | 924    | 986    | 413    | 399    | 411    | 394    | 1075   | 1205   | 1125   | 1166   |
| K01031 3-oxoadipate CoA-transferase, alpha subunit [EC:2.8.3.6]                         | 227    | 233    | 224    | 237    | 62     | 72     | 78     | 76     | 483    | 467    | 480    | 498    |
| K01032 3-oxoadipate CoA-transferase, beta subunit [EC:2.8.3.6]                          | 232    | 203    | 203    | 236    | 52     | 54     | 50     | 62     | 490    | 484    | 465    | 471    |
| K01055 3-oxoadipate enol-lactonase [EC:3.1.1.24]                                        | 2533   | 2579   | 2441   | 2533   | 1371   | 1420   | 1303   | 1544   | 1404   | 1278   | 1265   | 1360   |
| K01607 4-carboxymuconolactone decarboxylase [EC:4.1.1.44]                               | 2843   | 2945   | 2818   | 2956   | 3284   | 3509   | 3411   | 3366   | 4000   | 3821   | 3975   | 3897   |
| K01821 4-oxalocrotonate tautomerase [EC:5.3.2.6]                                        | 286    | 247    | 234    | 251    | 150    | 177    | 206    | 194    | 206    | 221    | 217    | 220    |
| K01856 muconate cycloisomerase [EC:5.5.1.1]                                             | 1916   | 1833   | 1716   | 1885   | 888    | 867    | 798    | 906    | 1370   | 1326   | 1303   | 1316   |
| K01857 3-carboxy-cis,cis-muconate cycloisomerase [EC:5.5.1.2]                           | 2839   | 2790   | 2531   | 2662   | 1457   | 1398   | 1324   | 1481   | 1532   | 1502   | 1398   | 1626   |
| K03381 catechol 1,2-dioxygenase [EC:1.13.11.1]                                          | 1027   | 979    | 895    | 903    | 462    | 441    | 418    | 451    | 811    | 823    | 753    | 885    |
| K03464 muconolactone D-isomerase [EC:5.3.3.4]                                           | 530    | 514    | 524    | 509    | 248    | 269    | 214    | 282    | 383    | 382    | 338    | 377    |
| K04108 4-hydroxybenzoyl-CoA reductase subunit alpha [EC:1.3.7.9]                        | 4      | 6      | 4      | 5      | 1      | 3      | 1      | 1      | 4      | 1      | 2      | 1      |
| K04116 cyclohexanecarboxylate-CoA ligase [EC:6.2.1.-]                                   | 4      | 0      | 1      | 0      | 0      | 0      | 1      | 0      | 2      | 8      | 4      | 0      |
| K05549 benzoate/toluate 1,2-dioxygenase subunit alpha [EC:1.14.12.10 1.14.12.-]         | 2308   | 2308   | 2172   | 2153   | 1056   | 1027   | 953    | 1069   | 1568   | 1568   | 1504   | 1603   |
| K05550 benzoate/toluate 1,2-dioxygenase subunit beta [EC:1.14.12.10 1.14.12.-]          | 924    | 904    | 755    | 851    | 426    | 421    | 395    | 474    | 546    | 519    | 569    | 560    |
| K05783 dihydrocyclohexadiene carboxylate dehydrogenase [EC:1.3.1.25 1.3.1.-]            | 1165   | 1103   | 1003   | 1077   | 439    | 486    | 480    | 532    | 758    | 705    | 684    | 804    |
| K05784 benzoate/toluate 1,2-dioxygenase reductase component [EC:1.13.11.-]              | 1819   | 1665   | 1768   | 1794   | 920    | 866    | 763    | 911    | 1109   | 1109   | 1124   | 1222   |
| K07104 catechol 2,3-dioxygenase [EC:1.13.11.2]                                          | 98     | 104    | 107    | 110    | 21     | 23     | 21     | 18     | 64     | 131    | 102    | 116    |
| K07535 2-hydroxycyclohexanecarboxyl-CoA dehydrogenase [EC:1.1.1.-]                      | 1      | 2      | 2      | 1      | 0      | 0      | 0      | 0      | 9      | 1      | 0      | 2      |
| K07536 2-ketocyclohexanecarboxyl-CoA hydrolase [EC:3.1.2.-]                             | 0      | 0      | 0      | 0      | 0      | 0      | 0      | 0      | 0      | 1      | 0      | 0      |
| K07823 3-oxoadipyl-CoA thiolase [EC:2.3.1.174]                                          | 2241   | 2106   | 2116   | 2080   | 1212   | 1157   | 1123   | 1234   | 728    | 638    | 661    | 731    |
| K14333 2,3-dihydroxybenzoate decarboxylase [EC:4.1.1.46]                                | 401    | 428    | 378    | 390    | 112    | 131    | 104    | 105    | 879    | 837    | 755    | 875    |
| K16173 glutaryl-CoA dehydrogenase (non-decarboxylating) [EC:1.3.99.32]                  | 1      | 0      | 0      | 0      | 0      | 0      | 0      | 0      | 0      | 0      | 0      | 0      |
| K16514 4-oxalomesaconate tautomerase [EC:5.3.2.8]                                       | 464    | 485    | 481    | 501    | 127    | 142    | 141    | 143    | 852    | 918    | 870    | 929    |
| K16515 4-oxalomesaconate hydratase [EC:4.2.1.83]                                        | 171    | 350    | 297    | 342    | 95     | 68     | 87     | 96     | 609    | 666    | 664    | 689    |
| K18365 4-hydroxy-2-oxovalerate/4-hydroxy-2-oxohexanoate aldolase [EC:4.1.3.39 4.1.3.43] | 0      | 0      | 0      | 0      | 0      | 0      | 0      | 0      | 1      | 0      | 0      | 0      |
| K19066 cyclohex-1-ene-1-carboxyl-CoA dehydrogenase [EC:1.3.8.10]                        | 0      | 0      | 0      | 0      | 0      | 0      | 0      | 0      | 1      | 3      | 0      | 1      |
| K19067 cyclohexane-1-carboxyl-CoA dehydrogenase [EC:1.3.8.11]                           | 0      | 0      | 2      | 2      | 0      | 0      | 0      | 2      | 0      | 0      | 1      | 0      |
| ko00627 Aminobenzoate degradation                                                       | 28705  | 28147  | 25968  | 27495  | 15633  | 15452  | 14431  | 15936  | 15093  | 14652  | 14286  | 15017  |
| K00141 benzaldehyde dehydrogenase (NAD) [EC:1.2.1.28]                                   | 0      | 0      | 2      | 1      | 0      | 0      | 0      | 0      | 1      | 0      | 3      | 0      |
| K01101 4-nitrophenyl phosphatase [EC:3.1.3.41]                                          | 48     | 62     | 44     | 49     | 163    | 144    | 130    | 153    | 48     | 72     | 71     | 61     |
| K01576 benzoylformate decarboxylase [EC:4.1.1.177]                                      | 2777   | 2649   | 2356   | 2493   | 1388   | 1423   | 1230   | 1496   | 901    | 759    | 726    | 782    |
| K01612 vanillate/4-hydroxybenzoate decarboxylase subunit C [EC:4.1.1.- 4.1.1.61]        | 721    | 697    | 620    | 755    | 537    |        |        |        |        |        |        |        |

|                                                                                                              |        |        |        |        |        |        |        |        |        |        |        |        |
|--------------------------------------------------------------------------------------------------------------|--------|--------|--------|--------|--------|--------|--------|--------|--------|--------|--------|--------|
| ko00623 Toluene degradation                                                                                  | 6114   | 5879   | 5469   | 5807   | 2841   | 2841   | 2570   | 2893   | 5207   | 5255   | 4797   | 5189   |
| K07540 benzylsuccinate synthase [EC:4.1.99.11]                                                               | 0      | 5      | 2      | 0      | 3      | 0      | 0      | 0      | 0      | 0      | 3      | 0      |
| K07546 E-phenylitaconyl-CoA hydratase [EC:4.2.1.-]                                                           | 0      | 0      | 0      | 0      | 0      | 0      | 0      | 1      | 0      | 0      | 0      | 0      |
| K20199 4-hydroxybenzaldehyde dehydrogenase (NADP+) [EC:1.2.1.96]                                             | 1      | 0      | 0      | 0      | 1      | 0      | 0      | 1      | 0      | 0      | 0      | 0      |
| ko00622 Xylene degradation                                                                                   | 9871   | 9674   | 9163   | 9556   | 4523   | 4632   | 4263   | 4765   | 7636   | 7565   | 7427   | 7904   |
| K10619 p-cumate 2,3-dioxygenase subunit alpha [EC:1.14.12.25]                                                | 1712   | 1828   | 1572   | 1686   | 916    | 891    | 805    | 935    | 538    | 464    | 460    | 527    |
| ko00633 Nitrotoluene degradation                                                                             | 6332   | 6311   | 6128   | 6155   | 4941   | 5183   | 5347   | 5250   | 4905   | 5077   | 4827   | 5081   |
| K06281 hydrogenase large subunit [EC:1.12.99.6]                                                              | 537    | 526    | 562    | 504    | 733    | 803    | 760    | 739    | 400    | 415    | 383    | 415    |
| K06282 hydrogenase small subunit [EC:1.12.99.6]                                                              | 357    | 315    | 329    | 370    | 491    | 441    | 472    | 475    | 245    | 255    | 265    | 314    |
| K10678 nitroreductase [EC:1.-.-.-]                                                                           | 464    | 467    | 415    | 442    | 267    | 309    | 305    | 247    | 491    | 580    | 574    | 608    |
| K10679 nitroreductase / dihydropteridine reductase [EC:1.-.-.-.1.5.1.34]                                     | 441    | 456    | 399    | 425    | 353    | 399    | 366    | 352    | 613    | 669    | 593    | 582    |
| K10680 N-ethylmaleimide reductase [EC:1.-.-.-]                                                               | 3703   | 3625   | 3487   | 3532   | 2135   | 2195   | 2304   | 2345   | 1508   | 1370   | 1272   | 1375   |
| ko00642 Ethylbenzene degradation                                                                             | 6773   | 6698   | 6402   | 6637   | 4033   | 3892   | 3923   | 3925   | 3815   | 3726   | 3661   | 3843   |
| ko00643 Styrene degradation                                                                                  | 18851  | 18860  | 17262  | 18375  | 9778   | 9520   | 9073   | 10010  | 9489   | 9345   | 9140   | 9558   |
| K01502 aliphatic nitrilase [EC:3.5.5.7]                                                                      | 0      | 1      | 0      | 0      | 0      | 0      | 0      | 0      | 4      | 6      | 2      | 9      |
| ko00791 Atrazine degradation                                                                                 | 6469   | 6237   | 5767   | 6209   | 4067   | 4011   | 3908   | 4196   | 3783   | 3807   | 3628   | 3940   |
| K03382 hydroxydechloroatrazine ethylaminohydrolase [EC:3.5.4.43]                                             | 35     | 20     | 22     | 35     | 2      | 5      | 3      | 0      | 19     | 28     | 24     | 20     |
| K03383 cyanuric acid amidohydrolase [EC:3.5.2.15]                                                            | 3      | 0      | 0      | 0      | 0      | 0      | 0      | 0      | 0      | 0      | 0      | 0      |
| K19837 1-carboxybiuret hydrolase [EC:3.5.1.131]                                                              | 1      | 0      | 0      | 0      | 0      | 0      | 0      | 0      | 0      | 0      | 0      | 0      |
| K23359 biuret amidohydrolase [EC:3.5.1.84]                                                                   | 9      | 5      | 14     | 12     | 1      | 3      | 2      | 2      | 5      | 6      | 2      | 1      |
| ko00930 Caprolactam degradation                                                                              | 17149  | 16501  | 16484  | 16659  | 9697   | 9599   | 8993   | 9768   | 8999   | 8844   | 8740   | 9199   |
| K06446 acyl-CoA dehydrogenase [EC:1.3.99.-]                                                                  | 1797   | 1620   | 1614   | 1787   | 889    | 907    | 798    | 977    | 573    | 569    | 589    | 532    |
| K17754 cyclopentanol dehydrogenase [EC:1.1.1.163]                                                            | 0      | 0      | 0      | 0      | 0      | 0      | 0      | 0      | 0      | 1      | 0      | 0      |
| K19962 6-oxohexanoate dehydrogenase [EC:1.2.1.63]                                                            | 1      | 0      | 0      | 0      | 0      | 1      | 0      | 0      | 0      | 0      | 0      | 0      |
| ko00363 Bisphenol degradation                                                                                | 861    | 817    | 768    | 864    | 467    | 483    | 480    | 503    | 290    | 239    | 272    | 286    |
| K05913 2,4-dihydroxyacetophenone dioxygenase [EC:1.13.11.41]                                                 | 861    | 817    | 768    | 864    | 467    | 483    | 480    | 503    | 290    | 239    | 272    | 286    |
| ko00621 Dioxin degradation                                                                                   | 1439   | 1383   | 1382   | 1420   | 641    | 783    | 751    | 687    | 2173   | 2181   | 2151   | 2229   |
| K00480 salicylate hydroxylase [EC:1.14.13.1]                                                                 | 1      | 0      | 0      | 1      | 0      | 0      | 0      | 0      | 2      | 3      | 3      | 1      |
| ko00626 Naphthalene degradation                                                                              | 10423  | 10467  | 10613  | 10543  | 6135   | 6295   | 6069   | 6079   | 8427   | 8877   | 8655   | 8530   |
| ko00624 Polycyclic aromatic hydrocarbon degradation                                                          | 1461   | 1395   | 1278   | 1441   | 642    | 606    | 593    | 650    | 1283   | 1263   | 1165   | 1299   |
| ko00365 Furfural degradation                                                                                 | 32     | 44     | 36     | 20     | 1      | 2      | 3      | 4      | 11     | 9      | 7      | 9      |
| K16873 5-(hydroxymethyl)furfural/furfural oxidase [EC:1.1.3.47 1.1.3.-]                                      | 0      | 0      | 0      | 0      | 0      | 0      | 0      | 2      | 0      | 0      | 0      | 0      |
| K16874 2,5-furandicarboxylate decarboxylase 1                                                                | 30     | 44     | 35     | 20     | 1      | 2      | 3      | 2      | 10     | 9      | 7      | 9      |
| K16875 2,5-furandicarboxylate decarboxylase 2                                                                | 1      | 0      | 1      | 0      | 0      | 0      | 0      | 0      | 1      | 0      | 0      | 0      |
| K16880 2-oxoglutaroyl-CoA hydrolase                                                                          | 1      | 0      | 0      | 0      | 0      | 0      | 0      | 0      | 0      | 0      | 0      | 0      |
| ko00984 Steroid degradation                                                                                  | 8      | 2      | 0      | 7      | 0      | 4      | 1      | 2      | 5      | 1      | 4      | 3      |
| K03333 cholesterol oxidase [EC:1.1.3.6]                                                                      | 0      | 0      | 0      | 2      | 0      | 2      | 0      | 0      | 2      | 0      | 1      | 1      |
| K05988 3-oxosteroid 1-dehydrogenase [EC:1.3.99.4]                                                            | 3      | 1      | 0      | 1      | 0      | 0      | 1      | 2      | 2      | 1      | 2      | 1      |
| K16048 3-hydroxy-9,10-secoandrosta-1,3,5[10]-trien-9,17-dione monooxygenase reductase component [EC:1.5.1.-] | 1      | 1      | 0      | 0      | 0      | 1      | 0      | 0      | 0      | 0      | 0      | 0      |
| K16050 4,5,9,10-diseco-3-hydroxy-5,9,17-trioxoandrosta-1[10],2-diene-4-oate hydrolase [EC:3.7.1.17]          | 2      | 0      | 0      | 3      | 0      | 0      | 0      | 0      | 0      | 0      | 0      | 0      |
| K18687 HIP---CoA ligase [EC:6.2.1.41]                                                                        | 1      | 0      | 0      | 0      | 0      | 1      | 0      | 0      | 0      | 0      | 0      | 0      |
| ko00980 Metabolism of xenobiotics by cytochrome P450                                                         | 13914  | 13780  | 13393  | 13756  | 8198   | 8210   | 7931   | 8189   | 9759   | 9639   | 9396   | 9631   |
| K15303 aflatoxin B1 aldehyde reductase                                                                       | 55     | 56     | 49     | 40     | 4      | 8      | 3      | 7      | 97     | 97     | 117    | 103    |
| ko00982 Drug metabolism - cytochrome P450                                                                    | 16397  | 16383  | 15952  | 16301  | 9639   | 9610   | 9235   | 9726   | 10530  | 10392  | 10082  | 10270  |
| ko00983 Drug metabolism - other enzymes                                                                      | 42944  | 42575  | 43326  | 43204  | 48183  | 48290  | 47711  | 47793  | 48778  | 48281  | 48403  | 47848  |
| K05659 thiopurine S-methyltransferase [EC:2.1.1.67]                                                          | 946    | 930    | 910    | 899    | 551    | 523    | 438    | 477    | 310    | 255    | 258    | 286    |
| K01044 carboxylesterase 1 [EC:3.1.1.1]                                                                       | 0      | 0      | 0      | 1      | 0      | 0      | 0      | 0      | 0      | 1      | 0      | 0      |
| K03927 carboxylesterase 2 [EC:3.1.1.1 3.1.1.84 3.1.1.56]                                                     | 0      | 0      | 0      | 0      | 0      | 0      | 0      | 0      | 1      | 0      | 0      | 0      |
| Not included in regular maps                                                                                 |        |        |        |        |        |        |        |        |        |        |        |        |
| ko09113 Global maps only                                                                                     | 3286   | 3287   | 3218   | 3416   | 1938   | 2038   | 1810   | 1973   | 1851   | 1965   | 1844   | 1886   |
| K00528 ferredoxin/flavodoxin---NADP+ reductase [EC:1.18.1.2 1.19.1.1]                                        | 3286   | 3287   | 3218   | 3416   | 1938   | 2038   | 1810   | 1973   | 1851   | 1965   | 1844   | 1886   |
| K08088 fibrial protein FimY                                                                                  | 3105   | 3135   | 3077   | 3251   | 1703   | 1779   | 1580   | 1759   | 1851   | 1965   | 1844   | 1883   |
| Genetic Information Processing                                                                               | 181    | 152    | 141    | 165    | 235    | 259    | 230    | 214    | 0      | 0      | 0      | 3      |
| Transcription                                                                                                | 688494 | 689615 | 696901 | 695431 | 729254 | 736705 | 735480 | 727754 | 712116 | 714939 | 716173 | 713046 |
| Transcription                                                                                                | 27799  | 28114  | 28971  | 28527  | 34261  | 35071  | 34594  | 33772  | 33945  | 34478  | 34784  | 33403  |
| Transcription                                                                                                | 27778  | 28095  | 28948  | 28514  | 34250  | 35071  | 34590  | 33769  | 33902  | 34425  | 34744  | 33346  |
| ko03020 RNA polymerase                                                                                       | 0      | 0      | 0      | 0      | 0      | 0      | 0      | 0      | 2      | 0      | 0      | 0      |
| K02999 DNA-directed RNA polymerase I subunit RPA1 [EC:2.7.7.6]                                               | 0      | 0      | 0      | 0      | 0      | 0      | 0      | 0      | 0      | 0      | 0      | 0      |
| K03002 DNA-directed RNA polymerase I subunit RPA2 [EC:2.7.7.6]                                               | 0      | 2      | 0      | 0      | 0      | 0      | 0      | 0      | 0      | 0      | 0      | 0      |
| K03011 DNA-directed RNA polymerase II subunit RPB3                                                           | 0      | 2      | 0      | 0      | 0      | 0      | 0      | 0      | 0      | 0      | 0      | 0      |
| K03040 DNA-directed RNA polymerase subunit alpha [EC:2.7.7.6]                                                | 3331   | 3411   | 3419   | 3372   | 3946   | 3945   | 3957   | 3979   | 3914   | 3962   | 3948   | 3902   |
| K03041 DNA-directed RNA polymerase subunit A' [EC:2.7.7.6]                                                   | 2      | 0      | 0      | 0      | 3      | 0      | 3      | 3      | 18     | 31     | 13     | 32     |
| K03042 DNA-directed RNA polymerase subunit A [EC:2.7.7.6]                                                    | 2      | 0      | 8      | 0      | 2      | 0      | 0      | 1      | 12     | 16     | 4      | 7      |
| K03043 DNA-directed RNA polymerase subunit beta [EC:2.7.7.6]                                                 | 10872  | 11269  | 11552  | 11363  | 14140  | 14675  | 14483  | 13922  | 13783  | 14025  | 14231  | 13540  |
| K03044 DNA-directed RNA polymerase subunit B' [EC:2.7.7.6]                                                   | 2      | 0      | 2      | 1      | 0      | 0      | 2      | 0      | 4      | 12     | 8      | 15     |
| K03045 DNA-directed RNA polymerase subunit B [EC:2.7.7.6]                                                    | 0      | 1      | 1      | 1      | 0      | 1      | 0      | 2      | 2      | 4      | 8      | 6      |
| K03046 DNA-directed RNA polymerase subunit beta' [EC:2.7.7.6]                                                | 12740  | 12599  | 13223  | 12943  | 15703  | 15944  | 15695  | 15415  | 15625  | 15800  | 15959  | 15315  |
| K03047 DNA-directed RNA polymerase subunit D [EC:2.7.7.6]                                                    | 1      | 2      | 0      | 0      | 0      | 1      | 1      | 0      | 1      | 5      | 2      | 6      |
| K03048 DNA-directed RNA polymerase subunit delta                                                             | 20     | 27     | 11     | 23     | 4      | 5      | 5      | 7      | 24     | 13     | 20     | 27     |
| K03049 DNA-directed RNA polymerase subunit E' [EC:2.7.7.6]                                                   | 0      | 0      | 0      | 1      | 0      | 0      | 0      | 0      | 0      | 7      | 0      | 3      |
| K03050 DNA-directed RNA polymerase subunit E [EC:2.7.7.6]                                                    | 0      | 0      | 0      | 0      | 0      | 0      | 0      | 1      | 1      | 0      | 2      | 1      |
| K03051 DNA-directed RNA polymerase subunit F [EC:2.7.7.6]                                                    | 0      | 0      | 0      | 0      | 0      | 0      | 0      | 1      | 0      | 1      | 3      | 0      |
| K03053 DNA-directed RNA polymerase subunit H [EC:2.7.7.6]                                                    | 0      | 0      | 0      | 0      | 2      | 0      | 2      | 0      | 5      | 4      | 0      | 1      |
| K03055 DNA-directed RNA polymerase subunit K [EC:2.7.7.6]                                                    | 2      | 0      | 0      | 0      | 0      | 0      | 0      | 0      | 3      | 0      | 1      | 1      |
| K03056 DNA-directed RNA polymerase subunit L [EC:2.7.7.6]                                                    | 0      | 0      | 0      | 1      | 0      | 0      | 0      | 0      | 0      | 2      | 2      | 1      |
| K03058 DNA-directed RNA polymerase subunit N [EC:2.7.7.6]                                                    | 0      | 0      | 0      | 0      | 2      | 0      | 0      | 0      | 0      | 0      | 0      | 1      |
| K03059 DNA-directed RNA polymerase subunit P [EC:2.7.7.6]                                                    | 0      | 0      | 0      | 0      | 0      | 0      | 0      | 0      | 0      | 1      | 1      | 1      |
| K03060 DNA-directed RNA polymerase subunit omega [EC:2.7.7.6]                                                | 805    | 781    | 730    | 805    | 447    | 499    | 442    | 437    | 508    | 531    | 538    | 482    |
| K13797 DNA-directed RNA polymerase subunit beta-beta' [EC:2.7.7.6]                                           | 1      | 1      | 0      | 0      | 1      | 0      | 1      | 0      | 1      | 0      | 1      | 0      |
| K13798 DNA-directed RNA polymerase subunit B [EC:2.7.7.6]                                                    | 0      | 0      | 2      | 1      | 0      | 1      | 0      | 0      | 0      | 1      | 3      | 5      |
| ko03022 Basal transcription factors                                                                          | 3      | 2      | 4      | 1      | 11     | 0      | 4      | 3      | 14     | 24     | 10     | 16     |
| K03120 transcription initiation factor TFIID TATA-box-binding protein                                        | 0      | 2      | 0      | 0      | 2      | 0      | 0      | 0      | 3      | 4      | 3      | 3      |
| K03124 transcription initiation factor TFIIB                                                                 | 0      | 0      | 2      | 1      | 3      | 0      | 0      | 0      | 5      | 7      | 3      | 6      |
| K03135 transcription initiation factor TFIID subunit 11                                                      | 0      | 0      | 0      | 0      | 1      | 0      | 0      | 0      | 0      | 0      | 0      | 0      |
| K03136 transcription initiation factor TFIIE subunit alpha                                                   | 0      | 0      | 2      | 0      | 3      | 0      | 0      | 0      | 3      | 4      | 1      | 0      |
| K10844 DNA excision repair protein ERCC-2 [EC:3.6.4.12]                                                      | 3      | 0      | 0      | 0      | 2      | 0      | 4      | 3      | 3      | 9      | 3      | 7      |
| ko03040 Spliceosome                                                                                          | 18     | 17     | 19     | 12     | 0      | 0      | 0      | 0      | 29     | 29     | 30     | 41     |
| K03283 heat shock 70kDa protein 1/2/6/8                                                                      | 0      | 0      | 1      | 0      | 0      | 0      | 0      | 0      | 0      | 0      | 0      | 1      |
| K12733 peptidyl-prolyl cis-trans isomerase-like 1 [EC:5.2.1.8]                                               | 18     | 13     | 17     | 12     | 0      | 0      | 0      | 0      | 29     | 27     | 30     | 39     |
| K12823 ATP-dependent RNA helicase DDX5/DBP2 [EC:3.6.4.13]                                                    | 0      | 1      | 1      | 0      | 0      | 0      | 0      | 0      | 0      | 2      | 0      | 1      |
| K12827 splicing factor 3A subunit 3                                                                          | 0      | 1      | 0      | 0      | 0      | 0      | 0      | 0      | 0      | 0      | 0      | 0      |
| K12856 pre-mRNA-processing factor 8                                                                          | 0      | 2      | 0      | 0      | 0      | 0      | 0      | 0      | 0      | 0      | 0      | 0      |
| Translation                                                                                                  | 231419 | 233704 | 237905 | 236785 | 242947 | 245463 | 245107 | 240471 | 239930 | 242047 | 241466 | 242016 |
| ko03010 Ribosome                                                                                             | 78384  | 79586  | 82698  | 81135  | 88612  | 88928  | 90151  | 86988  | 84998  | 85396  | 85577  | 85767  |
| K02863 large subunit ribosomal protein L1                                                                    | 2408   | 2351   | 2592   | 2524   | 2685   | 2884   | 2814   | 2668   | 2571   | 2730   | 2743   | 2735   |
| K02864 large subunit ribosomal protein L10                                                                   | 1440   | 1481   | 1633   | 1602   | 1914   | 2024   | 1966   | 1858   | 1801   | 1851   | 1798   | 1729   |
| K02865 large subunit ribosomal protein L10Ae                                                                 | 0      | 0      | 0      | 0      | 0      | 0      | 0      | 0      | 0      | 2      | 0      | 0      |
| K02866 large subunit ribosomal protein L10e                                                                  | 0      | 0      | 0      | 0      | 0      | 0      | 0      | 0      | 2      | 6      | 3      | 3      |
| K02867 large subunit ribosomal protein L11                                                                   | 1591   | 1667   | 1685   | 1674   | 1764   | 1771   | 1747   | 1756   | 1766   | 1760   | 1759   | 1733   |
| K02869 large subunit ribosomal protein L12                                                                   | 0      | 0      | 0      | 0      | 0      | 0      | 0      | 1      | 0      | 0      | 0      | 1      |
| K02871 large subunit ribosomal protein L13                                                                   | 1662   | 1700   | 1614   | 1696   | 1833   | 1844   | 1712   | 1764   | 1728   | 1808   | 1830   | 1796   |
| K02874 large subunit ribosomal protein L14                                                                   | 1469   | 1320   | 1396   | 1436   | 1491   | 1581   | 1519   | 1445   | 1482   | 1457   | 1404   | 1498   |
| K02875 large subunit ribosomal protein L14e                                                                  | 0      | 0      | 0      | 0      | 0      | 0      | 0      | 0      | 2      | 1      | 2      | 0      |
| K02876 large subunit ribosomal protein L15                                                                   | 1576   | 1651   | 1688   | 1715   | 1793   | 1799   | 1953   | 1904   | 1737   | 1842   | 1831   | 1831   |
| K02877 large subunit ribosomal protein L15e                                                                  | 0      | 0      | 0      | 1      | 0      | 1      | 0      | 0      | 0      | 6      | 2      | 7      |
| K02878 large subunit ribosomal protein L16                                                                   | 1648   | 1558   | 1642   | 1643   | 1743   | 1865   | 1762   | 1839   | 1733   | 1706   | 1843   | 1807   |
| K02879 large                                                                                                 |        |        |        |        |        |        |        |        |        |        |        |        |

|                                                                                              |        |        |        |        |        |        |        |        |        |        |        |        |
|----------------------------------------------------------------------------------------------|--------|--------|--------|--------|--------|--------|--------|--------|--------|--------|--------|--------|
| K02906 large subunit ribosomal protein L3                                                    | 2422   | 2528   | 2666   | 2514   | 2605   | 2682   | 2652   | 2572   | 2428   | 2222   | 2407   | 2424   |
| K02907 large subunit ribosomal protein L30                                                   | 720    | 677    | 723    | 687    | 723    | 736    | 728    | 763    | 704    | 736    | 693    | 751    |
| K02908 large subunit ribosomal protein L30e                                                  | 0      | 0      | 0      | 0      | 0      | 0      | 0      | 1      | 2      | 0      | 0      | 5      |
| K02909 large subunit ribosomal protein L31                                                   | 1479   | 1511   | 1535   | 1459   | 1428   | 1386   | 1325   | 1296   | 1325   | 1355   | 1276   | 1246   |
| K02910 large subunit ribosomal protein L31e                                                  | 0      | 0      | 0      | 0      | 0      | 0      | 0      | 0      | 2      | 0      | 2      | 1      |
| K02911 large subunit ribosomal protein L32                                                   | 615    | 620    | 672    | 679    | 736    | 785    | 777    | 747    | 762    | 662    | 739    | 767    |
| K02912 large subunit ribosomal protein L32e                                                  | 0      | 2      | 0      | 0      | 0      | 2      | 0      | 3      | 4      | 6      | 0      | 3      |
| K02913 large subunit ribosomal protein L33                                                   | 577    | 649    | 656    | 666    | 636    | 660    | 692    | 608    | 555    | 628    | 653    | 641    |
| K02914 large subunit ribosomal protein L34                                                   | 519    | 553    | 519    | 516    | 535    | 544    | 611    | 611    | 523    | 522    | 551    | 560    |
| K02915 large subunit ribosomal protein L34e                                                  | 2      | 0      | 0      | 0      | 0      | 0      | 0      | 0      | 2      | 0      | 0      | 1      |
| K02916 large subunit ribosomal protein L35                                                   | 561    | 629    | 650    | 576    | 641    | 668    | 681    | 653    | 561    | 639    | 627    | 639    |
| K02919 large subunit ribosomal protein L36                                                   | 876    | 781    | 783    | 888    | 689    | 704    | 714    | 680    | 649    | 654    | 690    | 696    |
| K02921 large subunit ribosomal protein L37Ae                                                 | 0      | 0      | 0      | 0      | 0      | 0      | 0      | 0      | 0      | 2      | 1      | 4      |
| K02922 large subunit ribosomal protein L37e                                                  | 1      | 0      | 0      | 1      | 0      | 0      | 0      | 0      | 0      | 0      | 0      | 0      |
| K02924 large subunit ribosomal protein L39e                                                  | 0      | 0      | 0      | 0      | 0      | 0      | 0      | 0      | 0      | 0      | 1      | 1      |
| K02925 large subunit ribosomal protein L3e                                                   | 0      | 0      | 2      | 0      | 0      | 0      | 0      | 0      | 0      | 0      | 0      | 0      |
| K02926 large subunit ribosomal protein L4                                                    | 1580   | 1777   | 1733   | 1774   | 2221   | 2155   | 2306   | 2168   | 2291   | 2242   | 2276   | 2211   |
| K02927 large subunit ribosomal protein L40e                                                  | 0      | 0      | 0      | 1      | 0      | 0      | 0      | 0      | 0      | 0      | 0      | 0      |
| K02929 large subunit ribosomal protein L44e                                                  | 1      | 0      | 0      | 0      | 0      | 1      | 0      | 0      | 0      | 0      | 0      | 0      |
| K02930 large subunit ribosomal protein L4e                                                   | 0      | 2      | 0      | 0      | 1      | 2      | 0      | 0      | 4      | 13     | 2      | 5      |
| K02931 large subunit ribosomal protein L5                                                    | 2074   | 2130   | 2145   | 2160   | 2287   | 2503   | 2277   | 2328   | 2283   | 2398   | 2251   | 2311   |
| K02933 large subunit ribosomal protein L6                                                    | 1988   | 2022   | 2134   | 2056   | 2398   | 2359   | 2380   | 2238   | 2135   | 2095   | 2264   | 2030   |
| K02935 large subunit ribosomal protein L7/L12                                                | 1405   | 1452   | 1385   | 1414   | 1499   | 1579   | 1484   | 1286   | 1447   | 1424   | 1454   | 1451   |
| K02936 large subunit ribosomal protein L7Ae                                                  | 0      | 0      | 0      | 0      | 0      | 0      | 0      | 0      | 1      | 8      | 1      | 2      |
| K02939 large subunit ribosomal protein L9                                                    | 1565   | 1528   | 1625   | 1664   | 1731   | 1765   | 1842   | 1787   | 1639   | 1731   | 1682   | 1704   |
| K02942 large subunit ribosomal protein LP1                                                   | 0      | 1      | 0      | 0      | 0      | 0      | 0      | 0      | 0      | 0      | 0      | 0      |
| K02944 large subunit ribosomal protein LV                                                    | 1      | 0      | 0      | 1      | 0      | 0      | 0      | 0      | 0      | 0      | 0      | 4      |
| K02945 small subunit ribosomal protein S1                                                    | 5297   | 5553   | 5571   | 5476   | 6499   | 6100   | 6274   | 6259   | 6058   | 5901   | 6041   | 5817   |
| K02946 small subunit ribosomal protein S10                                                   | 1122   | 1208   | 1283   | 1176   | 1339   | 1210   | 1344   | 1192   | 1259   | 1272   | 1334   | 1320   |
| K02948 small subunit ribosomal protein S11                                                   | 1380   | 1422   | 1511   | 1437   | 1624   | 1650   | 1636   | 1590   | 1580   | 1585   | 1512   | 1511   |
| K02950 small subunit ribosomal protein S12                                                   | 1453   | 1585   | 1598   | 1651   | 1590   | 1616   | 1545   | 1608   | 1565   | 1594   | 1694   | 1688   |
| K02952 small subunit ribosomal protein S13                                                   | 1414   | 1417   | 1475   | 1412   | 1529   | 1551   | 1600   | 1449   | 1437   | 1450   | 1426   | 1471   |
| K02954 small subunit ribosomal protein S14                                                   | 1149   | 1177   | 1261   | 1209   | 1234   | 1272   | 1236   | 1221   | 1210   | 1203   | 1182   | 1189   |
| K02956 small subunit ribosomal protein S15                                                   | 888    | 988    | 981    | 1024   | 1127   | 1017   | 1091   | 1126   | 1045   | 1049   | 997    | 1020   |
| K02957 small subunit ribosomal protein S15Ae                                                 | 0      | 0      | 0      | 0      | 0      | 0      | 0      | 0      | 0      | 0      | 0      | 1      |
| K02958 small subunit ribosomal protein S15e                                                  | 0      | 0      | 0      | 0      | 1      | 0      | 0      | 0      | 0      | 0      | 0      | 0      |
| K02959 small subunit ribosomal protein S16                                                   | 985    | 973    | 1145   | 996    | 1233   | 1259   | 1265   | 1267   | 1088   | 973    | 1166   | 1189   |
| K02961 small subunit ribosomal protein S17                                                   | 889    | 887    | 1090   | 982    | 1083   | 1119   | 1151   | 1021   | 1037   | 1097   | 1045   | 1062   |
| K02962 small subunit ribosomal protein S17e                                                  | 0      | 2      | 1      | 0      | 0      | 0      | 0      | 0      | 0      | 2      | 0      | 1      |
| K02963 small subunit ribosomal protein S18                                                   | 947    | 1005   | 1069   | 1049   | 1040   | 1078   | 1139   | 1115   | 988    | 984    | 997    | 1097   |
| K02965 small subunit ribosomal protein S19                                                   | 1047   | 1114   | 1156   | 1082   | 1191   | 1151   | 1111   | 1113   | 1245   | 1217   | 1150   | 1202   |
| K02966 small subunit ribosomal protein S19e                                                  | 1      | 0      | 0      | 3      | 0      | 0      | 0      | 0      | 0      | 5      | 2      | 1      |
| K02967 small subunit ribosomal protein S2                                                    | 2361   | 2530   | 2496   | 2533   | 2993   | 2977   | 3183   | 2906   | 2881   | 2807   | 2899   | 2836   |
| K02968 small subunit ribosomal protein S20                                                   | 861    | 849    | 910    | 796    | 1084   | 1025   | 1104   | 1033   | 813    | 915    | 949    | 925    |
| K02970 small subunit ribosomal protein S21                                                   | 738    | 727    | 741    | 758    | 842    | 717    | 877    | 856    | 950    | 946    | 860    | 875    |
| K02974 small subunit ribosomal protein S24e                                                  | 0      | 0      | 0      | 0      | 0      | 0      | 0      | 0      | 0      | 0      | 0      | 1      |
| K02977 small subunit ribosomal protein S27Ae                                                 | 0      | 2      | 0      | 0      | 0      | 0      | 0      | 0      | 0      | 1      | 1      | 1      |
| K02978 small subunit ribosomal protein S27e                                                  | 0      | 0      | 0      | 0      | 0      | 2      | 0      | 0      | 0      | 0      | 0      | 0      |
| K02979 small subunit ribosomal protein S28e                                                  | 0      | 0      | 0      | 1      | 0      | 0      | 0      | 0      | 1      | 4      | 2      | 3      |
| K02982 small subunit ribosomal protein S3                                                    | 2646   | 2621   | 2896   | 2758   | 2817   | 2979   | 2892   | 2890   | 2876   | 2768   | 2823   | 2881   |
| K02984 small subunit ribosomal protein S3Ae                                                  | 0      | 0      | 0      | 0      | 0      | 2      | 0      | 0      | 0      | 5      | 7      | 10     |
| K02986 small subunit ribosomal protein S4                                                    | 2416   | 2453   | 2472   | 2458   | 2697   | 2637   | 2661   | 2736   | 2594   | 2622   | 2467   | 2552   |
| K02987 small subunit ribosomal protein S4e                                                   | 5      | 1      | 0      | 1      | 2      | 0      | 0      | 0      | 11     | 6      | 2      | 2      |
| K02988 small subunit ribosomal protein S5                                                    | 1862   | 1807   | 2030   | 2022   | 2011   | 2083   | 2176   | 2003   | 1938   | 1903   | 1886   | 1967   |
| K02990 small subunit ribosomal protein S6                                                    | 1218   | 1223   | 1222   | 1202   | 1237   | 1233   | 1292   | 1298   | 1183   | 1195   | 1283   | 1276   |
| K02991 small subunit ribosomal protein S6e                                                   | 2      | 0      | 0      | 0      | 0      | 0      | 0      | 0      | 0      | 4      | 0      | 3      |
| K02992 small subunit ribosomal protein S7                                                    | 1658   | 1621   | 1658   | 1635   | 1876   | 1882   | 1883   | 1920   | 1931   | 1854   | 1953   | 1873   |
| K02994 small subunit ribosomal protein S8                                                    | 1525   | 1527   | 1555   | 1578   | 1731   | 1655   | 1777   | 1640   | 1566   | 1600   | 1600   | 1567   |
| K02995 small subunit ribosomal protein S8e                                                   | 1      | 0      | 2      | 0      | 0      | 0      | 0      | 0      | 0      | 2      | 0      | 6      |
| K02996 small subunit ribosomal protein S9                                                    | 1533   | 1417   | 1460   | 1452   | 1554   | 1528   | 1650   | 1521   | 1496   | 1496   | 1456   | 1573   |
| K07590 large subunit ribosomal protein L7A                                                   | 14     | 18     | 17     | 19     | 16     | 8      | 18     | 9      | 24     | 26     | 22     | 29     |
| ko00970 Aminoacyl-tRNA biosynthesis                                                          | 142167 | 143005 | 144509 | 144727 | 143932 | 146276 | 144845 | 143047 | 144532 | 146340 | 145552 | 145840 |
| K01866 tyrosyl-tRNA synthetase [EC:6.1.1.1]                                                  | 6742   | 6605   | 6727   | 6974   | 6388   | 6321   | 6459   | 6334   | 5664   | 5665   | 5753   | 5770   |
| K01867 tryptophanyl-tRNA synthetase [EC:6.1.1.2]                                             | 3614   | 3622   | 3676   | 3711   | 3792   | 4023   | 4044   | 4030   | 4428   | 4742   | 4735   | 4608   |
| K01868 threonyl-tRNA synthetase [EC:6.1.1.3]                                                 | 6660   | 6655   | 7015   | 6994   | 6974   | 6942   | 6936   | 6609   | 7203   | 7560   | 7247   | 7437   |
| K01869 leucyl-tRNA synthetase [EC:6.1.1.4]                                                   | 9583   | 9582   | 9705   | 9565   | 10668  | 10848  | 10592  | 10552  | 10301  | 10537  | 10280  | 10063  |
| K01870 isoleucyl-tRNA synthetase [EC:6.1.1.5]                                                | 10289  | 10379  | 10980  | 10790  | 11304  | 11532  | 11439  | 11340  | 10797  | 10641  | 10720  | 10544  |
| K01872 alanyl-tRNA synthetase [EC:6.1.1.7]                                                   | 9066   | 9219   | 9137   | 9110   | 9633   | 9766   | 9737   | 9506   | 9083   | 9105   | 9340   | 9507   |
| K01873 valyl-tRNA synthetase [EC:6.1.1.9]                                                    | 9179   | 8897   | 9059   | 9315   | 7199   | 7385   | 7188   | 7018   | 7897   | 7971   | 7694   | 8077   |
| K01875 seryl-tRNA synthetase [EC:6.1.1.11]                                                   | 4363   | 4409   | 4466   | 4443   | 4674   | 4740   | 4702   | 4674   | 4469   | 4824   | 4691   | 4769   |
| K01876 aspartyl-tRNA synthetase [EC:6.1.1.12]                                                | 5602   | 5653   | 5659   | 5922   | 4487   | 4708   | 4525   | 4545   | 4669   | 4751   | 4821   | 4732   |
| K01878 glycyl-tRNA synthetase alpha chain [EC:6.1.1.14]                                      | 2497   | 2510   | 2409   | 2488   | 1531   | 1499   | 1458   | 1493   | 1542   | 1541   | 1603   | 1523   |
| K01879 glycyl-tRNA synthetase beta chain [EC:6.1.1.14]                                       | 5273   | 5390   | 5062   | 5278   | 3211   | 3377   | 3074   | 3328   | 3368   | 3520   | 3394   | 3562   |
| K01880 glycyl-tRNA synthetase [EC:6.1.1.14]                                                  | 2009   | 1953   | 2101   | 2054   | 3947   | 4053   | 3875   | 3831   | 3549   | 3258   | 3509   | 3352   |
| K01881 prolyl-tRNA synthetase [EC:6.1.1.15]                                                  | 5371   | 5276   | 5451   | 5584   | 4901   | 5020   | 4916   | 4819   | 5372   | 5524   | 5216   | 5467   |
| K01883 cysteinyl-tRNA synthetase [EC:6.1.1.16]                                               | 4181   | 4270   | 4450   | 4306   | 5064   | 5226   | 4883   | 5016   | 4914   | 4708   | 4919   | 4899   |
| K01886 glutamyl-tRNA synthetase [EC:6.1.1.18]                                                | 5316   | 5378   | 5480   | 5444   | 5606   | 5793   | 5776   | 5569   | 5269   | 5325   | 5470   | 5239   |
| K01887 arginyl-tRNA synthetase [EC:6.1.1.19]                                                 | 6214   | 6256   | 6241   | 6249   | 7091   | 7075   | 6708   | 6915   | 6311   | 6389   | 6285   | 6315   |
| K01889 phenylalanyl-tRNA synthetase alpha chain [EC:6.1.1.20]                                | 3043   | 3223   | 3267   | 3119   | 3450   | 3369   | 3418   | 3400   | 3250   | 3406   | 3288   | 3315   |
| K01890 phenylalanyl-tRNA synthetase beta chain [EC:6.1.1.20]                                 | 7083   | 6995   | 7352   | 7149   | 7961   | 7927   | 7809   | 7840   | 7446   | 7653   | 7654   | 7474   |
| K01892 histidyl-tRNA synthetase [EC:6.1.1.21]                                                | 4269   | 4468   | 4612   | 4493   | 4784   | 4923   | 4876   | 4876   | 4404   | 4574   | 4406   | 4337   |
| K01893 asparagyl-tRNA synthetase [EC:6.1.1.22]                                               | 2827   | 2850   | 2953   | 2865   | 4053   | 4108   | 4264   | 3926   | 4302   | 4435   | 4302   | 4279   |
| K02433 aspartyl-tRNA(Asn)/glutamyl-tRNA(Gln) amidotransferase subunit A [EC:6.3.5.6 6.3.5.7] | 3038   | 2913   | 2942   | 2974   | 1487   | 1489   | 1511   | 1571   | 1644   | 1777   | 1588   | 1823   |
| K02434 aspartyl-tRNA(Asn)/glutamyl-tRNA(Gln) amidotransferase subunit B [EC:6.3.5.6 6.3.5.7] | 1873   | 1908   | 1765   | 1871   | 1007   | 978    | 1039   | 1096   | 1222   | 1275   | 1235   | 1285   |
| K02435 aspartyl-tRNA(Asn)/glutamyl-tRNA(Gln) amidotransferase subunit C [EC:6.3.5.6 6.3.5.7] | 572    | 584    | 589    | 576    | 335    | 312    | 324    | 307    | 320    | 347    | 330    | 354    |
| K03330 glutamyl-tRNA(Gln) amidotransferase subunit E [EC:6.3.5.7]                            | 2      | 2      | 3      | 0      | 0      | 4      | 3      | 2      | 18     | 16     | 19     | 14     |
| K04566 lysyl-tRNA synthetase, class I [EC:6.1.1.6]                                           | 70     | 55     | 78     | 80     | 17     | 23     | 13     | 19     | 119    | 180    | 138    | 160    |
| K04567 lysyl-tRNA synthetase, class II [EC:6.1.1.6]                                          | 5796   | 5870   | 5768   | 5831   | 6175   | 6230   | 6497   | 6310   | 7141   | 6987   | 7010   | 7076   |
| K09482 glutamyl-tRNA(Gln) amidotransferase subunit D [EC:6.3.5.7]                            | 2      | 0      | 0      | 0      | 0      | 1      | 0      | 0      | 13     | 14     | 13     | 8      |
| K09698 nondiscriminating glutamyl-tRNA synthetase [EC:6.1.1.24]                              | 171    | 178    | 159    | 173    | 57     | 59     | 57     | 53     | 235    | 263    | 279    | 268    |
| K09759 nondiscriminating aspartyl-tRNA synthetase [EC:6.1.1.23]                              | 501    | 406    | 439    | 455    | 126    | 109    | 108    | 119    | 607    | 529    | 580    | 606    |
| K11627 pyrrolysyl-tRNA synthetase [EC:6.1.1.26]                                              | 0      | 0      | 0      | 0      | 0      | 0      | 0      | 0      | 0      | 0      | 0      | 1      |
| K14164 glycyl-tRNA synthetase [EC:6.1.1.14]                                                  | 0      | 0      | 0      | 0      | 1      | 0      | 0      | 0      | 0      | 0      | 0      | 0      |
| ko03013 RNA transport                                                                        | 6412   | 6540   | 6301   | 6264   | 5983   | 5863   | 5904   | 5942   | 6316   | 6304   | 6250   | 6427   |
| K00784 ribonuclease Z [EC:3.1.26.11]                                                         | 1950   | 1994   | 1984   | 1970   | 2651   | 2610   | 2667   | 2549   | 3011   | 2983   | 2929   | 3015   |
| K00974 tRNA nucleotidyltransferase (CCA-adding enzyme) [EC:2.7.7.2 3.1.3.- 3.1.4.-]          | 3378   | 3396   | 3247   | 3271   | 2040   | 1991   | 1921   | 2029   | 2262   | 2277   | 2269   | 2303   |
| K03113 translation initiation factor 1                                                       | 1068   | 1131   | 1058   | 1015   | 1286   | 1257   | 1307   | 1356   | 1015   | 975    | 1021   | 1049   |
| K03231 elongation factor 1-alpha                                                             | 0      | 3      | 3      | 0      | 2      | 0      | 0      | 0      | 2      | 11     | 3      | 12     |
| K03236 translation initiation factor 1A                                                      | 0      | 0      | 1      | 0      | 0      | 0      | 0      | 0      | 2      | 1      | 3      | 5      |
| K03237 translation initiation factor 2 subunit 1                                             | 0      | 0      | 0      | 1      | 0      | 1      | 2      | 0      | 4      | 1      | 0      | 4      |
| K03238 translation initiation factor 2 subunit 2                                             | 0      | 0      | 0      | 0      | 0      |        |        |        |        |        |        |        |

|                                                                                                            |        |        |        |        |        |        |        |        |        |        |        |        |   |
|------------------------------------------------------------------------------------------------------------|--------|--------|--------|--------|--------|--------|--------|--------|--------|--------|--------|--------|---|
| K15544 RNA polymerase II subunit A C-terminal domain phosphatase SSU72 [EC:3.1.3.16]                       | 0      | 1      | 0      | 0      | 0      | 0      | 0      | 0      | 0      | 0      | 0      | 0      | 0 |
| ko03008 Ribosome biogenesis in eukaryotes                                                                  | 4458   | 4574   | 4392   | 4658   | 4420   | 4395   | 4203   | 4494   | 4083   | 4013   | 4087   | 3976   |   |
| K03264 translation initiation factor 6                                                                     | 4      | 2      | 0      | 0      | 0      | 0      | 2      | 0      | 5      | 10     | 5      | 6      |   |
| K03685 ribonuclease III [EC:3.1.26.3]                                                                      | 2267   | 2346   | 2291   | 2492   | 3097   | 3097   | 3018   | 3174   | 2861   | 2793   | 2859   | 2738   |   |
| K06943 nucleolar GTP-binding protein                                                                       | 0      | 2      | 0      | 1      | 2      | 0      | 0      | 0      | 2      | 7      | 1      | 9      |   |
| K07178 RIO kinase 1 [EC:2.7.11.1]                                                                          | 1020   | 1090   | 964    | 1024   | 567    | 572    | 522    | 600    | 361    | 339    | 346    | 318    |   |
| K11130 H/ACA ribonucleoprotein complex subunit 3                                                           | 0      | 0      | 0      | 0      | 0      | 1      | 0      | 1      | 0      | 0      | 2      | 1      |   |
| K11131 H/ACA ribonucleoprotein complex subunit 4 [EC:5.4.99.-]                                             | 0      | 0      | 0      | 0      | 0      | 0      | 2      | 0      | 0      | 14     | 5      | 9      |   |
| K13288 oligoribonuclease [EC:3.1.-.-]                                                                      | 1165   | 1127   | 1135   | 1141   | 747    | 718    | 656    | 712    | 844    | 816    | 854    | 864    |   |
| K14536 ribosome assembly protein 1 [EC:3.6.5.-]                                                            | 0      | 0      | 0      | 0      | 2      | 0      | 0      | 0      | 0      | 0      | 2      | 0      |   |
| K14538 nuclear GTP-binding protein                                                                         | 0      | 0      | 2      | 0      | 0      | 0      | 0      | 0      | 0      | 0      | 0      | 0      |   |
| K14550 U3 small nucleolar RNA-associated protein 10                                                        | 0      | 0      | 0      | 0      | 3      | 0      | 0      | 0      | 0      | 0      | 0      | 0      |   |
| K14558 periodic tryptophan protein 2                                                                       | 0      | 0      | 0      | 0      | 0      | 1      | 0      | 0      | 0      | 0      | 0      | 0      |   |
| K14561 U3 small nucleolar ribonucleoprotein protein IMP4                                                   | 0      | 0      | 0      | 0      | 0      | 0      | 0      | 0      | 0      | 4      | 0      | 3      |   |
| K14564 nucleolar protein 56                                                                                | 0      | 5      | 0      | 0      | 0      | 2      | 0      | 2      | 4      | 4      | 0      | 4      |   |
| K14572 midasin                                                                                             | 0      | 0      | 0      | 0      | 0      | 1      | 0      | 0      | 0      | 0      | 0      | 1      |   |
| K14574 ribosome maturation protein SDO1                                                                    | 0      | 0      | 0      | 0      | 0      | 2      | 2      | 2      | 0      | 2      | 5      | 5      |   |
| Folding, sorting and degradation                                                                           | 174908 | 175003 | 177026 | 175944 | 193526 | 195858 | 195289 | 193074 | 181441 | 180503 | 180689 | 179546 |   |
| ko03060 Protein export                                                                                     | 53866  | 54160  | 54942  | 54304  | 61801  | 62256  | 62358  | 61735  | 57576  | 56944  | 56998  | 55828  |   |
| K03070 preprotein translocase subunit SecA [EC:7.4.2.8]                                                    | 10636  | 10483  | 10919  | 10637  | 11748  | 12054  | 12206  | 12189  | 11170  | 11026  | 10733  | 10698  |   |
| K03071 preprotein translocase subunit SecB                                                                 | 1175   | 1157   | 1179   | 1120   | 702    | 770    | 702    | 752    | 698    | 794    | 706    | 760    |   |
| K03072 preprotein translocase subunit SecD                                                                 | 4397   | 4244   | 4335   | 4240   | 2718   | 2657   | 2590   | 2699   | 2659   | 2863   | 2592   | 2701   |   |
| K03073 preprotein translocase subunit SecE                                                                 | 2199   | 1096   | 1075   | 1013   | 1008   | 1037   | 1073   | 929    | 913    | 986    | 980    | 942    |   |
| K03074 preprotein translocase subunit SecF                                                                 | 1010   | 2071   | 2004   | 2046   | 1228   | 1245   | 1263   | 1258   | 1487   | 1553   | 1511   | 1455   |   |
| K03075 preprotein translocase subunit SecG                                                                 | 1123   | 1199   | 1200   | 1236   | 1332   | 1245   | 1054   | 1023   | 1139   | 1098   | 1089   | 1151   |   |
| K03076 preprotein translocase subunit SecY                                                                 | 3699   | 3992   | 4003   | 4120   | 4596   | 4977   | 4909   | 4691   | 4737   | 4851   | 4778   | 4751   |   |
| K03100 signal peptidase I [EC:3.4.21.89]                                                                   | 5225   | 5239   | 5296   | 5203   | 8286   | 8407   | 8553   | 8605   | 7011   | 6772   | 7071   | 6586   |   |
| K03101 signal peptidase II [EC:3.4.23.36]                                                                  | 2010   | 2059   | 2083   | 2088   | 2159   | 2103   | 2138   | 2050   | 1992   | 1913   | 2007   | 1894   |   |
| K03105 signal recognition particle subunit SRP19                                                           | 0      | 0      | 0      | 2      | 2      | 0      | 1      | 0      | 0      | 0      | 0      | 4      |   |
| K03106 signal recognition particle subunit SRP54 [EC:3.6.5.4]                                              | 4524   | 4669   | 4614   | 4627   | 4994   | 4932   | 4883   | 4805   | 4624   | 4591   | 4572   | 4428   |   |
| K03107 signal recognition particle subunit SRP68                                                           | 0      | 0      | 2      | 0      | 0      | 0      | 0      | 0      | 0      | 0      | 0      | 0      |   |
| K03110 fused signal recognition particle receptor                                                          | 3300   | 3317   | 3191   | 3120   | 3400   | 3219   | 3550   | 3550   | 3295   | 3072   | 3238   | 3093   |   |
| K03116 sec-independent protein translocase protein TatA                                                    | 693    | 696    | 691    | 670    | 638    | 648    | 615    | 694    | 604    | 582    | 595    | 563    |   |
| K03117 sec-independent protein translocase protein TatB                                                    | 764    | 676    | 724    | 677    | 504    | 557    | 489    | 572    | 548    | 474    | 499    | 490    |   |
| K03118 sec-independent protein translocase protein TatC                                                    | 2545   | 2535   | 2586   | 2472   | 3282   | 3200   | 3104   | 3217   | 2643   | 2539   | 2543   | 2516   |   |
| K03210 preprotein translocase subunit YajC                                                                 | 1080   | 1137   | 1098   | 1124   | 1096   | 1105   | 994    | 1023   | 1057   | 1035   | 1019   | 1118   |   |
| K03217 YidC/Oxa1 family membrane protein insertase                                                         | 5842   | 5725   | 5902   | 6007   | 6328   | 6366   | 6404   | 6031   | 5969   | 5965   | 5895   | 5903   |   |
| K03425 sec-independent protein translocase protein TatE                                                    | 81     | 104    | 97     | 102    | 80     | 81     | 66     | 60     | 131    | 125    | 121    | 141    |   |
| K09490 heat shock 70kDa protein 5                                                                          | 0      | 1      | 0      | 0      | 0      | 0      | 0      | 0      | 0      | 1      | 0      | 0      |   |
| K12257 SecD/SecE fusion protein                                                                            | 3134   | 3331   | 3515   | 3330   | 7399   | 7358   | 7463   | 7290   | 6275   | 5974   | 6345   | 5940   |   |
| K13280 signal peptidase I [EC:3.4.21.89]                                                                   | 95     | 107    | 127    | 100    | 72     | 60     | 60     | 76     | 163    | 172    | 215    | 196    |   |
| K13301 secretion monitor                                                                                   | 334    | 322    | 301    | 370    | 229    | 235    | 241    | 221    | 459    | 528    | 479    | 498    |   |
| K13431 signal recognition particle receptor subunit alpha                                                  | 0      | 0      | 0      | 0      | 0      | 0      | 0      | 0      | 2      | 0      | 0      | 0      |   |
| ko04141 Protein processing in endoplasmic reticulum                                                        | 8412   | 8499   | 8701   | 8658   | 12448  | 12451  | 12587  | 12521  | 10096  | 10188  | 10311  | 10445  |   |
| K04079 molecular chaperone HtpG                                                                            | 8026   | 8029   | 8183   | 8223   | 11366  | 11368  | 11453  | 11419  | 9422   | 9406   | 9524   | 9661   |   |
| K08852 serine/threonine-protein kinase/endoribonuclease IRE1 [EC:2.7.11.1 3.1.26.-]                        | 0      | 0      | 0      | 0      | 0      | 0      | 0      | 0      | 0      | 0      | 1      | 0      |   |
| K09487 heat shock protein 90kDa beta                                                                       | 1      | 0      | 0      | 0      | 0      | 0      | 0      | 0      | 0      | 0      | 0      | 0      |   |
| K09523 DnaI homolog subfamily C member 3                                                                   | 21     | 18     | 12     | 25     | 61     | 50     | 56     | 49     | 42     | 49     | 37     | 36     |   |
| K13525 transitional endoplasmic reticulum ATPase                                                           | 3      | 2      | 1      | 1      | 1      | 5      | 4      | 0      | 4      | 16     | 19     | 27     |   |
| K13993 HSP20 family protein                                                                                | 341    | 426    | 477    | 387    | 1017   | 1023   | 1068   | 1052   | 603    | 665    | 686    | 678    |   |
| K13996 protein disulfide-isomerase [EC:5.3.4.1]                                                            | 0      | 0      | 0      | 0      | 0      | 0      | 0      | 0      | 0      | 0      | 0      | 1      |   |
| K14002 DnaI-related protein SC11                                                                           | 0      | 0      | 0      | 0      | 0      | 0      | 0      | 0      | 0      | 0      | 1      | 0      |   |
| K14005 protein transport protein SEC31                                                                     | 0      | 0      | 0      | 0      | 0      | 0      | 0      | 0      | 2      | 0      | 0      | 0      |   |
| K14006 protein transport protein SEC23                                                                     | 0      | 0      | 0      | 0      | 0      | 0      | 0      | 0      | 0      | 0      | 3      | 0      |   |
| K14007 protein transport protein SEC24                                                                     | 0      | 2      | 0      | 0      | 0      | 0      | 0      | 0      | 0      | 0      | 0      | 0      |   |
| K14026 SEL1 protein                                                                                        | 0      | 0      | 0      | 0      | 0      | 0      | 0      | 0      | 0      | 1      | 0      | 0      |   |
| K16196 eukaryotic translation initiation factor 2-alpha kinase 4 [EC:2.7.11.1]                             | 0      | 0      | 0      | 0      | 0      | 0      | 0      | 0      | 0      | 1      | 0      | 0      |   |
| ko04130 SNARE interactions in vesicular transport                                                          | 0      | 0      | 0      | 0      | 0      | 0      | 0      | 0      | 0      | 0      | 0      | 1      |   |
| K08517 vesicle transport protein SEC22                                                                     | 0      | 0      | 0      | 0      | 0      | 0      | 0      | 0      | 0      | 0      | 0      | 1      |   |
| ko04120 Ubiquitin mediated proteolysis                                                                     | 4      | 4      | 6      | 2      | 0      | 0      | 0      | 0      | 0      | 0      | 0      | 1      |   |
| K03178 ubiquitin-activating enzyme E1 [EC:6.2.1.45]                                                        | 0      | 0      | 0      | 0      | 0      | 0      | 0      | 0      | 0      | 0      | 0      | 1      |   |
| K03349 anaphase-promoting complex subunit 2                                                                | 0      | 1      | 0      | 0      | 0      | 0      | 0      | 0      | 0      | 0      | 0      | 0      |   |
| K03355 anaphase-promoting complex subunit 8                                                                | 0      | 0      | 1      | 0      | 0      | 0      | 0      | 0      | 0      | 0      | 0      | 0      |   |
| K03364 cell division cycle 20-like protein 1, cofactor of APC complex                                      | 0      | 0      | 0      | 0      | 0      | 0      | 0      | 0      | 0      | 2      | 0      | 0      |   |
| K05633 NEDD4-like E3 ubiquitin-protein ligase WWP1 [EC:2.3.2.26]                                           | 0      | 0      | 2      | 0      | 0      | 0      | 0      | 0      | 0      | 0      | 0      | 0      |   |
| K10595 E3 ubiquitin-protein ligase HERC2 [EC:2.3.2.26]                                                     | 1      | 0      | 2      | 0      | 0      | 0      | 0      | 0      | 0      | 0      | 3      | 0      |   |
| K10614 E3 ubiquitin-protein ligase HERC3 [EC:2.3.2.26]                                                     | 0      | 1      | 1      | 1      | 0      | 0      | 0      | 0      | 0      | 1      | 0      | 1      |   |
| K10615 E3 ubiquitin-protein ligase HERC4 [EC:2.3.2.26]                                                     | 1      | 2      | 0      | 1      | 0      | 0      | 0      | 0      | 0      | 0      | 0      | 0      |   |
| K10685 ubiquitin-like 1-activating enzyme E1 B [EC:6.2.1.45]                                               | 0      | 0      | 0      | 0      | 0      | 0      | 0      | 0      | 0      | 0      | 1      | 0      |   |
| ko04122 Sulfur relay system                                                                                | 30434  | 29942  | 29174  | 29910  | 24195  | 24700  | 24441  | 24495  | 25246  | 24898  | 24555  | 25199  |   |
| K00566 tRNA-uridine 2-sulfurtransferase [EC:2.8.1.13]                                                      | 4897   | 5091   | 5183   | 5058   | 8673   | 8651   | 8798   | 8422   | 7448   | 7019   | 7170   | 7094   |   |
| K03154 sulfur carrier protein                                                                              | 598    | 599    | 514    | 556    | 586    | 613    | 750    | 622    | 512    | 505    | 540    | 528    |   |
| K03636 sulfur-carrier protein                                                                              | 598    | 593    | 581    | 606    | 322    | 319    | 345    | 372    | 380    | 412    | 370    | 387    |   |
| K04085 tRNA 2-thiouridine synthesizing protein A [EC:2.8.1.-]                                              | 569    | 582    | 607    | 550    | 336    | 308    | 308    | 339    | 388    | 398    | 378    | 385    |   |
| K07235 tRNA 2-thiouridine synthesizing protein D [EC:2.8.1.-]                                              | 350    | 364    | 353    | 346    | 197    | 230    | 235    | 182    | 399    | 384    | 411    | 415    |   |
| K07236 tRNA 2-thiouridine synthesizing protein C                                                           | 763    | 722    | 685    | 705    | 424    | 432    | 431    | 435    | 432    | 434    | 411    | 531    |   |
| K07237 tRNA 2-thiouridine synthesizing protein B                                                           | 615    | 633    | 577    | 560    | 361    | 403    | 351    | 374    | 381    | 352    | 344    | 356    |   |
| K11179 tRNA 2-thiouridine synthesizing protein E [EC:2.8.1.-]                                              | 645    | 631    | 565    | 639    | 401    | 372    | 399    | 439    | 356    | 314    | 347    | 383    |   |
| K11996 adenylyltransferase and sulfurtransferase [EC:2.7.7.80 2.8.1.11]                                    | 3      | 9      | 5      | 7      | 1      | 1      | 0      | 0      | 7      | 1      | 4      | 1      |   |
| K21028 molybdopterine synthase sulfurtransferase [EC:2.8.1.11]                                             | 795    | 811    | 622    | 671    | 418    | 490    | 439    | 381    | 1082   | 1073   | 934    | 1009   |   |
| K21029 molybdopterine synthase adenylyltransferase [EC:2.7.7.80]                                           | 1608   | 1680   | 1595   | 1721   | 1939   | 2114   | 2095   | 2081   | 1714   | 1598   | 1764   | 1618   |   |
| K21140 [CysO sulfur-carrier protein]-S-L-cysteine hydrolase [EC:3.13.1.6]                                  | 5      | 12     | 22     | 1      | 11     | 0      | 0      | 0      | 0      | 0      | 10     | 0      |   |
| K21147 sulfur-carrier protein adenylyltransferase/sulfurtransferase [EC:2.7.7.80 2.7.7.- 2.8.1.11 2.8.1.-] | 5      | 9      | 5      | 7      | 8      | 11     | 4      | 11     | 9      | 10     | 5      | 14     |   |
| ko03050 Proteasome                                                                                         | 4      | 7      | 4      | 5      | 4      | 5      | 0      | 7      | 22     | 23     | 23     | 31     |   |
| K03039 26S proteasome regulatory subunit N9                                                                | 0      | 1      | 0      | 0      | 0      | 0      | 0      | 0      | 0      | 0      | 0      | 0      |   |
| K03063 26S proteasome regulatory subunit T3                                                                | 0      | 0      | 0      | 0      | 0      | 0      | 0      | 0      | 1      | 0      | 1      | 0      |   |
| K03420 proteasome regulatory subunit                                                                       | 0      | 2      | 2      | 0      | 0      | 0      | 0      | 0      | 2      | 3      | 8      | 2      |   |
| K03432 proteasome alpha subunit [EC:3.4.25.1]                                                              | 0      | 0      | 0      | 1      | 2      | 1      | 0      | 0      | 6      | 9      | 1      | 6      |   |
| K03433 proteasome beta subunit [EC:3.4.25.1]                                                               | 1      | 0      | 0      | 0      | 0      | 0      | 0      | 0      | 6      | 1      | 7      | 3      |   |
| K13527 proteasome-associated ATPase                                                                        | 3      | 4      | 2      | 4      | 2      | 4      | 0      | 7      | 7      | 10     | 6      | 20     |   |
| ko03018 RNA degradation                                                                                    | 82190  | 82392  | 84199  | 83065  | 95078  | 96446  | 95903  | 94316  | 88501  | 88448  | 88797  | 88041  |   |
| K00962 polynucleotide nucleotidyltransferase [EC:2.7.7.8]                                                  | 7679   | 7904   | 8044   | 8058   | 8614   | 8710   | 8825   | 8374   | 8209   | 8316   | 7988   | 8093   |   |
| K00970 poly(A) polymerase [EC:2.7.7.19]                                                                    | 3405   | 3310   | 3282   | 3277   | 2105   | 2040   | 2088   | 2169   | 2083   | 2185   | 1965   | 2123   |   |
| K03628 transcription termination factor Rho                                                                | 3808   | 3769   | 4105   | 4006   | 4689   | 4575   | 5157   | 5110   | 4393   | 4267   | 4525   | 4306   |   |
| K03654 ATP-dependent DNA helicase RecQ [EC:3.6.4.12]                                                       | 9850   | 9595   | 10348  | 9987   | 18898  | 18974  | 19017  | 18434  | 15542  | 14692  | 15454  | 14979  |   |
| K03666 host factor-I protein                                                                               | 541    | 586    | 606    | 538    | 415    | 376    | 374    | 360    | 325    | 429    | 373    | 382    |   |
| K03679 exosome complex component RRP4                                                                      | 0      | 2      | 0      | 0      | 0      | 0      | 0      | 0      | 2      | 2      | 3      | 11     |   |
| K03732 ATP-dependent RNA helicase RhlB [EC:3.6.4.13]                                                       | 3058   | 2982   | 2950   | 2932   | 1795   | 1837   | 1830   | 1735   | 1790   | 1813   | 1701   | 1762   |   |
| K04043 molecular chaperone DnaK                                                                            | 6782   | 6847   | 7192   | 6984   | 7162   | 7302   | 7013   | 6897   | 6986   | 7299   | 7201   | 6902   |   |
| K04077 chaperonin GroEL                                                                                    | 4258   | 4169   | 4478   | 4105   | 5113   | 5245   | 4692   | 4639   | 5013   | 5069   | 5107   | 4892   |   |
| K05592 ATP-dependent RNA helicase DeaD [EC:3.6.4.13]                                                       | 6496   | 6599   | 6481   | 6510   | 6860   | 7077   | 7188   | 7071   | 7441   | 7488   | 7184   | 7423   |   |
| K07573 exosome complex component CSL4                                                                      | 0      | 0      | 0      | 1      | 0      | 0      | 0      | 0      | 5      | 8      | 9      | 3      |   |
| K08300 ribonuclease E [EC:3.1.26.12]                                                                       | 2774   | 2841   | 2769   | 2880   | 1795   | 18     |        |        |        |        |        |        |   |

|                                                                                                                                            |         |         |         |         |        |        |        |        |         |         |         |         |
|--------------------------------------------------------------------------------------------------------------------------------------------|---------|---------|---------|---------|--------|--------|--------|--------|---------|---------|---------|---------|
| K02337 DNA polymerase III subunit alpha [EC:2.7.7.7]                                                                                       | 12304   | 12500   | 12857   | 12459   | 14834  | 14955  | 14807  | 14744  | 13683   | 13284   | 13590   | 13450   |
| K02338 DNA polymerase III subunit beta [EC:2.7.7.7]                                                                                        | 3544    | 3711    | 3902    | 3862    | 3852   | 3894   | 3772   | 3616   | 4045    | 4105    | 4010    | 4060    |
| K02339 DNA polymerase III subunit chi [EC:2.7.7.7]                                                                                         | 1024    | 964     | 913     | 1029    | 606    | 630    | 545    | 670    | 717     | 679     | 574     | 583     |
| K02340 DNA polymerase III subunit delta [EC:2.7.7.7]                                                                                       | 3246    | 3131    | 3203    | 3116    | 3335   | 3431   | 3507   | 3327   | 3331    | 3048    | 3351    | 3205    |
| K02341 DNA polymerase III subunit delta' [EC:2.7.7.7]                                                                                      | 3618    | 3562    | 3561    | 3527    | 3787   | 3761   | 3873   | 3861   | 3515    | 3566    | 3591    | 3736    |
| K02342 DNA polymerase III subunit epsilon [EC:2.7.7.7]                                                                                     | 3123    | 3318    | 3288    | 3223    | 4529   | 4563   | 4564   | 4333   | 3484    | 3250    | 3467    | 3476    |
| K02343 DNA polymerase III subunit gamma/tau [EC:2.7.7.7]                                                                                   | 5536    | 5208    | 5411    | 5293    | 5960   | 6163   | 5981   | 5726   | 5693    | 5579    | 5643    | 5520    |
| K02344 DNA polymerase III subunit psi [EC:2.7.7.7]                                                                                         | 289     | 255     | 234     | 275     | 161    | 226    | 180    | 208    | 297     | 340     | 346     | 374     |
| K02345 DNA polymerase III subunit theta [EC:2.7.7.7]                                                                                       | 121     | 128     | 142     | 134     | 92     | 95     | 84     | 89     | 199     | 195     | 211     | 202     |
| K02683 DNA primase small subunit [EC:2.7.7.102]                                                                                            | 0       | 0       | 0       | 0       | 5      | 0      | 0      | 0      | 0       | 0       | 2       | 4       |
| K03111 single-strand DNA-binding protein                                                                                                   | 2962    | 2949    | 3065    | 3127    | 3031   | 3075   | 3098   | 3041   | 3808    | 3804    | 3864    | 3883    |
| K03469 ribonuclease H [EC:3.1.26.4]                                                                                                        | 1788    | 1825    | 1880    | 1767    | 2550   | 2523   | 2523   | 2689   | 2420    | 2290    | 2234    | 2204    |
| K03470 ribonuclease HII [EC:3.1.26.4]                                                                                                      | 1745    | 1797    | 1871    | 1735    | 2183   | 2349   | 2144   | 2191   | 2205    | 2053    | 2232    | 2062    |
| K03471 ribonuclease HIII [EC:3.1.26.4]                                                                                                     | 75      | 76      | 78      | 74      | 13     | 27     | 19     | 12     | 112     | 105     | 83      | 103     |
| K03763 DNA polymerase III subunit alpha, Gram-positive type [EC:2.7.7.7]                                                                   | 2192    | 2181    | 2196    | 2214    | 635    | 679    | 686    | 610    | 2336    | 2415    | 2351    | 2395    |
| K04799 flap endonuclease-1 [EC:3.-.-.]                                                                                                     | 3       | 5       | 0       | 3       | 0      | 0      | 2      | 0      | 9       | 12      | 0       | 11      |
| K04800 replication factor C large subunit                                                                                                  | 2       | 0       | 2       | 0       | 5      | 5      | 0      | 2      | 9       | 12      | 9       | 11      |
| K04801 replication factor C small subunit                                                                                                  | 3       | 0       | 2       | 1       | 0      | 0      | 0      | 2      | 7       | 9       | 4       | 12      |
| K04802 proliferating cell nuclear antigen                                                                                                  | 1       | 0       | 0       | 1       | 1      | 0      | 0      | 1      | 2       | 4       | 3       | 4       |
| K07466 replication factor A1                                                                                                               | 0       | 2       | 0       | 0       | 2      | 0      | 5      | 0      | 11      | 10      | 8       | 14      |
| K10726 replicative DNA helicase Mcm [EC:3.6.4.-]                                                                                           | 3       | 5       | 2       | 3       | 2      | 5      | 0      | 3      | 5       | 8       | 7       | 11      |
| K10747 DNA ligase 1 [EC:6.5.1.1 6.5.1.6 6.5.1.7]                                                                                           | 2       | 9       | 0       | 3       | 0      | 2      | 2      | 0      | 14      | 16      | 10      | 11      |
| K10755 replication factor C subunit 2/4                                                                                                    | 0       | 0       | 0       | 0       | 0      | 0      | 0      | 0      | 0       | 0       | 2       | 0       |
| K18882 DNA primase large subunit                                                                                                           | 2       | 0       | 2       | 3       | 0      | 0      | 0      | 3      | 4       | 6       | 3       | 12      |
| ko03410 Base excision repair                                                                                                               | 44773   | 44916   | 44980   | 45088   | 43972  | 44468  | 44484  | 43947  | 44065   | 45365   | 45474   | 44824   |
| K01142 exodeoxyribonuclease III [EC:3.1.11.2]                                                                                              | 5333    | 5424    | 5434    | 5293    | 4344   | 4223   | 4228   | 4264   | 3684    | 3715    | 3665    | 3741    |
| K01151 deoxyribonuclease IV [EC:3.1.21.2]                                                                                                  | 1465    | 1420    | 1481    | 1487    | 2137   | 2135   | 2176   | 2067   | 2180    | 2289    | 2399    | 2209    |
| K01246 DNA-3-methyladenine glycosylase I [EC:3.2.2.20]                                                                                     | 1589    | 1646    | 1593    | 1659    | 888    | 984    | 914    | 925    | 1197    | 1280    | 1193    | 1320    |
| K01247 DNA-3-methyladenine glycosylase II [EC:3.2.2.21]                                                                                    | 2246    | 2214    | 2037    | 2143    | 1385   | 1312   | 1266   | 1389   | 1281    | 1157    | 1230    | 1286    |
| K03575 A/G-specific adenine glycosylase [EC:3.2.2.31]                                                                                      | 2237    | 2158    | 2127    | 2192    | 2876   | 2750   | 2886   | 2942   | 2958    | 2982    | 2997    | 2932    |
| K03648 uracil-DNA glycosylase [EC:3.2.2.27]                                                                                                | 1481    | 1589    | 1653    | 1620    | 2033   | 1995   | 2067   | 2011   | 2024    | 2182    | 2269    | 2096    |
| K03649 double-stranded uracil-DNA glycosylase [EC:3.2.2.28]                                                                                | 217     | 194     | 160     | 203     | 69     | 68     | 63     | 56     | 413     | 305     | 380     | 407     |
| K03652 DNA-3-methyladenine glycosylase [EC:3.2.2.21]                                                                                       | 1241    | 1110    | 1012    | 1146    | 624    | 708    | 600    | 628    | 372     | 402     | 381     | 410     |
| K03660 N-glycosylase/DNA lyase [EC:3.2.2.- 4.2.99.18]                                                                                      | 284     | 237     | 283     | 257     | 126    | 114    | 96     | 95     | 298     | 296     | 286     | 291     |
| K05522 endonuclease VIII [EC:3.2.2.- 4.2.99.18]                                                                                            | 439     | 478     | 464     | 488     | 243    | 333    | 289    | 269    | 638     | 669     | 650     | 633     |
| K07462 single-stranded-DNA-specific exonuclease [EC:3.1.-.]                                                                                | 5683    | 5786    | 5842    | 5684    | 6305   | 6696   | 6356   | 6466   | 6125    | 6051    | 6218    | 6025    |
| K10563 formamidopyrimidine-DNA glycosylase [EC:3.2.2.23 4.2.99.18]                                                                         | 2623    | 2534    | 2466    | 2671    | 1660   | 1604   | 1544   | 1577   | 2024    | 2139    | 2013    | 2128    |
| K10771 AP endonuclease 1 [EC:4.2.99.18]                                                                                                    | 0       | 0       | 0       | 0       | 0      | 0      | 0      | 2      | 0       | 0       | 0       | 0       |
| K10773 endonuclease III [EC:4.2.99.18]                                                                                                     | 1858    | 1881    | 1994    | 1913    | 2106   | 2124   | 2200   | 2017   | 2231    | 2375    | 2409    | 2324    |
| K13529 AraC family transcriptional regulator, regulatory protein of adaptative response / DNA-3-methyladenine glycosylase II [EC:3.2.2.21] | 65      | 40      | 62      | 47      | 3      | 1      | 3      | 3      | 71      | 122     | 102     | 101     |
| K021929 uracil-DNA glycosylase [EC:3.2.2.27]                                                                                               | 103     | 103     | 101     | 104     | 91     | 78     | 93     | 78     | 178     | 179     | 198     | 178     |
| ko03420 Nucleotide excision repair                                                                                                         | 68927   | 68654   | 69435   | 69165   | 72260  | 72411  | 73537  | 72615  | 75462   | 78424   | 77456   | 77000   |
| K03657 DNA helicase II / ATP-dependent DNA helicase PcrA [EC:3.6.4.12]                                                                     | 19959   | 13587   | 13845   | 13842   | 12531  | 12388  | 12758  | 12375  | 18755   | 19996   | 19413   | 19434   |
| K03703 excinuclease ABC subunit A                                                                                                          | 12837   | 12866   | 13045   | 12916   | 16770  | 16619  | 16882  | 17180  | 15194   | 15087   | 15327   | 15103   |
| K03702 excinuclease ABC subunit B                                                                                                          | 6889    | 7033    | 6994    | 7125    | 6930   | 6852   | 7055   | 6939   | 6883    | 7136    | 6805    | 6969    |
| K03703 excinuclease ABC subunit C                                                                                                          | 6235    | 6121    | 6226    | 6094    | 6834   | 7122   | 7032   | 6976   | 6308    | 6712    | 6659    | 6527    |
| K03723 transcription-repair coupling factor (superfamily II helicase) [EC:3.6.4.-]                                                         | 11097   | 10946   | 11065   | 10996   | 10106  | 10088  | 9994   | 9974   | 9925    | 10260   | 10148   | 10209   |
| K10841 DNA excision repair protein ERCC-6                                                                                                  | 1       | 2       | 0       | 4       | 3      | 6      | 6      | 10     | 1       | 4       | 7       | 5       |
| ko03430 Mismatch repair                                                                                                                    | 96434   | 95961   | 97299   | 96882   | 100847 | 101951 | 102336 | 100654 | 105670  | 106202  | 106571  | 106294  |
| K01141 exodeoxyribonuclease I [EC:3.1.11.1]                                                                                                | 3094    | 3153    | 3079    | 3148    | 1940   | 1876   | 1907   | 1952   | 2024    | 1959    | 1898    | 1999    |
| K03555 DNA mismatch repair protein MutS                                                                                                    | 8181    | 8083    | 7996    | 8009    | 10025  | 10112  | 10301  | 10184  | 8969    | 8929    | 9114    | 9086    |
| K03572 DNA mismatch repair protein MutL                                                                                                    | 5814    | 5784    | 5754    | 5890    | 6807   | 6647   | 6918   | 6824   | 6349    | 6272    | 6196    | 6187    |
| K03573 DNA mismatch repair protein MutH                                                                                                    | 424     | 459     | 420     | 436     | 266    | 341    | 326    | 331    | 587     | 544     | 492     | 618     |
| K03601 exodeoxyribonuclease VII large subunit [EC:3.1.11.6]                                                                                | 5514    | 5199    | 5382    | 5300    | 4797   | 4911   | 4421   | 4515   | 4545    | 4356    | 4419    | 4458    |
| K03602 exodeoxyribonuclease VII small subunit [EC:3.1.11.6]                                                                                | 975     | 963     | 972     | 928     | 856    | 892    | 852    | 887    | 761     | 789     | 770     | 826     |
| K06223 DNA adenine methylase [EC:2.1.1.72]                                                                                                 | 3937    | 3953    | 4012    | 4001    | 3805   | 3804   | 3802   | 3866   | 3212    | 3265    | 3275    | 3256    |
| K07456 DNA mismatch repair protein MutS2                                                                                                   | 3276    | 3307    | 3504    | 3443    | 4979   | 4958   | 5551   | 5323   | 4987    | 5104    | 5149    | 4925    |
| K07873 DNA mismatch repair protein MSH6                                                                                                    | 0       | 0       | 0       | 0       | 0      | 0      | 0      | 0      | 0       | 1       | 0       | 0       |
| K10857 exodeoxyribonuclease X [EC:3.1.11.-]                                                                                                | 321     | 375     | 329     | 396     | 265    | 263    | 252    | 245    | 523     | 468     | 545     | 521     |
| ko03440 Homologous recombination                                                                                                           | 115605  | 114607  | 114030  | 114803  | 111260 | 113115 | 111375 | 112252 | 112459  | 110741  | 112283  | 111588  |
| K01159 crossover junction endodeoxyribonuclease RuvC [EC:3.1.22.4]                                                                         | 1084    | 1191    | 1093    | 1122    | 1634   | 1607   | 1576   | 1556   | 1468    | 1486    | 1439    | 1568    |
| K02317 DNA replication protein DnaT                                                                                                        | 350     | 344     | 336     | 358     | 201    | 216    | 252    | 217    | 443     | 460     | 455     | 467     |
| K02686 primosomal replication protein N                                                                                                    | 216     | 241     | 200     | 216     | 173    | 162    | 166    | 147    | 347     | 354     | 292     | 341     |
| K03550 holliday junction DNA helicase RuvA [EC:3.6.4.12]                                                                                   | 1507    | 1510    | 1466    | 1461    | 1832   | 1809   | 1759   | 1854   | 1762    | 1757    | 1758    | 1745    |
| K03551 holliday junction DNA helicase RuvB [EC:3.6.4.12]                                                                                   | 2946    | 3039    | 3132    | 3059    | 3829   | 3977   | 3902   | 4018   | 3727    | 3691    | 3896    | 3601    |
| K03553 recombination protein RecA                                                                                                          | 3020    | 2886    | 3154    | 3134    | 3405   | 3368   | 3476   | 3560   | 3545    | 3530    | 3761    | 3492    |
| K03581 exodeoxyribonuclease V alpha subunit [EC:3.1.11.5]                                                                                  | 6270    | 6197    | 5845    | 6211    | 3229   | 3318   | 3096   | 3235   | 4359    | 4356    | 4215    | 4450    |
| K03582 exodeoxyribonuclease V beta subunit [EC:3.1.11.5]                                                                                   | 7894    | 7640    | 7007    | 7779    | 4271   | 4573   | 4291   | 4800   | 4797    | 4655    | 4728    | 4680    |
| K03583 exodeoxyribonuclease V gamma subunit [EC:3.1.11.5]                                                                                  | 7570    | 7308    | 6888    | 6984    | 4327   | 4274   | 4037   | 4392   | 4547    | 4392    | 4452    | 4560    |
| K03584 DNA repair protein RecO (recombination protein O)                                                                                   | 1658    | 1664    | 1793    | 1750    | 2446   | 2467   | 2494   | 2419   | 2361    | 2387    | 2417    | 2328    |
| K03629 DNA replication and repair protein RecF                                                                                             | 3793    | 3791    | 3811    | 3940    | 3981   | 4027   | 4090   | 3937   | 3821    | 3946    | 4000    | 4084    |
| K03655 ATP-dependent DNA helicase RecG [EC:3.6.4.12]                                                                                       | 8326    | 8125    | 8243    | 8217    | 8738   | 8822   | 8758   | 8759   | 9776    | 9910    | 9952    | 10112   |
| K04066 primosomal protein N' (replication factor Y') (superfamily II helicase) [EC:3.6.4.-]                                                | 8251    | 8202    | 8099    | 8320    | 9268   | 9339   | 9160   | 9485   | 8474    | 8238    | 8457    | 8377    |
| K04067 primosomal replication protein N"                                                                                                   | 6143    | 5830    | 5430    | 5469    | 3088   | 3090   | 2817   | 3095   | 2208    | 2030    | 2066    | 2156    |
| K06187 recombination protein RecK                                                                                                          | 2326    | 2250    | 2051    | 2203    | 2072   | 2152   | 2132   | 2276   | 2132    | 2206    | 2161    | 2234    |
| K10866 DNA repair protein RAD50 [EC:3.6.-.]                                                                                                | 0       | 0       | 0       | 0       | 2      | 0      | 0      | 0      | 0       | 0       | 0       | 0       |
| K10877 DNA repair and recombination protein RAD54B [EC:3.6.4.-]                                                                            | 0       | 0       | 0       | 0       | 0      | 0      | 1      | 0      | 0       | 0       | 0       | 0       |
| K10901 bloom syndrome protein [EC:3.6.4.12]                                                                                                | 0       | 0       | 0       | 1       | 0      | 0      | 0      | 0      | 0       | 0       | 0       | 0       |
| ko03450 Non-homologous end-joining                                                                                                         | 5222    | 5037    | 4877    | 4964    | 3160   | 3082   | 3141   | 3237   | 3143    | 3099    | 3084    | 3201    |
| K01971 bifunctional non-homologous end joining protein LigD [EC:6.5.1.1]                                                                   | 3714    | 3624    | 3514    | 3500    | 2674   | 2536   | 2649   | 2671   | 2200    | 2139    | 2135    | 2200    |
| K10979 DNA end-binding protein Ku                                                                                                          | 1505    | 1408    | 1363    | 1461    | 484    | 546    | 490    | 566    | 934     | 948     | 949     | 990     |
| ko03460 Fanconi anemia pathway                                                                                                             | 0       | 4       | 0       | 1       | 5      | 4      | 5      | 0      | 21      | 31      | 18      | 29      |
| K10896 fanconi anemia group M protein                                                                                                      | 0       | 2       | 0       | 0       | 0      | 3      | 4      | 0      | 10      | 21      | 10      | 15      |
| Environmental Information Processing                                                                                                       | 1423762 | 1411500 | 1378838 | 1410317 | 953242 | 962025 | 932646 | 956282 | 1095507 | 1116892 | 1087436 | 1117623 |
| Membrane transport                                                                                                                         | 804952  | 799226  | 778794  | 799027  | 505515 | 511270 | 495820 | 508714 | 653310  | 672004  | 649760  | 670760  |
| ko02010 ABC transporters                                                                                                                   | 547645  | 543469  | 532152  | 545891  | 332376 | 337586 | 327016 | 334562 | 461008  | 476958  | 462089  | 476914  |
| K01995 branched-chain amino acid transport system ATP-binding protein                                                                      | 4231    | 4260    | 4059    | 4370    | 2411   | 2442   | 2382   | 2302   | 3121    | 3284    | 3050    | 3227    |
| K01996 branched-chain amino acid transport system ATP-binding protein                                                                      | 3653    | 3632    | 3751    | 3822    | 2071   | 2168   | 2049   | 2130   | 2987    | 3099    | 2961    | 3022    |
| K01997 branched-chain amino acid transport system permease protein                                                                         | 5127    | 4999    | 5054    | 5121    | 2665   | 2934   | 2760   | 2881   | 3825    | 3988    | 3665    | 3793    |
| K01998 branched-chain amino acid transport system permease protein                                                                         | 8864    | 8720    | 8806    | 8876    | 4940   | 4946   | 4720   | 4962   | 5051    | 5479    | 5384    | 5335    |
| K01999 branched-chain amino acid transport system substrate-binding protein                                                                | 8994    | 9109    | 8708    | 9021    | 5632   | 5660   | 5267   | 5536   | 6171    | 6501    | 6015    | 6441    |
| K02000 glycine betaine/proline transport system ATP-binding protein [EC:7.6.2.9]                                                           | 4639    | 4718    | 4750    | 4722    | 4895   | 4809   | 4933   | 4927   | 3930    | 3915    | 3968    | 3858    |
| K02001 glycine betaine/proline transport system permease protein                                                                           | 4094    | 4130    | 3946    | 4040    | 3765   | 3730   | 3559   | 3709   | 3061    | 3121    | 3061    | 2990    |
| K02002 glycine betaine/proline transport system substrate-binding protein                                                                  | 7561    | 7843    | 7293    | 7444    | 5841   | 5722   | 5405   | 5587   | 4243    | 4281    | 4178    | 4184    |
| K02006 cobalt/nickel transport system ATP-binding protein                                                                                  | 802     | 826     | 815     | 843     | 468    | 444    | 414    | 435    | 1051    | 11      |         |         |

|                                                                                          |      |      |      |      |      |      |      |      |      |      |      |      |
|------------------------------------------------------------------------------------------|------|------|------|------|------|------|------|------|------|------|------|------|
| K02194 heme exporter protein B                                                           | 1200 | 1198 | 1051 | 1109 | 553  | 596  | 612  | 635  | 867  | 826  | 794  | 849  |
| K02195 heme exporter protein C                                                           | 1473 | 1485 | 1375 | 1377 | 725  | 707  | 724  | 749  | 1010 | 978  | 971  | 987  |
| K02196 heme exporter protein D                                                           | 343  | 346  | 287  | 301  | 193  | 177  | 141  | 166  | 268  | 224  | 204  | 289  |
| K02424 L-cystine transport system substrate-binding protein                              | 1933 | 2054 | 1989 | 2026 | 1320 | 1408 | 1394 | 1345 | 1119 | 1020 | 1200 | 1224 |
| K02471 vitamin B12/bleomycin/antimicrobial transport system ATP-binding/permease protein | 154  | 157  | 138  | 157  | 190  | 180  | 208  | 189  | 259  | 282  | 278  | 267  |
| K03523 biotin transport system substrate-specific component                              | 554  | 570  | 487  | 537  | 181  | 213  | 182  | 157  | 412  | 533  | 445  | 498  |
| K05643 ATP-binding cassette, subfamily A (ABC1), member 3                                | 0    | 0    | 1    | 0    | 0    | 0    | 0    | 0    | 1    | 0    | 0    | 1    |
| K05655 ATP-binding cassette, subfamily B (MDR/TAP), member 8                             | 1    | 0    | 0    | 1    | 0    | 0    | 0    | 0    | 0    | 3    | 1    | 0    |
| K05656 ATP-binding cassette, subfamily B (MDR/TAP), member 9                             | 1    | 0    | 0    | 1    | 0    | 1    | 0    | 0    | 0    | 0    | 0    | 1    |
| K05657 ATP-binding cassette, subfamily B (MDR/TAP), member 10                            | 4    | 2    | 3    | 3    | 0    | 1    | 0    | 0    | 2    | 1    | 6    | 5    |
| K05658 ATP-binding cassette, subfamily B (MDR/TAP), member 1 [EC:7.6.2.2]                | 11   | 6    | 5    | 8    | 2    | 3    | 6    | 3    | 16   | 11   | 12   | 12   |
| K05659 ATP-binding cassette, subfamily B (MDR/TAP), member 4 [EC:7.6.2.2]                | 1    | 0    | 1    | 0    | 0    | 0    | 0    | 0    | 2    | 2    | 3    | 3    |
| K05661 ATP-binding cassette, subfamily B (MDR/TAP), member 6                             | 0    | 0    | 0    | 0    | 1    | 0    | 0    | 0    | 0    | 0    | 1    | 0    |
| K05662 ATP-binding cassette, subfamily B (MDR/TAP), member 7                             | 1    | 0    | 0    | 0    | 0    | 0    | 0    | 0    | 0    | 0    | 0    | 0    |
| K05663 ATP-binding cassette, subfamily B, mitochondrial transport system ATM             | 0    | 0    | 0    | 0    | 0    | 1    | 0    | 0    | 0    | 0    | 0    | 0    |
| K05666 ATP-binding cassette, subfamily C (CFTR/MRP), member 2                            | 0    | 0    | 0    | 0    | 0    | 1    | 0    | 0    | 1    | 1    | 0    | 0    |
| K05673 ATP-binding cassette, subfamily C (CFTR/MRP), member 4                            | 0    | 1    | 1    | 1    | 0    | 0    | 0    | 0    | 0    | 1    | 0    | 0    |
| K05685 macrolide transport system ATP-binding/permease protein [EC:3.6.3.-]              | 3942 | 3828 | 3702 | 3735 | 2174 | 2211 | 2058 | 2263 | 2446 | 2393 | 2267 | 2274 |
| K05772 tungstate transport system substrate-binding protein                              | 20   | 19   | 12   | 19   | 17   | 15   | 19   | 16   | 122  | 113  | 93   | 113  |
| K05773 tungstate transport system permease protein                                       | 9    | 12   | 13   | 15   | 8    | 7    | 18   | 19   | 56   | 85   | 78   | 108  |
| K05776 molybdate transport system ATP-binding protein                                    | 1641 | 1674 | 1684 | 1589 | 3015 | 2877 | 3120 | 2958 | 2921 | 2963 | 3065 | 2958 |
| K05813 sn-glycerol 3-phosphate transport system substrate-binding protein                | 1650 | 1637 | 1597 | 1651 | 759  | 856  | 794  | 872  | 2238 | 2249 | 2177 | 2258 |
| K05814 sn-glycerol 3-phosphate transport system permease protein                         | 1486 | 1525 | 1472 | 1455 | 679  | 687  | 686  | 661  | 1939 | 2126 | 1960 | 2094 |
| K05815 sn-glycerol 3-phosphate transport system permease protein                         | 1430 | 1473 | 1454 | 1432 | 564  | 568  | 631  | 616  | 1862 | 2080 | 1934 | 2062 |
| K05816 sn-glycerol 3-phosphate transport system ATP-binding protein [EC:7.6.2.10]        | 1417 | 1455 | 1379 | 1482 | 751  | 813  | 831  | 763  | 1953 | 2111 | 1966 | 2191 |
| K05845 osmoprotectant transport system substrate-binding protein                         | 1846 | 1829 | 1774 | 1827 | 1056 | 1183 | 1054 | 1004 | 1469 | 1618 | 1480 | 1594 |
| K05846 osmoprotectant transport system permease protein                                  | 2582 | 2539 | 2373 | 2460 | 1624 | 1615 | 1612 | 1734 | 2051 | 2084 | 1966 | 2113 |
| K05847 osmoprotectant transport system ATP-binding protein [EC:7.6.2.9]                  | 3223 | 3345 | 3177 | 3330 | 1840 | 1857 | 1767 | 1827 | 1939 | 2129 | 1941 | 1995 |
| K06073 vitamin B12 transport system permease protein                                     | 516  | 507  | 527  | 498  | 385  | 371  | 340  | 310  | 728  | 759  | 711  | 728  |
| K06074 vitamin B12 transport system ATP-binding protein [EC:7.6.2.8]                     | 420  | 399  | 409  | 464  | 312  | 293  | 296  | 260  | 625  | 573  | 558  | 587  |
| K06159 multidrug/microcin transport system ATP-binding/permease protein                  | 940  | 895  | 894  | 944  | 601  | 727  | 627  | 639  | 1228 | 1354 | 1355 | 1229 |
| K06160 putative pyoverdine transport system ATP-binding/permease protein                 | 2    | 2    | 2    | 3    | 1    | 1    | 0    | 1    | 0    | 1    | 1    | 1    |
| K06726 D-ribose pyranase [EC:5.4.99.62]                                                  | 343  | 288  | 336  | 358  | 208  | 202  | 204  | 183  | 448  | 434  | 452  | 407  |
| K06857 tungstate transport system ATP-binding protein [EC:7.3.2.6]                       | 8    | 22   | 19   | 25   | 7    | 19   | 23   | 12   | 80   | 63   | 88   | 77   |
| K06858 vitamin B12 transport system substrate-binding protein                            | 1776 | 1675 | 1598 | 1714 | 942  | 1006 | 967  | 1012 | 983  | 1113 | 981  | 1106 |
| K06861 lipopolysaccharide export system ATP-binding protein [EC:3.6.3.-]                 | 1919 | 2093 | 1960 | 1967 | 2553 | 2694 | 2615 | 2526 | 2186 | 2174 | 2200 | 2212 |
| K07091 lipopolysaccharide export system permease protein                                 | 3525 | 3823 | 3800 | 3887 | 5367 | 5518 | 5515 | 5296 | 4388 | 4170 | 4460 | 4250 |
| K07122 phospholipid transport system transporter-binding protein                         | 651  | 716  | 699  | 742  | 448  | 478  | 415  | 376  | 432  | 400  | 449  | 453  |
| K07323 phospholipid transport system substrate-binding protein                           | 1092 | 1033 | 1004 | 1109 | 739  | 737  | 660  | 691  | 616  | 777  | 672  | 726  |
| K08712 ATP-binding cassette, subfamily G (WHITE), member 2, SNQ2                         | 0    | 0    | 0    | 0    | 0    | 2    | 0    | 0    | 0    | 0    | 0    | 0    |
| K09688 capsular polysaccharide transport system permease protein                         | 162  | 171  | 164  | 187  | 267  | 282  | 247  | 251  | 45   | 50   | 44   | 34   |
| K09689 capsular polysaccharide transport system ATP-binding protein [EC:7.6.2.12]        | 163  | 148  | 132  | 112  | 199  | 233  | 203  | 174  | 14   | 9    | 7    | 20   |
| K09690 lipopolysaccharide transport system permease protein                              | 3240 | 3339 | 3241 | 3082 | 1923 | 1867 | 1836 | 2024 | 1569 | 1523 | 1497 | 1495 |
| K09691 lipopolysaccharide transport system ATP-binding protein                           | 3037 | 2905 | 2996 | 3065 | 2109 | 2092 | 1949 | 2071 | 1287 | 1291 | 1352 | 1422 |
| K09692 teichoic acid transport system permease protein                                   | 442  | 426  | 451  | 451  | 105  | 125  | 113  | 101  | 313  | 385  | 324  | 385  |
| K09693 teichoic acid transport system ATP-binding protein [EC:7.5.2.4]                   | 706  | 689  | 668  | 748  | 127  | 150  | 143  | 103  | 546  | 635  | 681  | 740  |
| K09694 lipopoligosaccharide transport system permease protein                            | 0    | 2    | 2    | 0    | 0    | 0    | 0    | 0    | 0    | 0    | 3    | 0    |
| K09695 lipooligosaccharide transport system ATP-binding protein                          | 3    | 2    | 6    | 3    | 2    | 0    | 0    | 1    | 4    | 7    | 4    | 4    |
| K09696 sodium transport system permease protein                                          | 3    | 12   | 10   | 4    | 7    | 7    | 3    | 4    | 34   | 24   | 21   | 21   |
| K09697 sodium transport system ATP-binding protein [EC:7.2.2.4]                          | 4    | 10   | 6    | 7    | 2    | 2    | 0    | 4    | 9    | 3    | 24   | 19   |
| K09808 lipoprotein-releasing system permease protein                                     | 4499 | 4629 | 4754 | 4653 | 7028 | 6978 | 7290 | 7387 | 6099 | 6030 | 6108 | 6050 |
| K09810 lipoprotein-releasing system ATP-binding protein [EC:3.6.3.-]                     | 788  | 877  | 887  | 875  | 1824 | 1829 | 1885 | 1898 | 1662 | 1537 | 1590 | 1589 |
| K09811 cell division transport system permease protein                                   | 3783 | 3733 | 3688 | 3814 | 3684 | 3912 | 3776 | 3795 | 3557 | 3810 | 3908 | 3809 |
| K09812 cell division transport system ATP-binding protein                                | 2764 | 2846 | 2992 | 2918 | 2654 | 2587 | 2731 | 2653 | 2805 | 2827 | 2885 | 2874 |
| K09815 zinc transport system substrate-binding protein                                   | 4900 | 4844 | 4722 | 4900 | 4342 | 4503 | 4293 | 4560 | 4145 | 3968 | 3963 | 4032 |
| K09816 zinc transport system permease protein                                            | 3819 | 3711 | 3730 | 3775 | 3561 | 3486 | 3358 | 3363 | 3193 | 3144 | 3284 | 3131 |
| K09817 zinc transport system ATP-binding protein [EC:7.2.2.-]                            | 3825 | 3835 | 3776 | 3825 | 3777 | 3667 | 3650 | 3735 | 3444 | 3195 | 3346 | 3425 |
| K09969 general L-amino acid transport system substrate-binding protein                   | 1983 | 2075 | 1854 | 1891 | 1450 | 1430 | 1335 | 1372 | 717  | 745  | 696  | 627  |
| K09970 general L-amino acid transport system permease protein                            | 317  | 288  | 301  | 342  | 445  | 468  | 436  | 439  | 157  | 155  | 170  | 160  |
| K09971 general L-amino acid transport system permease protein                            | 267  | 273  | 310  | 296  | 456  | 501  | 477  | 442  | 156  | 132  | 138  | 138  |
| K09972 general L-amino acid transport system ATP-binding protein [EC:7.4.2.1]            | 173  | 136  | 131  | 150  | 234  | 279  | 202  | 261  | 74   | 52   | 43   | 65   |
| K09996 arginine transport system substrate-binding protein                               | 702  | 688  | 645  | 707  | 385  | 375  | 413  | 348  | 1173 | 1238 | 1108 | 1197 |
| K09997 arginine transport system substrate-binding protein                               | 269  | 250  | 275  | 262  | 215  | 276  | 264  | 237  | 268  | 287  | 277  | 235  |
| K09998 arginine transport system permease protein                                        | 393  | 357  | 376  | 334  | 238  | 238  | 213  | 233  | 483  | 569  | 452  | 463  |
| K09999 arginine transport system permease protein                                        | 399  | 389  | 375  | 416  | 281  | 332  | 272  | 294  | 572  | 633  | 586  | 652  |
| K10000 arginine transport system ATP-binding protein [EC:7.4.2.1]                        | 476  | 418  | 422  | 525  | 276  | 340  | 330  | 341  | 655  | 674  | 638  | 648  |
| K10001 glutamate/aspartate transport system substrate-binding protein                    | 2101 | 2176 | 2111 | 2150 | 1252 | 1249 | 1245 | 1282 | 1412 | 1395 | 1385 | 1390 |
| K10002 glutamate/aspartate transport system permease protein                             | 1423 | 1356 | 1303 | 1195 | 818  | 910  | 810  | 814  | 855  | 809  | 813  | 904  |
| K10003 glutamate/aspartate transport system permease protein                             | 1278 | 1269 | 1297 | 1284 | 811  | 909  | 806  | 821  | 927  | 915  | 888  | 950  |
| K10004 glutamate/aspartate transport system ATP-binding protein [EC:7.4.2.1]             | 1324 | 1218 | 1269 | 1350 | 833  | 853  | 809  | 832  | 889  | 945  | 854  | 901  |
| K10005 glutamate transport system substrate-binding protein                              | 2    | 2    | 5    | 2    | 0    | 2    | 0    | 3    | 4    | 5    | 2    | 11   |
| K10006 glutamate transport system permease protein                                       | 0    | 0    | 2    | 5    | 2    | 3    | 1    | 2    | 4    | 1    | 0    | 4    |
| K10007 glutamate transport system permease protein                                       | 2    | 5    | 9    | 1    | 4    | 6    | 3    | 3    | 7    | 13   | 4    | 20   |
| K10008 glutamate transport system ATP-binding protein [EC:7.4.2.1]                       | 19   | 20   | 21   | 27   | 5    | 5    | 3    | 7    | 21   | 17   | 13   | 15   |
| K10009 L-cystine transport system permease protein                                       | 1688 | 1671 | 1593 | 1615 | 1186 | 1186 | 1045 | 1154 | 860  | 824  | 796  | 907  |
| K10010 L-cystine transport system ATP-binding protein [EC:7.4.2.1]                       | 532  | 544  | 523  | 584  | 573  | 605  | 518  | 555  | 570  | 549  | 510  | 533  |
| K10013 lysine/arginine/ornithine transport system substrate-binding protein              | 805  | 722  | 734  | 769  | 525  | 644  | 566  | 569  | 978  | 968  | 1002 | 983  |
| K10014 histidine transport system substrate-binding protein                              | 1528 | 1520 | 1557 | 1549 | 846  | 978  | 899  | 1025 | 1002 | 995  | 941  | 1021 |
| K10015 histidine transport system permease protein                                       | 1239 | 1275 | 1132 | 1183 | 727  | 679  | 665  | 661  | 692  | 822  | 763  | 767  |
| K10016 histidine transport system permease protein                                       | 982  | 1051 | 961  | 1068 | 597  | 616  | 573  | 607  | 767  | 731  | 728  | 843  |
| K10017 histidine transport system ATP-binding protein [EC:7.4.2.1]                       | 1450 | 1443 | 1320 | 1375 | 900  | 794  | 761  | 842  | 856  | 878  | 856  | 864  |
| K10018 octopine/nopaline transport system substrate-binding protein                      | 5    | 1    | 4    | 0    | 0    | 0    | 5    | 2    | 6    | 3    | 3    | 9    |
| K10019 octopine/nopaline transport system permease protein                               | 1    | 0    | 0    | 0    | 0    | 1    | 1    | 0    | 4    | 0    | 5    | 1    |
| K10020 octopine/nopaline transport system permease protein                               | 2    | 1    | 0    | 0    | 1    | 5    | 2    | 0    | 3    | 1    | 3    | 3    |
| K10021 octopine/nopaline transport system ATP-binding protein [EC:7.4.2.1]               | 4    | 4    | 4    | 1    | 0    | 5    | 0    | 1    | 3    | 3    | 1    | 5    |
| K10022 arginine/ornithine transport system substrate-binding protein                     | 1984 | 1818 | 1846 | 1841 | 994  | 985  | 1047 | 990  | 646  | 586  | 574  | 575  |
| K10023 arginine/ornithine transport system permease protein                              | 1067 | 1011 | 974  | 1049 | 581  | 598  | 526  | 543  | 322  | 300  | 349  | 280  |
| K10024 arginine/ornithine transport system permease protein                              | 1109 | 1133 | 1058 | 1018 | 531  | 622  | 577  | 613  | 416  | 393  | 345  | 297  |
| K10025 arginine/ornithine transport system ATP-binding protein [EC:7.4.2.1]              | 1030 | 967  | 1065 | 965  | 601  | 562  | 522  | 586  | 330  | 288  | 319  | 320  |
| K10036 glutamine transport system substrate-binding protein                              | 662  | 663  | 592  | 619  | 548  | 550  | 497  | 488  | 848  | 918  | 855  | 920  |
| K10037 glutamine transport system permease protein                                       | 610  | 637  | 606  | 581  | 440  | 474  | 426  | 407  | 795  | 893  | 811  | 862  |
| K10038 glutamine transport system ATP-binding protein [EC:7.4.2.1]                       | 527  | 470  | 495  | 473  | 343  | 343  | 293  | 339  | 762  | 687  | 750  | 714  |
| K10039 aspartate/glutamate/glutamine transport system substrate-binding protein          | 56   | 65   | 75   | 68   | 19   | 23   | 22   | 39   | 54   | 79   | 60   | 68   |
| K10040 aspartate/glutamate/glutamine transport system permease protein                   | 109  | 116  | 102  | 108  | 40   | 42   | 40   | 33   | 97   | 116  | 95   | 106  |
| K10041 aspartate/glutamate/glutamine transport system ATP-binding protein [EC:7.4.2.1]   | 59   | 73   | 94   | 91   | 14   | 42   | 26   | 33   | 73   | 78   | 66   | 93   |
| K10107 capsular polysaccharide transport system permease protein                         | 245  | 262  | 263  | 253  | 429  | 421  | 419  | 365  | 93   | 98   | 70   | 77   |
| K10108 maltose/maltodextrin transport system substrate-binding protein                   | 740  | 770  | 737  | 767  | 558  | 590  | 553  | 576  | 1047 | 1143 | 1009 | 1084 |
| K10109 maltose/maltodextrin transport system permease protein                            | 942  | 1024 | 994  | 967  | 708  | 750  | 691  | 694  | 1383 | 1417 | 1357 | 1361 |
| K10110 maltose/maltodextrin transport system permease protein                            | 575  | 591  | 583  | 579  | 388  | 422  | 401  | 420  | 717  | 861  | 848  | 846  |
| K10111 multiple sugar transport system ATP-binding protein [EC:3.6.3.-]                  | 2239 | 2152 | 2095 | 2158 | 1339 | 1412 | 1414 | 1350 | 2162 | 2200 | 2009 | 2254 |
| K10112 multiple sugar transport system ATP-binding protein                               | 3863 | 3896 | 3839 | 3936 | 2048 | 2019 | 2003 | 2103 | 2025 | 2306 | 2122 | 2109 |
| K10117 raffinose/stachyose/melibiose transport system substrate-binding protein          | 8532 | 8247 | 8648 | 8405 | 1482 | 1482 | 1500 | 1408 | 8794 | 9580 | 9305 | 9575 |
| K10118 raffinose/stachyose/melibiose transport system permease protein                   |      |      |      |      |      |      |      |      |      |      |      |      |

|                                                                                    |      |      |      |      |      |      |      |      |      |      |      |      |
|------------------------------------------------------------------------------------|------|------|------|------|------|------|------|------|------|------|------|------|
| K10235 alpha-glucoside transport system ATP-binding protein                        | 0    | 1    | 0    | 2    | 1    | 1    | 0    | 0    | 7    | 5    | 3    | 7    |
| K10236 trehalose/maltose transport system substrate-binding protein                | 4    | 4    | 2    | 1    | 2    | 0    | 0    | 3    | 4    | 6    | 4    |      |
| K10237 trehalose/maltose transport system permease protein                         | 59   | 61   | 70   | 55   | 11   | 18   | 17   | 7    | 59   | 56   | 53   | 55   |
| K10238 trehalose/maltose transport system permease protein                         | 7    | 7    | 10   | 9    | 0    | 0    | 0    | 11   | 2    | 8    | 10   |      |
| K10240 cellobiose transport system substrate-binding protein                       | 3    | 5    | 2    | 1    | 0    | 1    | 1    | 0    | 4    | 3    | 8    | 3    |
| K10241 cellobiose transport system permease protein                                | 464  | 424  | 432  | 450  | 160  | 211  | 191  | 178  | 537  | 592  | 470  | 567  |
| K10242 cellobiose transport system permease protein                                | 182  | 174  | 199  | 208  | 69   | 66   | 69   | 61   | 239  | 259  | 257  | 283  |
| K10439 ribose transport system substrate-binding protein                           | 4577 | 4555 | 4434 | 4547 | 2595 | 2701 | 2612 | 2625 | 4447 | 4753 | 4538 | 4753 |
| K10440 ribose transport system permease protein                                    | 4661 | 4416 | 4450 | 4525 | 2291 | 2528 | 2277 | 2299 | 4390 | 4478 | 4297 | 4530 |
| K10441 ribose transport system ATP-binding protein [EC:7.5.2.7]                    | 6976 | 6946 | 6751 | 6969 | 3754 | 3967 | 3804 | 3849 | 5483 | 5969 | 5577 | 5740 |
| K10537 L-arabinose transport system substrate-binding protein                      | 600  | 558  | 572  | 596  | 306  | 413  | 403  | 449  | 830  | 898  | 775  | 866  |
| K10538 L-arabinose transport system permease protein                               | 447  | 460  | 471  | 488  | 299  | 363  | 359  | 372  | 689  | 748  | 727  | 759  |
| K10539 L-arabinose transport system ATP-binding protein [EC:7.5.2.12]              | 854  | 843  | 867  | 891  | 551  | 589  | 602  | 622  | 1226 | 1171 | 1274 | 1245 |
| K10540 methyl-galactoside transport system substrate-binding protein               | 1930 | 1915 | 1939 | 1943 | 735  | 831  | 683  | 737  | 2077 | 2340 | 2113 | 2231 |
| K10541 methyl-galactoside transport system permease protein                        | 1704 | 1646 | 1822 | 1711 | 656  | 746  | 727  | 673  | 1809 | 1999 | 1943 | 1987 |
| K10542 methyl-galactoside transport system ATP-binding protein [EC:7.5.2.11]       | 2100 | 2132 | 2028 | 2140 | 929  | 1011 | 931  | 938  | 2422 | 2479 | 2372 | 2455 |
| K10543 D-xylose transport system substrate-binding protein                         | 884  | 844  | 806  | 845  | 467  | 511  | 520  | 482  | 1041 | 1102 | 1021 | 1007 |
| K10544 D-xylose transport system permease protein                                  | 673  | 719  | 699  | 637  | 493  | 464  | 524  | 560  | 643  | 703  | 640  | 672  |
| K10545 D-xylose transport system ATP-binding protein [EC:7.5.2.10]                 | 1106 | 1188 | 1121 | 1163 | 689  | 759  | 751  | 800  | 1365 | 1528 | 1350 | 1372 |
| K10546 putative multiple sugar transport system substrate-binding protein          | 58   | 52   | 62   | 68   | 107  | 77   | 73   | 96   | 81   | 90   | 70   | 80   |
| K10547 putative multiple sugar transport system permease protein                   | 62   | 50   | 52   | 57   | 65   | 63   | 65   | 87   | 61   | 100  | 104  | 87   |
| K10548 putative multiple sugar transport system ATP-binding protein [EC:7.5.2.-]   | 149  | 120  | 113  | 144  | 90   | 110  | 81   | 95   | 117  | 149  | 146  | 148  |
| K10549 D-allose transport system substrate-binding protein                         | 5    | 7    | 13   | 6    | 3    | 5    | 8    | 6    | 61   | 72   | 83   | 66   |
| K10550 D-allose transport system permease protein                                  | 11   | 7    | 11   | 10   | 6    | 3    | 2    | 7    | 85   | 91   | 79   | 60   |
| K10551 D-allose transport system ATP-binding protein [EC:7.5.2.8]                  | 29   | 26   | 34   | 23   | 4    | 6    | 16   | 10   | 109  | 99   | 116  | 122  |
| K10552 Fructose transport system substrate-binding protein                         | 0    | 2    | 0    | 0    | 0    | 4    | 0    | 0    | 6    | 2    | 1    |      |
| K10553 fructose transport system permease protein                                  | 0    | 0    | 0    | 0    | 3    | 0    | 2    | 0    | 1    | 1    | 0    | 4    |
| K10554 fructose transport system ATP-binding protein                               | 0    | 0    | 2    | 0    | 0    | 0    | 0    | 0    | 0    | 0    | 2    | 3    |
| K10555 Al-2 transport system substrate-binding protein                             | 651  | 663  | 638  | 637  | 457  | 511  | 448  | 469  | 823  | 868  | 765  | 857  |
| K10556 Al-2 transport system permease protein                                      | 666  | 612  | 597  | 652  | 418  | 465  | 456  | 459  | 887  | 818  | 809  | 863  |
| K10557 Al-2 transport system permease protein                                      | 663  | 577  | 538  | 637  | 500  | 453  | 429  | 498  | 742  | 702  | 772  | 786  |
| K10558 Al-2 transport system ATP-binding protein                                   | 1018 | 928  | 850  | 970  | 659  | 726  | 725  | 687  | 1258 | 1263 | 1259 | 1267 |
| K10559 rhamnose transport system substrate-binding protein                         | 732  | 690  | 663  | 764  | 436  | 544  | 492  | 458  | 820  | 902  | 823  | 893  |
| K10560 rhamnose transport system permease protein                                  | 634  | 638  | 548  | 651  | 464  | 529  | 430  | 452  | 826  | 893  | 820  | 849  |
| K10561 rhamnose transport system permease protein                                  | 626  | 607  | 658  | 640  | 402  | 416  | 444  | 435  | 830  | 815  | 749  | 780  |
| K10562 rhamnose transport system ATP-binding protein [EC:7.5.2.-]                  | 971  | 1032 | 957  | 1092 | 705  | 736  | 714  | 659  | 1216 | 1376 | 1203 | 1293 |
| K10823 oligopeptide transport system ATP-binding protein                           | 2717 | 2678 | 2653 | 2620 | 878  | 897  | 800  | 793  | 2781 | 3113 | 2881 | 3056 |
| K10824 nickel transport system ATP-binding protein [EC:7.2.2.11]                   | 536  | 571  | 554  | 629  | 478  | 462  | 463  | 434  | 735  | 760  | 841  | 784  |
| K10829 ferric hydroxamate transport system ATP-binding protein [EC:7.2.2.16]       | 654  | 713  | 612  | 690  | 479  | 467  | 477  | 487  | 719  | 724  | 832  | 858  |
| K10830 manganese/zinc transport system ATP-binding protein [EC:7.2.2.5]            | 35   | 36   | 33   | 46   | 2    | 4    | 9    | 5    | 43   | 49   | 29   | 44   |
| K11004 ATP-binding cassette, subfamily B, bacterial HlyB/CyxB                      | 16   | 6    | 9    | 11   | 5    | 5    | 13   | 3    | 126  | 125  | 123  | 129  |
| K11050 multidrug/hemolysin transport system ATP-binding protein                    | 8    | 6    | 13   | 9    | 0    | 2    | 3    | 3    | 13   | 11   | 8    | 10   |
| K11051 multidrug/hemolysin transport system permease protein                       | 3    | 3    | 5    | 3    | 2    | 3    | 0    | 4    | 11   | 12   | 8    | 8    |
| K11069 spermidine/putrescine transport system substrate-binding protein            | 4047 | 4125 | 4217 | 4157 | 4355 | 4057 | 4167 | 4281 | 3783 | 3881 | 3800 | 3789 |
| K11070 spermidine/putrescine transport system permease protein                     | 3718 | 3764 | 3752 | 3871 | 3335 | 3248 | 3220 | 3292 | 2712 | 2761 | 2833 | 2914 |
| K11071 spermidine/putrescine transport system permease protein                     | 4117 | 4067 | 3997 | 3992 | 3241 | 3289 | 3182 | 3386 | 3059 | 3085 | 3023 | 2967 |
| K11072 spermidine/putrescine transport system ATP-binding protein [EC:7.6.2.11]    | 5793 | 5782 | 5714 | 5778 | 5372 | 5378 | 5359 | 5353 | 4753 | 4609 | 4770 | 4703 |
| K11073 putrescine transport system substrate-binding protein                       | 9814 | 9998 | 9252 | 9772 | 5568 | 5291 | 5207 | 5640 | 3824 | 3884 | 3541 | 3705 |
| K11074 putrescine transport system permease protein                                | 1880 | 1766 | 1725 | 1721 | 1083 | 1057 | 1113 | 1087 | 1159 | 1134 | 1156 | 1065 |
| K11075 putrescine transport system permease protein                                | 2021 | 2159 | 2083 | 2159 | 1297 | 1319 | 1213 | 1299 | 1148 | 1136 | 1161 | 1119 |
| K11076 putrescine transport system ATP-binding protein                             | 2267 | 2190 | 2339 | 2242 | 1350 | 1431 | 1263 | 1395 | 1416 | 1444 | 1489 | 1453 |
| K11077 mannopine transport system substrate-binding protein                        | 2    | 0    | 0    | 0    | 0    | 0    | 0    | 2    | 0    | 4    | 0    | 0    |
| K11078 mannopine transport system permease protein                                 | 1    | 2    | 2    | 0    | 0    | 0    | 0    | 0    | 1    | 3    | 3    | 1    |
| K11079 mannopine transport system permease protein                                 | 0    | 0    | 0    | 0    | 0    | 0    | 0    | 0    | 0    | 1    | 2    | 1    |
| K11080 mannopine transport system ATP-binding protein                              | 0    | 0    | 1    | 1    | 7    | 0    | 0    | 2    | 2    | 1    | 3    | 0    |
| K11081 2-aminoethylphosphonate transport system substrate-binding protein          | 434  | 413  | 469  | 470  | 127  | 113  | 121  | 131  | 835  | 946  | 807  | 871  |
| K11082 2-aminoethylphosphonate transport system permease protein                   | 253  | 283  | 266  | 298  | 71   | 68   | 70   | 65   | 479  | 489  | 446  | 539  |
| K11083 2-aminoethylphosphonate transport system permease protein                   | 309  | 333  | 292  | 248  | 84   | 101  | 96   | 69   | 594  | 660  | 609  | 653  |
| K11084 2-aminoethylphosphonate transport system ATP-binding protein                | 492  | 491  | 427  | 540  | 151  | 161  | 124  | 134  | 964  | 1048 | 885  | 998  |
| K11085 ATP-binding cassette, subfamily B, bacterial MshA [EC:3.6.3.-]              | 2478 | 2726 | 2788 | 2660 | 1560 | 1560 | 1560 | 1560 | 5493 | 4693 | 4875 | 4969 |
| K11604 manganese/iron transport system substrate-binding protein                   | 371  | 375  | 350  | 412  | 98   | 100  | 110  | 102  | 786  | 844  | 757  | 753  |
| K11605 manganese/iron transport system permease protein                            | 316  | 328  | 322  | 333  | 84   | 73   | 93   | 91   | 626  | 718  | 579  | 625  |
| K11606 manganese/iron transport system permease protein                            | 267  | 286  | 233  | 224  | 75   | 92   | 103  | 89   | 522  | 566  | 564  | 590  |
| K11607 manganese/iron transport system ATP-binding protein                         | 335  | 319  | 310  | 361  | 70   | 86   | 90   | 91   | 555  | 662  | 572  | 648  |
| K11631 bacitracin transport system ATP-binding protein                             | 0    | 3    | 3    | 3    | 3    | 5    | 1    | 3    | 2    | 2    | 5    | 3    |
| K11632 bacitracin transport system permease protein                                | 2    | 3    | 0    | 1    | 0    | 0    | 0    | 0    | 0    | 0    | 0    | 0    |
| K11705 iron/zinc/manganese/copper transport system permease protein                | 0    | 0    | 0    | 0    | 0    | 0    | 0    | 0    | 1    | 0    | 0    | 1    |
| K11707 manganese/zinc/iron transport system substrate-binding protein              | 4    | 10   | 7    | 13   | 2    | 0    | 2    | 0    | 0    | 1    | 0    | 3    |
| K11708 manganese/zinc/iron transport system permease protein                       | 2    | 16   | 5    | 19   | 0    | 3    | 0    | 2    | 0    | 0    | 4    | 1    |
| K11709 manganese/zinc/iron transport system permease protein                       | 8    | 16   | 10   | 23   | 0    | 0    | 3    | 1    | 0    | 2    | 2    | 0    |
| K11710 manganese/zinc/iron transport system ATP-binding protein [EC:7.2.2.5]       | 7    | 16   | 5    | 15   | 3    | 4    | 1    | 0    | 0    | 2    | 0    | 3    |
| K11720 lipopolysaccharide export system permease protein                           | 2712 | 2636 | 2690 | 2789 | 3417 | 3561 | 3445 | 3184 | 2652 | 2747 | 2803 | 2631 |
| K11953 bicarbonate transport system ATP-binding protein [EC:3.6.3.-]               | 0    | 0    | 0    | 0    | 0    | 0    | 0    | 2    | 0    | 1    | 0    | 0    |
| K11955 neutral amino acid transport system permease protein                        | 0    | 0    | 0    | 1    | 0    | 0    | 0    | 0    | 0    | 0    | 0    | 0    |
| K11958 neutral amino acid transport system ATP-binding protein                     | 0    | 0    | 1    | 0    | 0    | 1    | 0    | 0    | 0    | 0    | 0    | 1    |
| K11959 urea transport system substrate-binding protein                             | 2731 | 2773 | 2642 | 2774 | 1360 | 1392 | 1337 | 1460 | 1960 | 1887 | 1851 | 1874 |
| K11960 urea transport system permease protein                                      | 3481 | 3212 | 3082 | 3362 | 1720 | 1594 | 1548 | 1634 | 2183 | 2208 | 2201 | 2193 |
| K11961 urea transport system permease protein                                      | 2023 | 1832 | 1773 | 1819 | 875  | 853  | 797  | 841  | 1416 | 1467 | 1395 | 1514 |
| K11962 urea transport system ATP-binding protein                                   | 1572 | 1565 | 1598 | 1718 | 727  | 680  | 702  | 801  | 1303 | 1163 | 1172 | 1266 |
| K11963 urea transport system ATP-binding protein                                   | 1490 | 1445 | 1381 | 1400 | 637  | 653  | 665  | 721  | 1045 | 1148 | 1113 | 1108 |
| K12368 dipeptide transport system substrate-binding protein                        | 9050 | 9007 | 8930 | 8954 | 5453 | 5432 | 5421 | 5754 | 3938 | 3966 | 3753 | 3792 |
| K12369 dipeptide transport system permease protein                                 | 2231 | 2235 | 2167 | 2115 | 1169 | 1278 | 1279 | 1286 | 1341 | 1464 | 1351 | 1476 |
| K12370 dipeptide transport system permease protein                                 | 1737 | 1757 | 1639 | 1753 | 1128 | 1109 | 1018 | 996  | 1143 | 1128 | 1156 | 1126 |
| K12371 dipeptide transport system ATP-binding protein                              | 2117 | 1909 | 1903 | 2064 | 1220 | 1222 | 1236 | 1167 | 1456 | 1318 | 1302 | 1337 |
| K12372 dipeptide transport system ATP-binding protein                              | 2113 | 2201 | 2082 | 2043 | 1233 | 1304 | 1228 | 1226 | 1328 | 1323 | 1247 | 1265 |
| K12536 ATP-binding cassette, subfamily C, bacterial exporter for protease/lipase   | 4110 | 4027 | 3615 | 3782 | 2115 | 1930 | 1898 | 2258 | 1268 | 1166 | 1041 | 1160 |
| K12541 ATP-binding cassette, subfamily C, bacterial LaxB                           | 4305 | 3982 | 3648 | 3962 | 2987 | 2939 | 2738 | 3068 | 1141 | 1017 | 989  | 1073 |
| K13409 ATP-binding cassette, subfamily B, bacterial RaxB                           | 4471 | 4504 | 4283 | 4386 | 2178 | 2241 | 2051 | 2258 | 2795 | 3111 | 2867 | 2966 |
| K13889 glutathione transport system substrate-binding protein                      | 1335 | 1288 | 1371 | 1349 | 1235 | 1362 | 1307 | 1313 | 1942 | 1908 | 1894 | 1999 |
| K13890 glutathione transport system permease protein                               | 541  | 571  | 527  | 599  | 425  | 443  | 408  | 434  | 677  | 733  | 691  | 722  |
| K13891 glutathione transport system permease protein                               | 579  | 604  | 569  | 556  | 440  | 455  | 384  | 431  | 780  | 801  | 738  | 743  |
| K13892 glutathione transport system ATP-binding protein                            | 1145 | 1195 | 1065 | 1166 | 843  | 857  | 808  | 770  | 1574 | 1616 | 1606 | 1657 |
| K13893 microcin C transport system substrate-binding protein                       | 7254 | 7335 | 7122 | 7214 | 4225 | 4138 | 3876 | 4182 | 3407 | 3270 | 3234 | 3416 |
| K13894 microcin C transport system permease protein                                | 3381 | 3511 | 3283 | 3487 | 1782 | 1881 | 1863 | 1985 | 1751 | 1765 | 1718 | 1709 |
| K13895 microcin C transport system permease protein                                | 3293 | 3074 | 2934 | 3035 | 1763 | 1678 | 1673 | 1779 | 1640 | 1486 | 1554 | 1525 |
| K13896 microcin C transport system ATP-binding protein                             | 3696 | 3704 | 3213 | 3397 | 1982 | 1910 | 1851 | 2140 | 2067 | 2101 | 2020 | 2131 |
| K14698 ATP-binding cassette, subfamily B, bacterial lra [EC:3.6.3.-]               | 1    | 0    | 1    | 0    | 0    | 0    | 0    | 1    | 0    | 0    | 0    | 0    |
| K14699 ATP-binding cassette, subfamily B, bacterial lra [EC:3.6.3.-]               | 17   | 18   | 19   | 22   | 8    | 10   | 1    | 0    | 1    | 4    | 8    | 9    |
| K15497 molybdate/lungate transport system ATP-binding protein [EC:7.3.2.5 7.3.2.6] | 0    | 0    | 0    | 0    | 0    | 0    | 0    | 0    | 1    | 0    | 1    | 0    |
| K15580 oligopeptide transport system substrate-binding protein                     | 5868 | 5926 | 5927 | 6258 | 2553 | 2656 | 2523 | 2388 | 5978 | 6768 | 6461 | 6479 |
| K15581 oligopeptide transport system permease protein                              | 1627 | 1578 | 1615 | 1588 | 505  | 579  | 572  | 525  | 1586 | 1834 | 1932 | 1868 |
| K15582 oligopeptide transport system permease protein                              | 1770 | 1658 | 1718 | 1826 | 521  | 638  | 461  | 510  | 1844 | 2110 | 1855 | 1972 |
| K15583 oligopeptide transport system ATP-binding protein                           | 2354 | 2281 | 2304 | 2407 | 805  | 800  | 785  | 674  | 2312 | 2657 | 2299 | 2453 |
| K15584 nickel transport system substrate-binding protein                           | 1236 | 1212 | 1136 | 1129 | 836  | 861  | 883  | 799  |      |      |      |      |

|                                                                                                         |       |       |       |       |      |      |      |      |       |       |       |       |
|---------------------------------------------------------------------------------------------------------|-------|-------|-------|-------|------|------|------|------|-------|-------|-------|-------|
| K16784 biotin transport system ATP-binding protein [EC:3.6.3.-]                                         | 0     | 2     | 0     | 0     | 4    | 3    | 2    | 2    | 6     | 5     | 7     | 0     |
| K16785 energy-coupling factor transport system permease protein                                         | 1679  | 1505  | 1694  | 1719  | 523  | 516  | 523  | 488  | 2110  | 2185  | 2033  | 2177  |
| K16786 energy-coupling factor transport system ATP-binding protein [EC:3.6.3.-]                         | 793   | 701   | 766   | 724   | 213  | 195  | 197  | 169  | 618   | 800   | 753   | 757   |
| K16787 energy-coupling factor transport system ATP-binding protein [EC:3.6.3.-]                         | 2391  | 2213  | 2272  | 2302  | 784  | 805  | 811  | 776  | 2586  | 2886  | 2788  | 2956  |
| K16905 fluoroquinolone transport system permease protein                                                | 561   | 498   | 575   | 567   | 63   | 103  | 82   | 67   | 408   | 463   | 454   | 495   |
| K16906 fluoroquinolone transport system permease protein                                                | 406   | 365   | 385   | 418   | 79   | 80   | 64   | 69   | 339   | 347   | 354   | 420   |
| K16907 fluoroquinolone transport system ATP-binding protein [EC:3.6.3.-]                                | 547   | 594   | 614   | 555   | 101  | 118  | 102  | 86   | 611   | 651   | 712   | 620   |
| K16915 nickel transport protein                                                                         | 14    | 13    | 19    | 16    | 14   | 14   | 15   | 19   | 13    | 9     | 27    | 19    |
| K16916 putative peptide transport system permease protein                                               | 0     | 0     | 0     | 2     | 0    | 0    | 0    | 2    | 0     | 0     | 0     | 0     |
| K16918 acetoin utilization transport system permease protein                                            | 0     | 0     | 0     | 0     | 0    | 0    | 0    | 2    | 0     | 0     | 0     | 0     |
| K16920 acetoin utilization transport system ATP-binding protein                                         | 0     | 0     | 0     | 0     | 0    | 0    | 0    | 0    | 0     | 0     | 1     | 0     |
| K16956 L-cystine transport system substrate-binding protein                                             | 0     | 2     | 1     | 2     | 0    | 0    | 0    | 0    | 0     | 2     | 0     | 0     |
| K16957 L-cystine transport system substrate-binding protein                                             | 56    | 57    | 55    | 58    | 1    | 4    | 6    | 0    | 27    | 22    | 29    | 31    |
| K16958 L-cystine transport system permease protein                                                      | 91    | 65    | 65    | 88    | 4    | 4    | 4    | 3    | 46    | 43    | 48    | 47    |
| K16959 L-cystine transport system permease protein                                                      | 23    | 30    | 38    | 35    | 8    | 3    | 7    | 6    | 30    | 22    | 28    | 31    |
| K16960 L-cystine transport system ATP-binding protein [EC:7.4.2.1]                                      | 200   | 191   | 158   | 225   | 15   | 17   | 29   | 20   | 110   | 125   | 119   | 141   |
| K16961 putative S-methylcysteine transport system substrate-binding protein                             | 126   | 124   | 127   | 110   | 2    | 7    | 3    | 10   | 82    | 76    | 80    | 84    |
| K16962 putative S-methylcysteine transport system permease protein                                      | 158   | 156   | 176   | 144   | 6    | 5    | 11   | 4    | 56    | 97    | 100   | 99    |
| K16963 putative S-methylcysteine transport system ATP-binding protein                                   | 227   | 188   | 188   | 193   | 8    | 11   | 9    | 4    | 94    | 121   | 114   | 137   |
| K17062 arginine/lysine/histidine/glutamine transport system substrate-binding and permease protein      | 1     | 2     | 0     | 2     | 1    | 1    | 2    | 0    | 1     | 4     | 2     | 3     |
| K17063 arginine/lysine/histidine/glutamine transport system ATP-binding protein [EC:7.4.2.1]            | 0     | 0     | 0     | 0     | 0    | 0    | 0    | 1    | 0     | 0     | 0     | 0     |
| K17073 putative lysine transport system substrate-binding protein                                       | 293   | 314   | 322   | 336   | 83   | 120  | 91   | 72   | 207   | 257   | 219   | 256   |
| K17074 putative lysine transport system permease protein                                                | 567   | 586   | 592   | 564   | 127  | 160  | 140  | 123  | 430   | 564   | 461   | 500   |
| K17076 putative lysine transport system ATP-binding protein [EC:3.6.3.-]                                | 508   | 486   | 499   | 521   | 159  | 118  | 134  | 118  | 402   | 459   | 385   | 415   |
| K17077 arginine/lysine/histidine transport system permease protein                                      | 478   | 510   | 500   | 532   | 138  | 138  | 126  | 125  | 415   | 489   | 451   | 424   |
| K17202 erythritol transport system substrate-binding protein                                            | 495   | 519   | 555   | 580   | 384  | 354  | 352  | 323  | 700   | 734   | 746   | 728   |
| K17203 erythritol transport system permease protein                                                     | 667   | 623   | 598   | 624   | 424  | 421  | 437  | 429  | 878   | 892   | 838   | 823   |
| K17204 erythritol transport system ATP-binding protein                                                  | 923   | 980   | 878   | 945   | 604  | 665  | 658  | 582  | 1219  | 1259  | 1134  | 1268  |
| K17205 putative xylitol transport system substrate-binding protein                                      | 3     | 2     | 1     | 1     | 0    | 4    | 0    | 0    | 7     | 6     | 3     | 5     |
| K17206 putative xylitol transport system permease protein                                               | 32    | 40    | 33    | 36    | 3    | 3    | 3    | 1    | 47    | 40    | 20    | 31    |
| K17207 putative xylitol transport system ATP-binding protein                                            | 1     | 1     | 1     | 1     | 2    | 1    | 0    | 2    | 0     | 10    | 5     | 4     |
| K17209 inositol transport system permease protein                                                       | 11    | 9     | 19    | 15    | 2    | 4    | 3    | 1    | 7     | 5     | 5     | 7     |
| K17210 inositol transport system ATP-binding protein                                                    | 3     | 1     | 1     | 2     | 2    | 2    | 1    | 0    | 0     | 0     | 2     | 1     |
| K17213 inositol transport system substrate-binding protein                                              | 718   | 749   | 698   | 784   | 186  | 163  | 217  | 188  | 1420  | 1440  | 1367  | 1550  |
| K17214 inositol transport system permease protein                                                       | 393   | 428   | 392   | 399   | 105  | 124  | 113  | 110  | 845   | 869   | 839   | 872   |
| K17215 inositol transport system ATP-binding protein                                                    | 673   | 766   | 624   | 687   | 207  | 217  | 191  | 192  | 1215  | 1213  | 1197  | 1291  |
| K17234 arabinosaccharide transport system substrate-binding protein                                     | 346   | 321   | 325   | 302   | 103  | 131  | 123  | 110  | 408   | 439   | 440   | 479   |
| K17235 arabinosaccharide transport system permease protein                                              | 366   | 294   | 322   | 303   | 100  | 83   | 108  | 100  | 420   | 403   | 374   | 421   |
| K17236 arabinosaccharide transport system permease protein                                              | 253   | 264   | 248   | 264   | 102  | 112  | 119  | 116  | 326   | 343   | 322   | 361   |
| K17237 inositol-phosphate transport system substrate-binding protein                                    | 3     | 0     | 0     | 3     | 4    | 6    | 0    | 2    | 2     | 1     | 5     | 2     |
| K17238 inositol-phosphate transport system permease protein                                             | 5     | 4     | 2     | 3     | 13   | 27   | 10   | 9    | 3     | 5     | 3     | 3     |
| K17239 inositol-phosphate transport system permease protein                                             | 2     | 2     | 0     | 3     | 14   | 8    | 1    | 13   | 1     | 5     | 3     | 3     |
| K17240 inositol-phosphate transport system ATP-binding protein                                          | 32    | 41    | 36    | 43    | 36   | 53   | 40   | 37   | 22    | 44    | 24    | 23    |
| K17241 alpha-1,4-digalacturonate transport system substrate-binding protein                             | 181   | 154   | 179   | 173   | 61   | 51   | 27   | 32   | 109   | 142   | 123   | 121   |
| K17242 alpha-1,4-digalacturonate transport system permease protein                                      | 251   | 235   | 197   | 226   | 55   | 59   | 45   | 45   | 159   | 159   | 126   | 152   |
| K17243 alpha-1,4-digalacturonate transport system permease protein                                      | 374   | 364   | 377   | 376   | 67   | 59   | 72   | 89   | 233   | 248   | 203   | 257   |
| K17244 putative chitobiose transport system substrate-binding protein                                   | 1     | 2     | 1     | 1     | 0    | 0    | 0    | 0    | 0     | 0     | 0     | 0     |
| K17245 putative chitobiose transport system permease protein                                            | 64    | 65    | 58    | 71    | 17   | 26   | 18   | 17   | 68    | 63    | 65    | 90    |
| K17246 putative chitobiose transport system permease protein                                            | 4     | 5     | 9     | 7     | 2    | 5    | 1    | 0    | 9     | 12    | 10    | 10    |
| K17311 trehalose transport system substrate-binding protein                                             | 1     | 1     | 5     | 3     | 0    | 0    | 0    | 1    | 0     | 0     | 3     | 0     |
| K17312 trehalose transport system permease protein                                                      | 3     | 2     | 4     | 3     | 1    | 1    | 1    | 0    | 3     | 2     | 5     | 8     |
| K17313 trehalose transport system permease protein                                                      | 1     | 2     | 5     | 1     | 1    | 0    | 1    | 2    | 0     | 0     | 0     | 1     |
| K17315 glucose/mannose transport system substrate-binding protein                                       | 2006  | 1850  | 1807  | 1836  | 1049 | 1011 | 1025 | 1049 | 633   | 543   | 526   | 589   |
| K17316 glucose/mannose transport system permease protein                                                | 1333  | 1391  | 1424  | 1384  | 780  | 719  | 702  | 826  | 452   | 384   | 410   | 404   |
| K17317 glucose/mannose transport system permease protein                                                | 1106  | 1132  | 1131  | 1085  | 611  | 603  | 607  | 655  | 369   | 356   | 349   | 317   |
| K17318 putative aldouronate transport system substrate-binding protein                                  | 9680  | 9526  | 9810  | 9727  | 2005 | 2019 | 2054 | 1975 | 13413 | 13975 | 13772 | 14136 |
| K17319 putative aldouronate transport system permease protein                                           | 11884 | 11815 | 12003 | 11855 | 2376 | 2394 | 2334 | 2297 | 16531 | 17696 | 17315 | 17904 |
| K17320 putative aldouronate transport system permease protein                                           | 11366 | 11243 | 11559 | 11595 | 2314 | 2269 | 2113 | 2060 | 15701 | 16901 | 16601 | 16970 |
| K17321 glycerol transport system substrate-binding protein                                              | 0     | 1     | 0     | 1     | 3    | 0    | 0    | 3    | 7     | 2     | 13    | 3     |
| K17322 glycerol transport system permease protein                                                       | 3     | 10    | 1     | 4     | 0    | 0    | 0    | 0    | 4     | 1     | 3     | 1     |
| K17323 glycerol transport system permease protein                                                       | 5     | 6     | 6     | 9     | 0    | 1    | 2    | 3    | 4     | 5     | 6     | 10    |
| K17324 glycerol transport system ATP-binding protein                                                    | 0     | 1     | 0     | 0     | 0    | 2    | 0    | 0    | 0     | 2     | 3     | 5     |
| K17325 glycerol transport system ATP-binding protein                                                    | 3     | 2     | 2     | 3     | 0    | 0    | 2    | 2    | 2     | 1     | 4     | 1     |
| K17326 xylobiose transport system substrate-binding protein                                             | 6     | 6     | 5     | 7     | 7    | 0    | 1    | 2    | 8     | 12    | 13    | 15    |
| K17327 xylobiose transport system permease protein                                                      | 0     | 2     | 2     | 2     | 3    | 0    | 0    | 0    | 0     | 4     | 2     | 1     |
| K17328 xylobiose transport system permease protein                                                      | 0     | 2     | 3     | 1     | 3    | 2    | 2    | 2    | 0     | 4     | 2     | 0     |
| K17329 N,N'-diacetylchitobiose transport system substrate-binding protein                               | 16    | 19    | 25    | 17    | 6    | 3    | 6    | 6    | 7     | 14    | 16    | 13    |
| K17330 N,N'-diacetylchitobiose transport system permease protein                                        | 9     | 8     | 9     | 7     | 3    | 3    | 1    | 1    | 10    | 3     | 14    | 10    |
| K17331 N,N'-diacetylchitobiose transport system permease protein                                        | 43    | 36    | 41    | 35    | 4    | 6    | 3    | 9    | 44    | 29    | 35    | 33    |
| K18104 ATP-binding cassette, subfamily B, bacterial AbcA/Bmra [EC:7.6.2.2]                              | 25    | 12    | 26    | 17    | 7    | 6    | 14   | 13   | 22    | 39    | 28    | 23    |
| K18216 ATP-binding cassette, subfamily B, tetracycline resistant protein                                | 3     | 3     | 3     | 9     | 0    | 0    | 0    | 0    | 1     | 0     | 2     | 0     |
| K18217 ATP-binding cassette, subfamily B, tetracycline resistant protein                                | 6     | 0     | 0     | 7     | 0    | 3    | 0    | 3    | 0     | 4     | 1     | 0     |
| K18230 macrolide transport system ATP-binding/permease protein                                          | 0     | 1     | 0     | 1     | 0    | 0    | 1    | 4    | 0     | 1     | 0     | 0     |
| K18231 macrolide transport system ATP-binding/permease protein                                          | 98    | 118   | 87    | 128   | 17   | 37   | 41   | 29   | 73    | 88    | 87    | 106   |
| K18887 ATP-binding cassette, subfamily B, multidrug efflux pump                                         | 618   | 563   | 567   | 561   | 123  | 154  | 120  | 116  | 443   | 468   | 484   | 517   |
| K18888 ATP-binding cassette, subfamily B, multidrug efflux pump                                         | 429   | 420   | 478   | 467   | 147  | 142  | 84   | 93   | 404   | 483   | 378   | 376   |
| K18889 ATP-binding cassette, subfamily B, multidrug efflux pump                                         | 1119  | 1145  | 1148  | 1243  | 757  | 720  | 851  | 786  | 1519  | 1610  | 1552  | 1583  |
| K18890 ATP-binding cassette, subfamily B, multidrug efflux pump                                         | 1264  | 1171  | 1209  | 1243  | 733  | 827  | 855  | 748  | 1743  | 1660  | 1653  | 1763  |
| K18891 ATP-binding cassette, subfamily B, multidrug efflux pump                                         | 79    | 118   | 107   | 88    | 14   | 26   | 28   | 30   | 86    | 110   | 71    | 97    |
| K18892 ATP-binding cassette, subfamily B, multidrug efflux pump                                         | 104   | 64    | 125   | 104   | 47   | 43   | 44   | 31   | 99    | 151   | 114   | 130   |
| K18893 ATP-binding cassette, subfamily B, multidrug efflux pump                                         | 2737  | 2631  | 2668  | 2588  | 1465 | 1468 | 1340 | 1464 | 922   | 827   | 795   | 816   |
| K18895 ATP-binding cassette, subfamily B, salmochelin/enterobactin exporter                             | 12    | 9     | 5     | 7     | 8    | 2    | 8    | 5    | 221   | 175   | 204   | 213   |
| K19083 bacitracin transport system ATP-binding protein                                                  | 0     | 0     | 1     | 0     | 0    | 0    | 0    | 0    | 0     | 1     | 1     | 0     |
| K19226 cationic peptide transport system substrate-binding protein                                      | 850   | 838   | 841   | 928   | 616  | 668  | 619  | 570  | 1259  | 1238  | 1223  | 1323  |
| K19227 cationic peptide transport system permease protein                                               | 462   | 470   | 466   | 546   | 305  | 341  | 343  | 319  | 683   | 736   | 638   | 732   |
| K19228 cationic peptide transport system permease protein                                               | 508   | 443   | 499   | 490   | 276  | 319  | 371  | 308  | 663   | 650   | 665   | 661   |
| K19229 cationic peptide transport system ATP-binding protein                                            | 521   | 521   | 498   | 524   | 350  | 396  | 379  | 389  | 782   | 818   | 786   | 787   |
| K19230 cationic peptide transport system ATP-binding protein                                            | 450   | 431   | 467   | 461   | 273  | 340  | 318  | 297  | 618   | 618   | 640   | 681   |
| K19309 bacitracin transport system ATP-binding protein                                                  | 467   | 420   | 429   | 433   | 41   | 49   | 49   | 24   | 414   | 420   | 394   | 434   |
| K19310 bacitracin transport system permease protein                                                     | 395   | 401   | 410   | 449   | 40   | 31   | 34   | 27   | 400   | 433   | 407   | 433   |
| K19340 Cu-processing system ATP-binding protein                                                         | 1510  | 1468  | 1289  | 1390  | 740  | 679  | 701  | 819  | 458   | 352   | 401   | 415   |
| K19341 Cu-processing system permease protein                                                            | 1193  | 1085  | 1012  | 1109  | 486  | 596  | 602  | 747  | 335   | 285   | 333   | 321   |
| K19349 pleuromutilin/lincosamide/streptogramin A transport system ATP-binding/permease protein          | 6     | 12    | 7     | 11    | 0    | 0    | 0    | 0    | 21    | 20    | 20    | 18    |
| K19350 lincosamide and streptogramin A transport system ATP-binding/permease protein                    | 205   | 246   | 217   | 241   | 83   | 98   | 85   | 79   | 343   | 386   | 338   | 386   |
| K19971 manganese/zinc transport system substrate-binding protein                                        | 53    | 71    | 51    | 81    | 3    | 10   | 3    | 3    | 41    | 57    | 38    | 54    |
| K19972 manganese/zinc transport system permease protein                                                 | 28    | 27    | 53    | 45    | 9    | 10   | 8    | 3    | 39    | 50    | 45    | 43    |
| K19973 manganese transport system ATP-binding protein [EC:7.2.2.5]                                      | 37    | 30    | 48    | 51    | 19   | 9    | 15   | 12   | 30    | 62    | 44    | 47    |
| K19975 manganese transport system substrate-binding protein                                             | 45    | 45    | 63    | 64    | 9    | 10   | 8    | 4    | 50    | 36    | 36    | 65    |
| K19976 manganese transport system permease protein                                                      | 44    | 56    | 35    | 35    | 17   | 21   | 31   | 20   | 49    | 66    | 40    | 45    |
| K20344 ATP-binding cassette, subfamily C, bacteriocin exporter                                          | 328   | 342   | 385   | 340   | 418  | 459  | 468  | 418  | 169   | 239   | 190   | 248   |
| K20386 ATP-binding cassette, subfamily B, bacterial CylB                                                | 131   | 185   | 170   | 151   | 3    | 6    | 12   | 13   | 11    | 15    | 12    | 11    |
| K20459 antibiotic transport system ATP-binding protein                                                  | 166   | 156   | 173   | 163   | 66   | 39   | 41   | 43   | 283   | 276   | 267   | 291   |
| K20460 antibiotic transport system permease protein                                                     | 68    | 70    | 83    | 61    | 39   | 31   | 40   | 29   | 101   | 130   | 112   | 163   |
| K20461 antibiotic transport system permease protein                                                     | 117   | 114   | 136   | 118   | 38   | 44   | 46   | 44   | 199   | 210   | 208   | 206   |
| K20490 antibiotic transport system ATP-binding protein                                                  | 72    | 59    | 74    | 53    | 46   | 51   | 43   | 38   | 106   | 85    | 73    | 88    |
| K20491 antibiotic transport system permease protein                                                     | 75    | 51    | 60    | 64    | 38   | 42   | 46   | 30   | 90    | 106   | 90    | 95    |
| K20492 antibiotic transport system permease protein                                                     | 63    | 59    | 45    | 45    | 25   | 20   | 35   | 36   | 61    | 92    | 102   | 123   |
| K23055 putative lysine/arginine/ornithine/histidine/octopine transport system substrate-binding protein | 79    | 65    | 72    | 62    | 51   | 57   | 29   | 51   | 21    | 22    | 29    | 28    |
| K23056 putative lysine/arginine/ornithine/histidine/octopine transport system permease protein          | 1278  | 1172  | 1144  | 1292  | 697  | 652  | 591  | 643  | 374   | 468   | 377   | 387   |
| K23057 putative lysine/arginine/ornithine/histidine/octopine transport system permease protein          | 1063  | 1130  | 1077  |       |      |      |      |      |       |       |       |       |

|                                                                                     |        |        |        |        |        |        |        |        |        |        |        |        |
|-------------------------------------------------------------------------------------|--------|--------|--------|--------|--------|--------|--------|--------|--------|--------|--------|--------|
| K23185 ferric enterobactin transport system substrate-binding protein               | 541    | 605    | 436    | 574    | 394    | 406    | 395    | 414    | 744    | 825    | 785    | 784    |
| K23186 ferric enterobactin transport system permease protein                        | 588    | 502    | 472    | 572    | 396    | 454    | 427    | 358    | 728    | 718    | 719    | 783    |
| K23187 ferric enterobactin transport system permease protein                        | 628    | 537    | 481    | 550    | 413    | 371    | 390    | 374    | 772    | 776    | 679    | 848    |
| K23188 ferric enterobactin transport system ATP-binding protein [EC:7.2.2.17]       | 587    | 636    | 561    | 595    | 393    | 414    | 381    | 411    | 738    | 737    | 702    | 751    |
| K23227 ferric hydroxamate transport system substrate-binding protein                | 575    | 533    | 530    | 597    | 361    | 420    | 353    | 378    | 888    | 857    | 832    | 811    |
| K23228 ferric hydroxamate transport system permease protein                         | 1162   | 1148   | 1012   | 1230   | 960    | 938    | 819    | 859    | 1493   | 1528   | 1485   | 1597   |
| ko02060 Phosphotransferase system (PTS)                                             | 60928  | 59813  | 58541  | 61350  | 37321  | 38082  | 37156  | 36742  | 66414  | 70443  | 66735  | 69633  |
| K02757 PTS system, beta-glucoside-specific IIC component                            | 3583   | 3454   | 3436   | 3590   | 2480   | 2627   | 2532   | 2287   | 2783   | 3113   | 2751   | 2912   |
| K02784 phosphocarrier protein HPr                                                   | 143    | 157    | 193    | 150    | 107    | 98     | 126    | 124    | 240    | 242    | 240    | 217    |
| K02806 PTS system, nitrogen regulatory IIA component [EC:2.7.1.-]                   | 1131   | 1124   | 1011   | 1130   | 665    | 675    | 639    | 744    | 696    | 734    | 659    | 679    |
| K08483 phosphotransferase system, enzyme I, PtsI [EC:2.7.3.9]                       | 1980   | 1872   | 2001   | 2019   | 1128   | 1192   | 1203   | 1097   | 2345   | 2657   | 2402   | 2470   |
| K08484 phosphotransferase system, enzyme I, PtsP [EC:2.7.3.9]                       | 5022   | 4883   | 4614   | 4885   | 2967   | 2906   | 2937   | 3070   | 3073   | 3027   | 2846   | 3100   |
| K08485 phosphocarrier protein NPr                                                   | 161    | 161    | 176    | 178    | 109    | 128    | 123    | 94     | 222    | 277    | 249    | 230    |
| K11183 phosphocarrier protein FPr                                                   | 1193   | 1090   | 1054   | 1075   | 671    | 712    | 709    | 739    | 1113   | 1201   | 1106   | 1175   |
| K11200 PTS system, 2-O-A-mannosyl-D-glycerate-specific IIC component                | 4      | 7      | 3      | 5      | 19     | 16     | 18     | 26     | 6      | 10     | 17     | 8      |
| K19506 PTS system, fructoselysine/glucoselysine-specific IIA component [EC:2.7.1.-] | 308    | 316    | 283    | 328    | 68     | 79     | 57     | 63     | 442    | 539    | 483    | 471    |
| K19507 PTS system, fructoselysine/glucoselysine-specific IIB component [EC:2.7.1.-] | 327    | 330    | 359    | 348    | 87     | 90     | 127    | 76     | 522    | 529    | 474    | 521    |
| K19508 PTS system, fructoselysine/glucoselysine-specific IIC component              | 619    | 601    | 573    | 674    | 127    | 156    | 148    | 155    | 885    | 935    | 814    | 907    |
| K19509 PTS system, fructoselysine/glucoselysine-specific IID component              | 902    | 921    | 896    | 888    | 176    | 172    | 171    | 171    | 931    | 1050   | 943    | 1009   |
| K20112 PTS system, galactose-specific IIA component [EC:2.7.1.204]                  | 29     | 30     | 26     | 27     | 0      | 7      | 1      | 3      | 21     | 16     | 33     | 15     |
| K20113 PTS system, galactose-specific IIB component [EC:2.7.1.204]                  | 5      | 22     | 19     | 11     | 3      | 5      | 0      | 2      | 11     | 12     | 14     | 12     |
| K20114 PTS system, galactose-specific IIC component                                 | 66     | 47     | 76     | 84     | 16     | 16     | 24     | 16     | 61     | 88     | 71     | 80     |
| ko03070 Bacterial secretion system                                                  | 196395 | 195950 | 188110 | 191797 | 135823 | 135607 | 131661 | 137413 | 126014 | 124728 | 121059 | 124342 |
| K02452 general secretion pathway protein C                                          | 1997   | 1941   | 1703   | 1893   | 957    | 952    | 866    | 960    | 1197   | 1203   | 1073   | 1257   |
| K02453 general secretion pathway protein D                                          | 10056  | 9959   | 9079   | 9366   | 4893   | 4857   | 4591   | 5256   | 4562   | 4546   | 4268   | 4511   |
| K02454 general secretion pathway protein E [EC:7.4.2.8]                             | 7020   | 7015   | 6450   | 6689   | 3444   | 3402   | 3400   | 3687   | 3381   | 3247   | 3139   | 3221   |
| K02455 general secretion pathway protein F                                          | 4872   | 4697   | 4366   | 4395   | 2400   | 2183   | 2113   | 2543   | 2556   | 2268   | 2285   | 2451   |
| K02456 general secretion pathway protein G                                          | 2645   | 2612   | 2544   | 2654   | 1311   | 1203   | 1153   | 1246   | 1191   | 1216   | 1106   | 1158   |
| K02457 general secretion pathway protein H                                          | 1422   | 1483   | 1352   | 1343   | 740    | 623    | 647    | 751    | 795    | 858    | 741    | 748    |
| K02458 general secretion pathway protein I                                          | 1848   | 1651   | 1582   | 1714   | 987    | 888    | 855    | 903    | 800    | 803    | 769    | 795    |
| K02459 general secretion pathway protein J                                          | 2988   | 2992   | 2671   | 2811   | 1520   | 1469   | 1328   | 1553   | 1411   | 1260   | 1171   | 1328   |
| K02460 general secretion pathway protein K                                          | 3033   | 2986   | 2819   | 2924   | 1488   | 1466   | 1390   | 1522   | 1714   | 1605   | 1542   | 1768   |
| K02461 general secretion pathway protein L                                          | 4283   | 4211   | 3641   | 3977   | 1954   | 1956   | 1940   | 2150   | 2394   | 2094   | 2013   | 2227   |
| K02462 general secretion pathway protein M                                          | 1575   | 1474   | 1347   | 1527   | 794    | 740    | 697    | 769    | 778    | 759    | 708    | 869    |
| K02464 general secretion pathway protein O [EC:3.4.23.43 2.1.1.-]                   | 318    | 383    | 282    | 295    | 81     | 92     | 75     | 82     | 650    | 692    | 673    | 688    |
| K02465 general secretion pathway protein S                                          | 144    | 150    | 171    | 185    | 37     | 41     | 40     | 32     | 303    | 316    | 283    | 318    |
| K03194 type IV secretion system protein VirB1                                       | 261    | 250    | 226    | 241    | 60     | 78     | 63     | 73     | 546    | 532    | 468    | 498    |
| K03195 type IV secretion system protein VirB10                                      | 368    | 396    | 363    | 414    | 91     | 108    | 81     | 109    | 826    | 751    | 732    | 786    |
| K03196 type IV secretion system protein VirB11 [EC:7.4.2.8]                         | 338    | 363    | 340    | 373    | 127    | 118    | 93     | 107    | 718    | 845    | 784    | 813    |
| K03197 type IV secretion system protein VirB2                                       | 111    | 109    | 97     | 138    | 30     | 36     | 26     | 11     | 218    | 203    | 213    | 224    |
| K03198 type IV secretion system protein VirB3                                       | 0      | 0      | 0      | 0      | 0      | 0      | 0      | 0      | 3      | 3      | 0      | 2      |
| K03199 type IV secretion system protein VirB4 [EC:7.4.2.8]                          | 941    | 982    | 1029   | 1041   | 273    | 289    | 274    | 263    | 2076   | 2407   | 2219   | 2147   |
| K03200 type IV secretion system protein VirB5                                       | 244    | 241    | 277    | 258    | 58     | 77     | 67     | 75     | 543    | 553    | 575    | 574    |
| K03201 type IV secretion system protein VirB6                                       | 358    | 371    | 401    | 415    | 108    | 114    | 95     | 106    | 782    | 882    | 811    | 792    |
| K03202 type IV secretion system protein VirB7                                       | 0      | 1      | 1      | 0      | 0      | 0      | 0      | 2      | 0      | 0      | 0      | 0      |
| K03203 type IV secretion system protein VirB8                                       | 233    | 233    | 248    | 231    | 46     | 76     | 66     | 57     | 461    | 474    | 408    | 463    |
| K03204 type IV secretion system protein VirB9                                       | 366    | 377    | 379    | 330    | 98     | 109    | 108    | 105    | 726    | 832    | 670    | 788    |
| K03205 type IV secretion system protein VirD4 [EC:7.4.2.8]                          | 9143   | 9101   | 9102   | 8845   | 4544   | 4597   | 4258   | 4384   | 4998   | 5468   | 5298   | 5521   |
| K03219 type III secretion protein C                                                 | 2641   | 2708   | 2581   | 2628   | 1509   | 1411   | 1296   | 1353   | 754    | 791    | 762    | 777    |
| K03221 type III secretion protein F                                                 | 326    | 347    | 338    | 362    | 180    | 159    | 201    | 217    | 94     | 119    | 88     | 94     |
| K03222 type III secretion protein J                                                 | 1036   | 1027   | 933    | 1034   | 557    | 511    | 517    | 550    | 357    | 317    | 330    | 349    |
| K03223 type III secretion protein L                                                 | 43     | 40     | 30     | 41     | 18     | 16     | 10     | 17     | 11     | 7      | 13     | 9      |
| K03224 ATP synthase in type III secretion protein N [EC:7.4.2.8]                    | 1288   | 1315   | 1270   | 1361   | 719    | 708    | 660    | 752    | 457    | 373    | 401    | 387    |
| K03225 type III secretion protein Q                                                 | 1406   | 1287   | 1253   | 1217   | 670    | 684    | 698    | 750    | 394    | 404    | 373    | 397    |
| K03226 type III secretion protein R                                                 | 935    | 920    | 787    | 859    | 505    | 496    | 489    | 477    | 290    | 273    | 245    | 300    |
| K03227 type III secretion protein S                                                 | 321    | 326    | 297    | 320    | 213    | 142    | 143    | 128    | 66     | 93     | 77     | 88     |
| K03228 type III secretion protein T                                                 | 873    | 727    | 741    | 740    | 393    | 420    | 527    | 622    | 251    | 199    | 202    | 227    |
| K03229 type III secretion protein U                                                 | 1372   | 1358   | 1271   | 1283   | 662    | 743    | 696    | 765    | 475    | 399    | 396    | 439    |
| K03230 type III secretion protein V                                                 | 299    | 290    | 267    | 250    | 156    | 195    | 187    | 175    | 106    | 95     | 95     | 89     |
| K04056 type III secretion protein Q                                                 | 235    | 248    | 256    | 259    | 159    | 151    | 196    | 205    | 73     | 77     | 60     | 83     |
| K04057 type III secretion protein P                                                 | 166    | 308    | 277    | 312    | 151    | 189    | 131    | 161    | 107    | 95     | 87     | 105    |
| K04058 type III secretion protein W                                                 | 87     | 72     | 88     | 80     | 44     | 49     | 71     | 87     | 30     | 31     | 21     | 16     |
| K04059 type III secretion protein X                                                 | 589    | 495    | 551    | 504    | 241    | 291    | 291    | 286    | 136    | 144    | 144    | 189    |
| K11003 hemolysin D                                                                  | 10     | 3      | 5      | 7      | 7      | 2      | 5      | 0      | 67     | 67     | 74     | 89     |
| K11891 type VI secretion system protein Impl                                        | 19635  | 19375  | 18382  | 19132  | 11317  | 11006  | 10706  | 11572  | 9536   | 9422   | 8474   | 9226   |
| K11892 type VI secretion system protein ImpK                                        | 4963   | 4873   | 4359   | 4684   | 2868   | 2840   | 2705   | 2922   | 2267   | 2182   | 2170   | 2241   |
| K11903 type VI secretion system secreted protein Hcp                                | 2669   | 2663   | 2558   | 2535   | 1564   | 1617   | 1492   | 1616   | 1488   | 1323   | 1419   | 1419   |
| K11904 type VI secretion system secreted protein VgrG                               | 28524  | 28444  | 27959  | 28775  | 16304  | 16426  | 14901  | 15661  | 11992  | 11726  | 11627  | 11929  |
| K11906 type VI secretion system protein VasD                                        | 2051   | 1977   | 1832   | 1845   | 1161   | 1057   | 1108   | 1107   | 1175   | 1162   | 1092   | 1136   |
| K11907 type VI secretion system protein VasG                                        | 13354  | 13568  | 12620  | 12864  | 8095   | 8383   | 7688   | 8190   | 5367   | 5446   | 5303   | 5438   |
| K11912 serine/threonine-protein kinase PpkA [EC:2.7.11.1]                           | 3564   | 3692   | 3156   | 3223   | 1850   | 1750   | 1621   | 1957   | 1225   | 982    | 994    | 1128   |
| K11913 type VI secretion system protein                                             | 1861   | 1894   | 1566   | 1652   | 963    | 907    | 976    | 1114   | 684    | 549    | 567    | 584    |
| K11915 serine/threonine protein phosphatase Stp1 [EC:3.1.3.16]                      | 828    | 852    | 773    | 748    | 397    | 420    | 389    | 540    | 292    | 276    | 273    | 242    |
| K12340 outer membrane protein                                                       | 6053   | 6403   | 6047   | 6105   | 7792   | 7869   | 8112   | 8336   | 6229   | 6003   | 6091   | 6137   |
| Signal transduction                                                                 | 635989 | 629723 | 616992 | 628286 | 464972 | 468313 | 454285 | 465392 | 457522 | 459896 | 452900 | 462323 |
| ko02020 Two-component system                                                        | 573175 | 567064 | 554878 | 565370 | 405596 | 407925 | 395160 | 406201 | 400438 | 402988 | 396038 | 404778 |
| K03273 nitrate reductase molybdenum cofactor assembly chaperone NarJ/NarH           | 1203   | 1197   | 1214   | 1246   | 660    | 628    | 604    | 620    | 1336   | 1298   | 1270   | 1340   |
| K00575 chemotaxis protein methyltransferase CheR [EC:2.1.1.80]                      | 1007   | 1058   | 968    | 984    | 586    | 627    | 611    | 628    | 727    | 828    | 770    | 729    |
| K00990 [protein-PilI] uridylyltransferase [EC:2.7.7.59]                             | 5846   | 5799   | 5887   | 5891   | 3794   | 3826   | 3585   | 3552   | 3709   | 3822   | 3730   | 3876   |
| K01104 protein-tyrosine phosphatase [EC:3.1.3.48]                                   | 1739   | 1781   | 1749   | 1683   | 1825   | 1849   | 1788   | 1744   | 1863   | 1914   | 1870   | 1823   |
| K01467 beta-lactamase class C [EC:3.5.2.6]                                          | 4      | 12     | 4      | 1      | 9      | 13     | 18     | 16     | 59     | 78     | 72     | 61     |
| K01545 potassium-transporting ATPase KdpF subunit                                   | 255    | 269    | 257    | 214    | 154    | 148    | 143    | 161    | 83     | 84     | 58     | 91     |
| K01546 potassium-transporting ATPase potassium-binding subunit                      | 4681   | 4743   | 4778   | 4638   | 5447   | 5568   | 5556   | 5511   | 5831   | 5942   | 6142   | 5851   |
| K01547 potassium-transporting ATPase ATP-binding subunit [EC:7.2.2.6]               | 6384   | 6442   | 6277   | 6173   | 6839   | 6599   | 6799   | 6774   | 6674   | 6701   | 6769   | 6628   |
| K01548 potassium-transporting ATPase KdpC subunit                                   | 1639   | 1681   | 1463   | 1622   | 1817   | 1718   | 1662   | 1760   | 1750   | 1630   | 1806   | 1682   |
| K01643 citrate lyase subunit alpha / citrate CoA-transferase [EC:2.8.3.10]          | 2215   | 2057   | 2018   | 2201   | 1587   | 1522   | 1457   | 1590   | 3000   | 3135   | 2889   | 3147   |
| K01644 citrate lyase subunit beta / citryl-CoA lyase [EC:4.1.3.34]                  | 1279   | 1204   | 1137   | 1232   | 829    | 838    | 913    | 788    | 1679   | 1853   | 1660   | 1728   |
| K01646 citrate lyase subunit gamma (acyl carrier protein)                           | 393    | 428    | 424    | 388    | 262    | 310    | 277    | 319    | 580    | 576    | 553    | 564    |
| K01910 [citrate (pro-3S)-lyase] lyase [EC:6.2.1.22]                                 | 1325   | 1377   | 1404   | 1461   | 953    | 1064   | 1005   | 954    | 2005   | 2097   | 1897   | 1992   |
| K01991 polysaccharide biosynthesis/export protein                                   | 1639   | 1737   | 1927   | 1739   | 3526   | 3493   | 3633   | 3528   | 2772   | 2741   | 2642   | 2675   |
| K02106 short-chain fatty acids transporter                                          | 1166   | 1190   | 1162   | 1158   | 665    | 611    | 595    | 673    | 538    | 506    | 519    | 507    |
| K02253 competence protein ComX                                                      | 0      | 0      | 0      | 2      | 0      | 0      | 0      | 0      | 0      | 0      | 0      | 0      |
| K02313 chromosomal replication initiator protein                                    | 5654   | 5570   | 5696   | 5718   | 5497   | 5710   | 5770   | 5762   | 5510   | 5350   | 5596   | 5472   |
| K02398 negative regulator of flagellin synthesis FlgM                               | 348    | 379    | 371    | 385    | 278    | 285    | 377    | 359    | 146    | 176    | 140    | 178    |
| K02402 flagellar transcriptional activator FlhC                                     | 119    | 90     | 89     | 124    | 138    | 179    | 206    | 180    | 38     | 27     | 34     | 27     |
| K02403 flagellar transcriptional activator FlhD                                     | 137    | 124    | 112    | 99     | 180    | 188    | 156    | 174    | 27     | 25     | 12     | 26     |
| K02405 RNA polymerase sigma factor for flagellar operon FlhA                        | 1624   | 1606   | 1622   | 1620   | 901    | 935    | 860    | 944    | 761    | 865    | 774    | 775    |
| K02406 flagellin                                                                    | 1133   | 1080   | 1101   | 1137   | 1042   | 1085   | 1172   | 1120   | 509    | 615    | 505    | 515    |
| K02487 type IV pill sensor histidine kinase and response regulator                  | 1425   | 1259   | 1392   | 1360   | 1160   | 1186</ |        |        |        |        |        |        |

|                                                                                                                  |       |       |       |       |      |      |      |      |      |      |      |      |
|------------------------------------------------------------------------------------------------------------------|-------|-------|-------|-------|------|------|------|------|------|------|------|------|
| K03739 membrane protein involved in D-alanine export                                                             | 364   | 304   | 369   | 354   | 408  | 410  | 347  | 319  | 184  | 229  | 187  | 203  |
| K03740 D-alanine transfer protein                                                                                | 345   | 389   | 353   | 405   | 382  | 404  | 407  | 345  | 141  | 219  | 234  | 224  |
| K03776 aerotaxis receptor                                                                                        | 2704  | 2651  | 2717  | 2803  | 2201 | 2371 | 2140 | 2310 | 794  | 716  | 657  | 739  |
| K04751 nitrogen regulatory protein P-II 1                                                                        | 654   | 688   | 678   | 665   | 976  | 906  | 933  | 907  | 980  | 1073 | 1034 | 1059 |
| K04771 serine protease Do [EC:3.4.21.107]                                                                        | 4021  | 3942  | 3976  | 4213  | 2224 | 2042 | 2155 | 2320 | 2934 | 3065 | 2982 | 3131 |
| K05338 holin-like protein                                                                                        | 37    | 40    | 29    | 20    | 3    | 2    | 0    | 3    | 18   | 25   | 29   | 23   |
| K05339 holin-like protein LrgB                                                                                   | 32    | 33    | 55    | 37    | 0    | 9    | 5    | 5    | 30   | 57   | 25   | 58   |
| K05874 methyl-accepting chemotaxis protein I, serine sensor receptor                                             | 1054  | 1089  | 915   | 993   | 1439 | 1589 | 1398 | 1397 | 79   | 92   | 92   | 85   |
| K05875 methyl-accepting chemotaxis protein II, aspartate sensor receptor                                         | 1214  | 1234  | 1185  | 1240  | 1825 | 1826 | 1731 | 1536 | 88   | 72   | 77   | 74   |
| K05876 methyl-accepting chemotaxis protein III, ribose and galactose sensor receptor                             | 286   | 312   | 294   | 336   | 419  | 454  | 434  | 447  | 11   | 15   | 10   | 12   |
| K05877 methyl-accepting chemotaxis protein IV, peptide sensor receptor                                           | 263   | 301   | 373   | 308   | 427  | 471  | 371  | 332  | 11   | 12   | 18   | 17   |
| K05964 holo-ACP synthase [EC:2.7.7.61]                                                                           | 506   | 484   | 479   | 513   | 375  | 439  | 426  | 440  | 537  | 571  | 557  | 571  |
| K05966 triphosphoribosyl-dephospho-CoA synthase [EC:4.2.4.52]                                                    | 1206  | 1138  | 1056  | 1147  | 753  | 785  | 756  | 706  | 1436 | 1644 | 1596 | 1640 |
| K06080 RcsF protein                                                                                              | 236   | 246   | 209   | 219   | 163  | 208  | 132  | 160  | 299  | 369  | 308  | 364  |
| K06596 chemosensory pili system protein ChpA (sensor histidine kinase/response regulator)                        | 10787 | 10711 | 9807  | 10448 | 6017 | 5761 | 5568 | 6414 | 3468 | 3436 | 3240 | 3338 |
| K06597 chemosensory pili system protein ChpB (putative protein-glutamate methyltransferase)                      | 1682  | 1589  | 1510  | 1602  | 838  | 887  | 864  | 956  | 596  | 519  | 447  | 488  |
| K06598 chemosensory pili system protein ChpC                                                                     | 789   | 724   | 709   | 679   | 402  | 381  | 379  | 452  | 247  | 296  | 248  | 224  |
| K07165 transmembrane sensor                                                                                      | 11201 | 11026 | 10136 | 10621 | 5792 | 5595 | 5582 | 6171 | 3509 | 3182 | 3131 | 3203 |
| K07636 two-component system, OmpR family, phosphate regulon sensor histidine kinase PhoR [EC:2.7.13.3]           | 5436  | 5371  | 5230  | 5269  | 6181 | 6321 | 6253 | 6123 | 5350 | 5438 | 5254 | 5301 |
| K07637 two-component system, OmpR family, sensor histidine kinase PhoQ [EC:2.7.13.3]                             | 2514  | 2553  | 2418  | 2480  | 1419 | 1538 | 1360 | 1547 | 1580 | 1721 | 1630 | 1704 |
| K07638 two-component system, OmpR family, osmolarity sensor histidine kinase EnvZ [EC:2.7.13.3]                  | 2667  | 2564  | 2445  | 2536  | 1717 | 1698 | 1529 | 1637 | 1828 | 1792 | 1846 | 1845 |
| K07639 two-component system, OmpR family, sensor histidine kinase RstB [EC:2.7.13.3]                             | 3005  | 2905  | 2744  | 3013  | 1633 | 1711 | 1578 | 1754 | 1631 | 1778 | 1606 | 1757 |
| K07640 two-component system, OmpR family, sensor histidine kinase CpxA [EC:2.7.13.3]                             | 902   | 901   | 888   | 945   | 663  | 674  | 693  | 671  | 1254 | 1220 | 1253 | 1305 |
| K07641 two-component system, OmpR family, sensor histidine kinase CrcC [EC:2.7.13.3]                             | 1888  | 1911  | 1951  | 1895  | 1237 | 1190 | 1213 | 1188 | 1460 | 1498 | 1346 | 1578 |
| K07642 two-component system, OmpR family, sensor histidine kinase BaeS [EC:2.7.13.3]                             | 835   | 758   | 756   | 792   | 533  | 573  | 572  | 575  | 1122 | 1184 | 1100 | 1188 |
| K07643 two-component system, OmpR family, sensor histidine kinase BaeS [EC:2.7.13.3]                             | 605   | 604   | 605   | 703   | 436  | 417  | 459  | 427  | 838  | 953  | 881  | 896  |
| K07644 two-component system, OmpR family, heavy metal sensor histidine kinase CusS [EC:2.7.13.3]                 | 12082 | 11941 | 11475 | 11882 | 7896 | 8077 | 7446 | 7698 | 4511 | 4263 | 4286 | 4445 |
| K07645 two-component system, OmpR family, sensor histidine kinase QsoC [EC:2.7.13.3]                             | 2904  | 2923  | 2697  | 2902  | 1497 | 1433 | 1386 | 1504 | 1753 | 1827 | 1796 | 1958 |
| K07646 two-component system, OmpR family, sensor histidine kinase KdpD [EC:2.7.13.3]                             | 7688  | 7460  | 7132  | 7380  | 5527 | 5448 | 5583 | 5753 | 7249 | 7325 | 7202 | 7356 |
| K07647 two-component system, OmpR family, sensor histidine kinase TorS [EC:2.7.13.3]                             | 7     | 11    | 10    | 14    | 20   | 19   | 29   | 25   | 130  | 194  | 179  | 166  |
| K07648 two-component system, OmpR family, aerobic respiration control sensor histidine kinase ArcB [EC:2.7.13.3] | 1322  | 1290  | 1266  | 1369  | 971  | 1050 | 999  | 1015 | 1749 | 1674 | 1689 | 1710 |
| K07649 two-component system, OmpR family, sensor histidine kinase TctE [EC:2.7.13.3]                             | 2258  | 2167  | 2102  | 2130  | 1163 | 1132 | 1177 | 1208 | 704  | 724  | 609  | 756  |
| K07650 two-component system, OmpR family, sensor histidine kinase CusS [EC:2.7.13.3]                             | 0     | 0     | 2     | 1     | 2    | 2    | 0    | 0    | 4    | 3    | 7    | 7    |
| K07651 two-component system, OmpR family, sensor histidine kinase ResE [EC:2.7.13.3]                             | 6     | 9     | 12    | 11    | 2    | 3    | 3    | 1    | 12   | 20   | 22   | 25   |
| K07652 two-component system, OmpR family, sensor histidine kinase VicK [EC:2.7.13.3]                             | 185   | 167   | 173   | 175   | 140  | 136  | 140  | 159  | 242  | 259  | 228  | 243  |
| K07653 two-component system, OmpR family, sensor histidine kinase MprB [EC:2.7.13.3]                             | 0     | 3     | 4     | 2     | 0    | 0    | 2    | 0    | 1    | 6    | 2    | 2    |
| K07654 two-component system, OmpR family, sensor histidine kinase MtrB [EC:2.7.13.3]                             | 8     | 4     | 12    | 8     | 3    | 3    | 1    | 3    | 17   | 17   | 14   | 24   |
| K07656 two-component system, OmpR family, sensor histidine kinase TrcS [EC:2.7.13.3]                             | 0     | 0     | 0     | 0     | 0    | 0    | 0    | 0    | 1    | 0    | 0    | 0    |
| K07657 two-component system, OmpR family, phosphate regulon response regulator PhoB                              | 1050  | 1044  | 1057  | 1050  | 749  | 682  | 685  | 679  | 881  | 839  | 759  | 866  |
| K07658 two-component system, OmpR family, alkaline phosphatase synthesis response regulator PhoP                 | 525   | 429   | 484   | 514   | 107  | 192  | 157  | 150  | 514  | 673  | 648  | 616  |
| K07659 two-component system, OmpR family, phosphate regulon response regulator OmpR                              | 1247  | 1320  | 1190  | 1257  | 863  | 874  | 850  | 773  | 1042 | 1025 | 1054 | 1046 |
| K07660 two-component system, OmpR family, response regulator PhoA                                                | 1474  | 1545  | 1396  | 1494  | 796  | 825  | 696  | 771  | 1257 | 1375 | 1361 | 1422 |
| K07661 two-component system, OmpR family, response regulator RstA                                                | 1445  | 1473  | 1382  | 1481  | 858  | 836  | 803  | 831  | 881  | 869  | 811  | 845  |
| K07662 two-component system, OmpR family, response regulator CpxH                                                | 449   | 411   | 444   | 421   | 316  | 340  | 369  | 339  | 665  | 678  | 653  | 617  |
| K07663 two-component system, OmpR family, catabolic regulation response regulator CreB                           | 1541  | 1494  | 1464  | 1485  | 916  | 910  | 918  | 849  | 930  | 864  | 891  | 913  |
| K07664 two-component system, OmpR family, response regulator BaeR                                                | 407   | 415   | 365   | 404   | 262  | 255  | 241  | 258  | 584  | 601  | 561  | 552  |
| K07665 two-component system, OmpR family, copper resistance phosphate regulon response regulator CusR            | 5456  | 5225  | 5081  | 5339  | 3454 | 3499 | 3212 | 3447 | 1971 | 1897 | 1874 | 1842 |
| K07666 two-component system, OmpR family, response regulator QseB                                                | 1077  | 1127  | 1131  | 1095  | 667  | 696  | 725  | 683  | 913  | 911  | 931  | 918  |
| K07667 two-component system, OmpR family, KDP operon response regulator KdpE                                     | 2347  | 2055  | 2213  | 2222  | 899  | 922  | 879  | 930  | 2092 | 2061 | 2058 | 2121 |
| K07668 two-component system, OmpR family, response regulator VicR                                                | 101   | 129   | 136   | 124   | 60   | 74   | 76   | 78   | 140  | 148  | 148  | 157  |
| K07669 two-component system, OmpR family, response regulator MprA                                                | 13    | 8     | 10    | 13    | 9    | 21   | 7    | 16   | 12   | 12   | 19   | 11   |
| K07670 two-component system, OmpR family, response regulator MtrA                                                | 9     | 9     | 11    | 2     | 5    | 5    | 1    | 7    | 12   | 10   | 10   | 17   |
| K07671 two-component system, OmpR family, response regulator PrrA                                                | 0     | 0     | 0     | 2     | 0    | 1    | 2    | 0    | 1    | 0    | 2    | 3    |
| K07672 two-component system, OmpR family, response regulator TrcR                                                | 0     | 0     | 0     | 3     | 0    | 0    | 0    | 0    | 3    | 3    | 4    | 1    |
| K07673 two-component system, NarL family, nitrate/nitrite sensor histidine kinase NarX [EC:2.7.13.3]             | 2305  | 2392  | 2075  | 2283  | 1526 | 1579 | 1404 | 1505 | 1972 | 1898 | 1819 | 1876 |
| K07674 two-component system, NarL family, nitrate/nitrite sensor histidine kinase NarQ [EC:2.7.13.3]             | 344   | 346   | 371   | 385   | 557  | 592  | 548  | 473  | 125  | 104  | 95   | 109  |
| K07675 two-component system, NarL family, sensor histidine kinase UhpB [EC:2.7.13.3]                             | 592   | 621   | 554   | 625   | 209  | 172  | 174  | 163  | 1355 | 1285 | 1279 | 1314 |
| K07676 two-component system, NarL family, sensor histidine kinase RcsD [EC:2.7.13.3]                             | 1423  | 1589  | 1433  | 1521  | 1018 | 1012 | 1031 | 1050 | 1930 | 2055 | 1973 | 2023 |
| K07677 two-component system, NarL family, capsular synthesis sensor histidine kinase RcsC [EC:2.7.13.3]          | 1648  | 1697  | 1558  | 1743  | 1083 | 1242 | 1206 | 1052 | 2299 | 2465 | 2226 | 2482 |
| K07678 two-component system, NarL family, sensor histidine kinase Bark [EC:2.7.13.3]                             | 528   | 5278  | 4876  | 5261  | 3053 | 3115 | 3206 | 3275 | 3477 | 3402 | 3428 | 3438 |
| K07679 two-component system, NarL family, sensor histidine kinase EvgS [EC:2.7.13.3]                             | 10903 | 10843 | 10873 | 10764 | 5697 | 6016 | 5516 | 5433 | 5573 | 5689 | 5671 | 5932 |
| K07680 two-component system, NarL family, sensor histidine kinase Comp [EC:2.7.13.3]                             | 0     | 9     | 2     | 1     | 0    | 0    | 0    | 0    | 0    | 0    | 0    | 0    |
| K07681 two-component system, NarL family, vancomycin resistance sensor histidine kinase VraS [EC:2.7.13.3]       | 0     | 0     | 0     | 0     | 0    | 0    | 0    | 0    | 1    | 0    | 0    | 0    |
| K07682 two-component system, NarL family, sensor histidine kinase NreB [EC:2.7.13.3]                             | 0     | 0     | 0     | 0     | 0    | 1    | 2    | 1    | 0    | 3    | 3    | 0    |
| K07684 two-component system, NarL family, nitrate/nitrite response regulator NarL                                | 1199  | 1132  | 1206  | 1197  | 736  | 774  | 790  | 916  | 828  | 809  | 764  | 753  |
| K07685 two-component system, NarL family, nitrate/nitrite response regulator NarP                                | 2     | 3     | 5     | 1     | 10   | 9    | 6    | 42   | 72   | 57   | 36   |      |
| K07686 two-component system, NarL family, uhpT operon response regulator UhpA                                    | 867   | 871   | 764   | 872   | 438  | 370  | 411  | 409  | 568  | 653  | 645  | 631  |
| K07687 two-component system, NarL family, capsular synthesis response regulator RcsB                             | 2525  | 2576  | 2617  | 2549  | 1445 | 1567 | 1465 | 1414 | 1278 | 1246 | 1185 | 1147 |
| K07688 two-component system, NarL family, response regulator, fimbrial Z protein, FimZ                           | 124   | 133   | 128   | 145   | 195  | 196  | 224  | 204  | 0    | 1    | 0    | 1    |
| K07689 two-component system, NarL family, invasion response regulator UuvY                                       | 465   | 476   | 443   | 500   | 317  | 374  | 297  | 333  | 522  | 621  | 534  | 651  |
| K07690 two-component system, NarL family, response regulator EvgA                                                | 2519  | 2453  | 2279  | 2346  | 1342 | 1424 | 1295 | 1313 | 1175 | 1105 | 1067 | 1108 |
| K07691 two-component system, NarL family, competent response regulator ComA                                      | 1     | 0     | 0     | 3     | 0    | 0    | 0    | 0    | 0    | 0    | 0    | 0    |
| K07692 two-component system, NarL family, response regulator DegU                                                | 1     | 0     | 0     | 0     | 0    | 0    | 0    | 0    | 0    | 0    | 0    | 0    |
| K07693 two-component system, NarL family, response regulator DesR                                                | 6     | 2     | 9     | 4     | 0    | 2    | 2    | 11   | 7    | 8    | 4    |      |
| K07694 two-component system, NarL family, vancomycin resistance associated response regulator VraR               | 3     | 2     | 0     | 5     | 2    | 3    | 1    | 3    | 0    | 0    | 0    | 0    |
| K07696 two-component system, NarL family, response regulator NreC                                                | 3     | 3     | 6     | 2     | 6    | 3    | 5    | 3    | 7    | 10   | 4    | 2    |
| K07698 two-component system, sporulation sensor kinase C [EC:2.7.13.3]                                           | 0     | 1     | 0     | 1     | 0    | 0    | 0    | 0    | 5    | 0    | 1    | 1    |
| K07699 two-component system, response regulator, stage 0 sporulation protein A                                   | 490   | 538   | 539   | 552   | 184  | 194  | 187  | 211  | 444  | 541  | 430  | 458  |
| K07700 two-component system, CitB family, cit operon sensor histidine kinase CitA [EC:2.7.13.3]                  | 1632  | 1609  | 1461  | 1707  | 854  | 936  | 922  | 829  | 2755 | 3000 | 2601 | 2803 |
| K07701 two-component system, CitB family, sensor histidine kinase DcuS [EC:2.7.13.3]                             | 907   | 960   | 859   | 913   | 628  | 690  | 628  | 630  | 1296 | 1417 | 1205 | 1347 |
| K07702 two-component system, CitB family, response regulator CitB                                                | 706   | 747   | 752   | 689   | 341  | 417  | 411  | 403  | 1129 | 1232 | 1214 | 1217 |
| K07703 two-component system, CitB family, response regulator DcuR                                                | 392   | 364   | 384   | 393   | 232  | 273  | 268  | 312  | 518  | 571  | 520  | 587  |
| K07704 two-component system, LytR family, sensor histidine kinase LytS [EC:2.7.13.3]                             | 279   | 287   | 287   | 276   | 86   | 127  | 127  | 95   | 334  | 409  | 359  | 379  |
| K07705 two-component system, LytR family, response regulator LytT                                                | 96    | 129   | 113   | 104   | 40   | 48   | 47   | 43   | 94   | 115  | 87   | 99   |
| K07706 two-component system, LytR family, sensor histidine kinase AgrC [EC:2.7.13.3]                             | 383   | 381   | 359   | 419   | 92   | 98   | 64   | 79   | 556  | 549  | 563  | 536  |
| K07707 two-component system, LytR family, response regulator AgrA                                                | 145   | 159   | 176   | 162   | 61   | 57   | 70   | 44   | 200  | 243  | 223  | 218  |
| K07708 two-component system, NtrC family, nitrogen regulation sensor histidine kinase GlnL [EC:2.7.13.3]         | 2067  | 1994  | 1938  | 2199  | 1347 | 1341 | 1230 | 1308 | 1372 | 1419 | 1375 | 1527 |
| K07709 two-component system, NtrC family, sensor histidine kinase HydH [EC:2.7.13.3]                             | 859   | 903   | 848   | 904   | 594  | 723  | 623  | 639  | 1271 | 1179 | 1151 | 1246 |
| K07710 two-component system, NtrC family, sensor histidine kinase AtoS [EC:2.7.13.3]                             | 5     | 5     | 12    | 4     | 19   | 27   | 45   | 16   | 107  | 119  | 102  | 116  |
| K07711 two-component system, NtrC family, sensor histidine kinase GlnK [EC:2.7.13.3]                             | 846   | 793   | 754   | 867   | 507  | 600  | 485  | 496  | 1214 | 1223 | 1115 | 1248 |
| K07712 two-component system, NtrC family, nitrogen regulation response regulator GlnG                            | 3562  | 3564  | 3384  | 3535  | 2330 | 2121 | 2127 | 2194 | 2080 | 2148 | 2170 | 2196 |
| K07713 two-component system, NtrC family, response regulator HydG                                                | 3724  | 3810  | 4020  | 3871  | 9125 | 9085 | 9121 | 9160 | 7183 | 6957 | 7422 | 6929 |
| K07714 two-component system, NtrC family, response regulator AtoC                                                | 37    | 24    | 47    | 32    | 42   | 28   | 56   | 32   | 103  | 103  | 98   | 92   |
| K07715 two-component system, NtrC family, response regulator GlnR                                                | 798   | 753   | 745   | 771   | 538  | 629  | 619  | 570  | 1135 | 1146 | 1099 | 1201 |
| K07716 two-component system, cell cycle sensor histidine kinase PleC [EC:2.7.13.3]                               | 4     | 2     | 3     | 3     | 6    | 6    | 6    | 6    | 6    | 9    | 4    | 7    |
| K07717 two-component system, sensor histidine kinase YcbA [EC:2.7.13.3]                                          | 15    | 12    | 12    | 25    | 5    | 8    | 13   | 7    | 10   | 13   | 3    | 7    |

|                                                                                                                        |      |      |      |      |      |      |      |      |      |      |      |      |
|------------------------------------------------------------------------------------------------------------------------|------|------|------|------|------|------|------|------|------|------|------|------|
| K07795 putative tricarboxylic transport membrane protein                                                               | 1498 | 1504 | 1424 | 1436 | 824  | 762  | 802  | 808  | 436  | 415  | 431  | 463  |
| K07796 outer membrane protein, Cu(I)/Ag(I) efflux system                                                               | 1435 | 1442 | 1375 | 1519 | 1455 | 1506 | 1411 | 1363 | 1331 | 1448 | 1352 | 1512 |
| K07797 multidrug resistance protein K                                                                                  | 7    | 1    | 0    | 7    | 10   | 14   | 10   | 10   | 68   | 57   | 69   | 58   |
| K07798 membrane fusion protein, Cu(I)/Ag(I) efflux system                                                              | 3645 | 3550 | 3730 | 3697 | 2795 | 2840 | 2895 | 2727 | 1638 | 1839 | 1722 | 1895 |
| K07799 membrane fusion protein, multidrug efflux system                                                                | 2191 | 2156 | 1998 | 2157 | 1314 | 1365 | 1339 | 1338 | 1409 | 1333 | 1279 | 1409 |
| K07800 AgrD protein                                                                                                    | 7    | 6    | 12   | 9    | 4    | 3    | 3    | 2    | 4    | 9    | 10   | 5    |
| K07803 zinc resistance-associated protein                                                                              | 263  | 314  | 301  | 257  | 185  | 225  | 202  | 181  | 434  | 404  | 374  | 421  |
| K07810 Cu(I)/Ag(I) efflux system periplasmic protein CusF                                                              | 301  | 326  | 317  | 339  | 336  | 332  | 283  | 295  | 300  | 365  | 314  | 334  |
| K07813 accessory gene regulator B                                                                                      | 200  | 213  | 218  | 209  | 98   | 90   | 97   | 76   | 166  | 192  | 177  | 214  |
| K08062 two-component system, LytR family, sensor histidine kinase AlgZ [EC:2.7.13.3]                                   | 1786 | 1765 | 1642 | 1757 | 962  | 919  | 925  | 1035 | 582  | 559  | 574  | 565  |
| K08063 two-component system, LytR family, response regulator AlgR                                                      | 1333 | 1430 | 1347 | 1260 | 699  | 665  | 668  | 793  | 400  | 425  | 389  | 417  |
| K08348 formate dehydrogenase-N, alpha subunit [EC:1.17.5.3]                                                            | 2136 | 2146 | 2030 | 2134 | 1839 | 1922 | 1813 | 1865 | 2255 | 2343 | 2294 | 2364 |
| K08349 formate dehydrogenase-N, beta subunit                                                                           | 674  | 709  | 667  | 712  | 719  | 685  | 575  | 649  | 746  | 747  | 807  | 778  |
| K08350 formate dehydrogenase-N, gamma subunit                                                                          | 436  | 435  | 451  | 473  | 363  | 415  | 423  | 420  | 447  | 494  | 472  | 534  |
| K08372 putative serine protease PepD [EC:3.4.21.-]                                                                     | 12   | 7    | 13   | 13   | 5    | 13   | 5    | 16   | 16   | 24   | 26   | 29   |
| K08475 two-component system, NtrC family, phosphoglycerate transport system sensor histidine kinase PgtB [EC:2.7.13.3] | 698  | 667  | 692  | 736  | 168  | 170  | 177  | 155  | 1364 | 1409 | 1362 | 1498 |
| K08476 two-component system, NtrC family, phosphoglycerate transport system response regulator PgtA                    | 479  | 447  | 433  | 437  | 107  | 129  | 129  | 133  | 975  | 900  | 912  | 1006 |
| K08478 phosphoglycerate transport regulatory protein PgtC                                                              | 381  | 466  | 431  | 430  | 132  | 108  | 146  | 112  | 883  | 874  | 992  | 951  |
| K08641 zinc D-Ala-D-Ala dipeptidase [EC:3.4.13.22]                                                                     | 1905 | 1835 | 1716 | 1711 | 2501 | 2550 | 2426 | 2551 | 1714 | 1596 | 1754 | 1630 |
| K08738 cytochrome c                                                                                                    | 536  | 445  | 470  | 493  | 285  | 267  | 263  | 266  | 206  | 158  | 146  | 142  |
| K09475 outer membrane pore protein C                                                                                   | 629  | 577  | 622  | 634  | 429  | 474  | 458  | 385  | 856  | 938  | 853  | 866  |
| K09476 outer membrane pore protein F                                                                                   | 794  | 832  | 785  | 825  | 668  | 798  | 790  | 655  | 871  | 921  | 848  | 861  |
| K09477 citrate:succinate antiporter                                                                                    | 16   | 21   | 18   | 18   | 5    | 16   | 10   | 23   | 64   | 73   | 69   | 82   |
| K10125 two-component system, NtrC family, C4-dicarboxylate transport sensor histidine kinase DctB [EC:2.7.13.3]        | 2971 | 2775 | 2769 | 2925 | 1530 | 1610 | 1598 | 1635 | 1117 | 1038 | 973  | 1122 |
| K10126 two-component system, NtrC family, C4-dicarboxylate transport response regulator DctD                           | 4408 | 4410 | 4166 | 4315 | 2438 | 2340 | 2291 | 2415 | 1509 | 1399 | 1404 | 1417 |
| K10697 two-component system, OmpR family, response regulator RpaA                                                      | 3    | 2    | 1    | 1    | 0    | 0    | 0    | 0    | 2    | 2    | 2    | 4    |
| K10715 two-component system, sensor histidine kinase RpfC [EC:2.7.13.3]                                                | 2    | 0    | 1    | 1    | 0    | 1    | 1    | 0    | 1    | 0    | 0    | 1    |
| K10851 nitrogen regulatory protein A                                                                                   | 0    | 0    | 0    | 0    | 0    | 1    | 0    | 2    | 0    | 0    | 0    | 0    |
| K10909 two-component system, autoinducer 2 sensor kinase/phosphatase LuxQ [EC:2.7.13.3.1.3.-]                          | 0    | 0    | 0    | 0    | 3    | 2    | 3    | 2    | 1    | 0    | 3    | 1    |
| K10914 CRP/FNR family transcriptional regulator, cyclic AMP receptor protein                                           | 2190 | 2285 | 2142 | 2133 | 1190 | 1085 | 1039 | 1169 | 1181 | 1318 | 1193 | 1221 |
| K10941 sigma-54 dependent transcriptional regulator, flagellar regulatory protein                                      | 1956 | 1955 | 1942 | 1910 | 1072 | 1122 | 987  | 1125 | 619  | 613  | 600  | 573  |
| K10942 two-component system, sensor histidine kinase FirB [EC:2.7.13.3]                                                | 1791 | 1805 | 1776 | 1728 | 924  | 900  | 741  | 849  | 518  | 512  | 532  | 533  |
| K10943 two-component system, response regulator Firc                                                                   | 2189 | 2121 | 2109 | 2065 | 1103 | 1097 | 1031 | 1139 | 757  | 636  | 676  | 663  |
| K11103 aerobic C4-dicarboxylate transport protein                                                                      | 3967 | 4015 | 4054 | 3946 | 2380 | 2399 | 2250 | 2587 | 2224 | 2270 | 2113 | 2229 |
| K11230 mitogen-activated protein kinase kinase kinase [EC:2.7.11.25]                                                   | 0    | 0    | 0    | 0    | 0    | 0    | 0    | 0    | 0    | 0    | 0    | 1    |
| K11231 osmolarity two-component system, sensor histidine kinase SLN1 [EC:2.7.13.3]                                     | 1    | 0    | 0    | 0    | 1    | 0    | 0    | 0    | 0    | 0    | 0    | 0    |
| K11329 two-component system, OmpR family, response regulator RpaB                                                      | 1    | 2    | 0    | 0    | 0    | 2    | 1    | 0    | 4    | 2    | 0    | 1    |
| K11354 two-component system, chemotaxis family, sensor kinase CphI [EC:2.7.13.3]                                       | 0    | 0    | 0    | 1    | 0    | 0    | 0    | 0    | 3    | 0    | 0    | 0    |
| K11356 two-component system, sensor histidine kinase and response regulator [EC:2.7.13.3]                              | 1    | 1    | 2    | 0    | 1    | 0    | 1    | 1    | 1    | 1    | 1    | 1    |
| K11357 two-component system, cell cycle sensor histidine kinase DivI [EC:2.7.13.3]                                     | 2    | 3    | 3    | 3    | 2    | 2    | 4    | 1    | 7    | 3    | 5    | 3    |
| K11382 MFS transporter, OPA family, phosphoglycerate transporter protein                                               | 417  | 459  | 491  | 443  | 84   | 142  | 115  | 108  | 1030 | 1040 | 957  | 974  |
| K11383 two-component system, NtrC family, sensor histidine kinase KinB [EC:2.7.13.3]                                   | 1128 | 1866 | 1847 | 1951 | 1121 | 1099 | 1035 | 1035 | 601  | 570  | 631  | 649  |
| K11384 two-component system, NtrC family, response regulator AlgB                                                      | 2262 | 2308 | 2330 | 2359 | 1280 | 1221 | 1265 | 1418 | 696  | 749  | 656  | 731  |
| K11443 two-component system, cell cycle response regulator Dwk                                                         | 0    | 2    | 0    | 0    | 0    | 0    | 0    | 0    | 0    | 0    | 0    | 0    |
| K11444 two-component system, chemotaxis family, response regulator WspR [EC:2.7.7.65]                                  | 121  | 119  | 118  | 109  | 72   | 81   | 194  | 235  | 38   | 44   | 44   | 42   |
| K11520 two-component system, OmpR family, manganese sensing sensor histidine kinase [EC:2.7.13.3]                      | 0    | 1    | 0    | 1    | 0    | 0    | 1    | 0    | 0    | 0    | 0    | 1    |
| K11521 two-component system, OmpR family, manganese sensing response regulator                                         | 0    | 1    | 2    | 3    | 1    | 1    | 1    | 0    | 4    | 0    | 3    | 1    |
| K11525 methyl-accepting chemotaxis protein PixI                                                                        | 0    | 1    | 1    | 0    | 0    | 0    | 0    | 0    | 0    | 0    | 0    | 0    |
| K11614 two-component system, CitB family, sensor histidine kinase MalK [EC:2.7.13.3]                                   | 63   | 58   | 75   | 58   | 22   | 20   | 27   | 22   | 111  | 151  | 132  | 125  |
| K11615 two-component system, CitB family, response regulator MalR                                                      | 54   | 50   | 47   | 62   | 14   | 20   | 10   | 21   | 75   | 86   | 102  | 59   |
| K11616 malate:Na+ symporter                                                                                            | 68   | 55   | 69   | 68   | 63   | 95   | 85   | 86   | 100  | 97   | 85   | 102  |
| K11617 two-component system, NarL family, sensor histidine kinase LiaS [EC:2.7.13.3]                                   | 93   | 66   | 86   | 73   | 24   | 16   | 13   | 24   | 66   | 96   | 80   | 100  |
| K11618 two-component system, NarL family, response regulator LiaR                                                      | 44   | 37   | 43   | 39   | 8    | 9    | 17   | 30   | 55   | 41   | 60   |      |
| K11624 two-component system, NarL family, response regulator YdfI                                                      | 6    | 5    | 3    | 3    | 3    | 0    | 0    | 0    | 6    | 10   | 9    | 13   |
| K11626 putative sodium/glutamate symporter                                                                             | 1    | 1    | 2    | 1    | 4    | 5    | 2    | 3    | 3    | 3    | 1    | 2    |
| K11629 two-component system, OmpR family, bacitracin resistance sensor histidine kinase BceS [EC:2.7.13.3]             | 2    | 2    | 0    | 1    | 0    | 0    | 0    | 0    | 0    | 0    | 0    | 0    |
| K11630 two-component system, OmpR family, bacitracin resistance response regulator BceR                                | 0    | 0    | 4    | 1    | 2    | 3    | 9    | 2    | 2    | 3    | 1    |      |
| K11635 putative ABC transport system ATP-binding protein                                                               | 42   | 57   | 41   | 33   | 3    | 21   | 9    | 3    | 35   | 50   | 36   | 49   |
| K11636 putative ABC transport system permease protein                                                                  | 91   | 94   | 79   | 110  | 8    | 11   | 11   | 25   | 104  | 99   | 64   | 83   |
| K11637 two-component system, CitB family, sensor histidine kinase CitS [EC:2.7.13.3]                                   | 2    | 0    | 2    | 0    | 1    | 0    | 1    | 0    | 1    | 0    | 1    | 2    |
| K11688 C4-dicarboxylate-binding protein DctP                                                                           | 5009 | 5004 | 4905 | 4852 | 2796 | 2910 | 2662 | 2851 | 1473 | 1631 | 1505 | 1573 |
| K11689 C4-dicarboxylate transporter, DctA subunit                                                                      | 2012 | 1980 | 1926 | 1987 | 1166 | 1106 | 988  | 1096 | 695  | 685  | 733  | 713  |
| K11690 C4-dicarboxylate transporter, DctM subunit                                                                      | 3764 | 3766 | 3629 | 3689 | 2067 | 1970 | 1887 | 2018 | 1633 | 1759 | 1662 | 1698 |
| K11691 two-component system, CitB family, sensor histidine kinase DctS [EC:2.7.13.3]                                   | 0    | 2    | 2    | 3    | 0    | 0    | 0    | 1    | 0    | 2    | 0    | 1    |
| K11692 two-component system, CitB family, response regulator DctR                                                      | 8    | 4    | 10   | 5    | 40   | 33   | 37   | 38   | 13   | 17   | 5    | 12   |
| K11711 two-component system, LuxR family, sensor histidine kinase DctS [EC:2.7.13.3]                                   | 4    | 6    | 2    | 6    | 10   | 5    | 8    | 14   | 10   | 4    | 6    | 10   |
| K11712 two-component system, LuxR family, response regulator DctR                                                      | 4    | 3    | 7    | 3    | 6    | 5    | 11   | 2    | 5    | 8    | 7    | 6    |
| K12531 ATP-binding cassette, subfamily B, bacterial RtxE                                                               | 6    | 9    | 10   | 7    | 4    | 4    | 7    | 5    | 5    | 3    | 1    | 1    |
| K13040 two-component system, LuxR family, sensor histidine kinase TrtS [EC:2.7.13.3]                                   | 190  | 202  | 202  | 195  | 316  | 374  | 358  | 369  | 353  | 320  | 304  | 278  |
| K13041 two-component system, LuxR family, response regulator TrtR                                                      | 12   | 17   | 8    | 12   | 16   | 18   | 21   | 25   | 30   | 20   | 17   | 17   |
| K13486 chemotaxis protein methyltransferase WspC                                                                       | 1198 | 1782 | 1700 | 1699 | 1024 | 957  | 1083 | 1068 | 588  | 608  | 558  | 563  |
| K13487 methyl-accepting chemotaxis protein WspA                                                                        | 2047 | 2076 | 2052 | 2078 | 1121 | 1108 | 879  | 948  | 673  | 615  | 609  | 665  |
| K13488 chemotaxis-related protein WspB                                                                                 | 774  | 731  | 755  | 784  | 384  | 377  | 337  | 417  | 264  | 212  | 200  | 230  |
| K13489 chemotaxis-related protein WspD                                                                                 | 152  | 135  | 129  | 152  | 80   | 81   | 64   | 101  | 52   | 44   | 45   | 44   |
| K13490 two-component system, chemotaxis family, sensor histidine kinase and response regulator WspE                    | 3201 | 3067 | 2965 | 3064 | 1621 | 1576 | 1554 | 1858 | 886  | 848  | 934  | 911  |
| K13491 two-component system, chemotaxis family, response regulator WspF [EC:3.1.1.61]                                  | 1658 | 1646 | 1582 | 1636 | 929  | 860  | 850  | 955  | 553  | 481  | 448  | 514  |
| K13532 two-component system, sporulation sensor kinase D [EC:2.7.13.3]                                                 | 0    | 0    | 0    | 0    | 0    | 0    | 1    | 0    | 0    | 0    | 0    | 0    |
| K13533 two-component system, sporulation sensor kinase E [EC:2.7.13.3]                                                 | 1    | 0    | 0    | 3    | 0    | 0    | 0    | 0    | 0    | 0    | 0    | 0    |
| K13584 two-component system, cell cycle response regulator CtrA                                                        | 0    | 0    | 3    | 1    | 0    | 4    | 0    | 1    | 4    | 2    | 0    | 1    |
| K13587 two-component system, cell cycle sensor histidine kinase and response regulator CckA [EC:2.7.13.3]              | 2    | 4    | 0    | 1    | 0    | 0    | 0    | 2    | 6    | 8    | 3    | 3    |
| K13588 histidine phosphotransferase ChpT                                                                               | 0    | 0    | 0    | 1    | 0    | 0    | 0    | 0    | 2    | 0    | 1    | 1    |
| K13589 two-component system, cell cycle response regulator CpdR                                                        | 0    | 0    | 0    | 1    | 0    | 0    | 1    | 0    | 0    | 0    | 0    | 1    |
| K13598 two-component system, NtrC family, nitrogen regulation sensor histidine kinase NtrY [EC:2.7.13.3]               | 13   | 12   | 5    | 7    | 5    | 2    | 3    | 4    | 7    | 4    | 3    | 7    |
| K13599 two-component system, NtrC family, nitrogen regulation response regulator NtrX                                  | 25   | 12   | 17   | 10   | 8    | 9    | 13   | 11   | 5    | 10   | 8    | 10   |
| K13815 two-component system, response regulator RpfG                                                                   | 0    | 0    | 0    | 1    | 0    | 0    | 0    | 0    | 0    | 0    | 0    | 0    |
| K13816 DSF synthase                                                                                                    | 175  | 160  | 180  | 169  | 243  | 236  | 221  | 220  | 0    | 2    | 0    | 0    |
| K13924 two-component system, chemotaxis family, CheB/CheR fusion protein [EC:2.1.1.80 3.1.1.61]                        | 112  | 89   | 97   | 76   | 14   | 6    | 13   | 9    | 84   | 69   | 61   | 63   |
| K13927 holo-ACP synthase / triphosphoribosyl-dephospho-CoA synthase [EC:2.7.7.61 2.4.2.52]                             | 126  | 112  | 130  | 112  | 27   | 25   | 13   | 7    | 144  | 153  | 136  | 152  |
| K14205 phosphatidylglycerol lysyltransferase [EC:3.2.3.2]                                                              | 4315 | 4186 | 4250 | 4077 | 2349 | 2292 | 2040 | 2243 | 1571 | 1581 | 1494 | 1675 |
| K14978 two-component system, LuxR family, secretion system sensor histidine kinase SsrA                                | 1    | 0    | 0    | 1    | 0    | 0    | 0    | 2    | 0    | 0    | 0    | 0    |
| K14979 two-component system, LuxR family, secretion system response regulator SsrB                                     | 1    | 0    | 0    | 0    | 0    | 1    | 0    | 0    | 0    | 0    | 0    | 0    |
| K14980 two-component system, OmpR family, sensor histidine kinase ChvG [EC:2.7.13.3]                                   | 3    | 5    | 3    | 3    | 1    | 0    | 0    | 3    | 6    | 3    | 1    | 8    |
| K14981 two-component system, OmpR family, response regulator ChvI                                                      | 3    | 1    | 1    | 1    | 0    | 0    | 1    | 2    | 1    | 0    | 2    | 0    |
| K14982 two-component system, OmpR family, sensor histidine kinase CiaH [EC:2.7.13.3]                                   | 8    | 14   | 10   | 9    | 18   | 25   | 13   | 16   | 37   | 20   | 24   | 27   |
| K14983 two-component system, OmpR family, response regulator CiaR                                                      | 8    | 5    | 7    | 13   | 8    | 4    | 17   | 13   | 16   | 30   | 13   | 36   |
| K14986 two-component system, LuxR family, sensor kinase FxI [EC:2.7.13.3]                                              | 3    | 1    | 1    | 1    | 1    | 0    | 0    | 0    | 3    | 1    | 0    | 3    |
| K14987 two-component system, LuxR family, response regulator FxI                                                       | 13   | 14   | 11   | 13   | 27   | 16   | 17   | 23   | 30   | 23   | 17   | 19   |
| K14988 two-component system, NarL family, secretion system sensor histidine kinase Salk                                | 18   | 29   | 12   | 17   | 37   | 24   | 20   | 14   | 40   | 36   | 44   | 36   |
| K14989 two-component system, NarL family, secretion system response regulator SalR                                     | 21   | 9    | 11   | 10   | 5    | 8    | 17   | 9    | 26   | 19   | 12   | 46   |
| K15011 two-component system, sensor histidine kinase RegB [EC:2.7.13.3]                                                | 816  | 794  | 777  | 782  | 456  | 412  | 406  | 471  | 262  | 285  | 259  | 297  |
| K15012 two-component system, response regulator RegA                                                                   | 805  | 777  | 754  | 782  | 435  | 406  | 358  | 398  | 245  | 226  | 209  | 210  |
| K15739 D-alanine--(R)-lactate ligase [EC:6.1.2.1]                                                                      | 0    | 0    | 0    | 0    | 0    | 0    | 2    | 0    | 0    | 0    | 0    | 1    |
| K15861 CRP/FNR family transcriptional regulator, nitrogen fixation regulation protein                                  | 0    | 2    | 1    | 0    | 0    | 0    | 0    | 0    | 0    | 0    | 0    | 0    |
| K16692 tyrosine-protein kinase Etk/Wzc [EC:2.7.10.-]                                                                   | 572  | 579  | 646  | 669  | 755  | 816  | 679  | 723  | 537  | 611  | 591  | 613  |
| K17060 two-component system, sensor histidine kinase AauS [EC:2.7.13.3]                                                | 430  | 403  | 392  | 431  | 228  | 235  | 1    |      |      |      |      |      |

|                                                                                                                    |        |        |        |        |        |        |        |        |        |        |        |        |
|--------------------------------------------------------------------------------------------------------------------|--------|--------|--------|--------|--------|--------|--------|--------|--------|--------|--------|--------|
| K18350 two-component system, OmpR family, sensor histidine kinase VanS [EC:2.7.13.3]                               | 214    | 207    | 192    | 207    | 95     | 102    | 76     | 76     | 319    | 339    | 331    | 351    |
| K18351 two-component system, OmpR family, sensor histidine kinase VanS [EC:2.7.13.3]                               | 0      | 0      | 1      | 0      | 0      | 0      | 0      | 0      | 1      | 2      | 0      | 1      |
| K18856 D-alanine--D-serine ligase [EC:6.3.2.35]                                                                    | 13     | 12     | 19     | 21     | 25     | 12     | 14     | 15     | 9      | 11     | 15     | 12     |
| K18940 two-component system, OmpR family, sensor histidine kinase ArlS [EC:2.7.13.3]                               | 0      | 1      | 0      | 0      | 1      | 0      | 1      | 0      | 2      | 2      | 2      | 2      |
| K18941 two-component system, OmpR family, response regulator ArlR                                                  | 2      | 0      | 2      | 0      | 0      | 0      | 0      | 0      | 0      | 0      | 0      | 0      |
| K18986 two-component system, OmpR family, sensor kinase Ihk [EC:2.7.13.3]                                          | 65     | 69     | 62     | 55     | 58     | 42     | 48     | 51     | 92     | 114    | 87     | 119    |
| K18987 two-component system, OmpR family, response regulator Irr                                                   | 0      | 0      | 1      | 0      | 1      | 2      | 0      | 0      | 1      | 2      | 0      | 0      |
| K19078 two-component system, OmpR family, response regulator protein GraR                                          | 0      | 0      | 0      | 0      | 0      | 0      | 0      | 0      | 0      | 0      | 1      | 1      |
| K19082 two-component system, OmpR family, response regulator protein BraR/BceR                                     | 2      | 0      | 0      | 0      | 0      | 0      | 0      | 0      | 2      | 1      | 0      | 1      |
| K19609 two-component system, OmpR family, sensor histidine kinase PfsF [EC:2.7.13.3]                               | 4136   | 3792   | 3783   | 3753   | 2095   | 2084   | 2050   | 2403   | 1353   | 1106   | 1172   | 1205   |
| K19610 two-component system, OmpR family, response regulator PfsR                                                  | 2198   | 2249   | 2038   | 2127   | 1194   | 1092   | 1100   | 1155   | 746    | 675    | 574    | 675    |
| K19611 ferric enterobactin receptor                                                                                | 7723   | 7692   | 7242   | 7732   | 3954   | 3974   | 3781   | 3943   | 6619   | 6802   | 6502   | 6609   |
| K19641 two-component system, NtrC family, response regulator HupR/HoxA                                             | 1      | 0      | 0      | 0      | 0      | 0      | 0      | 0      | 2      | 1      | 1      | 2      |
| K19661 two-component system, NtrC family, sensor histidine kinase HupT/HoxJ [EC:2.7.13.3]                          | 3      | 0      | 0      | 1      | 0      | 0      | 0      | 0      | 0      | 0      | 0      | 0      |
| K19691 osmolarity two-component system, sensor histidine kinase NrkI [EC:2.7.13.3]                                 | 1      | 0      | 0      | 0      | 1      | 0      | 0      | 1      | 0      | 0      | 0      | 0      |
| K20263 two-component system, NarI family, sensor histidine kinase FusK [EC:2.7.13.3]                               | 360    | 337    | 296    | 332    | 434    | 508    | 500    | 537    | 0      | 0      | 4      | 0      |
| K20264 two-component system, NarI family, response regulator FusR                                                  | 134    | 150    | 163    | 123    | 167    | 232    | 208    | 186    | 1      | 0      | 0      | 1      |
| K20340 two-component system, LytR family, response regulator AgrA2                                                 | 0      | 0      | 0      | 0      | 0      | 0      | 0      | 0      | 1      | 1      | 0      | 1      |
| K20483 lantibiotic biosynthesis protein                                                                            | 0      | 2      | 2      | 0      | 0      | 4      | 5      | 0      | 0      | 2      | 3      | 3      |
| K20484 lantibiotic biosynthesis protein                                                                            | 0      | 2      | 0      | 1      | 2      | 0      | 0      | 0      | 2      | 1      | 0      | 0      |
| K20485 ATP-binding cassette, subfamily B, bacterial NisT                                                           | 239    | 231    | 259    | 231    | 30     | 39     | 27     | 37     | 508    | 468    | 494    | 527    |
| K20486 lantibiotic leader peptide-processing serine protease [EC:3.4.21.-]                                         | 93     | 124    | 94     | 120    | 10     | 9      | 5      | 12     | 13     | 3      | 0      | 11     |
| K20487 two-component system, OmpR family, lantibiotic biosynthesis sensor histidine kinase NisK/SpaK [EC:2.7.13.3] | 243    | 271    | 234    | 277    | 85     | 98     | 101    | 88     | 506    | 568    | 526    | 584    |
| K20488 two-component system, OmpR family, lantibiotic biosynthesis response regulator NisR/SpaR                    | 193    | 213    | 200    | 176    | 62     | 77     | 72     | 63     | 331    | 404    | 342    | 320    |
| K20489 lantibiotic immunity protein                                                                                | 19     | 16     | 10     | 11     | 0      | 0      | 0      | 0      | 0      | 0      | 0      | 3      |
| K20973 two-component system, sensor histidine kinase SagS [EC:2.7.13.3]                                            | 3348   | 3247   | 3174   | 3282   | 1693   | 1726   | 1752   | 1793   | 1090   | 957    | 981    | 984    |
| K20974 two-component system, sensor histidine kinase [EC:2.7.13.3]                                                 | 3187   | 2912   | 2857   | 2969   | 1519   | 1512   | 1391   | 1589   | 1175   | 1037   | 965    | 1127   |
| K20975 two-component system, sensor histidine kinase [EC:2.7.13.3]                                                 | 3200   | 3285   | 2805   | 2985   | 1644   | 1505   | 1445   | 1694   | 1068   | 838    | 886    | 885    |
| K20976 histidine phosphotransfer protein HptB                                                                      | 566    | 586    | 522    | 558    | 267    | 308    | 304    | 300    | 203    | 138    | 158    | 154    |
| K20977 two-component system, HptB-dependent secretion and biofilm response regulator                               | 2332   | 2218   | 2287   | 2321   | 1349   | 1339   | 1234   | 1281   | 758    | 729    | 743    | 713    |
| K20978 HptB-dependent secretion and biofilm anti anti-sigma factor                                                 | 464    | 456    | 431    | 389    | 261    | 249    | 225    | 257    | 159    | 142    | 145    | 135    |
| K23236 two-component-system connector protein SaFA                                                                 | 0      | 1      | 0      | 1      | 4      | 2      | 2      | 1      | 13     | 13     | 9      | 17     |
| K23514 RNA polymerase sigma-19 factor, ECF subfamily                                                               | 812    | 8639   | 8150   | 8303   | 6516   | 6306   | 6009   | 6677   | 4279   | 3827   | 4088   | 4107   |
| ko04014 Ras signaling pathway                                                                                      | 0      | 0      | 0      | 0      | 1      | 2      | 0      | 0      | 0      | 0      | 2      | 2      |
| K02677 classical protein kinase C alpha type [EC:2.7.11.13]                                                        | 0      | 0      | 0      | 0      | 0      | 1      | 0      | 0      | 0      | 0      | 0      | 0      |
| K03099 son of sevenless                                                                                            | 0      | 0      | 0      | 0      | 0      | 0      | 0      | 0      | 0      | 0      | 1      | 0      |
| K04393 cell division control protein Rab-52                                                                        | 0      | 0      | 0      | 0      | 1      | 0      | 0      | 0      | 0      | 0      | 0      | 0      |
| K04989 Ras-related protein RhoA                                                                                    | 0      | 0      | 0      | 0      | 0      | 0      | 0      | 0      | 0      | 0      | 0      | 1      |
| K08052 neurofibromin 1                                                                                             | 0      | 0      | 0      | 0      | 0      | 1      | 0      | 0      | 0      | 0      | 0      | 1      |
| ko04015 Rap1 signaling pathway                                                                                     | 0      | 0      | 0      | 0      | 1      | 1      | 0      | 0      | 0      | 0      | 0      | 0      |
| ko04010 MAPK signaling pathway                                                                                     | 0      | 0      | 1      | 1      | 1      | 2      | 0      | 0      | 0      | 1      | 1      | 2      |
| K04733 interleukin-1 receptor-associated kinase 4 [EC:2.7.11.1]                                                    | 0      | 0      | 0      | 1      | 0      | 0      | 0      | 0      | 0      | 1      | 0      | 0      |
| ko04013 MAPK signaling pathway - fly                                                                               | 3045   | 3028   | 2907   | 2997   | 2796   | 2839   | 2806   | 2673   | 2580   | 2571   | 2580   | 2589   |
| K04564 superoxide dismutase, Fe-Mn family [EC:1.15.1.1]                                                            | 3045   | 3028   | 2907   | 2997   | 2796   | 2839   | 2806   | 2673   | 2580   | 2571   | 2579   | 2589   |
| ko04016 MAPK signaling pathway - plant                                                                             | 17254  | 16503  | 16581  | 17093  | 10411  | 10170  | 9933   | 10375  | 10603  | 10833  | 10503  | 10764  |
| K13413 mitogen-activated protein kinase kinase 4/5 [EC:2.7.12.2]                                                   | 0      | 0      | 0      | 0      | 0      | 0      | 0      | 0      | 0      | 0      | 0      | 1      |
| K17686 P-type Cu+ transporter [EC:7.2.2.8]                                                                         | 8786   | 8204   | 8288   | 8572   | 4794   | 4828   | 4534   | 4873   | 5094   | 5467   | 5198   | 5354   |
| K20716 mitogen-activated protein kinase kinase 17/18                                                               | 0      | 0      | 0      | 0      | 0      | 0      | 0      | 0      | 1      | 0      | 0      | 0      |
| ko04011 MAPK signaling pathway - yeast                                                                             | 7195   | 7020   | 7036   | 7212   | 4025   | 3826   | 3777   | 3844   | 4174   | 4142   | 4025   | 4047   |
| K04563 cyclin-dependent kinase [EC:2.7.11.22]                                                                      | 0      | 0      | 0      | 0      | 0      | 0      | 0      | 0      | 0      | 0      | 0      | 0      |
| K06276 3-phosphoinositide dependent protein kinase-1 [EC:2.7.11.1]                                                 | 0      | 0      | 0      | 0      | 0      | 0      | 0      | 0      | 1      | 0      | 0      | 0      |
| K06665 general transcriptional corepressor CYC8                                                                    | 0      | 0      | 0      | 0      | 0      | 0      | 0      | 0      | 0      | 0      | 1      | 0      |
| K11229 mitogen-activated protein kinase kinase kinase [EC:2.7.11.25]                                               | 0      | 0      | 0      | 0      | 0      | 0      | 0      | 0      | 0      | 0      | 0      | 1      |
| K19806 tyrosine-protein phosphatase 2/3 [EC:3.1.3.48]                                                              | 0      | 0      | 0      | 0      | 0      | 0      | 0      | 0      | 0      | 0      | 1      | 0      |
| K19844 GTPase-activating protein BEM2                                                                              | 0      | 0      | 0      | 0      | 0      | 0      | 0      | 0      | 0      | 0      | 1      | 0      |
| K23469 G2/mitotic-specific cyclin 2                                                                                | 0      | 0      | 2      | 0      | 0      | 0      | 0      | 0      | 0      | 0      | 0      | 0      |
| ko04012 ErbB signaling pathway                                                                                     | 0      | 1      | 0      | 0      | 0      | 1      | 0      | 0      | 0      | 0      | 1      | 0      |
| K07203 serine/threonine-protein kinase mTOR [EC:2.7.11.1]                                                          | 0      | 1      | 0      | 0      | 0      | 0      | 0      | 0      | 0      | 0      | 0      | 0      |
| ko04310 Wnt signaling pathway                                                                                      | 0      | 0      | 0      | 0      | 0      | 2      | 0      | 0      | 0      | 0      | 0      | 0      |
| K04496 C-terminal binding protein                                                                                  | 0      | 0      | 0      | 0      | 0      | 1      | 0      | 0      | 0      | 0      | 0      | 0      |
| ko04330 Notch signaling pathway                                                                                    | 0      | 0      | 0      | 0      | 0      | 1      | 0      | 0      | 0      | 0      | 0      | 0      |
| ko04390 Hippo signaling pathway                                                                                    | 1      | 0      | 1      | 0      | 0      | 2      | 0      | 1      | 3      | 0      | 0      | 4      |
| K03982 plasminogen activator inhibitor 1                                                                           | 1      | 0      | 1      | 0      | 0      | 0      | 0      | 1      | 3      | 0      | 0      | 3      |
| ko04370 VEGF signaling pathway                                                                                     | 0      | 0      | 0      | 0      | 1      | 1      | 0      | 0      | 0      | 0      | 0      | 0      |
| ko04371 Angiogenesis signaling pathway                                                                             | 3      | 1      | 1      | 0      | 0      | 0      | 0      | 1      | 3      | 4      | 2      | 6      |
| K07200 5'-AMP-activated protein kinase, regulatory gamma subunit                                                   | 0      | 0      | 0      | 0      | 0      | 0      | 0      | 0      | 0      | 0      | 2      | 0      |
| ko04630 Jak-STAT signaling pathway                                                                                 | 0      | 1      | 0      | 0      | 0      | 0      | 0      | 0      | 0      | 0      | 1      | 0      |
| ko04064 NF-kappa B signaling pathway                                                                               | 0      | 0      | 0      | 1      | 0      | 0      | 0      | 0      | 0      | 0      | 1      | 0      |
| ko04066 HIF-1 signaling pathway                                                                                    | 23815  | 24012  | 23460  | 23637  | 23723  | 24761  | 24150  | 23941  | 23363  | 23128  | 23168  | 23560  |
| ko04068 FoxO signaling pathway                                                                                     | 10256  | 10052  | 9947   | 10208  | 6787   | 6620   | 6625   | 6548   | 6752   | 6676   | 6569   | 6623   |
| ko04020 Calcium signaling pathway                                                                                  | 0      | 0      | 2      | 0      | 0      | 1      | 0      | 0      | 2      | 0      | 1      | 1      |
| K00871 phosphorylase kinase gamma subunit [EC:2.7.11.19]                                                           | 0      | 0      | 0      | 0      | 0      | 0      | 0      | 0      | 2      | 0      | 0      | 0      |
| K05853 P-type Ca2+ transporter type 2A [EC:7.2.2.10]                                                               | 0      | 0      | 2      | 0      | 0      | 0      | 0      | 0      | 0      | 0      | 1      | 0      |
| ko04070 Phosphatidylinositol signaling system                                                                      | 7403   | 7692   | 7646   | 7601   | 9057   | 9096   | 8810   | 8743   | 9092   | 9007   | 9065   | 9039   |
| ko04072 Phospholipase D signaling pathway                                                                          | 927    | 803    | 860    | 901    | 642    | 640    | 545    | 542    | 584    | 584    | 522    | 600    |
| ko04071 Sphingolipid signaling pathway                                                                             | 1013   | 1084   | 1084   | 1083   | 591    | 585    | 534    | 594    | 350    | 336    | 343    | 310    |
| ko04024 cAMP signaling pathway                                                                                     | 0      | 1      | 3      | 1      | 0      | 2      | 0      | 0      | 0      | 1      | 5      | 1      |
| ko04022 cGMP-PKG signaling pathway                                                                                 | 0      | 0      | 2      | 0      | 0      | 2      | 0      | 0      | 0      | 0      | 1      | 1      |
| ko04151 PI3K-Akt signaling pathway                                                                                 | 8065   | 8053   | 8213   | 8244   | 11411  | 11392  | 11495  | 11451  | 9468   | 9430   | 9559   | 9697   |
| K02091 cyclin-dependent kinase 6 [EC:2.7.11.22]                                                                    | 0      | 1      | 0      | 0      | 0      | 0      | 0      | 0      | 0      | 0      | 0      | 0      |
| K00866 target of rapamycin complex subunit LST8                                                                    | 0      | 0      | 0      | 0      | 0      | 0      | 0      | 0      | 1      | 1      | 0      | 0      |
| ko04152 AMPK signaling pathway                                                                                     | 4959   | 5107   | 5036   | 5074   | 4847   | 5184   | 5014   | 4838   | 5442   | 5465   | 5453   | 5433   |
| K02324 elongation factor 2                                                                                         | 1      | 3      | 3      | 0      | 3      | 4      | 1      | 2      | 5      | 16     | 14     | 11     |
| ko04150 mTOR signaling pathway                                                                                     | 2      | 1      | 0      | 1      | 0      | 2      | 0      | 1      | 1      | 0      | 1      | 3      |
| ko04075 Plant hormone signal transduction                                                                          | 0      | 0      | 0      | 0      | 0      | 0      | 0      | 0      | 0      | 0      | 0      | 1      |
| Signaling molecules and interaction                                                                                | 87     | 86     | 94     | 103    | 126    | 97     | 144    | 114    | 110    | 129    | 87     | 106    |
| ko04080 Neuroactive ligand-receptor interaction                                                                    | 87     | 86     | 94     | 103    | 126    | 97     | 144    | 114    | 110    | 129    | 87     | 106    |
| K05770 translocator protein                                                                                        | 87     | 86     | 94     | 103    | 126    | 97     | 144    | 114    | 110    | 129    | 87     | 106    |
| Cellular Processes                                                                                                 | 852554 | 846686 | 827319 | 841913 | 686255 | 687756 | 673266 | 689112 | 616046 | 615205 | 604625 | 613288 |
| Transport and catabolism                                                                                           | 57136  | 59346  | 61196  | 59445  | 113373 | 112532 | 115402 | 112855 | 94031  | 91192  | 93876  | 91212  |
| ko04144 Endocytosis                                                                                                | 19     | 18     | 28     | 22     | 77     | 67     | 0      | 0      | 47     | 57     | 72     | 47     |
| K10365 capping protein (actin filament) muscle Z-line, beta                                                        | 0      | 0      | 0      | 0      | 0      | 0      | 0      | 0      | 0      | 0      | 2      | 0      |
| K12191 charged multivesicular body protein 2A                                                                      | 0      | 0      | 0      | 0      | 1      | 0      | 0      | 0      | 0      | 0      | 0      | 0      |
| K12481 rabenosyn-5                                                                                                 | 0      | 0      | 0      | 0      | 0      | 0      | 0      | 0      | 0      | 0      | 0      | 1      |
| K17917 sorting nexin-3/12                                                                                          | 0      | 0      | 0      | 0      | 0      | 0      | 0      | 0      | 0      | 0      | 0      | 0      |
| ko04145 Phagosome                                                                                                  | 0      | 0      | 1      | 0      | 0      | 0      | 0      | 0      | 0      | 0      | 0      | 0      |
| ko04142 Lysosome                                                                                                   | 0      | 0      | 1      | 0      | 1      | 0      | 0      | 0      | 0      | 0      | 0      | 2      |
| K01279 tripeptidyl-peptidase I [EC:3.4.14.9]                                                                       | 26364  | 28255  | 30655  | 28609  | 79743  | 79515  | 81638  | 79079  | 65050  | 62835  | 65419  | 62526  |
| ko04136 Autophagy - other                                                                                          | 0      | 1      | 1      | 0      | 0      | 1      | 0      | 0      | 0      | 0      | 0      | 0      |
| K12381 arylsulfatase G [EC:3.1.6.-]                                                                                | 3      | 1      | 0      | 1      | 1      | 0      | 1      | 1      | 2      | 3      | 0      | 2      |
| K12399 AP-3 complex subunit sigma                                                                                  | 0      | 1      | 0      | 1      | 0      | 0      | 0      | 0      | 1      | 8      | 3      | 1      |
| K13444 formylglycine-generating enzyme [EC:1.8.3.7]                                                                | 0      | 0      | 1      | 0      | 0      | 0      | 0      | 0      | 0      | 0      | 0      | 0      |
| ko04146 Peroxisome                                                                                                 | 14     | 14     | 7      | 9      | 5      | 5      | 2      | 2      | 11     | 12     | 19     | 13     |
| K00624 carnitine O-acetyltransferase [EC:2.3.1.7]                                                                  | 30480  | 30814  | 30222  | 30538  | 33386  | 32764  | 33610  | 33591  | 28608  | 27944  | 28035  | 28219  |
| K04565 superoxide dismutase, Cu-Zn family [EC:1.15.1.1]                                                            | 0      | 1      | 0      | 0      | 0      | 2      | 0      | 0      | 0      | 0      | 0      | 0      |
| K13343 peroxin-14                                                                                                  | 347    | 403    | 322    | 357    | 229    | 235    | 244    | 260    | 524    | 550    | 489    | 563    |
| ko04140 Autophagy - animal                                                                                         | 0      | 0      | 1      | 0      | 0      | 0      | 0      | 0      | 0      | 0      | 0      | 0      |
| ko04138 Autophagy - yeast                                                                                          | 0      | 1      | 0      | 1      | 0      | 1      | 2      | 1      | 5      | 2      | 1      | 4      |
| K06655 negative regulator of the PHO system [EC:2.7.11.22]                                                         | 272    | 259    | 289    | 275    | 166    | 183    | 154    | 191    | 325    | 356    | 349    | 418    |
| K06902 MFS transporter, UMF1 family                                                                                | 0      | 0      | 1      | 0      | 0      | 0      | 0      | 0      | 0      | 0      | 0      | 0      |
| K12761 carbon catabolite-derepressing protein [EC:2.7.11.1]                                                        | 272    | 258    | 286    | 274    | 165    | 182    | 152    | 188    | 321    | 354    | 349    | 414    |
| K15296 alpha-soluble NSF attachment protein                                                                        | 0      | 0      | 2      | 0      | 0      | 0      | 0      | 0      | 0      | 0      | 0      | 0      |
| K20179 vacuolar protein sorting-associated protein 11                                                              | 0      | 0      | 0      | 0      | 0      | 0      | 0      | 2      | 0      | 0      | 0      | 0      |
| ko04139 Mitophagy - yeast                                                                                          | 0      | 0      |        |        |        |        |        |        |        |        |        |        |

|                                                                                                                                   |        |        |        |        |        |        |        |        |        |        |        |        |
|-----------------------------------------------------------------------------------------------------------------------------------|--------|--------|--------|--------|--------|--------|--------|--------|--------|--------|--------|--------|
| ko04111 Cell cycle - yeast                                                                                                        | 0      | 2      | 4      | 0      | 0      | 0      | 0      | 0      | 0      | 2      | 1      | 2      |
| K06647 transcription factor MBP1                                                                                                  | 0      | 0      | 0      | 0      | 0      | 0      | 0      | 0      | 0      | 0      | 0      | 1      |
| ko04112 Cell cycle - Caulobacter                                                                                                  | 59720  | 60086  | 60909  | 61161  | 70546  | 70690  | 71067  | 69849  | 61788  | 60754  | 61176  | 60755  |
| K01338 ATP-dependent Lon protease [EC:3.4.21.53]                                                                                  | 7617   | 7601   | 7965   | 8096   | 8182   | 8413   | 8263   | 8171   | 8224   | 7962   | 8251   | 8173   |
| K01358 ATP-dependent Clp protease, protease subunit [EC:3.4.21.92]                                                                | 3123   | 3062   | 3133   | 3180   | 3074   | 3048   | 3016   | 3028   | 2738   | 2718   | 2749   | 2793   |
| K02651 pilus assembly protein Flp/PIIA                                                                                            | 322    | 325    | 346    | 361    | 213    | 188    | 179    | 204    | 125    | 107    | 110    | 98     |
| K03531 cell division protein FtsZ                                                                                                 | 3266   | 3160   | 3281   | 3324   | 4560   | 4673   | 4678   | 4325   | 4201   | 4482   | 4094   | 4068   |
| K03544 ATP-dependent Clp protease ATP-binding subunit ClpX                                                                        | 3450   | 3474   | 3607   | 3551   | 3940   | 3963   | 4181   | 3954   | 4058   | 4384   | 4286   | 4243   |
| K03588 cell division protein FtsW                                                                                                 | 4155   | 4338   | 4488   | 4244   | 4947   | 4868   | 4635   | 4880   | 4828   | 4564   | 4411   | 4501   |
| K03589 cell division protein FtsQ                                                                                                 | 2766   | 2927   | 2756   | 2849   | 3055   | 2966   | 2992   | 2812   | 2724   | 2693   | 2764   | 2683   |
| K03590 cell division protein FtsA                                                                                                 | 2525   | 2803   | 2862   | 2670   | 4311   | 4407   | 4183   | 4209   | 3755   | 3651   | 3748   | 3749   |
| K06985 aspartyl protease family protein                                                                                           | 2432   | 2397   | 2238   | 2323   | 2718   | 2787   | 2804   | 2725   | 1973   | 1729   | 2027   | 1981   |
| K11749 regulator of sigma E protease [EC:3.4.24.-]                                                                                | 4442   | 4239   | 4221   | 4337   | 4908   | 4637   | 4943   | 4645   | 4369   | 4344   | 4144   | 4345   |
| K13581 modification methylase [EC:2.1.1.72]                                                                                       | 1      | 2      | 2      | 0      | 1      | 0      | 0      | 0      | 1      | 1      | 4      | 2      |
| K13582 localization factor PodJL                                                                                                  | 2      | 2      | 2      | 0      | 0      | 2      | 0      | 1      | 6      | 4      | 5      | 7      |
| K13583 GcrA cell cycle regulator                                                                                                  | 0      | 0      | 0      | 0      | 2      | 4      | 1      | 1      | 0      | 2      | 1      | 0      |
| K13590 diguanylate cyclase [EC:2.7.7.65]                                                                                          | 4013   | 3997   | 3896   | 3898   | 2315   | 2157   | 2082   | 2171   | 1320   | 1252   | 1212   | 1287   |
| K13592 regulator of CtrA degradation                                                                                              | 2      | 0      | 2      | 0      | 0      | 0      | 2      | 0      | 0      | 0      | 8      | 1      |
| ko04113 Meiosis - yeast                                                                                                           | 1713   | 1628   | 1473   | 1628   | 874    | 804    | 827    | 846    | 577    | 476    | 507    | 510    |
| K10878 meiotic recombination protein SPO11                                                                                        | 0      | 3      | 0      | 0      | 0      | 0      | 0      | 0      | 0      | 0      | 0      | 0      |
| K12762 G protein-coupled receptor GPR1                                                                                            | 0      | 2      | 0      | 0      | 0      | 2      | 0      | 0      | 0      | 0      | 0      | 0      |
| ko04114 Oocyte meiosis                                                                                                            | 0      | 2      | 1      | 0      | 0      | 2      | 0      | 0      | 0      | 0      | 0      | 1      |
| ko04210 Apoptosis                                                                                                                 | 4779   | 4705   | 4695   | 4691   | 7191   | 7152   | 7076   | 7293   | 5276   | 4819   | 5016   | 4828   |
| K01173 endonuclease G, mitochondrial                                                                                              | 4240   | 4259   | 4225   | 4196   | 6905   | 6884   | 6810   | 7026   | 5063   | 4657   | 4869   | 4680   |
| ko04214 Apoptosis - fly                                                                                                           | 4512   | 4329   | 4375   | 4352   | 3495   | 3526   | 3510   | 3422   | 3243   | 3293   | 3203   | 3222   |
| K03386 peroxiredoxin [alkyl hydroperoxide reductase subunit C] [EC:1.11.1.15]                                                     | 3889   | 3798   | 3811   | 3756   | 3084   | 3162   | 3103   | 3042   | 2927   | 3006   | 2970   | 2974   |
| ko04215 Apoptosis - multiple species                                                                                              | 536    | 445    | 470    | 493    | 285    | 267    | 263    | 266    | 206    | 158    | 146    | 142    |
| ko04216 Ferroptosis                                                                                                               | 10372  | 11098  | 11007  | 10856  | 18986  | 18536  | 19293  | 19142  | 15352  | 14871  | 14985  | 14862  |
| ko04217 Necroptosis                                                                                                               | 38168  | 37764  | 38125  | 37814  | 42187  | 41619  | 41898  | 42090  | 36446  | 36833  | 37110  | 36746  |
| K03767 peptidyl-prolyl cis-trans isomerase A (cyclophilin A) [EC:5.2.1.8]                                                         | 1305   | 1186   | 1310   | 1288   | 815    | 735    | 717    | 827    | 884    | 877    | 828    | 854    |
| ko04115 p53 signaling pathway                                                                                                     | 537    | 446    | 471    | 493    | 285    | 267    | 263    | 267    | 209    | 158    | 146    | 145    |
| ko04218 Cellular senescence                                                                                                       | 1      | 2      | 1      | 0      | 2      | 2      | 0      | 1      | 3      | 0      | 0      | 4      |
| Cellular community - eukaryotes                                                                                                   | 2      | 0      | 0      | 1      | 2      | 3      | 0      | 1      | 3      | 4      | 6      | 5      |
| ko04510 Focal adhesion                                                                                                            | 0      | 0      | 0      | 0      | 1      | 3      | 0      | 0      | 1      | 0      | 1      | 1      |
| ko04520 Adherens junction                                                                                                         | 0      | 0      | 0      | 0      | 1      | 0      | 0      | 0      | 0      | 0      | 0      | 0      |
| ko04530 Tight junction                                                                                                            | 1      | 0      | 0      | 1      | 2      | 0      | 0      | 1      | 2      | 4      | 5      | 4      |
| ko04540 Gap junction                                                                                                              | 0      | 0      | 0      | 0      | 0      | 1      | 0      | 0      | 0      | 0      | 1      | 0      |
| ko04550 Signaling pathways regulating pluripotency of stem cells                                                                  | 1      | 0      | 0      | 0      | 0      | 0      | 0      | 0      | 0      | 0      | 0      | 0      |
| K14439 SWI/SNF-related matrix-associated actin-dependent regulator of chromatin subfamily A containing DEAD/H box 1 [EC:3.6.4.12] | 1      | 0      | 0      | 0      | 0      | 0      | 0      | 0      | 0      | 0      | 0      | 0      |
| Cellular community - prokaryotes                                                                                                  | 561723 | 557523 | 538207 | 551468 | 386790 | 387392 | 376995 | 392329 | 374917 | 376662 | 365223 | 375727 |
| K02024 Quorum sensing                                                                                                             | 269533 | 268066 | 263584 | 268201 | 195748 | 196687 | 193120 | 197908 | 202660 | 205771 | 200171 | 204364 |
| K01318 glutamyl endopeptidase [EC:3.4.21.19]                                                                                      | 0      | 1      | 2      | 0      | 1      | 2      | 0      | 1      | 0      | 1      | 3      | 7      |
| K01399 pseudodolysin [EC:3.4.24.26]                                                                                               | 2326   | 2348   | 2320   | 2316   | 1363   | 1284   | 1249   | 1447   | 724    | 714    | 694    | 774    |
| K02031 peptide/nickel transport system ATP-binding protein                                                                        | 4119   | 4068   | 3953   | 4183   | 1432   | 1678   | 1495   | 1523   | 4947   | 5162   | 4987   | 5172   |
| K02032 peptide/nickel transport system ATP-binding protein                                                                        | 2972   | 2980   | 2797   | 3048   | 1268   | 1290   | 1220   | 1225   | 4479   | 4652   | 4384   | 4538   |
| K02033 peptide/nickel transport system permease protein                                                                           | 5025   | 4949   | 4791   | 4998   | 2095   | 2167   | 2083   | 1870   | 6403   | 6572   | 6573   | 6542   |
| K02034 peptide/nickel transport system permease protein                                                                           | 5217   | 4944   | 5007   | 5244   | 2193   | 2308   | 2107   | 2118   | 6039   | 6250   | 5817   | 6129   |
| K02035 peptide/nickel transport system substrate-binding protein                                                                  | 10637  | 10571  | 10359  | 10567  | 5462   | 5515   | 5272   | 5446   | 10203  | 10800  | 10154  | 10829  |
| K02052 putative spermidine/putrescine transport system ATP-binding protein                                                        | 4397   | 4422   | 4392   | 4387   | 2545   | 2640   | 2494   | 2609   | 2122   | 2153   | 2071   | 2180   |
| K02053 putative spermidine/putrescine transport system permease protein                                                           | 1936   | 1972   | 1781   | 2016   | 1152   | 1176   | 1342   | 1333   | 1146   | 1162   | 1175   | 1178   |
| K02054 putative spermidine/putrescine transport system permease protein                                                           | 2868   | 2916   | 2878   | 2854   | 1587   | 1707   | 1625   | 1627   | 1424   | 1545   | 1505   | 1541   |
| K02055 putative spermidine/putrescine transport system substrate-binding protein                                                  | 8661   | 8595   | 8348   | 8431   | 4986   | 4958   | 4743   | 5005   | 3415   | 3502   | 3450   | 3587   |
| K02250 competence protein ComK                                                                                                    | 0      | 3      | 3      | 0      | 0      | 0      | 0      | 0      | 0      | 0      | 2      | 1      |
| K02251 competence protein ComQ                                                                                                    | 0      | 0      | 0      | 2      | 0      | 0      | 0      | 3      | 0      | 0      | 0      | 0      |
| K07344 type IV secretion system protein TrbL                                                                                      | 4077   | 3982   | 4026   | 3967   | 2284   | 2189   | 2170   | 2469   | 1272   | 1194   | 1232   | 1206   |
| K08321 3-hydroxy-5-phosphonoxy-pentane-2,4-dione thiolase [EC:2.3.1.245]                                                          | 571    | 535    | 471    | 549    | 402    | 446    | 434    | 458    | 653    | 774    | 712    | 737    |
| K08605 coccolysin [EC:3.4.24.30]                                                                                                  | 84     | 75     | 44     | 68     | 9      | 12     | 9      | 7      | 47     | 79     | 76     | 72     |
| K08642 LaS protease [EC:3.4.24.-]                                                                                                 | 1740   | 1674   | 1595   | 1614   | 923    | 855    | 776    | 879    | 551    | 524    | 481    | 475    |
| K09823 Fur family transcriptional regulator, zinc uptake regulator                                                                | 582    | 587    | 535    | 524    | 402    | 418    | 345    | 346    | 596    | 605    | 636    | 624    |
| K09936 bacterial/archaeal transporter family-2 protein                                                                            | 2202   | 2199   | 2024   | 2025   | 1037   | 976    | 977    | 1001   | 1602   | 1779   | 1621   | 1608   |
| K11031 thiol-activated cytolysin                                                                                                  | 279    | 292    | 312    | 329    | 490    | 405    | 470    | 514    | 30     | 61     | 45     | 47     |
| K11035 hemolysin BL binding component                                                                                             | 0      | 0      | 0      | 0      | 0      | 0      | 0      | 2      | 0      | 0      | 0      | 0      |
| K11063 toxin A/B                                                                                                                  | 0      | 0      | 0      | 0      | 0      | 0      | 0      | 0      | 0      | 0      | 0      | 1      |
| K11216 autoinducer-2 kinase [EC:2.7.1.189]                                                                                        | 1013   | 968    | 960    | 1053   | 803    | 764    | 828    | 872    | 1197   | 1334   | 1296   | 1361   |
| K11530 (4S)-4-hydroxy-5-phosphonoxy-pentane-2,3-dione isomerase [EC:5.3.1.32]                                                     | 655    | 632    | 611    | 653    | 413    | 395    | 366    | 428    | 355    | 369    | 340    | 364    |
| K11531 lsr operon transcriptional repressor                                                                                       | 647    | 590    | 667    | 621    | 414    | 405    | 416    | 411    | 877    | 765    | 821    | 938    |
| K12990 rhamnosyltransferase [EC:2.4.1.-]                                                                                          | 472    | 458    | 405    | 465    | 215    | 201    | 188    | 244    | 126    | 129    | 87     | 130    |
| K13075 N-acyl homoserine lactone hydrolase [EC:3.1.1.81]                                                                          | 288    | 292    | 258    | 245    | 97     | 99     | 108    | 95     | 683    | 640    | 581    | 584    |
| K14051 c-di-GMP phosphodiesterase Gmr [EC:3.1.4.52]                                                                               | 393    | 378    | 372    | 368    | 494    | 618    | 558    | 527    | 101    | 93     | 109    | 95     |
| K14645 serine protease [EC:3.4.21.-]                                                                                              | 5      | 1      | 2      | 1      | 5      | 4      | 9      | 7      | 0      | 2      | 0      | 1      |
| K18099 LuxR family transcriptional regulator, quorum-sensing system regulator RhlR                                                | 1069   | 1022   | 990    | 1045   | 570    | 575    | 612    | 639    | 348    | 339    | 314    | 377    |
| K18100 rhamnosyltransferase subunit A [EC:2.4.1.-]                                                                                | 1252   | 1155   | 1317   | 1211   | 696    | 728    | 762    | 740    | 406    | 386    | 418    | 376    |
| K18101 rhamnosyltransferase subunit B [EC:2.4.1.-]                                                                                | 2051   | 2050   | 1964   | 2090   | 1147   | 1151   | 1038   | 1109   | 617    | 608    | 590    | 592    |
| K18139 outer membrane protein, multidrug efflux system                                                                            | 3509   | 3553   | 3566   | 3778   | 4510   | 4584   | 4565   | 4586   | 4067   | 3807   | 3808   | 3905   |
| K18304 LuxR family transcriptional regulator, quorum-sensing system regulator LasR                                                | 3      | 2      | 2      | 2      | 0      | 3      | 0      | 2      | 0      | 0      | 0      | 0      |
| K18306 membrane fusion protein, multidrug efflux system                                                                           | 1429   | 1472   | 1246   | 1319   | 772    | 681    | 806    | 905    | 439    | 408    | 441    | 398    |
| K18307 multidrug efflux pump                                                                                                      | 2755   | 2747   | 2533   | 2560   | 1499   | 1438   | 1382   | 1657   | 962    | 896    | 741    | 880    |
| K19735 LuxR family transcriptional regulator, quorum-sensing system regulator MvR                                                 | 1552   | 1457   | 1456   | 1452   | 853    | 898    | 788    | 859    | 498    | 461    | 428    | 458    |
| K02052 LuxR family transcriptional regulator, quorum-sensing system regulator CnR                                                 | 0      | 0      | 0      | 0      | 0      | 0      | 0      | 0      | 0      | 0      | 0      | 1      |
| K02058 PA-I galactophilic lectin                                                                                                  | 373    | 406    | 400    | 379    | 226    | 200    | 163    | 214    | 118    | 111    | 120    | 125    |
| K02059 PA-III fucose-binding lectin                                                                                               | 500    | 508    | 483    | 554    | 257    | 269    | 267    | 227    | 153    | 194    | 151    | 159    |
| K02065 glutamate:GABA antiporter                                                                                                  | 3106   | 3243   | 3093   | 3117   | 4571   | 4411   | 4271   | 4472   | 3520   | 3383   | 3469   | 3350   |
| K02066 type IV secretion system protein TrbJ                                                                                      | 3280   | 3200   | 3279   | 3197   | 1777   | 1788   | 1352   | 1480   | 959    | 948    | 964    | 979    |
| K02071 DeoR family transcriptional regulator, repressor of opine catabolism and conjugal transfer                                 | 0      | 0      | 0      | 0      | 0      | 0      | 0      | 0      | 2      | 4      | 2      | 2      |
| K02076 large repetitive protein                                                                                                   | 8703   | 8291   | 7610   | 7945   | 6911   | 7360   | 7690   | 8251   | 1583   | 1572   | 1443   | 1571   |
| K02077 mannose-binding lectin                                                                                                     | 564    | 558    | 523    | 563    | 273    | 297    | 287    | 315    | 181    | 143    | 170    | 169    |
| K02045 membrane fusion protein, peptide pheromone/bacteriocin exporter                                                            | 129    | 147    | 162    | 132    | 249    | 238    | 254    | 201    | 81     | 128    | 119    | 107    |
| K02073 HTH-type transcriptional regulator, SHP2-responsive activator                                                              | 3      | 0      | 2      | 3      | 0      | 0      | 2      | 1      | 0      | 2      | 0      | 0      |
| K02075 HTH-type transcriptional regulator, pheromone-responsive regulator                                                         | 0      | 0      | 0      | 0      | 5      | 7      | 3      | 8      | 14     | 14     | 17     | 20     |
| K02077 HTH-type transcriptional regulator, major conjugation operon repressor                                                     | 13     | 12     | 6      | 5      | 0      | 0      | 0      | 0      | 0      | 0      | 0      | 0      |
| K02079 sex pheromone cAD1                                                                                                         | 48     | 67     | 58     | 74     | 7      | 13     | 5      | 12     | 51     | 69     | 24     | 58     |
| K02080 HTH-type transcriptional regulator, pheromone-responsive repressor                                                         | 69     | 58     | 91     | 76     | 8      | 7      | 5      | 7      | 4      | 0      | 3      | 5      |
| K02081 regulatory protein                                                                                                         | 33     | 32     | 32     | 28     | 3      | 4      | 8      | 5      | 2      | 18     | 4      | 4      |
| K02082 aggregation substance                                                                                                      | 280    | 308    | 308    | 310    | 20     | 17     | 14     | 23     | 25     | 13     | 17     | 15     |
| K02083 CylL protein                                                                                                               | 19     | 16     | 30     | 20     | 5      | 0      | 0      | 3      | 0      | 1      | 1      | 0      |
| K02084 CylL-S protein                                                                                                             | 24     | 13     | 11     | 19     | 2      | 1      | 2      | 0      | 0      | 2      | 2      | 1      |
| K02085 CylM protein                                                                                                               | 210    | 235    | 217    | 247    | 14     | 16     | 9      | 15     | 5      | 16     | 10     | 5      |
| K02087 regulatory protein CylR1                                                                                                   | 9      | 13     | 12     | 10     | 0      | 1      | 0      | 0      | 1      | 1      | 0      | 0      |
| K02088 HTH-type transcriptional regulator, cytolysin regulator                                                                    | 8      | 9      | 14     | 11     | 0      | 1      | 0      | 0      | 0      | 2      | 3      | 0      |
| K02480 HTH-type transcriptional regulator, quorum sensing regulator NprR                                                          | 2      | 0      | 2      | 0      | 0      | 0      | 0      | 3      | 1      | 1      | 2      | 3      |
| K05027 type IV secretion system protein TrbB [EC:7.4.2.8]                                                                         | 3292   | 3231   | 3157   | 3261   | 1770   | 1713   | 1661   | 1715   | 1064   | 928    | 936    | 944    |
| K05028 type IV secretion system protein TrbC                                                                                      | 1079   | 1060   | 1037   | 1016   | 599    | 615    | 506    | 607    | 321    | 298    | 302    | 334    |
| K05029 type IV secretion system protein TrbD                                                                                      | 750    | 779    | 775    | 730    | 375    | 417    | 398    | 393    | 219    | 212    | 211    | 208    |
| K05030 type IV secretion system protein TrbE [EC:7.4.2.8]                                                                         | 8042   | 7997   | 7602   | 8030   | 4280   | 4199   | 4173   | 4688   | 2493   | 2407   | 2373   | 2514   |
| K0                                                                                                                                |        |        |        |        |        |        |        |        |        |        |        |        |

|                                                                                                 |        |        |        |        |        |        |        |        |       |       |       |       |
|-------------------------------------------------------------------------------------------------|--------|--------|--------|--------|--------|--------|--------|--------|-------|-------|-------|-------|
| K20955 diguanylate cyclase [EC:2.7.7.65]                                                        | 0      | 0      | 0      | 0      | 0      | 0      | 0      | 1      | 0     | 0     | 0     | 0     |
| K20956 diguanylate cyclase [EC:2.7.7.65]                                                        | 0      | 0      | 1      | 0      | 1      | 0      | 0      | 0      | 0     | 0     | 0     | 1     |
| K20957 diguanylate cyclase [EC:2.7.7.65]                                                        | 2      | 2      | 1      | 0      | 0      | 0      | 0      | 0      | 0     | 0     | 1     | 0     |
| K20959 diguanylate cyclase [EC:2.7.7.65]                                                        | 0      | 1      | 0      | 2      | 2      | 2      | 0      | 1      | 0     | 0     | 0     | 2     |
| K20962 c-di-GMP phosphodiesterase [EC:3.1.4.52]                                                 | 1      | 0      | 1      | 0      | 0      | 0      | 0      | 0      | 0     | 0     | 0     | 0     |
| K20965 c-di-GMP phosphodiesterase [EC:3.1.4.52]                                                 | 1      | 0      | 1      | 0      | 0      | 0      | 0      | 0      | 1     | 0     | 2     | 1     |
| K20966 c-di-GMP phosphodiesterase [EC:3.1.4.52]                                                 | 9      | 10     | 5      | 7      | 2      | 0      | 0      | 1      | 2     | 4     | 4     | 5     |
| K20988 polysaccharide biosynthesis/export protein VpsN                                          | 0      | 0      | 3      | 0      | 0      | 0      | 0      | 0      | 0     | 0     | 2     | 0     |
| ko02025 Biofilm formation - Pseudomonas aeruginosa                                              | 197505 | 194776 | 185121 | 190346 | 112339 | 111490 | 106507 | 115329 | 80408 | 77735 | 74610 | 78166 |
| K11890 type VI secretion system protein ImpM                                                    | 889    | 780    | 674    | 807    | 510    | 538    | 533    | 596    | 243   | 192   | 191   | 187   |
| K11893 type VI secretion system protein ImpI                                                    | 6081   | 5798   | 5460   | 5615   | 3329   | 3372   | 3140   | 3184   | 3333  | 3324  | 3054  | 3176  |
| K11895 type VI secretion system protein ImpH                                                    | 5736   | 5720   | 5227   | 5540   | 3380   | 3399   | 3045   | 3343   | 2659  | 2725  | 2684  | 2760  |
| K11900 type VI secretion system protein ImpC                                                    | 6497   | 6612   | 6290   | 6482   | 3859   | 4000   | 3646   | 4078   | 2743  | 2594  | 2615  | 2669  |
| K11901 type VI secretion system protein ImpB                                                    | 2701   | 2737   | 2551   | 2664   | 1553   | 1578   | 1581   | 1646   | 1116  | 1108  | 1039  | 1186  |
| K11902 type VI secretion system protein ImpA                                                    | 3531   | 3402   | 3026   | 3247   | 2030   | 1925   | 1714   | 1852   | 988   | 897   | 830   | 973   |
| K12992 rhamnosyltransferase [EC:2.4.1.-]                                                        | 1687   | 1603   | 1482   | 1568   | 787    | 695    | 681    | 687    | 682   | 618   | 590   | 678   |
| K20968 AraC family transcriptional regulator, exoenzyme S synthesis regulatory protein ExsA     | 154    | 175    | 190    | 209    | 109    | 111    | 88     | 102    | 49    | 49    | 54    | 50    |
| K20971 two-component system, sensor histidine kinase LadS                                       | 42     | 55     | 38     | 44     | 19     | 28     | 171    | 223    | 16    | 27    | 16    | 17    |
| K20972 two-component system, sensor histidine kinase RetS                                       | 432    | 454    | 404    | 413    | 256    | 226    | 196    | 228    | 168   | 111   | 132   | 149   |
| K20987 polysaccharide biosynthesis/export protein PsdI                                          | 108    | 127    | 94     | 103    | 51     | 44     | 46     | 55     | 40    | 27    | 24    | 30    |
| K20997 polysaccharide biosynthesis protein PsIA                                                 | 1967   | 1897   | 1876   | 1921   | 1082   | 1020   | 982    | 976    | 616   | 555   | 483   | 571   |
| K20998 polysaccharide biosynthesis protein PsIE                                                 | 6      | 5      | 5      | 7      | 1      | 3      | 3      | 1      | 2     | 2     | 1     | 2     |
| K20999 polysaccharide biosynthesis protein PsIF                                                 | 1296   | 1364   | 1273   | 1311   | 732    | 668    | 640    | 700    | 456   | 418   | 410   | 421   |
| K21000 polysaccharide biosynthesis protein PsIG                                                 | 388    | 345    | 288    | 311    | 182    | 186    | 187    | 207    | 116   | 101   | 90    | 88    |
| K21001 polysaccharide biosynthesis protein PsIH                                                 | 1653   | 1503   | 1378   | 1484   | 734    | 830    | 738    | 826    | 463   | 468   | 409   | 402   |
| K21002 polysaccharide biosynthesis protein PsII                                                 | 1437   | 1257   | 1138   | 1263   | 641    | 682    | 558    | 668    | 400   | 385   | 308   | 410   |
| K21003 polysaccharide biosynthesis protein PsII                                                 | 962    | 1052   | 917    | 919    | 489    | 467    | 459    | 510    | 320   | 317   | 243   | 287   |
| K21004 polysaccharide biosynthesis protein PsIK                                                 | 1704   | 1704   | 1462   | 1638   | 845    | 837    | 743    | 896    | 451   | 448   | 426   | 467   |
| K21005 polysaccharide biosynthesis protein PsIL                                                 | 374    | 373    | 350    | 350    | 180    | 188    | 167    | 227    | 109   | 91    | 107   | 120   |
| K21006 polysaccharide biosynthesis protein PeIA                                                 | 3802   | 3722   | 3393   | 3447   | 1959   | 1783   | 1808   | 2021   | 1088  | 1087  | 1116  | 1167  |
| K21007 polysaccharide biosynthesis protein PeIB                                                 | 3546   | 3424   | 3145   | 3192   | 1730   | 1712   | 1785   | 1823   | 1091  | 945   | 1039  | 976   |
| K21008 polysaccharide biosynthesis protein PeIC                                                 | 124    | 100    | 91     | 91     | 84     | 58     | 49     | 57     | 39    | 30    | 33    | 34    |
| K21009 polysaccharide biosynthesis protein PeID                                                 | 1295   | 1296   | 1201   | 1214   | 676    | 637    | 637    | 775    | 441   | 388   | 373   | 379   |
| K21010 polysaccharide biosynthesis protein PeIE                                                 | 1086   | 1032   | 1114   | 1066   | 610    | 588    | 563    | 580    | 359   | 373   | 299   | 319   |
| K21011 polysaccharide biosynthesis protein PeIF                                                 | 2162   | 2091   | 2192   | 2145   | 1161   | 1252   | 1098   | 1154   | 819   | 725   | 715   | 776   |
| K21012 polysaccharide biosynthesis protein PeIG                                                 | 1961   | 1948   | 2048   | 1961   | 1092   | 1002   | 1044   | 1089   | 649   | 655   | 703   | 667   |
| K21019 diguanylate cyclase [EC:2.7.7.65]                                                        | 2142   | 2191   | 2015   | 2029   | 1192   | 1257   | 1121   | 1118   | 714   | 662   | 610   | 657   |
| K21020 diguanylate cyclase [EC:2.7.7.65]                                                        | 1607   | 1550   | 1538   | 1575   | 915    | 857    | 787    | 885    | 536   | 497   | 437   | 488   |
| K21021 diguanylate cyclase [EC:2.7.7.65]                                                        | 2573   | 2370   | 2307   | 2348   | 1175   | 1145   | 1024   | 1195   | 1552  | 1451  | 1381  | 1551  |
| K21022 diguanylate cyclase [EC:2.7.7.65]                                                        | 1871   | 1730   | 1770   | 1663   | 891    | 883    | 899    | 983    | 520   | 596   | 535   | 548   |
| K21023 diguanylate cyclase [EC:2.7.7.65]                                                        | 1197   | 1199   | 1131   | 1293   | 1304   | 1303   | 1333   | 1325   | 171   | 186   | 173   | 179   |
| K21024 c-di-GMP phosphodiesterase [EC:3.1.4.52]                                                 | 3285   | 3215   | 3094   | 3172   | 1757   | 1800   | 1678   | 1935   | 1033  | 1026  | 1018  | 1060  |
| K21025 multidomain signaling protein FimX                                                       | 1367   | 1329   | 1297   | 1347   | 789    | 838    | 688    | 804    | 446   | 451   | 419   | 439   |
| K23127 cyclic-di-GMP-binding protein                                                            | 2914   | 2762   | 2722   | 2817   | 1521   | 1517   | 1524   | 1572   | 861   | 928   | 889   | 927   |
| ko02026 Biofilm formation - Escherichia coli                                                    | 70504  | 70566  | 68389  | 70531  | 55029  | 56103  | 54450  | 54952  | 66313 | 68170 | 66065 | 68148 |
| K02425 regulator of sigma 5 factor FlIZ                                                         | 110    | 107    | 103    | 76     | 164    | 187    | 156    | 145    | 21    | 25    | 33    | 20    |
| K03566 LysR family transcriptional regulator, glycine cleavage system transcriptional activator | 5336   | 5334   | 4976   | 5280   | 3537   | 3561   | 3236   | 3655   | 4335  | 4519  | 4184  | 4455  |
| K03567 glycine cleavage system transcriptional repressor                                        | 1285   | 1360   | 1280   | 1306   | 778    | 846    | 750    | 774    | 1040  | 1076  | 952   | 1115  |
| K04333 LuxR family transcriptional regulator, csgAB operon transcriptional regulatory protein   | 401    | 395    | 361    | 403    | 243    | 263    | 252    | 298    | 482   | 524   | 494   | 563   |
| K04334 major curlin subunit                                                                     | 92     | 97     | 103    | 118    | 122    | 142    | 94     | 69     | 21    | 22    | 32    | 18    |
| K04335 minor curlin subunit                                                                     | 33     | 33     | 24     | 32     | 51     | 59     | 55     | 48     | 12    | 7     | 11    | 9     |
| K04336 curli production protein                                                                 | 68     | 67     | 62     | 64     | 108    | 96     | 87     | 122    | 30    | 11    | 29    | 28    |
| K04761 LysR family transcriptional regulator, hydrogen peroxide-inducible genes activator       | 3045   | 2983   | 2944   | 3090   | 3729   | 3509   | 3607   | 3738   | 2635  | 2622  | 2625  | 2597  |
| K06204 DnaK suppressor protein                                                                  | 1816   | 1785   | 1720   | 1691   | 1047   | 1083   | 1068   | 1114   | 1004  | 918   | 918   | 957   |
| K11931 poly-beta-1,6-N-acetyl-D-glucosamine N-deacetylase [EC:3.5.1.-]                          | 922    | 877    | 860    | 863    | 213    | 241    | 251    | 249    | 1742  | 1737  | 1759  | 1930  |
| K11935 biofilm PGA synthesis protein PgaA                                                       | 972    | 1019   | 984    | 945    | 280    | 254    | 303    | 267    | 2140  | 2294  | 2206  | 2247  |
| K11936 poly-beta-1,6-N-acetyl-D-glucosamine synthase [EC:2.4.1.-]                               | 544    | 533    | 519    | 597    | 181    | 139    | 143    | 147    | 1154  | 1191  | 1123  | 1139  |
| K11937 biofilm PGA synthesis protein PgaD                                                       | 145    | 181    | 181    | 180    | 50     | 43     | 55     | 67     | 383   | 408   | 407   | 374   |
| K12687 antigen 43                                                                               | 15     | 7      | 5      | 9      | 29     | 33     | 13     | 22     | 114   | 118   | 113   | 115   |
| K18958 diguanylate cyclase [EC:2.7.7.65]                                                        | 242    | 207    | 181    | 206    | 353    | 366    | 380    | 329    | 85    | 61    | 77    | 74    |
| K21084 diguanylate cyclase [EC:2.7.7.65]                                                        | 773    | 691    | 710    | 683    | 948    | 1094   | 1075   | 966    | 207   | 196   | 282   | 238   |
| K21085 diguanylate cyclase [EC:2.7.7.65]                                                        | 887    | 923    | 902    | 845    | 583    | 707    | 616    | 615    | 1160  | 1287  | 1265  | 1284  |
| K21086 c-di-GMP phosphodiesterase [EC:3.1.4.52]                                                 | 508    | 444    | 399    | 433    | 341    | 284    | 337    | 307    | 539   | 588   | 554   | 587   |
| K21087 flagellar brake protein                                                                  | 168    | 129    | 154    | 155    | 244    | 226    | 231    | 198    | 50    | 35    | 38    | 44    |
| K21088 diguanylate cyclase [EC:2.7.7.65]                                                        | 602    | 571    | 625    | 672    | 458    | 498    | 442    | 440    | 876   | 847   | 863   | 942   |
| K21089 MerR family transcriptional regulator, activator of the csq genes                        | 166    | 143    | 146    | 152    | 246    | 222    | 211    | 236    | 28    | 44    | 44    | 39    |
| K21090 c-di-GMP phosphodiesterase [EC:3.1.4.52]                                                 | 881    | 837    | 787    | 915    | 663    | 631    | 663    | 622    | 1098  | 1194  | 1177  | 1282  |
| Cell motility                                                                                   | 142652 | 139723 | 136489 | 139293 | 88504  | 90244  | 83421  | 86997  | 62180 | 63149 | 60881 | 62317 |
| ko02030 Bacterial chemotaxis                                                                    | 98814  | 96934  | 94197  | 95789  | 62468  | 63504  | 58017  | 60325  | 42698 | 42722 | 41364 | 42374 |
| K02410 flagellar motor switch protein FlIG                                                      | 2057   | 1899   | 1896   | 1947   | 1123   | 1112   | 1064   | 1080   | 1137  | 1219  | 1158  | 1215  |
| K02416 flagellar motor switch protein FlIM                                                      | 2209   | 2191   | 2104   | 2218   | 1200   | 1299   | 1232   | 1181   | 1128  | 1095  | 1091  | 1117  |
| K02417 flagellar motor switch protein FlIN/FlIY                                                 | 1652   | 1638   | 1632   | 1633   | 683    | 778    | 672    | 734    | 844   | 1017  | 976   | 969   |
| K02557 chemotaxis protein MotB                                                                  | 3165   | 3098   | 3216   | 3065   | 3340   | 3665   | 3283   | 3221   | 2722  | 2564  | 2653  | 2498  |
| K03409 chemotaxis protein CheX                                                                  | 2      | 2      | 2      | 0      | 0      | 0      | 0      | 0      | 0     | 0     | 0     | 0     |
| K03410 chemotaxis protein CheC                                                                  | 346    | 308    | 340    | 356    | 233    | 276    | 268    | 235    | 407   | 392   | 438   | 403   |
| K03411 chemotaxis protein CheD [EC:3.1.1.44]                                                    | 1395   | 1213   | 1131   | 1220   | 601    | 629    | 597    | 693    | 659   | 617   | 554   | 586   |
| K03414 chemotaxis protein CheZ                                                                  | 693    | 632    | 654    | 648    | 427    | 398    | 460    | 462    | 208   | 192   | 161   | 181   |
| ko02040 Flagellar assembly                                                                      | 55198  | 53757  | 53256  | 54569  | 33501  | 34441  | 32808  | 34082  | 26444 | 27453 | 26412 | 26790 |
| K02386 flagella basal body P-ring formation protein FlgA                                        | 1260   | 1313   | 1262   | 1214   | 721    | 773    | 763    | 858    | 324   | 396   | 333   | 334   |
| K02387 flagellar basal-body rod protein FlgB                                                    | 603    | 642    | 678    | 651    | 360    | 327    | 382    | 359    | 298   | 306   | 329   | 348   |
| K02388 flagellar basal-body rod protein FlgC                                                    | 985    | 918    | 987    | 986    | 529    | 525    | 496    | 512    | 537   | 563   | 495   | 556   |
| K02389 flagellar basal-body rod modification protein FlgD                                       | 1327   | 1329   | 1377   | 1483   | 775    | 774    | 798    | 798    | 489   | 536   | 464   | 495   |
| K02390 flagellar hook protein FlgE                                                              | 1404   | 1372   | 1330   | 1360   | 885    | 884    | 799    | 842    | 770   | 853   | 714   | 795   |
| K02391 flagellar basal-body rod protein FlgF                                                    | 1290   | 1304   | 1331   | 1290   | 940    | 881    | 818    | 905    | 359   | 381   | 388   | 404   |
| K02392 flagellar basal-body rod protein FlgG                                                    | 1047   | 949    | 1008   | 1009   | 516    | 589    | 514    | 471    | 722   | 899   | 854   | 795   |
| K02393 flagellar L-ring protein precursor FlgH                                                  | 1193   | 1160   | 1230   | 1190   | 816    | 759    | 739    | 798    | 409   | 360   | 374   | 388   |
| K02394 flagellar P-ring protein precursor FlgI                                                  | 289    | 326    | 316    | 340    | 377    | 424    | 341    | 391    | 106   | 93    | 102   | 87    |
| K02396 flagellar hook-associated protein 1 FlgK                                                 | 2307   | 2223   | 2276   | 2288   | 1377   | 1476   | 1344   | 1319   | 1079  | 1208  | 1201  | 1210  |
| K02397 flagellar hook-associated protein 3 FlgL                                                 | 2783   | 2621   | 2716   | 2821   | 1400   | 1502   | 1471   | 1585   | 1263  | 1318  | 1193  | 1233  |
| K02399 flagella synthesis protein FlgN                                                          | 833    | 726    | 726    | 793    | 489    | 495    | 455    | 474    | 243   | 245   | 231   | 231   |
| K02400 flagellar biosynthesis protein FlhA                                                      | 4942   | 4672   | 4684   | 4872   | 2496   | 2614   | 2287   | 2630   | 2674  | 2652  | 2653  | 2788  |
| K02401 flagellar biosynthetic protein FlhB                                                      | 1416   | 1383   | 1498   | 1360   | 813    | 892    | 809    | 840    | 803   | 856   | 815   | 832   |
| K02407 flagellar hook-associated protein 2                                                      | 3135   | 3117   | 3015   | 3159   | 1702   | 1771   | 1691   | 1725   | 1307  | 1386  | 1303  | 1353  |
| K02408 flagellar hook-basal body complex protein FlIE                                           | 703    | 665    | 713    | 627    | 361    | 381    | 368    | 416    | 250   | 241   | 278   | 290   |
| K02409 flagellar M-ring protein FlhF                                                            | 3024   | 3158   | 2875   | 3023   | 1790   | 1962   | 1586   | 1752   | 1258  | 1249  | 1128  | 1173  |
| K02411 flagellar assembly protein FlhH                                                          | 1443   | 1364   | 1227   | 1334   | 813    | 760    | 745    | 851    | 497   | 520   | 491   | 533   |
| K02412 flagellum-specific ATP synthase [EC:7.4.2.8]                                             | 2859   | 2827   | 2609   | 2693   | 1664   | 1647   | 1646   | 1642   | 1368  | 1367  | 1313  | 1294  |
| K02413 flagellar FljI protein                                                                   | 549    | 561    | 543    | 564    | 344    | 346    | 368    | 375    | 201   | 180   | 208   | 214   |
| K02414 flagellar hook-length control protein FlIK                                               | 1874   | 1908   | 1737   | 1940   | 1185   | 1214   | 1196   | 1357   | 580   | 542   | 567   | 585   |
| K02418 flagellar protein FljO/FljZ                                                              | 478    | 477    | 442    | 484    | 342    | 334    | 326    | 311    | 160   | 199   |       |       |

|                                                                                     |        |        |        |        |        |        |        |        |        |        |        |        |
|-------------------------------------------------------------------------------------|--------|--------|--------|--------|--------|--------|--------|--------|--------|--------|--------|--------|
| ko04612 Antigen processing and presentation                                         | 8026   | 8029   | 8184   | 8223   | 11366  | 11368  | 11453  | 11419  | 9422   | 9406   | 9524   | 9662   |
| ko04660 T cell receptor signaling pathway                                           | 0      | 0      | 0      | 0      | 1      | 0      | 0      | 0      | 1      | 0      | 1      | 0      |
| ko04659 Th17 cell differentiation                                                   | 8026   | 8030   | 8183   | 8223   | 11366  | 11368  | 11453  | 11419  | 9422   | 9406   | 9524   | 9661   |
| ko04657 IL-17 signaling pathway                                                     | 8027   | 8029   | 8183   | 8223   | 11366  | 11368  | 11453  | 11419  | 9422   | 9406   | 9524   | 9661   |
| ko04662 B cell receptor signaling pathway                                           | 0      | 0      | 0      | 0      | 0      | 0      | 0      | 0      | 0      | 0      | 1      | 0      |
| ko04664 Fc epsilon RI signaling pathway                                             | 0      | 0      | 0      | 0      | 0      | 1      | 0      | 0      | 1      | 0      | 1      | 0      |
| ko04666 Fc gamma R-mediated phagocytosis                                            | 19     | 18     | 24     | 22     | 76     | 68     | 0      | 0      | 47     | 57     | 70     | 43     |
| ko04670 Leukocyte transendothelial migration                                        | 0      | 0      | 0      | 0      | 1      | 1      | 0      | 0      | 0      | 0      | 0      | 0      |
| ko04662 Chemokine signaling pathway                                                 | 0      | 0      | 0      | 0      | 1      | 0      | 0      | 0      | 0      | 0      | 1      | 0      |
| Endocrine system                                                                    | 85228  | 86103  | 84534  | 84701  | 89535  | 90344  | 90104  | 91208  | 80633  | 79365  | 80025  | 79369  |
| ko04911 Insulin secretion                                                           | 0      | 0      | 0      | 0      | 0      | 1      | 0      | 0      | 0      | 0      | 0      | 0      |
| ko04910 Insulin signaling pathway                                                   | 10000  | 10423  | 10406  | 10170  | 14543  | 14946  | 14744  | 14399  | 14021  | 13968  | 14479  | 13865  |
| K07192 flotillin                                                                    | 895    | 968    | 1003   | 957    | 2053   | 2140   | 2205   | 2095   | 1778   | 1672   | 1812   | 1623   |
| ko04922 Glucagon signaling pathway                                                  | 24570  | 24749  | 24363  | 24073  | 24600  | 25086  | 24727  | 24663  | 26096  | 26245  | 26454  | 25811  |
| ko04923 Regulation of lipolysis in adipocytes                                       | 1      | 0      | 0      | 1      | 0      | 1      | 0      | 1      | 0      | 0      | 0      | 1      |
| ko04920 Adipocytokine signaling pathway                                             | 8806   | 9429   | 9308   | 9114   | 17271  | 16719  | 17607  | 17426  | 13721  | 13107  | 13394  | 13271  |
| ko03320 PPAR signaling pathway                                                      | 36028  | 36345  | 35679  | 35800  | 36219  | 35948  | 36046  | 37037  | 30356  | 29701  | 29415  | 29738  |
| K08770 ubiquitin C                                                                  | 1      | 0      | 0      | 0      | 1      | 0      | 0      | 0      | 0      | 0      | 0      | 0      |
| ko04912 GnRH signaling pathway                                                      | 0      | 0      | 0      | 0      | 1      | 1      | 0      | 0      | 0      | 0      | 2      | 0      |
| ko04915 Estrogen signaling pathway                                                  | 8027   | 8029   | 8184   | 8223   | 11366  | 11368  | 11453  | 11419  | 9422   | 9406   | 9525   | 9662   |
| ko04914 Progesterone-mediated oocyte maturation                                     | 8026   | 8030   | 8184   | 8223   | 11366  | 11368  | 11453  | 11419  | 9422   | 9408   | 9524   | 9661   |
| ko04917 Prolactin signaling pathway                                                 | 1321   | 1413   | 1373   | 1488   | 1030   | 1083   | 983    | 977    | 1529   | 1441   | 1495   | 1511   |
| ko04921 Oxytocin signaling pathway                                                  | 1      | 3      | 3      | 0      | 3      | 7      | 1      | 2      | 5      | 16     | 16     | 12     |
| ko04926 Relaxin signaling pathway                                                   | 0      | 0      | 0      | 0      | 0      | 1      | 0      | 0      | 0      | 0      | 1      | 0      |
| ko04918 Thyroid hormone synthesis                                                   | 6142   | 6104   | 5909   | 5851   | 4383   | 4551   | 4584   | 4660   | 4342   | 4239   | 4219   | 4188   |
| ko04919 Thyroid hormone signaling pathway                                           | 6513   | 6573   | 6100   | 6453   | 3388   | 3541   | 3352   | 3634   | 2144   | 1954   | 1809   | 2070   |
| ko04928 Parathyroid hormone synthesis, secretion and action                         | 0      | 0      | 0      | 0      | 0      | 0      | 2      | 0      | 1      | 5      | 1      | 3      |
| K03626 nascent polypeptide-associated complex subunit alpha                         | 0      | 0      | 0      | 0      | 0      | 1      | 0      | 1      | 4      | 1      | 2      | 1      |
| ko04916 Melanogenesis                                                               | 0      | 0      | 0      | 0      | 0      | 1      | 0      | 0      | 0      | 0      | 0      | 0      |
| ko04614 Renin-angiotensin system                                                    | 1101   | 1213   | 1233   | 1176   | 3977   | 4022   | 4125   | 4042   | 3029   | 2895   | 3260   | 2845   |
| K01322 prolyl oligopeptidase [EC:3.4.21.26]                                         | 1101   | 1208   | 1233   | 1176   | 3977   | 4022   | 4125   | 4042   | 3028   | 2895   | 3257   | 2845   |
| K01392 thimet oligopeptidase [EC:3.4.24.15]                                         | 0      | 0      | 0      | 0      | 0      | 0      | 0      | 0      | 1      | 0      | 0      | 0      |
| K08780 carboxypeptidase A3 [EC:3.4.17.1]                                            | 0      | 5      | 0      | 0      | 0      | 0      | 0      | 0      | 0      | 0      | 3      | 0      |
| ko04925 Aldosterone synthesis and secretion                                         | 0      | 0      | 0      | 0      | 0      | 1      | 0      | 0      | 0      | 0      | 0      | 0      |
| ko04927 Cortisol synthesis and secretion                                            | 0      | 0      | 1      | 1      | 0      | 0      | 0      | 0      | 6      | 4      | 10     | 12     |
| K14349 neutral cholesterol ester hydrolase 1 [EC:3.1.1.-.]                          | 0      | 0      | 1      | 1      | 0      | 0      | 0      | 0      | 6      | 4      | 10     | 12     |
| Circulatory system                                                                  | 3668   | 3691   | 3846   | 3809   | 2174   | 2301   | 2108   | 2052   | 1263   | 1256   | 1169   | 1147   |
| ko04260 Cardiac muscle contraction                                                  | 3668   | 3691   | 3846   | 3809   | 2174   | 2298   | 2108   | 2052   | 1263   | 1256   | 1169   | 1146   |
| ko04261 Adrenergic signaling in cardiomyocytes                                      | 0      | 0      | 2      | 0      | 0      | 3      | 0      | 0      | 0      | 0      | 1      | 1      |
| ko04270 Vascular smooth muscle contraction                                          | 0      | 0      | 0      | 0      | 0      | 3      | 0      | 0      | 0      | 0      | 0      | 1      |
| Digestive system                                                                    | 7127   | 7634   | 7782   | 7664   | 15544  | 15802  | 15992  | 15651  | 12931  | 12646  | 12883  | 12540  |
| ko04970 Salivary secretion                                                          | 0      | 0      | 0      | 0      | 0      | 1      | 0      | 0      | 0      | 0      | 0      | 0      |
| ko04971 Gastric acid secretion                                                      | 0      | 0      | 0      | 0      | 0      | 1      | 0      | 0      | 0      | 0      | 0      | 0      |
| ko04972 Pancreatic secretion                                                        | 0      | 6      | 2      | 2      | 0      | 0      | 0      | 0      | 2      | 1      | 7      | 8      |
| ko04976 Bile secretion                                                              | 12     | 7      | 8      | 10     | 2      | 4      | 6      | 3      | 27     | 29     | 28     | 36     |
| ko04973 Carbohydrate digestion and absorption                                       | 3056   | 3194   | 3262   | 3327   | 4622   | 4866   | 4740   | 4750   | 5104   | 5028   | 5146   | 5167   |
| ko04974 Protein digestion and absorption                                            | 3112   | 3443   | 3550   | 3343   | 10262  | 10368  | 10610  | 10263  | 7405   | 7158   | 7322   | 6934   |
| K01278 dipeptidyl-peptidase 4 [EC:3.4.14.5]                                         | 3112   | 3437   | 3550   | 3343   | 10262  | 10368  | 10609  | 10261  | 7405   | 7158   | 7319   | 6931   |
| K14208 Xaa-Pro aminopeptidase 2 [EC:3.4.11.9]                                       | 0      | 0      | 0      | 0      | 0      | 0      | 0      | 1      | 0      | 0      | 0      | 1      |
| K14210 solute carrier family 3 (neutral and basic amino acid transporter), member 1 | 0      | 0      | 0      | 0      | 0      | 0      | 1      | 1      | 0      | 0      | 0      | 2      |
| K16628 collagen, type VII, alpha                                                    | 0      | 1      | 0      | 0      | 0      | 0      | 0      | 0      | 0      | 0      | 0      | 0      |
| ko04975 Fat digestion and absorption                                                | 0      | 1      | 0      | 2      | 1      | 1      | 2      | 0      | 2      | 2      | 3      | 8      |
| ko04979 Cholesterol metabolism                                                      | 87     | 86     | 95     | 104    | 126    | 97     | 144    | 114    | 116    | 133    | 97     | 118    |
| ko04978 Mineral absorption                                                          | 860    | 903    | 866    | 879    | 531    | 465    | 490    | 521    | 283    | 300    | 296    | 289    |
| K07213 copper chaperone                                                             | 860    | 903    | 866    | 879    | 531    | 465    | 490    | 521    | 283    | 300    | 296    | 289    |
| Excretory system                                                                    | 2043   | 1923   | 2018   | 2096   | 2893   | 3054   | 3289   | 2914   | 3694   | 3538   | 3853   | 3655   |
| ko04962 Vasopressin-regulated water reabsorption                                    | 0      | 0      | 0      | 0      | 0      | 1      | 0      | 0      | 0      | 0      | 0      | 1      |
| K12462 Rho GTP-dissociation inhibitor                                               | 0      | 0      | 0      | 0      | 0      | 1      | 0      | 0      | 0      | 0      | 0      | 0      |
| ko04960 Aldosterone-regulated sodium reabsorption                                   | 0      | 0      | 0      | 0      | 0      | 1      | 0      | 0      | 0      | 1      | 0      | 0      |
| ko04961 Endocrine and other factor-regulated calcium reabsorption                   | 0      | 0      | 0      | 0      | 0      | 1      | 0      | 0      | 0      | 0      | 0      | 0      |
| ko04964 Proximal tubule bicarbonate reclamation                                     | 0      | 0      | 0      | 0      | 0      | 1      | 0      | 0      | 0      | 0      | 0      | 0      |
| ko04966 Collecting duct acid secretion                                              | 2043   | 1923   | 2018   | 2095   | 2893   | 3051   | 3289   | 2914   | 3693   | 3538   | 3853   | 3654   |
| Nervous system                                                                      | 0      | 0      | 0      | 1      | 0      | 1      | 0      | 0      | 0      | 0      | 0      | 0      |
| ko04724 Glutamatergic synapse                                                       | 27075  | 26686  | 26746  | 26510  | 28824  | 28324  | 28853  | 29209  | 22373  | 22202  | 22656  | 22066  |
| ko04727 GABAergic synapse                                                           | 23491  | 22949  | 23048  | 22848  | 24057  | 23576  | 24216  | 24286  | 18930  | 18842  | 19237  | 18793  |
| ko04725 Cholinergic synapse                                                         | 24531  | 24020  | 24134  | 23917  | 27376  | 26908  | 27543  | 27662  | 21506  | 21326  | 21862  | 21312  |
| ko04728 Dopaminergic synapse                                                        | 0      | 0      | 0      | 0      | 0      | 1      | 0      | 0      | 0      | 0      | 0      | 0      |
| ko04726 Serotonergic synapse                                                        | 2541   | 2665   | 2610   | 2588   | 1445   | 1412   | 1307   | 1544   | 864    | 874    | 791    | 750    |
| ko04720 Long-term potentiation                                                      | 2541   | 2665   | 2610   | 2588   | 1445   | 1410   | 1307   | 1544   | 864    | 874    | 791    | 749    |
| ko04720 Long-term depression                                                        | 0      | 0      | 0      | 0      | 0      | 3      | 0      | 0      | 0      | 0      | 0      | 1      |
| ko04730 Long-term depression                                                        | 0      | 0      | 0      | 0      | 0      | 1      | 0      | 0      | 0      | 0      | 0      | 0      |
| ko04723 Retrograde endocannabinoid signaling                                        | 1      | 0      | 2      | 1      | 2      | 4      | 3      | 1      | 2      | 1      | 1      | 4      |
| ko04721 Synaptic vesicle cycle                                                      | 2      | 1      | 0      | 3      | 0      | 1      | 0      | 2      | 0      | 0      | 0      | 0      |
| K05038 solute carrier family 6 (neurotransmitter transporter, glycine) member 5/9   | 2      | 1      | 0      | 2      | 0      | 0      | 0      | 0      | 0      | 0      | 0      | 0      |
| ko04722 Neurotrophin signaling pathway                                              | 0      | 0      | 0      | 1      | 1      | 1      | 0      | 0      | 1      | 1      | 1      | 0      |
| Sensory system                                                                      | 0      | 0      | 0      | 0      | 0      | 3      | 0      | 0      | 0      | 0      | 0      | 1      |
| ko04745 Phototransduction - fly                                                     | 0      | 0      | 0      | 0      | 0      | 1      | 0      | 0      | 0      | 0      | 0      | 0      |
| ko04750 Inflammatory mediator regulation of TRP channels                            | 0      | 0      | 0      | 0      | 0      | 3      | 0      | 0      | 0      | 0      | 0      | 1      |
| Development and regeneration                                                        | 908    | 786    | 838    | 879    | 568    | 573    | 545    | 542    | 537    | 528    | 452    | 557    |
| ko04320 Dorsal-ventral axis formation                                               | 0      | 0      | 0      | 0      | 0      | 0      | 0      | 0      | 0      | 0      | 1      | 0      |
| ko04360 Axon guidance                                                               | 0      | 0      | 0      | 0      | 1      | 1      | 0      | 0      | 0      | 0      | 0      | 0      |
| ko04361 Axon regeneration                                                           | 908    | 786    | 836    | 879    | 567    | 572    | 545    | 542    | 537    | 527    | 451    | 557    |
| ko04380 Osteoclast differentiation                                                  | 0      | 0      | 2      | 0      | 0      | 0      | 0      | 0      | 0      | 0      | 1      | 0      |
| Aging                                                                               | 33006  | 32777  | 33300  | 33166  | 31413  | 31363  | 30776  | 30146  | 30974  | 31053  | 30962  | 30479  |
| ko04211 Longevity regulating pathway                                                | 10220  | 10031  | 9917   | 10187  | 6744   | 6597   | 6583   | 6517   | 6706   | 6656   | 6534   | 6590   |
| ko04212 Longevity regulating pathway - worm                                         | 24384  | 24109  | 24720  | 24458  | 22093  | 22192  | 21304  | 21081  | 21443  | 21743  | 21589  | 21177  |
| ko04213 Longevity regulating pathway - multiple species                             | 18842  | 18699  | 18497  | 18895  | 16064  | 15768  | 16055  | 15582  | 16237  | 15966  | 15905  | 15892  |
| K03695 ATP-dependent Clp protease ATP-binding subunit ClpB                          | 6561   | 6640   | 6785   | 6721   | 8216   | 8134   | 8397   | 7957   | 8426   | 8282   | 8373   | 8226   |
| Environmental adaptation                                                            | 48101  | 48891  | 48185  | 48451  | 50342  | 50325  | 50690  | 51443  | 43711  | 43716  | 42953  | 43764  |
| ko04710 Circadian rhythm                                                            | 0      | 0      | 0      | 0      | 0      | 0      | 0      | 0      | 0      | 0      | 2      | 0      |
| ko04713 Circadian entrainment                                                       | 0      | 0      | 0      | 0      | 0      | 1      | 0      | 0      | 0      | 0      | 0      | 0      |
| ko04714 Thermogenesis                                                               | 17786  | 18246  | 18318  | 18105  | 22356  | 21963  | 22394  | 22413  | 17264  | 16738  | 16719  | 16712  |
| K11450 lysine-specific histone demethylase 1A [EC:1.-.-.-.]                         | 0      | 0      | 0      | 0      | 0      | 0      | 0      | 0      | 0      | 0      | 1      | 0      |
| K18160 NADH dehydrogenase [ubiquinone] 1 alpha subcomplex assembly factor 2         | 0      | 0      | 0      | 0      | 0      | 0      | 0      | 0      | 0      | 0      | 0      | 1      |
| ko04626 Plant-pathogen interaction                                                  | 30315  | 30645  | 29867  | 30346  | 27986  | 28361  | 28296  | 29030  | 26447  | 26978  | 26234  | 27052  |
| K13408 membrane fusion protein                                                      | 716    | 677    | 699    | 736    | 296    | 308    | 270    | 242    | 1111   | 1166   | 1097   | 1167   |
| Human Diseases                                                                      | 433129 | 432509 | 428098 | 432004 | 385339 | 389210 | 379746 | 382930 | 388756 | 390610 | 386542 | 389318 |
| Cancer: overview                                                                    | 58098  | 57711  | 56996  | 57707  | 57992  | 58696  | 58091  | 58929  | 54959  | 53497  | 54153  | 53819  |
| ko05200 Pathways in cancer                                                          | 24479  | 24180  | 23868  | 24491  | 21025  | 20992  | 20510  | 21131  | 18509  | 18069  | 18110  | 18426  |
| ko05202 Transcriptional misregulation in cancer                                     | 1      | 1      | 1      | 1      | 0      | 0      | 0      | 1      | 0      | 2      | 0      | 1      |
| K00069 15-hydroxyprostaglandin dehydrogenase (NAD) [EC:1.1.1.141]                   | 1      | 0      | 0      | 1      | 0      | 0      | 0      | 1      | 0      | 0      | 0      | 0      |
| ko05206 MicroRNAs in cancer                                                         | 4450   | 4428   | 4579   | 4488   | 8528   | 8938   | 9136   | 8783   | 8220   | 7815   | 8123   | 8010   |
| ko05205 Proteoglycans in cancer                                                     | 2269   | 2348   | 2292   | 2492   | 3098   | 3100   | 3018   | 3176   | 2862   | 2799   | 2860   | 2743   |
| ko05204 Chemical carcinogenesis                                                     | 10340  | 10167  | 9884   | 10361  | 6013   | 5970   | 5699   | 5945   | 6581   | 6308   | 6186   | 6437   |
| ko05203 Viral carcinogenesis                                                        | 7147   | 7132   | 7138   | 6837   | 6773   | 6674   | 6742   | 6952   | 7213   | 6987   | 7129   | 6912   |
| K11407 histone deacetylase 6 [EC:3.5.1.98]                                          | 0      | 0      | 0      | 0      | 0      | 0      | 0      | 0      | 2      | 0      | 0      | 0      |
| K15979 staphylococcal nuclease domain-containing protein 1                          | 0      | 0      | 2      | 0      | 0      | 0      | 0      | 0      | 0      | 0      | 0      | 0      |
| ko05230 Central carbon metabolism in cancer                                         | 25119  | 24949  | 24698  | 24529  | 25968  | 26445  | 26612  | 26688  | 25725  | 25043  | 25647  | 24969  |
| ko05231 Choline metabolism in cancer                                                | 929    | 804    | 860    | 901    | 645    | 647    | 550    | 544    | 593    | 593    | 526    | 611    |
| ko05235 PD-L1 expression and PD-1 checkpoint pathway in cancer                      | 0      | 1      |        |        |        |        |        |        |        |        |        |        |

|                                                                                                       |        |        |        |        |        |        |        |        |        |        |        |        |
|-------------------------------------------------------------------------------------------------------|--------|--------|--------|--------|--------|--------|--------|--------|--------|--------|--------|--------|
| ko05213 Endometrial cancer                                                                            | 0      | 0      | 0      | 0      | 0      | 0      | 0      | 0      | 1      | 0      | 1      | 0      |
| ko05224 Breast cancer                                                                                 | 0      | 2      | 0      | 0      | 0      | 0      | 0      | 0      | 0      | 0      | 1      | 0      |
| ko05222 Small cell lung cancer                                                                        | 536    | 446    | 470    | 493    | 285    | 267    | 263    | 266    | 206    | 158    | 146    | 142    |
| ko05223 Non-small cell lung cancer                                                                    | 0      | 1      | 0      | 0      | 0      | 1      | 0      | 0      | 1      | 0      | 1      | 0      |
| Immune disease                                                                                        | 2829   | 2939   | 2985   | 3050   | 2582   | 2557   | 2683   | 2528   | 3418   | 3756   | 3780   | 3630   |
| ko05323 Rheumatoid arthritis                                                                          | 0      | 0      | 2      | 1      | 0      | 1      | 0      | 0      | 0      | 1      | 0      | 0      |
| ko05340 Primary immunodeficiency                                                                      | 2829   | 2939   | 2983   | 3049   | 2582   | 2556   | 2683   | 2528   | 3418   | 3755   | 3780   | 3630   |
| Neurodegenerative disease                                                                             | 21284  | 21341  | 21199  | 21477  | 15092  | 15136  | 14898  | 14720  | 13950  | 14007  | 13605  | 13904  |
| ko05010 Alzheimer disease                                                                             | 10716  | 10903  | 10958  | 10933  | 8115   | 8302   | 8068   | 7943   | 6715   | 6795   | 6579   | 6748   |
| ko05012 Parkinson disease                                                                             | 4209   | 4144   | 4327   | 4309   | 2465   | 2573   | 2378   | 2319   | 1484   | 1422   | 1334   | 1298   |
| ko05014 Amyotrophic lateral sclerosis (ALS)                                                           | 8059   | 7850   | 7802   | 8040   | 4462   | 4260   | 4284   | 4370   | 4856   | 4793   | 4588   | 4706   |
| K04575 amyotrophic lateral sclerosis 2 protein                                                        | 1      | 0      | 0      | 0      | 0      | 0      | 0      | 0      | 0      | 0      | 0      | 0      |
| ko05016 Huntington disease                                                                            | 7601   | 7579   | 7554   | 7663   | 5490   | 5645   | 5425   | 5252   | 4589   | 4546   | 4403   | 4453   |
| ko05020 Prion diseases                                                                                | 347    | 404    | 322    | 357    | 229    | 235    | 244    | 260    | 524    | 551    | 489    | 563    |
| Substance dependence                                                                                  | 2541   | 2665   | 2610   | 2588   | 1445   | 1412   | 1307   | 1544   | 866    | 874    | 792    | 750    |
| ko05030 Cocaine addiction                                                                             | 2541   | 2665   | 2610   | 2588   | 1445   | 1409   | 1307   | 1544   | 864    | 874    | 791    | 749    |
| ko05031 Amphetamine addiction                                                                         | 2541   | 2665   | 2610   | 2588   | 1445   | 1412   | 1307   | 1544   | 864    | 874    | 791    | 750    |
| ko05032 Morphine addiction                                                                            | 0      | 0      | 0      | 0      | 0      | 1      | 0      | 0      | 0      | 0      | 0      | 0      |
| ko05034 Alcoholism                                                                                    | 2541   | 2665   | 2610   | 2588   | 1445   | 1411   | 1307   | 1544   | 866    | 874    | 792    | 750    |
| Cardiovascular disease                                                                                | 25987  | 26132  | 26042  | 26290  | 26068  | 25658  | 25621  | 26356  | 23567  | 23257  | 23178  | 23344  |
| ko05418 Fluid shear stress and atherosclerosis                                                        | 25451  | 25687  | 25570  | 25797  | 25783  | 25391  | 25358  | 26090  | 23361  | 23099  | 23029  | 23202  |
| ko05410 Hypertrophic cardiomyopathy (HCM)                                                             | 0      | 0      | 2      | 0      | 0      | 0      | 0      | 0      | 0      | 0      | 3      | 0      |
| ko05412 Arrhythmic right ventricular cardiomyopathy (ARVC)                                            | 0      | 0      | 2      | 0      | 0      | 0      | 0      | 0      | 0      | 0      | 1      | 0      |
| ko05414 Dilated cardiomyopathy (DCM)                                                                  | 0      | 0      | 2      | 0      | 0      | 0      | 0      | 0      | 0      | 0      | 1      | 0      |
| ko05416 Viral myocarditis                                                                             | 536    | 445    | 470    | 493    | 285    | 267    | 263    | 266    | 206    | 158    | 146    | 142    |
| Endocrine and metabolic disease                                                                       | 36409  | 36823  | 36940  | 36118  | 39470  | 39773  | 38709  | 38709  | 35804  | 35918  | 36416  | 35662  |
| ko04930 Type II diabetes mellitus                                                                     | 7811   | 7857   | 7847   | 7535   | 9322   | 9295   | 9412   | 9660   | 9167   | 8776   | 9166   | 8828   |
| ko04940 Type I diabetes mellitus                                                                      | 5297   | 5240   | 5561   | 5171   | 8431   | 8576   | 8015   | 8013   | 7589   | 7551   | 7731   | 7408   |
| ko04932 Non-alcoholic fatty liver disease (NAFLD)                                                     | 4204   | 4136   | 4314   | 4303   | 2460   | 2567   | 2373   | 2318   | 1474   | 1415   | 1317   | 1295   |
| ko04931 Insulin resistance                                                                            | 13929  | 14500  | 14337  | 14229  | 16139  | 16120  | 15997  | 15669  | 15085  | 15771  | 15836  | 15682  |
| ko04933 AGE-RAGE signaling pathway in diabetic complications                                          | 1      | 0      | 1      | 0      | 1      | 1      | 0      | 1      | 3      | 0      | 0      | 3      |
| ko04934 Cushing syndrome                                                                              | 5167   | 5091   | 4880   | 4880   | 3118   | 3214   | 2912   | 3048   | 2486   | 2405   | 2368   | 2446   |
| Infectious disease: bacterial                                                                         | 119846 | 119132 | 117207 | 118561 | 97186  | 98763  | 93431  | 94477  | 97836  | 98567  | 97925  | 99311  |
| ko05110 Vibrio cholerae infection                                                                     | 2165   | 2130   | 2117   | 2034   | 1324   | 1294   | 1182   | 1336   | 631    | 667    | 615    | 599    |
| K10954 zona occludens toxin                                                                           | 2165   | 2130   | 2117   | 2033   | 1324   | 1292   | 1182   | 1336   | 630    | 667    | 615    | 599    |
| ko05120 Epithelial cell signaling in Helicobacter pylori infection                                    | 11809  | 11476  | 11592  | 11615  | 11994  | 12219  | 12309  | 11842  | 14163  | 14596  | 14320  | 14570  |
| K03191 acid-activated urea channel                                                                    | 0      | 0      | 2      | 0      | 0      | 0      | 0      | 1      | 1      | 0      | 2      | 1      |
| K08303 putative protease [EC:3.4.-.]                                                                  | 7471   | 7308   | 7728   | 7446   | 9980   | 10396  | 10485  | 9874   | 10527  | 10825  | 10809  | 10761  |
| ko05130 Pathogenic Escherichia coli infection                                                         | 0      | 0      | 0      | 0      | 1      | 1      | 0      | 0      | 0      | 0      | 0      | 0      |
| ko05132 Salmonella infection                                                                          | 9131   | 9041   | 9116   | 9238   | 10716  | 11184  | 11068  | 10743  | 10668  | 10515  | 10636  | 10673  |
| K05916 nitric oxide dioxygenase [EC:1.14.12.17]                                                       | 2505   | 2462   | 2425   | 2496   | 1545   | 1580   | 1450   | 1563   | 1474   | 1608   | 1521   | 1602   |
| K12264 anaerobic nitric oxide reductase flavorubredoxin                                               | 996    | 911    | 928    | 945    | 594    | 705    | 639    | 569    | 1269   | 1263   | 1201   | 1319   |
| K12265 nitric oxide reductase FliD-NAD(+) reductase [EC:1.18.1.-]                                     | 697    | 748    | 698    | 748    | 500    | 529    | 516    | 466    | 995    | 926    | 884    | 963    |
| K12266 anaerobic nitric oxide reductase transcription regulator                                       | 1898   | 1817   | 1883   | 1921   | 1113   | 1245   | 1096   | 1227   | 1595   | 1583   | 1539   | 1613   |
| K13771 Rrf2 family transcriptional regulator, nitric oxide-sensitive transcriptional repressor        | 311    | 298    | 248    | 276    | 208    | 230    | 226    | 247    | 414    | 385    | 383    | 441    |
| ko05131 Shigellosis                                                                                   | 0      | 0      | 0      | 0      | 1      | 1      | 0      | 0      | 7      | 6      | 3      | 16     |
| K11011 enterotoxin Set1A                                                                              | 0      | 0      | 0      | 0      | 0      | 1      | 0      | 0      | 6      | 6      | 3      | 15     |
| K11012 enterotoxin Set1B                                                                              | 0      | 0      | 0      | 0      | 0      | 0      | 0      | 0      | 1      | 0      | 0      | 1      |
| ko05135 Yersinia infection                                                                            | 1736   | 1863   | 1731   | 1773   | 1145   | 1101   | 899    | 1005   | 1011   | 1007   | 965    | 969    |
| K13735 adhesion/invasion                                                                              | 20     | 26     | 22     | 25     | 112    | 133    | 156    | 129    | 418    | 442    | 407    | 435    |
| K23475 translocator                                                                                   | 1062   | 1181   | 1060   | 1081   | 629    | 560    | 436    | 543    | 361    | 301    | 317    | 307    |
| K23476 translocator                                                                                   | 635    | 638    | 625    | 644    | 328    | 341    | 307    | 333    | 185    | 206    | 172    | 184    |
| ko05133 Pertussis                                                                                     | 61860  | 61731  | 59032  | 60500  | 37204  | 37618  | 34012  | 35350  | 40093  | 39986  | 39353  | 41042  |
| K07326 hemolysin activation/secretion protein                                                         | 4645   | 4473   | 4114   | 4386   | 2414   | 2311   | 2314   | 2582   | 1429   | 1361   | 1346   | 1379   |
| K07345 major type 1 subunit fimbria (pilin)                                                           | 3088   | 3162   | 3141   | 3209   | 1823   | 1884   | 1741   | 1802   | 3340   | 3214   | 3111   | 3378   |
| K07347 outer membrane usher protein                                                                   | 21757  | 21819  | 20940  | 21618  | 11494  | 11469  | 11072  | 11356  | 17377  | 17890  | 17470  | 18304  |
| K07389 cytolysin-activating lysine-acetyltransferase [EC:2.3.1.-]                                     | 12     | 16     | 23     | 22     | 3      | 2      | 1      | 3      | 49     | 67     | 56     | 85     |
| K15125 filamentous hemagglutinin                                                                      | 12530  | 12223  | 11243  | 11692  | 6340   | 6318   | 3629   | 4209   | 4250   | 3865   | 3819   | 3969   |
| ko05134 Legionellosis                                                                                 | 16792  | 16528  | 16951  | 17054  | 19206  | 19665  | 19000  | 19207  | 17522  | 17716  | 17866  | 17391  |
| K03596 GTP-binding protein LepA                                                                       | 5434   | 5432   | 5318   | 5588   | 5745   | 5832   | 5734   | 6005   | 5719   | 5834   | 5837   | 5837   |
| K07874 Ras-related protein Rab-1A                                                                     | 0      | 0      | 1      | 0      | 0      | 0      | 0      | 0      | 0      | 0      | 0      | 0      |
| ko05150 Staphylococcus aureus infection                                                               | 5693   | 5531   | 5629   | 5534   | 3697   | 3689   | 3404   | 3453   | 2345   | 2470   | 2361   | 2544   |
| K11041 exfoliative toxin A/B                                                                          | 123    | 129    | 131    | 134    | 33     | 39     | 30     | 24     | 128    | 148    | 122    | 157    |
| ko05152 Tuberculosis                                                                                  | 16444  | 16376  | 16955  | 16420  | 18304  | 18552  | 17661  | 17540  | 17026  | 17283  | 17418  | 16872  |
| ko05100 Bacterial invasion of epithelial cells                                                        | 163    | 176    | 155    | 156    | 151    | 171    | 179    | 155    | 516    | 607    | 553    | 623    |
| K13730 internalin A                                                                                   | 143    | 150    | 133    | 131    | 38     | 38     | 23     | 26     | 98     | 165    | 146    | 188    |
| Infectious disease: viral                                                                             | 7800   | 7696   | 7715   | 7465   | 7242   | 7093   | 7209   | 7385   | 7570   | 7323   | 7407   | 7205   |
| ko05166 Human T-cell leukemia virus 1 infection                                                       | 87     | 92     | 95     | 103    | 128    | 97     | 144    | 115    | 113    | 133    | 92     | 109    |
| K08874 transformation/translation domain-associated protein                                           | 0      | 0      | 0      | 0      | 0      | 0      | 0      | 0      | 0      | 0      | 2      | 0      |
| K11304 histone acetyltransferase HTATIP [EC:2.3.1.48]                                                 | 0      | 2      | 0      | 0      | 0      | 0      | 0      | 0      | 0      | 0      | 0      | 0      |
| ko05170 Human immunodeficiency virus 1 infection                                                      | 536    | 446    | 470    | 494    | 285    | 268    | 263    | 266    | 206    | 159    | 146    | 142    |
| ko05162 Measles                                                                                       | 536    | 446    | 471    | 495    | 285    | 268    | 265    | 266    | 210    | 161    | 146    | 147    |
| ko05164 Influenza A                                                                                   | 557    | 464    | 482    | 520    | 346    | 319    | 321    | 315    | 252    | 209    | 183    | 182    |
| ko05161 Hepatitis B                                                                                   | 537    | 445    | 470    | 495    | 286    | 268    | 263    | 267    | 208    | 164    | 150    | 146    |
| ko05160 Hepatitis C                                                                                   | 536    | 446    | 470    | 494    | 285    | 268    | 265    | 266    | 210    | 160    | 147    | 146    |
| ko05168 Herpes simplex virus 1 infection                                                              | 544    | 455    | 475    | 499    | 286    | 270    | 267    | 268    | 212    | 165    | 151    | 152    |
| K09228 KRA8 domain-containing zinc finger protein                                                     | 0      | 0      | 0      | 0      | 0      | 0      | 0      | 0      | 0      | 0      | 1      | 0      |
| ko05163 Human cytomegalovirus infection                                                               | 536    | 447    | 470    | 493    | 285    | 268    | 263    | 266    | 206    | 158    | 147    | 142    |
| ko05167 Kaposi sarcoma-associated herpesvirus infection                                               | 536    | 447    | 470    | 493    | 285    | 267    | 263    | 266    | 206    | 158    | 146    | 142    |
| ko05169 Epstein-Barr virus infection                                                                  | 536    | 447    | 470    | 494    | 285    | 267    | 263    | 266    | 207    | 159    | 147    | 142    |
| ko05165 Human papillomavirus infection                                                                | 7147   | 7133   | 7132   | 6837   | 6768   | 6675   | 6742   | 6952   | 7203   | 6975   | 7126   | 6906   |
| K12236 transcriptional repressor NF-X1                                                                | 0      | 0      | 0      | 0      | 1      | 0      | 0      | 0      | 0      | 0      | 0      | 0      |
| Infectious disease: parasitic                                                                         | 5030   | 4709   | 4864   | 4918   | 2754   | 2895   | 2836   | 2946   | 3399   | 3389   | 3225   | 3430   |
| ko05146 Amoebiasis                                                                                    | 340    | 367    | 352    | 346    | 212    | 226    | 250    | 212    | 661    | 651    | 628    | 681    |
| K13963 serpin B                                                                                       | 10     | 16     | 9      | 9      | 5      | 3      | 0      | 3      | 21     | 25     | 25     | 28     |
| ko05145 Toxoplasmosis                                                                                 | 536    | 445    | 471    | 494    | 285    | 267    | 263    | 266    | 207    | 159    | 146    | 143    |
| ko05140 Leishmaniasis                                                                                 | 0      | 0      | 0      | 1      | 0      | 0      | 0      | 0      | 0      | 1      | 0      | 0      |
| ko05142 Chagas disease (American trypanosomiasis)                                                     | 3862   | 3649   | 3788   | 3823   | 2109   | 2269   | 2185   | 2340   | 2426   | 2493   | 2357   | 2502   |
| K01354 oligopeptidase B [EC:3.4.21.83]                                                                | 3861   | 3649   | 3787   | 3822   | 2109   | 2269   | 2185   | 2339   | 2423   | 2492   | 2357   | 2499   |
| ko05143 African trypanosomiasis                                                                       | 4153   | 3897   | 4040   | 4078   | 2257   | 2403   | 2323   | 2467   | 2528   | 2579   | 2451   | 2603   |
| K14475 inhibitor of cysteine peptidase                                                                | 292    | 248    | 253    | 256    | 148    | 133    | 138    | 128    | 104    | 87     | 94     | 104    |
| Drug resistance: antimicrobial                                                                        | 184012 | 183965 | 182503 | 184152 | 164647 | 166555 | 163321 | 164537 | 171064 | 173124 | 169995 | 171510 |
| ko01501 beta-lactam resistance                                                                        | 102035 | 102455 | 102559 | 102669 | 94665  | 95957  | 94437  | 94402  | 97066  | 98109  | 96493  | 96791  |
| K02171 BlaI family transcriptional regulator, penicillinase repressor                                 | 97     | 106    | 78     | 86     | 18     | 30     | 35     | 22     | 109    | 98     | 93     | 101    |
| K02172 bla regulator protein blaR1                                                                    | 591    | 533    | 503    | 572    | 135    | 133    | 131    | 124    | 538    | 651    | 579    | 630    |
| K03585 membrane fusion protein, multidrug efflux system                                               | 8515   | 8742   | 9237   | 8856   | 13268  | 13321  | 12784  | 12883  | 10656  | 10421  | 10443  | 10230  |
| K08218 MFS transporter, PAT family, beta-lactamase induction signal transducer AmpG                   | 5180   | 5314   | 5286   | 5070   | 7425   | 7460   | 7782   | 7326   | 5981   | 5833   | 5979   | 5694   |
| K17837 metallo-beta-lactamase class B [EC:3.5.2.6]                                                    | 291    | 311    | 328    | 278    | 748    | 675    | 720    | 706    | 470    | 414    | 425    | 420    |
| K17838 beta-lactamase class D [EC:3.5.2.6]                                                            | 0      | 0      | 0      | 0      | 1      | 0      | 0      | 1      | 0      | 0      | 0      | 0      |
| K17850 LysR family transcriptional regulator, regulator of gene expression of beta-lactamase          | 1319   | 1327   | 1274   | 1225   | 808    | 690    | 701    | 754    | 420    | 403    | 406    | 380    |
| K18129 TetR/AcrR family transcriptional regulator, mexXY operon repressor                             | 847    | 798    | 781    | 835    | 450    | 413    | 417    | 433    | 256    | 255    | 216    | 250    |
| K18130 TetR/AcrR family transcriptional regulator, transcriptional repressor NalC                     | 1008   | 1018   | 970    | 979    | 566    | 526    | 469    | 577    | 295    | 272    | 281    | 318    |
| K18131 MarR family transcriptional regulator, repressor of the mexAB-oprM multidrug resistance operon | 596    | 569    | 578    | 600    | 318    | 330    | 324    | 322    | 208    | 193    | 18     |        |

|                                                                                                           |         |         |         |         |         |         |         |         |         |         |         |         |
|-----------------------------------------------------------------------------------------------------------|---------|---------|---------|---------|---------|---------|---------|---------|---------|---------|---------|---------|
| ko01503 Cationic antimicrobial peptide (CAMP) resistance                                                  | 88684   | 88362   | 87392   | 88438   | 78253   | 78507   | 76377   | 78495   | 77924   | 78165   | 76991   | 78186   |
| K01406 serylalys [EC:3.4.24.40]                                                                           | 1684    | 1682    | 1566    | 1582    | 973     | 863     | 896     | 888     | 576     | 534     | 516     | 536     |
| K01448 N-acetylmuramoyl-L-alanine amidase [EC:3.5.1.28]                                                   | 8921    | 8949    | 8994    | 8960    | 9021    | 9132    | 8962    | 9053    | 8809    | 8877    | 8693    | 8769    |
| K03673 thiol:disulfide interchange protein DsbA                                                           | 1492    | 1669    | 1702    | 1634    | 1083    | 1021    | 1004    | 1129    | 1373    | 1488    | 1472    | 1500    |
| K06079 copper homeostasis protein (lipoprotein)                                                           | 492     | 465     | 477     | 445     | 337     | 397     | 331     | 424     | 519     | 638     | 558     | 569     |
| K12962 undecaprenyl phosphate-alpha-L-ara4N flippase subunit ArnE                                         | 792     | 702     | 674     | 779     | 443     | 404     | 418     | 448     | 462     | 424     | 408     | 459     |
| K12963 undecaprenyl phosphate-alpha-L-ara4N flippase subunit ArnF                                         | 466     | 423     | 344     | 453     | 297     | 276     | 262     | 299     | 374     | 387     | 397     | 404     |
| K13632 AraC family transcriptional regulator, mar-sox-rob regulon activator                               | 194     | 175     | 199     | 177     | 163     | 146     | 125     | 155     | 289     | 301     | 264     | 253     |
| K19236 L,D-transpeptidase YnfS                                                                            | 522     | 519     | 506     | 488     | 311     | 389     | 396     | 373     | 811     | 723     | 734     | 739     |
| K19238 signal transduction protein PmrD                                                                   | 173     | 113     | 168     | 149     | 101     | 101     | 110     | 94      | 213     | 217     | 225     | 176     |
| Drug resistance: antineoplastic                                                                           | 39097   | 38159   | 37889   | 38521   | 32773   | 32581   | 32259   | 32942   | 31499   | 30544   | 30126   | 30545   |
| ko01521 EGFR tyrosine kinase inhibitor resistance                                                         | 2       | 1       | 0       | 0       | 0       | 2       | 0       | 0       | 0       | 4       | 1       | 4       |
| ko01524 Platinum drug resistance                                                                          | 17388   | 16450   | 16525   | 17194   | 9668    | 9634    | 9148    | 9739    | 10322   | 10424   | 10019   | 10432   |
| ko01523 Antifolate resistance                                                                             | 21707   | 21708   | 21364   | 21327   | 23105   | 22946   | 23111   | 23203   | 21178   | 20117   | 20106   | 20109   |
| ko01522 Endocrine resistance                                                                              | 0       | 1       | 0       | 0       | 0       | 0       | 0       | 0       | 0       | 0       | 1       | 0       |
| Brite Hierarchies                                                                                         | 5418349 | 5398942 | 5339635 | 5401726 | 4741005 | 4780733 | 4715107 | 4749119 | 4925928 | 4956758 | 4890240 | 4953017 |
| Protein families: metabolism                                                                              | 1096552 | 1092366 | 1082616 | 1095412 | 995368  | 1004854 | 990434  | 993473  | 995825  | 1000562 | 989552  | 999807  |
| ko01001 Protein kinases                                                                                   | 152919  | 150861  | 146140  | 150476  | 94896   | 96148   | 93043   | 95912   | 109312  | 110809  | 107760  | 111659  |
| K00936 two-component system, sensor histidine kinase PtdtaS [EC:2.7.13.3]                                 | 132     | 137     | 125     | 126     | 37      | 31      | 35      | 26      | 168     | 201     | 183     | 176     |
| K02476 two-component system, CtrB family, sensor kinase [EC:2.7.13.3]                                     | 87      | 77      | 71      | 74      | 12      | 20      | 11      | 14      | 93      | 101     | 81      | 85      |
| K02478 two-component system, LytR family, sensor kinase [EC:2.7.13.3]                                     | 2011    | 1853    | 1857    | 1941    | 1283    | 1324    | 1340    | 1293    | 2767    | 2768    | 2596    | 2731    |
| K02480 two-component system, NarL family, sensor kinase [EC:2.7.13.3]                                     | 3       | 0       | 3       | 3       | 0       | 3       | 0       | 1       | 1       | 11      | 2       | 2       |
| K02482 two-component system, NtrC family, sensor kinase [EC:2.7.13.3]                                     | 1771    | 1853    | 1886    | 1852    | 994     | 1065    | 983     | 1013    | 621     | 611     | 660     | 649     |
| K02484 two-component system, OmpR family, sensor kinase [EC:2.7.13.3]                                     | 1004    | 1054    | 1149    | 1077    | 3603    | 3500    | 3623    | 3438    | 2652    | 2681    | 2773    | 2671    |
| K02486 two-component system, sensor kinase [EC:2.7.13.3]                                                  | 3       | 2       | 0       | 1       | 0       | 0       | 0       | 0       | 0       | 0       | 1       | 1       |
| K04757 serine/threonine-protein kinase RsbW [EC:2.7.11.1]                                                 | 136     | 106     | 136     | 149     | 39      | 43      | 57      | 36      | 242     | 251     | 261     | 270     |
| K07154 serine/threonine-protein kinase HspA [EC:2.7.11.1]                                                 | 1927    | 2100    | 2118    | 2082    | 5065    | 5138    | 5352    | 5097    | 4650    | 4574    | 4782    | 4675    |
| K08857 NIMA (never in mitosis gene a)-related kinase 1/4/5 [EC:2.7.11.1]                                  | 0       | 0       | 0       | 0       | 0       | 1       | 0       | 0       | 0       | 0       | 0       | 0       |
| K08869 aarF domain-containing kinase                                                                      | 0       | 0       | 0       | 0       | 1       | 0       | 0       | 0       | 0       | 0       | 0       | 0       |
| K08884 serine/threonine protein kinase, bacterial [EC:2.7.11.1]                                           | 49      | 38      | 46      | 39      | 14      | 9       | 7       | 10      | 123     | 105     | 114     | 149     |
| K11527 two-component system, sensor histidine kinase and response regulator [EC:2.7.13.3]                 | 688     | 736     | 834     | 687     | 2331    | 2388    | 2448    | 2186    | 1672    | 1561    | 1782    | 1513    |
| K12132 eukaryotic-like serine/threonine-protein kinase [EC:2.7.11.1]                                      | 1372    | 1307    | 1454    | 1366    | 732     | 856     | 773     | 668     | 1051    | 1149    | 1051    | 1170    |
| K15904 bifunctional N6-L-threonylcarbamoyladenine synthase / protein kinase Bud32 [EC:2.3.1.234 2.7.11.1] | 0       | 0       | 5       | 1       | 2       | 4       | 5       | 2       | 3       | 3       | 8       | 10      |
| K16309 serine/threonine-protein kinase greatwall [EC:2.7.11.1]                                            | 0       | 0       | 2       | 0       | 0       | 0       | 0       | 0       | 4       | 2       | 2       | 1       |
| K17752 serine/threonine-protein kinase RsbT [EC:2.7.11.1]                                                 | 1       | 0       | 0       | 0       | 0       | 0       | 0       | 0       | 0       | 0       | 0       | 0       |
| K19852 serine/threonine protein kinase KIN1/2 [EC:2.7.11.1]                                               | 0       | 0       | 0       | 0       | 0       | 1       | 0       | 0       | 0       | 0       | 0       | 0       |
| ko01009 Protein phosphatases and associated proteins                                                      | 15991   | 16129   | 16357   | 16336   | 22340   | 22960   | 22565   | 22176   | 20202   | 20375   | 20321   | 20436   |
| K15732 RNA polymerase II subunit A C-terminal domain phosphatase [EC:3.1.3.16]                            | 0       | 0       | 0       | 0       | 0       | 0       | 0       | 0       | 0       | 0       | 1       | 0       |
| K17623 pseudouridine 5'-phosphatase [EC:3.1.3.96]                                                         | 0       | 0       | 2       | 0       | 0       | 1       | 0       | 0       | 2       | 3       | 3       | 1       |
| K20074 PPM family protein phosphatase [EC:3.1.3.16]                                                       | 643     | 549     | 621     | 629     | 366     | 376     | 383     | 302     | 419     | 523     | 432     | 464     |
| K21814 serine/threonine-protein phosphatase CPPE01 [EC:3.1.3.16]                                          | 3       | 1       | 1       | 0       | 1       | 0       | 0       | 2       | 0       | 0       | 3       | 0       |
| ko01002 Peptidases                                                                                        | 281229  | 280455  | 280046  | 282141  | 280291  | 281848  | 280342  | 278403  | 278351  | 278636  | 277235  | 277455  |
| K00683 glutamyl-peptide cyclotransferase [EC:3.2.2.5]                                                     | 1       | 0       | 0       | 0       | 0       | 0       | 0       | 0       | 0       | 0       | 0       | 0       |
| K01258 tripeptide aminopeptidase [EC:3.4.11.4]                                                            | 2499    | 2497    | 2450    | 2486    | 3425    | 3429    | 3393    | 3298    | 3409    | 3442    | 3514    | 3493    |
| K01261 glutamyl aminopeptidase [EC:3.4.11.7]                                                              | 70      | 76      | 74      | 70      | 26      | 25      | 16      | 20      | 73      | 108     | 87      | 61      |
| K01262 Xaa-Pro aminopeptidase [EC:3.4.11.9]                                                               | 6820    | 7053    | 7095    | 7041    | 10081   | 10301   | 10219   | 10033   | 8131    | 8448    | 8328    | 8038    |
| K01265 methionyl aminopeptidase [EC:3.4.11.18]                                                            | 4600    | 4762    | 4781    | 5020    | 5587    | 5587    | 5539    | 5544    | 5322    | 5500    | 5452    | 5382    |
| K01266 D-aminopeptidase [EC:3.4.11.19]                                                                    | 2205    | 2118    | 2051    | 2071    | 941     | 852     | 815     | 988     | 984     | 928     | 953     | 1052    |
| K01267 aspartyl aminopeptidase [EC:3.4.11.21]                                                             | 2173    | 2142    | 2113    | 2248    | 999     | 919     | 928     | 955     | 1107    | 1066    | 1151    | 1042    |
| K01268 aminopeptidase I [EC:3.4.11.22]                                                                    | 0       | 0       | 2       | 0       | 0       | 0       | 0       | 0       | 0       | 0       | 0       | 0       |
| K01271 Xaa-Pro dipeptidase [EC:3.4.13.9]                                                                  | 1815    | 1787    | 1660    | 1755    | 974     | 984     | 1030    | 909     | 1597    | 1885    | 1646    | 1640    |
| K01273 membrane dipeptidase [EC:3.4.13.19]                                                                | 2581    | 2349    | 2467    | 2544    | 1111    | 1233    | 1118    | 1135    | 1729    | 1838    | 1638    | 1805    |
| K01277 dipeptidyl-peptidase III [EC:3.4.14.4]                                                             | 1280    | 1431    | 1481    | 1341    | 4377    | 4244    | 4422    | 4242    | 3024    | 2818    | 3128    | 2955    |
| K01281 X-Pro dipeptidyl-peptidase [EC:3.4.14.11]                                                          | 4       | 2       | 2       | 5       | 3       | 12      | 3       | 3       | 4       | 2       | 5       | 3       |
| K01284 peptidyl-dipeptidase Dcp [EC:3.4.15.5]                                                             | 3812    | 4056    | 4237    | 4133    | 10238   | 9931    | 10208   | 10020   | 8067    | 7774    | 7922    | 7596    |
| K01293 Gly-Xaa carboxypeptidase [EC:3.4.17.4]                                                             | 0       | 0       | 0       | 0       | 2       | 0       | 0       | 1       | 2       | 2       | 2       | 2       |
| K01295 glutamate carboxypeptidase [EC:3.4.17.11]                                                          | 2183    | 2282    | 2121    | 2304    | 1588    | 1468    | 1385    | 1435    | 978     | 952     | 870     | 960     |
| K01297 muramoyltetrapeptide carboxypeptidase [EC:3.4.17.13]                                               | 2724    | 2711    | 2622    | 2706    | 3036    | 3001    | 2891    | 2989    | 2721    | 2585    | 2753    | 2657    |
| K01299 carboxypeptidase Yaa [EC:3.4.17.19]                                                                | 1355    | 1364    | 1301    | 1289    | 580     | 646     | 640     | 610     | 1509    | 1579    | 1616    | 1653    |
| K01303 acylaminosucyl-peptidase [EC:3.4.19.1]                                                             | 3       | 3       | 2       | 1       | 0       | 0       | 0       | 0       | 3       | 3       | 3       | 3       |
| K01304 pyroglutamyl-peptidase [EC:3.4.19.3]                                                               | 325     | 303     | 308     | 312     | 109     | 103     | 133     | 122     | 611     | 637     | 554     | 630     |
| K01305 beta-aspartyl-dipeptidase [metallo-type] [EC:3.4.19.-]                                             | 205     | 201     | 220     | 171     | 194     | 211     | 231     | 214     | 332     | 376     | 374     | 358     |
| K01308 g-D-glutamyl-meso-diaminopimelate peptidase [EC:3.4.19.11]                                         | 192     | 158     | 178     | 175     | 26      | 27      | 23      | 22      | 146     | 191     | 171     | 177     |
| K01337 lysyl endopeptidase [EC:3.4.21.50]                                                                 | 2300    | 2223    | 1934    | 2176    | 1256    | 1150    | 1180    | 1302    | 761     | 693     | 643     | 676     |
| K01342 subtilisin [EC:3.4.21.62]                                                                          | 0       | 0       | 0       | 1       | 2       | 1       | 1       | 2       | 3       | 2       | 0       | 0       |
| K01355 omptin [EC:3.4.23.49]                                                                              | 7       | 5       | 3       | 2       | 3       | 0       | 12      | 0       | 99      | 80      | 103     | 99      |
| K01356 repressor LexA [EC:3.4.21.88]                                                                      | 2122    | 2065    | 2086    | 2199    | 937     | 968     | 882     | 933     | 4131    | 4493    | 4364    | 4183    |
| K01361 lactocepin [EC:3.4.21.96]                                                                          | 1       | 0       | 2       | 1       | 46      | 37      | 31      | 29      | 2       | 0       | 1       | 3       |
| K01372 bleomycin hydrolase [EC:3.4.22.40]                                                                 | 1630    | 1700    | 1912    | 1721    | 5149    | 5117    | 5161    | 4992    | 3613    | 3709    | 3770    | 3509    |
| K01387 microbial collagenase [EC:3.4.24.3]                                                                | 2       | 2       | 4       | 0       | 0       | 2       | 0       | 0       | 0       | 0       | 0       | 1       |
| K01400 bacillolysin [EC:3.4.24.28]                                                                        | 0       | 2       | 2       | 0       | 3       | 2       | 0       | 0       | 2       | 0       | 2       | 0       |
| K01407 protease III [EC:3.4.24.55]                                                                        | 1799    | 1776    | 1758    | 1826    | 1263    | 1314    | 1298    | 1308    | 2398    | 2473    | 2408    | 2555    |
| K01414 oligopeptidase A [EC:3.4.24.70]                                                                    | 3793    | 3749    | 3609    | 3777    | 2339    | 2380    | 2282    | 2412    | 2827    | 2680    | 2780    | 2850    |
| K01419 ATP-dependent HslUV protease, peptidase subunit HslV [EC:3.4.25.2]                                 | 1209    | 1214    | 1198    | 1261    | 710     | 740     | 668     | 664     | 796     | 832     | 799     | 770     |
| K01423 beta-barrel assembly-enhancing protease [EC:3.4.-.]                                                | 1117    | 1147    | 1082    | 1200    | 845     | 875     | 829     | 873     | 1072    | 1077    | 1102    | 1148    |
| K01436 amidohydrolase [EC:3.5.1.-]                                                                        | 67      | 57      | 57      | 55      | 31      | 34      | 30      | 27      | 36      | 56      | 49      | 58      |
| K02278 prelinin peptidase CpaA [EC:3.4.23.43]                                                             | 794     | 789     | 749     | 818     | 422     | 352     | 354     | 429     | 315     | 315     | 280     | 323     |
| K02506 leader peptidase HopD [EC:3.4.23.43]                                                               | 344     | 329     | 294     | 368     | 198     | 217     | 274     | 193     | 490     | 458     | 465     | 472     |
| K02654 leader peptidase (prelinin peptidase) / N-methyltransferase [EC:3.4.23.43 2.1.1.-]                 | 1657    | 1600    | 1687    | 1618    | 928     | 870     | 802     | 772     | 782     | 793     | 770     | 830     |
| K03152 protein deglycase [EC:3.5.1.124]                                                                   | 1006    | 1040    | 1095    | 1081    | 1443    | 1372    | 1442    | 1468    | 1758    | 1645    | 1604    | 1688    |
| K03503 DNA polymerase V [EC:3.4.21.-]                                                                     | 777     | 776     | 717     | 754     | 839     | 828     | 873     | 803     | 443     | 457     | 473     | 453     |
| K03568 TldD protein                                                                                       | 2812    | 2709    | 2586    | 2765    | 1562    | 1627    | 1647    | 1739    | 1859    | 1962    | 1776    | 1968    |
| K03592 PmbA protein                                                                                       | 2257    | 2097    | 2137    | 2134    | 1273    | 1341    | 1461    | 1273    | 1801    | 1655    | 1593    | 1751    |
| K03605 hydrogenase maturation protease [EC:3.4.23.-]                                                      | 160     | 146     | 132     | 161     | 216     | 266     | 241     | 204     | 123     | 105     | 101     | 107     |
| K03797 carboxyl-terminal processing protease [EC:3.4.21.102]                                              | 10362   | 10318   | 10581   | 10739   | 15231   | 15344   | 15241   | 14813   | 12139   | 11830   | 12439   | 11888   |
| K03798 cell division protease FtsH [EC:3.4.24.-]                                                          | 7788    | 7625    | 8090    | 7725    | 7320    | 7558    | 7310    | 6910    | 8155    | 8566    | 8405    | 8347    |
| K03799 heat shock protein HtpX [EC:3.4.24.-]                                                              | 1932    | 1906    | 1866    | 1996    | 2826    | 2657    | 2691    | 2523    | 2365    | 2311    | 2436    | 2342    |
| K04076 ATP-dependent Lon protease [EC:3.4.21.53]                                                          | 6       | 1       | 3       | 3       | 2       | 3       | 1       | 0       | 10      | 16      | 19      | 14      |
| K04691 serine protease DegS [EC:3.4.21.-]                                                                 | 2563    | 2511    | 2407    | 2530    | 1527    | 1551    | 1497    | 1434    | 1497    | 1601    | 1489    | 1543    |
| K04770 Lon-like ATP-dependent protease [EC:3.4.21.-]                                                      | 960     | 994     | 886     | 1025    | 696     | 752     | 709     | 675     | 1367    | 1431    | 1364    | 1427    |
| K04772 serine protease DegQ [EC:3.4.21.-]                                                                 | 898     | 908     | 896     | 996     | 557     | 748     | 584     | 656     | 1320    | 1255    | 1277    | 1285    |
| K04773 protease IV [EC:3.4.21.-]                                                                          | 2343    | 2493    | 2529    | 2537    | 4719    | 4893    | 4974    | 4673    | 4443    | 4195    | 4303    | 4345    |
| K04774 serine protease SohB [EC:3.4.21.-]                                                                 | 1739    | 1727    | 1810    | 1757    | 988     | 1051    | 1047    | 1104    | 1009    | 1067    | 962     | 1068    |
| K04775 protease YigB [EC:3.4.21.-]                                                                        | 426     | 452     | 523     | 548     | 278     | 367     | 321     | 320     | 655     | 687     | 656     | 634     |
| K05520 protease I [EC:3.5.1.124]                                                                          | 3325    | 3317    | 3206    | 3126    | 1795    | 1778    | 1762    | 1856    | 1793    | 1858    | 1688    | 1838    |
| K05995 dipeptidase E [EC:3.4.13.21]                                                                       | 245     | 282     | 261     | 261     | 127     | 120     | 103     | 1       |         |         |         |         |

|                                                                                                                                                                          |        |        |        |        |       |       |       |       |       |       |       |       |
|--------------------------------------------------------------------------------------------------------------------------------------------------------------------------|--------|--------|--------|--------|-------|-------|-------|-------|-------|-------|-------|-------|
| K08659 dipeptidase [EC:3.4.-.-]                                                                                                                                          | 78     | 86     | 97     | 70     | 111   | 149   | 146   | 112   | 98    | 105   | 115   | 101   |
| K08675 ATP-dependent Lon protease [EC:3.4.21.53]                                                                                                                         | 1      | 1      | 2      | 0      | 0     | 0     | 0     | 3     | 0     | 1     | 0     | 1     |
| K08676 tricorn protease [EC:3.4.21.-]                                                                                                                                    | 432    | 429    | 472    | 380    | 594   | 614   | 591   | 607   | 39    | 82    | 76    | 98    |
| K08956 AFG3 family protein [EC:3.4.24.-]                                                                                                                                 | 0      | 0      | 1      | 1      | 0     | 0     | 1     | 0     | 1     | 0     | 1     | 0     |
| K09612 alkaline phosphatase isozyme conversion protein [EC:3.4.11.-]                                                                                                     | 654    | 690    | 565    | 665    | 465   | 463   | 486   | 424   | 838   | 893   | 842   | 877   |
| K09933 MtfA peptidase                                                                                                                                                    | 1509   | 1478   | 1471   | 1503   | 858   | 940   | 830   | 934   | 1024  | 1037  | 1000  | 960   |
| K11873 ubiquitin carboxyl-terminal hydrolase 10 [EC:3.4.19.12]                                                                                                           | 0      | 0      | 0      | 0      | 0     | 0     | 0     | 0     | 1     | 0     | 0     | 0     |
| K12940 aminobenzoyle-glutamate utilization protein A                                                                                                                     | 943    | 959    | 980    | 936    | 529   | 600   | 494   | 577   | 1501  | 1484  | 1403  | 1592  |
| K12941 aminobenzoyle-glutamate utilization protein B                                                                                                                     | 920    | 955    | 853    | 936    | 260   | 320   | 320   | 301   | 1455  | 1445  | 1389  | 1514  |
| K13049 carboxypeptidase PM2001 [EC:3.4.17.-]                                                                                                                             | 391    | 380    | 420    | 385    | 123   | 135   | 105   | 133   | 755   | 730   | 702   | 782   |
| K13274 cell wall-associated protease [EC:3.4.21.-]                                                                                                                       | 0      | 0      | 1      | 0      | 0     | 0     | 0     | 0     | 1     | 0     | 2     | 0     |
| K13275 major intracellular serine protease [EC:3.4.21.-]                                                                                                                 | 1      | 0      | 1      | 0      | 0     | 2     | 1     | 0     | 0     | 0     | 0     | 0     |
| K13277 minor extracellular protease Epr [EC:3.4.21.-]                                                                                                                    | 1      | 1      | 0      | 1      | 0     | 0     | 0     | 1     | 3     | 1     | 2     | 3     |
| K13282 cyanophycinase [EC:3.4.15.6]                                                                                                                                      | 2      | 0      | 0      | 4      | 0     | 0     | 0     | 0     | 2     | 3     | 4     | 9     |
| K13617 protein phosphatase methylesterase 1 [EC:3.1.1.89]                                                                                                                | 0      | 1      | 0      | 0      | 0     | 0     | 0     | 0     | 0     | 0     | 0     | 0     |
| K13694 murein DD-endopeptidase / murein LD-carboxypeptidase [EC:3.4.-.- 3.4.17.13]                                                                                       | 626    | 682    | 669    | 680    | 1330  | 1339  | 1365  | 1374  | 1176  | 1239  | 1166  | 1212  |
| K13695 probable lipoprotein NlpC                                                                                                                                         | 306    | 264    | 250    | 325    | 169   | 226   | 215   | 220   | 454   | 422   | 435   | 474   |
| K14358 secernin                                                                                                                                                          | 33     | 26     | 30     | 27     | 18    | 29    | 22    | 5     | 30    | 24    | 49    | 31    |
| K14664 IAA-amino acid hydrolase [EC:3.5.1.-]                                                                                                                             | 50     | 49     | 37     | 37     | 15    | 18    | 14    | 10    | 29    | 35    | 45    | 40    |
| K14665 amidohydrolase [EC:3.5.1.-]                                                                                                                                       | 99     | 105    | 107    | 96     | 66    | 76    | 79    | 100   | 150   | 130   | 118   | 160   |
| K16203 D-amino peptidase [EC:3.4.11.-]                                                                                                                                   | 307    | 278    | 286    | 296    | 38    | 42    | 52    | 64    | 279   | 295   | 254   | 285   |
| K16291 L,D-transpeptidase ErfK/SrK                                                                                                                                       | 1765   | 1865   | 1835   | 1934   | 1045  | 1039  | 1088  | 1173  | 1196  | 1150  | 1097  | 1200  |
| K16922 putative peptide zinc metalloprotease protein                                                                                                                     | 464    | 402    | 417    | 446    | 713   | 704   | 673   | 661   | 44    | 63    | 60    | 66    |
| K17733 peptidoglycan LD-endopeptidase CwIk [EC:3.4.-.-]                                                                                                                  | 334    | 319    | 389    | 343    | 32    | 18    | 28    | 36    | 53    | 54    | 44    | 48    |
| K17734 serine protease AprX [EC:3.4.21.-]                                                                                                                                | 892    | 797    | 761    | 819    | 103   | 107   | 109   | 103   | 529   | 629   | 516   | 618   |
| K18015 deubiquitinase [EC:3.4.22.-]                                                                                                                                      | 0      | 0      | 0      | 0      | 8     | 6     | 7     | 4     | 0     | 1     | 3     | 1     |
| K18530 putative aminopeptidase FrvX [EC:3.4.11.-]                                                                                                                        | 0      | 14     | 7      | 0      | 6     | 5     | 0     | 0     | 0     | 0     | 13    | 0     |
| K18545 streptogristin B [EC:3.4.21.81]                                                                                                                                   | 1      | 0      | 0      | 0      | 0     | 0     | 0     | 0     | 0     | 0     | 0     | 0     |
| K18574 Xaa-Xaa-Pro tripeptidyl-peptidase [EC:3.4.14.12]                                                                                                                  | 0      | 0      | 0      | 0      | 0     | 0     | 0     | 0     | 0     | 0     | 0     | 1     |
| K18988 serine-type D-Ala-D-Ala carboxypeptidase/endopeptidase [EC:3.4.16.4 3.4.21.-]                                                                                     | 667    | 674    | 636    | 719    | 467   | 538   | 521   | 514   | 873   | 937   | 834   | 1066  |
| K19223 peptidoglycan DL-endopeptidase LytF [EC:3.4.-.-]                                                                                                                  | 0      | 0      | 0      | 0      | 0     | 0     | 0     | 0     | 0     | 1     | 0     | 0     |
| K19224 peptidoglycan DL-endopeptidase LytE [EC:3.4.-.-]                                                                                                                  | 2      | 1      | 0      | 3      | 0     | 0     | 0     | 0     | 0     | 0     | 0     | 0     |
| K19225 rhomboid protease GluP [EC:3.4.21.105]                                                                                                                            | 353    | 338    | 399    | 368    | 76    | 61    | 147   | 107   | 287   | 300   | 320   | 298   |
| K19234 L,D-transpeptidase YnhG                                                                                                                                           | 508    | 548    | 466    | 562    | 351   | 389   | 342   | 351   | 715   | 748   | 827   | 736   |
| K19235 L,D-transpeptidase YhbS                                                                                                                                           | 580    | 550    | 585    | 605    | 365   | 413   | 410   | 378   | 804   | 916   | 820   | 888   |
| K19303 murein DD-endopeptidase [EC:3.4.-.-]                                                                                                                              | 369    | 352    | 381    | 376    | 247   | 283   | 252   | 256   | 505   | 494   | 484   | 516   |
| K19304 murein DD-endopeptidase [EC:3.4.24.-]                                                                                                                             | 764    | 809    | 732    | 753    | 484   | 502   | 565   | 436   | 1041  | 1053  | 1015  | 1025  |
| K19689 aminopeptidase [EC:3.4.11.-]                                                                                                                                      | 220    | 221    | 231    | 227    | 118   | 120   | 109   | 115   | 369   | 397   | 361   | 350   |
| K19701 aminopeptidase YwaD [EC:3.4.11.6 3.4.11.10]                                                                                                                       | 4      | 3      | 2      | 1      | 0     | 0     | 2     | 0     | 4     | 9     | 2     | 4     |
| K20609 putative aminopeptidase [EC:3.4.11.-]                                                                                                                             | 7      | 3      | 3      | 1      | 30    | 20    | 18    | 10    | 13    | 17    | 14    | 12    |
| K20742 gamma-D-glutamyl-L-lysine dipeptidyl-peptidase [EC:3.4.14.13]                                                                                                     | 8      | 3      | 1      | 4      | 4     | 1     | 1     | 0     | 0     | 1     | 5     | 1     |
| K21429 immunomodulating metalloprotease                                                                                                                                  | 4119   | 4025   | 4030   | 4143   | 2436  | 2246  | 2231  | 2494  | 1320  | 1279  | 1297  | 1231  |
| K21470 L,D-transpeptidase YcbB                                                                                                                                           | 1717   | 1737   | 1747   | 1725   | 3271  | 3384  | 3089  | 3146  | 3391  | 3151  | 3376  | 3247  |
| K21471 peptidoglycan DL-endopeptidase CwIo [EC:3.4.-.-]                                                                                                                  | 867    | 841    | 861    | 899    | 208   | 206   | 199   | 146   | 828   | 922   | 839   | 940   |
| K21472 peptidoglycan LD-endopeptidase LytH [EC:3.4.-.-]                                                                                                                  | 1764   | 1799   | 1830   | 1889   | 715   | 731   | 708   | 652   | 994   | 1137  | 1006  | 970   |
| K21473 peptidoglycan DL-endopeptidase RipA [EC:3.4.-.-]                                                                                                                  | 45     | 37     | 51     | 36     | 7     | 5     | 12    | 6     | 19    | 16    | 18    | 20    |
| K21604 jasmonoyl-L-amino acid hydrolase [EC:3.5.1.127]                                                                                                                   | 35     | 21     | 20     | 19     | 7     | 4     | 2     | 7     | 10    | 10    | 20    | 14    |
| K21613 uncharacterized hydrolase [EC:3.-.-.-]                                                                                                                            | 651    | 676    | 666    | 657    | 403   | 457   | 462   | 392   | 873   | 863   | 914   | 941   |
| K22684 metacaspase-1 [EC:3.4.22.-]                                                                                                                                       | 5      | 5      | 3      | 5      | 21    | 17    | 16    | 10    | 13    | 16    | 10    | 7     |
| ko01003 Glycosyltransferases                                                                                                                                             | 81413  | 80648  | 79395  | 80901  | 66846 | 67819 | 66539 | 67375 | 64413 | 65616 | 63893 | 65524 |
| K00712 poly(glycerol-phosphate) alpha-glucosyltransferase [EC:2.4.1.52]                                                                                                  | 1      | 4      | 3      | 2      | 14    | 17    | 5     | 12    | 4     | 5     | 7     | 4     |
| K00752 hyaluronan synthase [EC:2.4.1.212]                                                                                                                                | 3      | 5      | 2      | 5      | 0     | 0     | 0     | 0     | 8     | 12    | 8     | 17    |
| K02852 UDP-N-acetyl-D-mannosaminouronate:lipid I N-acetyl-D-mannosaminouronosyltransferase [EC:2.4.1.180]                                                                | 560    | 511    | 479    | 515    | 365   | 373   | 357   | 363   | 635   | 726   | 589   | 642   |
| K02853 enterobacterial common antigen polymerase [EC:2.4.1.-]                                                                                                            | 809    | 899    | 795    | 846    | 605   | 632   | 657   | 614   | 1127  | 1164  | 1181  | 1109  |
| K03669 membrane glycosyltransferase [EC:2.4.1.-]                                                                                                                         | 5774   | 5722   | 5474   | 5489   | 3213  | 3386  | 3125  | 3361  | 3286  | 3310  | 3247  | 3280  |
| K05841 sterol 3beta-glucosyltransferase [EC:2.4.1.173]                                                                                                                   | 0      | 0      | 0      | 1      | 0     | 0     | 0     | 1     | 0     | 0     | 0     | 0     |
| K07272 rhamnosyltransferase [EC:2.4.1.-]                                                                                                                                 | 0      | 1      | 11     | 7      | 2     | 5     | 4     | 2     | 4     | 15    | 8     | 7     |
| K12246 poly-alpha-2,8 sialosyl sialyltransferase [EC:2.4.-.-]                                                                                                            | 2      | 2      | 0      | 3      | 1     | 2     | 5     | 2     | 42    | 46    | 47    | 44    |
| K12582 dTDP-N-acetylglucosamine:lipid II N-acetylglucosaminyltransferase [EC:2.4.1.325]                                                                                  | 708    | 674    | 674    | 725    | 513   | 549   | 543   | 522   | 952   | 1073  | 1006  | 938   |
| K12584 (heptosyl)PS beta-1,4-glucosyltransferase [EC:2.4.1.-]                                                                                                            | 457    | 513    | 487    | 553    | 316   | 328   | 323   | 307   | 576   | 681   | 585   | 713   |
| K12987 alpha-1,6-rhamnosyltransferase [EC:2.4.1.-]                                                                                                                       | 1395   | 1444   | 1276   | 1335   | 751   | 721   | 757   | 811   | 387   | 395   | 405   | 424   |
| K12988 alpha-1,3-rhamnosyltransferase [EC:2.4.1.-]                                                                                                                       | 1512   | 1450   | 1517   | 1459   | 845   | 886   | 809   | 891   | 526   | 454   | 438   | 470   |
| K12989 mannosyltransferase [EC:2.4.1.-]                                                                                                                                  | 0      | 0      | 0      | 1      | 0     | 0     | 0     | 0     | 1     | 3     | 0     | 0     |
| K12993 alpha-1,2-mannosyltransferase/rhamnosyltransferase [EC:2.4.1.-]                                                                                                   | 2502   | 2467   | 2362   | 2314   | 1352  | 1344  | 1294  | 1437  | 815   | 745   | 719   | 759   |
| K12994 mannosyl-N-acetyl-alpha-D-glucosaminyl-diphospho-ditrans,octakis-undecaprenol 3-alpha-mannosyltransferase / alpha-1,3-rhamnosyltransferase (EC:2.4.1.348 2.4.1.-) | 1773   | 1621   | 1670   | 1624   | 918   | 947   | 883   | 1001  | 528   | 487   | 546   | 512   |
| K12995 N-acetyl-alpha-D-glucosaminyl-diphospho-ditrans,octakis-undecaprenol 3-alpha-mannosyltransferase / rhamnosyltransferase [EC:2.4.1.348 2.4.1.-]                    | 1877   | 1871   | 1885   | 1945   | 1994  | 1942  | 1898  | 1889  | 1242  | 1149  | 1209  | 1134  |
| K12996 rhamnosyltransferase [EC:2.4.1.-]                                                                                                                                 | 8      | 5      | 8      | 11     | 51    | 59    | 49    | 63    | 30    | 21    | 41    | 26    |
| K12997 rhamnosyltransferase [EC:2.4.1.-]                                                                                                                                 | 25     | 33     | 31     | 44     | 8     | 10    | 12    | 10    | 3     | 7     | 1     | 6     |
| K12999 glucosyltransferase [EC:2.4.1.-]                                                                                                                                  | 2      | 0      | 4      | 0      | 1     | 2     | 0     | 0     | 0     | 1     | 1     | 3     |
| K13002 glycosyltransferase [EC:2.4.1.-]                                                                                                                                  | 101    | 100    | 110    | 89     | 100   | 122   | 156   | 136   | 19    | 11    | 12    | 26    |
| K13004 galacturonosyltransferase [EC:2.4.1.-]                                                                                                                            | 67     | 69     | 69     | 70     | 30    | 24    | 15    | 16    | 64    | 84    | 100   | 95    |
| K13007 Fuc2NAc and GlcNAc transferase [EC:2.4.1.-]                                                                                                                       | 1379   | 1391   | 1452   | 1529   | 765   | 789   | 868   | 858   | 467   | 453   | 411   | 414   |
| K13678 1,2-diacylglycerol-3-alpha-glucose alpha-1,2-galactosyltransferase [EC:2.4.1.-]                                                                                   | 24     | 55     | 40     | 29     | 7     | 17    | 9     | 5     | 96    | 95    | 86    | 90    |
| K13683 putative colanic acid biosynthesis glycosyltransferase [EC:2.4.-.-]                                                                                               | 132    | 133    | 147    | 175    | 189   | 201   | 181   | 198   | 56    | 35    | 45    | 52    |
| K13684 putative colanic acid biosynthesis glycosyltransferase [EC:2.4.-.-]                                                                                               | 268    | 254    | 259    | 296    | 320   | 354   | 352   | 336   | 70    | 76    | 61    | 74    |
| K13688 cyclic beta-1,2-glucan synthetase [EC:2.4.1.-]                                                                                                                    | 19     | 17     | 10     | 11     | 3     | 9     | 0     | 3     | 20    | 19    | 13    | 17    |
| K16555 succinyl-galactonic acid biosynthesis protein ExoO [EC:2.4.-.-]                                                                                                   | 0      | 0      | 0      | 0      | 1     | 0     | 1     | 0     | 1     | 0     | 0     | 0     |
| K16698 teichuronic acid biosynthesis glycosyltransferase TuoG [EC:2.4.-.-]                                                                                               | 93     | 97     | 103    | 96     | 37    | 30    | 28    | 25    | 129   | 114   | 90    | 101   |
| K16702 amylovoran biosynthesis glycosyltransferase AmsE [EC:2.4.-.-]                                                                                                     | 1      | 1      | 2      | 0      | 0     | 0     | 0     | 0     | 3     | 9     | 10    | 5     |
| K16703 colanic acid/amylovoran biosynthesis glycosyltransferase [EC:2.4.-.-]                                                                                             | 251    | 243    | 225    | 259    | 311   | 370   | 350   | 342   | 45    | 53    | 87    | 53    |
| K17248 N-acetylgalactosamine-N,N'-diacetylbaicillosaminyl-diphospho-undecaprenol 4-alpha-N-acetylgalactosaminyltransferase [EC:2.4.1.291]                                | 0      | 0      | 0      | 0      | 0     | 0     | 0     | 1     | 0     | 0     | 0     | 0     |
| K17249 GalNAc-alpha-(1->4)-GalNAc-alpha-1,3-alpha-GalNAc-diphosphoundecaprenol alpha-1,4-N-acetyl-D-galactosaminyltransferase [EC:2.4.1.292]                             | 1      | 0      | 0      | 0      | 0     | 0     | 0     | 0     | 0     | 0     | 0     | 0     |
| K19354 heptose III glucuronosyltransferase [EC:2.4.1.-]                                                                                                                  | 8      | 9      | 0      | 5      | 14    | 27    | 12    | 10    | 60    | 50    | 56    | 79    |
| K19423 glycosyltransferase EpsE [EC:2.4.-.-]                                                                                                                             | 4      | 6      | 12     | 9      | 4     | 2     | 5     | 1     | 4     | 2     | 2     | 2     |
| K19424 glycosyltransferase EpsF [EC:2.4.-.-]                                                                                                                             | 53     | 46     | 31     | 45     | 19    | 22    | 16    | 21    | 37    | 35    | 25    | 31    |
| K19425 glycosyltransferase EpsH [EC:2.4.-.-]                                                                                                                             | 20     | 19     | 19     | 28     | 27    | 26    | 23    | 23    | 11    | 10    | 13    | 13    |
| K20151 alpha(1,3/1,4) fucosyltransferase [EC:2.4.1.65 2.4.1.152]                                                                                                         | 53     | 58     | 67     | 71     | 153   | 123   | 146   | 128   | 133   | 114   | 116   | 165   |
| K20926 cellobiuronic acid synthase [EC:2.4.1.-]                                                                                                                          | 7      | 6      | 3      | 7      | 3     | 5     | 3     | 1     | 6     | 8     | 3     | 12    |
| K21306 dolichyl-phosphooligosaccharide-protein glycotransferase [EC:2.4.99.21]                                                                                           | 0      | 8      | 0      | 1      | 3     | 0     | 0     | 3     | 19    | 20    | 4     | 31    |
| K21363 UDP-Glc:alpha-D-GlcNAc-glucosaminyl-diphosphoundecaprenol beta-1,3-glucosyltransferase [EC:2.4.1.305]                                                             | 0      | 0      | 0      | 0      | 0     | 0     | 0     | 0     | 0     | 0     | 1     | 0     |
| K21365 UDP-GalNAc:alpha-D-GalNAc-diphosphoundecaprenol alpha-1,3-N-acetylgalactosaminyltransferase [EC:2.4.1.306]                                                        | 0      | 2      | 0      | 1      | 0     | 2     | 0     | 0     | 0     | 0     | 3     | 1     |
| K21367 GDP-Fuc:beta-D-Gal-1,3-alpha-D-GalNAc-1,3-alpha-GalNAc-diphosphoundecaprenol alpha-1,2-fucosyltransferase [EC:2.4.1.308]                                          | 1      | 1      | 3      | 0      | 1     | 0     | 0     | 1     | 0     | 0     | 1     | 0     |
| K22708 poly(ribitol-phosphate) beta-N-acetylglucosaminyltransferase [EC:2.4.1.355]                                                                                       | 0      | 0      | 0      | 0      | 0     | 0     | 0     | 1     | 0     | 0     | 0     | 0     |
| ko01005 Lipopolysaccharide biosynthesis proteins                                                                                                                         | 106121 | 105764 | 104351 | 106555 | 92358 | 93522 | 88724 | 90743 | 84571 | 85176 | 84139 | 85816 |
| K00996 undecaprenyl-phosphate galactose phosphotransferase [EC:2.7.8.6]                                                                                                  | 176    | 186    | 169    | 186    | 22    | 20    | 19    | 15    | 185   | 199   | 178   | 208   |
| K05789 chain length determinant protein (polysaccharide antigen chain regulator)                                                                                         | 1372   | 1425   | 1609   | 1488   | 846   | 894   | 792   | 821   | 466   | 501   | 505   | 517   |
| K08280 lipopolysaccharide O-acetyltransferase [EC:2.3.1.-]                                                                                                               | 0      | 0      | 0      | 0      | 2     | 2     | 0     | 0     | 2     | 0     | 0     | 0     |
| K13006 UDP-persamine 4-acetyltransferase [EC:2.3.1.-]                                                                                                                    | 0      | 0      | 0      | 1      | 4     | 1     | 0     | 0     | 1     | 2     | 1     | 3     |
| K13012 O-antigen biosynthesis protein WbqP                                                                                                                               | 5      | 4      | 7      | 10     | 9     | 18    | 8     | 14    | 79    | 62    | 51    | 56    |
| K13013 O-antigen biosynthesis protein WbqV                                                                                                                               | 0      | 0      | 0      | 0      | 0     | 0     | 0     | 0     | 1     | 0     | 0     | 0     |
| K19714 3-deoxy-alpha-D-manno-octulosonate 8-oxidase [EC:1.1.3.48]                                                                                                        | 32     | 19     | 15     | 22     | 1     | 6</   |       |       |       |       |       |       |

|                                                                                                                 |         |         |         |         |         |         |         |         |         |         |         |         |
|-----------------------------------------------------------------------------------------------------------------|---------|---------|---------|---------|---------|---------|---------|---------|---------|---------|---------|---------|
| K12436 polyketide synthase 12                                                                                   | 1       | 1       | 0       | 0       | 0       | 0       | 2       | 1       | 2       | 2       | 0       | 1       |
| K12441 phthiocerol/phenolphthiocerol synthesis type-I polyketide synthase B                                     | 0       | 0       | 0       | 0       | 0       | 0       | 0       | 0       | 0       | 0       | 0       | 1       |
| K12443 phthiocerol/phenolphthiocerol synthesis type-I polyketide synthase D                                     | 0       | 0       | 0       | 0       | 0       | 2       | 0       | 0       | 1       | 0       | 0       | 1       |
| K12500 thioesterase III [EC:3.1.2.-]                                                                            | 226     | 213     | 210     | 212     | 173     | 197     | 150     | 175     | 314     | 306     | 303     | 300     |
| K12507 acyl-CoA synthetase [EC:6.2.1.-]                                                                         | 1121    | 1025    | 1003    | 1199    | 746     | 864     | 756     | 735     | 607     | 677     | 616     | 660     |
| K13611 polyketide synthase PksJ                                                                                 | 230     | 202     | 236     | 214     | 43      | 38      | 64      | 37      | 4       | 4       | 3       | 9       |
| K13614 polyketide synthase PksN                                                                                 | 20      | 16      | 23      | 17      | 18      | 9       | 20      | 10      | 7       | 3       | 9       | 15      |
| ko01008 polyketide biosynthesis proteins                                                                        | 32760   | 31711   | 29474   | 30693   | 15551   | 15491   | 14954   | 15681   | 27362   | 27072   | 26152   | 27715   |
| K05374 yersiniabactin synthetase, thioesterase component                                                        | 316     | 272     | 276     | 262     | 107     | 92      | 91      | 73      | 571     | 625     | 621     | 644     |
| K12242 pyocellin biosynthetic protein PdcC                                                                      | 1242    | 1262    | 1098    | 1186    | 614     | 572     | 659     | 700     | 436     | 322     | 383     | 394     |
| K15395 hybrid polyketide synthase / nonribosomal peptide synthetase FtdB                                        | 0       | 0       | 0       | 0       | 0       | 0       | 0       | 0       | 0       | 0       | 1       | 0       |
| K15644 coronafacic acid polyketide synthase Cfa6                                                                | 0       | 0       | 1       | 0       | 0       | 0       | 0       | 0       | 1       | 0       | 0       | 0       |
| K16167 alkylresorcinol/alkylpyrone synthase                                                                     | 3       | 3       | 2       | 0       | 0       | 0       | 0       | 0       | 0       | 0       | 0       | 0       |
| ko01006 Prenyltransferases                                                                                      | 17179   | 16907   | 17291   | 17177   | 19862   | 19971   | 20297   | 19622   | 18072   | 18543   | 18348   | 18473   |
| ko01007 Amino acid related enzymes                                                                              | 214733  | 214798  | 216352  | 217549  | 215793  | 218266  | 216152  | 215217  | 213973  | 214937  | 213659  | 214340  |
| K01894 glutamyl-Q tRNA(Asp) synthetase [EC:6.1.1.-]                                                             | 845     | 870     | 743     | 838     | 574     | 587     | 566     | 603     | 880     | 875     | 880     | 887     |
| K02805 dTDP-4-amino-4,6-dideoxygalactose transaminase [EC:2.6.1.59]                                             | 810     | 811     | 730     | 867     | 581     | 637     | 644     | 628     | 1307    | 1313    | 1244    | 1311    |
| K03918 L-lysine 6-transaminase [EC:2.6.1.36]                                                                    | 0       | 3       | 0       | 0       | 0       | 0       | 0       | 0       | 2       | 0       | 1       | 4       |
| K09469 2-aminoethylphosphonate-pyruvate transaminase                                                            | 1       | 1       | 0       | 2       | 1       | 2       | 1       | 0       | 2       | 5       | 3       | 7       |
| K10907 aminotransferase [EC:2.6.1.-]                                                                            | 857     | 901     | 966     | 948     | 387     | 395     | 421     | 346     | 962     | 958     | 984     | 1002    |
| K14261 alanine-synthesizing transaminase [EC:2.6.1.-]                                                           | 3003    | 2884    | 2815    | 2903    | 1682    | 1769    | 1641    | 1842    | 1819    | 1690    | 1727    | 1872    |
| K14287 methionine transaminase [EC:2.6.1.88]                                                                    | 2671    | 2695    | 2605    | 2714    | 1498    | 1677    | 1599    | 1631    | 1569    | 1556    | 1663    | 1710    |
| ko00199 Cytochrome P450                                                                                         | 0       | 1       | 0       | 0       | 12      | 15      | 5       | 5       | 23      | 25      | 29      | 24      |
| K15629 fatty-acid peroxxygenase [EC:1.11.2.4]                                                                   | 0       | 0       | 0       | 0       | 12      | 15      | 5       | 5       | 23      | 23      | 29      | 24      |
| K12119 cytochrome P450 family 130                                                                               | 0       | 1       | 0       | 0       | 0       | 0       | 0       | 0       | 0       | 2       | 0       | 0       |
| ko00194 Photosynthesis proteins                                                                                 | 26142   | 26229   | 27048   | 26875   | 24434   | 24776   | 24578   | 24154   | 24174   | 24255   | 24515   | 24112   |
| K02116 ATP synthase protein I                                                                                   | 1054    | 987     | 1040    | 1044    | 541     | 583     | 555     | 517     | 615     | 593     | 625     | 641     |
| Protein families: genetic information processing                                                                | 1747091 | 1747644 | 1751205 | 1755209 | 1724736 | 1740347 | 1733233 | 1727195 | 1747550 | 1755511 | 1742577 | 1751148 |
| ko03000 Transcription factors                                                                                   | 267307  | 264211  | 259048  | 263978  | 192182  | 194183  | 190278  | 194023  | 243829  | 248530  | 239279  | 248388  |
| K00375 GntR family transcriptional regulator / MocR family aminotransferase                                     | 9309    | 9057    | 8594    | 8770    | 5533    | 6034    | 5760    | 5940    | 6407    | 6969    | 6832    | 6897    |
| K01420 CRP/FNR family transcriptional regulator, anaerobic regulatory protein                                   | 915     | 958     | 938     | 957     | 594     | 719     | 649     | 622     | 1045    | 1013    | 1019    | 1034    |
| K01926 redox-sensing transcriptional repressor                                                                  | 1048    | 1051    | 1164    | 1089    | 1553    | 1544    | 1630    | 1537    | 1544    | 1535    | 1526    | 1594    |
| K01994 LuxR family transcriptional regulator, transcriptional regulator of spore coat protein                   | 0       | 0       | 0       | 0       | 0       | 0       | 0       | 0       | 0       | 2       | 0       | 3       |
| K02019 molybdate transport system regulatory protein                                                            | 1759    | 1695    | 1606    | 1642    | 1053    | 1053    | 1001    | 1031    | 1222    | 1209    | 1084    | 1227    |
| K02043 GntR family transcriptional regulator, phosphonate transport system regulatory protein                   | 1247    | 1213    | 1124    | 1115    | 571     | 562     | 586     | 582     | 888     | 910     | 878     | 962     |
| K02076 Fur family transcriptional regulator, zinc uptake regulator                                              | 21      | 30      | 38      | 29      | 5       | 5       | 8       | 6       | 22      | 25      | 24      | 29      |
| K02081 DeoR family transcriptional regulator, aga operon transcriptional repressor                              | 441     | 377     | 391     | 366     | 526     | 607     | 559     | 517     | 129     | 139     | 129     | 164     |
| K02099 AraC family transcriptional regulator, arabinose operon regulatory protein                               | 972     | 952     | 836     | 1021    | 555     | 537     | 571     | 593     | 1444    | 1513    | 1410    | 1574    |
| K02103 GntR family transcriptional regulator, arabinose operon transcriptional repressor                        | 444     | 456     | 435     | 469     | 118     | 85      | 115     | 92      | 416     | 470     | 387     | 413     |
| K02167 TetR/AcrR family transcriptional regulator, transcriptional repressor of bet genes                       | 452     | 396     | 369     | 385     | 177     | 190     | 196     | 178     | 548     | 542     | 538     | 545     |
| K02430 DeoR family transcriptional regulator, L-fucose operon activator                                         | 446     | 498     | 463     | 488     | 274     | 299     | 318     | 292     | 542     | 581     | 511     | 611     |
| K02436 DeoR family transcriptional regulator, galactitol utilization operon repressor                           | 2       | 6       | 0       | 3       | 3       | 9       | 9       | 16      | 34      | 37      | 39      | 50      |
| K02443 glycerol uptake operon antiterminator                                                                    | 214     | 198     | 211     | 265     | 113     | 138     | 109     | 99      | 572     | 584     | 559     | 565     |
| K02444 DeoR family transcriptional regulator, glycerol-3-phosphate regulon repressor                            | 2405    | 2299    | 2330    | 2391    | 1580    | 1734    | 1588    | 1556    | 1731    | 1634    | 1528    | 1741    |
| K02468 DeoR family transcriptional regulator, glucitol operon repressor                                         | 446     | 452     | 399     | 481     | 347     | 270     | 327     | 288     | 564     | 638     | 614     | 668     |
| K02508 AraC family transcriptional regulator, 4-hydroxyphenylacetate 3-monooxygenase operon regulatory protein  | 609     | 614     | 614     | 629     | 267     | 250     | 280     | 262     | 842     | 795     | 820     | 865     |
| K02521 LysR family transcriptional regulator, positive regulator for ilvC                                       | 628     | 644     | 563     | 699     | 414     | 501     | 434     | 434     | 838     | 881     | 861     | 880     |
| K02525 LacI family transcriptional regulator, kdg operon repressor                                              | 1294    | 1214    | 1176    | 1171    | 751     | 780     | 798     | 798     | 906     | 901     | 922     | 955     |
| K02529 LacI family transcriptional regulator                                                                    | 15200   | 15226   | 15889   | 15612   | 18828   | 18535   | 19422   | 18441   | 25315   | 25807   | 25165   | 25397   |
| K02530 DeoR family transcriptional regulator, lactose phosphotransferase system repressor                       | 102     | 93      | 76      | 84      | 39      | 33      | 32      | 23      | 115     | 132     | 119     | 117     |
| K02531 transcriptional antiterminator                                                                           | 1       | 4       | 8       | 0       | 6       | 0       | 0       | 0       | 0       | 0       | 7       | 0       |
| K02538 activator of the mannose operon, transcriptional antiterminator                                          | 485     | 537     | 509     | 560     | 560     | 634     | 589     | 522     | 288     | 363     | 296     | 302     |
| K02562 mannitol operon repressor                                                                                | 357     | 391     | 287     | 388     | 240     | 316     | 272     | 280     | 535     | 479     | 468     | 568     |
| K02565 N-acetylglucosamine repressor                                                                            | 755     | 714     | 672     | 704     | 462     | 526     | 483     | 493     | 1003    | 1034    | 925     | 1058    |
| K02616 phenylacetic acid degradation operon negative regulatory protein                                         | 336     | 336     | 297     | 358     | 89      | 91      | 77      | 102     | 649     | 733     | 553     | 662     |
| K02623 LysR family transcriptional regulator, pca operon transcriptional activator                              | 2094    | 1934    | 1843    | 1834    | 1044    | 1014    | 940     | 1142    | 754     | 631     | 590     | 623     |
| K02624 iCIR family transcriptional regulator, pca regulon regulatory protein                                    | 1333    | 1389    | 1333    | 1337    | 505     | 530     | 460     | 460     | 1800    | 1921    | 1929    | 1984    |
| K02647 carbohydrate diacid regulator                                                                            | 3542    | 3281    | 3274    | 3415    | 1611    | 1548    | 1451    | 1536    | 2814    | 2985    | 2706    | 2889    |
| K02688 transcriptional regulator, propionate catabolism operon regulatory protein                               | 2419    | 2375    | 2375    | 2296    | 1329    | 1282    | 1200    | 1335    | 789     | 809     | 801     | 779     |
| K02854 AraC family transcriptional regulator, L-hamose operon transcriptional activator RhaR                    | 643     | 562     | 562     | 541     | 379     | 419     | 397     | 441     | 842     | 877     | 744     | 858     |
| K02855 AraC family transcriptional regulator, L-hamose operon regulatory protein RhaS                           | 643     | 627     | 558     | 637     | 381     | 442     | 461     | 378     | 711     | 676     | 650     | 770     |
| K03402 transcriptional regulator of arginine metabolism                                                         | 938     | 1002    | 1025    | 1003    | 1326    | 1408    | 1364    | 1216    | 1418    | 1484    | 1462    | 1469    |
| K03435 LacI family transcriptional regulator, fructose operon transcriptional repressor                         | 2642    | 2519    | 2343    | 2462    | 1260    | 1224    | 1308    | 1438    | 2130    | 1987    | 2055    | 2111    |
| K03436 DeoR family transcriptional regulator, fructose operon transcriptional repressor                         | 390     | 361     | 358     | 398     | 59      | 70      | 66      | 63      | 687     | 786     | 739     | 799     |
| K03477 DeoR family transcriptional regulator, ulaG and ulaABCDEF operon transcriptional repressor               | 430     | 507     | 420     | 475     | 333     | 419     | 300     | 349     | 613     | 632     | 624     | 622     |
| K03480 transcriptional antiterminator                                                                           | 14      | 15      | 15      | 21      | 4       | 26      | 18      | 21      | 39      | 41      | 26      | 37      |
| K03481 RpiR family transcriptional regulator, glv operon transcriptional regulator                              | 48      | 35      | 53      | 59      | 35      | 46      | 18      | 34      | 68      | 90      | 63      | 85      |
| K03482 GntR family transcriptional regulator, glv operon transcriptional regulator                              | 913     | 822     | 834     | 874     | 445     | 428     | 389     | 430     | 1025    | 1186    | 1084    | 1201    |
| K03483 mannitol operon transcriptional antiterminator                                                           | 170     | 141     | 124     | 177     | 24      | 33      | 33      | 45      | 163     | 172     | 121     | 177     |
| K03484 LacI family transcriptional regulator, sucrose operon repressor                                          | 1877    | 1921    | 1864    | 1948    | 596     | 621     | 631     | 614     | 1817    | 2005    | 1937    | 1965    |
| K03485 LacI family transcriptional regulator, trehalose operon repressor                                        | 602     | 663     | 621     | 622     | 455     | 425     | 473     | 446     | 839     | 911     | 808     | 950     |
| K03486 GntR family transcriptional regulator, trehalose operon transcriptional repressor                        | 509     | 446     | 463     | 471     | 89      | 83      | 76      | 74      | 434     | 428     | 456     | 435     |
| K03487 LacI family transcriptional regulator, asc operon repressor                                              | 833     | 959     | 876     | 872     | 780     | 795     | 779     | 763     | 895     | 901     | 836     | 911     |
| K03488 beta-glucoside operon transcriptional antiterminator                                                     | 1341    | 1343    | 1304    | 1307    | 783     | 849     | 640     | 728     | 1215    | 1409    | 1253    | 1326    |
| K03489 GntR family transcriptional regulator, transcriptional regulator of bgIA                                 | 4       | 0       | 0       | 3       | 7       | 0       | 4       | 1       | 4       | 4       | 2       | 3       |
| K03490 AraC family transcriptional regulator, dual regulator of chb operon                                      | 522     | 523     | 517     | 550     | 304     | 324     | 326     | 331     | 688     | 672     | 662     | 743     |
| K03491 leichman operon transcriptional antiterminator                                                           | 706     | 659     | 752     | 671     | 106     | 111     | 99      | 94      | 518     | 729     | 623     | 640     |
| K03492 GntR family transcriptional regulator                                                                    | 429     | 494     | 458     | 446     | 355     | 360     | 326     | 302     | 575     | 601     | 611     | 617     |
| K03493 transcriptional antiterminator                                                                           | 2       | 0       | 0       | 0       | 0       | 0       | 0       | 0       | 0       | 0       | 0       | 0       |
| K03497 ParB family transcriptional regulator, chromosome partitioning protein                                   | 15665   | 15894   | 15757   | 15732   | 16344   | 16071   | 16291   | 16292   | 17335   | 17504   | 17321   | 17147   |
| K03556 LuxR family transcriptional regulator, maltose regulon positive regulatory protein                       | 7906    | 7558    | 7507    | 7853    | 4618    | 4863    | 4585    | 4834    | 6551    | 6701    | 6608    | 6660    |
| K03576 LysR family transcriptional regulator, regulator for metE and metH                                       | 1590    | 1569    | 1516    | 1598    | 967     | 933     | 849     | 928     | 1705    | 1765    | 1515    | 1662    |
| K03577 TetR/AcrR family transcriptional regulator, acrAB operon repressor                                       | 254     | 254     | 227     | 287     | 213     | 235     | 220     | 247     | 292     | 308     | 273     | 283     |
| K03603 GntR family transcriptional regulator, negative regulator for fdg regulon and positive regulator of fabA | 383     | 451     | 394     | 405     | 275     | 340     | 268     | 273     | 580     | 621     | 579     | 587     |
| K03604 LacI family transcriptional regulator, purine nucleotide synthesis repressor                             | 647     | 622     | 590     | 579     | 382     | 450     | 410     | 477     | 884     | 843     | 874     | 895     |
| K03705 heat-inducible transcriptional repressor                                                                 | 665     | 576     | 645     | 689     | 234     | 210     | 235     | 234     | 563     | 665     | 599     | 610     |
| K03706 transcriptional pleiotropic repressor                                                                    | 375     | 380     | 400     | 433     | 94      | 91      | 104     | 74      | 415     | 454     | 398     | 396     |
| K03708 transcriptional regulator of stress and heat shock response                                              | 59      | 61      | 66      | 64      | 31      | 45      | 32      | 39      | 48      | 67      | 80      | 69      |
| K03709 DtxR family transcriptional regulator, Mn-dependent transcriptional regulator                            | 31      | 44      | 37      | 48      | 16      | 5       | 9       | 7       | 41      | 62      | 50      | 44      |
| K03710 GntR family transcriptional regulator                                                                    | 2062    | 1893    | 2166    | 2014    | 2147    | 2146    | 2146    | 2076    | 2555    | 2516    | 2466    | 2615    |
| K03711 Fur family transcriptional regulator, ferric uptake regulator                                            | 1984    | 2028    | 2114    | 2121    | 2719    | 2748    | 2758    | 2728    | 2502    | 2496    | 2515    | 2459    |
| K03712 MarR family transcriptional regulator, multiple antibiotic resistance protein MarR                       | 317     | 283     | 329     | 361     | 313     | 307     | 276     | 312     | 287     | 370     | 368     | 367     |
| K03713 MerR family transcriptional regulator, glutamine synthetase repressor                                    | 16      | 14      | 26      | 23      | 4       | 4       | 5       | 10      | 17      | 39      | 26      | 19      |
| K03717 LysR family transcriptional regulator, transcriptional activator of rhaA                                 | 515     | 464     | 452     | 483     | 424     | 395     | 368     | 352     | 588     | 612     | 583     | 641     |
| K03718 Lrp/AsnC family transcriptional regulator, regulator for asnA, asnC and gidA                             | 912     | 804     | 882     | 912     | 2303    | 2351    | 2342    | 2291    | 1691    | 1681    | 1785    | 1643    |
| K03719 Lrp/AsnC family transcriptional regulator, leucine-responsive regulatory protein                         | 4752    | 4699    | 4659    | 4629    | 3543    | 3579    | 3433    | 3728    | 2945    | 2961    | 2735    | 2940    |
| K03720 TrpR family transcriptional regulator, trp operon repressor                                              | 280     | 228     | 221     | 289     | 160     | 193     | 143     | 136     | 353     | 385     | 349     | 348     |
| K03721 transcriptional regulator of aroF, aroG, tyrA and aromatic amino acid transport                          | 3259    | 3225    | 3068    | 3243    | 1801    | 1903    | 1878    | 1867    | 2029    | 1954    | 1871    | 1916    |
| K03755 AraC family transcriptional regulator, transcriptional activator of adIA                                 | 2       | 4       | 4       | 1       | 8       | 16      | 17      | 13      | 73      | 86      | 39      | 48      |
| K03764 MetI family transcriptional regulator, methionine regulon repressor                                      | 289     | 220     | 269     | 229     | 143     | 179     | 178     | 140     |         |         |         |         |

|                                                                                                                                                                       |      |      |      |      |      |      |      |      |      |      |      |      |
|-----------------------------------------------------------------------------------------------------------------------------------------------------------------------|------|------|------|------|------|------|------|------|------|------|------|------|
| K05880 transcriptional activator for dhaKLM operon                                                                                                                    | 1099 | 1168 | 1021 | 1091 | 748  | 740  | 710  | 702  | 1570 | 1670 | 1537 | 1688 |
| K06075 MarR family transcriptional regulator, transcriptional regulator for hemolysin                                                                                 | 1202 | 1224 | 1185 | 1150 | 749  | 881  | 836  | 901  | 837  | 883  | 834  | 862  |
| K06140 regulator of nucleoside diphosphate kinase                                                                                                                     | 869  | 869  | 888  | 859  | 505  | 513  | 527  | 532  | 581  | 578  | 579  | 564  |
| K06145 LacI family transcriptional regulator, gluconate utilization system Gnt-I transcriptional repressor                                                            | 946  | 846  | 819  | 983  | 781  | 782  | 804  | 701  | 940  | 993  | 943  | 988  |
| K06146 LacI family transcriptional regulator, gluconate utilization system Gnt-II transcriptional activator                                                           | 194  | 216  | 229  | 202  | 289  | 314  | 288  | 348  | 53   | 72   | 69   | 47   |
| K06283 putative DeoR family transcriptional regulator, stage III sporulation protein D                                                                                | 171  | 159  | 152  | 154  | 33   | 38   | 33   | 42   | 99   | 143  | 110  | 128  |
| K06284 AtrB family transcriptional regulator, transcriptional pleiotropic regulator of transition state genes                                                         | 36   | 27   | 45   | 30   | 21   | 27   | 34   | 23   | 21   | 27   | 23   | 24   |
| K06314 prespore-specific regulator                                                                                                                                    | 0    | 0    | 0    | 2    | 0    | 0    | 0    | 0    | 0    | 0    | 0    | 0    |
| K06599 AraC family transcriptional regulator, chemosensory pill system protein ChpD                                                                                   | 1354 | 1370 | 1297 | 1287 | 691  | 695  | 708  | 754  | 480  | 392  | 402  | 380  |
| K06608 DeoR family transcriptional regulator, myo-inositol catabolism operon repressor                                                                                | 54   | 72   | 62   | 61   | 11   | 4    | 2    | 4    | 129  | 95   | 94   | 113  |
| K06714 arginine utilization regulatory protein                                                                                                                        | 2205 | 2290 | 2324 | 2166 | 1238 | 1197 | 1210 | 1227 | 841  | 856  | 779  | 927  |
| K07110 XRE family transcriptional regulator, fatty acid utilization regulator                                                                                         | 0    | 0    | 2    | 0    | 2    | 0    | 0    | 0    | 1    | 3    | 2    | 1    |
| K07471 probable transcriptional regulator                                                                                                                             | 7    | 2    | 1    | 3    | 8    | 2    | 6    | 5    | 27   | 32   | 26   | 29   |
| K07506 AraC family transcriptional regulator                                                                                                                          | 2283 | 2435 | 2223 | 2323 | 2497 | 2490 | 2469 | 2449 | 2270 | 2133 | 2111 | 2142 |
| K07592 LysR family transcriptional regulator, tdc operon transcriptional activator                                                                                    | 337  | 326  | 344  | 355  | 123  | 107  | 78   | 99   | 784  | 697  | 761  | 788  |
| K07721 ArsR family transcriptional regulator                                                                                                                          | 0    | 0    | 0    | 0    | 0    | 2    | 1    | 0    | 4    | 13   | 0    | 2    |
| K07722 CopG family transcriptional regulator, nickel-responsive regulator                                                                                             | 313  | 316  | 291  | 332  | 241  | 256  | 234  | 248  | 402  | 435  | 420  | 432  |
| K07724 Ner family transcriptional regulator                                                                                                                           | 230  | 215  | 224  | 198  | 135  | 174  | 151  | 122  | 288  | 323  | 309  | 313  |
| K07726 putative transcriptional regulator                                                                                                                             | 375  | 392  | 386  | 348  | 204  | 196  | 236  | 231  | 555  | 534  | 540  | 600  |
| K07727 putative transcriptional regulator                                                                                                                             | 1650 | 1610 | 1691 | 1666 | 859  | 864  | 785  | 816  | 817  | 786  | 812  | 796  |
| K07728 putative transcriptional regulator                                                                                                                             | 0    | 2    | 0    | 1    | 0    | 1    | 2    | 0    | 4    | 3    | 3    | 6    |
| K07729 putative transcriptional regulator                                                                                                                             | 680  | 661  | 606  | 603  | 329  | 299  | 270  | 293  | 565  | 607  | 583  | 618  |
| K07730 putative transcriptional regulator                                                                                                                             | 0    | 0    | 0    | 1    | 0    | 0    | 1    | 1    | 1    | 11   | 3    | 7    |
| K07731 putative transcriptional regulator                                                                                                                             | 0    | 0    | 0    | 0    | 0    | 0    | 0    | 0    | 0    | 0    | 0    | 1    |
| K07733 prophage regulatory protein                                                                                                                                    | 778  | 800  | 838  | 800  | 484  | 523  | 498  | 504  | 938  | 928  | 865  | 784  |
| K07734 transcriptional regulator                                                                                                                                      | 1001 | 972  | 997  | 940  | 548  | 533  | 527  | 640  | 300  | 325  | 291  | 321  |
| K07735 putative transcriptional regulator                                                                                                                             | 1710 | 1643 | 1611 | 1638 | 2014 | 2002 | 2035 | 1907 | 1651 | 1693 | 1745 | 1657 |
| K07736 CarD family transcriptional regulator                                                                                                                          | 197  | 222  | 196  | 190  | 109  | 93   | 129  | 112  | 314  | 341  | 303  | 332  |
| K07738 transcriptional repressor NrdR                                                                                                                                 | 1386 | 1371 | 1278 | 1391 | 705  | 655  | 657  | 704  | 852  | 959  | 873  | 954  |
| K07978 GntR family transcriptional regulator                                                                                                                          | 0    | 0    | 0    | 0    | 0    | 0    | 0    | 0    | 0    | 0    | 0    | 0    |
| K07979 GntR family transcriptional regulator                                                                                                                          | 615  | 547  | 562  | 584  | 162  | 186  | 188  | 160  | 663  | 721  | 657  | 742  |
| K08277 transcriptional activator CalF                                                                                                                                 | 98   | 88   | 80   | 92   | 134  | 147  | 136  | 145  | 41   | 48   | 23   | 27   |
| K08365 MerR family transcriptional regulator, mercuric resistance operon regulatory protein                                                                           | 940  | 860  | 973  | 945  | 657  | 697  | 741  | 642  | 254  | 225  | 218  | 267  |
| K09017 TetR/AcrR family transcriptional regulator                                                                                                                     | 2680 | 2595 | 2579 | 2547 | 1491 | 1509 | 1511 | 1731 | 1198 | 1234 | 1095 | 1211 |
| K09681 LysR family transcriptional regulator, transcription activator of glutamate synthase operon                                                                    | 8    | 13   | 6    | 17   | 2    | 0    | 2    | 0    | 23   | 29   | 30   | 28   |
| K09682 MarR family transcriptional regulator, protease production regulatory protein HPr                                                                              | 0    | 0    | 0    | 1    | 0    | 0    | 0    | 0    | 0    | 0    | 0    | 0    |
| K09683 hut operon positive regulatory protein                                                                                                                         | 36   | 29   | 30   | 38   | 0    | 0    | 0    | 0    | 60   | 45   | 63   | 40   |
| K09684 PucR family transcriptional regulator, purine catabolism regulatory protein                                                                                    | 2309 | 2297 | 2247 | 2329 | 1075 | 1071 | 1027 | 1109 | 978  | 1023 | 872  | 892  |
| K09685 purine operon repressor                                                                                                                                        | 102  | 103  | 98   | 125  | 30   | 38   | 32   | 23   | 140  | 128  | 132  | 142  |
| K09720 HTH-type transcriptional regulator, global nitrogen regulator NrpRI                                                                                            | 0    | 5    | 1    | 5    | 2    | 0    | 0    | 2    | 9    | 19   | 7    | 6    |
| K09825 Fur family transcriptional regulator, peroxide stress response regulator                                                                                       | 526  | 520  | 595  | 540  | 942  | 1091 | 994  | 953  | 910  | 867  | 1021 | 900  |
| K09826 Fur family transcriptional regulator, iron response regulator                                                                                                  | 0    | 0    | 0    | 0    | 0    | 0    | 0    | 2    | 0    | 1    | 0    | 0    |
| K10711 GntR family transcriptional regulator, fliABCD operon transcriptional regulator                                                                                | 216  | 181  | 165  | 185  | 271  | 261  | 241  | 204  | 110  | 25   | 25   | 21   |
| K10718 AraC family transcriptional regulator, regulatory protein of adaptative response / methylated-DNA-[protein]-cysteine methyltransferase [EC:2.1.1.63]           | 2735 | 2835 | 2665 | 2753 | 3023 | 3153 | 3160 | 2983 | 3282 | 3094 | 3324 | 3163 |
| K10947 PadR family transcriptional regulator, regulatory protein PadR                                                                                                 | 595  | 625  | 646  | 667  | 677  | 695  | 788  | 685  | 927  | 855  | 892  | 966  |
| K10972 LysR family transcriptional regulator, transcriptional activator of the ald operon                                                                             | 3    | 1    | 1    | 15   | 13   | 14   | 12   | 39   | 51   | 40   | 38   | 55   |
| K10973 lcr family transcriptional regulator, negative regulator of allantoin and glyoxylate utilization operons                                                       | 2    | 0    | 1    | 1    | 5    | 5    | 12   | 8    | 43   | 60   | 44   | 58   |
| K11474 GntR family transcriptional regulator, glc operon transcriptional activator                                                                                    | 1331 | 1272 | 1239 | 1355 | 697  | 723  | 700  | 695  | 522  | 462  | 433  | 468  |
| K11475 GntR family transcriptional regulator, vanillate catabolism transcriptional regulator                                                                          | 1216 | 1202 | 1188 | 1210 | 675  | 698  | 644  | 732  | 403  | 392  | 322  | 425  |
| K11534 DeoR family transcriptional regulator, deoxyribose operon repressor                                                                                            | 858  | 793  | 824  | 843  | 597  | 649  | 543  | 687  | 688  | 742  | 690  | 802  |
| K11908 sigma-54 dependent transcriptional regulator                                                                                                                   | 2    | 0    | 0    | 1    | 1    | 2    | 1    | 0    | 1    | 1    | 0    | 1    |
| K11914 sigma-54 dependent transcriptional regulator                                                                                                                   | 2204 | 2156 | 1992 | 2087 | 1183 | 1171 | 1138 | 1145 | 636  | 672  | 587  | 641  |
| K11917 sigma-54 dependent transcriptional regulator                                                                                                                   | 1387 | 1339 | 1202 | 1289 | 712  | 771  | 659  | 824  | 408  | 411  | 350  | 362  |
| K11920 AraC family transcriptional regulator                                                                                                                          | 0    | 2    | 0    | 0    | 10   | 9    | 8    | 9    | 0    | 3    | 1    | 1    |
| K11921 LysR family transcriptional regulator, cys operon transcriptional activator                                                                                    | 1490 | 1403 | 1367 | 1450 | 671  | 672  | 626  | 731  | 1051 | 1017 | 1000 | 1073 |
| K11922 GntR family transcriptional regulator, mannosyl-D-glycerate transport/metabolism system repressor                                                              | 3    | 13   | 12   | 9    | 14   | 32   | 24   | 29   | 11   | 9    | 16   | 9    |
| K11924 DtxR family transcriptional regulator, manganese transport regulator                                                                                           | 267  | 238  | 269  | 291  | 177  | 218  | 187  | 169  | 356  | 413  | 333  | 408  |
| K11925 SgrR family transcriptional regulator                                                                                                                          | 977  | 1097 | 997  | 1046 | 722  | 777  | 704  | 763  | 1284 | 1509 | 1336 | 1456 |
| K11926 sigma factor-binding protein Crl                                                                                                                               | 201  | 203  | 231  | 216  | 134  | 172  | 135  | 163  | 311  | 343  | 328  | 321  |
| K12113 LacI family transcriptional regulator, ebg operon repressor                                                                                                    | 2    | 5    | 2    | 4    | 16   | 16   | 14   | 7    | 57   | 57   | 78   | 55   |
| K12146 hydrogenase-4 transcriptional activator                                                                                                                        | 362  | 356  | 389  | 385  | 594  | 663  | 554  | 597  | 4    | 2    | 3    | 2    |
| K12243 AraC family transcriptional regulator, transcriptional activator of the genes for pyochelin and ferripyochelin receptors                                       | 1694 | 1614 | 1363 | 1358 | 812  | 723  | 705  | 851  | 489  | 431  | 406  | 439  |
| K13530 AraC family transcriptional regulator, regulatory protein of adaptative response / methylphosphotriester-DNA alkyltransferase methyltransferase [EC 3.1.39.37] | 31   | 39   | 37   | 27   | 5    | 5    | 4    | 3    | 25   | 50   | 34   | 39   |
| K13631 AraC family transcriptional regulator, mar-sox-rob regulon activator                                                                                           | 425  | 415  | 406  | 405  | 285  | 307  | 295  | 299  | 601  | 707  | 634  | 543  |
| K13633 AraC family transcriptional regulator, transcriptional activator FtrA                                                                                          | 552  | 509  | 518  | 496  | 372  | 329  | 308  | 356  | 712  | 767  | 715  | 745  |
| K13634 LysR family transcriptional regulator, cys regulon transcriptional activator                                                                                   | 1743 | 1650 | 1649 | 1647 | 1023 | 975  | 1027 | 959  | 1086 | 1240 | 1135 | 1152 |
| K13635 LysR family transcriptional regulator, cys regulon transcriptional activator                                                                                   | 542  | 604  | 563  | 538  | 370  | 424  | 406  | 378  | 771  | 850  | 799  | 796  |
| K13636 LysR family transcriptional regulator, D-serine deaminase activator                                                                                            | 951  | 1001 | 915  | 931  | 483  | 628  | 516  | 562  | 1407 | 1467 | 1399 | 1549 |
| K13637 GntR family transcriptional regulator, uxa operon transcriptional repressor                                                                                    | 411  | 387  | 385  | 457  | 294  | 347  | 322  | 326  | 568  | 579  | 586  | 533  |
| K13638 MerR family transcriptional regulator, Zn(II)-responsive regulator of zntA                                                                                     | 273  | 243  | 283  | 294  | 188  | 202  | 210  | 193  | 379  | 372  | 400  | 385  |
| K13639 MerR family transcriptional regulator, redox-sensitive transcriptional activator SoxR                                                                          | 430  | 442  | 467  | 464  | 321  | 311  | 301  | 301  | 441  | 422  | 431  | 436  |
| K13640 MerR family transcriptional regulator, heat shock protein HspR                                                                                                 | 8    | 4    | 6    | 2    | 2    | 1    | 3    | 5    | 9    | 7    | 8    | 9    |
| K13641 lcr family transcriptional regulator, acetate operon repressor                                                                                                 | 549  | 564  | 536  | 596  | 324  | 401  | 437  | 373  | 729  | 780  | 796  | 760  |
| K13642 CRP/FNR family transcriptional regulator, transcriptional activator FtrB                                                                                       | 0    | 0    | 0    | 0    | 0    | 0    | 0    | 0    | 2    | 2    | 0    | 0    |
| K13643 Rrf2 family transcriptional regulator, iron-sulfur cluster assembly transcription factor                                                                       | 1029 | 1074 | 1121 | 1060 | 628  | 673  | 639  | 662  | 684  | 671  | 680  | 689  |
| K13652 AraC family transcriptional regulator                                                                                                                          | 1440 | 1448 | 1529 | 1406 | 2899 | 2870 | 2959 | 3080 | 2712 | 2637 | 2795 | 2586 |
| K13653 AraC family transcriptional regulator                                                                                                                          | 2752 | 2527 | 2769 | 2701 | 622  | 631  | 636  | 503  | 3002 | 3142 | 2975 | 3238 |
| K13654 GntR family transcriptional regulator, colanic acid and biofilm gene transcriptional regulator                                                                 | 108  | 124  | 118  | 98   | 183  | 159  | 183  | 166  | 9    | 11   | 8    | 11   |
| K13655 HTH-type transcriptional regulator / antitoxin MqsA                                                                                                            | 1    | 0    | 0    | 3    | 0    | 0    | 0    | 2    | 0    | 0    | 0    | 0    |
| K13770 TetR/AcrR family transcriptional regulator, fatty acid metabolism regulator protein                                                                            | 0    | 0    | 0    | 0    | 2    | 1    | 3    | 1    | 0    | 1    | 0    | 0    |
| K13772 Rrf2 family transcriptional regulator, iron-responsive regulator                                                                                               | 0    | 0    | 0    | 1    | 0    | 0    | 0    | 0    | 0    | 2    | 0    | 2    |
| K13794 LysR family transcriptional regulator, regulatory protein for tcaABC                                                                                           | 1    | 4    | 0    | 1    | 2    | 5    | 5    | 2    | 2    | 0    | 1    | 2    |
| K13928 LysR family transcriptional regulator, malonate utilization transcriptional regulator                                                                          | 2058 | 2132 | 1855 | 1914 | 1156 | 1164 | 1100 | 1190 | 1110 | 1072 | 1034 | 1115 |
| K14056 HTH-type transcriptional regulator, repressor for pudB                                                                                                         | 158  | 184  | 197  | 192  | 46   | 49   | 46   | 52   | 422  | 443  | 401  | 360  |
| K14057 LysR family transcriptional regulator, regulator of abg operon                                                                                                 | 285  | 255  | 275  | 304  | 89   | 69   | 62   | 87   | 626  | 601  | 524  | 567  |
| K14063 AraC family transcriptional regulator, positive regulator of tynA and feaB                                                                                     | 364  | 409  | 364  | 415  | 111  | 101  | 93   | 109  | 755  | 753  | 628  | 794  |
| K14348 GntR family transcriptional regulator, L-lactate dehydrogenase operon regulator                                                                                | 514  | 523  | 473  | 525  | 383  | 393  | 414  | 386  | 707  | 710  | 775  | 750  |
| K14414 transcriptional regulatory protein RtcR                                                                                                                        | 3081 | 2907 | 2952 | 2869 | 2046 | 2024 | 2123 | 2023 | 922  | 899  | 870  | 908  |
| K15545 transcriptional regulator of PTS gene                                                                                                                          | 624  | 713  | 682  | 710  | 466  | 511  | 452  | 453  | 944  | 937  | 928  | 966  |
| K15546 XRE family transcriptional regulator, aerobic/anaerobic benzoate catabolism transcriptional regulator                                                          | 0    | 0    | 0    | 0    | 0    | 0    | 0    | 0    | 1    | 3    | 1    | 0    |
| K15735 GntR family transcriptional regulator, carbon starvation induced regulator                                                                                     | 291  | 246  | 270  | 292  | 82   | 83   | 82   | 87   | 631  | 556  | 540  | 551  |
| K15773 HTH-type transcriptional regulator / antitoxin HipB                                                                                                            | 104  | 93   | 86   | 110  | 24   | 32   | 29   | 25   | 230  | 208  | 220  | 242  |
| K15782 Lrp/AsnC family transcriptional regulator, regulator of ectoine-degradation genes                                                                              | 0    | 0    | 0    | 1    | 0    | 0    | 0    | 0    | 0    | 0    | 3    | 0    |
| K15835 RpiR family transcriptional regulator, murPQ operon repressor                                                                                                  | 0    | 1    | 0    | 0    | 12   | 4    | 12   | 10   | 4    | 4    | 7    | 6    |
| K15826 formate hydrogenlyase transcriptional activator                                                                                                                | 799  | 820  | 848  | 831  | 249  | 255  | 253  | 244  | 1875 | 1788 | 1830 | 1844 |
| K15973 MarR family transcriptional regulator, 2-MHQ and catechol-resistance regulon repressor                                                                         | 15   | 26   | 22   | 21   | 3    | 4    | 1    | 7    | 17   | 27   | 15   | 21   |
| K15974 MarR family transcriptional regulator, negative regulator of the multidrug operon emrAB                                                                        | 303  | 287  | 284  | 359  | 245  | 224  | 259  | 232  | 357  | 479  | 399  | 491  |
| K16135 LysR family transcriptional regulator, transcriptional activator for dmIA                                                                                      | 340  | 302  | 325  | 347  | 86   | 93   | 102  | 93   | 691  | 658  | 669  | 794  |
| K16136 LacI family transcriptional regulator, maltose regulon regulatory protein                                                                                      | 510  | 526  | 475  | 531  | 350  | 448  | 395  | 348  | 648  | 678  | 622  | 651  |
| K16137 TetR/AcrR family transcriptional regulator, transcriptional repressor for nem operon                                                                           | 2816 | 2808 | 2603 | 2828 | 1539 | 1488 | 1469 | 1676 | 1666 | 1636 | 1537 | 1655 |
| K16138 TetR/AcrR family transcriptional regulator, repressor for uid operon                                                                                           | 93   | 95   | 97   | 89   | 47   | 33   | 34   | 47   | 291  | 277  | 264  | 300  |
| K16326 CRP/FNR family transcriptional regulator, putative post-exponential-phase nitrogen-starvation regulator                                                        | 82   | 108  | 102  | 81   | 154  | 151  | 160  | 152  | 55   | 36   | 46   | 35   |
| K16516 LysR family transcriptional regulator, regulator for genes of the gallate degradation pathway                                                                  | 539  | 546  | 459  | 542  | 160  | 143  | 165  | 163  | 1019 | 1031 | 900  | 1061 |
| K17472 Rrf2 family transcriptional regulator, cysteine metabolism repressor                                                                                           | 0    | 0    | 0    | 0    | 0    | 0    | 0    | 0    | 3    | 2    | 3    | 5    |
| K17473 sigma-54 dependent transcriptional regulator, dga operon transcriptional activator                                                                             | 146  | 150  | 157  |      |      |      |      |      |      |      |      |      |

|                                                                                                                       |       |       |       |       |       |        |        |       |       |       |       |       |
|-----------------------------------------------------------------------------------------------------------------------|-------|-------|-------|-------|-------|--------|--------|-------|-------|-------|-------|-------|
| K18954 AraC family transcriptional regulator, transcriptional activator of pobaA                                      | 1636  | 1678  | 1646  | 1698  | 1068  | 995    | 958    | 1004  | 1139  | 1024  | 1027  | 1111  |
| K18955 WhiB family transcriptional regulator, redox-sensing transcriptional regulator                                 | 0     | 0     | 5     | 5     | 0     | 2      | 1      | 0     | 8     | 4     | 3     | 5     |
| K18991 AraC family transcriptional regulator, activator of mtrCDE                                                     | 2147  | 2092  | 2058  | 2063  | 1157  | 1247   | 1101   | 1235  | 1226  | 1255  | 1218  | 1254  |
| K19057 MerR family transcriptional regulator, mercuric resistance operon regulatory protein                           | 735   | 698   | 748   | 757   | 518   | 535    | 545    | 497   | 202   | 156   | 162   | 170   |
| K19242 LysR family transcriptional regulator, repressor for cItA                                                      | 36    | 32    | 33    | 35    | 5     | 4      | 2      | 3     | 66    | 57    | 76    | 70    |
| K19333 IcR family transcriptional regulator, KDG regulon repressor                                                    | 604   | 566   | 528   | 578   | 405   | 318    | 276    | 321   | 728   | 710   | 693   | 743   |
| K19335 TetR/AcrR family transcriptional regulator, repressor for divergent bdcA                                       | 171   | 199   | 211   | 215   | 57    | 49     | 40     | 52    | 349   | 389   | 394   | 439   |
| K19337 RpiR family transcriptional regulator, carbohydrate utilization regulator                                      | 2487  | 2482  | 2446  | 2409  | 1462  | 1504   | 1405   | 1444  | 1361  | 1258  | 1208  | 1338  |
| K19338 LysR family transcriptional regulator, nitrogen assimilation regulatory protein                                | 598   | 612   | 559   | 589   | 397   | 428    | 397    | 355   | 786   | 839   | 752   | 865   |
| K19339 NosR/NirI family transcriptional regulator, nitrous oxide reductase regulator                                  | 17    | 11    | 20    | 24    | 11    | 23     | 6      | 7     | 10    | 14    | 16    | 17    |
| K19449 XRE family transcriptional regulator, master regulator for biofilm formation                                   | 3     | 0     | 6     | 3     | 0     | 0      | 2      | 0     | 11    | 12    | 15    | 13    |
| K19505 sigma-54 dependent transcriptional regulator, gfr operon transcriptional activator                             | 1226  | 1318  | 1189  | 1235  | 348   | 389    | 363    | 329   | 2257  | 2398  | 2388  | 2390  |
| K19575 MerR family transcriptional regulator, activator of bmx gene                                                   | 4     | 3     | 11    | 8     | 0     | 0      | 1      | 1     | 3     | 4     | 3     | 1     |
| K19587 Rrf2 family transcriptional regulator, repressor of oxaAB                                                      | 309   | 301   | 262   | 321   | 200   | 222    | 181    | 181   | 418   | 374   | 373   | 423   |
| K19591 MerR family transcriptional regulator, copper efflux regulator                                                 | 883   | 924   | 823   | 891   | 564   | 507    | 515    | 551   | 558   | 589   | 553   | 522   |
| K19592 MerR family transcriptional regulator, gold-responsive activator of gol and ges genes                          | 0     | 0     | 0     | 0     | 0     | 0      | 3      | 2     | 0     | 2     | 3     | 1     |
| K19736 TetR/AcrR family transcriptional regulator, regulator of autoinduction and epiphytic fitness                   | 0     | 0     | 0     | 0     | 0     | 1      | 0      | 0     | 0     | 0     | 1     | 0     |
| K19775 GntR family transcriptional regulator, hexuronate regulon transcriptional repressor                            | 389   | 421   | 397   | 395   | 343   | 376    | 345    | 325   | 509   | 514   | 541   | 629   |
| K19776 GntR family transcriptional regulator, galactonate operon transcriptional repressor                            | 459   | 399   | 391   | 417   | 335   | 351    | 332    | 280   | 648   | 680   | 597   | 637   |
| K21405 sigma-54 dependent transcriptional regulator, acetoin dehydrogenase operon transcriptional activator AcoR      | 5752  | 5607  | 5087  | 5380  | 2951  | 2989   | 2833   | 3226  | 3039  | 3090  | 2870  | 2998  |
| K21555 CRP/FNR family transcriptional regulator, carbon monoxide oxidation system transcription regulator             | 3     | 2     | 5     | 7     | 3     | 4      | 4      | 2     | 4     | 24    | 7     | 6     |
| K21556 CRP/FNR family transcriptional regulator, polysaccharide utilization system transcription regulator            | 400   | 442   | 459   | 449   | 1511  | 1418   | 1504   | 1403  | 1017  | 1073  | 1108  | 987   |
| K21557 HTH-type transcriptional regulator, polysaccharide utilization system transcription regulator                  | 963   | 1144  | 1196  | 1033  | 3593  | 3511   | 3602   | 3562  | 2633  | 2385  | 2519  | 2414  |
| K21562 CRP/FNR family transcriptional regulator, anaerobic regulatory protein                                         | 4     | 2     | 8     | 11    | 20    | 17     | 10     | 17    | 25    | 37    | 31    | 30    |
| K21563 CRP/FNR family transcriptional regulator, dissimilatory nitrate respiration regulator                          | 463   | 437   | 409   | 390   | 245   | 227    | 210    | 254   | 143   | 108   | 102   | 120   |
| K21564 CRP/FNR family transcriptional regulator, nitrogen oxide reductase regulator                                   | 2     | 2     | 2     | 0     | 0     | 0      | 0      | 0     | 0     | 0     | 0     | 2     |
| K21600 CsoR family transcriptional regulator, copper-sensing transcriptional repressor                                | 163   | 189   | 152   | 167   | 95    | 93     | 84     | 109   | 219   | 270   | 240   | 254   |
| K21602 IcR family transcriptional regulator, carbohydrate utilization repressor                                       | 216   | 196   | 232   | 205   | 302   | 317    | 291    | 310   | 129   | 114   | 120   | 133   |
| K21645 LysR family transcriptional regulator, hypochlorite-specific transcription factor HytP                         | 569   | 574   | 557   | 560   | 240   | 268    | 252    | 260   | 761   | 834   | 717   | 817   |
| K21686 XRE family transcriptional regulator, fatty acid utilization regulator                                         | 2     | 0     | 0     | 0     | 2     | 2      | 0      | 0     | 0     | 4     | 7     | 2     |
| K21697 LuxR family transcriptional regulator, quorum-sensing system regulator VjbR                                    | 2     | 0     | 0     | 3     | 0     | 0      | 0      | 0     | 1     | 4     | 3     | 0     |
| K21698 LysR family transcriptional regulator, transcriptional activator for aaeXAB operon                             | 654   | 569   | 597   | 550   | 405   | 443    | 465    | 430   | 779   | 767   | 789   | 831   |
| K21699 LysR family transcriptional regulator, transcriptional activator for bauABCD operon                            | 1574  | 1559  | 1439  | 1481  | 865   | 879    | 793    | 902   | 497   | 495   | 436   | 447   |
| K21701 AraC family transcriptional regulator, transcriptional activator for feaABC-ybbA operon                        | 36    | 35    | 42    | 35    | 8     | 5      | 8      | 10    | 39    | 61    | 33    | 47    |
| K21703 LysR family transcriptional regulator, low CO2-responsive transcriptional regulator                            | 1     | 1     | 2     | 1     | 0     | 0      | 0      | 0     | 1     | 0     | 2     | 2     |
| K21711 LysR family transcriptional regulator, putative pyruvate carboxylase regulator                                 | 1531  | 1623  | 1536  | 1638  | 926   | 874    | 869    | 982   | 551   | 468   | 536   | 550   |
| K21742 LysR family transcriptional regulator, transcriptional activator for ttdABT operon                             | 1     | 5     | 5     | 3     | 14    | 12     | 29     | 5     | 51    | 62    | 47    | 58    |
| K21743 MerR family transcriptional regulator, multidrug-efflux activator                                              | 2     | 2     | 2     | 1     | 0     | 0      | 0      | 4     | 3     | 2     | 1     | 1     |
| K21744 MerR family transcriptional regulator, thiopetide resistance regulator                                         | 8     | 5     | 3     | 2     | 1     | 0      | 1      | 1     | 7     | 3     | 9     | 5     |
| K21745 MerR family transcriptional regulator, aldehyde-responsive regulator                                           | 2     | 1     | 6     | 2     | 0     | 0      | 0      | 0     | 3     | 2     | 8     | 6     |
| K21746 AraC family transcriptional regulator, reactive chlorine species (RCS)-specific activator of rcd operon        | 104   | 94    | 126   | 105   | 41    | 29     | 55     | 40    | 125   | 163   | 143   | 184   |
| K21755 LysR family transcriptional regulator, salicylic acid-responsive activator of bsdBCD                           | 171   | 185   | 186   | 191   | 289   | 299    | 284    | 298   | 5     | 6     | 16    | 10    |
| K21757 LysR family transcriptional regulator, benzoate and cis,cis-muconate-responsive activator of ben and cat genes | 1013  | 1029  | 897   | 1028  | 549   | 441    | 522    | 602   | 346   | 335   | 277   | 321   |
| K21825 AraC family transcriptional regulator, L-arginine-responsive activator                                         | 1454  | 1494  | 1451  | 1452  | 851   | 778    | 675    | 859   | 486   | 456   | 417   | 410   |
| K21826 AraC family transcriptional regulator, glycine betaine-responsive activator                                    | 1634  | 1675  | 1498  | 1590  | 872   | 917    | 769    | 943   | 550   | 462   | 492   | 512   |
| K21828 CRP/FNR family transcriptional regulator, arginine deiminase pathway regulator                                 | 39    | 45    | 37    | 49    | 21    | 15     | 8      | 17    | 43    | 49    | 49    | 49    |
| K21829 D-arginine utilization repressor                                                                               | 877   | 929   | 956   | 927   | 529   | 461    | 447    | 536   | 314   | 294   | 272   | 282   |
| K21885 ArsR family transcriptional regulator, cadmium/lead-responsive transcriptional repressor                       | 0     | 0     | 0     | 0     | 0     | 0      | 0      | 0     | 1     | 1     | 1     | 0     |
| K21900 LysR family transcriptional regulator, transcriptional activator of the cysII operon                           | 31    | 23    | 42    | 31    | 2     | 4      | 2      | 9     | 47    | 60    | 35    | 54    |
| K21901 LuxR family transcriptional regulator, dicarboxylate transport regulator                                       | 4     | 5     | 2     | 5     | 4     | 5      | 2      | 4     | 31    | 51    | 39    | 32    |
| K21903 ArsR family transcriptional regulator, lead/cadmium/zinc/bismuth-responsive transcriptional repressor          | 197   | 185   | 187   | 187   | 100   | 103    | 119    | 123   | 220   | 210   | 177   | 187   |
| K21905 AraC family transcriptional regulator, glutamate-dependent acid resistance regulator                           | 1     | 1     | 4     | 1     | 10    | 15     | 5      | 4     | 47    | 41    | 31    | 30    |
| K21906 AraC family transcriptional regulator, glutamate-dependent acid resistance regulator                           | 0     | 0     | 2     | 1     | 11    | 9      | 5      | 10    | 64    | 68    | 42    | 57    |
| K21907 LuxR family transcriptional regulator, glutamate-dependent acid resistance regulator                           | 1     | 2     | 2     | 0     | 9     | 1      | 11     | 5     | 23    | 28    | 40    | 34    |
| K21959 LysR family transcriptional regulator, cell division regulator                                                 | 1     | 2     | 2     | 2     | 0     | 0      | 1      | 0     | 0     | 0     | 0     | 0     |
| K21960 LysR family transcriptional regulator, regulator of the ytmI operon                                            | 0     | 2     | 3     | 3     | 0     | 0      | 1      | 0     | 0     | 2     | 4     | 0     |
| K21961 TetR/AcrR family transcriptional regulator, ethionamide resistance regulator                                   | 107   | 117   | 101   | 102   | 0     | 4      | 0      | 0     | 59    | 62    | 77    | 74    |
| K21963 LuxR family transcriptional regulator, Mat/Ecp fimbriae transcriptional regulator                              | 106   | 114   | 104   | 104   | 37    | 32     | 35     | 51    | 243   | 224   | 210   | 266   |
| K21972 MerR family transcriptional regulator, repressor of blue light- and temperature-responsive genes               | 436   | 369   | 387   | 442   | 348   | 342    | 328    | 282   | 572   | 583   | 559   | 567   |
| K22011 TetR/AcrR family transcriptional regulator, copper-responsive repressor                                        | 338   | 370   | 338   | 358   | 228   | 257    | 291    | 240   | 521   | 626   | 596   | 626   |
| K22103 AraC family transcriptional regulator, zinc-responsive transcriptional repressor                               | 21    | 18    | 8     | 17    | 10    | 9      | 8      | 8     | 21    | 25    | 34    | 27    |
| K22103 DeoR family transcriptional regulator, carbon catabolite repression regulator                                  | 49    | 40    | 44    | 45    | 3     | 15     | 15     | 7     | 47    | 40    | 50    | 36    |
| K22104 GntR family transcriptional regulator, salic acid-inducible nan operon repressor                               | 225   | 178   | 185   | 209   | 261   | 261    | 250    | 267   | 67    | 64    | 75    | 74    |
| K22105 TetR/AcrR family transcriptional regulator, fatty acid biosynthesis regulator                                  | 440   | 451   | 406   | 447   | 309   | 371    | 337    | 313   | 596   | 592   | 591   | 581   |
| K22106 TetR/AcrR family transcriptional regulator, repressor of fatR-cybB operon                                      | 11    | 23    | 12    | 7     | 8     | 21     | 10     | 4     | 7     | 29    | 26    | 34    |
| K22108 TetR/AcrR family transcriptional regulator, cholesterol catabolism regulator                                   | 7     | 2     | 2     | 4     | 2     | 7      | 3      | 3     | 17    | 17    | 18    | 13    |
| K22293 GntR family transcriptional regulator, rspAB operon transcriptional repressor                                  | 491   | 540   | 528   | 516   | 277   | 276    | 273    | 245   | 594   | 617   | 627   | 577   |
| K22296 MarR family transcriptional regulator, lower aerobic nicotinate degradation pathway regulator                  | 639   | 660   | 636   | 621   | 310   | 295    | 286    | 317   | 176   | 158   | 202   | 175   |
| K22299 HTH-type transcriptional regulator, competence development regulator                                           | 1     | 1     | 0     | 1     | 0     | 0      | 0      | 0     | 1     | 1     | 0     | 4     |
| K22300 HTH-type transcriptional regulator, cell division transcriptional repressor                                    | 73    | 51    | 38    | 87    | 93    | 110    | 103    | 108   | 2     | 4     | 1     | 0     |
| K22302 transcriptional repressor of cell division inhibition gene dicB                                                | 54    | 61    | 59    | 58    | 73    | 76     | 87     | 73    | 6     | 13    | 10    | 12    |
| K22486 transcriptional regulator HliA, main transcriptional regulator of SPI1                                         | 0     | 0     | 0     | 0     | 14    | 7      | 24     | 16    | 7     | 2     | 5     | 4     |
| K22489 MarR family transcriptional regulator, temperature-dependent positive regulator of motility                    | 264   | 266   | 242   | 243   | 146   | 195    | 174    | 184   | 261   | 356   | 309   | 325   |
| K22491 MerR family transcriptional regulator, light-induced transcriptional regulator                                 | 1562  | 1494  | 1423  | 1382  | 828   | 789    | 719    | 868   | 451   | 430   | 423   | 420   |
| K22650 LuxR family transcriptional regulator, regulator of transport and utilization of aryl beta-glucosides          | 376   | 417   | 387   | 427   | 309   | 289    | 331    | 288   | 539   | 556   | 538   | 615   |
| K23015 GntR family transcriptional regulator, transcriptional activator for L-galactonate catabolism                  | 226   | 253   | 202   | 216   | 277   | 304    | 301    | 273   | 47    | 49    | 64    | 57    |
| K23237 AraC family transcriptional regulator, melibiose operon regulatory protein                                     | 383   | 424   | 318   | 418   | 115   | 129    | 111    | 99    | 845   | 923   | 815   | 913   |
| K23238 RpiR family transcriptional regulator, repressor of rpiB and als operon                                        | 2     | 6     | 6     | 8     | 6     | 3      | 3      | 3     | 50    | 70    | 58    | 68    |
| K23239 FmrR/RcnR family transcriptional regulator, repressor of fmrAB operon                                          | 188   | 157   | 157   | 177   | 89    | 131    | 94     | 114   | 211   | 221   | 186   | 200   |
| K23240 FmrR/RcnR family transcriptional regulator, repressor of rcnA expression                                       | 152   | 188   | 193   | 182   | 143   | 105    | 129    | 96    | 264   | 236   | 278   | 254   |
| K23253 PucR family transcriptional regulator, proline-responsive transcriptional activator                            | 0     | 1     | 0     | 0     | 0     | 0      | 0      | 0     | 4     | 1     | 0     | 3     |
| K23256 HTH-type transcriptional regulator, sugar sensing transcriptional regulator                                    | 100   | 85    | 99    | 96    | 14    | 14     | 5      | 1     | 134   | 134   | 177   | 149   |
| ko03021 Transcription machinery                                                                                       | 91360 | 91530 | 92565 | 91532 | 99939 | 100209 | 100092 | 99903 | 93164 | 93260 | 93398 | 91380 |
| K02600 transcription termination/antitermination protein NusA                                                         | 3852  | 3876  | 4055  | 3982  | 4996  | 5027   | 5018   | 4994  | 4688  | 4834  | 4430  | 4619  |
| K02601 transcription termination/antitermination protein NusG                                                         | 1699  | 1740  | 1750  | 1844  | 2017  | 1937   | 2063   | 1895  | 1895  | 2097  | 2048  | 1954  |
| K03057 transcription factor S                                                                                         | 0     | 0     | 0     | 0     | 2     | 0      | 0      | 1     | 3     | 1     | 3     | 4     |
| K03086 RNA polymerase primary sigma factor                                                                            | 4796  | 4817  | 4923  | 4757  | 4180  | 4189   | 3963   | 3918  | 5070  | 5076  | 5251  | 5143  |
| K03088 RNA polymerase sigma-70 factor, ECF subfamily                                                                  | 10471 | 10767 | 11039 | 10236 | 19908 | 19856  | 20345  | 20347 | 14507 | 13399 | 14524 | 13727 |
| K03089 RNA polymerase sigma-32 factor                                                                                 | 2116  | 1990  | 2008  | 1957  | 1295  | 1174   | 1166   | 1295  | 1234  | 1216  | 1223  | 1243  |
| K03090 RNA polymerase sigma-B factor                                                                                  | 9     | 11    | 19    | 17    | 10    | 18     | 23     | 9     | 22    | 25    | 13    | 26    |
| K03091 RNA polymerase sporulation-specific sigma factor                                                               | 1368  | 1381  | 1413  | 1465  | 440   | 513    | 549    | 463   | 1341  | 1642  | 1383  | 1469  |
| K03093 RNA polymerase sigma factor                                                                                    | 15    | 21    | 16    | 20    | 6     | 2      | 3      | 2     | 15    | 16    | 13    | 14    |
| K03580 ATP-dependent helicase HepA [EC:3.6.4.-]                                                                       | 5931  | 5578  | 5652  | 5672  | 3367  | 3250   | 3305   | 3401  | 3801  | 3939  | 3582  | 3725  |
| K03597 sigma-E factor negative regulatory protein RseA                                                                | 1367  | 1357  | 1251  | 1286  | 825   | 849    | 753    | 801   | 862   | 885   | 745   | 818   |
| K03598 sigma-E factor negative regulatory protein RseB                                                                | 1815  | 1772  | 1773  | 1862  | 1129  | 1112   | 1076   | 1139  | 1118  | 1136  | 1112  | 1136  |
| K03599 stringent starvation protein A                                                                                 | 627   | 650   | 684   | 619   | 433   | 480    | 485    | 490   | 623   | 644   | 605   | 619   |
| K03600 stringent starvation protein B                                                                                 | 909   | 870   | 854   | 929   | 597   | 570    | 540    | 480   | 584   | 631   | 612   | 636   |
| K03624 transcription elongation factor GreA                                                                           | 1361  | 1416  | 1469  | 1489  | 1704  | 1734   | 1819   | 1771  | 1903  | 2010  | 1963  | 1927  |
| K03625 transcription antitermination protein NusB                                                                     | 1827  | 1955  | 1773  | 1809  | 2594  | 2555   | 2623   | 2622  | 2472  | 2152  | 2232  | 2204  |
| K03803 sigma-E factor negative regulatory protein RseC                                                                | 1193  | 1252  | 1206  | 1194  | 1374  | 1356   | 1318   | 1361  | 1118  | 1300  | 1176  | 1128  |
| K04749 anti-sigma B factor antagonist                                                                                 | 28    | 14    | 23    | 19    | 7     | 6      | 7      | 6     | 7     | 15    | 10    | 17    |
| K04760 transcription elongation factor GreB                                                                           | 1196  | 1112  | 1079  | 1057  | 655   | 678    | 655    | 604   | 739   | 715   | 687   | 803   |
| K07315 phosphoserine phosphatase RsbU/P [EC:3.1.3.3]                                                                  | 314   | 301   | 294   | 310   | 104   | 74     | 73     | 93    | 253   | 245   | 212   | 273   |
| K11367 chromodomain-helicase-DNA-binding protein 1 [EC:3.6.4.12]                                                      | 0     | 0     | 0     | 2     | 0     | 0      |        |       |       |       |       |       |

|                                                                                                                 |        |        |        |        |        |        |        |        |        |        |        |        |
|-----------------------------------------------------------------------------------------------------------------|--------|--------|--------|--------|--------|--------|--------|--------|--------|--------|--------|--------|
| ko03011 Ribosome                                                                                                | 78384  | 79588  | 82698  | 81135  | 88612  | 88928  | 90151  | 86988  | 84998  | 85396  | 85577  | 85767  |
| K17437 large subunit ribosomal protein L15                                                                      | 0      | 2      | 0      | 0      | 0      | 0      | 0      | 0      | 0      | 0      | 0      | 0      |
| ko03009 Ribosome biogenesis                                                                                     | 156988 | 157286 | 156854 | 157650 | 151246 | 152400 | 152627 | 152332 | 156586 | 157365 | 155923 | 156824 |
| K00561 23S rRNA (adenine-N6)-dimethyltransferase [EC:2.1.1.184]                                                 | 387    | 525    | 544    | 531    | 1488   | 1520   | 1652   | 1535   | 1109   | 1014   | 1086   | 1057   |
| K00563 23S rRNA (guanine745-N1)-methyltransferase [EC:2.1.1.187]                                                | 1715   | 1771   | 1581   | 1725   | 1103   | 1081   | 962    | 1076   | 1131   | 1173   | 1109   | 1027   |
| K00564 16S rRNA (guanine1207-N2)-methyltransferase [EC:2.1.1.172]                                               | 2307   | 2357   | 2243   | 2350   | 1472   | 1287   | 1285   | 1411   | 1444   | 1447   | 1446   | 1554   |
| K00783 23S rRNA (pseudouridine1915-N3)-methyltransferase [EC:2.1.1.177]                                         | 1706   | 1733   | 1758   | 1731   | 1843   | 1790   | 1747   | 1937   | 1801   | 1795   | 1750   | 1732   |
| K02427 23S rRNA (uridine2552-2'-O)-methyltransferase [EC:2.1.1.166]                                             | 1198   | 1119   | 1212   | 1206   | 791    | 820    | 765    | 800    | 883    | 905    | 838    | 904    |
| K02528 16S rRNA (adenine1518-N6)/adenine1519-N6)-dimethyltransferase [EC:2.1.1.182]                             | 2840   | 2744   | 2843   | 2791   | 2884   | 2887   | 2986   | 2976   | 2859   | 2919   | 2871   | 2888   |
| K02687 ribosomal protein L11 methyltransferase [EC:2.1.1.-]                                                     | 3044   | 3116   | 3033   | 2853   | 2949   | 3191   | 3011   | 2864   | 2822   | 3033   | 2822   | 2906   |
| K02834 ribosome-binding factor A                                                                                | 1415   | 1372   | 1395   | 1364   | 1406   | 1428   | 1422   | 1405   | 1434   | 1519   | 1452   | 1430   |
| K02860 16S rRNA processing protein RimM                                                                         | 1894   | 1769   | 1911   | 1727   | 1912   | 1957   | 2016   | 1936   | 1810   | 1803   | 1780   | 1895   |
| K02972 stationary phase-induced ribosome-associated protein                                                     | 83     | 100    | 72     | 99     | 54     | 60     | 75     | 64     | 114    | 115    | 141    | 136    |
| K03212 23S rRNA (uracil747-C5)-methyltransferase [EC:2.1.1.189]                                                 | 667    | 660    | 627    | 634    | 388    | 396    | 420    | 410    | 898    | 914    | 864    | 861    |
| K03214 RNA methyltransferase, TrmH family [EC:2.1.1.-]                                                          | 603    | 602    | 632    | 619    | 444    | 438    | 490    | 467    | 852    | 921    | 819    | 912    |
| K03215 23S rRNA (uracil1939-C5)-methyltransferase [EC:2.1.1.190]                                                | 3738   | 3895   | 3815   | 3824   | 2919   | 2987   | 2903   | 2860   | 3392   | 3412   | 3256   | 3518   |
| K03218 23S rRNA (guanosine2251-2'-O)-methyltransferase [EC:2.1.1.185]                                           | 2222   | 2177   | 2222   | 2212   | 2608   | 2628   | 2459   | 2465   | 2464   | 2569   | 2542   | 2530   |
| K03438 16S rRNA (cytosine1402-N4)-methyltransferase [EC:2.1.1.199]                                              | 3676   | 3332   | 3688   | 3503   | 3563   | 3629   | 3523   | 3542   | 3202   | 3291   | 3425   | 3279   |
| K03500 16S rRNA (cytosine967-C5)-methyltransferase [EC:2.1.1.176]                                               | 3831   | 3714   | 3490   | 3820   | 2201   | 2162   | 2065   | 2225   | 2557   | 2671   | 2748   | 2654   |
| K03501 16S rRNA (guanine527-N7)-methyltransferase [EC:2.1.1.170]                                                | 2268   | 2318   | 2287   | 2254   | 2086   | 2248   | 2229   | 2172   | 1902   | 1924   | 2016   | 1886   |
| K03595 GTPase                                                                                                   | 2743   | 2781   | 2980   | 2758   | 3136   | 3332   | 3297   | 3167   | 3167   | 3242   | 3250   | 3196   |
| K03665 GTPase                                                                                                   | 4234   | 4324   | 4318   | 4224   | 4706   | 4776   | 4748   | 4865   | 4318   | 4320   | 4511   | 4365   |
| K03789 [ribosomal protein S18]-alanine N-acetyltransferase [EC:2.3.1.266]                                       | 1433   | 1342   | 1252   | 1394   | 701    | 706    | 750    | 798    | 933    | 1000   | 977    | 925    |
| K03790 [ribosomal protein S5]-alanine N-acetyltransferase [EC:2.3.1.267]                                        | 1739   | 1768   | 1748   | 1725   | 919    | 863    | 894    | 971    | 1371   | 1368   | 1392   | 1449   |
| K03812 ribosome modulation factor                                                                               | 317    | 334    | 336    | 327    | 198    | 210    | 196    | 201    | 197    | 191    | 210    | 219    |
| K03817 ribosomal protein-serine acetyltransferase [EC:2.3.1.-]                                                  | 891    | 984    | 826    | 816    | 445    | 484    | 465    | 486    | 617    | 578    | 563    | 603    |
| K03977 GTPase                                                                                                   | 3157   | 3311   | 3353   | 3288   | 4117   | 4545   | 4325   | 4196   | 4472   | 4614   | 4647   | 4528   |
| K03979 GTPase [EC:3.6.5.-]                                                                                      | 3851   | 3708   | 3807   | 3814   | 4099   | 3948   | 4206   | 4146   | 3938   | 4054   | 3870   | 3836   |
| K04795 fibrillar-like pre-rRNA processing protein                                                               | 0      | 0      | 0      | 0      | 0      | 0      | 0      | 2      | 0      | 2      | 2      | 4      |
| K05590 ATP-dependent RNA helicase SrmB [EC:3.6.4.13]                                                            | 697    | 702    | 673    | 744    | 555    | 507    | 453    | 526    | 1047   | 1027   | 952    | 1046   |
| K05591 ATP-independent RNA helicase DbpA [EC:3.6.4.13]                                                          | 1614   | 1530   | 1575   | 1627   | 1080   | 1110   | 1032   | 1125   | 1311   | 1362   | 1322   | 1465   |
| K05808 putative sigma-54 modulation protein                                                                     | 1176   | 1125   | 1165   | 1177   | 1177   | 1091   | 1125   | 1208   | 1105   | 1153   | 1164   | 1192   |
| K05809 ribosome-associated inhibitor A                                                                          | 241    | 213    | 201    | 194    | 155    | 196    | 167    | 144    | 315    | 337    | 333    | 358    |
| K05844 ribosomal protein S6--L-glutamate ligase [EC:6.3.2.-]                                                    | 1068   | 1145   | 1117   | 1151   | 782    | 760    | 788    | 736    | 967    | 943    | 954    | 895    |
| K06174 ATP-binding cassette, sub-family E, member 1                                                             | 3      | 0      | 0      | 1      | 0      | 0      | 2      | 2      | 4      | 16     | 20     | 7      |
| K06177 tRNA pseudouridine32 synthase / 23S rRNA pseudouridine746 synthase [EC:5.4.99.28 5.4.99.29]              | 2909   | 2844   | 2782   | 2807   | 3718   | 3804   | 3797   | 3649   | 3400   | 3258   | 3295   | 3219   |
| K06178 23S rRNA pseudouridine2605 synthase [EC:5.4.99.22]                                                       | 776    | 825    | 836    | 837    | 672    | 727    | 914    | 986    | 1026   | 1058   | 966    | 1054   |
| K06179 23S rRNA pseudouridine955/2504/2580 synthase [EC:5.4.99.24]                                              | 2298   | 2421   | 2435   | 2420   | 1432   | 1486   | 1360   | 1382   | 1738   | 1676   | 1669   | 1669   |
| K06180 23S rRNA pseudouridine1911/1915/1917 synthase [EC:5.4.99.23]                                             | 4835   | 4864   | 5154   | 5023   | 7249   | 7418   | 7297   | 7164   | 6469   | 6289   | 6697   | 6448   |
| K06181 23S rRNA pseudouridine2457 synthase [EC:5.4.99.20]                                                       | 1468   | 1385   | 1289   | 1334   | 812    | 761    | 657    | 754    | 881    | 847    | 828    | 882    |
| K06182 23S rRNA pseudouridine2604 synthase [EC:5.4.99.21]                                                       | 1838   | 1787   | 1745   | 1838   | 939    | 997    | 924    | 1067   | 1365   | 1263   | 1300   | 1261   |
| K06183 16S rRNA pseudouridine516 synthase [EC:5.4.99.19]                                                        | 1702   | 1784   | 1681   | 1669   | 1029   | 986    | 1031   | 1011   | 1247   | 1161   | 1208   | 1283   |
| K06442 23S rRNA (cytidine1920-2'-O)/16S rRNA (cytidine1409-2'-O)-methyltransferase [EC:2.1.1.226 2.1.1.227]     | 506    | 462    | 466    | 530    | 172    | 176    | 156    | 171    | 521    | 568    | 491    | 537    |
| K06941 23S rRNA (adenine2503-C2)-methyltransferase [EC:2.1.1.192]                                               | 3673   | 3546   | 3857   | 3715   | 3873   | 3928   | 3996   | 4010   | 4139   | 4110   | 4153   | 4117   |
| K06942 ribosome-binding ATPase                                                                                  | 3863   | 4025   | 4076   | 4048   | 4638   | 4857   | 4673   | 4580   | 4149   | 4293   | 4458   | 4260   |
| K06948 30S ribosome assembly GTPase                                                                             | 73     | 69     | 65     | 63     | 14     | 19     | 33     | 27     | 70     | 97     | 64     | 77     |
| K06961 ribosomal RNA assembly protein                                                                           | 0      | 0      | 0      | 1      | 2      | 0      | 0      | 0      | 2      | 3      | 3      | 10     |
| K06968 23S rRNA (cytidine2498-2'-O)-methyltransferase [EC:2.1.1.186]                                            | 1380   | 1378   | 1330   | 1370   | 782    | 839    | 804    | 843    | 1156   | 1178   | 1200   | 1160   |
| K06969 23S rRNA (cytosine1962-C5)-methyltransferase [EC:2.1.1.191]                                              | 5367   | 5358   | 5434   | 5248   | 4752   | 4722   | 5108   | 4930   | 4377   | 4525   | 4490   | 4397   |
| K06970 23S rRNA (adenine1618-N6)-methyltransferase [EC:2.1.1.181]                                               | 1050   | 1094   | 1058   | 1061   | 2195   | 2005   | 2242   | 2102   | 2139   | 2097   | 2165   | 2200   |
| K07042 probable rRNA maturation factor                                                                          | 1168   | 1132   | 1099   | 1115   | 689    | 670    | 647    | 694    | 897    | 866    | 814    | 960    |
| K07056 16S rRNA (cytidine1402-2'-O)-methyltransferase [EC:2.1.1.198]                                            | 2360   | 2439   | 2542   | 2491   | 3846   | 3812   | 3961   | 3827   | 3485   | 3378   | 3588   | 3534   |
| K07115 23S rRNA (adenine2030-N6)-methyltransferase [EC:2.1.1.266]                                               | 2488   | 2585   | 2502   | 2484   | 3029   | 3112   | 3006   | 3140   | 2672   | 2410   | 2452   | 2559   |
| K07320 ribosomal protein L3 glutamine methyltransferase [EC:2.1.1.298]                                          | 950    | 934    | 854    | 1025   | 637    | 610    | 614    | 582    | 944    | 1003   | 989    | 965    |
| K07566 L-threonylcarbamoyladenylyl synthase [EC:2.7.7.87]                                                       | 2186   | 2058   | 2045   | 2078   | 2294   | 2129   | 2321   | 2396   | 2386   | 2436   | 2375   | 2350   |
| K07569 RNA-binding protein                                                                                      | 2      | 2      | 0      | 1      | 0      | 0      | 0      | 0      | 1      | 5      | 0      | 1      |
| K07574 RNA-binding protein                                                                                      | 909    | 947    | 924    | 944    | 594    | 547    | 522    | 484    | 636    | 617    | 568    | 612    |
| K08316 16S rRNA (guanine966-N2)-methyltransferase [EC:2.1.1.171]                                                | 1305   | 1275   | 1174   | 1206   | 781    | 726    | 734    | 779    | 855    | 865    | 821    | 898    |
| K09136 ribosomal protein S12 methylthiotransferase accessory factor                                             | 1723   | 1553   | 1572   | 1660   | 1002   | 1086   | 1117   | 946    | 1650   | 1751   | 1604   | 1749   |
| K09140 pre-rRNA-processing protein TS93                                                                         | 0      | 0      | 0      | 0      | 0      | 0      | 0      | 0      | 0      | 0      | 0      | 0      |
| K09710 ribosome-associated protein                                                                              | 972    | 986    | 1121   | 1041   | 1256   | 1132   | 1270   | 1204   | 1169   | 1183   | 1182   | 1151   |
| K09748 ribosome maturation factor RimP                                                                          | 1563   | 1659   | 1778   | 1699   | 1892   | 1865   | 1858   | 1850   | 1638   | 1709   | 1759   | 1612   |
| K09761 16S rRNA (uracil1498-N3)-methyltransferase [EC:2.1.1.193]                                                | 2612   | 2711   | 2533   | 2473   | 2778   | 2717   | 2697   | 2762   | 2569   | 2778   | 2569   | 2638   |
| K09889 ribosome-associated protein                                                                              | 1107   | 1103   | 1070   | 1132   | 662    | 656    | 681    | 701    | 807    | 719    | 684    | 763    |
| K11145 ribonuclease III family protein [EC:3.1.26.-]                                                            | 192    | 218    | 210    | 209    | 71     | 48     | 71     | 53     | 215    | 214    | 188    | 238    |
| K11391 23S rRNA (guanine1835-N2)-methyltransferase [EC:2.1.1.174]                                               | 1882   | 1977   | 1885   | 1922   | 1237   | 1187   | 1182   | 1239   | 1438   | 1342   | 1361   | 1447   |
| K11392 16S rRNA (cytosine1407-C5)-methyltransferase [EC:2.1.1.178]                                              | 771    | 771    | 762    | 835    | 515    | 538    | 575    | 556    | 989    | 1089   | 1088   | 1174   |
| K12297 23S rRNA (guanine2445-N2)-methyltransferase / 23S rRNA (guanine2069-N7)-methyltransferase [EC:2.1.1.264] | 3654   | 3731   | 3517   | 3678   | 2190   | 2156   | 2110   | 2054   | 2569   | 2571   | 2568   | 2485   |
| K14441 ribosomal protein S12 methylthiotransferase [EC:2.8.4.4]                                                 | 3914   | 3764   | 3882   | 3909   | 4323   | 4251   | 4270   | 4288   | 3928   | 3895   | 3793   | 3982   |
| K14540 ribosome biogenesis GTPase A                                                                             | 439    | 432    | 442    | 416    | 160    | 155    | 180    | 157    | 496    | 476    | 435    | 490    |
| K14761 ribosome-associated protein                                                                              | 264    | 280    | 292    | 269    | 160    | 156    | 172    | 156    | 357    | 334    | 368    | 392    |
| K14762 ribosome-associated protein                                                                              | 191    | 199    | 187    | 186    | 180    | 165    | 152    | 149    | 263    | 243    | 272    | 244    |
| K14768 U3 small nucleolar RNA-associated protein 7                                                              | 0      | 0      | 0      | 0      | 0      | 0      | 0      | 0      | 0      | 1      | 0      | 0      |
| K14779 ATP-dependent RNA helicase DDX52/ROK1 [EC:3.6.4.13]                                                      | 0      | 4      | 0      | 0      | 0      | 0      | 0      | 0      | 0      | 0      | 0      | 0      |
| K14782 protein AATF/BFR2                                                                                        | 0      | 0      | 0      | 1      | 0      | 0      | 0      | 0      | 0      | 0      | 0      | 0      |
| K14797 essential nuclear protein 1                                                                              | 0      | 0      | 0      | 0      | 0      | 0      | 0      | 0      | 0      | 0      | 0      | 1      |
| K14810 ATP-dependent RNA helicase DDX56/DBP9 [EC:3.6.4.13]                                                      | 0      | 0      | 0      | 0      | 0      | 0      | 0      | 0      | 0      | 0      | 0      | 1      |
| K14811 ATP-dependent RNA helicase DBP3 [EC:3.6.4.13]                                                            | 0      | 0      | 2      | 0      | 0      | 0      | 0      | 0      | 0      | 0      | 0      | 0      |
| K14831 protein MAK16                                                                                            | 0      | 0      | 0      | 0      | 0      | 0      | 0      | 0      | 0      | 2      | 0      | 0      |
| K14832 ribosome biogenesis protein MAK21                                                                        | 0      | 0      | 0      | 0      | 0      | 0      | 0      | 0      | 0      | 0      | 0      | 0      |
| K14846 ribosome production factor 1                                                                             | 0      | 2      | 0      | 0      | 0      | 0      | 0      | 0      | 0      | 0      | 0      | 0      |
| K14859 ribosome biogenesis protein SSF1/2                                                                       | 0      | 0      | 0      | 0      | 0      | 0      | 0      | 0      | 0      | 0      | 0      | 1      |
| K15508 21S rRNA (uridine2791-2'-O)-methyltransferase [EC:2.1.1.168]                                             | 0      | 0      | 0      | 0      | 0      | 0      | 0      | 0      | 0      | 2      | 0      | 0      |
| K15632 23S rRNA (adenine-C8)-methyltransferase [EC:2.1.1.224]                                                   | 6      | 5      | 6      | 4      | 1      | 1      | 1      | 0      | 24     | 24     | 12     | 17     |
| K15984 16S rRNA (guanine1516-N2)-methyltransferase [EC:2.1.1.242]                                               | 1978   | 1901   | 1731   | 1854   | 1159   | 1043   | 1029   | 1072   | 1251   | 1240   | 1198   | 1181   |
| K18850 50S ribosomal protein L16 3-hydroxylase [EC:1.14.1.47]                                                   | 2001   | 2026   | 2005   | 2115   | 1361   | 1375   | 1365   | 1313   | 2059   | 2221   | 1922   | 2059   |
| K20224 importin-9                                                                                               | 0      | 2      | 0      | 0      | 0      | 0      | 0      | 0      | 0      | 0      | 0      | 0      |
| K21514 23S rRNA (uridine2479-2'-O)-methyltransferase [EC:2.1.1.208]                                             | 3      | 0      | 2      | 3      | 0      | 0      | 0      | 0      | 3      | 2      | 0      | 1      |
| ko03016 Transfer RNA biogenesis                                                                                 | 302875 | 303504 | 304679 | 304679 | 300276 | 304600 | 302449 | 299449 | 299014 | 301908 | 298864 | 300575 |
| K00554 tRNA (guanine37-N1)-methyltransferase [EC:2.1.1.228]                                                     | 2309   | 2356   | 2488   | 2380   | 2298   | 2431   | 2449   | 2318   | 2469   | 2459   | 2568   | 2435   |
| K00555 tRNA (guanine26-N2)/guanine27-N2)-dimethyltransferase [EC:2.1.1.215 2.1.1.216]                           | 0      | 0      | 3      | 1      | 0      | 0      | 0      | 2      | 1      | 10     | 6      | 12     |
| K00556 tRNA (guanosine-2'-O)-methyltransferase [EC:2.1.1.34]                                                    | 501    | 449    | 479    | 489    | 280    | 389    | 320    | 331    | 622    | 713    | 666    | 732    |
| K00557 tRNA (uracil-5-)-methyltransferase [EC:2.1.1.35]                                                         | 2379   | 2429   | 2258   | 2376   | 1396   | 1418   | 1365   | 1391   | 1479   | 1487   | 1401   | 1410   |
| K0                                                                                                              |        |        |        |        |        |        |        |        |        |        |        |        |

|                                                                                                      |        |        |        |        |        |        |        |        |        |        |        |        |
|------------------------------------------------------------------------------------------------------|--------|--------|--------|--------|--------|--------|--------|--------|--------|--------|--------|--------|
| K06173 tRNA pseudouridine38-40 synthase [EC:5.4.99.12]                                               | 2952   | 2849   | 2992   | 2847   | 2860   | 2760   | 2775   | 2878   | 2869   | 3071   | 3129   | 3044   |
| K06175 tRNA pseudouridine65 synthase [EC:5.4.99.26]                                                  | 447    | 487    | 442    | 504    | 326    | 358    | 365    | 359    | 632    | 709    | 684    | 691    |
| K06176 tRNA pseudouridine13 synthase [EC:5.4.99.27]                                                  | 2191   | 2075   | 1950   | 2030   | 1262   | 1215   | 1247   | 1257   | 1285   | 1333   | 1310   | 1371   |
| K06917 tRNA 2-selenouridine synthase [EC:2.9.1.-]                                                    | 966    | 1044   | 864    | 987    | 441    | 453    | 453    | 390    | 1082   | 1272   | 1228   | 1173   |
| K06925 tRNA threonylcarbamoyladenosine biosynthesis protein TsaE                                     | 1487   | 1554   | 1632   | 1545   | 1645   | 1713   | 1693   | 1641   | 1565   | 1583   | 1611   | 1686   |
| K06932 tRNA(ile2)-agmatinylcytidine synthase [EC:6.3.4.22]                                           | 0      | 0      | 1      | 0      | 0      | 3      | 0      | 0      | 4      | 3      | 4      | 10     |
| K06957 tRNA(Met) cytidine acetyltransferase [EC:2.3.1.193]                                           | 1210   | 1216   | 1130   | 1247   | 780    | 881    | 846    | 852    | 1600   | 1572   | 1515   | 1665   |
| K06967 tRNA [adenine22-N1]-methyltransferase [EC:2.1.1.217]                                          | 319    | 306    | 308    | 294    | 74     | 84     | 103    | 99     | 331    | 370    | 326    | 345    |
| K06980 tRNA-modifying protein YgZ                                                                    | 2214   | 2098   | 1908   | 2032   | 1305   | 1267   | 1147   | 1339   | 1371   | 1365   | 1241   | 1467   |
| K07050 misacylated tRNA(Ala) deacylase [EC:3.1.1.-]                                                  | 0      | 0      | 0      | 0      | 0      | 0      | 2      | 1      | 0      | 0      | 0      | 1      |
| K07055 tRNA wybutosine-synthesizing protein 2 [EC:2.5.1.114]                                         | 0      | 0      | 0      | 1      | 0      | 0      | 2      | 3      | 0      | 0      | 0      | 2      |
| K07254 tRNA [cytidine56-2'-O]-methyltransferase [EC:2.1.1.206]                                       | 0      | 0      | 0      | 1      | 0      | 0      | 0      | 0      | 1      | 4      | 5      | 0      |
| K07442 tRNA [adenine57-N1/adenine58-N1]-methyltransferase catalytic subunit [EC:2.1.1.219 2.1.1.220] | 12     | 7      | 11     | 10     | 7      | 7      | 8      | 2      | 13     | 37     | 14     | 32     |
| K07446 tRNA [guanine10-N2]-dimethyltransferase [EC:2.1.1.213]                                        | 0      | 0      | 0      | 1      | 0      | 2      | 0      | 0      | 0      | 5      | 2      | 1      |
| K07558 tRNA nucleotidyltransferase (CCA-adding enzyme) [EC:2.7.7.72]                                 | 0      | 0      | 0      | 1      | 0      | 0      | 0      | 4      | 2      | 8      | 3      | 12     |
| K07559 putative RNA 2'-phosphotransferase [EC:2.7.1.-]                                               | 1318   | 1255   | 1185   | 1190   | 770    | 710    | 686    | 773    | 477    | 493    | 435    | 415    |
| K07560 D-aminoacyl-tRNA deacylase [EC:3.1.1.96]                                                      | 1624   | 1610   | 1722   | 1659   | 1842   | 1928   | 1805   | 1900   | 1831   | 1754   | 1727   | 1835   |
| K07568 S-adenosylmethionine:tRNA ribosyltransferase-isomerase [EC:2.4.99.17]                         | 4985   | 5151   | 5224   | 5086   | 6857   | 6924   | 6796   | 6793   | 6108   | 6029   | 6146   | 6029   |
| K07583 tRNA pseudouridine synthase 10 [EC:5.4.99.25]                                                 | 0      | 3      | 2      | 1      | 0      | 4      | 0      | 2      | 2      | 13     | 3      | 17     |
| K07739 elongator complex protein 3 [EC:2.3.1.48]                                                     | 1      | 2      | 3      | 0      | 1      | 2      | 0      | 5      | 2      | 32     | 9      | 14     |
| K09119 KEOPS complex subunit Cg121                                                                   | 1      | 0      | 0      | 0      | 0      | 0      | 0      | 0      | 4      | 4      | 0      | 3      |
| K09765 epoxyqueuosine reductase [EC:1.17.99.6]                                                       | 705    | 692    | 706    | 666    | 1261   | 1245   | 1383   | 1305   | 1133   | 1081   | 1126   | 1125   |
| K11991 tRNA(adenine34) deaminase [EC:3.5.4.33]                                                       | 878    | 956    | 1041   | 898    | 1274   | 1308   | 1193   | 1280   | 1482   | 1511   | 1445   | 1498   |
| K13628 iron-sulfur cluster assembly protein                                                          | 704    | 718    | 822    | 688    | 434    | 475    | 418    | 452    | 519    | 443    | 441    | 484    |
| K14058 tRNA 2-thiocytidine biosynthesis protein TtcA                                                 | 1599   | 1596   | 1539   | 1664   | 1029   | 1082   | 994    | 1020   | 1192   | 1257   | 1197   | 1287   |
| K14415 tRNA-splicing ligase RtcB (3'-phosphate/5'-hydroxy nucleic acid ligase) [EC:6.5.1.8]          | 4402   | 4455   | 4513   | 4269   | 5924   | 6137   | 6341   | 6268   | 4766   | 4684   | 4784   | 4593   |
| K14742 tRNA threonylcarbamoyladenosine biosynthesis protein TsaB                                     | 2116   | 2176   | 2063   | 2054   | 2301   | 2286   | 2358   | 2328   | 2116   | 2093   | 2042   | 2056   |
| K14864 tRNA [cytidine32/guanosine34-2'-O]-methyltransferase [EC:2.1.1.205]                           | 0      | 2      | 0      | 0      | 0      | 0      | 0      | 0      | 0      | 0      | 0      | 0      |
| K15256 tRNA (mo5U34)-methyltransferase [EC:2.1.1.-]                                                  | 2422   | 2505   | 2461   | 2510   | 1463   | 1504   | 1551   | 1534   | 1177   | 1153   | 1134   | 1122   |
| K15257 tRNA (mo5U34)-methyltransferase [EC:2.1.1.-]                                                  | 2078   | 1976   | 1987   | 1950   | 1073   | 1149   | 1088   | 1170   | 1225   | 1229   | 1274   | 1261   |
| K15396 tRNA [cytidine32/uridine32-2'-O]-methyltransferase [EC:2.1.1.200]                             | 1616   | 1642   | 1614   | 1610   | 937    | 958    | 905    | 896    | 1019   | 1041   | 976    | 1059   |
| K15429 tRNA [guanine37-N1]-methyltransferase [EC:2.1.1.228]                                          | 0      | 0      | 0      | 0      | 0      | 0      | 0      | 0      | 0      | 5      | 2      | 6      |
| K15437 aminoacyl-tRNA synthase complex-interacting multifunctional protein 1                         | 0      | 0      | 0      | 0      | 0      | 0      | 0      | 0      | 0      | 0      | 1      | 0      |
| K15441 tRNA-specific adenosine deaminase 2 [EC:3.5.4.-]                                              | 1      | 0      | 0      | 0      | 0      | 0      | 0      | 0      | 0      | 0      | 0      | 0      |
| K15449 tRNA wybutosine-synthesizing protein 1 [EC:4.1.3.44]                                          | 2      | 0      | 2      | 1      | 2      | 0      | 0      | 0      | 5      | 10     | 7      | 3      |
| K15451 tRNA wybutosine-synthesizing protein 4 [EC:2.1.1.290 2.3.1.231]                               | 2      | 0      | 0      | 0      | 0      | 0      | 0      | 0      | 0      | 0      | 0      | 0      |
| K15460 tRNA1Val [adenine37-N6]-methyltransferase [EC:2.1.1.223]                                      | 805    | 855    | 873    | 895    | 1688   | 1712   | 1779   | 1483   | 1629   | 1481   | 1464   | 1581   |
| K15461 tRNA 5-methylaminomethyl-2-thiouridine biosynthesis bifunctional protein [EC:2.1.1.61 1.5.-]  | 3428   | 3557   | 3154   | 3451   | 1987   | 1951   | 1793   | 2212   | 2179   | 2056   | 2018   | 2122   |
| K15865 threonylcarbamoyladenosine tRNA methylthiotransferase CDKAL1 [EC:2.8.4.5]                     | 0      | 0      | 0      | 0      | 0      | 0      | 0      | 0      | 13     | 8      | 3      | 12     |
| K16317 tRNA [pseudouridine54-N1]-methyltransferase [EC:2.1.1.257]                                    | 0      | 0      | 0      | 0      | 0      | 0      | 0      | 0      | 0      | 0      | 0      | 1      |
| K18707 threonylcarbamoyladenosine tRNA methylthiotransferase MtaB [EC:2.8.4.5]                       | 1447   | 1439   | 1428   | 1422   | 2969   | 2905   | 3015   | 2868   | 2547   | 2476   | 2679   | 2497   |
| K18779 7-cyano-7-deazaguanine tRNA-ribosyltransferase [EC:2.4.2.48]                                  | 2      | 2      | 0      | 2      | 3      | 0      | 5      | 0      | 9      | 12     | 3      | 13     |
| K18828 tRNA(Met)-specific endonuclease VapC [EC:3.1.-]                                               | 591    | 672    | 708    | 659    | 559    | 582    | 625    | 547    | 156    | 152    | 129    | 163    |
| K18979 epoxyqueuosine reductase [EC:1.17.99.6]                                                       | 2505   | 2511   | 2408   | 2521   | 1329   | 1379   | 1310   | 1447   | 1551   | 1693   | 1556   | 1643   |
| K19055 Ala-tRNA(Pro) deacylase [EC:3.1.1.-]                                                          | 1179   | 1217   | 1220   | 1228   | 717    | 676    | 661    | 639    | 848    | 908    | 821    | 96     |
| K21947 tRNA 5-methyluridine54-2-sulfuryltransferase [EC:2.8.1.15]                                    | 16     | 16     | 20     | 11     | 8      | 7      | 6      | 3      | 15     | 27     | 8      | 24     |
| K22132 tRNA threonylcarbamoyladenosine dehydratase                                                   | 2366   | 2404   | 2285   | 2282   | 2480   | 2449   | 2497   | 2398   | 2386   | 2431   | 2393   | 2330   |
| K22446 tRNA [cytosine49-CS]-methyltransferase [EC:2.1.1.-]                                           | 1      | 2      | 0      | 0      | 0      | 0      | 0      | 0      | 4      | 4      | 1      | 1      |
| K22900 tRNA [adenine37-N6]-methyltransferase [EC:2.1.1.-]                                            | 1267   | 1126   | 1073   | 1183   | 809    | 726    | 722    | 780    | 924    | 922    | 918    | 921    |
| K22901 tRNA [cytosine40-48-CS]-methyltransferase [EC:2.1.1.-]                                        | 0      | 0      | 0      | 0      | 0      | 0      | 0      | 0      | 0      | 0      | 1      | 0      |
| ko03012 Translation factors                                                                          | 74099  | 73560  | 74132  | 74198  | 79172  | 80030  | 80308  | 79532  | 75911  | 75938  | 75714  | 75841  |
| K01056 peptidyl-tRNA hydrolase, PTH1 family [EC:3.1.1.29]                                            | 2220   | 2180   | 2234   | 2166   | 2362   | 2450   | 2222   | 2353   | 2148   | 2124   | 2197   | 2125   |
| K02355 elongation factor G                                                                           | 13885  | 14034  | 14571  | 14373  | 16119  | 16274  | 16431  | 15978  | 15295  | 15373  | 15119  | 14999  |
| K02356 elongation factor P                                                                           | 2301   | 2163   | 2274   | 2298   | 2447   | 2455   | 2424   | 2482   | 2651   | 2804   | 2664   | 2685   |
| K02357 elongation factor Ts                                                                          | 2096   | 2094   | 2153   | 2163   | 3033   | 3178   | 3099   | 2950   | 3111   | 3183   | 3199   | 3084   |
| K02358 elongation factor Tu                                                                          | 7248   | 7245   | 7465   | 7340   | 6619   | 7047   | 6673   | 6791   | 6268   | 6267   | 6172   | 6165   |
| K02493 release factor glutamine methyltransferase [EC:2.1.1.297]                                     | 2942   | 2843   | 2800   | 2863   | 2979   | 3066   | 3051   | 3084   | 2841   | 2665   | 2896   | 2810   |
| K02518 translation initiation factor IF-1                                                            | 698    | 680    | 684    | 679    | 767    | 838    | 869    | 800    | 851    | 838    | 812    | 805    |
| K02519 translation initiation factor IF-2                                                            | 7933   | 7841   | 8057   | 7814   | 9232   | 9372   | 10195  | 10116  | 8934   | 8185   | 8140   | 8210   |
| K02520 translation initiation factor 3                                                               | 1846   | 1811   | 1875   | 1803   | 1995   | 1863   | 2155   | 2079   | 1884   | 1849   | 1898   | 1942   |
| K02835 peptide chain release factor 1                                                                | 3934   | 3744   | 3922   | 4025   | 4182   | 4000   | 4196   | 3990   | 4103   | 4015   | 3868   | 3936   |
| K02836 peptide chain release factor 2                                                                | 3520   | 3553   | 3531   | 3568   | 3587   | 3577   | 3639   | 3611   | 3541   | 3525   | 3545   | 3490   |
| K02837 peptide chain release factor 3                                                                | 4478   | 4339   | 4490   | 4542   | 5279   | 5364   | 5340   | 5320   | 5193   | 5041   | 5117   | 5186   |
| K02838 ribosome recycling factor                                                                     | 1991   | 1899   | 2039   | 1971   | 2089   | 2159   | 2101   | 2094   | 2013   | 2032   | 2016   | 1978   |
| K02839 peptide chain release factor                                                                  | 1409   | 1582   | 1480   | 1465   | 1783   | 1789   | 1758   | 1611   | 1276   | 1213   | 1293   | 1278   |
| K03232 elongation factor 1-beta                                                                      | 0      | 0      | 0      | 0      | 0      | 0      | 0      | 0      | 0      | 0      | 0      | 1      |
| K03235 elongation factor 3                                                                           | 0      | 0      | 1      | 0      | 0      | 0      | 0      | 0      | 0      | 1      | 0      | 0      |
| K03263 translation initiation factor 5A                                                              | 0      | 0      | 0      | 0      | 0      | 3      | 0      | 2      | 0      | 0      | 3      | 0      |
| K03833 selenocysteine-specific elongation factor                                                     | 4451   | 4348   | 3745   | 4191   | 2615   | 2412   | 2452   | 2563   | 2609   | 2592   | 2504   | 2768   |
| K04568 elongation factor P-(R)-beta-lysine ligase [EC:6.3.1.-]                                       | 693    | 652    | 621    | 664    | 468    | 463    | 506    | 444    | 885    | 972    | 888    | 900    |
| K04794 peptidyl-tRNA hydrolase, PTH2 family [EC:3.1.1.29]                                            | 2      | 1      | 0      | 1      | 0      | 5      | 0      | 3      | 0      | 7      | 3      | 3      |
| K06158 ATP-binding cassette, subfamily F, member 3                                                   | 9144   | 9213   | 8978   | 9047   | 10940  | 11018  | 10571  | 10559  | 9939   | 9971   | 10093  | 10068  |
| K06927 diphthine-ammonia ligase [EC:6.3.1.14]                                                        | 2      | 3      | 0      | 0      | 0      | 4      | 2      | 0      | 1      | 2      | 3      | 7      |
| K07561 2-(3-amino-3-carboxypropyl)histidine synthase [EC:2.5.1.108]                                  | 2      | 0      | 0      | 0      | 0      | 2      | 0      | 0      | 4      | 3      | 3      | 9      |
| K09890 alternative ribosome-rescue factor                                                            | 339    | 374    | 355    | 366    | 191    | 197    | 188    | 187    | 307    | 277    | 283    | 308    |
| K09906 elongation factor P hydroxylase [EC:1.14.-]                                                   | 345    | 318    | 333    | 316    | 220    | 213    | 217    | 216    | 426    | 518    | 486    | 490    |
| K15029 translation initiation factor 3 subunit L                                                     | 0      | 0      | 0      | 0      | 0      | 0      | 0      | 0      | 0      | 0      | 0      | 1      |
| K15034 ribosome-associated protein                                                                   | 868    | 840    | 836    | 866    | 536    | 483    | 439    | 484    | 506    | 482    | 473    | 473    |
| K19810 L-lysine 2,3-aminomutase [EC:5.4.3.-]                                                         | 667    | 653    | 614    | 653    | 434    | 534    | 462    | 449    | 969    | 940    | 903    | 995    |
| ko03110 Chaperones and folding catalysts                                                             | 140562 | 142302 | 144193 | 142461 | 171690 | 171961 | 172907 | 172002 | 156854 | 155575 | 157192 | 155640 |
| K02199 cytochrome c biogenesis protein CcmG, thiol:disulfide interchange protein DsbE                | 775    | 734    | 716    | 743    | 370    | 356    | 351    | 409    | 583    | 533    | 556    | 562    |
| K03611 disulfide bond formation protein DsbB                                                         | 2288   | 2317   | 2178   | 2264   | 1297   | 1316   | 1217   | 1419   | 1114   | 1200   | 1066   | 1070   |
| K03667 ATP-dependent HslUV protease ATP-binding subunit HslU                                         | 3231   | 3335   | 3160   | 3331   | 1963   | 2013   | 1682   | 1877   | 2028   | 2121   | 1976   | 2085   |
| K03672 thioredoxin 2 [EC:1.8.1.8]                                                                    | 271    | 243    | 248    | 244    | 170    | 188    | 178    | 181    | 354    | 402    | 352    | 412    |
| K03674 glutaredoxin 1                                                                                | 132    | 163    | 162    | 154    | 100    | 94     | 102    | 105    | 192    | 210    | 193    | 215    |
| K03675 glutaredoxin 2                                                                                | 77     | 99     | 105    | 132    | 179    | 176    | 214    | 200    | 36     | 31     | 28     | 33     |
| K03676 glutaredoxin 3                                                                                | 644    | 665    | 631    | 638    | 396    | 462    | 390    | 395    | 400    | 409    | 417    | 428    |
| K03686 molecular chaperone DnaJ                                                                      | 3291   | 3442   | 3241   | 3286   | 3702   | 3566   | 3480   | 3493   | 3163   | 3138   | 3235   | 3430   |
| K03687 molecular chaperone GrpE                                                                      | 1148   | 1061   | 1093   | 1097   | 1375   | 1433   | 1686   | 1548   | 1564   | 1559   | 1566   | 1466   |
| K03694 ATP-dependent Clp protease ATP-binding subunit ClpA                                           | 2891   | 2798   | 2889   | 2884   | 1959   | 2008   | 1995   | 1932   | 2427   | 2450   | 2275   | 2439   |
| K03696 ATP-dependent Clp protease ATP-binding subunit ClpC                                           | 7391   | 7401   | 7383   | 7143   | 7670   | 7260   | 7681   | 7673   | 6183   | 6162   | 6199   | 6048   |
| K03697 ATP-dependent Clp protease ATP-binding subunit ClpE                                           | 105    | 128    | 122    | 122    | 42     | 40     | 37     | 34     | 128    | 142    | 149    | 157    |
| K03768 peptidyl-prolyl cis-trans isomerase B [cyclophilin B] [EC:5.2.1.8]                            | 1812   | 1814   | 1727   | 1862   | 913    | 981    | 957    | 1050   | 1434   | 1525   | 1478   | 1496   |
| K03769 peptidyl-prolyl cis-trans isomerase C [EC:5.2.1.8]                                            | 2848   | 2795   | 2684   | 2660   | 1829   | 1882   | 1821   | 1887   | 1363   | 1339   | 1305   | 1406   |
| K03770 peptidyl-prolyl cis-trans isomerase D [EC:5.2.1.8]                                            | 3607   | 3514   | 3713   | 3647   | 6022   | 6216   | 6396   | 6170   | 5246   | 5137   | 5271   | 5307   |
| K03771 peptidyl-prolyl cis-trans isomerase SurA [EC:5.2.1.8]                                         | 2606   | 2845   | 2940   | 2787   | 6809   | 6968   | 7175   | 6967   | 5754   | 5251   | 5598   | 5336   |
| K03772 FKBP-type peptidyl-prolyl cis-trans isomerase FkpA [EC:5.2.1.8]                               |        |        |        |        |        |        |        |        |        |        |        |        |

|                                                                     |        |        |        |        |        |        |        |        |        |        |        |        |
|---------------------------------------------------------------------|--------|--------|--------|--------|--------|--------|--------|--------|--------|--------|--------|--------|
| K07346 fimbrial chaperone protein                                   | 3012   | 3090   | 2860   | 3003   | 1673   | 1702   | 1671   | 1796   | 1535   | 1499   | 1517   | 1563   |
| K07390 monothiol glutaredoxin                                       | 676    | 663    | 678    | 691    | 387    | 394    | 370    | 454    | 395    | 411    | 375    | 448    |
| K07533 foldase protein PrSa [EC:5.2.1.8]                            | 418    | 429    | 374    | 437    | 128    | 117    | 100    | 102    | 404    | 471    | 430    | 439    |
| K09488 TNF receptor-associated protein 1                            | 3      | 0      | 2      | 3      | 1      | 2      | 0      | 3      | 3      | 4      | 2      | 1      |
| K09510 DnaI homolog subfamily B member 4                            | 0      | 0      | 0      | 0      | 0      | 1      | 0      | 0      | 0      | 0      | 0      | 0      |
| K09569 FK506-binding protein 2 [EC:5.2.1.8]                         | 4      | 2      | 2      | 3      | 6      | 3      | 8      | 4      | 4      | 4      | 14     | 3      |
| K09575 FK506-binding protein 9/10 [EC:5.2.1.8]                      | 4      | 4      | 4      | 2      | 5      | 7      | 2      | 3      | 5      | 7      | 9      | 5      |
| K09796 periplasmic copper chaperone A                               | 784    | 760    | 733    | 742    | 419    | 394    | 346    | 478    | 256    | 258    | 220    | 264    |
| K19777 acid stress chaperone HdeA                                   | 0      | 0      | 0      | 0      | 3      | 2      | 2      | 0      | 12     | 13     | 11     | 11     |
| K19778 acid stress chaperone HdeB                                   | 238    | 302    | 256    | 246    | 76     | 79     | 84     | 73     | 509    | 573    | 545    | 563    |
| K21804 protein N-lysine methyltransferase METTL21A [EC:2.1.1.-]     | 0      | 0      | 0      | 0      | 1      | 0      | 0      | 0      | 0      | 0      | 0      | 0      |
| K22447 archaeal chaperonin                                          | 5      | 2      | 6      | 3      | 5      | 1      | 5      | 2      | 5      | 25     | 8      | 23     |
| K23349 putative dimethyl sulfoxide reductase chaperone              | 339    | 352    | 319    | 345    | 239    | 259    | 283    | 257    | 523    | 496    | 512    | 539    |
| ko04131 Membrane trafficking                                        | 33126  | 33650  | 33901  | 33584  | 38836  | 38843  | 39242  | 39087  | 39286  | 38833  | 39803  | 39386  |
| K08332 vacuolar protein 8                                           | 0      | 0      | 2      | 0      | 0      | 0      | 0      | 0      | 0      | 0      | 0      | 0      |
| K08518 syntaxin-binding protein 5                                   | 0      | 0      | 0      | 0      | 0      | 0      | 0      | 0      | 0      | 4      | 0      | 0      |
| K10402 kinesin family member 20                                     | 0      | 0      | 0      | 0      | 0      | 0      | 0      | 1      | 0      | 0      | 0      | 0      |
| K17922 sorting nexin-8                                              | 0      | 2      | 0      | 0      | 0      | 0      | 0      | 0      | 0      | 0      | 0      | 0      |
| K19950 protein transport protein SEC9                               | 0      | 0      | 1      | 0      | 0      | 0      | 0      | 0      | 0      | 0      | 0      | 0      |
| K19998 sec1 family domain-containing protein 1                      | 0      | 0      | 0      | 0      | 0      | 0      | 0      | 0      | 0      | 0      | 2      | 0      |
| K20280 trafficking protein particle complex subunit 5               | 0      | 0      | 0      | 0      | 0      | 0      | 0      | 0      | 0      | 0      | 0      | 3      |
| K20352 p24 family protein delta-1                                   | 0      | 0      | 0      | 0      | 0      | 0      | 0      | 0      | 0      | 0      | 2      | 0      |
| K20456 oxysterol-binding protein 1                                  | 0      | 0      | 1      | 0      | 0      | 0      | 0      | 0      | 0      | 0      | 0      | 0      |
| K21440 ankryrin repeat domain-containing protein 50                 | 0      | 0      | 0      | 0      | 1      | 2      | 0      | 0      | 0      | 2      | 0      | 1      |
| K23481 vacuolar protein sorting-associated protein 1                | 0      | 0      | 1      | 0      | 0      | 0      | 0      | 0      | 0      | 0      | 0      | 0      |
| ko04121 Ubiquitin system                                            | 7      | 16     | 14     | 9      | 4      | 2      | 2      | 1      | 11     | 5      | 10     | 3      |
| K10273 F-box and leucine-rich repeat protein 7                      | 0      | 0      | 3      | 0      | 0      | 0      | 0      | 0      | 0      | 0      | 0      | 0      |
| K11997 tripartite motif-containing protein 2/3                      | 0      | 0      | 0      | 0      | 0      | 0      | 0      | 0      | 0      | 0      | 1      | 0      |
| K12025 tripartite motif-containing protein 52                       | 0      | 0      | 0      | 0      | 0      | 0      | 0      | 0      | 0      | 1      | 0      | 1      |
| K13570 prokaryotic ubiquitin-like protein Pup                       | 0      | 1      | 0      | 0      | 1      | 0      | 2      | 0      | 3      | 0      | 0      | 0      |
| K15071 recylin-1                                                    | 0      | 1      | 0      | 0      | 0      | 0      | 0      | 0      | 0      | 0      | 0      | 0      |
| K22372 E3 ISG15--protein ligase [EC:2.3.2.-]                        | 1      | 0      | 0      | 0      | 0      | 0      | 0      | 1      | 0      | 0      | 0      | 0      |
| K22382 WD repeat-containing protein 26                              | 0      | 1      | 0      | 0      | 0      | 0      | 0      | 0      | 0      | 0      | 0      | 0      |
| K23333 E3 ubiquitin-protein transferase RMND5 [EC:2.3.2.27]         | 0      | 0      | 0      | 0      | 0      | 0      | 0      | 0      | 0      | 0      | 0      | 0      |
| ko03051 Proteasome                                                  | 8035   | 8045   | 8198   | 8234   | 11373  | 11387  | 11460  | 11438  | 9455   | 9451   | 9563   | 9728   |
| K13571 proteasome accessory factor A [EC:6.3.1.19]                  | 2      | 5      | 6      | 4      | 0      | 5      | 6      | 3      | 5      | 17     | 12     | 20     |
| K13573 proteasome accessory factor C                                | 0      | 1      | 0      | 0      | 0      | 0      | 0      | 0      | 0      | 1      | 0      | 0      |
| K20814 Pup amidohydrolase [EC:3.5.1.119]                            | 3      | 3      | 4      | 2      | 3      | 9      | 1      | 9      | 6      | 4      | 4      | 15     |
| ko03032 DNA replication proteins                                    | 151073 | 152131 | 154561 | 153379 | 177539 | 179508 | 179646 | 177943 | 166333 | 165020 | 164970 | 164458 |
| K02315 DNA replication protein DnaC                                 | 2707   | 2698   | 2756   | 2779   | 1833   | 1810   | 1708   | 1755   | 1843   | 1918   | 1784   | 1820   |
| K02469 DNA gyrase subunit A [EC:5.6.2.2]                            | 9652   | 9879   | 9806   | 9889   | 9055   | 9280   | 9264   | 8947   | 9833   | 9891   | 9375   | 9607   |
| K02470 DNA gyrase subunit B [EC:5.6.2.2]                            | 8651   | 8590   | 8771   | 8696   | 8339   | 8597   | 8787   | 8460   | 8779   | 8915   | 8840   | 8797   |
| K02621 topoisomerase IV subunit A [EC:5.6.2.2]                      | 6129   | 6165   | 6441   | 6389   | 9185   | 9111   | 9095   | 9237   | 7947   | 7459   | 7545   | 7576   |
| K02622 topoisomerase IV subunit B [EC:5.6.2.2]                      | 5161   | 5311   | 5380   | 5383   | 6896   | 6807   | 6965   | 6869   | 5736   | 5672   | 5541   | 5578   |
| K03163 DNA topoisomerase I [EC:5.6.2.1]                             | 0      | 0      | 0      | 0      | 0      | 0      | 0      | 0      | 0      | 0      | 0      | 1      |
| K03166 DNA topoisomerase VI subunit A [EC:5.6.2.2]                  | 0      | 0      | 1      | 0      | 2      | 4      | 2      | 0      | 8      | 10     | 10     | 12     |
| K03167 DNA topoisomerase VI subunit B [EC:5.6.2.2]                  | 1      | 2      | 4      | 0      | 0      | 0      | 0      | 5      | 5      | 8      | 8      | 12     |
| K03168 DNA topoisomerase I [EC:5.6.2.1]                             | 10958  | 10964  | 10899  | 10779  | 10407  | 10381  | 10044  | 10254  | 8920   | 8753   | 8391   | 8541   |
| K03169 DNA topoisomerase III [EC:5.6.2.1]                           | 10565  | 10897  | 11225  | 10763  | 20071  | 20242  | 20277  | 20056  | 18116  | 17946  | 17799  | 17620  |
| K03346 replication initiation and membrane attachment protein       | 72     | 69     | 69     | 80     | 21     | 22     | 22     | 15     | 90     | 86     | 82     | 66     |
| K03530 DNA-binding protein HU-beta                                  | 1924   | 1902   | 1999   | 1869   | 2945   | 2860   | 2951   | 2919   | 2340   | 2348   | 2316   | 2349   |
| K03645 negative modulator of initiation of replication              | 320    | 347    | 344    | 421    | 280    | 256    | 215    | 257    | 567    | 579    | 581    | 540    |
| K04764 integration host factor subunit alpha                        | 570    | 644    | 628    | 608    | 338    | 365    | 343    | 366    | 383    | 389    | 369    | 380    |
| K05787 DNA-binding protein HU-alpha                                 | 648    | 629    | 600    | 639    | 384    | 392    | 353    | 396    | 395    | 378    | 363    | 362    |
| K05788 integration host factor subunit beta                         | 708    | 646    | 669    | 657    | 451    | 449    | 399    | 392    | 378    | 437    | 400    | 424    |
| K09723 DNA replication factor GINS                                  | 0      | 0      | 0      | 0      | 2      | 0      | 2      | 0      | 2      | 4      | 4      | 7      |
| K10725 archaeal cell division control protein 6                     | 0      | 3      | 2      | 0      | 2      | 2      | 0      | 3      | 8      | 8      | 13     | 20     |
| K10730 ATP-dependent DNA helicase Q4 [EC:3.6.4.12]                  | 0      | 0      | 0      | 0      | 0      | 0      | 0      | 0      | 0      | 1      | 0      | 0      |
| K10748 DNA replication terminus site-binding protein                | 502    | 498    | 474    | 503    | 321    | 375    | 372    | 352    | 625    | 712    | 691    | 721    |
| K10763 DnaA-homolog protein                                         | 1473   | 1373   | 1325   | 1521   | 816    | 920    | 807    | 923    | 886    | 961    | 964    | 990    |
| K10900 werner syndrome ATP-dependent helicase [EC:3.6.4.12]         | 0      | 0      | 0      | 0      | 0      | 0      | 0      | 0      | 0      | 1      | 0      | 0      |
| K11144 prismosomal protein DnaI                                     | 48     | 51     | 56     | 58     | 5      | 12     | 8      | 20     | 70     | 77     | 47     | 61     |
| K18996 replication initiation protein RepC                          | 0      | 0      | 0      | 0      | 0      | 0      | 0      | 1      | 11     | 2      | 3      | 4      |
| K19783 DNA polymerase alpha-associated DNA helicase A [EC:3.6.4.12] | 0      | 0      | 0      | 1      | 0      | 0      | 0      | 0      | 0      | 0      | 0      | 0      |
| ko03036 Chromosome and associated proteins                          | 178583 | 179508 | 180946 | 180709 | 189001 | 190387 | 188782 | 189035 | 187482 | 187266 | 185156 | 185336 |
| K02499 tetrapyrrole methylase family protein / MazG family protein  | 198    | 204    | 203    | 193    | 83     | 105    | 109    | 109    | 224    | 241    | 253    | 259    |
| K03466 DNA segregation ATPase FtsK/SpolIIE, S-DNA-T family          | 7822   | 7851   | 8020   | 8036   | 8695   | 8577   | 8809   | 8863   | 8163   | 8314   | 8328   | 8095   |
| K03496 chromosome partitioning protein                              | 10687  | 10580  | 10690  | 11012  | 10427  | 10397  | 10027  | 10084  | 10784  | 10712  | 10585  | 10757  |
| K03528 cell division protein ZipA                                   | 1434   | 1300   | 1413   | 1334   | 867    | 818    | 897    | 928    | 826    | 821    | 744    | 866    |
| K03529 chromosome segregation protein                               | 5563   | 5471   | 5316   | 5630   | 2683   | 2762   | 2556   | 2873   | 2641   | 2860   | 2749   | 2900   |
| K03569 rod shape-determining protein MreB and related proteins      | 3986   | 3959   | 3848   | 3778   | 3953   | 4016   | 4010   | 4027   | 3957   | 4028   | 4044   | 4099   |
| K03570 rod shape-determining protein MreC                           | 1859   | 1920   | 1876   | 1977   | 2738   | 2820   | 2834   | 2649   | 2788   | 2695   | 2794   | 2720   |
| K03571 rod shape-determining protein MreD                           | 1215   | 1230   | 1163   | 1186   | 689    | 653    | 642    | 700    | 836    | 954    | 852    | 853    |
| K03586 cell division protein FtsL                                   | 626    | 637    | 614    | 642    | 444    | 441    | 383    | 364    | 461    | 435    | 432    | 446    |
| K03591 cell division protein FtsN                                   | 422    | 389    | 385    | 427    | 242    | 334    | 341    | 328    | 555    | 535    | 512    | 541    |
| K03593 ATP-binding protein involved in chromosome partitioning      | 1548   | 1698   | 1765   | 1759   | 3216   | 3212   | 3222   | 3220   | 2954   | 2846   | 2830   | 2717   |
| K03608 cell division topological specificity factor                 | 638    | 683    | 660    | 709    | 347    | 338    | 306    | 333    | 470    | 478    | 472    | 474    |
| K03609 septum site-determining protein MinD                         | 2157   | 2167   | 2114   | 2092   | 1138   | 1037   | 1118   | 1101   | 1607   | 1654   | 1599   | 1588   |
| K03610 septum site-determining protein MinC                         | 1811   | 1723   | 1808   | 1886   | 1014   | 910    | 934    | 930    | 1209   | 1229   | 1156   | 1194   |
| K03632 chromosome partition protein MukB                            | 2380   | 2490   | 2360   | 2512   | 1641   | 1864   | 1810   | 1696   | 3661   | 3591   | 3356   | 3642   |
| K03633 chromosome partition protein MukF                            | 716    | 758    | 721    | 699    | 571    | 495    | 512    | 523    | 920    | 1040   | 1009   | 1000   |
| K03733 integrase/recombinase XerC                                   | 2830   | 2719   | 2859   | 2801   | 3299   | 3292   | 3348   | 3424   | 3124   | 2899   | 2919   | 2916   |
| K03746 DNA-binding protein H-NS                                     | 311    | 350    | 343    | 343    | 278    | 323    | 289    | 255    | 418    | 433    | 434    | 485    |
| K03804 chromosome partition protein MukE                            | 398    | 362    | 372    | 393    | 264    | 274    | 284    | 273    | 539    | 560    | 563    | 576    |
| K03978 GTP-binding protein                                          | 1740   | 1747   | 1829   | 1743   | 2027   | 2042   | 2009   | 1885   | 1869   | 1917   | 1915   | 2011   |
| K04047 starvation-inducible DNA-binding protein                     | 1332   | 1243   | 1314   | 1233   | 1646   | 1664   | 1662   | 1716   | 1400   | 1359   | 1383   | 1304   |
| K04074 cell division initiation protein                             | 54     | 57     | 58     | 74     | 30     | 38     | 41     | 34     | 56     | 100    | 78     | 63     |
| K04095 cell filamentation protein                                   | 558    | 556    | 473    | 542    | 329    | 395    | 342    | 307    | 678    | 689    | 606    | 773    |
| K04763 integrase/recombinase XerD                                   | 2633   | 2665   | 2764   | 2729   | 3232   | 3281   | 3336   | 3182   | 3359   | 3467   | 3275   | 3226   |
| K05589 cell division protein FtsB                                   | 565    | 550    | 545    | 542    | 357    | 354    | 354    | 401    | 356    | 369    | 341    | 351    |
| K05837 rod shape determining protein RodA                           | 3830   | 4058   | 4098   | 4093   | 4749   | 4924   | 4912   | 4739   | 4470   | 4271   | 4329   | 4254   |
| K05896 segregation and condensation protein A                       | 1765   | 1740   | 1570   | 1756   | 824    | 844    | 811    | 782    | 768    | 874    | 796    | 841    |
| K06024 segregation and condensation protein B                       | 1625   | 1579   | 1523   | 1568   | 862    | 847    | 909    | 993    | 746    | 728    | 681    | 680    |
| K06286 septation ring formation regulator                           | 106    | 114    | 104    | 124    | 42     | 31     | 32     | 23     | 98     | 159    | 102    | 136    |
| K06899 nucleoid-associated protein                                  | 3001   | 3015   | 2958   | 2856   | 2158   | 2235   | 2085   | 2182   | 1552   | 1710   | 1701   | 1715   |
| K06916 cell division protein ZapE                                   | 5184   | 5146   | 4922   | 5163   | 2751   | 2688   | 2647   | 2840   | 3225   | 3138   | 3113   | 3099   |
| K09772 cell division inhibitor SepF                                 | 254    | 234    | 224    | 251    | 83     | 108    | 77     | 50     | 215    | 255    | 248    | 238    |
| K09888 cell division protein ZapA                                   | 1161   | 1130   | 1153   | 1071   | 1082   | 1038   | 1005   | 1141   | 1042   | 1125   | 1000   | 1023   |
| K09892 cell division protein ZapB                                   | 683    | 651    | 669    | 659    | 401    | 398    | 382    | 383    | 373    | 415    | 384    | 380    |
| K11267 sister chromatid cohesion protein PD55                       | 0      | 0      | 0      | 0      | 1      | 0      | 0      | 0      | 0      | 0      | 0      | 0      |
| K11274 chromosome transmission fidelity protein 4                   | 0      | 0      | 0      | 0      | 0      | 2      | 0      | 0      | 0      | 0      | 0      | 0      |
| K11396 chromatid modification-related protein YNG2                  | 0      | 2      | 0      | 0      | 0      | 0      | 0      | 0      | 0      | 0      | 0      | 0      |
| K11494 RCC1 and BTB domain-containing protein                       | 4      | 3      | 2      | 2      | 0      | 0      | 0      | 0      | 1      | 0      | 1      | 1      |
| K11673 actin-related protein 8                                      | 0      | 0      | 0      | 0      | 0      | 0      | 0      | 0      | 0      | 0      | 1      | 0      |
| K11685 DNA-binding protein StpA                                     | 137    | 142    | 138    | 158    | 59     | 62     | 42     | 48     | 342    | 334    | 353    | 372    |
| K11940 heat shock protein HspQ                                      | 213    | 164    | 184    | 199    | 118    | 143    | 140    | 135    | 271    | 276    | 281    | 293    |
| K12961 DnaA initiator-associating protein                           | 327    | 407    | 377    | 389    | 286    | 269    | 258    | 243    | 574    | 617    | 444    | 555    |
| K13052 cell division protein DivIC                                  | 51     | 31     | 30     | 43     | 2      | 21     | 3      | 9      | 48     | 35     | 34     | 36     |
| K13053 cell division inhibitor SulA                                 | 986    | 994</  |        |        |        |        |        |        |        |        |        |        |

|                                                                                        |         |         |         |         |         |         |         |         |         |         |         |         |
|----------------------------------------------------------------------------------------|---------|---------|---------|---------|---------|---------|---------|---------|---------|---------|---------|---------|
| ko03400 DNA repair and recombination proteins                                          | 411948  | 410576  | 410376  | 412556  | 402842  | 407222  | 405997  | 403014  | 407858  | 410156  | 410379  | 408771  |
| K00567 methylated-DNA-[protein]-cysteine S-methyltransferase [EC:2.1.1.63]             | 1684    | 1680    | 1778    | 1632    | 1960    | 1943    | 1952    | 1883    | 1808    | 1833    | 1819    | 1922    |
| K01160 crossover junction endodeoxyribonuclease RsaI [EC:3.1.22.4]                     | 104     | 100     | 114     | 121     | 143     | 192     | 169     | 161     | 68      | 77      | 81      | 61      |
| K01554 8-oxo-dGDP phosphatase [EC:3.6.1.58]                                            | 0       | 0       | 0       | 0       | 0       | 0       | 0       | 0       | 1       | 1       | 2       | 1       |
| K01669 deoxyribodipyrimidine photo-lyase [EC:4.1.99.3]                                 | 3191    | 3186    | 3009    | 3114    | 1839    | 1875    | 1794    | 2010    | 1818    | 1818    | 1839    | 2016    |
| K02336 DNA polymerase II [EC:2.7.7.7]                                                  | 3949    | 3857    | 3791    | 3818    | 2259    | 2170    | 2250    | 2253    | 2646    | 2819    | 2737    | 2800    |
| K02346 DNA polymerase IV [EC:2.7.7.7]                                                  | 3067    | 3189    | 3143    | 3199    | 3500    | 3641    | 3594    | 3485    | 4058    | 4154    | 4266    | 4237    |
| K02347 DNA polymerase (family X)                                                       | 3       | 0       | 2       | 1       | 0       | 0       | 0       | 0       | 0       | 0       | 0       | 0       |
| K03502 DNA polymerase V                                                                | 2395    | 2456    | 2395    | 2510    | 1939    | 2308    | 2196    | 2052    | 2687    | 2746    | 2620    | 2658    |
| K03546 DNA repair protein SbcC/Rad50                                                   | 7414    | 7508    | 7485    | 7672    | 9226    | 9480    | 9783    | 9107    | 8859    | 8461    | 8687    | 8576    |
| K03547 DNA repair protein SbcD/Mre11                                                   | 4770    | 4754    | 4857    | 4903    | 4971    | 4938    | 5068    | 4854    | 4891    | 5084    | 5054    | 4930    |
| K03552 Holliday junction resolvase Hjr [EC:3.1.22.4]                                   | 0       | 3       | 3       | 1       | 2       | 7       | 12      | 6       | 3       | 3       | 0       | 0       |
| K03554 recombination associated protein RdgC                                           | 1589    | 1600    | 1554    | 1630    | 977     | 1008    | 934     | 997     | 1097    | 1119    | 1108    | 1044    |
| K03565 regulatory protein                                                              | 1907    | 1844    | 1895    | 1923    | 2082    | 2144    | 2134    | 1936    | 1905    | 1726    | 1908    | 1809    |
| K03574 8-oxo-dGTP diphosphatase [EC:3.6.1.55]                                          | 3398    | 3384    | 3271    | 3459    | 1725    | 1766    | 1818    | 1754    | 1884    | 1891    | 1799    | 1900    |
| K03631 DNA repair protein RecN (Recombination protein N)                               | 5665    | 6045    | 5666    | 5678    | 6048    | 5758    | 5833    | 5811    | 5582    | 5245    | 5239    | 5293    |
| K03656 ATP-dependent DNA helicase Rep [EC:3.6.4.12]                                    | 4877    | 4823    | 4625    | 4869    | 2931    | 3008    | 3013    | 2892    | 3073    | 3046    | 2926    | 3036    |
| K03658 DNA helicase IV [EC:3.6.4.12]                                                   | 1268    | 1208    | 1245    | 1205    | 781     | 895     | 904     | 839     | 1518    | 1585    | 1447    | 1473    |
| K03700 recombination protein U                                                         | 278     | 261     | 240     | 266     | 82      | 72      | 94      | 67      | 217     | 292     | 202     | 265     |
| K03722 ATP-dependent DNA helicase DinG [EC:3.6.4.12]                                   | 6344    | 6227    | 6006    | 6172    | 3595    | 3628    | 3661    | 3753    | 4745    | 4902    | 4800    | 4769    |
| K03724 ATP-dependent helicase Lhr and Lhr-like helicase [EC:3.6.4.-]                   | 11378   | 11248   | 10753   | 11170   | 6527    | 6567    | 6273    | 6589    | 4624    | 4305    | 4271    | 4528    |
| K03919 DNA oxidative demethylase [EC:1.14.11.33]                                       | 360     | 378     | 370     | 378     | 251     | 327     | 315     | 282     | 523     | 506     | 556     | 546     |
| K04483 DNA repair protein RadA                                                         | 0       | 2       | 0       | 0       | 0       | 0       | 2       | 0       | 2       | 12      | 3       | 5       |
| K04484 DNA repair protein RadB                                                         | 1       | 0       | 2       | 1       | 1       | 0       | 0       | 0       | 4       | 0       | 3       | 5       |
| K04485 DNA repair protein RadA/Sms                                                     | 4215    | 4142    | 4280    | 4225    | 4866    | 4942    | 4895    | 4985    | 4669    | 4670    | 4839    | 4679    |
| K05982 deoxyribonuclease V [EC:3.1.21.7]                                               | 429     | 427     | 470     | 471     | 346     | 302     | 310     | 318     | 544     | 505     | 547     | 586     |
| K05984 exonuclease Cho [EC:3.1.25.-]                                                   | 434     | 463     | 432     | 481     | 293     | 372     | 314     | 283     | 623     | 606     | 602     | 684     |
| K07455 recombination protein RecT                                                      | 311     | 371     | 410     | 416     | 188     | 222     | 214     | 189     | 172     | 177     | 141     | 180     |
| K07458 DNA mismatch endonuclease, patch repair protein [EC:3.1.-.-]                    | 603     | 668     | 632     | 659     | 1445    | 1404    | 1500    | 1500    | 1348    | 1290    | 1293    | 1430    |
| K10906 exodeoxyribonuclease VIII [EC:3.1.11.-]                                         | 78      | 75      | 59      | 96      | 0       | 4       | 3       | 1       | 5       | 3       | 1       | 0       |
| K12149 DNA-damage-inducible protein I                                                  | 143     | 160     | 134     | 156     | 107     | 89      | 114     | 119     | 251     | 246     | 262     | 263     |
| K13531 methylated-DNA-[protein]-cysteine S-methyltransferase [EC:2.1.1.63]             | 25      | 15      | 10      | 18      | 16      | 16      | 6       | 4       | 16      | 16      | 17      | 15      |
| K14160 protein ImaA                                                                    | 0       | 0       | 0       | 0       | 2       | 0       | 0       | 2       | 2       | 2       | 3       | 0       |
| K14161 protein ImaB                                                                    | 2137    | 2024    | 2029    | 2181    | 1190    | 1066    | 1057    | 1241    | 700     | 647     | 658     | 624     |
| K14162 error-prone DNA polymerase [EC:2.7.7.7]                                         | 4188    | 4165    | 4180    | 4136    | 2446    | 2297    | 2223    | 2362    | 1445    | 1469    | 1233    | 1340    |
| K14623 DNA-damage-inducible protein D                                                  | 781     | 872     | 797     | 828     | 1713    | 1611    | 1765    | 1641    | 1923    | 1788    | 1764    | 1874    |
| K14635 ATP-dependent DNA helicase MPH1 [EC:3.6.4.12]                                   | 0       | 0       | 0       | 0       | 0       | 0       | 0       | 1       | 0       | 0       | 0       | 0       |
| K15083 DNA repair protein RAD16                                                        | 0       | 0       | 0       | 0       | 0       | 0       | 0       | 0       | 0       | 1       | 0       | 0       |
| K15342 CRISPR-associated protein Cas1                                                  | 1315    | 1290    | 1343    | 1315    | 871     | 839     | 829     | 833     | 1332    | 1443    | 1448    | 1433    |
| K15505 DNA repair protein RAD5 [EC:3.6.4.-]                                            | 0       | 0       | 1       | 0       | 0       | 0       | 0       | 0       | 0       | 0       | 0       | 0       |
| K16898 ATP-dependent helicase/nuclease subunit A [EC:3.1.-.-: 3.6.4.12]                | 1673    | 1588    | 1653    | 1628    | 528     | 494     | 488     | 500     | 1500    | 1730    | 1529    | 1664    |
| K16899 ATP-dependent helicase/nuclease subunit B [EC:3.1.-.-: 3.6.4.12]                | 1490    | 1466    | 1439    | 1459    | 511     | 519     | 484     | 459     | 1288    | 1617    | 1398    | 1557    |
| K17816 8-oxo-dGTP diphosphatase / 2'-hydroxy-dATP diphosphatase [EC:3.6.1.55 3.6.1.56] | 2       | 0       | 2       | 0       | 0       | 2       | 0       | 0       | 0       | 0       | 0       | 0       |
| K19789 DNA repair protein RadD                                                         | 1025    | 1036    | 895     | 1019    | 670     | 772     | 725     | 633     | 1307    | 1431    | 1413    | 1422    |
| K22585 DNA repair protein NreA                                                         | 0       | 0       | 2       | 1       | 0       | 1       | 0       | 0       | 8       | 7       | 8       | 12      |
| K22803 structural maintenance of chromosomes protein 5                                 | 0       | 0       | 0       | 0       | 0       | 0       | 0       | 0       | 0       | 0       | 0       | 0       |
| K23258 8-oxo-dGTP phosphatase [EC:3.6.1.-]                                             | 6       | 5       | 7       | 1       | 7       | 2       | 8       | 7       | 8       | 10      | 12      | 9       |
| K23387 golgi to ER traffic protein 4                                                   | 0       | 1       | 0       | 0       | 0       | 0       | 0       | 0       | 0       | 0       | 0       | 0       |
| ko03029 Mitochondrial biogenesis                                                       | 136544  | 136136  | 139445  | 138257  | 146275  | 148240  | 147226  | 146676  | 136714  | 137422  | 136852  | 136371  |
| K07152 protein SCO1/2                                                                  | 1060    | 1040    | 963     | 1046    | 608     | 552     | 571     | 653     | 332     | 327     | 334     | 319     |
| K07277 outer membrane protein insertion porin family                                   | 7870    | 7983    | 8335    | 8113    | 9370    | 9474    | 9494    | 9579    | 9689    | 9646    | 9526    | 9529    |
| K10908 DNA-directed RNA polymerase, mitochondrial [EC:2.7.7.6]                         | 0       | 0       | 0       | 0       | 0       | 0       | 0       | 1       | 0       | 0       | 0       | 0       |
| K14998 surfet locus 1 family protein                                                   | 3       | 2       | 1       | 0       | 1       | 2       | 0       | 0       | 1       | 4       | 3       | 4       |
| K15980 acyl-CoA dehydrogenase family member 9 [EC:1.3.99.-]                            | 1       | 0       | 1       | 1       | 0       | 0       | 0       | 0       | 1       | 0       | 0       | 0       |
| K17662 cytochrome b pre-mRNA-processing protein 3                                      | 0       | 0       | 1       | 0       | 3       | 0       | 1       | 0       | 3       | 2       | 1       | 0       |
| K17675 ATP-dependent RNA helicase SUPV3L1/SUV3 [EC:3.6.4.13]                           | 113     | 93      | 97      | 106     | 81      | 89      | 79      | 68      | 71      | 97      | 80      | 79      |
| K17677 ATP-dependent helicase IRC3 [EC:3.6.4.-]                                        | 0       | 0       | 2       | 0       | 0       | 0       | 0       | 0       | 0       | 0       | 0       | 0       |
| K17679 ATP-dependent RNA helicase MSS116, mitochondrial [EC:3.6.4.13]                  | 0       | 0       | 1       | 0       | 0       | 0       | 0       | 0       | 0       | 0       | 0       | 0       |
| K17680 twinkle protein [EC:3.6.4.12]                                                   | 390     | 474     | 454     | 389     | 551     | 604     | 508     | 568     | 55      | 62      | 94      | 63      |
| K17768 mitochondrial import receptor subunit TOM70                                     | 0       | 0       | 2       | 0       | 0       | 0       | 0       | 0       | 0       | 0       | 0       | 0       |
| K17807 mitochondrial translocator assembly and maintenance protein 41                  | 0       | 0       | 1       | 0       | 0       | 0       | 0       | 0       | 0       | 0       | 0       | 0       |
| K17970 mitochondrial division protein 1                                                | 0       | 0       | 0       | 0       | 0       | 0       | 0       | 0       | 0       | 2       | 0       | 0       |
| K21594 translation factor GUF1, mitochondrial [EC:3.6.5.-]                             | 1       | 0       | 3       | 0       | 3       | 2       | 1       | 6       | 0       | 3       | 0       | 0       |
| K22140 dynamin-like GTPase MGM1, mitochondrial                                         | 0       | 0       | 0       | 0       | 0       | 1       | 0       | 0       | 0       | 0       | 2       | 0       |
| K23164 reticulon-4-interacting protein 1, mitochondrial                                | 0       | 0       | 0       | 0       | 0       | 1       | 0       | 0       | 0       | 0       | 0       | 0       |
| Protein families: signaling and cellular processes                                     | 3127866 | 3111743 | 3058229 | 3107297 | 2539357 | 2559854 | 2507899 | 2546416 | 2706008 | 2727809 | 2678755 | 2727025 |
| ko02000 Transporters                                                                   | 1995062 | 1986872 | 1951522 | 1985628 | 1667605 | 1682584 | 1655177 | 1673328 | 1836688 | 1854918 | 1822917 | 1858054 |
| K00427 L-lactate permease                                                              | 737     | 674     | 752     | 728     | 201     | 229     | 209     | 219     | 1513    | 1507    | 1530    | 1450    |
| K01551 arsenite/tail-anchored protein-transporting ATPase [EC:7.3.2.7 7.3.-.-]         | 1647    | 1525    | 1526    | 1657    | 2639    | 2848    | 2865    | 2629    | 534     | 457     | 528     | 528     |
| K01604 methylmalonyl-CoA decarboxylase subunit alpha [EC:7.2.4.3]                      | 1567    | 1633    | 1821    | 1719    | 3293    | 3430    | 3455    | 3250    | 3173    | 3189    | 3215    | 3053    |
| K01989 putative ABC transport system substrate-binding protein                         | 2450    | 2435    | 2356    | 2419    | 1299    | 1313    | 1229    | 1270    | 1383    | 1400    | 1364    | 1430    |
| K01990 ABC-2 type transport system ATP-binding protein                                 | 15758   | 15670   | 15717   | 16004   | 15108   | 15149   | 15054   | 14821   | 19362   | 19930   | 19765   | 19895   |
| K01992 ABC-2 type transport system permease protein                                    | 20466   | 20595   | 20855   | 20092   | 28545   | 28480   | 28914   | 28787   | 27918   | 27762   | 27673   | 27841   |
| K02003 putative ABC transport system ATP-binding protein                               | 12512   | 12289   | 12210   | 12554   | 11986   | 11650   | 11653   | 11749   | 13459   | 13674   | 13478   | 14122   |
| K02004 putative ABC transport system permease protein                                  | 22775   | 22823   | 22800   | 22817   | 23143   | 23266   | 23652   | 23184   | 25120   | 25598   | 25341   | 25783   |
| K02013 iron complex transport system ATP-binding protein [EC:7.2.2.-]                  | 9086    | 8997    | 8964    | 8831    | 8791    | 9058    | 8858    | 8963    | 9179    | 9113    | 9242    | 9142    |
| K02014 iron complex outer-membrane receptor protein                                    | 74685   | 75008   | 71861   | 73145   | 55889   | 54739   | 53641   | 57046   | 42642   | 40910   | 40986   | 41452   |
| K02015 iron complex transport system permease protein                                  | 15581   | 15376   | 14840   | 15255   | 13547   | 13429   | 13594   | 13981   | 13661   | 13643   | 13634   | 14060   |
| K02016 iron complex transport system substrate-binding protein                         | 10307   | 10105   | 9747    | 10109   | 9270    | 9194    | 8895    | 9323    | 9705    | 9900    | 10011   | 9985    |
| K02021 putative ABC transport system ATP-binding protein                               | 0       | 0       | 0       | 0       | 0       | 0       | 0       | 1       | 0       | 0       | 0       | 0       |
| K02024 maltoporin                                                                      | 2821    | 2761    | 2790    | 2888    | 1824    | 1984    | 1809    | 1807    | 3894    | 4069    | 3954    | 4337    |
| K02025 multiple sugar transport system permease protein                                | 15750   | 14967   | 15375   | 15583   | 3515    | 3592    | 3316    | 3153    | 14524   | 15090   | 14914   | 15610   |
| K02026 multiple sugar transport system permease protein                                | 14983   | 14174   | 14635   | 14438   | 3272    | 3438    | 3271    | 3016    | 13812   | 15708   | 14519   | 15180   |
| K02027 multiple sugar transport system substrate-binding protein                       | 15180   | 15003   | 15202   | 15533   | 3487    | 3748    | 3633    | 3343    | 14730   | 16296   | 15827   | 15828   |
| K02028 polar amino acid transport system ATP-binding protein [EC:7.4.2.1]              | 4117    | 3916    | 3601    | 4002    | 2076    | 2095    | 2159    | 1978    | 4158    | 4258    | 4157    | 4270    |
| K02029 polar amino acid transport system permease protein                              | 7663    | 7491    | 7173    | 7462    | 4810    | 4782    | 4689    | 4730    | 5456    | 5759    | 5260    | 5718    |
| K02030 polar amino acid transport system substrate-binding protein                     | 16306   | 16048   | 15482   | 16113   | 9011    | 9297    | 8854    | 9580    | 9705    | 9683    | 9481    | 9826    |
| K02049 NiT/TauT family transport system ATP-binding protein                            | 5457    | 5256    | 5017    | 5182    | 2847    | 3150    | 2750    | 2977    | 3519    | 3559    | 3351    | 3740    |
| K02050 NiT/TauT family transport system permease protein                               | 5152    | 5028    | 4570    | 4919    | 2990    | 3106    | 2963    | 3000    | 3271    | 3301    | 3097    | 3453    |
| K02051 NiT/TauT family transport system substrate-binding protein                      | 6936    | 6693    | 6507    | 6882    | 5262    | 5221    | 5086    | 5341    | 6081    | 6169    | 5933    | 6209    |
| K02056 simple sugar transport system ATP-binding protein [EC:7.5.2.-]                  | 8099    | 7744    | 7591    | 7783    | 4083    | 4169    | 4000    | 4108    | 6604    | 6868    | 6519    | 6897    |
| K02057 simple sugar transport system permease protein                                  | 9377    | 8980    | 8559    | 9025    | 4311    | 4480    | 4352    | 4369    | 6831    | 7336    | 6895    | 7344    |
| K02058 simple sugar transport system substrate-binding protein                         | 3564    | 3368    | 3234    | 3404    | 2143    | 2125    | 1991    | 2156    | 2765    | 2740    | 2582    | 2697    |
| K02068 putative ABC transport system ATP-binding protein                               | 699     | 673     | 715     | 701     | 1391    | 1238    | 1296    | 1243    | 1431    | 1430    | 1452    | 1511    |
| K02069 putative ABC transport system permease protein                                  | 805     | 820     | 843     | 889     | 1650    | 1626    | 1614    | 1681    | 1781    | 1867    | 1749    | 1688    |
| K02074 zinc/manganese transport system ATP-binding protein                             | 528     | 513     | 453     | 543     | 300     | 307     | 326     | 322     | 667     | 842     | 721     | 743     |
| K02075 zinc/manganese transport system permease protein                                | 497     | 487     | 498     | 512     | 311     | 334     | 297     | 341     | 650     | 616     | 630     | 669     |
| K02077 zinc/manganese transport system substrate-binding protein                       | 508     | 519     | 525     | 549     | 382     | 375     | 359     | 368     | 609     | 624     | 660     | 682     |
| K02100 MFS transporter, SP family, arabinose:H <sup>+</sup> symporter                  | 774     | 766     | 711     | 848     | 534     | 556     | 565     | 508     | 1242    | 1235    | 1169    | 1190    |
| K02168 ch                                                                              |         |         |         |         |         |         |         |         |         |         |         |         |

|                                                                                  |       |       |       |       |       |      |       |       |       |       |       |       |
|----------------------------------------------------------------------------------|-------|-------|-------|-------|-------|------|-------|-------|-------|-------|-------|-------|
| K03298 drug/metabolite transporter, DME family                                   | 1     | 2     | 2     | 3     | 3     | 1    | 2     | 0     | 3     | 2     | 3     | 4     |
| K03299 gluconate:H <sup>+</sup> symporter, GntP family                           | 5605  | 5622  | 5726  | 5728  | 4772  | 4715 | 4596  | 4503  | 4696  | 4761  | 4722  | 4740  |
| K03303 lactate permease                                                          | 3725  | 3487  | 3765  | 3611  | 4623  | 4673 | 4454  | 4498  | 3263  | 3066  | 3295  | 3077  |
| K03304 tellurite resistance protein                                              | 500   | 510   | 533   | 550   | 348   | 346  | 381   | 338   | 855   | 734   | 733   | 737   |
| K03312 glutamate:Na <sup>+</sup> symporter, ESS family                           | 2624  | 2500  | 2466  | 2458  | 1298  | 1495 | 1243  | 1414  | 1744  | 1808  | 1587  | 1820  |
| K03313 Na <sup>+</sup> :H <sup>+</sup> antiporter, NhaA family                   | 1835  | 1825  | 1790  | 1764  | 3329  | 3245 | 3426  | 3241  | 2793  | 2685  | 2725  | 2706  |
| K03314 Na <sup>+</sup> :H <sup>+</sup> antiporter, NhaB family                   | 1214  | 1199  | 1188  | 1134  | 500   | 480  | 443   | 419   | 1496  | 1456  | 1372  | 1491  |
| K03315 Na <sup>+</sup> :H <sup>+</sup> antiporter, NhaC family                   | 2338  | 2446  | 2629  | 2346  | 3157  | 3165 | 3298  | 3195  | 3753  | 3865  | 3740  | 3579  |
| K03318 tyrosine permease                                                         | 0     | 2     | 1     | 2     | 0     | 2    | 0     | 0     | 0     | 0     | 1     | 0     |
| K03320 ammonium transporter, Amt family                                          | 5470  | 5357  | 5260  | 5303  | 3946  | 4077 | 4340  | 4357  | 4263  | 4364  | 4142  | 4165  |
| K03321 sulfate permease, SulP family                                             | 8560  | 8442  | 8326  | 8405  | 8420  | 8404 | 8154  | 8151  | 7011  | 6808  | 6710  | 6796  |
| K03322 manganese transport protein                                               | 5824  | 5632  | 5244  | 5491  | 5080  | 5096 | 5105  | 5301  | 4239  | 4111  | 3976  | 4098  |
| K03324 phosphate:Na <sup>+</sup> symporter                                       | 10364 | 10191 | 9896  | 10012 | 8454  | 8660 | 7977  | 8418  | 7764  | 7604  | 7419  | 7624  |
| K03325 arsenite transporter                                                      | 409   | 473   | 505   | 451   | 1508  | 1367 | 1427  | 1385  | 1207  | 1178  | 1188  | 1129  |
| K03326 C4-dicarboxylate transporter, DcuC family                                 | 1668  | 1709  | 1655  | 1711  | 1528  | 1685 | 1545  | 1617  | 2607  | 2640  | 2617  | 2735  |
| K03327 multidrug resistance protein, MATE family                                 | 9981  | 9976  | 9482  | 9723  | 10092 | 9956 | 10059 | 10504 | 8810  | 8311  | 8595  | 8584  |
| K03329 amino acid exporter                                                       | 2     | 0     | 0     | 1     | 7     | 8    | 3     | 12    | 39    | 37    | 41    | 31    |
| K03442 small conductance mechanosensitive channel                                | 2944  | 2959  | 2712  | 2837  | 3050  | 3270 | 3217  | 3236  | 2817  | 2883  | 2812  | 2819  |
| K03444 MFS transporter, SP family, sugar porter, other                           | 0     | 2     | 5     | 0     | 0     | 2    | 2     | 0     | 2     | 0     | 0     | 0     |
| K03445 MFS transporter, DHA1 family, purine ribonucleoside efflux pump           | 797   | 824   | 734   | 786   | 559   | 617  | 570   | 516   | 1272  | 1245  | 1148  | 1264  |
| K03446 MFS transporter, DHA2 family, multidrug resistance protein                | 9206  | 8877  | 8779  | 8837  | 5603  | 5810 | 5574  | 5735  | 4422  | 4657  | 4267  | 4615  |
| K03449 MFS transporter, CP family, cyanate transporter                           | 5985  | 6012  | 5416  | 5870  | 3325  | 3363 | 3250  | 3636  | 3339  | 3247  | 3187  | 3375  |
| K03459 formate transporter                                                       | 0     | 0     | 0     | 0     | 11    | 7    | 8     | 7     | 5     | 4     | 8     | 3     |
| K03468 p-hydroxybenzoic acid efflux pump subunit AaeB                            | 1189  | 1229  | 1197  | 1251  | 923   | 997  | 850   | 872   | 1650  | 1737  | 1655  | 1666  |
| K03498 trk system potassium uptake protein                                       | 6540  | 6150  | 6474  | 6269  | 5396  | 5499 | 5585  | 5508  | 6476  | 6752  | 6624  | 6798  |
| K03499 trk system potassium uptake protein                                       | 6363  | 6470  | 6526  | 6353  | 6863  | 6957 | 6645  | 6717  | 7071  | 7199  | 7105  | 7179  |
| K03535 MFS transporter, ACS family, glucarate transporter                        | 1619  | 1656  | 1678  | 1786  | 1413  | 1614 | 1457  | 1437  | 2032  | 1958  | 1896  | 2057  |
| K03543 membrane fusion protein, multidrug efflux system                          | 7714  | 7735  | 7525  | 7461  | 6920  | 6632 | 6362  | 6499  | 5176  | 5201  | 4948  | 5145  |
| K03548 putative permease                                                         | 2158  | 2040  | 2087  | 2085  | 1276  | 1260 | 1227  | 1277  | 1273  | 1292  | 1279  | 1291  |
| K03549 KUP system potassium uptake protein                                       | 4586  | 4672  | 4569  | 4721  | 3150  | 3239 | 3066  | 3190  | 3050  | 3007  | 2901  | 3025  |
| K03559 biopolymer transporter protein ExbD                                       | 2244  | 2081  | 2169  | 2197  | 3395  | 3416 | 3444  | 3359  | 2556  | 2630  | 2631  | 2471  |
| K03560 biopolymer transport protein TolR                                         | 1607  | 1454  | 1406  | 1486  | 844   | 839  | 803   | 889   | 738   | 686   | 657   | 725   |
| K03561 biopolymer transporter protein ExbB                                       | 6350  | 6278  | 6177  | 6103  | 9149  | 8671 | 9081  | 8991  | 6613  | 6411  | 6445  | 6502  |
| K03562 biopolymer transport protein TolQ                                         | 1405  | 1417  | 1511  | 1494  | 932   | 940  | 853   | 895   | 893   | 959   | 937   | 915   |
| K03640 peptidoglycan-associated lipoprotein                                      | 984   | 1048  | 1071  | 1114  | 689   | 603  | 669   | 661   | 719   | 752   | 740   | 699   |
| K03641 TolB protein                                                              | 2490  | 2392  | 2443  | 2496  | 1436  | 1609 | 1506  | 1480  | 1707  | 1703  | 1614  | 1722  |
| K03643 LPS-assembly lipoprotein                                                  | 1026  | 1053  | 957   | 1058  | 656   | 662  | 532   | 633   | 714   | 723   | 733   | 764   |
| K03646 colicin import membrane protein                                           | 1151  | 1163  | 1235  | 1255  | 669   | 696  | 661   | 648   | 1004  | 1074  | 1001  | 992   |
| K03756 putrescine:ornithine antiporter                                           | 183   | 167   | 175   | 148   | 246   | 264  | 231   | 265   | 310   | 330   | 315   | 345   |
| K03757 cadaverine:lysine antiporter                                              | 724   | 696   | 654   | 695   | 396   | 380  | 357   | 353   | 1388  | 1519  | 1472  | 1418  |
| K03758 arginine:ornithine antiporter / lysine permease                           | 3851  | 3720  | 3725  | 3926  | 2251  | 2275 | 2097  | 2397  | 2066  | 2062  | 1916  | 2060  |
| K03759 arginine:agmatine antiporter                                              | 41    | 54    | 43    | 41    | 29    | 34   | 24    | 16    | 166   | 187   | 193   | 181   |
| K03761 MFS transporter, MHS family, alpha-ketoglutarate permease                 | 2882  | 3020  | 2856  | 2800  | 1727  | 1758 | 1736  | 1748  | 1683  | 1785  | 1751  | 1797  |
| K03762 MFS transporter, MHS family, proline/betaine transporter                  | 1432  | 1378  | 1372  | 1480  | 1380  | 1417 | 1344  | 1273  | 1318  | 1444  | 1396  | 1353  |
| K03811 nicotinamide mononucleotide transporter                                   | 1727  | 1670  | 1593  | 1689  | 1730  | 1744 | 2044  | 2038  | 1677  | 1723  | 1669  | 1723  |
| K03832 periplasmic protein TonB                                                  | 5242  | 5066  | 5309  | 5333  | 8523  | 8533 | 8739  | 8627  | 6280  | 6128  | 6475  | 6249  |
| K03834 tyrosine-specific transport protein                                       | 671   | 660   | 586   | 702   | 468   | 543  | 483   | 438   | 938   | 1060  | 986   | 1014  |
| K03835 tryptophan-specific transport protein                                     | 3550  | 3747  | 3515  | 3612  | 2640  | 2562 | 2478  | 2591  | 1885  | 1904  | 1754  | 1912  |
| K03836 low affinity tryptophan permease                                          | 2     | 6     | 5     | 8     | 17    | 25   | 13    | 13    | 98    | 105   | 102   | 90    |
| K03837 serine transporter                                                        | 1399  | 1389  | 1342  | 1364  | 1083  | 1141 | 992   | 1048  | 1845  | 2085  | 1828  | 1884  |
| K03838 threonine transporter                                                     | 385   | 417   | 384   | 378   | 121   | 125  | 130   | 111   | 875   | 885   | 883   | 877   |
| K03893 arsenical pump membrane protein                                           | 2613  | 2575  | 2335  | 2528  | 1977  | 2109 | 2184  | 2086  | 1312  | 1388  | 1373  | 1355  |
| K04744 LPS-assembly protein                                                      | 6170  | 6260  | 6331  | 6229  | 3878  | 3815 | 3648  | 3765  | 3632  | 3815  | 3658  | 3821  |
| K04758 ferrous iron transport protein A                                          | 991   | 1040  | 991   | 951   | 457   | 508  | 485   | 495   | 801   | 922   | 842   | 920   |
| K04759 ferrous iron transport protein B                                          | 10206 | 10046 | 10215 | 10310 | 9331  | 9607 | 9350  | 9480  | 10819 | 10835 | 10638 | 10977 |
| K05020 glycine betaine transporter                                               | 153   | 115   | 118   | 114   | 105   | 121  | 119   | 133   | 227   | 259   | 265   | 265   |
| K05041 solute carrier family 6 (neurotransmitter transporter, creatine) member 8 | 3     | 2     | 0     | 0     | 0     | 0    | 0     | 0     | 0     | 0     | 0     | 0     |
| K05245 L-carnitine/gamma-butyrobetaine antiporter                                | 389   | 319   | 354   | 308   | 530   | 588  | 507   | 538   | 108   | 121   | 133   | 130   |
| K05340 glucose uptake protein                                                    | 757   | 796   | 807   | 864   | 2381  | 2347 | 2435  | 2335  | 1661  | 1621  | 1716  | 1618  |
| K05373 MFS transporter, putative signal transducer                               | 485   | 478   | 485   | 512   | 123   | 158  | 162   | 147   | 1052  | 1205  | 1132  | 1154  |
| K05517 nucleoside-specific channel-forming protein                               | 2010  | 2036  | 1878  | 1806  | 1184  | 1119 | 1063  | 1280  | 1248  | 1271  | 1165  | 1244  |
| K05548 MFS transporter, AAHS family, benzoate transport protein                  | 2175  | 2258  | 2068  | 2029  | 1153  | 1221 | 1182  | 1266  | 749   | 659   | 622   | 676   |
| K05559 multicomponent K <sup>+</sup> :H <sup>+</sup> antiporter subunit A        | 3964  | 3873  | 3827  | 3762  | 2130  | 2136 | 1861  | 2126  | 1275  | 1204  | 1092  | 1171  |
| K05560 multicomponent K <sup>+</sup> :H <sup>+</sup> antiporter subunit C        | 529   | 491   | 473   | 459   | 295   | 331  | 267   | 280   | 159   | 155   | 136   | 152   |
| K05561 multicomponent K <sup>+</sup> :H <sup>+</sup> antiporter subunit D        | 2215  | 2234  | 2132  | 2167  | 1164  | 1166 | 1210  | 1241  | 707   | 623   | 683   | 711   |
| K05562 multicomponent K <sup>+</sup> :H <sup>+</sup> antiporter subunit E        | 653   | 649   | 657   | 753   | 364   | 367  | 299   | 265   | 229   | 215   | 197   | 200   |
| K05563 multicomponent K <sup>+</sup> :H <sup>+</sup> antiporter subunit F        | 367   | 361   | 393   | 369   | 205   | 188  | 207   | 184   | 126   | 103   | 108   | 124   |
| K05564 multicomponent K <sup>+</sup> :H <sup>+</sup> antiporter subunit G        | 490   | 542   | 457   | 536   | 300   | 219  | 276   | 278   | 177   | 134   | 180   | 156   |
| K05565 multicomponent Na <sup>+</sup> :H <sup>+</sup> antiporter subunit A       | 1     | 2     | 2     | 1     | 0     | 0    | 0     | 0     | 0     | 0     | 0     | 0     |
| K05566 multicomponent Na <sup>+</sup> :H <sup>+</sup> antiporter subunit B       | 119   | 121   | 108   | 113   | 50    | 43   | 56    | 40    | 148   | 138   | 151   | 124   |
| K05567 multicomponent Na <sup>+</sup> :H <sup>+</sup> antiporter subunit C       | 74    | 58    | 65    | 64    | 31    | 23   | 12    | 22    | 99    | 104   | 79    | 87    |
| K05568 multicomponent Na <sup>+</sup> :H <sup>+</sup> antiporter subunit D       | 592   | 495   | 509   | 530   | 230   | 240  | 191   | 195   | 597   | 684   | 635   | 623   |
| K05569 multicomponent Na <sup>+</sup> :H <sup>+</sup> antiporter subunit E       | 82    | 89    | 72    | 74    | 27    | 40   | 22    | 22    | 117   | 121   | 117   | 106   |
| K05570 multicomponent Na <sup>+</sup> :H <sup>+</sup> antiporter subunit F       | 21    | 19    | 9     | 17    | 7     | 11   | 14    | 19    | 26    | 24    | 19    | 17    |
| K05571 multicomponent Na <sup>+</sup> :H <sup>+</sup> antiporter subunit G       | 29    | 19    | 22    | 23    | 16    | 10   | 35    | 11    | 38    | 30    | 23    | 26    |
| K05595 multiple antibiotic resistance protein                                    | 2176  | 2216  | 2201  | 2123  | 3491  | 3475 | 3544  | 3680  | 2647  | 2602  | 2748  | 2655  |
| K05772 putative thiamine transport system substrate-binding protein              | 450   | 451   | 431   | 458   | 103   | 103  | 99    | 134   | 941   | 868   | 864   | 917   |
| K05778 putative thiamine transport system permease protein                       | 460   | 473   | 431   | 509   | 95    | 102  | 121   | 146   | 997   | 927   | 918   | 929   |
| K05779 putative thiamine transport system ATP-binding protein                    | 233   | 226   | 194   | 270   | 57    | 55   | 65    | 74    | 499   | 499   | 513   | 581   |
| K05782 benzoate membrane transport protein                                       | 2391  | 2293  | 2342  | 2302  | 1343  | 1337 | 1270  | 1283  | 1405  | 1384  | 1340  | 1466  |
| K05786 chloramphenicol-sensitive protein RarD                                    | 2529  | 2480  | 2332  | 2411  | 1582  | 1562 | 1541  | 1496  | 1380  | 1367  | 1365  | 1341  |
| K05802 potassium-dependent mechanosensitive channel                              | 7130  | 7157  | 6815  | 7210  | 4297  | 4188 | 4067  | 4150  | 4362  | 4353  | 4331  | 4320  |
| K05807 outer membrane protein assembly factor BamD                               | 2483  | 2383  | 2464  | 2572  | 2697  | 2900 | 2799  | 2791  | 2383  | 2225  | 2295  | 2322  |
| K05819 MFS transporter, AAHS family, 3-hydroxyphenylpropionic acid transporter   | 423   | 463   | 368   | 427   | 104   | 115  | 107   | 112   | 832   | 805   | 825   | 811   |
| K05820 MFS transporter, PPP family, 3-phenylpropionic acid transporter           | 3792  | 3807  | 3481  | 3587  | 2134  | 2038 | 1975  | 2213  | 2035  | 1943  | 1807  | 2210  |
| K05832 putative ABC transport system permease protein                            | 2073  | 2138  | 2061  | 2103  | 1077  | 1077 | 1084  | 1111  | 1065  | 1157  | 1156  | 1130  |
| K05833 putative ABC transport system ATP-binding protein                         | 1715  | 1895  | 1835  | 1729  | 897   | 891  | 877   | 931   | 988   | 1219  | 1040  | 1030  |
| K05834 homoserine/homoserine lactone efflux protein                              | 1323  | 1336  | 1248  | 1327  | 835   | 816  | 759   | 868   | 787   | 784   | 793   | 821   |
| K05835 threonine efflux protein                                                  | 367   | 302   | 313   | 317   | 263   | 311  | 262   | 266   | 381   | 433   | 374   | 388   |
| K06076 long-chain fatty acid transport protein                                   | 5265  | 5057  | 5127  | 5149  | 5055  | 5389 | 5338  | 5314  | 4313  | 4297  | 4295  | 4267  |
| K06141 MFS transporter, TsgA protein                                             | 452   | 470   | 498   | 463   | 138   | 186  | 157   | 163   | 1062  | 1034  | 982   | 1028  |
| K06144 universal stress protein B                                                | 204   | 205   | 174   | 185   | 173   | 127  | 137   | 144   | 279   | 308   | 287   | 280   |
| K06147 ATP-binding cassette, subfamily B, bacterial                              | 22047 | 21960 | 22237 | 22378 | 8890  | 9173 | 8919  | 8750  | 20780 | 22532 | 21125 | 22209 |
| K06148 ATP-binding cassette, subfamily C, bacterial                              | 2179  | 2109  | 1971  | 1957  | 1109  | 1051 | 1085  | 1215  | 726   | 694   | 631   | 734   |
| K06155 Gnt-I system high-affinity gluconate transporter                          | 769   | 846   | 784   | 900   | 514   | 674  | 592   | 580   | 1052  | 1145  | 1024  | 1103  |
| K06156 Gnt-I system low-affinity gluconate transporter                           | 971   | 998   | 988   | 1027  | 688   | 645  | 606   | 657   | 1271  | 1266  | 1196  | 1203  |
| K06157 Gnt-II system L-idonate transporter                                       | 286   | 308   | 283   | 296   | 441   | 477  | 406   | 385   | 66    | 85    | 87    | 74    |
| K06186 outer membrane protein assembly factor BamE                               | 1024  | 951   |       |       |       |      |       |       |       |       |       |       |

|                                                                                                        |      |      |      |      |      |      |      |      |      |      |      |      |
|--------------------------------------------------------------------------------------------------------|------|------|------|------|------|------|------|------|------|------|------|------|
| K07238 zinc transporter, ZIP family                                                                    | 2672 | 2497 | 2512 | 2581 | 1457 | 1481 | 1406 | 1416 | 1696 | 1668 | 1648 | 1782 |
| K07240 chromate transporter                                                                            | 4549 | 4438 | 4569 | 4682 | 6586 | 6715 | 6742 | 6610 | 4796 | 4602 | 4623 | 4666 |
| K07241 nickel/cobalt transporter (NiCoT) family protein                                                | 396  | 426  | 354  | 482  | 107  | 114  | 114  | 104  | 806  | 792  | 792  | 827  |
| K07243 high-affinity iron transporter                                                                  | 4349 | 4305 | 4301 | 4236 | 2865 | 2995 | 2734 | 2947 | 1833 | 1732 | 1686 | 1842 |
| K07244 mgT-like transporter                                                                            | 0    | 3    | 0    | 0    | 3    | 0    | 2    | 3    | 6    | 3    | 1    | 12   |
| K07245 copper resistance protein D                                                                     | 808  | 785  | 772  | 836  | 707  | 851  | 852  | 758  | 685  | 662  | 734  | 736  |
| K07267 porin                                                                                           | 5767 | 5637 | 5273 | 5421 | 2752 | 2954 | 2669 | 2936 | 2663 | 2380 | 2478 | 2559 |
| K07274 MipA family protein                                                                             | 379  | 403  | 409  | 461  | 310  | 312  | 327  | 349  | 632  | 647  | 643  | 622  |
| K07278 translocation and assembly module TamA                                                          | 3693 | 3687 | 3613 | 3750 | 2206 | 2290 | 2105 | 2196 | 2327 | 2400 | 2346 | 2417 |
| K07279 autotransporter family porin                                                                    | 8    | 9    | 4    | 15   | 42   | 32   | 26   | 38   | 182  | 173  | 200  | 205  |
| K07287 outer membrane protein assembly factor BamC                                                     | 1507 | 1515 | 1549 | 1611 | 964  | 1045 | 996  | 1039 | 1101 | 1230 | 1169 | 1173 |
| K07300 Ca2+-H+ antiporter                                                                              | 547  | 549  | 518  | 584  | 411  | 342  | 384  | 387  | 754  | 805  | 764  | 780  |
| K07301 cation:H+ antiporter                                                                            | 1288 | 1339 | 1463 | 1313 | 2777 | 2802 | 2966 | 2833 | 2666 | 2661 | 2800 | 2536 |
| K07311 Tat-targeted selenate reductase subunit YnfG                                                    | 3    | 1    | 6    | 1    | 4    | 11   | 0    | 5    | 29   | 22   | 21   | 23   |
| K07312 Tat-targeted selenate reductase subunit YnfH                                                    | 452  | 487  | 461  | 486  | 313  | 373  | 377  | 330  | 662  | 617  | 590  | 671  |
| K07490 ferrous iron transport protein C                                                                | 337  | 371  | 368  | 374  | 215  | 189  | 283  | 294  | 262  | 269  | 244  | 245  |
| K07507 putative Mg2+ transporter-C (MgtC) family protein                                               | 4279 | 4250 | 4062 | 4178 | 3228 | 3304 | 3154 | 3275 | 2850 | 2748 | 2811 | 2671 |
| K07552 MFS transporter, DHA1 family, multidrug resistance protein                                      | 4107 | 4112 | 3907 | 4048 | 2400 | 2347 | 2044 | 2122 | 2941 | 3107 | 2914 | 2976 |
| K07791 anaerobic C4-dicarboxylate transporter DcuA                                                     | 1670 | 1719 | 1808 | 1732 | 3848 | 3807 | 3894 | 3723 | 3296 | 3329 | 3405 | 3388 |
| K07862 serine/threonine transporter                                                                    | 1389 | 1466 | 1322 | 1382 | 945  | 1031 | 933  | 958  | 1512 | 1526 | 1429 | 1530 |
| K08137 MFS transporter, SP family, galactose:H+ symporter                                              | 816  | 819  | 849  | 888  | 578  | 668  | 575  | 592  | 1198 | 1214 | 1147 | 1232 |
| K08138 MFS transporter, SP family, xylose:H+ symporter                                                 | 766  | 889  | 1001 | 881  | 2773 | 2805 | 2782 | 2921 | 1965 | 1919 | 1840 | 1696 |
| K08151 MFS transporter, DHA1 family, tetracycline resistance protein                                   | 1810 | 1775 | 1744 | 1658 | 1063 | 1012 | 1009 | 1050 | 648  | 545  | 620  | 573  |
| K08153 MFS transporter, DHA1 family, multidrug resistance protein                                      | 444  | 410  | 402  | 387  | 91   | 89   | 65   | 63   | 256  | 304  | 229  | 266  |
| K08154 MFS transporter, DHA1 family, 2-module integral membrane pump EmrD                              | 805  | 812  | 785  | 777  | 553  | 607  | 602  | 521  | 1095 | 1081 | 1046 | 1096 |
| K08156 MFS transporter, DHA1 family, arabinose polymer utilization protein                             | 2020 | 2117 | 2115 | 2082 | 5723 | 5901 | 5862 | 5657 | 4823 | 4399 | 4809 | 4698 |
| K08159 MFS transporter, DHA1 family, L-arabinose/isopropyl-beta-D-thiogalactopyranoside export protein | 2370 | 2392 | 2283 | 2355 | 1492 | 1494 | 1296 | 1450 | 1560 | 1493 | 1387 | 1538 |
| K08160 MFS transporter, DHA1 family, multidrug/chloramphenicol efflux transport protein                | 622  | 621  | 594  | 718  | 480  | 499  | 495  | 477  | 932  | 926  | 976  | 919  |
| K08161 MFS transporter, DHA1 family, multidrug resistance protein                                      | 1496 | 1515 | 1426 | 1555 | 1056 | 1081 | 1085 | 1050 | 1979 | 2209 | 2010 | 2150 |
| K08162 MFS transporter, DHA1 family, multidrug resistance protein                                      | 710  | 730  | 675  | 713  | 497  | 494  | 499  | 473  | 990  | 979  | 1005 | 1069 |
| K08163 MFS transporter, DHA1 family, multidrug resistance protein                                      | 435  | 512  | 470  | 473  | 140  | 168  | 136  | 162  | 994  | 1105 | 1029 | 1075 |
| K08164 MFS transporter, DHA1 family, putative efflux transporter                                       | 1    | 0    | 0    | 0    | 0    | 0    | 0    | 0    | 0    | 0    | 0    | 0    |
| K08167 MFS transporter, DHA2 family, multidrug resistance protein                                      | 3046 | 2960 | 2684 | 2761 | 1607 | 1615 | 1478 | 1523 | 1715 | 1812 | 1695 | 1680 |
| K08168 MFS transporter, DHA2 family, metal-tetracycline-proton antiporter                              | 2    | 2    | 4    | 2    | 30   | 21   | 24   | 24   | 31   | 39   | 25   | 18   |
| K08169 MFS transporter, DHA2 family, multidrug resistance protein                                      | 2454 | 2420 | 2516 | 2664 | 3939 | 3998 | 4139 | 3952 | 4453 | 4349 | 4165 | 4232 |
| K08170 MFS transporter, DHA2 family, multidrug resistance protein                                      | 524  | 482  | 476  | 485  | 126  | 124  | 119  | 116  | 959  | 1017 | 1034 | 977  |
| K08172 MFS transporter, MHS family, shikimate and dehydroshikimate transport protein                   | 682  | 727  | 641  | 691  | 496  | 551  | 474  | 515  | 1064 | 1095 | 1129 | 1157 |
| K08173 MFS transporter, MHS family, metabolite:H+ symporter                                            | 281  | 225  | 245  | 260  | 349  | 406  | 361  | 339  | 58   | 73   | 78   | 70   |
| K08177 MFS transporter, OFA family, oxalate/formate antiporter                                         | 837  | 818  | 808  | 837  | 644  | 684  | 556  | 555  | 1122 | 1207 | 1074 | 1205 |
| K08178 MFS transporter, SHS family, lactate transporter                                                | 420  | 393  | 410  | 411  | 100  | 135  | 115  | 105  | 882  | 843  | 855  | 900  |
| K08191 MFS transporter, ACS family, hexuronate transporter                                             | 4812 | 4750 | 4790 | 4884 | 5614 | 5871 | 5823 | 5646 | 5393 | 5181 | 5238 | 5342 |
| K08194 MFS transporter, ACS family, D-galactonate transporter                                          | 4318 | 4192 | 3928 | 4193 | 2663 | 2682 | 2609 | 2775 | 3572 | 3683 | 3550 | 3564 |
| K08195 MFS transporter, AAHS family, 4-hydroxybenzoate transporter                                     | 5676 | 5946 | 5437 | 5874 | 3160 | 3015 | 3076 | 3209 | 3449 | 3327 | 3229 | 3577 |
| K08196 MFS transporter, AAHS family, cis,cis-muconate transporter                                      | 1895 | 1847 | 1806 | 1885 | 1084 | 1057 | 971  | 1074 | 682  | 555  | 535  | 610  |
| K08217 MFS transporter, DHA3 family, macrolide efflux protein                                          | 544  | 618  | 580  | 635  | 383  | 414  | 411  | 416  | 607  | 638  | 619  | 669  |
| K08219 MFS transporter, UMF2 family, putative MFS family transporter protein                           | 646  | 617  | 628  | 673  | 433  | 459  | 417  | 431  | 862  | 960  | 878  | 882  |
| K08221 MFS transporter, ACDE family, multidrug resistance protein                                      | 0    | 0    | 0    | 0    | 14   | 6    | 3    | 8    | 14   | 16   | 13   | 16   |
| K08222 MFS transporter, YQGE family, putative transporter                                              | 835  | 948  | 959  | 875  | 2049 | 1975 | 2264 | 2199 | 1833 | 1780 | 1897 | 1733 |
| K08223 MFS transporter, FSR family, fosmidomycin resistance protein                                    | 1553 | 1424 | 1517 | 1532 | 2943 | 2971 | 3050 | 2794 | 2851 | 2852 | 3026 | 2785 |
| K08224 MFS transporter, YNFM family, putative membrane transport protein                               | 2471 | 2357 | 2302 | 2268 | 1321 | 1349 | 1332 | 1426 | 1562 | 1522 | 1542 | 1520 |
| K08225 MFS transporter, ENT5 family, enterobactin (siderophore) exporter                               | 736  | 682  | 659  | 691  | 490  | 578  | 489  | 497  | 852  | 897  | 874  | 959  |
| K08227 MFS transporter, LPLT family, lysophospholipid transporter                                      | 783  | 727  | 670  | 736  | 467  | 522  | 469  | 444  | 1039 | 1058 | 899  | 1042 |
| K08344 suppressor for copper-sensitivity B                                                             | 719  | 703  | 660  | 725  | 200  | 209  | 205  | 200  | 1387 | 1391 | 1399 | 1476 |
| K08363 mercuric ion transport protein                                                                  | 707  | 685  | 727  | 671  | 543  | 539  | 518  | 531  | 176  | 158  | 179  | 171  |
| K08364 periplasmic mercuric ion binding protein                                                        | 658  | 709  | 699  | 685  | 1024 | 1006 | 941  | 931  | 594  | 542  | 591  | 484  |
| K08368 MFS transporter, putative metabolite:H+ symporter                                               | 2728 | 2606 | 2384 | 2582 | 1693 | 1739 | 1652 | 1684 | 876  | 841  | 756  | 890  |
| K08369 MFS transporter, putative metabolite:H+ symporter                                               | 2502 | 2455 | 2304 | 2381 | 1454 | 1571 | 1501 | 1554 | 3001 | 3285 | 3250 | 3410 |
| K08715 inward rectifier potassium channel                                                              | 1    | 0    | 0    | 0    | 0    | 0    | 0    | 0    | 0    | 0    | 0    | 0    |
| K08717 urea transporter                                                                                | 960  | 938  | 892  | 915  | 545  | 566  | 703  | 775  | 325  | 268  | 273  | 288  |
| K08721 outer membrane protein, multidrug efflux system                                                 | 2188 | 2349 | 2128 | 2155 | 1251 | 1200 | 1137 | 1227 | 709  | 657  | 680  | 745  |
| K08970 nickel/cobalt transporter (NiCo) family protein                                                 | 1990 | 2003 | 1784 | 2054 | 1725 | 1627 | 1665 | 1653 | 2097 | 2082 | 2084 | 2054 |
| K08978 bacterial/archaeal transporter family protein                                                   | 1151 | 1029 | 1120 | 1103 | 613  | 684  | 606  | 613  | 560  | 563  | 580  | 578  |
| K08994 ion channel-forming bestrophin family protein                                                   | 501  | 474  | 452  | 536  | 443  | 390  | 352  | 339  | 733  | 651  | 700  | 694  |
| K09013 Fe-S cluster assembly ATP-binding protein                                                       | 1350 | 1340 | 1424 | 1388 | 2165 | 2184 | 2178 | 2234 | 2334 | 2228 | 2247 | 2268 |
| K09016 putative pyrimidine permease RutG                                                               | 521  | 524  | 474  | 484  | 151  | 157  | 141  | 140  | 1082 | 1159 | 1097 | 1098 |
| K09771 small multidrug resistance family-3 protein                                                     | 736  | 649  | 695  | 657  | 425  | 380  | 363  | 398  | 399  | 464  | 439  | 501  |
| K09774 lipopolysaccharide export system protein LptA                                                   | 1153 | 1114 | 1195 | 1200 | 732  | 799  | 736  | 729  | 734  | 752  | 753  | 741  |
| K09800 translocation and assembly module TamB                                                          | 7231 | 7086 | 6797 | 7026 | 4087 | 4143 | 3906 | 4241 | 5067 | 5007 | 4828 | 5004 |
| K09820 manganese/iron transport system ATP-binding protein                                             | 2    | 2    | 2    | 3    | 2    | 2    | 0    | 4    | 3    | 4    | 2    | 1    |
| K10120 fructooligosaccharide transport system substrate-binding protein                                | 434  | 417  | 431  | 461  | 25   | 18   | 25   | 10   | 423  | 398  | 408  | 418  |
| K10121 fructooligosaccharide transport system permease protein                                         | 35   | 33   | 23   | 42   | 4    | 6    | 8    | 3    | 14   | 18   | 16   | 17   |
| K10122 fructooligosaccharide transport system permease protein                                         | 20   | 19   | 21   | 17   | 4    | 5    | 1    | 5    | 15   | 9    | 16   | 9    |
| K10124 carbohydrate-specific outer membrane porin                                                      | 1033 | 1038 | 1012 | 1033 | 796  | 877  | 770  | 800  | 1536 | 1629 | 1494 | 1580 |
| K10716 voltage-gated potassium channel                                                                 | 2068 | 2113 | 2008 | 2033 | 2630 | 2547 | 2537 | 2537 | 2502 | 2393 | 2517 | 2513 |
| K10820 galactofuranose transport system ATP-binding protein [EC:7.5.2.9]                               | 1190 | 1202 | 1120 | 1138 | 867  | 838  | 828  | 808  | 1484 | 1583 | 1334 | 1567 |
| K10974 cytosine permease                                                                               | 2611 | 2544 | 2304 | 2460 | 1504 | 1425 | 1407 | 1384 | 1740 | 1765 | 1615 | 1718 |
| K10975 allantoin permease                                                                              | 96   | 102  | 71   | 82   | 20   | 30   | 28   | 23   | 108  | 136  | 124  | 112  |
| K11005 hemolysin A                                                                                     | 0    | 1    | 12   | 9    | 3    | 5    | 2    | 2    | 123  | 128  | 138  | 146  |
| K11102 proton glutamate symport protein                                                                | 3256 | 3243 | 3174 | 3259 | 1928 | 1965 | 1833 | 1944 | 1870 | 1913 | 1796 | 1852 |
| K11104 melibiose permease                                                                              | 675  | 667  | 642  | 729  | 209  | 227  | 196  | 195  | 1299 | 1279 | 1275 | 1357 |
| K11105 cell volume regulation protein A                                                                | 4807 | 4894 | 4807 | 4941 | 4982 | 5047 | 4974 | 5104 | 4248 | 4185 | 4234 | 4255 |
| K11106 L-tartrate/succinate antiporter                                                                 | 798  | 782  | 741  | 754  | 566  | 600  | 508  | 486  | 1107 | 1199 | 1079 | 1092 |
| K11189 phosphocarrier protein                                                                          | 4139 | 4082 | 3843 | 3940 | 2073 | 2265 | 2245 | 2483 | 1867 | 1826 | 1730 | 1855 |
| K11201 PTS system, fructose-specific IIA-like component [EC:2.7.1.-]                                   | 0    | 0    | 0    | 0    | 8    | 10   | 1    | 5    | 0    | 2    | 6    | 2    |
| K11202 PTS system, fructose-specific IIB-like component [EC:2.7.1.-]                                   | 104  | 98   | 130  | 129  | 35   | 40   | 50   | 37   | 115  | 153  | 160  | 154  |
| K11203 PTS system, fructose-specific IIC-like component                                                | 437  | 427  | 418  | 414  | 120  | 146  | 100  | 100  | 372  | 398  | 326  | 372  |
| K11249 cysteine/O-acetylserine efflux protein                                                          | 316  | 371  | 348  | 362  | 267  | 311  | 255  | 244  | 451  | 502  | 498  | 485  |
| K11250 leucine efflux protein                                                                          | 1332 | 1308 | 1304 | 1362 | 924  | 928  | 861  | 931  | 695  | 726  | 717  | 689  |
| K11535 nucleoside transport protein                                                                    | 637  | 758  | 613  | 790  | 498  | 510  | 519  | 471  | 923  | 1043 | 967  | 1113 |
| K11537 MFS transporter, NHS family, xanthosine permease                                                | 734  | 697  | 889  | 794  | 2586 | 2546 | 2624 | 2477 | 1910 | 1885 | 1846 | 1833 |
| K11719 lipopolysaccharide export system protein LptC                                                   | 1199 | 1257 | 1220 | 1217 | 684  | 782  | 751  | 741  | 773  | 832  | 743  | 797  |
| K11732 phenylalanine-specific permease                                                                 | 822  | 820  | 685  | 911  | 607  | 703  | 631  | 576  | 1100 | 1085 | 1069 | 1265 |
| K11733 lysine-specific permease                                                                        | 3317 | 3324 | 3147 | 3271 | 1952 | 2005 | 1976 | 1934 | 1810 | 1895 | 1841 | 1898 |
| K11734 aromatic amino acid transport protein AroP                                                      | 4928 | 4803 | 4785 | 4885 | 2879 | 2979 | 2781 | 2893 | 3294 | 3275 | 3292 | 3163 |
| K11735 GABA permease                                                                                   | 2451 | 2330 | 2318 | 2325 | 1182 | 1130 | 1112 | 1188 | 1768 | 1658 | 1569 | 1686 |
| K11736 proline-specific permease ProP                                                                  | 726  | 752  | 738  | 778  | 543  | 581  | 556  | 564  | 1024 | 1015 | 1024 | 1054 |
| K11737 D-serine/D-alanine/glycine transporter                                                          | 812  | 843  | 839  | 833  | 662  | 626  | 582  | 598  | 1216 | 1215 | 1181 | 1258 |
| K11738 L-asparagine permease                                                                           | 764  | 763  | 821  | 732  | 544  | 552  | 565  | 527  | 933  | 1122 | 1054 | 1044 |
| K11741 quaternary ammonium compound-resistance protein SugE                                            | 1736 | 2873 | 2904 | 2805 | 2151 | 2151 | 1962 | 2153 | 1583 | 1496 | 1510 | 1516 |
| K11742 spermidine export protein MdtI                                                                  | 583  | 5    |      |      |      |      |      |      |      |      |      |      |

|                                                                                               |       |       |       |       |       |       |       |       |       |       |       |       |
|-----------------------------------------------------------------------------------------------|-------|-------|-------|-------|-------|-------|-------|-------|-------|-------|-------|-------|
| K12686 outer membrane lipase/esterase                                                         | 3023  | 3036  | 2692  | 2824  | 1583  | 1613  | 1628  | 1830  | 960   | 854   | 853   | 918   |
| K13283 ferrous-iron efflux pump FieF                                                          | 571   | 533   | 556   | 591   | 362   | 379   | 365   | 389   | 748   | 716   | 731   | 771   |
| K13629 D-serine transporter                                                                   | 849   | 836   | 843   | 911   | 613   | 673   | 618   | 571   | 1189  | 1184  | 1246  | 1257  |
| K13888 membrane fusion protein, macrolide-specific efflux system                              | 1819  | 1798  | 1699  | 1714  | 1124  | 1061  | 1021  | 1118  | 976   | 1055  | 922   | 960   |
| K13929 malonate decarboxylase alpha subunit [EC:2.3.1.187]                                    | 4267  | 4201  | 3664  | 3937  | 2221  | 2263  | 2049  | 2294  | 2142  | 2155  | 2003  | 2192  |
| K13931 malonate decarboxylase delta subunit                                                   | 710   | 752   | 639   | 624   | 395   | 382   | 353   | 369   | 389   | 373   | 371   | 359   |
| K13936 malonate transporter                                                                   | 481   | 525   | 456   | 540   | 389   | 415   | 397   | 405   | 665   | 655   | 594   | 648   |
| K14052 putrescine importer                                                                    | 2357  | 2203  | 2308  | 2165  | 1119  | 1108  | 941   | 1029  | 1503  | 1436  | 1446  | 1586  |
| K14053 outer membrane protein G                                                               | 3     | 2     | 6     | 8     | 8     | 12    | 4     | 10    | 48    | 54    | 44    | 33    |
| K14062 outer membrane protein N                                                               | 367   | 332   | 357   | 370   | 90    | 111   | 76    | 79    | 725   | 772   | 728   | 779   |
| K14347 solute carrier family 10 (sodium/bile acid cotransporter), member 7                    | 2024  | 1896  | 1808  | 1979  | 1126  | 1148  | 1127  | 1186  | 1285  | 1177  | 1238  | 1183  |
| K14392 sodium/pantothenate symporter                                                          | 1100  | 1092  | 1007  | 1050  | 753   | 824   | 770   | 630   | 1480  | 1581  | 1473  | 1478  |
| K14393 cation/acetate symporter                                                               | 5003  | 4954  | 5039  | 5245  | 2927  | 2925  | 2803  | 3006  | 2501  | 2619  | 2594  | 2736  |
| K14430 phosphate transporter                                                                  | 0     | 0     | 0     | 0     | 0     | 0     | 0     | 0     | 1     | 0     | 0     | 0     |
| K14445 solute carrier family 13 (sodium-dependent dicarboxylate transporter), member 2/3/5    | 1047  | 1003  | 1145  | 1080  | 3168  | 3097  | 3173  | 3183  | 2600  | 2458  | 2565  | 2654  |
| K14717 solute carrier family 39 (zinc transporter), member 11                                 | 13    | 7     | 11    | 6     | 8     | 14    | 9     | 12    | 12    | 8     | 7     | 9     |
| K15108 solute carrier family 25 (mitochondrial thiamine pyrophosphate transporter), member 19 | 0     | 0     | 0     | 0     | 0     | 0     | 0     | 0     | 1     | 0     | 0     | 0     |
| K15110 solute carrier family 25 (mitochondrial 2-oxodicarboxylate transporter), member 21     | 0     | 0     | 0     | 0     | 1     | 0     | 0     | 0     | 0     | 0     | 0     | 0     |
| K15268 O-acetylserine/cysteine efflux transporter                                             | 1970  | 1899  | 1784  | 1844  | 1094  | 1159  | 1026  | 1139  | 1144  | 1139  | 1145  | 1101  |
| K15269 probable blue pigment (indigoidine) exporter                                           | 338   | 371   | 350   | 373   | 77    | 92    | 91    | 65    | 639   | 748   | 750   | 750   |
| K15270 S-adenosylmethionine uptake transporter                                                | 3     | 4     | 3     | 3     | 3     | 4     | 8     | 3     | 11    | 6     | 3     | 8     |
| K15272 solute carrier family 35 (UDP-sugar transporter), member A1/2/3                        | 0     | 0     | 1     | 0     | 0     | 0     | 0     | 0     | 0     | 0     | 0     | 0     |
| K15280 solute carrier family 35, member C2                                                    | 1     | 0     | 0     | 0     | 0     | 0     | 0     | 0     | 0     | 0     | 0     | 0     |
| K15547 multidrug resistance protein MdtO                                                      | 1209  | 1181  | 1105  | 1197  | 803   | 791   | 725   | 748   | 1715  | 1738  | 1620  | 1700  |
| K15548 p-hydroxybenzoic acid efflux pump subunit AaeA                                         | 588   | 583   | 604   | 638   | 420   | 472   | 424   | 408   | 799   | 858   | 736   | 893   |
| K15549 membrane fusion protein, multidrug efflux system                                       | 603   | 579   | 582   | 574   | 438   | 392   | 416   | 359   | 829   | 853   | 891   | 970   |
| K15550 outer membrane protein, multidrug efflux system                                        | 845   | 824   | 754   | 723   | 483   | 506   | 463   | 470   | 1065  | 1080  | 1119  | 1095  |
| K15721 pestacin/yersiniaibactin receptor                                                      | 675   | 770   | 727   | 803   | 208   | 210   | 203   | 192   | 1625  | 1637  | 1605  | 1605  |
| K15725 outer membrane protein, cobalt-zinc-cadmium efflux system                              | 3821  | 3508  | 3564  | 3627  | 2026  | 2041  | 1891  | 1983  | 1160  | 1073  | 964   | 1092  |
| K15726 cobalt-zinc-cadmium resistance protein CzcA                                            | 10540 | 10333 | 10489 | 10435 | 12447 | 12757 | 12708 | 12826 | 8708  | 8118  | 8519  | 7979  |
| K15727 membrane fusion protein, cobalt-zinc-cadmium efflux system                             | 3308  | 3243  | 3487  | 3257  | 3506  | 3594  | 3318  | 3525  | 2360  | 2243  | 2316  | 2102  |
| K15738 ABC transport system ATP-binding/permease protein                                      | 4465  | 4334  | 4355  | 4388  | 5181  | 5133  | 5240  | 5111  | 5337  | 5521  | 5472  | 5435  |
| K15987 K(+)-stimulated pyrophosphate-energized sodium pump                                    | 2949  | 3148  | 3194  | 3059  | 5609  | 5644  | 5686  | 5608  | 4999  | 4979  | 5001  | 4975  |
| K16052 MscS family membrane protein                                                           | 41    | 39    | 44    | 41    | 30    | 23    | 27    | 19    | 133   | 142   | 124   | 155   |
| K16053 miniconductance mechanosensitive channel                                               | 3802  | 3897  | 3754  | 3889  | 4336  | 4531  | 4417  | 4567  | 4739  | 4543  | 4543  | 4538  |
| K16074 zinc transporter                                                                       | 3579  | 3712  | 3694  | 3537  | 1817  | 1849  | 1837  | 1964  | 2257  | 2114  | 2118  | 2162  |
| K16075 magnesium transporter                                                                  | 0     | 0     | 0     | 0     | 0     | 0     | 0     | 0     | 0     | 0     | 2     | 0     |
| K16076 outer membrane porin protein LC                                                        | 5     | 2     | 2     | 8     | 8     | 13    | 8     | 16    | 86    | 126   | 108   | 100   |
| K16077 sucrose porin                                                                          | 1426  | 1420  | 1377  | 1528  | 1026  | 984   | 959   | 967   | 1849  | 1936  | 1811  | 1921  |
| K16079 outer membrane immunogenic protein                                                     | 0     | 2     | 0     | 5     | 0     | 4     | 2     | 3     | 4     | 6     | 3     | 7     |
| K16081 alginate production protein                                                            | 2042  | 2184  | 1876  | 2048  | 1185  | 1066  | 1038  | 1187  | 642   | 636   | 518   | 663   |
| K16087 hemoglobin/transferrin/lactoferrin receptor protein                                    | 11754 | 11828 | 10885 | 11545 | 6456  | 6321  | 6136  | 6781  | 5365  | 5210  | 5219  | 5470  |
| K16088 outer-membrane receptor for ferric coprogen and ferric-rhodotorulic acid               | 11032 | 11074 | 10190 | 10380 | 6219  | 6107  | 5617  | 6412  | 3692  | 3173  | 3140  | 3454  |
| K16089 outer membrane receptor for ferrienterochelin and colicins                             | 9650  | 9626  | 9649  | 9262  | 18389 | 18612 | 18609 | 18428 | 13848 | 13639 | 13875 | 13395 |
| K16090 catecholate siderophore receptor                                                       | 7795  | 7608  | 7613  | 7529  | 4198  | 3861  | 3736  | 3973  | 3959  | 3960  | 3790  | 3974  |
| K16091 Fe(3+)-dicltrate transport protein                                                     | 4296  | 4454  | 4305  | 4162  | 2450  | 2335  | 2314  | 2538  | 1569  | 1572  | 1447  | 1505  |
| K16092 vitamin B12 transporter                                                                | 3982  | 3985  | 3489  | 3573  | 2120  | 2109  | 2119  | 2368  | 2572  | 2604  | 2510  | 2561  |
| K16139 glucuronide carrier protein                                                            | 12    | 5     | 3     | 6     | 8     | 14    | 8     | 9     | 48    | 28    | 45    | 31    |
| K16140 putative glucuronide porin                                                             | 2     | 1     | 3     | 1     | 28    | 16    | 19    | 10    | 70    | 59    | 61    | 61    |
| K16152 heme acquisition protein HasR                                                          | 4277  | 4068  | 3673  | 3748  | 2095  | 2051  | 1948  | 2268  | 1231  | 1105  | 1182  | 1218  |
| K16169 xanthine permease                                                                      | 104   | 88    | 94    | 89    | 23    | 34    | 29    | 16    | 105   | 90    | 94    | 106   |
| K16209 lactose/raffinose/galactose permease                                                   | 30    | 31    | 37    | 27    | 32    | 36    | 25    | 27    | 90    | 89    | 77    | 103   |
| K16210 oligogalacturonide transporter                                                         | 2025  | 1971  | 1977  | 2177  | 1797  | 1802  | 1558  | 1764  | 2202  | 2400  | 2296  | 2392  |
| K16211 maltose/moltooligosaccharide transporter                                               | 154   | 201   | 199   | 193   | 267   | 276   | 245   | 280   | 20    | 44    | 34    | 33    |
| K16234 histidine transporter                                                                  | 2961  | 2887  | 2786  | 3074  | 1468  | 1397  | 1407  | 1581  | 1741  | 1851  | 1706  | 1702  |
| K16235 S-methylmethionine transporter                                                         | 554   | 523   | 518   | 590   | 146   | 175   | 170   | 133   | 1091  | 1137  | 1082  | 1159  |
| K16238 ethanolamine permease                                                                  | 2211  | 2222  | 2167  | 2177  | 1272  | 1349  | 1308  | 1319  | 1561  | 1571  | 1406  | 1577  |
| K16248 probable glucitol transport protein GutA                                               | 139   | 129   | 111   | 126   | 189   | 165   | 164   | 155   | 460   | 495   | 454   | 437   |
| K16261 yeast amino acid transporter                                                           | 0     | 2     | 0     | 0     | 2     | 0     | 0     | 0     | 0     | 0     | 0     | 0     |
| K16263 amino acid efflux transporter                                                          | 781   | 746   | 740   | 817   | 535   | 603   | 491   | 572   | 987   | 1030  | 974   | 976   |
| K16264 cobalt-zinc-cadmium efflux system protein                                              | 2777  | 2676  | 2739  | 2675  | 3202  | 3400  | 3319  | 3370  | 2347  | 2211  | 2272  | 2250  |
| K16300 membrane fusion protein, epimerase transport system                                    | 5     | 2     | 0     | 3     | 0     | 0     | 0     | 0     | 0     | 0     | 0     | 0     |
| K16301 deferrochelataase/peroxidase EfeB [EC:1.11.1.-]                                        | 753   | 689   | 732   | 740   | 509   | 564   | 549   | 529   | 983   | 1098  | 1025  | 1033  |
| K16321 high-affinity gluconate transporter                                                    | 2     | 0     | 1     | 1     | 8     | 21    | 8     | 13    | 11    | 16    | 3     | 7     |
| K16322 low-affinity inorganic phosphate transporter                                           | 2740  | 2628  | 2554  | 2665  | 1778  | 1712  | 1721  | 1689  | 2081  | 2077  | 1966  | 2023  |
| K16323 purine nucleoside transport protein                                                    | 0     | 0     | 3     | 0     | 0     | 0     | 0     | 0     | 0     | 0     | 0     | 0     |
| K16324 putative pseudouridine transporter                                                     | 365   | 343   | 362   | 381   | 530   | 665   | 602   | 675   | 62    | 84    | 79    | 71    |
| K16325 nucleoside permease                                                                    | 81    | 110   | 72    | 76    | 115   | 126   | 98    | 94    | 62    | 58    | 77    | 68    |
| K16331 sulfate permease                                                                       | 3     | 0     | 0     | 0     | 0     | 0     | 0     | 0     | 0     | 0     | 0     | 0     |
| K16345 xanthine permease XanP                                                                 | 7074  | 7194  | 6663  | 6988  | 6412  | 6577  | 6115  | 6552  | 5634  | 5409  | 5464  | 5535  |
| K16346 xanthine permease XanQ                                                                 | 3     | 9     | 1     | 6     | 9     | 27    | 24    | 19    | 93    | 89    | 80    | 87    |
| K16347 entericidin A                                                                          | 76    | 84    | 75    | 83    | 68    | 67    | 55    | 48    | 132   | 119   | 131   | 107   |
| K16348 entericidin B                                                                          | 121   | 95    | 103   | 127   | 71    | 69    | 73    | 62    | 150   | 177   | 157   | 156   |
| K16693 enterobacterial common antigen flippase                                                | 772   | 783   | 755   | 716   | 510   | 580   | 507   | 539   | 1031  | 1175  | 1156  | 1214  |
| K16695 lipopolysaccharide exporter                                                            | 261   | 287   | 239   | 274   | 454   | 431   | 432   | 372   | 67    | 54    | 61    | 52    |
| K16788 niacin transporter                                                                     | 62    | 40    | 34    | 45    | 11    | 11    | 12    | 77    | 62    | 40    | 49    | 49    |
| K16789 thiamine transporter                                                                   | 297   | 319   | 337   | 349   | 130   | 145   | 118   | 111   | 257   | 311   | 257   | 294   |
| K16923 energy-coupling factor transport system substrate-specific component                   | 268   | 293   | 325   | 314   | 89    | 77    | 113   | 91    | 253   | 304   | 242   | 273   |
| K16924 energy-coupling factor transport system substrate-specific component                   | 233   | 288   | 224   | 243   | 46    | 41    | 55    | 43    | 262   | 274   | 245   | 258   |
| K16925 energy-coupling factor transport system substrate-specific component                   | 45    | 39    | 50    | 44    | 4     | 10    | 8     | 7     | 30    | 72    | 45    | 24    |
| K16926 energy-coupling factor transport system substrate-specific component                   | 160   | 164   | 178   | 185   | 138   | 135   | 100   | 135   | 524   | 506   | 497   | 528   |
| K16927 energy-coupling factor transport system substrate-specific component                   | 52    | 53    | 65    | 69    | 50    | 36    | 58    | 60    | 169   | 150   | 156   | 125   |
| K16928 energy-coupling factor transport system substrate-specific component                   | 0     | 0     | 0     | 0     | 0     | 0     | 0     | 1     | 0     | 1     | 1     | 0     |
| K16929 energy-coupling factor transport system substrate-specific component                   | 0     | 0     | 0     | 0     | 0     | 1     | 2     | 1     | 1     | 0     | 2     | 1     |
| K17713 outer membrane protein assembly factor BamB                                            | 2467  | 2626  | 2483  | 2550  | 1556  | 1606  | 1471  | 1444  | 1601  | 1665  | 1475  | 1637  |
| K17938 peptide/bleomycin uptake transporter                                                   | 703   | 706   | 671   | 704   | 548   | 559   | 525   | 521   | 922   | 1119  | 991   | 1038  |
| K18141 membrane fusion protein, multidrug efflux system                                       | 470   | 504   | 400   | 507   | 163   | 130   | 172   | 136   | 976   | 966   | 938   | 990   |
| K18142 multidrug efflux pump                                                                  | 1346  | 1276  | 1220  | 1315  | 443   | 455   | 439   | 424   | 2742  | 2595  | 2697  | 2740  |
| K18214 MFS transporter, DHA3 family, tetracycline resistance protein                          | 17    | 19    | 23    | 11    | 6     | 6     | 5     | 20    | 20    | 14    | 13    | 31    |
| K18218 tetracycline resistance efflux pump                                                    | 1     | 2     | 1     | 1     | 4     | 7     | 3     | 3     | 0     | 1     | 2     | 1     |
| K18295 membrane fusion protein, multidrug efflux system                                       | 1844  | 1843  | 1576  | 1675  | 978   | 994   | 798   | 905   | 603   | 550   | 477   | 581   |
| K18296 multidrug efflux pump                                                                  | 5157  | 5119  | 4830  | 4644  | 2762  | 2580  | 2597  | 2930  | 1517  | 1564  | 1515  | 1626  |
| K18298 membrane fusion protein, multidrug efflux system                                       | 1727  | 1726  | 1573  | 1633  | 914   | 911   | 862   | 892   | 501   | 442   | 436   | 505   |
| K18299 multidrug efflux pump                                                                  | 3503  | 3461  | 3456  | 3280  | 1730  | 1782  | 1641  | 1913  | 1095  | 989   | 934   | 984   |
| K18300 outer membrane protein, multidrug efflux system                                        | 708   | 678   | 673   | 677   | 347   | 345   | 366   | 339   | 202   | 200   | 175   | 222   |
| K18302 membrane fusion protein, multidrug efflux system                                       | 1510  | 1522  | 1426  | 1530  | 834   | 803   | 722   | 928   | 562   | 503   | 514   | 547   |
| K18303 multidrug efflux pump                                                                  | 4838  | 4849  | 4860  | 4685  | 2706  | 2615  | 2506  | 2689  | 1626  | 1543  | 1534  | 1619  |
| K18305 transmembrane protein                                                                  | 796   | 831   | 738   | 792   | 438   | 428   | 369   | 480   | 226   | 240   | 224   | 227   |
| K18308 outer membrane protein, multidrug efflux system                                        | 2500  | 2302  | 1989  | 2175  | 1150  | 1119  | 1062  | 1269  | 758   | 616   | 607   | 627   |
| K18480 cholesterol transport system auxiliary component                                       | 1666  | 1617  | 1651  | 1627  | 864   | 849   | 828   | 968   | 464   | 459   | 480   | 459   |
| K18552 MFS transporter, DHA1 family, chloramphenicol/florfenicol resistance protein           | 2     | 3     | 0     | 0     | 0     | 4     | 0     | 0     | 4     | 4     | 1     | 3     |
| K18567 MFS transporter, DHA1 family, purine base/nucleoside efflux pump                       | 2720  | 2793  | 2529  | 2663  | 1706  | 1555  | 1700  | 1797  | 786   | 781   | 720   | 775   |
| K18814 putative inorganic carbon (hco3(-)) transporter                                        | 73    | 58    | 50    | 61    | 24    | 16    | 25    | 26    | 64    | 104   | 82    | 82    |
| K18898 membrane fusion protein, multidrug efflux system                                       | 3     | 4     | 3     | 3     | 9     | 9     | 25    | 10    | 61    | 97    | 99    | 76    |
| K18899 multidrug efflux pump                                                                  | 13    | 16    | 5     |       |       |       |       |       |       |       |       |       |

[illegible]

|                                                                                    |        |        |        |        |        |        |        |        |        |        |        |        |
|------------------------------------------------------------------------------------|--------|--------|--------|--------|--------|--------|--------|--------|--------|--------|--------|--------|
| K12061 conjugal transfer pilus assembly protein TraW                               | 344    | 329    | 387    | 379    | 139    | 169    | 151    | 110    | 2208   | 2538   | 2168   | 2183   |
| K12062 conjugal transfer pilin signal peptidase TrbI                               | 230    | 192    | 231    | 229    | 82     | 76     | 81     | 83     | 1263   | 1423   | 1173   | 1319   |
| K12063 conjugal transfer ATP-binding protein TraC                                  | 1448   | 1289   | 1445   | 1470   | 629    | 563    | 541    | 526    | 8524   | 9390   | 8573   | 9016   |
| K12064 conjugal transfer pilus assembly protein TraV                               | 80     | 89     | 111    | 106    | 50     | 44     | 37     | 30     | 479    | 547    | 529    | 584    |
| K12065 conjugal transfer pilus assembly protein TraB                               | 658    | 631    | 660    | 682    | 232    | 297    | 252    | 235    | 4093   | 4190   | 3884   | 4169   |
| K12066 conjugal transfer pilus assembly protein TraK                               | 245    | 267    | 269    | 289    | 98     | 120    | 110    | 114    | 1486   | 1606   | 1461   | 1680   |
| K12067 conjugal transfer pilus assembly protein TraE                               | 347    | 302    | 294    | 294    | 108    | 144    | 100    | 115    | 1776   | 1856   | 1764   | 1735   |
| K12068 conjugal transfer pilus assembly protein TraL                               | 187    | 153    | 161    | 169    | 50     | 62     | 72     | 64     | 862    | 985    | 961    | 957    |
| K12069 conjugal transfer pilus assembly protein TraA                               | 2      | 1      | 2      | 3      | 0      | 0      | 0      | 0      | 0      | 0      | 1      | 0      |
| K12070 conjugal transfer pilus assembly protein TraI                               | 0      | 2      | 0      | 0      | 0      | 0      | 0      | 0      | 0      | 0      | 2      | 1      |
| K12071 conjugal transfer pilus assembly protein TraD                               | 31     | 30     | 12     | 21     | 42     | 54     | 54     | 54     | 48     | 37     | 44     | 38     |
| K12072 conjugative transfer pilus assembly protein TraH                            | 829    | 766    | 803    | 838    | 369    | 393    | 383    | 365    | 4616   | 4805   | 4626   | 4823   |
| K12203 defect in organelle trafficking protein DotB [EC:7.2.4.8]                   | 0      | 1      | 0      | 1      | 0      | 0      | 0      | 0      | 2      | 0      | 1      | 1      |
| K12204 defect in organelle trafficking protein DotC                                | 0      | 0      | 0      | 0      | 0      | 0      | 0      | 0      | 1      | 0      | 0      | 1      |
| K12209 intracellular multiplication protein lcmE                                   | 0      | 0      | 0      | 0      | 0      | 1      | 0      | 0      | 0      | 0      | 0      | 0      |
| K12213 intracellular multiplication protein lcmK                                   | 0      | 0      | 0      | 0      | 0      | 2      | 0      | 0      | 0      | 0      | 0      | 0      |
| K12217 intracellular multiplication protein lcmO [EC:7.2.4.8]                      | 4      | 3      | 9      | 4      | 3      | 1      | 2      | 2      | 17     | 10     | 10     | 28     |
| K12218 intracellular multiplication protein lcmP                                   | 0      | 0      | 0      | 0      | 0      | 0      | 0      | 0      | 0      | 1      | 0      | 0      |
| K12268 accessory secretory protein Asp1                                            | 0      | 0      | 1      | 0      | 0      | 2      | 0      | 0      | 0      | 0      | 1      | 0      |
| K12269 accessory secretory protein Asp2                                            | 0      | 1      | 0      | 1      | 3      | 2      | 4      | 1      | 2      | 0      | 1      | 0      |
| K12270 accessory secretory protein Asp3                                            | 0      | 0      | 0      | 0      | 0      | 0      | 0      | 1      | 0      | 0      | 1      | 0      |
| K12278 MSHA biogenesis protein MshG                                                | 0      | 1      | 0      | 1      | 0      | 0      | 0      | 0      | 0      | 2      | 0      | 1      |
| K12288 pilus assembly protein HofM                                                 | 482    | 560    | 490    | 540    | 379    | 387    | 387    | 409    | 700    | 770    | 626    | 692    |
| K12289 pilus assembly protein HofN                                                 | 399    | 326    | 339    | 363    | 290    | 297    | 236    | 237    | 465    | 460    | 458    | 485    |
| K12290 pilus assembly protein HofO                                                 | 267    | 252    | 213    | 263    | 141    | 200    | 188    | 179    | 318    | 326    | 309    | 385    |
| K12291 pilus assembly protein HofP                                                 | 183    | 234    | 186    | 217    | 131    | 146    | 138    | 169    | 332    | 326    | 292    | 291    |
| K12510 tight adherence protein B                                                   | 1546   | 1547   | 1517   | 1612   | 747    | 739    | 741    | 763    | 702    | 601    | 717    | 752    |
| K12511 tight adherence protein C                                                   | 1387   | 1424   | 1258   | 1294   | 750    | 740    | 741    | 842    | 481    | 401    | 449    | 408    |
| K12517 major pilin subunit PapA                                                    | 0      | 1      | 0      | 1      | 2      | 0      | 0      | 3      | 0      | 4      | 1      | 1      |
| K12518 outer membrane usher protein PapC                                           | 7      | 8      | 9      | 11     | 41     | 43     | 40     | 44     | 127    | 120    | 115    | 170    |
| K12519 chaperone protein PapD                                                      | 2      | 4      | 6      | 4      | 13     | 10     | 11     | 6      | 39     | 35     | 40     | 44     |
| K12520 minor pilin subunit PapE                                                    | 0      | 0      | 0      | 0      | 0      | 0      | 0      | 0      | 1      | 2      | 1      | 0      |
| K12521 minor pilin subunit PapF                                                    | 0      | 0      | 0      | 1      | 1      | 0      | 0      | 0      | 1      | 0      | 0      | 0      |
| K12522 adhesin PapG                                                                | 0      | 0      | 2      | 1      | 1      | 1      | 1      | 0      | 4      | 3      | 2      | 0      |
| K12523 minor pilin subunit PapK                                                    | 2      | 0      | 0      | 0      | 1      | 0      | 3      | 0      | 2      | 0      | 1      | 1      |
| K121964 Mat/Ecp fimbriae major subunit                                             | 307    | 285    | 281    | 296    | 74     | 55     | 81     | 67     | 482    | 459    | 475    | 488    |
| K121965 Mat/Ecp fimbriae periplasmic chaperone                                     | 282    | 290    | 274    | 322    | 79     | 79     | 77     | 76     | 530    | 493    | 552    | 604    |
| K121966 Mat/Ecp fimbriae outer membrane usher protein                              | 1241   | 1337   | 1164   | 1303   | 288    | 292    | 308    | 273    | 2025   | 2231   | 2137   | 2207   |
| K121967 Mat/Ecp fimbriae adhesin                                                   | 818    | 797    | 726    | 816    | 180    | 216    | 184    | 210    | 1462   | 1379   | 1346   | 1484   |
| K121968 Mat/Ecp fimbriae periplasmic chaperone                                     | 356    | 362    | 305    | 389    | 78     | 93     | 98     | 97     | 596    | 584    | 540    | 614    |
| K22487 type III secretion system protein                                           | 0      | 3      | 2      | 0      | 3      | 0      | 0      | 0      | 0      | 0      | 2      | 0      |
| K22488 type III secretion system protein                                           | 0      | 0      | 0      | 0      | 16     | 17     | 1      | 9      | 5      | 0      | 2      | 0      |
| K22504 type III secretion system outer membrane ring protein                       | 0      | 0      | 0      | 0      | 0      | 0      | 0      | 0      | 0      | 0      | 2      | 0      |
| K22505 type III secretion system inner membrane ring protein                       | 0      | 0      | 0      | 0      | 3      | 0      | 2      | 4      | 0      | 0      | 0      | 1      |
| K22506 type III secretion system ATPase [EC:7.4.2.8]                               | 0      | 0      | 1      | 0      | 0      | 0      | 0      | 0      | 0      | 0      | 0      | 0      |
| K22507 type III secretion system export apparatus protein                          | 1      | 0      | 0      | 0      | 5      | 6      | 0      | 8      | 0      | 0      | 0      | 0      |
| K22508 type III secretion system export apparatus protein                          | 0      | 0      | 0      | 0      | 0      | 3      | 5      | 4      | 0      | 2      | 1      | 0      |
| K22509 type III secretion system export apparatus protein                          | 0      | 0      | 0      | 0      | 7      | 5      | 3      | 9      | 0      | 0      | 2      | 1      |
| K22510 type III secretion system export apparatus switch protein                   | 0      | 0      | 0      | 0      | 2      | 6      | 7      | 3      | 1      | 0      | 0      | 2      |
| K22514 type III secretion system protein                                           | 0      | 0      | 0      | 0      | 1      | 0      | 0      | 0      | 0      | 0      | 1      | 0      |
| ko02042 Bacterial toxins                                                           | 23408  | 23457  | 23290  | 23428  | 22752  | 22816  | 23118  | 23209  | 16945  | 16365  | 16465  | 16328  |
| K03699 putative hemolysin                                                          | 1844   | 1908   | 1958   | 1829   | 2836   | 2775   | 2919   | 2865   | 2850   | 2870   | 2960   | 2878   |
| K11008 cytotoxic necrotizing factor 1                                              | 8      | 2      | 5      | 7      | 11     | 3      | 7      | 18     | 142    | 200    | 165    | 172    |
| K11009 murine toxin                                                                | 68     | 62     | 60     | 68     | 84     | 115    | 110    | 106    | 0      | 0      | 0      | 0      |
| K11020 exotoxin A [EC:2.4.2.-]                                                     | 449    | 411    | 367    | 392    | 219    | 191    | 215    | 234    | 125    | 143    | 117    | 120    |
| K11021 insecticidal toxin complex protein TccC                                     | 0      | 0      | 0      | 1      | 0      | 0      | 0      | 0      | 0      | 0      | 0      | 1      |
| K11045 cAMP factor                                                                 | 0      | 1      | 0      | 0      | 1      | 0      | 0      | 0      | 0      | 0      | 0      | 0      |
| K11068 hemolysin III                                                               | 1605   | 1595   | 1702   | 1604   | 2012   | 2058   | 2089   | 1950   | 2044   | 1928   | 2080   | 1953   |
| K11139 hemolysin E                                                                 | 3      | 0      | 0      | 3      | 14     | 6      | 3      | 6      | 12     | 15     | 16     | 17     |
| K16636 exoenzyme T                                                                 | 1645   | 1636   | 1654   | 1585   | 931    | 971    | 883    | 906    | 611    | 563    | 504    | 547    |
| K16637 adenylate cyclase ExoY                                                      | 883    | 822    | 758    | 784    | 407    | 406    | 379    | 433    | 219    | 241    | 210    | 228    |
| K16638 exoenzyme U                                                                 | 2600   | 2537   | 2781   | 2767   | 1489   | 1465   | 1541   | 1463   | 894    | 846    | 823    | 783    |
| ko02022 Two-component system                                                       | 238634 | 234562 | 229833 | 235177 | 148390 | 149747 | 146323 | 150491 | 171306 | 173655 | 169638 | 173985 |
| K02477 two-component system, CtrB family, response regulator                       | 28     | 28     | 22     | 31     | 3      | 5      | 7      | 8      | 39     | 32     | 22     | 28     |
| K02479 two-component system, LytR family, response regulator                       | 1946   | 1959   | 2124   | 2112   | 3918   | 3979   | 3964   | 3940   | 4079   | 3921   | 4098   | 3833   |
| K02479 two-component system, NarX family, response regulator                       | 1      | 0      | 1      | 0      | 0      | 0      | 0      | 0      | 0      | 0      | 0      | 0      |
| K02481 two-component system, NtrC family, response regulator                       | 1696   | 1764   | 1813   | 1731   | 5340   | 5384   | 5591   | 5339   | 3940   | 3617   | 3923   | 3697   |
| K02483 two-component system, OmpR family, response regulator                       | 417    | 424    | 431    | 435    | 212    | 230    | 235    | 227    | 964    | 1038   | 908    | 931    |
| K02485 two-component system, response regulator                                    | 526    | 519    | 580    | 550    | 424    | 451    | 380    | 410    | 772    | 860    | 767    | 832    |
| K07183 two-component system, response regulator / RNA-binding antiterminator       | 567    | 590    | 501    | 586    | 306    | 305    | 294    | 262    | 190    | 167    | 156    | 135    |
| K07814 putative two-component system response regulator                            | 2584   | 2576   | 2470   | 2532   | 1460   | 1332   | 1260   | 1385   | 1243   | 1283   | 1250   | 1303   |
| K21603 two-component system, OmpR family, flagellar system response regulator FtcR | 0      | 2      | 1      | 0      | 0      | 0      | 0      | 3      | 0      | 0      | 3      | 0      |
| K22010 two-component system, response regulator PtdaR                              | 375    | 311    | 358    | 338    | 87     | 118    | 88     | 85     | 281    | 334    | 316    | 332    |
| K22067 two-component system, oxyanion-binding sensor                               | 1789   | 1729   | 1805   | 1741   | 921    | 952    | 885    | 1069   | 575    | 459    | 509    | 470    |
| ko02035 Bacterial motility proteins                                                | 232520 | 230031 | 224589 | 229169 | 138908 | 141101 | 132665 | 138650 | 104936 | 105096 | 102415 | 105206 |
| K02385 flagellar protein FliD                                                      | 115    | 100    | 128    | 101    | 29     | 24     | 31     | 26     | 76     | 84     | 77     | 90     |
| K02395 flagellar protein FliJ                                                      | 2085   | 2045   | 2044   | 2046   | 1262   | 1285   | 1280   | 1276   | 695    | 616    | 636    | 608    |
| K02404 flagellar biosynthesis protein FliH                                         | 1539   | 1606   | 1463   | 1459   | 811    | 808    | 687    | 809    | 511    | 418    | 442    | 452    |
| K02415 flagellar FliL protein                                                      | 995    | 949    | 995    | 905    | 620    | 617    | 769    | 754    | 295    | 333    | 323    | 332    |
| K02675 type IV pilus assembly protein PilY2                                        | 429    | 515    | 555    | 548    | 311    | 306    | 293    | 286    | 157    | 171    | 165    | 173    |
| K03516 flagellar protein FliE                                                      | 81     | 81     | 74     | 93     | 145    | 105    | 113    | 121    | 20     | 22     | 25     | 17     |
| K04562 flagellar biosynthesis protein FliG                                         | 1170   | 1152   | 1156   | 1169   | 628    | 668    | 604    | 655    | 386    | 325    | 364    | 406    |
| K06595 heam-based aerotactic transducer                                            | 2      | 0      | 6      | 3      | 0      | 0      | 0      | 0      | 0      | 1      | 0      | 0      |
| K06601 flagellar protein FliB                                                      | 0      | 0      | 1      | 0      | 0      | 0      | 0      | 0      | 0      | 0      | 2      | 1      |
| K06602 flagellar protein FliA                                                      | 0      | 0      | 0      | 1      | 0      | 0      | 0      | 0      | 0      | 0      | 0      | 0      |
| K06603 flagellar protein FliG                                                      | 524    | 565    | 530    | 558    | 286    | 299    | 316    | 312    | 176    | 154    | 179    | 165    |
| K07351 fimbrial protein                                                            | 242    | 236    | 240    | 264    | 103    | 91     | 98     | 50     | 549    | 588    | 532    | 606    |
| K07352 type I fimbrial protein                                                     | 0      | 4      | 7      | 0      | 2      | 0      | 0      | 0      | 0      | 0      | 3      | 0      |
| K07353 fimbrial chaperone protein                                                  | 0      | 0      | 0      | 0      | 9      | 4      | 8      | 7      | 0      | 0      | 3      | 1      |
| K07354 outer membrane usher protein                                                | 0      | 0      | 0      | 0      | 16     | 11     | 21     | 16     | 0      | 12     | 6      | 5      |
| K07355 fimbrial-like protein                                                       | 0      | 0      | 0      | 0      | 5      | 8      | 1      | 2      | 0      | 0      | 3      | 2      |
| K07356 fimbrial protein                                                            | 0      | 0      | 0      | 0      | 14     | 16     | 8      | 5      | 24     | 15     | 14     | 7      |
| K10564 chemotaxis protein MotC                                                     | 1      | 2      | 0      | 1      | 3      | 0      | 0      | 0      | 5      | 0      | 3      | 5      |
| K10565 chemotaxis protein MotD                                                     | 0      | 1      | 0      | 0      | 3      | 0      | 4      | 0      | 0      | 6      | 1      | 5      |
| K13626 flagellar assembly factor FliW                                              | 288    | 251    | 253    | 279    | 68     | 75     | 94     | 89     | 271    | 317    | 280    | 288    |
| K18475 lysine-N-methylase [EC:2.1.1.-]                                             | 169    | 167    | 198    | 191    | 76     | 89     | 104    | 88     | 193    | 234    | 219    | 223    |
| ko04812 Cytoskeleton proteins                                                      | 42353  | 42608  | 42643  | 42945  | 43096  | 42923  | 42838  | 42182  | 48325  | 49299  | 48277  | 48294  |
| K06990 MEMO1 family protein                                                        | 7      | 3      | 4      | 7      | 0      | 2      | 3      | 0      | 28     | 24     | 16     | 21     |
| K10401 kinesin family member 18/19                                                 | 0      | 0      | 0      | 0      | 2      | 0      | 0      | 0      | 0      | 0      | 0      | 1      |
| K17292 tubulin-specific chaperone A                                                | 0      | 0      | 0      | 0      | 0      | 0      | 0      | 0      | 1      | 0      | 0      | 0      |
| K18640 plasmid segregation protein ParM                                            | 1591   | 1612   | 1576   | 1704   | 900    | 971    | 832    | 877    | 4905   | 5481   | 5150   | 5121   |
| K19755 radial spoke head protein 1                                                 | 20     | 23     | 43     | 31     | 100    | 99     | 0      | 0      | 73     | 54     | 88     | 68     |
| ko04147 Exosome                                                                    | 228110 | 227877 | 228494 | 227107 | 244287 | 245322 | 242597 | 244941 | 227812 | 225518 | 225574 | 224253 |
| K01482 dimethylargininase [EC:3.5.3.18]                                            | 72     | 69     | 75     | 84     | 44     | 33     | 47     | 41     | 39     | 34     | 25     | 39     |
| K02503 histidine triad (HIT) family protein                                        | 2078   | 2105   | 2006   | 2175   | 1888   | 1911   | 1912   | 1875   | 1717   | 1648   | 1665   | 1624   |
| K03098 apolipoprotein D and lipocalin family protein                               | 1350   | 1343   | 1257   | 1291   | 739    | 686    | 719    | 714    | 880    | 819    | 889    | 861    |
| K03522 electron transfer flavoprotein alpha subunit                                | 3999   | 4137   | 3983   | 3921   | 4340   | 4137   | 4150   | 4411   | 3167   | 2835   | 3044   | 3117   |
| K17086 transmembrane 9 superfamily member 2/4                                      | 0      | 0      | 0      | 0      | 0      | 0      | 0      | 0      | 0      | 0      | 0      | 1      |
| K17255 Rab GDP dissociation inhibitor                                              | 0      | 1      | 0      | 0      | 0      | 0      | 0      | 0      | 0      | 0      | 0      | 0      |
| K18222 arylsulfatase E [EC:3.1.6.-]                                                | 0      | 0      | 0      | 0      | 0      | 0      | 0      | 0      | 0      | 0      | 0      | 1      |
| K18258 thiomorpholine-carboxylate dehydrogenase [EC:1.5.1.25]                      | 1      | 0      | 0      | 1      | 0      | 1      | 0      | 2      | 0      | 0      | 1      | 1      |
| K20011 peroxiredoxin 3 [EC:1.11.1.15]                                              | 1      | 0      | 0      | 0      | 0      | 0      | 0      | 0      | 0      | 0      | 0      | 0      |
| ko02048 Prokaryotic defense system                                                 | 80503  | 80809  | 82773  | 82175  | 83336  | 84742  | 84850  | 83760  | 85210  | 87396  | 85610  | 86848  |
| K00071 site                                                                        |        |        |        |        |        |        |        |        |        |        |        |        |

|                                                                                |        |        |        |        |        |        |        |        |       |       |       |       |
|--------------------------------------------------------------------------------|--------|--------|--------|--------|--------|--------|--------|--------|-------|-------|-------|-------|
| K06218 mRNA interferase RelE/StbE                                              | 131    | 143    | 134    | 106    | 78     | 104    | 65     | 90     | 24    | 25    | 33    | 38    |
| K07012 CRISPR-associated endonuclease/helicase Cas3 [EC:3.1.-.- 3.6.4.-]       | 3000   | 3144   | 3248   | 3259   | 1391   | 1428   | 1465   | 1285   | 3308  | 3491  | 3414  | 3467  |
| K07016 CRISPR-associated protein Csm1                                          | 0      | 0      | 1      | 1      | 2      | 0      | 1      | 4      | 6     | 7     | 8     | 5     |
| K07060 endoribonuclease Nob1 [EC:3.1.-.-]                                      | 0      | 0      | 2      | 3      | 0      | 0      | 0      | 0      | 2     | 4     | 2     | 0     |
| K07062 toxin FIB [EC:3.1.-.-]                                                  | 13     | 18     | 23     | 15     | 21     | 16     | 16     | 31     | 20    | 36    | 21    | 28    |
| K07171 mRNA interferase MazF [EC:3.1.-.-]                                      | 665    | 570    | 576    | 614    | 303    | 261    | 225    | 254    | 608   | 801   | 666   | 700   |
| K07172 antitoxin MazE                                                          | 2      | 1      | 1      | 0      | 8      | 10     | 9      | 6      | 10    | 8     | 19    | 17    |
| K07316 adenine-specific DNA-methyltransferase [EC:2.1.1.72]                    | 85     | 68     | 86     | 81     | 53     | 60     | 50     | 35     | 218   | 300   | 237   | 218   |
| K07317 adenine-specific DNA-methyltransferase [EC:2.1.1.72]                    | 5      | 3      | 4      | 6      | 8      | 12     | 2      | 5      | 7     | 3     | 6     | 10    |
| K07318 adenine-specific DNA-methyltransferase [EC:2.1.1.72]                    | 365    | 392    | 406    | 399    | 69     | 90     | 56     | 64     | 164   | 251   | 243   | 262   |
| K07319 adenine-specific DNA-methyltransferase [EC:2.1.1.72]                    | 642    | 623    | 586    | 548    | 446    | 502    | 480    | 476    | 2052  | 2373  | 2144  | 2259  |
| K07334 toxin HlgB-1                                                            | 498    | 497    | 479    | 488    | 614    | 538    | 561    | 596    | 373   | 421   | 407   | 416   |
| K07339 mRNA interferase HicA [EC:3.1.-.-]                                      | 4      | 7      | 5      | 5      | 8      | 5      | 10     | 4      | 9     | 28    | 20    | 20    |
| K07341 death on curing protein                                                 | 192    | 217    | 214    | 221    | 78     | 64     | 77     | 71     | 357   | 375   | 410   | 421   |
| K07448 restriction system protein                                              | 416    | 449    | 465    | 435    | 286    | 325    | 285    | 281    | 198   | 248   | 213   | 219   |
| K07451 5-methylcytosine-specific restriction enzyme A [EC:3.1.21.-]            | 592    | 575    | 617    | 648    | 969    | 1022   | 1004   | 915    | 332   | 364   | 342   | 331   |
| K07452 5-methylcytosine-specific restriction enzyme B [EC:3.1.21.-]            | 976    | 882    | 931    | 880    | 1191   | 1248   | 1286   | 1183   | 666   | 679   | 671   | 713   |
| K07464 CRISPR-associated exonuclease Cas4 [EC:3.1.12.1]                        | 237    | 181    | 231    | 237    | 216    | 204    | 227    | 207    | 276   | 297   | 285   | 336   |
| K07473 DNA-damage-inducible protein J                                          | 405    | 428    | 389    | 425    | 200    | 188    | 152    | 181    | 855   | 935   | 932   | 869   |
| K07746 antitoxin ParD1/3/4                                                     | 563    | 526    | 596    | 570    | 524    | 551    | 557    | 608    | 202   | 197   | 216   | 192   |
| K09002 CRISPR-associated protein Csm3                                          | 1      | 2      | 3      | 1      | 2      | 0      | 2      | 5      | 10    | 3     | 7     | 14    |
| K09127 CRISPR-associated protein Cmr3                                          | 2      | 0      | 0      | 1      | 0      | 0      | 0      | 0      | 0     | 0     | 0     | 0     |
| K09159 antitoxin CptB                                                          | 614    | 572    | 533    | 551    | 336    | 362    | 346    | 355    | 384   | 365   | 326   | 367   |
| K09951 CRISPR-associated protein Cas2                                          | 239    | 234    | 265    | 259    | 170    | 164    | 174    | 175    | 351   | 378   | 387   | 437   |
| K09952 CRISPR-associated endonuclease Csn1 [EC:3.1.-.-]                        | 255    | 268    | 262    | 308    | 85     | 113    | 80     | 89     | 211   | 285   | 251   | 215   |
| K12148 biofilm regulator BssS                                                  | 220    | 168    | 174    | 199    | 154    | 184    | 163    | 189    | 208   | 180   | 180   | 219   |
| K12151 multiple stress resistance protein BhsA                                 | 161    | 148    | 171    | 172    | 146    | 162    | 146    | 149    | 163   | 173   | 168   | 192   |
| K13650 MqsR-controlled colanic acid and biofilm protein A                      | 93     | 109    | 85     | 90     | 25     | 31     | 34     | 36     | 215   | 214   | 241   | 211   |
| K13651 motility quorum-sensing regulator / GCU-specific mRNA interferase toxin | 2      | 4      | 2      | 1      | 0      | 0      | 2      | 0      | 0     | 0     | 0     | 1     |
| K16214 UDP-N-acetylglucosamine kinase [EC:2.7.1.176]                           | 47     | 34     | 49     | 29     | 24     | 32     | 24     | 23     | 30    | 29    | 30    | 28    |
| K18829 antitoxin VapB                                                          | 471    | 559    | 551    | 583    | 362    | 446    | 398    | 403    | 159   | 169   | 140   | 144   |
| K18837 cytoskeleton-binding toxin CbtA and related proteins                    | 8      | 9      | 12     | 7      | 8      | 8      | 3      | 12     | 89    | 81    | 87    | 101   |
| K18838 cytoskeleton bundling-enhancing protein CbeA and related proteins       | 4      | 9      | 1      | 2      | 3      | 10     | 5      | 5      | 73    | 65    | 74    | 66    |
| K18839 toxin GhoT                                                              | 0      | 1      | 1      | 0      | 0      | 2      | 0      | 2      | 2     | 10    | 13    | 3     |
| K18840 antitoxin GhoS                                                          | 0      | 1      | 1      | 0      | 5      | 1      | 4      | 7      | 26    | 7     | 13    | 12    |
| K18841 mRNA interferase ChpB [EC:3.1.-.-]                                      | 67     | 64     | 62     | 62     | 78     | 97     | 81     | 86     | 4     | 0     | 0     | 1     |
| K18842 antitoxin ChpS                                                          | 0      | 0      | 0      | 0      | 0      | 0      | 4      | 4      | 2     | 0     | 0     | 2     |
| K18843 antitoxin HicB                                                          | 8      | 11     | 9      | 13     | 24     | 22     | 18     | 17     | 34    | 40    | 51    | 44    |
| K18862 small toxic polypeptide LdrA/B/C/D                                      | 5      | 0      | 1      | 1      | 17     | 14     | 17     | 16     | 20    | 23    | 38    | 27    |
| K18919 protein HokC/D                                                          | 3      | 2      | 2      | 1      | 4      | 5      | 3      | 3      | 21    | 26    | 16    | 17    |
| K18920 protein HokA                                                            | 82     | 100    | 75     | 110    | 24     | 40     | 43     | 24     | 166   | 227   | 170   | 179   |
| K18921 protein HokE                                                            | 1      | 0      | 4      | 0      | 3      | 4      | 3      | 7      | 16    | 20    | 17    | 23    |
| K18922 protein HokK                                                            | 101    | 84     | 82     | 83     | 35     | 28     | 28     | 23     | 195   | 206   | 185   | 204   |
| K18923 antitoxin Sbd                                                           | 87     | 95     | 83     | 90     | 137    | 155    | 120    | 109    | 21    | 10    | 12    | 15    |
| K19046 CRISPR system Cascade subunit CasB                                      | 212    | 250    | 213    | 217    | 74     | 79     | 77     | 80     | 524   | 464   | 508   | 485   |
| K19048 toxic protein SymE                                                      | 328    | 325    | 320    | 318    | 230    | 254    | 267    | 240    | 331   | 392   | 379   | 364   |
| K19075 CRISPR-associated protein Cst2                                          | 0      | 4      | 3      | 0      | 4      | 0      | 0      | 0      | 0     | 0     | 5     | 0     |
| K19076 CRISPR-associated protein Cmr2                                          | 1      | 2      | 0      | 1      | 0      | 0      | 0      | 0      | 0     | 0     | 0     | 0     |
| K19088 CRISPR-associated protein Cst1                                          | 2      | 0      | 1      | 0      | 0      | 0      | 1      | 0      | 0     | 0     | 0     | 0     |
| K19090 CRISPR-associated protein CasSt                                         | 1      | 3      | 2      | 0      | 1      | 0      | 0      | 0      | 0     | 0     | 0     | 0     |
| K19091 CRISPR-associated endoribonuclease Cas6 [EC:3.1.-.-]                    | 4      | 6      | 9      | 11     | 13     | 5      | 8      | 9      | 74    | 72    | 108   | 112   |
| K19092 toxin ParE1/3/4                                                         | 884    | 862    | 808    | 875    | 697    | 810    | 677    | 800    | 295   | 288   | 286   | 292   |
| K19114 CRISPR-associated protein Csh1                                          | 3      | 7      | 2      | 3      | 7      | 3      | 6      | 7      | 62    | 47    | 50    | 63    |
| K19115 CRISPR-associated protein Csh2                                          | 4      | 11     | 18     | 7      | 9      | 15     | 13     | 15     | 101   | 122   | 82    | 109   |
| K19116 CRISPR-associated protein CasSh                                         | 9      | 9      | 8      | 8      | 14     | 5      | 13     | 6      | 64    | 94    | 77    | 66    |
| K19117 CRISPR-associated protein Csd1                                          | 418    | 477    | 486    | 464    | 494    | 488    | 492    | 504    | 395   | 467   | 404   | 413   |
| K19118 CRISPR-associated protein Csd2                                          | 626    | 604    | 657    | 607    | 266    | 301    | 298    | 268    | 380   | 482   | 420   | 497   |
| K19119 CRISPR-associated protein CasDd                                         | 442    | 428    | 396    | 457    | 213    | 182    | 182    | 197    | 318   | 367   | 299   | 320   |
| K19123 CRISPR system Cascade subunit CasA                                      | 542    | 554    | 562    | 581    | 168    | 186    | 221    | 188    | 1130  | 1049  | 1098  | 1288  |
| K19124 CRISPR system Cascade subunit CasC                                      | 390    | 358    | 405    | 389    | 130    | 142    | 150    | 147    | 763   | 833   | 833   | 844   |
| K19125 CRISPR system Cascade subunit CasD                                      | 279    | 300    | 285    | 252    | 121    | 74     | 87     | 75     | 455   | 568   | 479   | 504   |
| K19126 CRISPR system Cascade subunit CasE                                      | 241    | 236    | 233    | 280    | 80     | 84     | 93     | 68     | 494   | 544   | 547   | 580   |
| K19127 CRISPR-associated protein Csy1                                          | 1283   | 1323   | 1287   | 1318   | 720    | 671    | 708    | 714    | 469   | 496   | 438   | 445   |
| K19128 CRISPR-associated protein Csy2                                          | 593    | 554    | 576    | 522    | 287    | 330    | 312    | 312    | 195   | 216   | 198   | 217   |
| K19129 CRISPR-associated protein Csy3                                          | 1103   | 1008   | 1021   | 1060   | 568    | 535    | 568    | 602    | 365   | 346   | 369   | 341   |
| K19130 CRISPR-associated endonuclease Csy4 [EC:3.1.-.-]                        | 763    | 774    | 734    | 770    | 422    | 424    | 378    | 432    | 243   | 263   | 283   | 224   |
| K19134 CRISPR-associated protein Csx10                                         | 68     | 54     | 60     | 47     | 2      | 1      | 0      | 3      | 0     | 0     | 0     | 0     |
| K19137 CRISPR-associated protein Csn2                                          | 38     | 35     | 28     | 39     | 6      | 13     | 10     | 12     | 32    | 46    | 33    | 32    |
| K19138 CRISPR-associated protein Csm2                                          | 0      | 0      | 1      | 1      | 0      | 0      | 0      | 3      | 0     | 0     | 2     | 1     |
| K19139 CRISPR-associated protein Csm4                                          | 0      | 2      | 0      | 0      | 0      | 0      | 0      | 2      | 3     | 3     | 3     | 9     |
| K19140 CRISPR-associated protein Csm5                                          | 2      | 0      | 0      | 1      | 0      | 0      | 2      | 0      | 1     | 0     | 0     | 2     |
| K19142 CRISPR-associated protein Cmr6                                          | 0      | 0      | 2      | 2      | 0      | 0      | 0      | 0      | 0     | 1     | 0     | 0     |
| K19145 CRISPR-associated protein Csx16                                         | 1      | 0      | 0      | 0      | 0      | 0      | 0      | 1      | 0     | 0     | 0     | 0     |
| K19147 5-methylcytosine-specific restriction enzyme subunit McrC               | 576    | 628    | 600    | 619    | 724    | 762    | 824    | 804    | 264   | 225   | 229   | 287   |
| K19148 small toxic protein TssB                                                | 31     | 25     | 22     | 41     | 12     | 6      | 13     | 9      | 52    | 44    | 64    | 55    |
| K19154 small toxic protein ShoB                                                | 1      | 1      | 1      | 0      | 0      | 0      | 2      | 4      | 3     | 5     | 5     | 5     |
| K19155 toxin YwaJ [EC:3.1.-.-]                                                 | 0      | 0      | 3      | 0      | 6      | 3      | 2      | 4      | 21    | 19    | 19    | 28    |
| K19156 antitoxin PflF                                                          | 0      | 0      | 2      | 0      | 1      | 4      | 2      | 2      | 11    | 9     | 19    | 20    |
| K19157 mRNA interferase YafY [EC:3.1.-.-]                                      | 440    | 424    | 436    | 460    | 184    | 244    | 199    | 189    | 864   | 849   | 854   | 886   |
| K19158 toxin YoeB [EC:3.1.-.-]                                                 | 53     | 62     | 69     | 70     | 30     | 38     | 42     | 50     | 29    | 30    | 34    | 21    |
| K19159 antitoxin YefM                                                          | 2      | 2      | 5      | 7      | 3      | 5      | 3      | 2      | 21    | 21    | 13    | 14    |
| K19162 hha toxicity modulator TomB                                             | 214    | 249    | 218    | 249    | 179    | 164    | 183    | 182    | 339   | 322   | 335   | 307   |
| K19163 toxin CcdB                                                              | 191    | 178    | 156    | 192    | 148    | 174    | 133    | 141    | 202   | 188   | 188   | 194   |
| K19164 antitoxin CcdA                                                          | 68     | 59     | 54     | 68     | 89     | 95     | 90     | 82     | 16    | 23    | 24    | 15    |
| K19165 antitoxin Phd                                                           | 113    | 123    | 128    | 130    | 41     | 36     | 42     | 33     | 250   | 278   | 278   | 295   |
| K19166 mRNA interferase HlgB [EC:3.1.-.-]                                      | 376    | 448    | 375    | 419    | 694    | 710    | 722    | 703    | 1137  | 1240  | 1206  | 1132  |
| K19167 protein AbiQ                                                            | 2      | 1      | 0      | 3      | 3      | 4      | 12     | 8      | 0     | 0     | 0     | 0     |
| K19168 toxin CptA                                                              | 899    | 967    | 915    | 861    | 532    | 509    | 500    | 557    | 524   | 599   | 522   | 544   |
| K19169 DNA sulfur modification protein DndB                                    | 8      | 7      | 5      | 6      | 18     | 28     | 33     | 24     | 26    | 28    | 18    | 20    |
| K19170 DNA sulfur modification protein DndC                                    | 6      | 9      | 6      | 10     | 7      | 1      | 10     | 9      | 32    | 28    | 36    | 26    |
| K19171 DNA sulfur modification protein DndD                                    | 55     | 52     | 69     | 62     | 8      | 3      | 8      | 3      | 154   | 158   | 168   | 173   |
| K19172 DNA sulfur modification protein DndE                                    | 3      | 10     | 10     | 12     | 1      | 0      | 1      | 2      | 8     | 2     | 6     | 8     |
| K19175 DNA phosphorothiolation-dependent restriction protein DpTH              | 3      | 5      | 3      | 6      | 1      | 2      | 2      | 3      | 0     | 0     | 0     | 0     |
| K19334 biofilm protein TabA                                                    | 460    | 487    | 457    | 493    | 246    | 267    | 263    | 266    | 579   | 544   | 547   | 539   |
| K19686 ribonuclease VapC [EC:3.1.-.-]                                          | 0      | 0      | 0      | 0      | 0      | 0      | 0      | 0      | 0     | 2     | 0     | 1     |
| K19687 antitoxin VapB                                                          | 0      | 0      | 0      | 0      | 0      | 0      | 0      | 0      | 1     | 0     | 0     | 1     |
| K19688 biofilm regulator BssR                                                  | 207    | 231    | 236    | 231    | 166    | 186    | 153    | 163    | 376   | 349   | 333   | 310   |
| K21487 toxin YobI [EC:3.1.-.-]                                                 | 0      | 8      | 9      | 2      | 10     | 0      | 0      | 0      | 0     | 0     | 6     | 0     |
| K21488 antitoxin YobK                                                          | 98     | 79     | 99     | 98     | 363    | 309    | 381    | 373    | 267   | 227   | 279   | 261   |
| K21493 toxin YxID [EC:3.1.-.-]                                                 | 1      | 0      | 0      | 5      | 0      | 0      | 0      | 5      | 0     | 0     | 0     | 0     |
| K21495 antitoxin FitA                                                          | 1      | 0      | 0      | 0      | 0      | 0      | 0      | 0      | 0     | 1     | 1     | 1     |
| K21498 antitoxin HlgA-1                                                        | 717    | 762    | 780    | 726    | 776    | 737    | 707    | 771    | 517   | 510   | 503   | 507   |
| ko04030 G protein-coupled receptors                                            | 0      | 2      | 0      | 0      | 0      | 2      | 0      | 0      | 1     | 0     | 0     | 0     |
| ko04031 GTP-binding proteins                                                   | 0      | 0      | 1      | 0      | 1      | 0      | 0      | 1      | 0     | 0     | 0     | 1     |
| ko04090 CD molecules                                                           | 3123   | 3443   | 3555   | 3351   | 10264  | 10371  | 10615  | 10264  | 7421  | 7170  | 7332  | 6944  |
| ko00536 Glycosaminoglycan binding proteins                                     | 12786  | 12488  | 11519  | 12000  | 6736   | 6628   | 4019   | 4555   | 4275  | 3915  | 3848  | 4035  |
| ko00537 Glycosylphosphatidylinositol (GPI)-anchored proteins                   | 11270  | 11437  | 11492  | 11569  | 11459  | 11673  | 11658  | 11731  | 11295 | 11507 | 11411 | 11418 |
| ko01504 Antimicrobial resistance genes                                         | 137682 | 137214 | 134550 | 136095 | 112296 | 112557 | 108757 | 112156 | 98321 | 96351 | 95857 | 97439 |
| K00638 chloramphenicol O-acetyltransferase type B [EC:2.3.1.28]                | 906    | 991    | 926    | 948    | 535    | 503    | 464    | 543    | 334   | 271   | 271   | 300   |
| K00662 aminoglycoside 3-N-acetyltransferase [EC:2.3.1.81]                      | 164    | 149    | 137    | 154    | 12     | 16     | 14     | 10     | 162   | 156   | 193   | 164   |
| K00663 aminoglycoside 6'-N-acetyltransferase [EC:2.3.1.82]                     | 0      | 2      | 3      | 1      | 0      | 0      | 0      | 0      | 4     | 13    | 7     | 5     |
| K00897 kanamycin kinase [EC:2.7.                                               |        |        |        |        |        |        |        |        |       |       |       |       |

|                                                                                                                                     |         |         |         |         |         |         |         |         |         |         |         |         |
|-------------------------------------------------------------------------------------------------------------------------------------|---------|---------|---------|---------|---------|---------|---------|---------|---------|---------|---------|---------|
| K18235 virginiamycin B lyase [EC:4.2.99.-]                                                                                          | 1648    | 1626    | 1535    | 1623    | 949     | 925     | 486     | 554     | 488     | 520     | 517     | 545     |
| K18554 chloramphenicol 3-O phosphotransferase [EC:2.7.1.-]                                                                          | 0       | 0       | 0       | 1       | 3       | 0       | 0       | 0       | 0       | 0       | 0       | 0       |
| K18555 fluoroquinolone resistance protein                                                                                           | 0       | 0       | 0       | 0       | 0       | 0       | 0       | 0       | 5       | 2       | 0       | 4       |
| K18815 aminoglycoside 6'-N-acetyltransferase I [EC:2.3.1.82]                                                                        | 33      | 42      | 40      | 38      | 11      | 15      | 8       | 7       | 72      | 63      | 58      | 68      |
| K18816 aminoglycoside 6'-N-acetyltransferase I [EC:2.3.1.82]                                                                        | 4       | 2       | 4       | 6       | 20      | 27      | 19      | 24      | 6       | 7       | 7       | 4       |
| K19271 chloramphenicol O-acetyltransferase type A [EC:2.3.1.28]                                                                     | 1312    | 1279    | 1413    | 1391    | 1704    | 1679    | 1651    | 1761    | 1813    | 1853    | 1870    | 1871    |
| K19272 aminoglycoside 3'-phosphotransferase I [EC:2.7.1.95]                                                                         | 0       | 0       | 0       | 0       | 0       | 0       | 1       | 2       | 1       | 6       | 0       | 0       |
| K19273 streptothricin acetyltransferase [EC:2.3.-.-]                                                                                | 54      | 56      | 50      | 53      | 3       | 7       | 2       | 2       | 0       | 5       | 2       | 3       |
| K19275 aminoglycoside 3-N-acetyltransferase II [EC:2.3.1.81]                                                                        | 0       | 0       | 1       | 0       | 0       | 0       | 0       | 0       | 0       | 0       | 5       | 0       |
| K19278 aminoglycoside 6'-N-acetyltransferase Ib [EC:2.3.1.82]                                                                       | 3       | 2       | 3       | 4       | 25      | 19      | 24      | 22      | 0       | 1       | 1       | 0       |
| K19299 aminoglycoside 3'-phosphotransferase III [EC:2.7.1.95]                                                                       | 93      | 66      | 69      | 103     | 11      | 6       | 9       | 15      | 1       | 2       | 5       | 7       |
| K19300 aminoglycoside 3'-phosphotransferase II [EC:2.7.1.95]                                                                        | 1371    | 1300    | 1270    | 1315    | 705     | 745     | 672     | 740     | 422     | 348     | 424     | 424     |
| K19545 lincosamide nucleotidyltransferase A/C/D/E                                                                                   | 30      | 44      | 53      | 45      | 120     | 135     | 114     | 109     | 21      | 40      | 24      | 23      |
| K19883 bifunctional aminoglycoside 6'-N-acetyltransferase / aminoglycoside 2"-phosphotransferase [EC:2.3.1.82 2.7.1.190]            | 11      | 5       | 9       | 9       | 26      | 30      | 34      | 23      | 0       | 4       | 8       | 4       |
| K21252 fosfomicyn resistance protein FosX                                                                                           | 1       | 2       | 0       | 0       | 0       | 0       | 2       | 1       | 4       | 2       | 0       | 0       |
| K21253 glutathione S-transferase fosA [EC:2.5.1.18]                                                                                 | 691     | 611     | 558     | 628     | 347     | 302     | 284     | 348     | 205     | 175     | 167     | 211     |
| K21265 glutathione S-transferase fosA5 [EC:2.5.1.18]                                                                                | 235     | 258     | 248     | 282     | 181     | 164     | 158     | 171     | 388     | 348     | 317     | 361     |
| Not Included in Pathway or Brite                                                                                                    | 1286209 | 1286157 | 1270584 | 1287391 | 1247267 | 1255851 | 1233992 | 1242086 | 1221688 | 1222085 | 1215842 | 1223116 |
| Unclassified: metabolism                                                                                                            | 532051  | 531480  | 522219  | 529695  | 514625  | 518736  | 514880  | 515915  | 514840  | 515478  | 511658  | 516219  |
| ko9980 Enzymes with EC numbers                                                                                                      | 437737  | 437440  | 431257  | 436711  | 442535  | 445609  | 443797  | 442622  | 435652  | 435982  | 433944  | 435628  |
| K00046 gluconate 5-dehydrogenase [EC:1.1.1.69]                                                                                      | 1400    | 1484    | 1627    | 1316    | 2431    | 2388    | 2568    | 2357    | 2272    | 2269    | 2350    | 2215    |
| K00063 D-arabinose 1-dehydrogenase [EC:1.1.1.117]                                                                                   | 11      | 10      | 6       | 3       | 0       | 0       | 0       | 0       | 1       | 2       | 3       | 2       |
| K00091 dihydroflavonol-4-reductase [EC:1.1.1.219]                                                                                   | 1278    | 1344    | 1248    | 1261    | 680     | 704     | 681     | 688     | 650     | 614     | 587     | 565     |
| K00098 L-idonate 5-dehydrogenase [EC:1.1.1.264]                                                                                     | 222     | 215     | 218     | 245     | 339     | 347     | 365     | 307     | 63      | 78      | 81      | 60      |
| K00119 alcohol dehydrogenase (nicotinoprotein) [EC:1.1.99.36]                                                                       | 0       | 1       | 0       | 0       | 0       | 0       | 0       | 0       | 0       | 0       | 0       | 0       |
| K00153 5-(hydroxymethyl)mycophthiol dehydrogenase [EC:1.1.1.306]                                                                    | 1       | 0       | 0       | 0       | 0       | 1       | 0       | 0       | 0       | 0       | 0       | 0       |
| K00154 coniferyl-aldelyde dehydrogenase [EC:1.2.1.68]                                                                               | 2579    | 2568    | 2297    | 2440    | 1396    | 1421    | 1201    | 1385    | 751     | 772     | 759     | 796     |
| K00179 indolepyruvate ferredoxin oxidoreductase, alpha subunit [EC:1.2.7.8]                                                         | 1241    | 1392    | 1526    | 1362    | 3002    | 3313    | 3246    | 3171    | 2618    | 2545    | 2492    | 2465    |
| K00180 indolepyruvate ferredoxin oxidoreductase, beta subunit [EC:1.2.7.8]                                                          | 407     | 459     | 474     | 475     | 1148    | 1194    | 1137    | 1105    | 1002    | 877     | 909     | 900     |
| K00219 2,4-dienoyl-CoA reductase (NADPH2) [EC:1.3.1.134]                                                                            | 7287    | 7058    | 6376    | 7036    | 3916    | 3939    | 3732    | 4163    | 3648    | 3562    | 3319    | 3687    |
| K00221 alkylmercury lyase [EC:4.99.1.2]                                                                                             | 0       | 0       | 0       | 0       | 0       | 0       | 0       | 0       | 0       | 0       | 1       | 3       |
| K00298 N5-(carboxyethyl)ornithine synthase [EC:1.5.1.24]                                                                            | 1       | 2       | 1       | 3       | 19      | 23      | 28      | 15      | 0       | 0       | 0       | 1       |
| K00311 electron-transferring-flavoprotein dehydrogenase [EC:1.5.5.1]                                                                | 2197    | 2191    | 2092    | 2242    | 1201    | 1200    | 1126    | 1233    | 696     | 625     | 712     | 678     |
| K00313 electron transfer flavoprotein-quinone oxidoreductase [EC:1.5.5.-]                                                           | 614     | 578     | 641     | 627     | 905     | 938     | 1021    | 911     | 369     | 342     | 347     | 313     |
| K00344 NADPH:quinone reductase [EC:1.6.5.5]                                                                                         | 3174    | 3057    | 2843    | 3074    | 1914    | 1986    | 2004    | 2169    | 1662    | 1443    | 1452    | 1557    |
| K00346 Na+-transporting NADH:ubiquinone oxidoreductase subunit A [EC:7.2.2.1]                                                       | 2033    | 1991    | 2147    | 2017    | 2131    | 2081    | 2104    | 2109    | 1554    | 1414    | 1458    | 1484    |
| K00347 Na+-transporting NADH:ubiquinone oxidoreductase subunit B [EC:7.2.2.1]                                                       | 2884    | 2973    | 3022    | 2953    | 3406    | 3504    | 3470    | 3595    | 3299    | 3214    | 3213    | 3120    |
| K00348 Na+-transporting NADH:ubiquinone oxidoreductase subunit C [EC:7.2.2.1]                                                       | 1606    | 1610    | 1737    | 1753    | 1971    | 2027    | 2094    | 2018    | 1811    | 1826    | 1787    | 1764    |
| K00349 Na+-transporting NADH:ubiquinone oxidoreductase subunit D [EC:7.2.2.1]                                                       | 1341    | 1369    | 1288    | 1220    | 1709    | 1678    | 1751    | 1678    | 1709    | 1518    | 1532    | 1583    |
| K00350 Na+-transporting NADH:ubiquinone oxidoreductase subunit E [EC:7.2.2.1]                                                       | 1432    | 1380    | 1506    | 1402    | 1692    | 1676    | 1604    | 1723    | 1578    | 1518    | 1526    | 1495    |
| K00351 Na+-transporting NADH:ubiquinone oxidoreductase subunit F [EC:7.2.2.1]                                                       | 1102    | 1198    | 1197    | 1204    | 2510    | 2644    | 2621    | 2560    | 2428    | 2301    | 2363    | 2376    |
| K00354 NADPH2 dehydrogenase [EC:1.6.99.1]                                                                                           | 15      | 5       | 7       | 7       | 3       | 5       | 3       | 3       | 15      | 8       | 9       | 7       |
| K00428 cytochrome c peroxidase [EC:1.11.1.5]                                                                                        | 1524    | 1414    | 1517    | 1574    | 955     | 865     | 836     | 845     | 595     | 562     | 552     | 585     |
| K00433 non-heme chloroperoxidase [EC:1.11.1.10]                                                                                     | 1314    | 1203    | 1202    | 1271    | 521     | 517     | 487     | 511     | 1216    | 1162    | 1258    | 1182    |
| K00437 [NifE] hydrogenase large subunit [EC:1.12.2.1]                                                                               | 14      | 16      | 11      | 15      | 3       | 5       | 6       | 2       | 9       | 32      | 15      | 21      |
| K00520 mercuric reductase [EC:1.16.1.1]                                                                                             | 3453    | 3328    | 3393    | 3341    | 2355    | 2357    | 2394    | 2327    | 962     | 928     | 848     | 875     |
| K00532 ferredoxin hydrogenase [EC:1.12.7.2]                                                                                         | 0       | 2       | 5       | 0       | 0       | 0       | 0       | 0       | 13      | 15      | 10      | 14      |
| K00533 ferredoxin hydrogenase large subunit [EC:1.12.7.2]                                                                           | 30      | 33      | 33      | 32      | 23      | 31      | 45      | 43      | 40      | 40      | 57      | 50      |
| K00534 ferredoxin hydrogenase small subunit [EC:1.12.7.2]                                                                           | 2       | 2       | 2       | 1       | 2       | 2       | 1       | 1       | 1       | 0       | 0       | 0       |
| K00537 arsenate reductase (glutaredoxin) [EC:1.20.4.1]                                                                              | 1549    | 1533    | 1649    | 1645    | 1707    | 1747    | 1747    | 1747    | 1614    | 1466    | 1612    | 1653    |
| K00573 protein-L-isoaspartate(D-aspartate) O-methyltransferase [EC:2.1.1.77]                                                        | 1440    | 1403    | 1296    | 1384    | 823     | 873     | 822     | 821     | 827     | 851     | 827     | 826     |
| K00574 cyclopropane-fatty-acyl-phospholipid synthase [EC:2.1.1.79]                                                                  | 4102    | 3968    | 3878    | 4032    | 2403    | 2470    | 2445    | 2540    | 3089    | 3323    | 2982    | 3308    |
| K00598 trans-aconitate 2-methyltransferase [EC:2.1.1.144]                                                                           | 1470    | 1536    | 1405    | 1499    | 775     | 763     | 732     | 774     | 958     | 1036    | 968     | 1080    |
| K00612 carbamoyltransferase [EC:2.1.3.-]                                                                                            | 4885    | 4813    | 4695    | 4599    | 2587    | 2488    | 2580    | 2818    | 1604    | 1484    | 1378    | 1500    |
| K00633 galactoside O-acetyltransferase [EC:2.3.1.18]                                                                                | 179     | 178     | 188     | 173     | 106     | 146     | 237     | 220     | 287     | 283     | 309     | 318     |
| K00661 maltose O-acetyltransferase [EC:2.3.1.79]                                                                                    | 1866    | 1709    | 1868    | 1765    | 2611    | 2835    | 2581    | 2498    | 3133    | 3199    | 3257    | 3178    |
| K00675 N-hydroxyarylamine O-acetyltransferase [EC:2.3.1.118]                                                                        | 1849    | 1860    | 1832    | 1827    | 1146    | 1063    | 1028    | 1103    | 1285    | 1193    | 1203    | 1176    |
| K00684 leucyl/phenylalanyl-tRNA--protein transferase [EC:2.3.2.6]                                                                   | 1330    | 1296    | 1304    | 1409    | 867     | 799     | 863     | 780     | 953     | 838     | 850     | 924     |
| K00754 L-malate glycosyltransferase [EC:2.4.1.-]                                                                                    | 0       | 3       | 0       | 1       | 2       | 3       | 0       | 1       | 0       | 0       | 0       | 1       |
| K00786 glycosyltransferase [EC:2.4.-.-]                                                                                             | 34      | 18      | 47      | 31      | 5       | 5       | 9       | 5       | 30      | 32      | 36      | 29      |
| K00809 deoxyxysine synthase [EC:2.5.1.46]                                                                                           | 1       | 2       | 2       | 3       | 2       | 2       | 1       | 0       | 3       | 10      | 2       | 12      |
| K00862 erythritol kinase (D-erythritol 1-phosphate-forming) [EC:2.7.1.215]                                                          | 1       | 1       | 0       | 0       | 0       | 2       | 0       | 0       | 0       | 4       | 1       | 0       |
| K00906 isocitrate dehydrogenase kinase/phosphatase [EC:2.7.11.5 3.1.3.-]                                                            | 3721    | 3643    | 3445    | 3612    | 2290    | 2252    | 2120    | 2079    | 2278    | 2493    | 2246    | 2354    |
| K00924 kinase [EC:2.7.1.-]                                                                                                          | 1       | 0       | 0       | 0       | 0       | 0       | 0       | 0       | 0       | 0       | 0       | 0       |
| K00982 [glutamine synthetase] adenylyltransferase / [glutamine synthetase]-adenylyl-L-tyrosine phosphorylase [EC:2.7.7.42 2.7.7.89] | 6777    | 6719    | 6589    | 6610    | 3951    | 4214    | 4150    | 4148    | 4419    | 4080    | 3935    | 4426    |
| K00986 RNA-directed DNA polymerase [EC:2.7.7.49]                                                                                    | 5336    | 5187    | 5345    | 5269    | 2996    | 2902    | 2742    | 2906    | 1716    | 1725    | 1833    | 1793    |
| K01002 phosphoglycerol transferase [EC:2.7.8.20]                                                                                    | 1309    | 1476    | 1377    | 1487    | 1057    | 1048    | 1014    | 982     | 2004    | 2073    | 2075    | 2255    |
| K01023 arylsulfate sulfotransferase [EC:2.8.2.22]                                                                                   | 2643    | 2566    | 2575    | 2522    | 1939    | 1994    | 1948    | 1921    | 2644    | 2590    | 2688    | 2558    |
| K01050 cholinesterase [EC:3.1.1.8]                                                                                                  | 4       | 2       | 2       | 1       | 0       | 0       | 0       | 0       | 4       | 4       | 3       | 3       |
| K01066 acetyl esterase [EC:3.1.1.-]                                                                                                 | 2189    | 2314    | 2216    | 2225    | 1520    | 1457    | 1434    | 1513    | 1507    | 1518    | 1397    | 1528    |
| K01073 acyl-CoA hydrolase [EC:3.1.2.20]                                                                                             | 0       | 0       | 0       | 1       | 0       | 0       | 0       | 0       | 0       | 1       | 0       | 0       |
| K01090 protein phosphatase [EC:3.1.3.16]                                                                                            | 4       | 4       | 2       | 1       | 2       | 0       | 2       | 0       | 0       | 0       | 0       | 0       |
| K01118 FMN-dependent NADH-azoreductase [EC:1.7.1.17]                                                                                | 2408    | 2436    | 2353    | 2345    | 1337    | 1369    | 1327    | 1450    | 1638    | 1596    | 1487    | 1602    |
| K01133 choline-sulfatase [EC:3.1.6.6]                                                                                               | 3914    | 3944    | 3938    | 3804    | 4225    | 4374    | 4159    | 4385    | 3245    | 3226    | 3194    | 3086    |
| K01138 uncharacterized sulfatase [EC:3.1.6.-]                                                                                       | 31      | 28      | 34      | 48      | 48      | 67      | 66      | 51      | 187     | 241     | 209     | 183     |
| K01143 exodeoxyribonuclease (lambda-induced) [EC:3.1.11.3]                                                                          | 0       | 0       | 0       | 0       | 1       | 5       | 5       | 4       | 8       | 2       | 1       | 3       |
| K01144 exodeoxyribonuclease V [EC:3.1.11.5]                                                                                         | 232     | 236     | 248     | 277     | 501     | 483     | 529     | 538     | 202     | 238     | 234     | 229     |
| K01150 deoxyribonuclease I [EC:3.1.21.1]                                                                                            | 1512    | 1506    | 1472    | 1503    | 915     | 947     | 822     | 929     | 976     | 992     | 1024    | 1030    |
| K01174 micrococcal nuclease [EC:3.1.31.1]                                                                                           | 76      | 44      | 50      | 70      | 4       | 1       | 9       | 13      | 39      | 46      | 34      | 52      |
| K01175 esterase [EC:3.1.-.-]                                                                                                        | 485     | 499     | 456     | 487     | 350     | 358     | 288     | 331     | 572     | 705     | 634     | 715     |
| K01180 endo-1,3(4)-beta-glucanase [EC:3.2.1.6]                                                                                      | 0       | 0       | 0       | 0       | 0       | 0       | 0       | 1       | 2       | 0       | 0       | 0       |
| K01181 endo-1,4-beta-xylanase [EC:3.2.1.8]                                                                                          | 1114    | 1306    | 1424    | 1342    | 4610    | 4266    | 4559    | 4452    | 3280    | 3120    | 3293    | 3066    |
| K01185 lysozyme [EC:3.2.1.17]                                                                                                       | 1091    | 1088    | 1207    | 1150    | 2493    | 2542    | 2547    | 2546    | 1575    | 1490    | 1500    | 1635    |
| K01215 glucan 1,6-alpha-glucosidase [EC:3.2.1.70]                                                                                   | 136     | 188     | 167     | 195     | 46      | 32      | 42      | 24      | 208     | 229     | 206     | 239     |
| K01219 beta-agarase [EC:3.2.1.81]                                                                                                   | 1       | 4       | 1       | 0       | 0       | 0       | 0       | 0       | 0       | 0       | 1       | 0       |
| K01224 arabinogalactan endo-1,4-beta-galactosidase [EC:3.2.1.89]                                                                    | 1045    | 1043    | 1061    | 1079    | 986     | 1009    | 1044    | 975     | 916     | 977     | 927     | 1003    |
| K01235 alpha-glucuronidase [EC:3.2.1.139]                                                                                           | 1903    | 2004    | 2062    | 1937    | 5592    | 5467    | 5654    | 5562    | 4759    | 4623    | 4946    | 4528    |
| K01250 pyrimidine-specific ribonucleoside hydrolase [EC:3.2.-.-]                                                                    | 946     | 853     | 924     | 922     | 505     | 487     | 478     | 455     | 974     | 1056    | 966     | 1101    |
| K01274 D-alanyl-D-alanine dipeptidase [EC:3.4.13.-]                                                                                 | 0       | 0       | 0       | 0       | 0       | 0       | 1       | 0       | 0       | 0       | 2       | 3       |
| K01286 D-alanyl-D-alanine carboxypeptidase [EC:3.4.16.4]                                                                            | 104     | 72      | 99      | 75      | 8       | 16      | 17      | 10      | 76      | 120     | 119     | 108     |
| K01447 N-acetylmuramoyl-L-alanine amidase [EC:3.5.1.28]                                                                             | 1357    | 1312    | 1259    | 1281    | 1170    | 1172    | 1032    | 1220    | 735     | 673     | 731     | 714     |
| K01449 N-acetylmuramoyl-L-alanine amidase [EC:3.5.1.28]                                                                             | 340     | 370     | 338     | 429     | 110     | 129     | 125     | 84      | 275     | 349     | 329     | 365     |
| K01461 N-acyl-D-glutamate deacylase [EC:3.5.1.82]                                                                                   | 0       | 0       | 0       | 0       | 0       | 0       | 0       | 0       | 1       | 0       | 0       | 0       |
| K01462 peptide deformylase [EC:3.5.1.88]                                                                                            | 2994    | 2874    | 3015    | 2838    | 2477    | 2504    | 2611    | 2642    | 2395    | 2516    | 2458    | 2478    |
| K01463 N-acetylglucosamine malate deacetylase 1 [EC:3.5.1.-]                                                                        | 25      | 18      | 18      | 33      | 1       | 0       | 0       | 0       | 61      | 60      | 57      | 62      |
| K01475 isatin hydrolase [EC:3.5.2.20]                                                                                               | 0       | 0       | 1       | 1       | 1       | 2       |         |         |         |         |         |         |

|                                                                                                  |       |      |      |      |       |       |       |       |       |       |       |       |
|--------------------------------------------------------------------------------------------------|-------|------|------|------|-------|-------|-------|-------|-------|-------|-------|-------|
| K02352 lactonase [EC:3.1.1.-]                                                                    | 239   | 238  | 271  | 287  | 71    | 54    | 61    | 65    | 561   | 643   | 581   | 607   |
| K02431 L-fucose mutarotase [EC:5.1.3.29]                                                         | 340   | 334  | 285  | 339  | 91    | 107   | 119   | 128   | 639   | 668   | 638   | 632   |
| K02467 arabinose 5-phosphate isomerase [EC:5.3.1.13]                                             | 566   | 590  | 548  | 637  | 390   | 398   | 424   | 414   | 852   | 775   | 841   | 856   |
| K02558 UDP-N-acetylmuramate: L-alanyl-gamma-D-glutamyl-meso-diaminopimelate ligase [EC:6.3.2.45] | 3195  | 3127 | 2938 | 3029 | 1924  | 1959  | 1902  | 1978  | 2038  | 2079  | 1810  | 2016  |
| K02846 N-methyl-L-tryptophan oxidase [EC:1.5.3.-]                                                | 573   | 612  | 586  | 605  | 402   | 416   | 393   | 449   | 884   | 907   | 877   | 888   |
| K03207 colanic acid biosynthesis protein WcaH [EC:3.6.1.-]                                       | 110   | 63   | 69   | 74   | 129   | 129   | 127   | 141   | 29    | 36    | 31    | 26    |
| K03387 alkyl hydroperoxide reductase subunit F [EC:1.6.4.-]                                      | 2467  | 2508 | 2509 | 2517 | 4401  | 4369  | 4239  | 4367  | 3952  | 3967  | 3993  | 3895  |
| K03424 TatD DNase family protein [EC:3.1.21.-]                                                   | 6516  | 6707 | 6477 | 6518 | 6537  | 6717  | 6481  | 6635  | 6397  | 6483  | 6037  | 6214  |
| K03478 chitin disaccharide deacetylase [EC:3.5.1.105]                                            | 460   | 460  | 435  | 469  | 283   | 324   | 294   | 299   | 590   | 673   | 657   | 669   |
| K03518 aerobic carbon-monoxide dehydrogenase small subunit [EC:1.2.5.3]                          | 751   | 741  | 709  | 706  | 173   | 204   | 204   | 197   | 516   | 554   | 535   | 512   |
| K03519 aerobic carbon-monoxide dehydrogenase medium subunit [EC:1.2.5.3]                         | 86    | 80   | 80   | 74   | 14    | 12    | 15    | 20    | 58    | 62    | 71    | 47    |
| K03520 aerobic carbon-monoxide dehydrogenase large subunit [EC:1.2.5.3]                          | 0     | 1    | 2    | 1    | 0     | 0     | 0     | 1     | 0     | 3     | 2     | 3     |
| K03534 L-rhamnose mutarotase [EC:5.1.3.32]                                                       | 827   | 854  | 836  | 928  | 1732  | 1736  | 1785  | 1735  | 1475  | 1547  | 1571  | 1534  |
| K03564 peroxidoxin Q/BCP [EC:1.11.1.15]                                                          | 1489  | 1524 | 1465 | 1572 | 1628  | 1607  | 1641  | 1589  | 1507  | 1512  | 1552  | 1468  |
| K03578 ATP-dependent helicase HrpA [EC:3.6.4.13]                                                 | 8193  | 8066 | 7896 | 8087 | 4979  | 4854  | 4632  | 5044  | 5089  | 5048  | 4972  | 5300  |
| K03579 ATP-dependent helicase HrpB [EC:3.6.4.13]                                                 | 2635  | 2606 | 2287 | 2537 | 1634  | 1599  | 1786  | 1847  | 2407  | 2238  | 2337  | 2415  |
| K03614 Na+-translocating ferredoxin:NAD+ oxidoreductase subunit D [EC:7.2.1.2]                   | 1788  | 1881 | 1906 | 1932 | 2678  | 2690  | 2784  | 2637  | 2813  | 2798  | 2721  | 2671  |
| K03615 Na+-translocating ferredoxin:NAD+ oxidoreductase subunit C [EC:7.2.1.2]                   | 2458  | 2390 | 2561 | 2449 | 3378  | 3511  | 3813  | 3847  | 3713  | 3866  | 3575  | 3671  |
| K03616 Na+-translocating ferredoxin:NAD+ oxidoreductase subunit B [EC:7.2.1.2]                   | 1459  | 1487 | 1442 | 1434 | 2233  | 2227  | 2099  | 2110  | 2132  | 2182  | 2129  | 2002  |
| K03716 spore photoproduct lyase [EC:4.1.99.14]                                                   | 384   | 345  | 417  | 334  | 77    | 69    | 82    | 63    | 409   | 459   | 388   | 458   |
| K03725 archaea-specific helicase [EC:3.6.4.-]                                                    | 0     | 2    | 3    | 2    | 1     | 3     | 3     | 2     | 4     | 13    | 2     | 10    |
| K03726 helicase [EC:3.6.4.-]                                                                     | 847   | 850  | 781  | 872  | 330   | 352   | 337   | 314   | 2230  | 2165  | 2111  | 2204  |
| K03727 ATP-dependent RNA helicase Hely [EC:3.6.4.-]                                              | 4     | 3    | 2    | 5    | 3     | 4     | 3     | 7     | 10    | 23    | 12    | 11    |
| K03734 FAD:protein FMN transferase [EC:2.7.1.180]                                                | 4499  | 4658 | 4617 | 4611 | 5895  | 5853  | 6076  | 5804  | 5568  | 5231  | 5525  | 5470  |
| K03741 arsenate reductase (thioredoxin) [EC:1.20.4.4]                                            | 1149  | 1264 | 1242 | 1212 | 1661  | 1661  | 1592  | 1723  | 1019  | 983   | 1065  | 1011  |
| K03793 pteridine reductase [EC:1.5.1.3]                                                          | 0     | 0    | 0    | 0    | 2     | 0     | 1     | 0     | 0     | 6     | 3     | 2     |
| K03802 cyanophycin synthetase [EC:6.3.2.29 6.3.2.30]                                             | 5     | 3    | 3    | 2    | 0     | 0     | 0     | 0     | 15    | 9     | 13    | 22    |
| K03813 molybdenum transport protein [EC:2.4.2.-]                                                 | 20    | 26   | 24   | 46   | 67    | 43    | 45    | 59    | 114   | 85    | 94    | 82    |
| K03818 putative colanic acid biosynthesis acetyltransferase WcaF [EC:2.3.1.-]                    | 244   | 242  | 252  | 252  | 489   | 524   | 530   | 516   | 216   | 239   | 248   | 243   |
| K03819 putative colanic acid biosynthesis acetyltransferase WcaB [EC:2.3.1.-]                    | 91    | 83   | 84   | 100  | 137   | 169   | 118   | 138   | 19    | 23    | 17    | 23    |
| K03820 apolipoprotein N-acyltransferase [EC:2.3.1.269]                                           | 3562  | 3430 | 3239 | 3323 | 2136  | 2127  | 2022  | 2093  | 2118  | 2050  | 1963  | 2117  |
| K03824 putative acetyltransferase [EC:2.3.1.-]                                                   | 1658  | 1765 | 1588 | 1743 | 1061  | 1021  | 1018  | 958   | 844   | 849   | 894   | 904   |
| K03825 putative acetyltransferase [EC:2.3.1.-]                                                   | 765   | 758  | 745  | 792  | 500   | 496   | 536   | 496   | 628   | 615   | 516   | 544   |
| K03826 putative acetyltransferase [EC:2.3.1.-]                                                   | 542   | 528  | 579  | 557  | 221   | 272   | 252   | 274   | 643   | 657   | 612   | 706   |
| K03827 putative acetyltransferase [EC:2.3.1.-]                                                   | 2075  | 2110 | 2133 | 2053 | 3205  | 3421  | 3404  | 3456  | 2816  | 2875  | 2777  | 2809  |
| K03828 putative acetyltransferase [EC:2.3.1.-]                                                   | 319   | 353  | 312  | 320  | 203   | 219   | 248   | 234   | 421   | 437   | 361   | 465   |
| K03829 putative acetyltransferase [EC:2.3.1.-]                                                   | 198   | 174  | 178  | 175  | 139   | 193   | 161   | 133   | 200   | 227   | 220   | 254   |
| K03830 putative acetyltransferase [EC:2.3.1.-]                                                   | 162   | 203  | 203  | 227  | 64    | 90    | 69    | 99    | 448   | 434   | 476   | 434   |
| K03924 MoxR-like ATPase [EC:3.6.3.-]                                                             | 8085  | 8174 | 8050 | 7997 | 10280 | 10356 | 10491 | 10375 | 8894  | 8407  | 8921  | 8443  |
| K03928 carboxylesterase [EC:3.1.1.1]                                                             | 61    | 73   | 69   | 55   | 8     | 16    | 4     | 11    | 90    | 97    | 81    | 95    |
| K03929 para-nitrobenzyl esterase [EC:3.1.1.1-]                                                   | 1389  | 1248 | 1218 | 1308 | 723   | 748   | 743   | 767   | 1806  | 1921  | 1763  | 1807  |
| K03930 putative tributyrin esterase [EC:3.1.1.-]                                                 | 59    | 60   | 74   | 51   | 18    | 16    | 12    | 16    | 48    | 87    | 52    | 68    |
| K04068 anaerobic ribonucleoside-triphosphate reductase activating protein [EC:1.97.1.4]          | 1883  | 1836 | 1744 | 1872 | 2029  | 1969  | 1939  | 1999  | 1617  | 1731  | 1769  | 1794  |
| K04069 pyruvate formate lyase activating enzyme [EC:1.97.1.4]                                    | 3999  | 4058 | 3947 | 3956 | 4240  | 4306  | 4357  | 4217  | 5173  | 5430  | 5107  | 5439  |
| K04070 putative pyruvate formate lyase activating enzyme [EC:1.97.1.4]                           | 488   | 459  | 417  | 466  | 115   | 167   | 162   | 154   | 442   | 462   | 500   | 501   |
| K04087 membrane protease subunit HfK [EC:3.4.-]                                                  | 2837  | 2926 | 2818 | 2785 | 1755  | 1698  | 1630  | 1845  | 1619  | 1679  | 1492  | 1761  |
| K04088 membrane protease subunit HfK [EC:3.4.-]                                                  | 2223  | 2315 | 2242 | 2270 | 1347  | 1503  | 1307  | 1356  | 1477  | 1508  | 1526  | 1487  |
| K04766 acetoin utilization protein AcuA [EC:2.3.1.-]                                             | 2     | 0    | 0    | 0    | 0     | 0     | 0     | 0     | 0     | 0     | 0     | 0     |
| K04844 hypothetical glycosyl hydrolase [EC:3.2.1.-]                                              | 505   | 454  | 476  | 451  | 165   | 200   | 161   | 133   | 340   | 425   | 432   | 447   |
| K04940 opine dehydrogenase [EC:1.5.1.28]                                                         | 64    | 76   | 57   | 46   | 132   | 133   | 138   | 114   | 99    | 103   | 98    | 123   |
| K05303 O-methyltransferase [EC:2.1.1.-]                                                          | 14    | 16   | 10   | 15   | 10    | 13    | 20    | 11    | 0     | 0     | 1     | 2     |
| K05521 ADP-ribosyl-(dinucleotide)-hydrolase [EC:3.2.2.24]                                        | 48    | 55   | 52   | 45   | 62    | 111   | 64    | 89    | 0     | 0     | 0     | 0     |
| K05715 2-phosphoglycerate kinase [EC:2.7.2.-]                                                    | 0     | 0    | 2    | 0    | 0     | 0     | 0     | 1     | 2     | 3     | 1     | 9     |
| K05716 cyclic 2,3-diphosphoglycerate synthetase [EC:4.6.1.-]                                     | 0     | 0    | 0    | 0    | 0     | 0     | 0     | 0     | 4     | 14    | 6     | 9     |
| K05810 polyphenol oxidase [EC:1.10.3.-]                                                          | 2883  | 2920 | 2931 | 2928 | 2973  | 2759  | 2945  | 2829  | 3200  | 2995  | 3186  | 3137  |
| K05882 aryl-alcohol dehydrogenase (NADP+) [EC:1.1.1.91]                                          | 0     | 0    | 0    | 1    | 0     | 0     | 0     | 1     | 0     | 0     | 0     | 0     |
| K05886 serine 3-dehydrogenase (NADP+) [EC:1.1.1.276]                                             | 0     | 4    | 2    | 1    | 0     | 0     | 2     | 1     | 1     | 0     | 1     | 0     |
| K05888 L-gulonono-1,4-lactone dehydrogenase [EC:1.1.2.-]                                         | 2708  | 2757 | 2733 | 2740 | 1838  | 1748  | 1722  | 1763  | 894   | 788   | 829   | 738   |
| K05910 NADH peroxidase [EC:1.1.1.11-]                                                            | 55    | 65   | 72   | 48   | 18    | 25    | 24    | 28    | 94    | 84    | 91    | 93    |
| K05919 superoxide reductase [EC:1.15.1.2]                                                        | 682   | 606  | 611  | 644  | 251   | 274   | 300   | 253   | 447   | 462   | 480   | 522   |
| K05922 quinone-reactive Ni/Fe-hydrogenase large subunit [EC:1.12.5.1]                            | 0     | 0    | 0    | 0    | 0     | 0     | 0     | 0     | 0     | 0     | 0     | 1     |
| K05970 sialate O-acetyltransferase [EC:3.1.1.53]                                                 | 7102  | 7807 | 8283 | 7434 | 23314 | 23653 | 24167 | 23593 | 17506 | 16863 | 18058 | 16656 |
| K05985 ribonuclease MS [EC:3.1.26.8]                                                             | 93    | 71   | 93   | 92   | 38    | 49    | 59    | 41    | 59    | 82    | 87    | 93    |
| K05989 alpha-L-rhamnosidase [EC:3.2.1.40]                                                        | 8454  | 8889 | 9485 | 8975 | 23443 | 22912 | 23681 | 22780 | 19571 | 18763 | 19771 | 18592 |
| K06015 N-acyl-D-amino-acid deacylase [EC:3.5.1.81]                                               | 10659 | 1055 | 967  | 1045 | 259   | 245   | 278   | 228   | 1460  | 1673  | 1548  | 1674  |
| K06023 Hpr kinase/phosphorylase [EC:2.7.11.- 2.7.4.-]                                            | 580   | 577  | 505  | 563  | 199   | 192   | 205   | 180   | 552   | 690   | 550   | 592   |
| K06113 arabinan endo-1,5-alpha-L-arabinosidase [EC:3.2.1.99]                                     | 2654  | 2818 | 2955 | 2839 | 9865  | 9926  | 9938  | 9754  | 7232  | 7007  | 7367  | 6918  |
| K06137 pyrroloquinoline-quinone synthase [EC:1.3.3.11]                                           | 1346  | 1239 | 1188 | 1226 | 601   | 586   | 536   | 598   | 840   | 840   | 824   | 890   |
| K06139 PqqA peptide cyclase [EC:1.21.98.4]                                                       | 380   | 368  | 387  | 413  | 111   | 112   | 98    | 115   | 832   | 826   | 754   | 815   |
| K06221 2,5-diketo-D-gluconate reductase A [EC:1.1.1.346]                                         | 674   | 642  | 681  | 677  | 343   | 459   | 427   | 382   | 884   | 987   | 907   | 984   |
| K06222 2,5-diketo-D-gluconate reductase B [EC:1.1.1.346]                                         | 1712  | 1695 | 1471 | 1676 | 835   | 791   | 705   | 892   | 1092  | 1113  | 1113  | 1023  |
| K06324 spore coat protein A, manganese oxidase [EC:1.16.3.3]                                     | 3     | 2    | 5    | 1    | 0     | 0     | 0     | 0     | 0     | 4     | 3     | 6     |
| K06379 stage II sporulation protein AB (anti-sigma F factor) [EC:2.7.11.1]                       | 217   | 264  | 249  | 204  | 84    | 70    | 73    | 63    | 208   | 224   | 209   | 267   |
| K06382 stage II sporulation protein E [EC:3.1.3.16]                                              | 808   | 797  | 789  | 758  | 229   | 280   | 275   | 236   | 598   | 671   | 648   | 653   |
| K06441 ferredoxin hydrogenase gamma subunit [EC:1.12.7.2]                                        | 31    | 44   | 33   | 29   | 45    | 63    | 65    | 49    | 52    | 50    | 53    | 44    |
| K06607 myo-inositol catabolism protein IotS [EC:1.1.1.-]                                         | 3     | 0    | 2    | 1    | 5     | 2     | 1     | 5     | 10    | 26    | 7     | 9     |
| K06864 pyridinium-3,5-bis(carboxylic acid) mononucleotide sulfuryltransferase [EC:4.4.1.37]      | 383   | 357  | 372  | 331  | 88    | 97    | 113   | 108   | 357   | 404   | 431   | 437   |
| K06898 pyridinium-3,5-bis(carboxylic acid) mononucleotide synthase [EC:2.5.1.143]                | 422   | 452  | 372  | 390  | 148   | 142   | 151   | 139   | 388   | 465   | 455   | 420   |
| K06937 7,8-dihydro-6-hydroxymethylpterin dimethyltransferase [EC:2.1.1.-]                        | 76    | 76   | 59   | 76   | 49    | 38    | 42    | 48    | 155   | 191   | 166   | 198   |
| K06988 8-hydroxy-5-deazaflavin:NADPH oxidoreductase [EC:1.5.1.40]                                | 3     | 2    | 2    | 5    | 5     | 2     | 11    | 5     | 0     | 8     | 5     | 6     |
| K07037 cyclic-di-AMP phosphodiesterase PgpH [EC:3.1.4.-]                                         | 1483  | 1586 | 1688 | 1598 | 4884  | 4914  | 4959  | 4555  | 3560  | 3388  | 3684  | 3574  |
| K07053 3',5'-nucleoside bisphosphate phosphatase [EC:3.1.3.97]                                   | 2618  | 2540 | 2427 | 2630 | 1148  | 1195  | 1147  | 1211  | 2052  | 2180  | 2044  | 2116  |
| K07067 diadenylate cyclase [EC:2.7.7.85]                                                         | 3     | 11   | 3    | 1    | 2     | 0     | 0     | 0     | 2     | 9     | 7     | 7     |
| K07094 putative glycerol-1-phosphate prenyltransferase [EC:2.5.1.-]                              | 2     | 0    | 0    | 0    | 0     | 0     | 0     | 0     | 0     | 0     | 0     | 0     |
| K07107 acyl-CoA thioester hydrolase [EC:3.1.2.-]                                                 | 5006  | 5099 | 4991 | 5009 | 4382  | 4330  | 4180  | 4439  | 3229  | 3235  | 3166  | 3101  |
| K07116 acyl-homoserine-lactone acylase [EC:3.5.1.97]                                             | 6946  | 6846 | 6694 | 6684 | 3790  | 3704  | 3469  | 3880  | 2128  | 2102  | 1932  | 2052  |
| K07132 ATP-dependent target DNA activator [EC:3.6.1.3]                                           | 41    | 44   | 44   | 46   | 86    | 92    | 70    | 71    | 90    | 96    | 86    | 111   |
| K07147 methionine sulfoxide reductase catalytic subunit [EC:1.8.-]                               | 2309  | 2305 | 2279 | 2321 | 1399  | 1487  | 1383  | 1508  | 1380  | 1394  | 1444  | 1535  |
| K07223 porphyrinogen peroxidase [EC:1.1.1.11-]                                                   | 1214  | 2286 | 2287 | 2207 | 2640  | 2633  | 2674  | 2761  | 2402  | 2182  | 2260  | 2279  |
| K07229 ferric-chelate reductase (NADPH) [EC:1.16.1.9]                                            | 471   | 491  | 421  | 531  | 338   | 393   | 380   | 372   | 537   | 684   | 632   | 679   |
| K07271 lipopolysaccharide cholinephosphotransferase [EC:2.7.8.-]                                 | 1789  | 1805 | 2012 | 1893 | 3883  | 3959  | 3993  | 3810  | 3262  | 3129  | 3477  | 3214  |
| K07302 isoquinoline 1-oxidoreductase subunit alpha [EC:1.3.99.16]                                | 1157  | 1148 | 1094 | 1097 | 609   | 593   | 569   | 615   | 388   | 299   | 346   | 354   |
| K07303 isoquinoline 1-oxidoreductase subunit beta [EC:1.3.99.16]                                 | 6365  | 6231 | 5595 | 5976 | 3307  | 3043  | 2916  | 3420  | 2050  | 1745  | 1688  | 1832  |
| K07304 peptide-methionine (S)-S-oxide reductase [EC:1.8.4.11]                                    | 1547  | 1401 | 1379 | 1397 | 918   | 850   | 828   | 929   | 1025  | 1005  | 1000  | 969   |
| K07305 peptide-methionine (R)-S-oxide reductase [EC:1.8.4.12]                                    | 828   | 831  | 789  | 764  | 505   |       |       |       |       |       |       |       |

|                                                                                                                            |      |      |      |      |      |      |      |      |      |      |      |      |
|----------------------------------------------------------------------------------------------------------------------------|------|------|------|------|------|------|------|------|------|------|------|------|
| K09022 2-iminobutanoate/2-iminopropanoate deaminase [EC:3.5.99.10]                                                         | 895  | 1002 | 1112 | 1053 | 1081 | 1150 | 1163 | 1061 | 1491 | 1648 | 1644 | 1632 |
| K09021 pyridinium-3,5-bis(hydroxymethyl) acid mononucleotide nickel chelate [EC:4.99.1.12]                                 | 481  | 478  | 503  | 481  | 138  | 143  | 165  | 173  | 593  | 605  | 680  | 654  |
| K09773 [pyruvate, water dikinase]-phosphate phosphotransferase / [pyruvate, water dikinase] kinase [EC:2.7.4.28 2.7.11.33] | 1691 | 1659 | 1670 | 1703 | 1027 | 1026 | 1025 | 1059 | 1182 | 1208 | 1131 | 1132 |
| K09809 CDP-glycerol glycerophosphotransferase [EC:2.7.8.12]                                                                | 324  | 326  | 315  | 306  | 57   | 68   | 61   | 74   | 403  | 485  | 479  | 526  |
| K10231 kojibiose phosphorylase [EC:2.4.1.230]                                                                              | 357  | 395  | 400  | 382  | 90   | 81   | 66   | 76   | 229  | 260  | 270  | 251  |
| K10253 DOPA 4,5-dioxygenase [EC:1.14.99.-]                                                                                 | 629  | 646  | 563  | 607  | 344  | 363  | 337  | 322  | 183  | 174  | 180  | 179  |
| K10254 oleate hydratase [EC:4.2.1.53]                                                                                      | 1406 | 1432 | 1438 | 1490 | 284  | 357  | 339  | 264  | 1574 | 1767 | 1599 | 1642 |
| K10530 L-lactate oxidase [EC:1.1.3.2]                                                                                      | 6    | 9    | 5    | 7    | 12   | 16   | 7    | 6    | 92   | 76   | 71   | 97   |
| K10531 L-ornithine N5-monooxygenase [EC:1.14.13.195 1.14.13.196]                                                           | 1533 | 1560 | 1452 | 1460 | 848  | 810  | 731  | 833  | 483  | 478  | 412  | 456  |
| K10670 glycine/sarcosine/betaine reductase complex component A [EC:1.21.4.2 1.21.4.3 1.21.4.4]                             | 50   | 38   | 37   | 36   | 23   | 27   | 19   | 19   | 23   | 50   | 11   | 33   |
| K10671 glycine reductase complex component B subunit alpha and beta [EC:1.21.4.2]                                          | 88   | 96   | 108  | 118  | 42   | 44   | 38   | 34   | 35   | 81   | 48   | 38   |
| K10672 glycine reductase complex component B subunit gamma [EC:1.21.4.2]                                                   | 143  | 153  | 146  | 150  | 57   | 36   | 62   | 25   | 73   | 81   | 56   | 74   |
| K10677 inulin fructotransferase (DFA-4-forming) [EC:4.2.2.17]                                                              | 0    | 0    | 0    | 0    | 0    | 1    | 0    | 0    | 1    | 0    | 0    | 1    |
| K10708 fructoselysine 6-phosphate deglycase [EC:3.5.-.-]                                                                   | 292  | 371  | 319  | 353  | 366  | 394  | 379  | 378  | 139  | 132  | 122  | 122  |
| K10709 fructoselysine 3-epimerase [EC:5.1.3.41]                                                                            | 223  | 196  | 227  | 227  | 319  | 296  | 294  | 282  | 15   | 25   | 23   | 21   |
| K10710 fructoselysine 6-kinase [EC:2.7.1.218]                                                                              | 255  | 266  | 259  | 299  | 299  | 307  | 292  | 283  | 113  | 86   | 102  | 90   |
| K10819 histidine kinase [EC:2.7.13.3]                                                                                      | 7    | 2    | 5    | 12   | 5    | 7    | 10   | 9    | 2    | 1    | 1    | 0    |
| K11065 thiol peroxidase, atypical 2-Cys peroxidoredoxin [EC:1.11.1.115]                                                    | 558  | 650  | 699  | 657  | 1192 | 1159 | 1213 | 1180 | 1020 | 1136 | 1144 | 1097 |
| K11161 retinol dehydrogenase 13 [EC:1.1.1.300]                                                                             | 0    | 0    | 0    | 0    | 0    | 1    | 0    | 0    | 1    | 1    | 0    | 0    |
| K11169 dehydrogenase/reductase SDR family member 13 [EC:1.1.-.-]                                                           | 0    | 0    | 0    | 1    | 0    | 0    | 0    | 0    | 0    | 0    | 0    | 0    |
| K11206 deaminated glutathione amidase [EC:3.5.1.128]                                                                       | 2079 | 2083 | 1942 | 2014 | 1278 | 1159 | 1171 | 1176 | 1291 | 1347 | 1301 | 1204 |
| K11209 GSH-dependent disulfide-bond oxidoreductase [EC:1.8.4.-]                                                            | 2309 | 2186 | 2276 | 2329 | 1322 | 1247 | 1215 | 1210 | 1819 | 1932 | 1765 | 1850 |
| K11750 esterase FrsA [EC:3.1.-.-]                                                                                          | 685  | 748  | 678  | 752  | 574  | 593  | 532  | 520  | 989  | 1042 | 968  | 1070 |
| K11933 NADH oxidoreductase Hcr [EC:1.-.-.-]                                                                                | 574  | 563  | 536  | 576  | 420  | 375  | 421  | 381  | 794  | 806  | 751  | 746  |
| K11938 HMP-PP phosphatase [EC:3.6.1.-]                                                                                     | 548  | 526  | 522  | 608  | 397  | 430  | 452  | 392  | 791  | 864  | 807  | 843  |
| K11941 glucans biosynthesis protein C [EC:2.1.-.-]                                                                         | 524  | 530  | 557  | 555  | 386  | 444  | 415  | 361  | 845  | 772  | 759  | 828  |
| K11942 isobutyryl-CoA mutase [EC:5.4.99.13]                                                                                | 8    | 3    | 2    | 4    | 3    | 2    | 5    | 2    | 0    | 0    | 0    | 0    |
| K12136 hydrogenase-4 component A [EC:1.-.-.-]                                                                              | 141  | 150  | 125  | 141  | 163  | 213  | 209  | 202  | 4    | 13   | 4    | 15   |
| K12137 hydrogenase-4 component B [EC:1.-.-.-]                                                                              | 526  | 528  | 521  | 586  | 755  | 835  | 714  | 667  | 185  | 233  | 193  | 208  |
| K12138 hydrogenase-4 component C [EC:1.-.-.-]                                                                              | 211  | 202  | 207  | 191  | 329  | 302  | 361  | 303  | 3    | 1    | 2    | 2    |
| K12139 hydrogenase-4 component D [EC:1.-.-.-]                                                                              | 325  | 292  | 273  | 309  | 430  | 438  | 501  | 442  | 4    | 3    | 0    | 4    |
| K12140 hydrogenase-4 component E [EC:1.-.-.-]                                                                              | 139  | 120  | 146  | 165  | 162  | 223  | 182  | 175  | 39   | 37   | 50   | 51   |
| K12141 hydrogenase-4 component F [EC:1.-.-.-]                                                                              | 360  | 361  | 315  | 362  | 406  | 464  | 499  | 454  | 92   | 90   | 99   | 101  |
| K12142 hydrogenase-4 component G [EC:1.-.-.-]                                                                              | 380  | 385  | 308  | 369  | 520  | 650  | 511  | 477  | 4    | 7    | 8    | 7    |
| K12144 hydrogenase-4 component I [EC:1.-.-.-]                                                                              | 175  | 170  | 138  | 145  | 210  | 254  | 231  | 220  | 4    | 1    | 0    | 0    |
| K12145 hydrogenase-4 component J [EC:1.-.-.-]                                                                              | 90   | 97   | 67   | 87   | 130  | 157  | 115  | 112  | 1    | 0    | 0    | 1    |
| K12152 phosphatase NudJ [EC:3.6.1.-]                                                                                       | 235  | 221  | 250  | 254  | 206  | 198  | 183  | 174  | 365  | 385  | 342  | 459  |
| K12267 peptide methionine sulfoxide reductase msrA/msrB [EC:1.8.4.11 1.8.4.12]                                             | 1258 | 1155 | 1219 | 1256 | 1974 | 1920 | 1988 | 2000 | 1989 | 2016 | 2176 | 2045 |
| K12374 arylsulfatase D/F/H [EC:3.1.6.-]                                                                                    | 0    | 1    | 0    | 0    | 0    | 0    | 0    | 0    | 0    | 1    | 0    | 0    |
| K12375 arylsulfatase I/J [EC:3.1.6.-]                                                                                      | 0    | 0    | 0    | 0    | 0    | 2    | 0    | 0    | 0    | 0    | 0    | 0    |
| K12376 arylsulfatase K [EC:3.1.6.-]                                                                                        | 0    | 0    | 0    | 0    | 1    | 2    | 4    | 2    | 2    | 0    | 1    | 0    |
| K12410 NAD-dependent deacetylase [EC:3.5.1.-]                                                                              | 3727 | 3641 | 3516 | 3529 | 3251 | 3230 | 3116 | 3200 | 3085 | 3024 | 3058 | 3239 |
| K12508 feruloyl-CoA synthase [EC:6.2.1.34]                                                                                 | 0    | 3    | 0    | 3    | 0    | 0    | 0    | 2    | 0    | 0    | 0    | 0    |
| K12700 non-specific ribonucleoside hydrolase [EC:3.2.-.-]                                                                  | 621  | 690  | 580  | 594  | 396  | 469  | 464  | 424  | 797  | 927  | 829  | 878  |
| K12944 nucleoside triphosphatase [EC:3.6.1.-]                                                                              | 268  | 276  | 242  | 270  | 203  | 184  | 158  | 171  | 367  | 356  | 363  | 375  |
| K12945 GDP-mannose pyrophosphatase NudK [EC:3.6.1.-]                                                                       | 149  | 132  | 118  | 106  | 127  | 203  | 183  | 152  | 52   | 59   | 57   | 58   |
| K12950 manganese/zinc-transporting P-type ATPase C [EC:7.2.2.-]                                                            | 3    | 0    | 4    | 1    | 3    | 0    | 2    | 0    | 2    | 0    | 3    | 1    |
| K12952 cation-transporting P-type ATPase E [EC:7.2.2.-]                                                                    | 474  | 470  | 474  | 522  | 191  | 248  | 201  | 203  | 711  | 815  | 734  | 799  |
| K12953 cation-transporting P-type ATPase F [EC:7.2.2.-]                                                                    | 1    | 1    | 0    | 1    | 0    | 0    | 0    | 0    | 0    | 0    | 0    | 1    |
| K12954 cation-transporting P-type ATPase G [EC:7.2.2.-]                                                                    | 0    | 0    | 0    | 0    | 0    | 0    | 0    | 0    | 1    | 0    | 2    | 1    |
| K12957 uncharacterized zinc-type alcohol dehydrogenase-like protein [EC:1.-.-.-]                                           | 704  | 720  | 665  | 731  | 453  | 494  | 505  | 407  | 1040 | 939  | 951  | 1015 |
| K13043 N-succinyl-L-ornithine transcarbamylase [EC:2.3.1.31]                                                               | 643  | 716  | 765  | 623  | 2214 | 2179 | 2297 | 2300 | 1597 | 1503 | 1646 | 1513 |
| K13059 N-acetylhexosamine 1-kinase [EC:2.7.1.162]                                                                          | 3    | 2    | 2    | 0    | 0    | 1    | 2    | 0    | 9    | 6    | 3    | 15   |
| K13069 diguanylate cyclase [EC:2.7.7.65]                                                                                   | 583  | 610  | 559  | 540  | 373  | 454  | 425  | 460  | 875  | 868  | 928  | 1014 |
| K13243 c-di-GMP-specific phosphodiesterase [EC:3.1.4.52]                                                                   | 13   | 10   | 6    | 9    | 21   | 36   | 31   | 36   | 106  | 142  | 121  | 131  |
| K13244 c-di-GMP-specific phosphodiesterase [EC:3.1.4.52]                                                                   | 1    | 3    | 2    | 0    | 12   | 16   | 17   | 10   | 38   | 57   | 51   | 44   |
| K13252 putrescine carbamoyltransferase [EC:2.3.1.3.6]                                                                      | 32   | 23   | 20   | 36   | 13   | 11   | 8    | 15   | 40   | 50   | 60   | 42   |
| K13278 60kDa lyso-phospholipase [EC:3.1.1.5.1.1.47 3.5.1.1]                                                                | 0    | 0    | 0    | 0    | 0    | 0    | 0    | 0    | 0    | 1    | 0    | 0    |
| K13281 UV DNA damage endonuclease [EC:3.-.-.-]                                                                             | 10   | 22   | 7    | 11   | 5    | 5    | 2    | 3    | 39   | 20   | 37   | 31   |
| K13282 phosphatidylglycerol--prolipoprotein diacylglyceryl transferase [EC:2.5.1.145]                                      | 2433 | 2358 | 2257 | 2205 | 1350 | 1376 | 1290 | 1310 | 1667 | 1664 | 1780 | 1825 |
| K13574 uncharacterized oxidoreductase [EC:1.1.1.1.-]                                                                       | 845  | 843  | 818  | 982  | 828  | 892  | 858  | 810  | 971  | 932  | 957  | 950  |
| K13670 putative glycosyltransferase [EC:2.4.-.-]                                                                           | 2    | 0    | 0    | 0    | 0    | 0    | 0    | 0    | 0    | 0    | 0    | 0    |
| K13714 bifunctional autolysin [EC:3.5.1.28 3.2.1.96]                                                                       | 0    | 0    | 0    | 0    | 0    | 0    | 0    | 0    | 3    | 0    | 0    | 0    |
| K13727 phenolic acid decarboxylase [EC:4.1.1.-]                                                                            | 332  | 315  | 305  | 329  | 257  | 232  | 252  | 232  | 442  | 449  | 405  | 456  |
| K13930 triphosphoribosyl-dephospho-CoA synthase [EC:2.4.2.52]                                                              | 987  | 1034 | 843  | 958  | 652  | 680  | 577  | 608  | 726  | 777  | 743  | 769  |
| K13932 malonate decarboxylase beta subunit [EC:4.1.1.87]                                                                   | 1760 | 1736 | 1443 | 1601 | 986  | 940  | 967  | 932  | 968  | 1014 | 925  | 968  |
| K13933 malonate decarboxylase gamma subunit [EC:4.1.1.87]                                                                  | 2006 | 1959 | 1751 | 1856 | 1022 | 1142 | 1156 | 1139 | 1008 | 969  | 881  | 1052 |
| K13934 phosphoribosyl-dephospho-CoA transferase [EC:2.7.7.66]                                                              | 1238 | 1289 | 1117 | 1231 | 623  | 647  | 664  | 750  | 724  | 719  | 647  | 761  |
| K13935 malonate decarboxylase epsilon subunit [EC:2.3.1.39]                                                                | 1411 | 1301 | 1106 | 1296 | 783  | 752  | 783  | 779  | 895  | 901  | 865  | 939  |
| K13979 uncharacterized zinc-type alcohol dehydrogenase-like protein [EC:1.-.-.-]                                           | 2377 | 2393 | 2160 | 2239 | 1450 | 1561 | 1395 | 1448 | 1446 | 1495 | 1328 | 1401 |
| K14189 uncharacterized oxidoreductase [EC:1.-.-.-]                                                                         | 134  | 126  | 139  | 143  | 202  | 195  | 205  | 187  | 0    | 2    | 0    | 0    |
| K14351 arylacetamide deacetylase-like 3/4 [EC:3.1.1.-]                                                                     | 0    | 0    | 0    | 1    | 0    | 0    | 0    | 0    | 0    | 0    | 0    | 0    |
| K14587 protein SgtC [EC:5.1.3.-]                                                                                           | 1    | 2    | 0    | 0    | 5    | 1    | 1    | 4    | 3    | 6    | 3    | 1    |
| K14659 chito oligosaccharide deacetylase [EC:3.5.1.1.-]                                                                    | 1    | 0    | 0    | 0    | 0    | 0    | 0    | 0    | 0    | 0    | 0    | 0    |
| K14744 prophage endopeptidase [EC:3.4.-.-]                                                                                 | 470  | 487  | 519  | 492  | 537  | 560  | 497  | 462  | 154  | 130  | 135  | 112  |
| K15509 sulfolipid diol 3-dehydrogenase [EC:1.1.1.308]                                                                      | 2    | 2    | 0    | 1    | 0    | 0    | 0    | 0    | 8    | 6    | 1    | 5    |
| K15515 sulfoacetalddehyde dehydrogenase [EC:1.2.1.81]                                                                      | 47   | 33   | 60   | 53   | 6    | 11   | 3    | 6    | 15   | 21   | 12   | 20   |
| K15524 mannosylglycerate hydrolase [EC:3.2.1.170]                                                                          | 33   | 33   | 23   | 22   | 40   | 38   | 56   | 32   | 22   | 54   | 32   | 39   |
| K15527 cysteate synthase [EC:2.5.1.76]                                                                                     | 3    | 6    | 6    | 1    | 14   | 8    | 3    | 10   | 0    | 2    | 0    | 0    |
| K15531 oligosaccharide reducing-end xylanase [EC:3.2.1.156]                                                                | 116  | 120  | 119  | 120  | 47   | 78   | 71   | 89   | 291  | 304  | 289  | 286  |
| K15532 unsaturated rhamnogalacturonyl hydrolase [EC:3.2.1.172]                                                             | 4181 | 4169 | 4269 | 4227 | 5527 | 5703 | 5706 | 5562 | 5684 | 5877 | 5188 | 5777 |
| K15533 1,3-beta-galactosyl-N-acetylhexosamine phosphorylase [EC:2.4.1.211]                                                 | 1281 | 1343 | 1348 | 1305 | 273  | 262  | 263  | 227  | 1080 | 1238 | 1338 | 1138 |
| K15534 beta-D-galactosyl-(1->4)-L-rhamnose phosphorylase [EC:4.1.2.47]                                                     | 175  | 164  | 167  | 156  | 22   | 36   | 27   | 12   | 155  | 134  | 160  | 181  |
| K15538 glycoprotein endo-alpha-1,2-mannosidase [EC:3.2.1.130]                                                              | 0    | 0    | 1    | 2    | 3    | 2    | 3    | 1    | 0    | 1    | 1    | 0    |
| K15915 undecaprenyl phosphate N,N'-diacetyl bacillosamine 1-phosphate transferase [EC:2.7.8.36]                            | 10   | 12   | 14   | 11   | 3    | 3    | 9    | 3    | 7    | 7    | 2    | 6    |
| K15922 sulfoquinovosidase [EC:3.2.1.199]                                                                                   | 31   | 23   | 16   | 31   | 4    | 8    | 7    | 9    | 81   | 53   | 61   | 71   |
| K15924 glucuronarabinosyl endo-1,4-beta-xylanase [EC:3.2.1.136]                                                            | 0    | 0    | 2    | 0    | 0    | 0    | 0    | 3    | 0    | 2    | 0    | 0    |
| K16212 4-O-beta-D-mannosyl-D-glucose phosphorylase [EC:2.4.1.281]                                                          | 996  | 1052 | 1141 | 1055 | 2836 | 2799 | 2814 | 2735 | 2303 | 2132 | 2201 | 2223 |
| K16213 cellobiose epimerase [EC:5.1.3.11]                                                                                  | 263  | 288  | 255  | 268  | 202  | 226  | 236  | 205  | 181  | 223  | 220  | 189  |
| K16704 dTDP-4-amino-4,6-dideoxy-D-galactose acyltransferase [EC:2.3.1.210]                                                 | 449  | 425  | 412  | 505  | 294  | 351  | 294  | 309  | 559  | 582  | 576  | 587  |
| K16868 tellurite methyltransferase [EC:2.1.1.265]                                                                          | 407  | 393  | 403  | 368  | 241  | 232  | 226  | 244  | 553  | 592  | 569  | 585  |
| K16869 octanoyl-[GcvH]-protein N-octanoyltransferase [EC:2.3.1.204]                                                        | 40   | 47   | 48   | 35   | 8    | 6    | 8    | 4    | 55   | 78   | 47   | 54   |
| K16872 beta-ketodecanoyl-acyl-carrier-protein synthase [EC:2.3.1.207]                                                      | 1575 | 1648 | 1593 | 1633 | 986  | 866  | 846  | 918  | 541  | 477  | 479  | 445  |
| K17064 D-2-hydroxyacid dehydrogenase (NADP+) [EC:1.1.1.272]                                                                | 2    | 2    | 1    | 0    | 3    | 1    | 0    | 0    | 0    | 0    | 0    | 0    |
| K17424 endo-alpha-N-acetylglactosaminidase [EC:3.2.1.97]                                                                   | 190  | 246  | 235  | 237  | 45   | 30   | 27   | 31   | 193  | 265  | 224  | 272  |
| K17735 carnitine 3-dehydrogenase [EC:1.1.1.108]                                                                            | 1264 | 1286 | 1051 | 1161 | 673  | 593  | 609  | 650  | 383  | 366  | 343  | 383  |
| K17758 ADP-dependent NAD(P)H-hydrate dehydratase [EC:4.2.1.136]                                                            | 4835 | 4787 | 4670 | 4685 | 5119 | 5273 | 5251 | 5197 | 4768 | 4831 | 4810 | 4949 |
| K17759 NAD(P)H-hydrate epimerase [EC:5.1.99.6]                                                                             | 3    | 5    | 5    | 12   | 7    | 16   | 14   | 10   | 13   | 8    | 15   | 12   |
| K17760 quinoxalineprotein                                                                                                  |      |      |      |      |      |      |      |      |      |      |      |      |

|                                                                                                                   |      |      |      |      |      |      |      |      |      |      |      |      |
|-------------------------------------------------------------------------------------------------------------------|------|------|------|------|------|------|------|------|------|------|------|------|
| K18367 CoA-dependent NAD(P)H sulfur oxidoreductase [EC:1.8.1.18]                                                  | 2    | 3    | 0    | 1    | 2    | 1    | 4    | 3    | 1    | 1    | 2    | 1    |
| K18425 3-hydroxy-D-aspartate aldolase [EC:4.1.3.41]                                                               | 0    | 1    | 0    | 1    | 0    | 0    | 0    | 0    | 12   | 1    | 3    | 1    |
| K18427 4-hydroxyphenylacetate decarboxylase large subunit [EC:4.1.1.83]                                           | 75   | 76   | 56   | 58   | 0    | 0    | 0    | 0    | 127  | 141  | 136  | 128  |
| K18428 4-hydroxyphenylacetate decarboxylase small subunit [EC:4.1.1.83]                                           | 2    | 1    | 1    | 3    | 0    | 1    | 0    | 2    | 10   | 7    | 4    | 10   |
| K18446 triphosphatase [EC:3.6.1.25]                                                                               | 883  | 838  | 868  | 859  | 640  | 624  | 602  | 603  | 1147 | 1168 | 1140 | 1228 |
| K18456 8-oxoguanine deaminase [EC:3.5.4.32]                                                                       | 2422 | 2261 | 2266 | 2211 | 1384 | 1171 | 1214 | 1393 | 770  | 669  | 713  | 767  |
| K18457 L-proline amide hydrolase [EC:3.5.1.101]                                                                   | 0    | 0    | 0    | 0    | 0    | 0    | 0    | 1    | 0    | 0    | 0    | 0    |
| K18459 guanidinopropionase [EC:3.5.3.17]                                                                          | 1435 | 1475 | 1350 | 1441 | 791  | 781  | 794  | 882  | 523  | 424  | 417  | 478  |
| K18478 sulfofructose kinase [EC:2.7.1.184]                                                                        | 239  | 207  | 197  | 216  | 302  | 351  | 379  | 352  | 87   | 96   | 84   | 93   |
| K18479 sulfoquinovose isomerase [EC:5.3.1.31]                                                                     | 0    | 0    | 0    | 3    | 0    | 2    | 0    | 1    | 2    | 0    | 0    | 4    |
| K18540 (R)-amidase [EC:3.5.1.100]                                                                                 | 998  | 1001 | 945  | 1018 | 570  | 550  | 527  | 573  | 341  | 310  | 253  | 318  |
| K18561 FAD-dependent fumarate reductase [EC:1.3.8.-]                                                              | 0    | 0    | 0    | 0    | 1    | 0    | 0    | 0    | 0    | 0    | 0    | 0    |
| K18581 unsaturated chondroitin disaccharide hydrolase [EC:3.2.1.180]                                              | 4075 | 3950 | 4098 | 4085 | 4389 | 5040 | 4713 | 4714 | 4703 | 4787 | 4786 | 4757 |
| K18650 exo-poly-alpha-galacturonosidase [EC:3.2.1.82]                                                             | 3    | 2    | 3    | 2    | 19   | 16   | 13   | 13   | 0    | 0    | 1    | 2    |
| K18672 diadenylate cyclase [EC:2.7.7.85]                                                                          | 482  | 444  | 477  | 471  | 131  | 148  | 148  | 130  | 470  | 495  | 477  | 512  |
| K18673 beta-glucoside kinase [EC:2.7.1.85]                                                                        | 373  | 359  | 375  | 372  | 101  | 85   | 98   | 136  | 708  | 782  | 736  | 731  |
| K18678 phytol kinase [EC:2.7.1.182]                                                                               | 3    | 9    | 6    | 8    | 9    | 16   | 7    | 15   | 24   | 19   | 17   | 25   |
| K18700 fluoroacetyl-CoA thioesterase [EC:3.1.2.29]                                                                | 0    | 1    | 0    | 0    | 1    | 0    | 0    | 0    | 3    | 2    | 2    | 1    |
| K18702 CoA:oxalate CoA-transferase [EC:2.8.3.19]                                                                  | 19   | 12   | 16   | 17   | 36   | 40   | 40   | 25   | 73   | 95   | 102  | 79   |
| K18703 succinate--hydroxymethylglutarate CoA-transferase [EC:2.8.3.13]                                            | 0    | 1    | 1    | 1    | 1    | 2    | 1    | 3    | 0    | 0    | 1    | 1    |
| K18704 CDP-ribitol ribitolphosphotransferase / teichoic acid ribitol-phosphate polymerase [EC:2.7.8.14 2.7.8.47]  | 0    | 5    | 2    | 6    | 2    | 5    | 4    | 3    | 1    | 4    | 1    | 10   |
| K18783 nigerose phosphorylase [EC:2.4.1.279]                                                                      | 15   | 11   | 26   | 17   | 6    | 3    | 7    | 2    | 10   | 23   | 21   | 15   |
| K18785 beta-1,4-mannooligosaccharide/beta-1,4-mannosyl-N-acetylglucosamine phosphorylase [EC:2.4.1.319 2.4.1.320] | 836  | 884  | 941  | 912  | 1959 | 2064 | 2139 | 1945 | 1626 | 1590 | 1598 | 1437 |
| K18786 cellobionic acid phosphorylase [EC:2.4.1.321]                                                              | 3    | 2    | 0    | 0    | 2    | 1    | 0    | 1    | 0    | 1    | 3    | 1    |
| K18820 oligosaccharide 4-alpha-D-glucosyltransferase [EC:2.4.1.161]                                               | 0    | 0    | 0    | 1    | 0    | 0    | 0    | 0    | 0    | 0    | 0    | 0    |
| K18855 UDP-N-acetylglucosamine 3-dehydrogenase [EC:1.1.1.374]                                                     | 2    | 2    | 6    | 3    | 1    | 2    | 0    | 2    | 6    | 15   | 9    | 9    |
| K18810 D-psicose/D-tagatose/L-ribulose 3-epimerase [EC:5.1.3.30 5.1.3.31]                                         | 328  | 309  | 293  | 329  | 16   | 15   | 14   | 7    | 265  | 284  | 247  | 237  |
| K18915 ferric-chelate reductase [NAD(P)H] [EC:1.16.1.10]                                                          | 0    | 0    | 0    | 0    | 0    | 0    | 0    | 0    | 0    | 0    | 0    | 1    |
| K18916 phosphate dehydrogenase [EC:1.20.1.1]                                                                      | 365  | 315  | 290  | 326  | 506  | 506  | 471  | 483  | 57   | 55   | 65   | 54   |
| K18931 AMP phosphorylase [EC:2.4.2.57]                                                                            | 0    | 0    | 0    | 0    | 0    | 0    | 0    | 0    | 1    | 0    | 0    | 1    |
| K19049 chondroitin AC lyase [EC:4.2.2.5]                                                                          | 0    | 0    | 2    | 0    | 0    | 4    | 1    | 1    | 5    | 2    | 3    | 1    |
| K19050 heparin lyase [EC:4.2.2.7]                                                                                 | 9    | 8    | 13   | 8    | 33   | 28   | 24   | 24   | 27   | 20   | 28   | 30   |
| K19052 heparan-sulfate lyase [EC:4.2.2.8]                                                                         | 1029 | 1138 | 1205 | 1119 | 4108 | 4055 | 4208 | 3910 | 3002 | 2930 | 3086 | 2943 |
| K19068 UDP-2-acetamido-2,6-beta-L-arabino-hexul-4-ose reductase [EC:1.1.1.367]                                    | 468  | 489  | 495  | 457  | 117  | 117  | 106  | 141  | 271  | 272  | 259  | 251  |
| K19179 glycerophosphoinositol glycerophosphodiesterase [EC:3.1.4.44]                                              | 0    | 0    | 3    | 0    | 1    | 0    | 0    | 1    | 0    | 0    | 0    | 0    |
| K19181 1,5-anhydro-D-fructose reductase (1,5-anhydro-D-mannitol-forming) [EC:1.1.1.292]                           | 0    | 0    | 0    | 0    | 0    | 0    | 4    | 2    | 0    | 4    | 5    | 0    |
| K19245 sulfonate dioxygenase [EC:1.14.11.-]                                                                       | 0    | 0    | 2    | 0    | 0    | 0    | 0    | 0    | 0    | 0    | 0    | 0    |
| K19265 L-glyceraldehyde 3-phosphate reductase [EC:1.1.1.1-]                                                       | 2247 | 2265 | 2198 | 2288 | 3333 | 3411 | 3333 | 3393 | 3030 | 2946 | 3251 | 3143 |
| K19270 sugar-phosphatase [EC:3.1.3.23]                                                                            | 764  | 736  | 758  | 750  | 543  | 492  | 537  | 511  | 967  | 996  | 985  | 1079 |
| K19356 lytic cellulose monooxygenase (C1-hydroxylating) [EC:1.14.99.54]                                           | 0    | 0    | 0    | 0    | 0    | 0    | 0    | 0    | 0    | 0    | 0    | 1    |
| K19386 NADH kinase [EC:2.7.1.86]                                                                                  | 0    | 0    | 0    | 0    | 0    | 0    | 0    | 0    | 0    | 0    | 0    | 1    |
| K19405 protein arginine kinase [EC:2.7.14.1]                                                                      | 374  | 413  | 458  | 393  | 93   | 103  | 76   | 63   | 265  | 295  | 275  | 273  |
| K19422 glycosyltransferase EpsD [EC:2.4.-.-]                                                                      | 8    | 15   | 6    | 11   | 41   | 27   | 31   | 30   | 14   | 20   | 6    | 13   |
| K19426 pyruvyl transferase EpsI [EC:2.-.-]                                                                        | 0    | 0    | 0    | 0    | 0    | 0    | 0    | 1    | 0    | 0    | 0    | 0    |
| K19427 glycosyltransferase EpsJ [EC:2.4.-.-]                                                                      | 67   | 69   | 58   | 67   | 44   | 34   | 40   | 34   | 86   | 116  | 87   | 85   |
| K19428 sugar transferase EpsL [EC:2.-.-]                                                                          | 28   | 30   | 26   | 37   | 5    | 8    | 10   | 5    | 14   | 21   | 11   | 18   |
| K19429 acetyltransferase EpsM [EC:2.3.1.-]                                                                        | 93   | 77   | 98   | 68   | 90   | 88   | 70   | 82   | 9    | 11   | 26   | 25   |
| K19430 pyridoxal phosphate-dependent aminotransferase EpsN [EC:2.6.1.-]                                           | 6    | 2    | 3    | 3    | 1    | 1    | 3    | 2    | 3    | 2    | 4    | 1    |
| K19431 pyruvyl transferase EpsO [EC:2.-.-]                                                                        | 17   | 18   | 14   | 11   | 3    | 2    | 3    | 1    | 0    | 0    | 3    | 0    |
| K19597 Au+-exporting ATPase [EC:3.6.1.-]                                                                          | 0    | 0    | 0    | 0    | 0    | 0    | 0    | 2    | 0    | 0    | 0    | 0    |
| K19711 L-serine 3-dehydrogenase (NAD+) [EC:1.1.1.387]                                                             | 1331 | 1218 | 1237 | 1220 | 647  | 638  | 668  | 784  | 447  | 349  | 424  | 411  |
| K19713 thiosulfate dehydrogenase [EC:1.8.2.2]                                                                     | 4279 | 4310 | 3943 | 4238 | 2287 | 2265 | 2103 | 2299 | 1317 | 1244 | 1268 | 1299 |
| K19802 L-Ala-D/L-Glu epimerase [EC:5.1.1.20]                                                                      | 1838 | 1821 | 1871 | 1845 | 2858 | 3037 | 2860 | 2800 | 2730 | 2870 | 2637 | 2666 |
| K19814 glutamate 2,3-aminomutase [EC:5.4.3.9]                                                                     | 0    | 2    | 0    | 1    | 0    | 0    | 0    | 0    | 0    | 1    | 0    | 1    |
| K19817 coenzyme F420H2 oxidase [EC:1.5.3.22]                                                                      | 0    | 2    | 0    | 3    | 5    | 1    | 3    | 3    | 13   | 19   | 19   | 17   |
| K19954 alcohol dehydrogenase [EC:1.1.1.1-]                                                                        | 25   | 27   | 23   | 28   | 6    | 6    | 4    | 7    | 16   | 11   | 24   | 15   |
| K19955 alcohol dehydrogenase [EC:1.1.1.1-]                                                                        | 1095 | 1015 | 1041 | 1089 | 309  | 343  | 401  | 283  | 1282 | 1228 | 1274 | 1215 |
| K19967 D-threonine aldolase [EC:4.1.2.42]                                                                         | 0    | 0    | 0    | 0    | 0    | 0    | 0    | 0    | 1    | 1    | 1    | 2    |
| K19997 GlcNAc-P-P-Und epimerase [EC:5.1.3.26]                                                                     | 119  | 88   | 125  | 108  | 140  | 150  | 132  | 151  | 9    | 14   | 12   | 9    |
| K20025 (R)-2-hydroxyisocaproyl-CoA dehydratase alpha subunit [EC:4.2.1.157]                                       | 30   | 18   | 19   | 18   | 0    | 0    | 0    | 0    | 6    | 7    | 6    | 8    |
| K20026 (R)-2-hydroxyisocaproyl-CoA dehydratase beta subunit [EC:4.2.1.157]                                        | 16   | 17   | 8    | 15   | 8    | 15   | 10   | 16   | 5    | 7    | 4    | 5    |
| K20037 choline trimethylamine-lyase activating enzyme [EC:1.97.1.-]                                               | 310  | 303  | 308  | 310  | 74   | 61   | 66   | 69   | 173  | 214  | 201  | 195  |
| K20038 choline trimethylamine-lyase [EC:4.3.99.4]                                                                 | 970  | 829  | 896  | 885  | 319  | 331  | 312  | 299  | 600  | 627  | 677  | 633  |
| K20141 2-oxoglutarate carboxylase small subunit [EC:6.4.1.7]                                                      | 1    | 0    | 0    | 0    | 0    | 0    | 0    | 1    | 0    | 0    | 0    | 0    |
| K20201 protein arginine phosphatase [EC:3.9.1.2]                                                                  | 2    | 0    | 1    | 3    | 1    | 0    | 0    | 0    | 1    | 0    | 4    | 1    |
| K20202 sulfide dehydrogenase subunit alpha [EC:1.8.1.19]                                                          | 1    | 1    | 1    | 1    | 5    | 2    | 3    | 3    | 3    | 3    | 3    | 2    |
| K20203 sulfide dehydrogenase subunit beta [EC:1.8.1.19]                                                           | 0    | 0    | 0    | 0    | 0    | 0    | 0    | 0    | 0    | 0    | 0    | 1    |
| K20215 diphthine synthase [EC:2.1.1.98]                                                                           | 3    | 0    | 2    | 0    | 0    | 2    | 0    | 3    | 5    | 3    | 3    | 9    |
| K20238 sphingolipid C9-methyltransferase [EC:2.1.1.317]                                                           | 1    | 0    | 0    | 0    | 0    | 0    | 0    | 0    | 0    | 0    | 0    | 0    |
| K20415 ACP-SH:acetate ligase [EC:6.2.1.35]                                                                        | 135  | 150  | 139  | 145  | 0    | 0    | 0    | 2    | 46   | 57   | 48   | 53   |
| K20429 dTDP-4-amino-4,6-dideoxy-D-glucose transaminase [EC:2.6.1.33]                                              | 0    | 0    | 0    | 1    | 0    | 0    | 0    | 0    | 0    | 0    | 0    | 0    |
| K20525 oligo-alginate lyase [EC:4.2.2.26]                                                                         | 2    | 1    | 2    | 1    | 2    | 1    | 2    | 3    | 1    | 1    | 1    | 1    |
| K20542 endoglucanase [EC:3.2.1.4]                                                                                 | 1658 | 1639 | 1503 | 1619 | 1401 | 1366 | 1349 | 1361 | 1882 | 1905 | 1827 | 1965 |
| K20548 3,6-anhydro-alpha-L-galactose dehydrogenase [EC:1.2.1.92]                                                  | 0    | 0    | 0    | 0    | 0    | 0    | 0    | 0    | 0    | 0    | 1    | 0    |
| K20549 3,6-anhydro-L-galactonate cycloisomerase [EC:5.5.1.25]                                                     | 0    | 1    | 0    | 0    | 1    | 0    | 0    | 1    | 0    | 0    | 2    | 0    |
| K20757 threo-3-hydroxy-D-aspartate ammonia-lyase [EC:4.3.1.27]                                                    | 0    | 0    | 0    | 0    | 0    | 0    | 0    | 0    | 0    | 1    | 0    | 1    |
| K20817 N-acyl-D-aspartate deacylase [EC:3.5.1.83]                                                                 | 0    | 0    | 1    | 0    | 0    | 0    | 0    | 0    | 1    | 0    | 0    | 0    |
| K20848 fructan beta-(2,1)-fructosidase [EC:3.2.1.153]                                                             | 0    | 0    | 0    | 0    | 0    | 0    | 0    | 0    | 1    | 0    | 0    | 1    |
| K20882 (R)-2-hydroxy-4-methylpentanoate CoA-transferase [EC:2.8.3.24]                                             | 15   | 12   | 17   | 29   | 3    | 9    | 12   | 11   | 45   | 36   | 40   | 48   |
| K20883 alpha-1,2-collitosyltransferase [EC:2.4.1.341]                                                             | 0    | 4    | 2    | 1    | 4    | 2    | 0    | 3    | 0    | 0    | 0    | 1    |
| K20885 beta-1,2-mannobiose phosphorylase / 1,2-beta-oligomannan phosphorylase [EC:2.4.1.339 2.4.1.340]            | 434  | 470  | 475  | 473  | 1860 | 1711 | 1771 | 1767 | 1243 | 1209 | 1280 | 1280 |
| K29002 D-erythrulose 4-kinase [EC:2.7.1.210]                                                                      | 2    | 0    | 0    | 2    | 3    | 0    | 0    | 2    | 14   | 17   | 16   | 17   |
| K29093 (R)-2-hydroxyglutaryl-CoA dehydratase subunit alpha [EC:4.2.1.167]                                         | 34   | 32   | 40   | 34   | 62   | 76   | 56   | 55   | 19   | 44   | 34   | 26   |
| K29094 (R)-2-hydroxyglutaryl-CoA dehydratase subunit beta [EC:4.2.1.167]                                          | 20   | 26   | 18   | 23   | 58   | 59   | 40   | 33   | 13   | 30   | 24   | 23   |
| K29097 L-butanol dehydrogenase (quinone) [EC:1.1.5.11]                                                            | 1    | 0    | 2    | 0    | 0    | 1    | 0    | 0    | 0    | 0    | 0    | 0    |
| K29098 long-chain alkane monooxygenase [EC:1.14.14.28]                                                            | 2111 | 2125 | 1864 | 2073 | 981  | 978  | 819  | 918  | 1628 | 1667 | 1558 | 1693 |
| K21054 D-erythritol 1-phosphate dehydrogenase [EC:1.1.1.402]                                                      | 0    | 0    | 0    | 0    | 0    | 0    | 2    | 0    | 0    | 1    | 2    | 2    |
| K21055 3-deoxy-D-glycero-D-galacto-nononate 9-phosphatase [EC:3.1.3.103]                                          | 0    | 2    | 0    | 0    | 0    | 0    | 0    | 2    | 0    | 2    | 0    | 0    |
| K21065 beta-1,2-mannosidase [EC:3.2.1.197]                                                                        | 1849 | 1943 | 2090 | 1816 | 7206 | 6993 | 7155 | 6757 | 5423 | 5253 | 5241 | 4939 |
| K21132 alpha-mannan endo-1,2-alpha-mannanase / glycoprotein endo-alpha-1,2-mannosidase [EC:3.2.1.198 3.2.1.130]   | 1    | 2    | 1    | 3    | 3    | 5    | 7    | 3    | 0    | 0    | 3    | 1    |
| K21279 3-deoxy-D-glycero-D-galacto-nononate 9-phosphate synthase [EC:2.5.1.132]                                   | 1    | 0    | 0    | 0    | 2    | 0    | 0    | 0    | 0    | 0    | 0    | 0    |
| K21285 teichoic acid glycerol-phosphate primase [EC:2.7.8.44]                                                     | 1    | 2    | 0    | 1    | 0    | 1    | 0    | 0    | 0    | 0    | 0    | 0    |
| K21298 1,2-beta-oligoglucan phosphorylase [EC:2.4.1.333]                                                          | 171  | 189  | 181  | 189  | 33   | 16   | 45   | 31   | 143  | 158  | 135  | 128  |
| K21350 sucrose 6(F)-phosphate phosphorylase [EC:2.4.1.329]                                                        | 2    | 0    | 0    | 3    | 0    | 0    | 1    | 0    | 5    | 5    | 8    | 17   |
| K21351 sucrose:sucrose fructosyltransferase [EC:2.4.1.99]                                                         | 0    | 0    | 0    | 0    | 0    | 0    | 0    | 1    | 0    | 0    | 0    | 0    |
| K21355 1,2-alpha-glucosylglycerol phosphorylase [EC:2.4.1.332]                                                    | 9    | 20   | 14   | 13   | 0    | 0    | 0    | 0    | 4    | 9    | 8    | 8    |
| K21399 2-amino-4-ketopentanoate thiolase alpha subunit [EC:2.3.1.263]                                             | 1    | 0    | 2    | 0    | 0    | 0    | 0    | 0    | 0    | 0    | 1    | 0    |
| K21400 2-amino-4-ketopentanoate thiolase beta subunit [EC:2.3.1.263]                                              | 2    | 2    | 0    | 3    | 2    | 2    | 1    | 0    | 5    | 0    | 2    | 4    |
| K21416 acetoin:2,6-dichlorophenolindophenol oxidoreductase subunit alpha [EC:1.1.1.1-]                            | 1743 | 1772 | 1547 | 1733 | 841  | 809  | 868  | 885  | 1267 | 1199 | 1108 | 1233 |
| K21417 acetoin:2,6-dichlorophenolindophenol oxidoreductase subunit beta [EC:1.1.1.1-]                             | 1971 | 1961 | 1848 | 2024 | 1099 | 1025 | 956  | 1098 | 1342 | 1433 | 1286 | 1388 |
| K21420 leucyl-tRNA--protein transferase [EC:2.3.2.29]                                                             | 958  | 973  | 953  | 997  | 486  | 489  | 501  | 515  | 309  | 297  | 285  | 260  |
| K21430 aldose sugar dehydrogenase [EC:1.1.5.-]                                                                    | 2312 | 2431 | 2248 | 2329 | 1314 | 1253 | 1365 | 1341 | 1382 | 1308 | 1327 | 1522 |
| K2148                                                                                                             |      |      |      |      |      |      |      |      |      |      |      |      |

|                                                                                                                 |       |       |       |       |       |       |       |       |       |       |       |       |
|-----------------------------------------------------------------------------------------------------------------|-------|-------|-------|-------|-------|-------|-------|-------|-------|-------|-------|-------|
| K21910 L-erythrulose 1-phosphate isomerase [EC:5.3.1.33]                                                        | 14    | 23    | 17    | 16    | 1     | 5     | 4     | 2     | 6     | 10    | 11    | 3     |
| K21911 D-erythrulose 4-phosphate isomerase [EC:5.3.1.34]                                                        | 1     | 0     | 0     | 0     | 0     | 0     | 0     | 2     | 1     | 1     | 4     | 1     |
| K21935 beta-lysine N6-acetyltransferase [EC:2.3.1.264]                                                          | 0     | 3     | 0     | 0     | 0     | 0     | 0     | 0     | 0     | 0     | 1     | 3     |
| K21936 anaerobin synthase [EC:2.1.1.342]                                                                        | 124   | 118   | 121   | 143   | 75    | 91    | 85    | 95    | 272   | 232   | 225   | 278   |
| K21948 3-dehydrotetronate 4-kinase [EC:2.7.1.217]                                                               | 586   | 476   | 494   | 531   | 113   | 113   | 141   | 125   | 1019  | 999   | 1008  | 1070  |
| K22015 formate dehydrogenase (acceptor) [EC:1.17.99.7]                                                          | 2567  | 2482  | 2373  | 2812  | 1900  | 1930  | 1858  | 1796  | 3643  | 3605  | 3464  | 3741  |
| K22024 4-phospho-D-threonate 3-dehydrogenase / 4-phospho-D-erythronate 3-dehydrogenase [EC:1.1.1.408 1.1.1.409] | 2366  | 2228  | 2299  | 2442  | 969   | 1135  | 1081  | 954   | 2452  | 2680  | 2449  | 2569  |
| K22025 D-erythronate 2-dehydrogenase [EC:1.1.1.410]                                                             | 0     | 0     | 0     | 0     | 0     | 0     | 0     | 0     | 0     | 3     | 3     | 4     |
| K22027 indole-3-acetate monoxygenase [EC:1.14.13.235]                                                           | 2     | 0     | 0     | 3     | 0     | 0     | 0     | 0     | 0     | 0     | 0     | 0     |
| K22078 protein-glucosylgalactosylhydrolase [EC:3.2.1.107]                                                       | 3     | 5     | 10    | 4     | 21    | 16    | 20    | 11    | 10    | 8     | 8     | 4     |
| K22129 D-threonate/D-erythronate kinase [EC:2.7.1.219 2.7.1.220]                                                | 2485  | 2773  | 2557  | 2700  | 1411  | 1377  | 1439  | 1418  | 2868  | 2997  | 2876  | 2961  |
| K22130 3-dehydro-4-phosphotetronate decarboxylase [EC:4.1.1.104]                                                | 87    | 65    | 62    | 76    | 20    | 20    | 12    | 23    | 126   | 141   | 97    | 110   |
| K22131 2-dehydrotetronate isomerase [EC:5.3.1.35]                                                               | 1647  | 1570  | 1483  | 1623  | 792   | 790   | 745   | 878   | 927   | 996   | 925   | 988   |
| K22209 D(-)-tartrate dehydratase [EC:4.2.1.81]                                                                  | 1216  | 1172  | 1118  | 1222  | 661   | 691   | 596   | 666   | 386   | 399   | 372   | 390   |
| K22213 6-methylsalicylate decarboxylase [EC:4.1.1.52]                                                           | 3     | 4     | 0     | 1     | 0     | 0     | 0     | 0     | 0     | 0     | 0     | 0     |
| K22247 polysialic-acid O-acetyltransferase [EC:2.3.1.136]                                                       | 2     | 1     | 0     | 1     | 0     | 0     | 0     | 2     | 9     | 16    | 13    | 12    |
| K22250 poly(3-hydroxyoctanoate) depolymerase [EC:3.1.1.76]                                                      | 1413  | 1314  | 1315  | 1364  | 768   | 727   | 766   | 834   | 428   | 437   | 423   | 428   |
| K22278 peptidoglycan-N-acetylglucosamine deacetylase [EC:3.5.1.104]                                             | 885   | 742   | 835   | 823   | 238   | 200   | 188   | 162   | 607   | 727   | 739   | 692   |
| K22303 alpha-ketoglutarate-dependent sulfate ester dioxygenase [EC:1.14.11.-]                                   | 1557  | 1533  | 1458  | 1545  | 994   | 1019  | 927   | 1031  | 488   | 387   | 418   | 417   |
| K22306 glucosyl-3-phosphoglycerate phosphatase [EC:3.1.3.85]                                                    | 3     | 5     | 2     | 0     | 0     | 2     | 1     | 2     | 2     | 4     | 3     | 6     |
| K22310 L-ornithine Nalpha-acyltransferase [EC:2.3.2.30]                                                         | 0     | 0     | 0     | 0     | 0     | 0     | 1     | 0     | 0     | 4     | 2     | 0     |
| K22338 formate dehydrogenase (NAD+, ferredoxin) subunit A [EC:1.17.1.11]                                        | 0     | 9     | 10    | 0     | 3     | 0     | 0     | 0     | 0     | 0     | 12    | 0     |
| K22339 formate dehydrogenase (NAD+, ferredoxin) subunit B [EC:1.17.1.11]                                        | 2     | 1     | 2     | 1     | 2     | 1     | 3     | 0     | 0     | 2     | 4     | 2     |
| K22340 formate dehydrogenase (NAD+, ferredoxin) subunit C [EC:1.17.1.11]                                        | 0     | 0     | 1     | 1     | 1     | 4     | 1     | 0     | 4     | 2     | 0     | 3     |
| K22341 formate dehydrogenase (NAD+, ferredoxin) subunit [EC:1.17.1.11]                                          | 3     | 1     | 4     | 3     | 6     | 2     | 6     | 5     | 4     | 8     | 4     | 9     |
| K22342 dimethylamine monoxygenase subunit A [EC:1.14.13.238]                                                    | 0     | 0     | 0     | 0     | 1     | 0     | 0     | 0     | 0     | 0     | 0     | 0     |
| K22343 dimethylamine monoxygenase subunit B [EC:1.14.13.238]                                                    | 2     | 2     | 0     | 0     | 0     | 0     | 0     | 1     | 0     | 0     | 0     | 0     |
| K22344 dimethylamine monoxygenase subunit C [EC:1.14.13.238]                                                    | 3     | 0     | 1     | 0     | 0     | 0     | 0     | 0     | 0     | 0     | 0     | 0     |
| K22348 manganese oxidase [EC:1.16.3.3]                                                                          | 107   | 134   | 116   | 104   | 14    | 6     | 13    | 12    | 218   | 221   | 206   | 181   |
| K22349 manganese oxidase [EC:1.16.3.3]                                                                          | 3     | 0     | 3     | 13    | 0     | 0     | 0     | 0     | 0     | 0     | 0     | 0     |
| K22405 NADH oxidase (H2O-forming) [EC:1.6.3.4]                                                                  | 251   | 254   | 250   | 231   | 30    | 29    | 31    | 28    | 332   | 317   | 327   | 396   |
| K22409 N-acetylmuramoyl-L-alanine amidase [EC:3.5.1.28]                                                         | 0     | 0     | 0     | 0     | 0     | 0     | 0     | 0     | 0     | 0     | 0     | 1     |
| K22430 caffeyl-CoA reductase-Etf complex subunit CarC [EC:1.3.1.108]                                            | 41    | 38    | 36    | 38    | 0     | 2     | 2     | 1     | 24    | 16    | 15    | 21    |
| K22431 caffeyl-CoA reductase-Etf complex subunit CarD [EC:1.3.1.108]                                            | 60    | 63    | 36    | 58    | 4     | 1     | 8     | 3     | 34    | 22    | 19    | 28    |
| K22432 caffeyl-CoA reductase-Etf complex subunit CarE [EC:1.3.1.108]                                            | 547   | 504   | 554   | 557   | 115   | 124   | 116   | 91    | 331   | 406   | 299   | 294   |
| K22438 trans-aconitate 3-methyltransferase [EC:2.1.1.145]                                                       | 0     | 0     | 0     | 0     | 0     | 0     | 0     | 0     | 0     | 1     | 0     | 1     |
| K22441 diamine N-acetyltransferase [EC:2.3.1.57]                                                                | 225   | 182   | 188   | 186   | 61    | 66    | 88    | 65    | 440   | 463   | 440   | 453   |
| K22443 carnitine monoxygenase subunit [EC:1.14.13.239]                                                          | 441   | 392   | 430   | 467   | 131   | 141   | 91    | 89    | 757   | 877   | 851   | 952   |
| K22444 carnitine monoxygenase subunit [EC:1.14.13.239]                                                          | 342   | 357   | 310   | 368   | 99    | 103   | 90    | 88    | 724   | 717   | 700   | 763   |
| K22452 protein-glutamine gamma-glutamyltransferase [EC:2.3.2.13]                                                | 2555  | 2479  | 2331  | 2436  | 1367  | 1238  | 1219  | 1351  | 772   | 723   | 640   | 727   |
| K22465 5-hydroxybenzimidazole synthase [EC:4.1.99.23]                                                           | 33    | 15    | 26    | 31    | 51    | 54    | 50    | 33    | 78    | 63    | 76    | 93    |
| K22551 N-methyl-L-proline demethylase [EC:1.5.3.-]                                                              | 0     | 0     | 0     | 0     | 0     | 0     | 1     | 0     | 1     | 0     | 1     | 1     |
| K22579 rifampicin phosphotransferase [EC:2.7.9.6]                                                               | 74    | 64    | 72    | 80    | 17    | 12    | 20    | 10    | 36    | 51    | 44    | 52    |
| K22589 threo-3-hydroxy-L-aspartate ammonia-lyase [EC:4.3.1.16]                                                  | 1546  | 1492  | 1398  | 1419  | 733   | 774   | 671   | 816   | 466   | 401   | 456   | 493   |
| K22597 glucosylglycerate phosphorylase [EC:2.4.1.352]                                                           | 280   | 231   | 243   | 227   | 90    | 54    | 104   | 76    | 224   | 226   | 197   | 218   |
| K22616 ornithine lipid ester-linked acyl 2-hydroxylase [EC:1.14.11.58]                                          | 3     | 0     | 0     | 0     | 2     | 0     | 0     | 3     | 2     | 2     | 3     | 1     |
| K22617 lyso-ornithine lipid O-acyltransferase [EC:2.3.1.1270]                                                   | 1232  | 1225  | 1100  | 1147  | 626   | 644   | 519   | 707   | 407   | 332   | 340   | 314   |
| K22704 hopanoid C-3 methylase [EC:2.1.1.-]                                                                      | 4     | 11    | 9     | 9     | 3     | 0     | 3     | 8     | 12    | 9     | 10    | 9     |
| K22721 inositol phosphorylceramide mannosyltransferase catalytic subunit [EC:2.4.1.-]                           | 1     | 0     | 0     | 0     | 0     | 1     | 0     | 0     | 0     | 0     | 0     | 0     |
| K22757 glutaminyl-peptide cyclotransferase [EC:2.3.2.5]                                                         | 6     | 2     | 2     | 5     | 6     | 0     | 3     | 4     | 2     | 0     | 0     | 1     |
| K22837 SAMP-activating enzyme [EC:2.7.7.100]                                                                    | 1     | 0     | 0     | 1     | 0     | 1     | 1     | 1     | 1     | 1     | 0     | 0     |
| K22874 L-tyrosine isonitrile desaturase/decarboxylase [EC:1.14.20.9 1.14.20.10]                                 | 1210  | 1114  | 991   | 1065  | 569   | 529   | 489   | 630   | 324   | 298   | 351   | 346   |
| K22906 phloretin hydrolase [EC:3.7.1.4]                                                                         | 7     | 7     | 11    | 7     | 0     | 0     | 3     | 2     | 11    | 6     | 7     | 8     |
| K22927 cyclic-di-AMP phosphodiesterase [EC:3.1.4.59]                                                            | 1506  | 1463  | 1428  | 1521  | 424   | 439   | 463   | 380   | 1292  | 1346  | 1280  | 1312  |
| K22952 L-tyrosine isonitrile synthase [EC:4.1.99.24]                                                            | 1014  | 954   | 870   | 963   | 472   | 449   | 443   | 550   | 275   | 275   | 248   | 281   |
| K23078 menaquinone C8-methyltransferase [EC:2.1.1.350]                                                          | 98    | 86    | 129   | 104   | 168   | 145   | 167   | 139   | 158   | 151   | 139   | 162   |
| K23107 1-deoxyxylulose-5-phosphate synthase [EC:1.1.1.-]                                                        | 1120  | 1163  | 1062  | 1238  | 532   | 645   | 647   | 563   | 1736  | 1869  | 1761  | 1775  |
| K23110 (R)-phenylacetyl-CoA dehydratase alpha subunit [EC:4.2.1.-]                                              | 12    | 4     | 3     | 5     | 0     | 0     | 0     | 0     | 1     | 3     | 3     | 3     |
| K23111 (R)-phenylacetyl-CoA dehydratase beta subunit [EC:4.2.1.-]                                               | 3     | 2     | 1     | 1     | 0     | 0     | 0     | 0     | 0     | 0     | 0     | 0     |
| K23122 staphylopine dehydrogenase [EC:1.5.1.52]                                                                 | 1     | 0     | 0     | 0     | 0     | 0     | 0     | 0     | 0     | 0     | 0     | 0     |
| K23147 aminimidazole riboside kinase [EC:2.7.1.223]                                                             | 14    | 18    | 17    | 15    | 0     | 0     | 0     | 0     | 7     | 14    | 6     | 8     |
| K23148 cytidine diphosphoramidate kinase [EC:2.7.1.224]                                                         | 0     | 0     | 0     | 0     | 2     | 0     | 3     | 3     | 5     | 0     | 3     | 4     |
| K23149 5-phospho-D-xylo-1,4-lactonase [EC:3.1.1.104]                                                            | 721   | 538   | 637   | 595   | 51    | 55    | 40    | 40    | 413   | 406   | 411   | 404   |
| K23244 D-apiose dehydrogenase [EC:1.1.1.-]                                                                      | 0     | 0     | 0     | 1     | 0     | 2     | 2     | 1     | 4     | 3     | 1     | 4     |
| K23245 D-apionate oxidoisomerase [EC:1.1.1.-]                                                                   | 49    | 35    | 37    | 27    | 7     | 7     | 5     | 2     | 78    | 90    | 84    | 71    |
| K23246 D-apionate lactonase [EC:3.1.1.-]                                                                        | 2     | 0     | 0     | 0     | 0     | 3     | 5     | 2     | 4     | 5     | 4     | 3     |
| K23247 3-oxo-isopionate kinase [EC:2.7.1.-]                                                                     | 0     | 2     | 0     | 0     | 2     | 5     | 3     | 0     | 2     | 4     | 8     | 0     |
| K23248 3-oxo-isopionate decarboxylase [EC:4.1.1.-]                                                              | 0     | 0     | 0     | 0     | 0     | 0     | 0     | 0     | 2     | 0     | 1     | 0     |
| K23254 P-type Ag+ transporter [EC:7.2.2.15]                                                                     | 1406  | 1455  | 1422  | 1368  | 2061  | 2280  | 2102  | 2054  | 136   | 151   | 132   | 139   |
| K23256 NADPH-dependent curcumin reductase [EC:1.3.1.-]                                                          | 2926  | 2835  | 2619  | 2773  | 1537  | 1548  | 1491  | 1730  | 1431  | 1375  | 1420  | 1417  |
| K23271 erythritol/L-threitol dehydrogenase [EC:1.1.1.-]                                                         | 284   | 317   | 294   | 287   | 65    | 67    | 57    | 56    | 423   | 453   | 443   | 460   |
| K23300 menaquinone reductase, multitheme cytochrome c subunit [EC:1.97.-]                                       | 6     | 4     | 4     | 1     | 0     | 2     | 3     | 0     | 2     | 1     | 2     | 0     |
| K23301 menaquinone reductase, iron-sulfur cluster-binding subunit [EC:1.97.-]                                   | 3     | 5     | 6     | 6     | 0     | 0     | 0     | 2     | 0     | 2     | 2     | 1     |
| K23463 (Z)-2-[(N-methylformamido)methylene]-5-hydroxybutyrolactone dehydrogenase [EC:1.2.1.-]                   | 0     | 0     | 0     | 0     | 0     | 0     | 0     | 0     | 1     | 0     | 1     | 0     |
| K23518 O-acetyl-ADP-ribose deacetylase [EC:3.1.1.106]                                                           | 1245  | 1351  | 1195  | 1330  | 787   | 816   | 851   | 777   | 871   | 771   | 839   | 835   |
| ko99981 Carbohydrate metabolism                                                                                 | 11010 | 11083 | 10880 | 11239 | 10813 | 10748 | 10565 | 10942 | 10698 | 10732 | 10570 | 11169 |
| K00782 L-lactate dehydrogenase complex protein LldG                                                             | 497   | 610   | 628   | 646   | 1531  | 1552  | 1497  | 1447  | 1043  | 934   | 1018  | 949   |
| K02566 NapD protein                                                                                             | 566   | 628   | 507   | 599   | 359   | 382   | 296   | 316   | 720   | 699   | 708   | 826   |
| K04767 acetoin utilization protein AcuB                                                                         | 35    | 31    | 37    | 27    | 3     | 4     | 8     | 10    | 64    | 56    | 67    | 52    |
| K06206 sugar fermentation stimulation protein A                                                                 | 1827  | 1807  | 1709  | 1809  | 894   | 908   | 888   | 922   | 1329  | 1388  | 1331  | 1447  |
| K06605 myo-inositol catabolism protein IoiH                                                                     | 425   | 414   | 357   | 401   | 105   | 83    | 93    | 93    | 710   | 779   | 770   | 823   |
| K11184 catabolite repression HPr-like protein                                                                   | 71    | 80    | 82    | 82    | 19    | 15    | 13    | 30    | 82    | 72    | 77    | 77    |
| K11930 periplasmic protein TorT                                                                                 | 3     | 5     | 1     | 7     | 14    | 5     | 15    | 8     | 58    | 59    | 44    | 43    |
| K17641 beta-xylosidase                                                                                          | 0     | 0     | 0     | 0     | 0     | 0     | 0     | 0     | 0     | 1     | 0     | 0     |
| K18928 L-lactate dehydrogenase complex protein LldE                                                             | 633   | 646   | 727   | 714   | 1774  | 1785  | 1858  | 1781  | 1144  | 1196  | 1229  | 1207  |
| K18929 L-lactate dehydrogenase complex protein LldF                                                             | 1218  | 1283  | 1415  | 1334  | 3268  | 3389  | 3335  | 3391  | 2271  | 2088  | 2229  | 2231  |
| K18930 D-lactate dehydrogenase                                                                                  | 4663  | 4520  | 4436  | 4560  | 2455  | 2246  | 2166  | 2554  | 1450  | 1448  | 1307  | 1498  |
| K19504 glucoselysine-6-phosphate deglycase                                                                      | 534   | 561   | 509   | 528   | 149   | 170   | 164   | 150   | 975   | 996   | 915   | 1101  |
| K19510 fructoselysine-6-phosphate deglycase                                                                     | 535   | 490   | 468   | 532   | 236   | 189   | 216   | 221   | 805   | 967   | 812   | 861   |
| K22111 9-O-acetyl-N-acetylneuraminic acid deacetylase                                                           | 3     | 6     | 1     | 0     | 6     | 17    | 16    | 19    | 46    | 48    | 63    | 54    |
| K22136 bacillithiol synthase                                                                                    | 0     | 2     | 2     | 0     | 0     | 2     | 0     | 0     | 1     | 1     | 0     | 0     |
| K22216 dehydratase IivD1                                                                                        | 0     | 0     | 1     | 0     | 0     | 1     | 0     | 0     | 0     | 0     | 0     | 0     |
| ko99982 Energy metabolism                                                                                       | 32087 | 31907 | 30917 | 31470 | 25007 | 25227 | 24480 | 25537 | 26157 | 26545 | 25641 | 26431 |
| K00183 prokaryotic molybdopterin-containing oxidoreductase family, molybdopterin binding subunit                | 47    | 54    | 51    | 64    | 45    | 27    | 43    | 30    | 111   | 157   | 151   | 146   |
| K00184 prokaryotic molybdopterin-containing oxidoreductase family, iron-sulfur binding subunit                  | 54    | 44    | 41    | 24    | 41    | 25    | 22    | 23    | 90    | 118   | 77    | 82    |
| K00185 prokaryotic molybdopterin-containing oxidoreductase family, membrane subunit                             | 46    | 55    | 44    | 37    | 24    | 23    | 33    | 30    | 81    | 106   | 91    | 86    |
| K02164 nitric oxide reductase NorE protein                                                                      | 956   | 849   | 809   | 873   | 508   | 497   | 459   | 520   | 343   | 281   | 294   | 275   |
| K02379 FdhD protein                                                                                             | 2163  | 2000  | 2080  | 2116  | 1271  | 1285  | 1243  | 1360  | 1223  | 1312  | 1297  | 1304  |
| K02381 FdrA protein                                                                                             | 49    | 51    | 51    | 41    | 45    | 29    | 37    | 32    | 156   | 180   | 187   | 192   |
| K02448 nitric oxide reductase NorD protein                                                                      | 2748  | 2754  | 2487  | 2552  | 1662  | 1454  | 1497  | 1697  | 951   | 779   | 765   | 839   |
| K02569 cytochrome c-type protein NapC                                                                           | 485   | 492   | 540   | 514   | 273   | 299   | 254   | 293   | 191   | 195   | 198   | 197   |
| K02570 periplasmic nitrate reductase NapD                                                                       | 430   | 487   | 433   | 435   | 232   | 236   | 241   | 259   | 143   |       |       |       |

|                                                                   |       |       |       |       |      |      |      |      |       |       |       |       |
|-------------------------------------------------------------------|-------|-------|-------|-------|------|------|------|------|-------|-------|-------|-------|
| K04014 protein NrfC                                               | 53    | 41    | 40    | 46    | 107  | 101  | 93   | 110  | 117   | 128   | 151   | 155   |
| K04015 protein NrfD                                               | 62    | 83    | 56    | 58    | 101  | 128  | 93   | 125  | 146   | 146   | 193   | 163   |
| K04016 cytochrome c-type biogenesis protein NrfE                  | 8     | 3     | 10    | 2     | 9    | 17   | 13   | 17   | 99    | 98    | 83    | 95    |
| K04017 formate-dependent nitrite reductase complex subunit NrfF   | 0     | 3     | 0     | 1     | 6    | 4    | 4    | 3    | 14    | 16    | 14    | 39    |
| K04018 formate-dependent nitrite reductase complex subunit NrfG   | 0     | 0     | 2     | 4     | 8    | 4    | 3    | 5    | 30    | 41    | 47    | 40    |
| K04488 nitrogen fixation protein NifU and related proteins        | 1371  | 1245  | 1308  | 1302  | 569  | 719  | 593  | 635  | 850   | 1048  | 992   | 1011  |
| K04747 nitric oxide reductase NorQ protein                        | 0     | 0     | 0     | 0     | 0    | 0    | 0    | 0    | 0     | 2     | 1     | 0     |
| K04748 nitric oxide reductase NorQ protein                        | 792   | 824   | 817   | 748   | 443  | 353  | 368  | 479  | 285   | 308   | 281   | 273   |
| K04755 ferredoxin, 2Fe-2S                                         | 716   | 790   | 740   | 728   | 478  | 489  | 497  | 446  | 473   | 514   | 478   | 498   |
| K05337 ferredoxin                                                 | 25    | 27    | 25    | 29    | 25   | 27   | 17   | 17   | 20    | 37    | 14    | 28    |
| K05524 ferredoxin                                                 | 906   | 840   | 823   | 864   | 483  | 513  | 462  | 506  | 286   | 257   | 261   | 277   |
| K05796 electron transport protein HydN                            | 565   | 573   | 517   | 598   | 364  | 363  | 340  | 346  | 897   | 867   | 860   | 931   |
| K06205 MloC protein                                               | 1006  | 959   | 934   | 967   | 546  | 593  | 611  | 559  | 607   | 639   | 550   | 585   |
| K06862 energy-converting hydrogenase B subunit Q                  | 0     | 0     | 0     | 0     | 0    | 0    | 0    | 0    | 1     | 1     | 5     | 2     |
| K09165 dodecin                                                    | 413   | 389   | 403   | 363   | 208  | 232  | 188  | 251  | 136   | 137   | 116   | 142   |
| K11107 ferredoxin                                                 | 160   | 178   | 155   | 179   | 122  | 117  | 95   | 102  | 216   | 236   | 202   | 213   |
| K12143 hydrogenase-4 component H                                  | 126   | 121   | 111   | 122   | 178  | 225  | 173  | 162  | 5     | 7     | 2     | 5     |
| K12262 cytochrome b561                                            | 1339  | 1296  | 1250  | 1196  | 844  | 868  | 895  | 902  | 470   | 428   | 482   | 499   |
| K13795 citrate/tricarballoylate utilization protein               | 1     | 4     | 0     | 0     | 2    | 0    | 0    | 0    | 0     | 0     | 3     | 0     |
| K13796 tricarballoylate dehydrogenase                             | 2     | 1     | 2     | 0     | 1    | 0    | 3    | 2    | 0     | 0     | 0     | 1     |
| K13819 NifU-like protein                                          | 188   | 163   | 171   | 155   | 217  | 220  | 235  | 201  | 6     | 13    | 11    | 10    |
| K14086 ech hydrogenase subunit A                                  | 59    | 52    | 73    | 57    | 18   | 16   | 20   | 19   | 66    | 110   | 105   | 86    |
| K14087 ech hydrogenase subunit B                                  | 12    | 17    | 17    | 13    | 3    | 5    | 7    | 6    | 12    | 15    | 8     | 7     |
| K14088 ech hydrogenase subunit C                                  | 24    | 33    | 26    | 24    | 6    | 5    | 3    | 3    | 55    | 46    | 40    | 34    |
| K14089 ech hydrogenase subunit D                                  | 22    | 19    | 26    | 17    | 5    | 4    | 5    | 4    | 34    | 44    | 46    | 31    |
| K14090 ech hydrogenase subunit E                                  | 77    | 103   | 100   | 72    | 25   | 29   | 16   | 19   | 144   | 123   | 161   | 136   |
| K14091 ech hydrogenase subunit F                                  | 7     | 5     | 6     | 7     | 1    | 1    | 5    | 9    | 9     | 18    | 11    | 5     |
| K14092 energy-converting hydrogenase A subunit A                  | 0     | 0     | 0     | 1     | 0    | 0    | 0    | 1    | 0     | 1     | 1     | 1     |
| K14093 energy-converting hydrogenase A subunit B                  | 0     | 0     | 0     | 0     | 0    | 0    | 0    | 0    | 1     | 2     | 3     | 8     |
| K14094 energy-converting hydrogenase A subunit C                  | 0     | 0     | 0     | 1     | 0    | 0    | 0    | 0    | 0     | 0     | 0     | 2     |
| K14095 energy-converting hydrogenase A subunit D                  | 0     | 0     | 0     | 1     | 0    | 0    | 0    | 0    | 2     | 2     | 1     | 3     |
| K14096 energy-converting hydrogenase A subunit E                  | 0     | 0     | 0     | 0     | 0    | 0    | 0    | 3    | 0     | 2     | 0     | 3     |
| K14097 energy-converting hydrogenase A subunit F                  | 0     | 0     | 0     | 0     | 0    | 0    | 0    | 0    | 0     | 3     | 1     | 4     |
| K14098 energy-converting hydrogenase A subunit G                  | 0     | 2     | 0     | 0     | 0    | 0    | 0    | 0    | 4     | 1     | 2     | 3     |
| K14099 energy-converting hydrogenase A subunit H                  | 0     | 3     | 0     | 0     | 0    | 0    | 0    | 2    | 10    | 5     | 1     | 4     |
| K14100 energy-converting hydrogenase A subunit I                  | 0     | 0     | 0     | 0     | 0    | 0    | 0    | 0    | 0     | 1     | 2     | 0     |
| K14101 energy-converting hydrogenase A subunit J                  | 0     | 2     | 0     | 0     | 2    | 0    | 2    | 0    | 2     | 1     | 3     | 13    |
| K14102 energy-converting hydrogenase A subunit K                  | 0     | 1     | 0     | 0     | 0    | 0    | 0    | 2    | 0     | 0     | 2     | 1     |
| K14103 energy-converting hydrogenase A subunit L                  | 0     | 1     | 0     | 0     | 0    | 0    | 2    | 0    | 0     | 0     | 2     | 1     |
| K14104 energy-converting hydrogenase A subunit M                  | 0     | 1     | 0     | 1     | 0    | 0    | 0    | 1    | 0     | 3     | 3     | 1     |
| K14105 energy-converting hydrogenase A subunit N                  | 0     | 0     | 0     | 1     | 0    | 0    | 0    | 0    | 4     | 7     | 3     | 6     |
| K14106 energy-converting hydrogenase A subunit O                  | 3     | 0     | 3     | 1     | 0    | 0    | 0    | 0    | 4     | 5     | 11    | 12    |
| K14107 energy-converting hydrogenase A subunit P                  | 0     | 0     | 2     | 1     | 1    | 0    | 0    | 0    | 0     | 5     | 5     | 9     |
| K14108 energy-converting hydrogenase A subunit Q                  | 0     | 0     | 1     | 3     | 2    | 0    | 0    | 0    | 2     | 17    | 8     | 7     |
| K14109 energy-converting hydrogenase A subunit R                  | 2     | 0     | 2     | 0     | 0    | 2    | 0    | 2    | 4     | 9     | 5     | 10    |
| K14110 energy-converting hydrogenase B subunit A                  | 0     | 0     | 0     | 0     | 0    | 0    | 0    | 1    | 3     | 5     | 0     | 4     |
| K14111 energy-converting hydrogenase B subunit B                  | 0     | 2     | 0     | 0     | 0    | 0    | 0    | 0    | 3     | 1     | 0     | 0     |
| K14112 energy-converting hydrogenase B subunit C                  | 0     | 0     | 0     | 1     | 0    | 1    | 0    | 3    | 2     | 1     | 1     | 0     |
| K14113 energy-converting hydrogenase B subunit D                  | 0     | 0     | 0     | 0     | 0    | 1    | 0    | 0    | 0     | 0     | 0     | 4     |
| K14114 energy-converting hydrogenase B subunit E                  | 0     | 0     | 0     | 0     | 0    | 0    | 0    | 2    | 0     | 4     | 3     | 2     |
| K14115 energy-converting hydrogenase B subunit F                  | 2     | 2     | 2     | 1     | 2    | 1    | 2    | 2    | 2     | 17    | 8     | 7     |
| K14116 energy-converting hydrogenase B subunit G                  | 0     | 0     | 2     | 0     | 0    | 0    | 0    | 1    | 0     | 0     | 0     | 1     |
| K14117 energy-converting hydrogenase B subunit H                  | 0     | 0     | 0     | 0     | 0    | 0    | 0    | 0    | 0     | 0     | 0     | 1     |
| K14118 energy-converting hydrogenase B subunit I                  | 0     | 0     | 0     | 1     | 0    | 0    | 0    | 0    | 4     | 1     | 3     | 4     |
| K14119 energy-converting hydrogenase B subunit J                  | 0     | 0     | 0     | 1     | 0    | 0    | 0    | 0    | 2     | 3     | 2     | 2     |
| K14120 energy-converting hydrogenase B subunit K                  | 0     | 2     | 0     | 1     | 0    | 2    | 1    | 2    | 3     | 10    | 8     | 13    |
| K14121 energy-converting hydrogenase B subunit L                  | 0     | 0     | 0     | 0     | 0    | 0    | 3    | 0    | 0     | 2     | 0     | 2     |
| K14122 energy-converting hydrogenase B subunit M                  | 0     | 0     | 0     | 0     | 0    | 0    | 1    | 2    | 0     | 0     | 0     | 1     |
| K14123 energy-converting hydrogenase B subunit N                  | 0     | 0     | 0     | 1     | 2    | 0    | 0    | 2    | 7     | 14    | 5     | 9     |
| K14124 energy-converting hydrogenase B subunit O                  | 0     | 0     | 2     | 0     | 0    | 4    | 0    | 0    | 5     | 7     | 2     | 3     |
| K14125 energy-converting hydrogenase B subunit P                  | 0     | 0     | 0     | 0     | 0    | 0    | 0    | 2    | 0     | 0     | 3     | 1     |
| K15536 soluble cytochrome b562                                    | 240   | 268   | 242   | 240   | 159  | 196  | 140  | 165  | 321   | 328   | 318   | 350   |
| K15790 nitrogen fixation protein NifQ                             | 105   | 93    | 104   | 118   | 157  | 163  | 132  | 158  | 2     | 0     | 0     | 0     |
| K15827 formate hydrogenylase subunit 2                            | 229   | 270   | 211   | 268   | 69   | 104  | 80   | 71   | 496   | 512   | 501   | 509   |
| K15828 formate hydrogenylase subunit 3                            | 737   | 794   | 738   | 790   | 208  | 233  | 220  | 227  | 1608  | 1565  | 1468  | 1523  |
| K15829 formate hydrogenylase subunit 4                            | 323   | 340   | 342   | 332   | 97   | 115  | 107  | 110  | 732   | 792   | 752   | 776   |
| K15830 formate hydrogenylase subunit 5                            | 695   | 716   | 592   | 726   | 220  | 187  | 199  | 221  | 1385  | 1455  | 1428  | 1481  |
| K15831 formate hydrogenylase subunit 6                            | 223   | 202   | 218   | 217   | 84   | 65   | 54   | 51   | 443   | 460   | 469   | 462   |
| K15832 formate hydrogenylase subunit 7                            | 295   | 319   | 294   | 330   | 99   | 117  | 99   | 81   | 634   | 675   | 589   | 643   |
| K16183 methylamine methyltransferase corrinoid activation protein | 0     | 0     | 0     | 0     | 0    | 0    | 0    | 1    | 2     | 0     | 1     | 1     |
| K16885 quinone-modifying oxidoreductase, subunit QmoA             | 7     | 12    | 8     | 3     | 3    | 4    | 6    | 0    | 13    | 13    | 24    | 15    |
| K16886 quinone-modifying oxidoreductase, subunit QmoB             | 13    | 16    | 13    | 17    | 3    | 13   | 8    | 3    | 28    | 32    | 15    | 31    |
| K16887 quinone-modifying oxidoreductase, subunit QmoC             | 4     | 9     | 12    | 7     | 4    | 4    | 2    | 1    | 12    | 17    | 11    | 19    |
| K19344 cytochrome c55X                                            | 340   | 371   | 313   | 378   | 197  | 197  | 174  | 178  | 124   | 110   | 89    | 120   |
| K19345 protein NrfF                                               | 1962  | 1923  | 1797  | 1896  | 1074 | 963  | 993  | 1129 | 649   | 515   | 588   | 633   |
| K19824 ruberythrin                                                | 0     | 0     | 0     | 0     | 0    | 0    | 2    | 0    | 1     | 4     | 4     | 4     |
| K21730 probable pyridine nucleotide-disulfide oxidoreductase      | 315   | 330   | 367   | 296   | 98   | 82   | 98   | 102  | 476   | 508   | 505   | 458   |
| K23077 dissimilatory sulfite reductase related protein            | 0     | 5     | 1     | 1     | 2    | 0    | 4    | 0    | 0     | 2     | 3     | 9     |
| K23302 menaquinone reductase, molybdopterin-binding-like subunit  | 14    | 6     | 7     | 17    | 6    | 5    | 3    | 4    | 2     | 1     | 5     | 5     |
| K23303 menaquinone reductase, integral membrane subunit           | 6     | 12    | 13    | 7     | 3    | 0    | 3    | 3    | 7     | 0     | 1     | 3     |
| ko99983 Lipid metabolism                                          | 5661  | 5491  | 5247  | 5338  | 3110 | 3156 | 2915 | 3363 | 2883  | 2833  | 2881  | 2938  |
| K09456 putative acyl-CoA dehydrogenase                            | 3808  | 3802  | 3586  | 3613  | 2055 | 2168 | 2037 | 2324 | 2255  | 2283  | 2330  | 2352  |
| K11729 acyl-CoA dehydrogenase family member 10                    | 3     | 5     | 2     | 1     | 2    | 0    | 1    | 1    | 1     | 2     | 3     | 2     |
| K11730 acyl-CoA dehydrogenase family member 11                    | 2     | 0     | 0     | 0     | 0    | 0    | 0    | 0    | 0     | 0     | 0     | 0     |
| K16229 glycopeptidolipid biosynthesis protein                     | 1     | 0     | 0     | 1     | 0    | 0    | 0    | 0    | 0     | 0     | 0     | 0     |
| K21834 phosphorylcholine phosphatase                              | 1847  | 1684  | 1659  | 1723  | 1053 | 988  | 877  | 1038 | 627   | 548   | 548   | 584   |
| ko99984 Nucleotide metabolism                                     | 442   | 456   | 365   | 422   | 216  | 225  | 235  | 219  | 423   | 448   | 390   | 434   |
| K03647 protein involved in ribonucleotide reduction               | 239   | 254   | 191   | 201   | 166  | 161  | 183  | 154  | 322   | 278   | 251   | 316   |
| K15051 DNA-entry nuclease                                         | 203   | 202   | 174   | 221   | 50   | 64   | 52   | 65   | 101   | 170   | 139   | 118   |
| ko99985 Amino acid metabolism                                     | 8786  | 8702  | 8725  | 8805  | 5157 | 5479 | 5434 | 5242 | 10754 | 11042 | 10603 | 11020 |
| K04023 ethanolamine transporter                                   | 935   | 968   | 891   | 952   | 337  | 359  | 382  | 326  | 1344  | 1419  | 1261  | 1349  |
| K04024 ethanolamine utilization protein EutJ                      | 560   | 611   | 650   | 585   | 165  | 206  | 184  | 142  | 886   | 869   | 833   | 869   |
| K04025 ethanolamine utilization protein EutK                      | 188   | 199   | 198   | 209   | 45   | 68   | 52   | 59   | 348   | 369   | 394   | 418   |
| K04026 ethanolamine utilization protein EutL                      | 316   | 353   | 341   | 327   | 93   | 88   | 103  | 97   | 619   | 719   | 689   | 714   |
| K04027 ethanolamine utilization protein EutM                      | 174   | 134   | 149   | 152   | 46   | 38   | 35   | 41   | 255   | 236   | 230   | 328   |
| K04028 ethanolamine utilization protein EutN                      | 304   | 297   | 288   | 274   | 62   | 73   | 90   | 75   | 403   | 443   | 431   | 434   |
| K04029 ethanolamine utilization protein EutP                      | 560   | 568   | 488   | 563   | 256  | 290  | 278  | 289  | 821   | 811   | 880   | 863   |
| K04030 ethanolamine utilization protein EutQ                      | 476   | 410   | 511   | 471   | 108  | 108  | 139  | 106  | 751   | 688   | 755   | 758   |
| K04031 ethanolamine utilization protein EutS                      | 521   | 505   | 473   | 536   | 215  | 245  | 256  | 192  | 721   | 789   | 708   | 694   |
| K05806 leu operon leader peptide                                  | 15    | 11    | 16    | 14    | 24   | 30   | 29   | 24   | 3     | 2     | 3     | 4     |
| K06203 CysZ protein                                               | 992   | 1003  | 1048  | 1041  | 600  | 644  | 688  | 701  | 771   | 951   | 872   | 866   |
| K06997 PLP dependent protein                                      | 2492  | 2416  | 2403  | 2443  | 2487 | 2564 | 2523 | 2429 | 2526  | 2434  | 2382  | 2419  |
| K08234 glyoxylase I family protein                                | 351   | 333   | 368   | 376   | 211  | 261  | 194  | 198  | 583   | 550   | 495   | 547   |
| K10795 D-proline reductase (dithiol)-stabilizing protein PrdD     | 0     | 0     | 0     | 0     | 0    | 0    | 0    | 0    | 0     | 1     | 1     | 1     |
| K10796 D-proline reductase (dithiol)-stabilizing protein PrdE     | 1     | 0     | 2     | 1     | 0    | 0    | 0    | 1    | 1     | 0     | 0     | 2     |
| K11325 L-cysteine/cystine lyase                                   | 20    | 16    | 9     | 17    | 0    | 0    | 0    | 0    | 13    | 16    | 8     | 10    |
| K14054 protein MpaA                                               | 407   | 366   | 419   | 407   | 248  | 253  | 227  | 295  | 568   | 605   | 525   | 565   |
| K18802 glutamine amidotransferase                                 | 0     | 0     | 2     | 0     | 0    | 0    | 0    | 0    | 0     | 0     | 0     | 0     |
| K21700 beta-alanine degradation protein BauB                      | 474   | 512   | 469   | 437   | 260  | 252  | 254  | 267  | 141   | 140   | 136   | 179   |
| ko99986 Glycan metabolism                                         | 10957 | 10977 | 10358 | 10400 | 6818 | 6824 | 6637 | 7029 | 4686  | 4649  | 4306  | 4691  |
| K03208 colanic acid biosynthesis glycosyl transferase WcaI        | 283   | 249   | 249   | 272   | 387  | 377  | 428  | 416  | 72    | 61    | 66    | 74    |
| K07270 glycosyl transferase, family 25                            | 0     | 2     | 0     | 0     | 2    | 5    | 0    | 0    | 2     | 5     | 6     | 3     |
| K08992 lipopolysaccharide assembly protein A                      | 169   | 159   | 195   | 177   | 116  | 112  | 151  | 117  | 226   | 257   | 218   | 203   |
| K13620 putative colanic acid polymerase                           | 242   | 203   | 212   | 269   | 363  | 363  | 428  | 366  | 64    | 73    | 69    | 75    |
| K16568 exopolysaccharide production protein ExoZ                  | 0     | 0     | 0     | 3     | 0    | 0    | 0    | 2    | 0     | 1     | 4     | 2     |
| K16707 UDP-galactose-lipid carrier transferase                    | 0     | 0     | 0     | 0     | 0    |      |      |      |       |       |       |       |

|                                                                          |        |        |        |        |        |        |        |        |        |        |        |        |
|--------------------------------------------------------------------------|--------|--------|--------|--------|--------|--------|--------|--------|--------|--------|--------|--------|
| K19295 alginate O-acetyltransferase complex protein AlgJ                 | 940    | 820    | 815    | 776    | 445    | 450    | 437    | 498    | 265    | 233    | 257    | 258    |
| K19296 alginate O-acetyltransferase complex protein AlgF                 | 828    | 795    | 720    | 811    | 414    | 407    | 400    | 444    | 249    | 237    | 231    | 227    |
| K19421 polysaccharide biosynthesis protein EpsC                          | 3      | 5      | 4      | 3      | 0      | 0      | 0      | 0      | 9      | 2      | 11     | 6      |
| K19804 lipopolysaccharide assembly protein B                             | 660    | 720    | 686    | 705    | 500    | 517    | 536    | 503    | 1009   | 1054   | 923    | 957    |
| K21688 resuscitation-promoting factor RpfB                               | 0      | 1      | 0      | 0      | 0      | 0      | 0      | 1      | 0      | 0      | 2      | 0      |
| ko99987 Cofactor metabolism                                              | 9552   | 9579   | 9355   | 9836   | 7410   | 7885   | 7472   | 7714   | 8999   | 8926   | 8830   | 9030   |
| K02173 putative kinase                                                   | 8      | 5      | 6      | 9      | 9      | 9      | 18     | 7      | 37     | 40     | 35     | 46     |
| K02498 HemY protein                                                      | 1673   | 1694   | 1649   | 1721   | 1018   | 1073   | 956    | 1053   | 1411   | 1322   | 1310   | 1286   |
| K02859 riboflavin biosynthesis RibT protein                              | 0      | 0      | 0      | 1      | 2      | 5      | 3      | 2      | 4      | 11     | 3      | 4      |
| K03688 ubiquinone biosynthesis protein                                   | 3437   | 3350   | 3343   | 3506   | 2011   | 2166   | 1986   | 2102   | 2506   | 2506   | 2440   | 2672   |
| K03690 ubiquinone biosynthesis protein UbiJ                              | 1501   | 1498   | 1442   | 1507   | 903    | 909    | 818    | 920    | 839    | 915    | 880    | 968    |
| K03753 molybdopterin-guanine dinucleotide biosynthesis adapter protein   | 348    | 364    | 358    | 346    | 263    | 321    | 296    | 273    | 491    | 500    | 488    | 528    |
| K12942 aminobenzoyl glutamate transport protein                          | 1792   | 1920   | 1830   | 2002   | 2818   | 3046   | 3053   | 2965   | 3486   | 3403   | 3416   | 3301   |
| K13580 magnesium chelatase subunit ChlD-like protein                     | 793    | 748    | 727    | 744    | 386    | 356    | 342    | 392    | 225    | 229    | 254    | 223    |
| K18588 coenzyme Q-binding protein COQ10                                  | 0      | 0      | 0      | 0      | 0      | 0      | 0      | 0      | 0      | 1      | 4      | 2      |
| ko99988 Secondary metabolism                                             | 8587   | 8248   | 7845   | 8055   | 5006   | 4968   | 4726   | 5012   | 5616   | 5568   | 5590   | 5798   |
| K03932 polyhydroxybutyrate depolymerase                                  | 1713   | 1536   | 1419   | 1562   | 883    | 862    | 828    | 862    | 497    | 445    | 491    | 477    |
| K04753 suppressor of ftsI                                                | 933    | 890    | 915    | 957    | 660    | 658    | 582    | 640    | 1174   | 1329   | 1272   | 1352   |
| K06219 S-adenosylmethionine-dependent methyltransferase                  | 1726   | 1709   | 1682   | 1670   | 1021   | 924    | 920    | 993    | 1251   | 1221   | 1243   | 1274   |
| K14588 blue copper oxidase                                               | 888    | 899    | 861    | 929    | 657    | 704    | 667    | 687    | 1214   | 1270   | 1261   | 1256   |
| K18004 HQNO biosynthesis monooxygenase PqsL                              | 2094   | 2040   | 1780   | 1816   | 1056   | 1059   | 1014   | 1103   | 702    | 560    | 547    | 590    |
| K19784 chromate reductase, NAD(P)H dehydrogenase (quinone)               | 1232   | 1174   | 1188   | 1121   | 729    | 759    | 715    | 727    | 778    | 743    | 776    | 849    |
| K23376 staphyloferrin B biosynthesis citrate synthase                    | 1      | 0      | 0      | 0      | 0      | 2      | 0      | 0      | 0      | 0      | 0      | 0      |
| ko99999 Others                                                           | 7232   | 7597   | 7270   | 7419   | 8553   | 8615   | 8619   | 8235   | 8972   | 8753   | 8903   | 9080   |
| K06999 phospholipase/carboxylesterase                                    | 1532   | 1591   | 1478   | 1500   | 903    | 878    | 830    | 859    | 1010   | 991    | 977    | 1071   |
| K05851 acetyltransferase                                                 | 2728   | 2774   | 2786   | 2800   | 5107   | 5347   | 5341   | 4874   | 5500   | 5338   | 5534   | 5512   |
| K15075 glyoxalase family protein                                         | 153    | 165    | 177    | 173    | 32     | 21     | 33     | 30     | 193    | 185    | 172    | 164    |
| K15977 putative oxidoreductase                                           | 1315   | 1458   | 1401   | 1423   | 1623   | 1594   | 1601   | 1549   | 1785   | 1775   | 1745   | 1792   |
| K21831 cholinesterase                                                    | 1504   | 1609   | 1428   | 1523   | 888    | 775    | 814    | 923    | 484    | 464    | 475    | 541    |
| Unclassified: genetic information processing                             | 125734 | 126742 | 126387 | 127572 | 140283 | 141546 | 129488 | 132441 | 130762 | 129906 | 130795 | 129454 |
| ko99973 Transcription                                                    | 15183  | 15122  | 15143  | 15212  | 12004  | 12068  | 11761  | 11714  | 13002  | 12850  | 12937  | 13005  |
| K02466 glucitol operon activator protein                                 | 236    | 226    | 205    | 275    | 156    | 200    | 206    | 168    | 357    | 356    | 309    | 341    |
| K02589 nitrogen regulatory protein PII 1                                 | 89     | 64     | 65     | 85     | 11     | 14     | 16     | 6      | 128    | 145    | 157    | 146    |
| K02590 nitrogen regulatory protein PII 2                                 | 70     | 65     | 64     | 60     | 12     | 3      | 12     | 11     | 124    | 133    | 118    | 120    |
| K03622 archaea-specific DNA-binding protein                              | 0      | 0      | 0      | 0      | 0      | 0      | 0      | 0      | 1      | 2      | 2      | 1      |
| K03623 ribonuclease inhibitor                                            | 191    | 147    | 160    | 157    | 127    | 136    | 125    | 115    | 243    | 241    | 245    | 246    |
| K03627 putative transcription factor                                     | 0      | 0      | 0      | 0      | 0      | 0      | 0      | 0      | 3      | 2      | 0      | 4      |
| K03704 cold shock protein                                                | 3198   | 3242   | 3230   | 3209   | 1739   | 1778   | 1720   | 1675   | 2136   | 2203   | 2145   | 2261   |
| K04752 nitrogen regulatory protein P-II 2                                | 828    | 845    | 826    | 839    | 528    | 577    | 496    | 553    | 523    | 542    | 480    | 490    |
| K04796 small nuclear ribonucleoprotein                                   | 0      | 0      | 0      | 0      | 0      | 0      | 0      | 0      | 0      | 2      | 5      | 1      |
| K06959 protein Tex                                                       | 8174   | 8079   | 8125   | 8135   | 8233   | 8177   | 8038   | 7973   | 7530   | 7357   | 7519   | 7467   |
| K07591 threonine dehydratase operon activator protein                    | 2      | 2      | 1      | 2      | 2      | 5      | 3      | 7      | 22     | 21     | 23     | 28     |
| K07740 regulator of sigma D                                              | 1251   | 1183   | 1199   | 1257   | 773    | 743    | 723    | 791    | 795    | 742    | 748    | 757    |
| K07741 anti-repressor protein                                            | 780    | 846    | 814    | 817    | 270    | 292    | 289    | 314    | 313    | 294    | 326    | 314    |
| K07744 transcriptional regulator                                         | 0      | 5      | 0      | 1      | 0      | 0      | 3      | 0      | 6      | 0      | 3      | 6      |
| K15833 formate hydrogenlyase regulatory protein HycA                     | 199    | 213    | 188    | 187    | 80     | 63     | 59     | 56     | 422    | 392    | 452    | 434    |
| K15834 formate hydrogenlyase maturation protein HycH                     | 143    | 174    | 146    | 162    | 53     | 63     | 45     | 39     | 364    | 371    | 359    | 353    |
| K16509 regulatory protein spx                                            | 22     | 31     | 20     | 26     | 20     | 17     | 26     | 6      | 35     | 47     | 46     | 36     |
| ko99974 Translation                                                      | 7135   | 7095   | 7049   | 7456   | 3574   | 3570   | 3155   | 3681   | 4750   | 4677   | 4701   | 4977   |
| K07570 general stress protein 13                                         | 30     | 30     | 21     | 23     | 4      | 12     | 4      | 4      | 39     | 29     | 24     | 32     |
| K07571 S1 RNA binding domain protein                                     | 43     | 51     | 79     | 56     | 26     | 25     | 42     | 29     | 46     | 58     | 54     | 79     |
| K07572 putative nucleotide binding protein                               | 0      | 0      | 0      | 0      | 0      | 0      | 0      | 0      | 1      | 1      | 1      | 6      |
| K07575 PUA domain protein                                                | 0      | 0      | 0      | 0      | 1      | 0      | 0      | 0      | 2      | 5      | 2      | 7      |
| K07576 metallo-beta-lactamase family protein                             | 1451   | 1491   | 1410   | 1539   | 626    | 593    | 498    | 581    | 966    | 955    | 944    | 1033   |
| K07577 putative mRNA 3'-end processing factor                            | 1      | 0      | 2      | 3      | 2      | 1      | 0      | 0      | 4      | 3      | 0      | 4      |
| K07579 putative methylase                                                | 0      | 0      | 1      | 0      | 2      | 2      | 2      | 0      | 0      | 4      | 3      | 4      |
| K07580 Zn-ribbon RNA-binding protein                                     | 0      | 0      | 0      | 1      | 0      | 0      | 0      | 0      | 0      | 0      | 0      | 1      |
| K07581 RNA-binding protein                                               | 0      | 0      | 0      | 0      | 0      | 2      | 2      | 0      | 2      | 0      | 3      | 1      |
| K07585 RNA methyltransferase                                             | 0      | 0      | 0      | 0      | 0      | 1      | 0      | 2      | 0      | 5      | 2      | 4      |
| K13926 ribosome-dependent ATPase                                         | 5610   | 5523   | 5536   | 5834   | 2913   | 2934   | 2607   | 3065   | 3690   | 3617   | 3668   | 3806   |
| ko99975 Protein processing                                               | 39934  | 39715  | 38004  | 39530  | 28186  | 28122  | 27285  | 28845  | 30048  | 30436  | 29983  | 30432  |
| K02380 FdhE protein                                                      | 2172   | 2080   | 1804   | 2003   | 1326   | 1295   | 1121   | 1346   | 1298   | 1401   | 1301   | 1340   |
| K03187 urease accessory protein                                          | 837    | 860    | 692    | 825    | 338    | 380    | 318    | 348    | 713    | 699    | 649    | 694    |
| K03188 urease accessory protein                                          | 704    | 640    | 628    | 695    | 229    | 278    | 225    | 260    | 825    | 846    | 772    | 878    |
| K03189 urease accessory protein                                          | 753    | 712    | 732    | 763    | 332    | 340    | 290    | 326    | 732    | 745    | 699    | 716    |
| K03190 urease accessory protein                                          | 1661   | 1691   | 1567   | 1561   | 777    | 772    | 718    | 885    | 1071   | 1095   | 1133   | 1147   |
| K03192 urease accessory protein                                          | 1014   | 927    | 789    | 829    | 468    | 462    | 464    | 566    | 283    | 248    | 216    | 294    |
| K03545 trigger factor                                                    | 2970   | 2978   | 3203   | 3027   | 4323   | 4187   | 4149   | 4091   | 4512   | 4673   | 4584   | 4511   |
| K03664 SsrA-binding protein                                              | 1445   | 1452   | 1504   | 1503   | 1531   | 1572   | 1577   | 1569   | 1572   | 1574   | 1558   | 1503   |
| K03668 heat shock protein HslJ                                           | 875    | 982    | 892    | 927    | 527    | 572    | 523    | 563    | 550    | 579    | 600    | 549    |
| K04063 lipoyl-dependent peroxidase                                       | 1865   | 1814   | 1716   | 1835   | 1299   | 1194   | 1143   | 1380   | 847    | 847    | 806    | 840    |
| K04653 hydrogenase expression/formation protein HycP                     | 240    | 207    | 163    | 217    | 200    | 198    | 220    | 219    | 208    | 212    | 198    | 215    |
| K04654 hydrogenase expression/formation protein HycD                     | 892    | 832    | 798    | 831    | 569    | 633    | 633    | 666    | 1122   | 1180   | 1156   | 1184   |
| K04655 hydrogenase expression/formation protein HycE                     | 784    | 722    | 642    | 805    | 518    | 555    | 538    | 563    | 1014   | 1010   | 1103   | 987    |
| K04656 hydrogenase maturation protein HycF                               | 1584   | 1610   | 1452   | 1601   | 1084   | 1150   | 1095   | 1064   | 2073   | 2184   | 2055   | 2228   |
| K06151 glutaredoxin-like protein NrdH                                    | 193    | 161    | 172    | 184    | 111    | 114    | 134    | 108    | 203    | 238    | 200    | 215    |
| K06891 ATP-dependent Clp protease adaptor protein ClpS                   | 603    | 555    | 572    | 559    | 322    | 364    | 291    | 325    | 388    | 411    | 457    | 386    |
| K07388 hydrogenase expression/formation protein                          | 0      | 3      | 0      | 1      | 0      | 0      | 2      | 0      | 4      | 11     | 8      | 10     |
| K07391 magnesium chelatase family protein                                | 5000   | 5358   | 4996   | 5242   | 5169   | 5203   | 5196   | 5379   | 4843   | 4585   | 4800   | 4818   |
| K07392 AAA family ATPase                                                 | 0      | 3      | 1      | 0      | 1      | 0      | 0      | 0      | 4      | 8      | 3      | 5      |
| K07394 SM-20-related protein                                             | 998    | 922    | 829    | 974    | 509    | 527    | 517    | 546    | 292    | 318    | 280    | 329    |
| K07395 putative proteasome-type protease                                 | 1543   | 1441   | 1519   | 1431   | 868    | 914    | 816    | 836    | 829    | 829    | 859    | 849    |
| K07396 putative protein-disulfide isomerase                              | 2293   | 2330   | 2132   | 2287   | 1385   | 1337   | 1298   | 1461   | 660    | 599    | 680    | 666    |
| K07397 putative redox protein                                            | 1619   | 1547   | 1626   | 1695   | 991    | 939    | 889    | 868    | 769    | 743    | 659    | 765    |
| K07399 cytochrome c biogenesis protein                                   | 2      | 0      | 1      | 0      | 0      | 0      | 0      | 0      | 0      | 0      | 0      | 0      |
| K07400 Fe/S biogenesis protein NfuA                                      | 1065   | 997    | 1079   | 1079   | 636    | 645    | 617    | 643    | 702    | 724    | 722    | 684    |
| K07401 selenoprotein W-related protein                                   | 614    | 674    | 593    | 615    | 369    | 337    | 315    | 372    | 423    | 434    | 361    | 426    |
| K07402 xanthine dehydrogenase accessory factor                           | 3681   | 3781   | 3636   | 3683   | 1946   | 1816   | 1901   | 1966   | 1860   | 1816   | 1688   | 1680   |
| K07403 membrane-bound serine protease (ClpP class)                       | 2182   | 2230   | 1918   | 2020   | 1090   | 1063   | 1109   | 1218   | 687    | 649    | 611    | 686    |
| K11208 GST-like protein                                                  | 303    | 319    | 329    | 326    | 239    | 259    | 187    | 275    | 469    | 520    | 442    | 479    |
| K16511 adapter protein MecA 1/2                                          | 453    | 403    | 473    | 413    | 110    | 97     | 112    | 95     | 287    | 344    | 357    | 358    |
| K17247 methionine sulfoxide reductase heme-binding subunit               | 1366   | 1285   | 1346   | 1388   | 885    | 879    | 847    | 877    | 843    | 792    | 897    | 854    |
| K19411 protein arginine kinase activator                                 | 223    | 199    | 200    | 211    | 34     | 40     | 40     | 30     | 145    | 122    | 129    | 136    |
| ko99976 Replication and repair                                           | 62956  | 64271  | 65678  | 64812  | 96117  | 97350  | 86849  | 87782  | 82278  | 81169  | 82483  | 80293  |
| K01146 protein Xni                                                       | 334    | 361    | 356    | 381    | 300    | 312    | 326    | 338    | 407    | 493    | 441    | 493    |
| K02086 DNA replication protein                                           | 40     | 49     | 39     | 37     | 4      | 5      | 14     | 12     | 30     | 61     | 44     | 37     |
| K03630 DNA repair protein RadC                                           | 4666   | 4671   | 4599   | 4662   | 4330   | 4426   | 4258   | 4192   | 3804   | 3836   | 3747   | 3607   |
| K04096 DNA processing protein                                            | 2482   | 2663   | 2427   | 2633   | 3419   | 3454   | 3585   | 3557   | 3576   | 3545   | 3314   | 3431   |
| K06909 phage terminase large subunit                                     | 536    | 440    | 546    | 478    | 118    | 114    | 99     | 108    | 272    | 337    | 260    | 304    |
| K06919 putative DNA primase/helicase                                     | 1894   | 1913   | 1949   | 1919   | 1590   | 1725   | 1574   | 1701   | 1041   | 1162   | 1199   | 1186   |
| K06993 ribonuclease H-related protein                                    | 8      | 17     | 15     | 21     | 3      | 7      | 7      | 4      | 6      | 18     | 4      | 16     |
| K07357 type 1 fimbriae regulatory protein FimB                           | 254    | 246    | 275    | 300    | 84     | 90     | 82     | 72     | 529    | 596    | 537    | 575    |
| K07358 type 1 fimbriae regulatory protein FimE                           | 227    | 214    | 209    | 241    | 75     | 66     | 61     | 89     | 465    | 416    | 437    | 498    |
| K07443 methylated-DNA-protein-cysteine methyltransferase related protein | 1287   | 1315   | 1188   | 1313   | 1287   | 1216   | 1235   | 1229   | 1216   | 1113   | 1262   | 1080   |
| K07445 putative DNA methylase                                            | 0      | 0      | 0      | 1      | 0      | 0      | 0      | 0      | 1      | 4      | 3      | 4      |
| K07449 similar to archaeal Holliday junction resolvase and Mrr protein   | 0      | 0      | 1      | 0      | 0      | 0      | 0      | 0      | 0      | 0      | 3      | 0      |
| K07453 putative restriction endonuclease                                 | 1215   | 1177   |        |        |        |        |        |        |        |        |        |        |

|                                                                             |        |        |        |        |        |        |        |        |        |        |        |        |
|-----------------------------------------------------------------------------|--------|--------|--------|--------|--------|--------|--------|--------|--------|--------|--------|--------|
| K07483 transposase                                                          | 1577   | 1561   | 1677   | 1676   | 818    | 859    | 681    | 641    | 1312   | 1512   | 1355   | 1444   |
| K07484 transposase                                                          | 15019  | 16486  | 17586  | 16296  | 56980  | 57237  | 48110  | 48958  | 44299  | 42213  | 44864  | 41872  |
| K07486 transposase                                                          | 0      | 0      | 2      | 1      | 6      | 5      | 5      | 8      | 4      | 3      | 10     | 9      |
| K07487 transposase                                                          | 617    | 667    | 655    | 633    | 424    | 384    | 362    | 363    | 224    | 259    | 211    | 184    |
| K07488 transposase                                                          | 0      | 2      | 2      | 0      | 1      | 2      | 0      | 0      | 0      | 3      | 2      | 1      |
| K07489 transposase                                                          | 0      | 0      | 0      | 0      | 0      | 0      | 0      | 0      | 0      | 0      | 1      | 0      |
| K07491 putative transposase                                                 | 1064   | 1027   | 1017   | 1033   | 950    | 1033   | 943    | 1003   | 653    | 664    | 627    | 668    |
| K07492 putative transposase                                                 | 1      | 1      | 2      | 1      | 0      | 0      | 0      | 0      | 0      | 1      | 3      | 4      |
| K07493 putative transposase                                                 | 527    | 489    | 571    | 508    | 401    | 459    | 434    | 422    | 314    | 325    | 303    | 313    |
| K07495 putative transposase                                                 | 2      | 2      | 2      | 1      | 3      | 3      | 5      | 7      | 56     | 49     | 51     | 58     |
| K07496 putative transposase                                                 | 179    | 191    | 202    | 223    | 355    | 344    | 323    | 357    | 315    | 316    | 302    | 310    |
| K07497 putative transposase                                                 | 12498  | 12627  | 12716  | 12697  | 7720   | 8092   | 7462   | 7500   | 8336   | 8500   | 8214   | 8653   |
| K07498 putative transposase                                                 | 366    | 353    | 339    | 420    | 119    | 129    | 119    | 154    | 181    | 209    | 188    | 207    |
| K07499 putative transposase                                                 | 0      | 0      | 0      | 0      | 0      | 2      | 0      | 0      | 0      | 0      | 0      | 0      |
| K07501 3'-5' exonuclease                                                    | 0      | 2      | 0      | 1      | 2      | 0      | 1      | 0      | 1      | 0      | 0      | 0      |
| K07505 regulatory protein RepA                                              | 1351   | 1385   | 1400   | 1341   | 783    | 816    | 764    | 754    | 458    | 483    | 506    | 506    |
| K09760 DNA recombination protein RmuC                                       | 3554   | 3555   | 3754   | 3548   | 3958   | 3876   | 3718   | 3887   | 3297   | 3347   | 3239   | 3245   |
| K10762 putative replication protein                                         | 0      | 0      | 0      | 1      | 0      | 2      | 1      | 0      | 2      | 0      | 5      | 0      |
| K14059 integrase                                                            | 1087   | 1011   | 1141   | 1152   | 904    | 911    | 932    | 907    | 275    | 302    | 305    | 278    |
| K14060 putative DNA-invertase from lambdoid prophage Rac                    | 182    | 202    | 211    | 235    | 284    | 339    | 277    | 280    | 112    | 129    | 128    | 124    |
| K18320 transposase, IS6 family                                              | 379    | 331    | 371    | 334    | 540    | 546    | 465    | 491    | 46     | 49     | 27     | 37     |
| ko99998 Others                                                              | 526    | 539    | 513    | 562    | 402    | 436    | 438    | 419    | 684    | 774    | 691    | 747    |
| K03969 phage shock protein A                                                | 335    | 356    | 357    | 411    | 241    | 280    | 262    | 221    | 450    | 570    | 501    | 533    |
| K03971 phage shock protein D                                                | 135    | 112    | 103    | 110    | 75     | 76     | 76     | 86     | 176    | 158    | 156    | 184    |
| K03972 phage shock protein E                                                | 53     | 69     | 51     | 41     | 80     | 66     | 89     | 98     | 30     | 23     | 11     | 10     |
| K07504 predicted type IV restriction endonuclease                           | 3      | 2      | 2      | 0      | 6      | 14     | 11     | 14     | 28     | 23     | 23     | 20     |
| Unclassified: signaling and cellular processes                              | 237972 | 237817 | 236931 | 239334 | 238163 | 240445 | 239553 | 240111 | 237762 | 238299 | 236919 | 238552 |
| ko99977 Transport                                                           | 97253  | 97592  | 97859  | 98594  | 107521 | 108423 | 108177 | 108675 | 107036 | 107130 | 106473 | 107028 |
| K03281 chloride channel protein, CIC family                                 | 2389   | 2473   | 2551   | 2613   | 4587   | 4688   | 4631   | 4558   | 4831   | 4866   | 4806   | 4956   |
| K03285 general bacterial porin, GBP family                                  | 31     | 28     | 34     | 33     | 46     | 56     | 43     | 44     | 46     | 66     | 64     | 54     |
| K03292 glycoside/pentoside/hexuronide:cation symporter, GPH family          | 7894   | 8058   | 8396   | 8358   | 8592   | 9099   | 8797   | 8597   | 13208  | 13552  | 13427  | 13196  |
| K03293 amino acid transporter, AAT family                                   | 3346   | 3279   | 3096   | 3410   | 1867   | 1934   | 1726   | 1963   | 2428   | 2552   | 2647   | 2497   |
| K03294 basic amino acid/polymaine antiporter, APA family                    | 2309   | 2495   | 2352   | 2391   | 1454   | 1515   | 1500   | 1503   | 1320   | 1367   | 1263   | 1432   |
| K03296 hydrophobic/amphiphilic exporter-1 (mainly G- bacteria), HAE1 family | 3315   | 3456   | 3722   | 3497   | 9140   | 9093   | 9294   | 9315   | 5694   | 5772   | 5707   | 5439   |
| K03300 citrate-Mg2+-H+ or citrate-Ca2+-H+ symporter, CITMHS family          | 2168   | 2078   | 2159   | 2061   | 1151   | 1119   | 1029   | 1164   | 766    | 729    | 731    | 753    |
| K03305 proton-dependent oligopeptide transporter, POT family                | 5195   | 5228   | 5336   | 5291   | 7097   | 7263   | 7464   | 7170   | 10519  | 10263  | 10203  | 10254  |
| K03306 inorganic phosphate transporter, PIT family                          | 5724   | 5602   | 5499   | 5631   | 4676   | 4763   | 4620   | 4842   | 3495   | 3168   | 3081   | 3184   |
| K03307 solute:Na+ symporter, SSS family                                     | 9003   | 9079   | 8979   | 9136   | 12466  | 12498  | 12483  | 12230  | 10757  | 10607  | 10939  | 10700  |
| K03308 neurotransmitter:Na+ symporter, NSS family                           | 3965   | 3734   | 4017   | 3746   | 4022   | 4257   | 4481   | 4144   | 4913   | 5436   | 5236   | 5167   |
| K03309 dicarboxylate/amino acid:cation (Na+ or H+) symporter, DAACS family  | 22     | 19     | 19     | 23     | 22     | 39     | 26     | 34     | 28     | 23     | 28     | 15     |
| K03310 alanine or glycine:cation symporter, AGCS family                     | 6660   | 6501   | 6504   | 6645   | 5871   | 5962   | 6067   | 5992   | 6675   | 6661   | 6599   | 6680   |
| K03311 branched-chain amino acid:cation transporter, LIVCS family           | 3118   | 3088   | 2967   | 3142   | 1720   | 1764   | 1567   | 1789   | 2435   | 2448   | 2345   | 2580   |
| K03316 monovalent cation:H+ antiporter, CPA1 family                         | 5462   | 5420   | 5955   | 5649   | 3004   | 2861   | 2871   | 3195   | 4006   | 4030   | 3889   | 4015   |
| K03317 concentrative nucleoside transporter, CNT family                     | 1160   | 1091   | 1124   | 1086   | 564    | 623    | 576    | 625    | 1760   | 1760   | 1705   | 1983   |
| K03319 divalent anion:Na+ symporter, DASS family                            | 818    | 787    | 847    | 878    | 1053   | 1083   | 1074   | 1064   | 288    | 260    | 261    | 294    |
| K03328 polysaccharide transporter, PST family                               | 188    | 192    | 184    | 190    | 252    | 289    | 251    | 259    | 315    | 309    | 290    | 333    |
| K03451 betaine/carnitine transporter, BCCT family                           | 1198   | 1255   | 1185   | 1210   | 359    | 332    | 326    | 289    | 1405   | 1490   | 1489   | 1495   |
| K03453 bile acid:Na+ symporter, BASS family                                 | 4057   | 4076   | 4073   | 4018   | 3819   | 3688   | 3608   | 3655   | 3078   | 2922   | 2950   | 2960   |
| K03455 monovalent cation:H+ antiporter-2, CPA2 family                       | 9837   | 9785   | 9947   | 9857   | 12870  | 12586  | 13185  | 13218  | 9703   | 9674   | 9497   | 9565   |
| K03457 nucleobase:cation symporter-1, NCS1 family                           | 1810   | 9204   | 8630   | 8750   | 5076   | 4901   | 4541   | 4979   | 4743   | 4393   | 4340   | 4614   |
| K03458 nucleobase:cation symporter-2, NCS2 family                           | 2371   | 2164   | 2202   | 2181   | 1162   | 1156   | 1102   | 1189   | 751    | 792    | 812    | 818    |
| K07011 rhamnosyltransferase                                                 | 0      | 0      | 0      | 0      | 1      | 5      | 0      | 0      | 0      | 0      | 0      | 1      |
| K07085 putative transport protein                                           | 6241   | 6432   | 6970   | 6679   | 15436  | 15624  | 15869  | 15653  | 12419  | 12503  | 12752  | 12518  |
| K21990 formate-nitrite transporter family protein                           | 1883   | 1889   | 1790   | 1941   | 1115   | 1084   | 909    | 1103   | 1081   | 1171   | 1123   | 1249   |
| K23243 nickel/cobalt homeostasis protein                                    | 189    | 179    | 181    | 178    | 99     | 141    | 137    | 124    | 252    | 306    | 227    | 276    |
| ko99978 Cell growth                                                         | 16189  | 16041  | 15938  | 16131  | 8820   | 9372   | 8971   | 8371   | 14171  | 15347  | 14813  | 15262  |
| K06190 intracellular septation protein                                      | 1044   | 945    | 951    | 1038   | 600    | 718    | 579    | 580    | 560    | 559    | 601    | 578    |
| K06287 septum formation protein                                             | 2035   | 2116   | 2163   | 2066   | 2157   | 2254   | 2200   | 2104   | 2116   | 2134   | 2020   | 2137   |
| K06295 spore germination protein KA                                         | 32     | 19     | 15     | 37     | 9      | 3      | 10     | 4      | 21     | 24     | 25     | 27     |
| K06297 spore germination protein KC                                         | 6      | 5      | 3      | 2      | 0      | 4      | 2      | 3      | 9      | 3      | 4      | 4      |
| K06298 germination protein M                                                | 66     | 94     | 76     | 84     | 40     | 40     | 40     | 42     | 85     | 155    | 100    | 128    |
| K06305 spore germination protein Q                                          | 0      | 0      | 0      | 0      | 0      | 0      | 0      | 0      | 0      | 1      | 0      | 0      |
| K06306 spore germination protein                                            | 667    | 677    | 671    | 673    | 144    | 157    | 139    | 135    | 408    | 510    | 532    | 520    |
| K06308 spore germination protein                                            | 3      | 2      | 0      | 0      | 0      | 0      | 0      | 0      | 0      | 0      | 0      | 0      |
| K06310 spore germination protein                                            | 70     | 58     | 58     | 66     | 3      | 6      | 2      | 0      | 204    | 187    | 157    | 211    |
| K06313 spore germination protein                                            | 2      | 0      | 0      | 0      | 0      | 0      | 0      | 0      | 0      | 0      | 0      | 0      |
| K06317 inhibitor of the pro-sigma K processing machinery                    | 18     | 12     | 15     | 14     | 8      | 16     | 13     | 5      | 26     | 18     | 43     | 27     |
| K06320 spore maturation protein CgeB                                        | 6      | 16     | 8      | 11     | 1      | 5      | 6      | 3      | 15     | 41     | 29     | 21     |
| K06327 spore coat protein D                                                 | 0      | 0      | 0      | 0      | 0      | 0      | 0      | 1      | 0      | 0      | 0      | 0      |
| K06330 spore coat protein H                                                 | 8      | 6      | 7      | 12     | 8      | 10     | 3      | 3      | 5      | 5      | 8      | 6      |
| K06333 spore coat protein JB                                                | 282    | 276    | 237    | 261    | 38     | 87     | 95     | 49     | 230    | 251    | 238    | 291    |
| K06334 spore coat protein JC                                                | 527    | 502    | 495    | 530    | 132    | 142    | 158    | 117    | 557    | 602    | 570    | 555    |
| K06338 spore coat protein SA                                                | 19     | 20     | 25     | 22     | 57     | 76     | 91     | 77     | 45     | 51     | 52     | 71     |
| K06344 spore coat protein Z                                                 | 3      | 0      | 0      | 0      | 0      | 0      | 0      | 2      | 0      | 0      | 0      | 0      |
| K06346 spoIIJ-associated protein                                            | 499    | 536    | 572    | 518    | 122    | 183    | 175    | 146    | 443    | 512    | 500    | 530    |
| K06348 sporulation inhibitor KapD                                           | 11     | 13     | 13     | 19     | 0      | 0      | 0      | 0      | 20     | 28     | 38     | 26     |
| K06349 KlnB signaling pathway activation protein                            | 0      | 0      | 0      | 0      | 0      | 0      | 0      | 2      | 0      | 0      | 0      | 0      |
| K06350 antagonist of KlpI                                                   | 1      | 2      | 0      | 1      | 8      | 9      | 7      | 10     | 2      | 2      | 0      | 1      |
| K06351 inhibitor of KinA                                                    | 0      | 2      | 0      | 0      | 0      | 0      | 1      | 0      | 0      | 1      | 0      | 1      |
| K06373 spore maturation protein A                                           | 342    | 333    | 346    | 310    | 106    | 111    | 82     | 98     | 276    | 312    | 301    | 308    |
| K06374 spore maturation protein B                                           | 359    | 279    | 283    | 308    | 95     | 106    | 108    | 82     | 221    | 273    | 253    | 270    |
| K06378 stage II sporulation protein AA (anti-sigma F factor antagonist)     | 153    | 129    | 144    | 142    | 46     | 59     | 50     | 39     | 124    | 97     | 93     | 138    |
| K06381 stage II sporulation protein D                                       | 628    | 586    | 554    | 574    | 162    | 196    | 209    | 168    | 563    | 560    | 526    | 574    |
| K06384 stage II sporulation protein M                                       | 140    | 108    | 111    | 128    | 68     | 72     | 57     | 33     | 109    | 113    | 141    | 132    |
| K06385 stage II sporulation protein P                                       | 373    | 386    | 347    | 372    | 109    | 138    | 130    | 131    | 255    | 357    | 356    | 293    |
| K06386 stage II sporulation protein Q                                       | 0      | 1      | 0      | 1      | 0      | 0      | 0      | 0      | 2      | 0      | 0      | 1      |
| K06387 stage II sporulation protein R                                       | 306    | 296    | 262    | 308    | 62     | 64     | 81     | 71     | 263    | 276    | 254    | 251    |
| K06390 stage III sporulation protein AA                                     | 526    | 480    | 456    | 519    | 134    | 140    | 124    | 122    | 347    | 346    | 377    | 369    |
| K06391 stage III sporulation protein AB                                     | 200    | 193    | 171    | 168    | 48     | 40     | 48     | 48     | 129    | 162    | 151    | 179    |
| K06392 stage III sporulation protein AC                                     | 86     | 87     | 90     | 90     | 28     | 24     | 34     | 22     | 71     | 80     | 52     | 81     |
| K06393 stage III sporulation protein AD                                     | 188    | 165    | 177    | 177    | 46     | 67     | 46     | 30     | 152    | 167    | 140    | 147    |
| K06394 stage III sporulation protein AE                                     | 444    | 410    | 443    | 392    | 118    | 111    | 101    | 122    | 299    | 316    | 348    | 353    |
| K06395 stage III sporulation protein AF                                     | 162    | 132    | 174    | 183    | 42     | 41     | 56     | 38     | 100    | 107    | 121    | 125    |
| K06396 stage III sporulation protein AG                                     | 220    | 199    | 199    | 214    | 44     | 71     | 67     | 54     | 159    | 153    | 129    | 133    |
| K06397 stage III sporulation protein AH                                     | 343    | 317    | 306    | 312    | 81     | 91     | 84     | 64     | 264    | 237    | 255    | 261    |
| K06398 stage IV sporulation protein A                                       | 642    | 667    | 741    | 704    | 217    | 219    | 231    | 203    | 565    | 756    | 579    | 630    |
| K06400 site-specific DNA recombinase                                        | 83     | 93     | 83     | 91     | 113    | 123    | 129    | 113    | 35     | 68     | 63     | 71     |
| K06403 stage V sporulation protein AA                                       | 238    | 249    | 259    | 276    | 28     | 65     | 57     | 42     | 239    | 215    | 246    | 270    |
| K06404 stage V sporulation protein AB                                       | 146    | 169    | 161    | 127    | 35     | 46     | 29     | 29     | 116    | 135    | 126    | 141    |
| K06405 stage V sporulation protein AC                                       | 213    | 226    | 201    | 200    | 91     | 81     | 69     | 74     | 177    | 219    | 199    | 198    |
| K06406 stage V sporulation protein AD                                       | 431    | 493    | 480    | 463    | 176    | 149    | 149    | 135    | 470    | 519    | 480    | 478    |
| K06407 stage V sporulation protein AE                                       | 193    | 169    | 204    | 170    | 71     | 47     | 69     | 53     | 152    | 156    | 148    | 107    |
| K06408 stage V sporulation protein AF                                       | 597    | 648    | 619    | 595    | 172    | 185    | 212    | 152    | 344    | 444    | 355    | 353    |
| K06410 dipicolinate synthase subunit A                                      | 258    | 263    | 248    | 269    | 50     | 41     | 38     | 39     | 206    | 230    | 220    | 230    |
| K06411 dipicolinate synthase subunit B                                      | 197    | 204    | 205    | 238    | 49     | 59     | 41     | 49     | 158    | 159    | 226    | 194    |
| K06412 stage V sporulation protein G                                        | 233    | 256    | 237    | 262    | 110    | 96     | 105    | 81     | 144    | 167    | 218    | 178    |
| K06413 stage V sporulation protein K                                        | 0      | 0      | 0      | 0      | 0      | 0      | 0      | 0      | 0      | 1      | 0      | 0      |
| K06415 stage V sporulation protein R                                        | 30     |        |        |        |        |        |        |        |        |        |        |        |

|                                                                                                                  |       |       |       |       |       |       |       |       |       |       |       |       |
|------------------------------------------------------------------------------------------------------------------|-------|-------|-------|-------|-------|-------|-------|-------|-------|-------|-------|-------|
| K07335 basic membrane protein A and related proteins                                                             | 1860  | 1729  | 1839  | 1820  | 709   | 733   | 644   | 635   | 1445  | 1601  | 1582  | 1516  |
| K07337 penicillin-binding protein activator                                                                      | 304   | 290   | 303   | 316   | 197   | 238   | 200   | 267   | 406   | 418   | 358   | 423   |
| K07343 DNA transformation protein and related proteins                                                           | 454   | 433   | 435   | 462   | 282   | 296   | 302   | 269   | 589   | 611   | 550   | 544   |
| K08086 pilus assembly protein FimV                                                                               | 474   | 488   | 435   | 432   | 263   | 274   | 215   | 253   | 193   | 170   | 177   | 173   |
| K08087 fimbrial protein FimW                                                                                     | 0     | 0     | 0     | 0     | 0     | 2     | 2     | 2     | 1     | 0     | 0     | 0     |
| K15540 chaperone protein EcpD                                                                                    | 882   | 901   | 868   | 859   | 951   | 990   | 994   | 984   | 650   | 644   | 639   | 667   |
| K15723 SecY interacting protein Syd                                                                              | 312   | 295   | 260   | 289   | 230   | 211   | 261   | 231   | 348   | 332   | 321   | 370   |
| K22720 surface composition regulator                                                                             | 109   | 151   | 121   | 135   | 102   | 105   | 116   | 92    | 178   | 177   | 127   | 162   |
| ko99995 Signaling proteins                                                                                       | 38993 | 38110 | 38088 | 38920 | 30353 | 30602 | 30246 | 30102 | 32205 | 32468 | 32201 | 33127 |
| K03607 ProP effector                                                                                             | 513   | 461   | 466   | 521   | 259   | 342   | 284   | 282   | 439   | 469   | 440   | 488   |
| K03807 AmpE protein                                                                                              | 1961  | 1924  | 1860  | 1857  | 1043  | 1095  | 1120  | 1090  | 1138  | 1089  | 1140  | 1254  |
| K05791 tellurium resistance protein TerZ                                                                         | 9     | 5     | 4     | 7     | 3     | 5     | 1     | 3     | 0     | 0     | 0     | 1     |
| K05792 tellurite resistance protein TerA                                                                         | 0     | 0     | 0     | 0     | 0     | 1     | 3     | 3     | 2     | 0     | 0     | 1     |
| K05795 tellurium resistance protein TerD                                                                         | 4     | 4     | 12    | 6     | 47    | 35    | 51    | 35    | 1     | 1     | 2     | 0     |
| K06149 universal stress protein A                                                                                | 923   | 826   | 961   | 954   | 527   | 656   | 568   | 539   | 574   | 548   | 606   | 559   |
| K06200 carbon starvation protein                                                                                 | 6063  | 5852  | 5753  | 5863  | 3291  | 3241  | 3277  | 3396  | 3986  | 3996  | 4005  | 4130  |
| K06207 GTP-binding protein                                                                                       | 6026  | 6126  | 6272  | 6245  | 7201  | 7211  | 7165  | 6793  | 6744  | 6871  | 7093  | 6948  |
| K06217 phosphate starvation-inducible protein PhoH and related proteins                                          | 4141  | 4035  | 4046  | 4045  | 3983  | 4084  | 3992  | 3952  | 4164  | 4152  | 4159  | 4200  |
| K06875 programmed cell death protein 5                                                                           | 0     | 0     | 0     | 1     | 1     | 0     | 0     | 0     | 0     | 0     | 1     | 1     |
| K07166 ACT domain-containing protein                                                                             | 184   | 131   | 163   | 145   | 47    | 60    | 42    | 43    | 142   | 217   | 166   | 180   |
| K07167 putative transcriptional regulator                                                                        | 0     | 1     | 0     | 0     | 0     | 0     | 0     | 0     | 0     | 2     | 4     | 0     |
| K07168 CBS domain-containing membrane protein                                                                    | 1851  | 1822  | 1713  | 1821  | 910   | 936   | 883   | 903   | 1087  | 974   | 922   | 1088  |
| K07169 FHA domain-containing protein                                                                             | 345   | 316   | 292   | 335   | 484   | 555   | 526   | 470   | 0     | 2     | 0     | 0     |
| K07175 PhoH-like ATPase                                                                                          | 2388  | 2385  | 2391  | 2450  | 3515  | 3369  | 3430  | 3512  | 2674  | 2624  | 2659  | 2642  |
| K07180 serine protein kinase                                                                                     | 3751  | 3493  | 3811  | 3952  | 2267  | 2278  | 2234  | 2294  | 2407  | 2413  | 2358  | 2366  |
| K07182 CBS domain-containing protein                                                                             | 2864  | 2895  | 2684  | 2751  | 1547  | 1377  | 1467  | 1485  | 873   | 823   | 823   | 864   |
| K07184 SH3 domain protein                                                                                        | 1234  | 1128  | 1195  | 1117  | 728   | 719   | 721   | 751   | 694   | 723   | 649   | 706   |
| K07186 membrane protein                                                                                          | 366   | 342   | 369   | 390   | 284   | 286   | 278   | 263   | 466   | 542   | 529   | 647   |
| K07212 GGDEF domain                                                                                              | 7     | 6     | 6     | 9     | 0     | 0     | 0     | 0     | 4     | 4     | 6     | 5     |
| K09767 cyclic-di-GMP-binding protein                                                                             | 1093  | 1175  | 1105  | 1148  | 661   | 602   | 623   | 621   | 744   | 778   | 730   | 827   |
| K11932 universal stress protein G                                                                                | 539   | 512   | 481   | 536   | 288   | 330   | 261   | 303   | 862   | 960   | 891   | 911   |
| K13630 multiple antibiotic resistance protein MarB                                                               | 122   | 104   | 90    | 118   | 67    | 80    | 72    | 72    | 156   | 181   | 115   | 150   |
| K14055 universal stress protein E                                                                                | 1593  | 1492  | 1460  | 1486  | 948   | 965   | 881   | 936   | 1019  | 976   | 941   | 974   |
| K14061 universal stress protein F                                                                                | 253   | 238   | 190   | 245   | 159   | 152   | 171   | 157   | 300   | 289   | 281   | 292   |
| K14064 universal stress protein C                                                                                | 233   | 243   | 264   | 285   | 167   | 181   | 158   | 181   | 407   | 402   | 440   | 378   |
| K14065 universal stress protein D                                                                                | 2     | 1     | 2     | 2     | 3     | 2     | 9     | 4     | 31    | 28    | 26    | 39    |
| K19336 cyclic-di-GMP-binding biofilm dispersal mediator protein                                                  | 271   | 279   | 224   | 270   | 68    | 94    | 70    | 75    | 529   | 569   | 541   | 549   |
| K21637 anti-adaptor protein IraD                                                                                 | 1     | 1     | 2     | 0     | 3     | 12    | 6     | 2     | 27    | 18    | 15    | 29    |
| K21638 anti-adaptor protein IraM                                                                                 | 111   | 127   | 96    | 128   | 43    | 32    | 40    | 36    | 206   | 247   | 241   | 257   |
| K21973 blue light- and temperature-responsive anti-repressor                                                     | 1281  | 1373  | 1297  | 1309  | 913   | 989   | 978   | 996   | 1703  | 1827  | 1708  | 1882  |
| K21974 probable RcsB/C two-component-system connector                                                            | 260   | 221   | 246   | 223   | 206   | 226   | 229   | 254   | 264   | 223   | 232   | 224   |
| K21975 probable RcsB/C two-component-system connector                                                            | 302   | 301   | 330   | 349   | 358   | 372   | 342   | 337   | 318   | 293   | 283   | 314   |
| K21976 probable RcsB/C two-component-system connector, global regulator of biofilm formation and acid-resistance | 302   | 291   | 313   | 352   | 332   | 315   | 364   | 334   | 242   | 227   | 195   | 221   |
| ko99992 Structural proteins                                                                                      | 50112 | 50621 | 50131 | 50748 | 65251 | 65764 | 65890 | 66423 | 57775 | 56668 | 57542 | 56604 |
| K01993 HlyD family secretion protein                                                                             | 4068  | 4114  | 4110  | 4006  | 6672  | 6846  | 7012  | 6995  | 6564  | 6174  | 6150  | 6292  |
| K02005 HlyD family secretion protein                                                                             | 3239  | 3547  | 3669  | 3415  | 7825  | 7915  | 7704  | 7896  | 5876  | 5582  | 6107  | 5677  |
| K02022 HlyD family secretion protein                                                                             | 7     | 12    | 4     | 19    | 0     | 2     | 2     | 3     | 7     | 8     | 3     | 4     |
| K02197 cytochrome c-type biogenesis protein CcmE                                                                 | 826   | 842   | 800   | 913   | 393   | 420   | 436   | 448   | 540   | 563   | 579   | 587   |
| K02200 cytochrome c-type biogenesis protein CcmH                                                                 | 2638  | 2614  | 2337  | 2404  | 1348  | 1314  | 1337  | 1683  | 1264  | 1186  | 1175  | 1201  |
| K02494 outer membrane lipoprotein LolB                                                                           | 1471  | 1396  | 1301  | 1438  | 842   | 849   | 794   | 836   | 758   | 792   | 781   | 832   |
| K02497 HemX protein                                                                                              | 1     | 0     | 0     | 0     | 0     | 0     | 0     | 0     | 0     | 0     | 0     | 0     |
| K03634 outer membrane lipoprotein carrier protein                                                                | 1189  | 1205  | 1162  | 1172  | 649   | 665   | 596   | 625   | 697   | 769   | 696   | 787   |
| K03642 rare lipoprotein A                                                                                        | 1956  | 1882  | 1878  | 1997  | 1173  | 1198  | 1085  | 1188  | 1195  | 1146  | 1129  | 1193  |
| K04062 osmotically inducible lipoprotein OsmB                                                                    | 100   | 85    | 86    | 96    | 73    | 87    | 65    | 95    | 144   | 130   | 114   | 128   |
| K04064 osmotically inducible lipoprotein OsmE                                                                    | 744   | 768   | 713   | 734   | 439   | 454   | 425   | 465   | 444   | 476   | 464   | 450   |
| K04754 phospholipid-binding lipoprotein MlaA                                                                     | 2299  | 2256  | 2364  | 2307  | 1442  | 1349  | 1401  | 1296  | 1286  | 1313  | 1267  | 1386  |
| K05790 polysaccharide biosynthesis protein WzzE                                                                  | 729   | 634   | 640   | 733   | 514   | 560   | 490   | 530   | 990   | 942   | 915   | 885   |
| K05803 lipoprotein NlpI                                                                                          | 555   | 539   | 498   | 570   | 408   | 458   | 416   | 405   | 728   | 744   | 758   | 732   |
| K06077 outer membrane lipoprotein SlyB                                                                           | 723   | 688   | 631   | 675   | 384   | 370   | 331   | 411   | 394   | 381   | 378   | 359   |
| K06142 outer membrane protein                                                                                    | 2185  | 2249  | 2265  | 2460  | 4500  | 4412  | 4234  | 4079  | 3277  | 3374  | 3235  | 3211  |
| K06143 inner membrane protein                                                                                    | 3610  | 3693  | 3747  | 3633  | 4036  | 3886  | 4180  | 4077  | 3438  | 3348  | 3473  | 3370  |
| K06194 lipoprotein NlpD                                                                                          | 1730  | 1645  | 1652  | 1723  | 1014  | 1160  | 1127  | 1217  | 1155  | 1196  | 1112  | 1114  |
| K07265 capsular polysaccharide export protein                                                                    | 240   | 252   | 266   | 278   | 436   | 516   | 345   | 414   | 71    | 57    | 41    | 52    |
| K07266 capsular polysaccharide export protein                                                                    | 459   | 456   | 481   | 465   | 617   | 765   | 708   | 622   | 68    | 81    | 75    | 90    |
| K07273 lysozyme                                                                                                  | 704   | 727   | 736   | 747   | 1930  | 1920  | 2065  | 1927  | 1585  | 1527  | 1580  | 1609  |
| K07275 outer membrane protein                                                                                    | 616   | 542   | 519   | 595   | 402   | 370   | 355   | 349   | 604   | 550   | 524   | 568   |
| K07282 gamma-polyglutamate biosynthesis protein CapA                                                             | 0     | 0     | 0     | 0     | 0     | 0     | 0     | 0     | 1     | 0     | 0     | 0     |
| K07283 putative salt-induced outer membrane protein                                                              | 351   | 406   | 457   | 438   | 337   | 319   | 303   | 273   | 530   | 553   | 487   | 589   |
| K07285 outer membrane lipoprotein                                                                                | 293   | 359   | 357   | 321   | 224   | 286   | 246   | 254   | 460   | 508   | 495   | 558   |
| K07286 uncharacterized lipoprotein                                                                               | 384   | 410   | 424   | 388   | 265   | 301   | 296   | 274   | 573   | 512   | 566   | 556   |
| K07289 AsmA protein                                                                                              | 4345  | 4371  | 4273  | 4353  | 2682  | 2649  | 2653  | 2824  | 2617  | 2651  | 2578  | 2651  |
| K07290 AsmA family protein                                                                                       | 4582  | 4537  | 4297  | 4701  | 2768  | 2800  | 2764  | 2952  | 2818  | 2772  | 2781  | 2816  |
| K07340 inner membrane protein                                                                                    | 1051  | 1037  | 876   | 987   | 643   | 581   | 588   | 567   | 512   | 534   | 571   | 514   |
| K11744 Al-2 transport protein TqA                                                                                | 357   | 372   | 361   | 353   | 132   | 116   | 118   | 137   | 778   | 769   | 760   | 829   |
| K13643 lipoprotein YgeR                                                                                          | 976   | 975   | 884   | 955   | 581   | 651   | 543   | 603   | 804   | 705   | 769   | 774   |
| K13665 pyruvyltransferase                                                                                        | 0     | 0     | 0     | 0     | 0     | 0     | 0     | 0     | 0     | 0     | 0     | 0     |
| K15539 cytoskeleton protein RodZ                                                                                 | 1522  | 1413  | 1424  | 1601  | 920   | 903   | 1009  | 1011  | 870   | 904   | 774   | 933   |
| K19061 macrolide resistance protein                                                                              | 0     | 0     | 0     | 0     | 3     | 1     | 0     | 3     | 1     | 0     | 3     | 0     |
| K19525 vacuolar protein sorting-associated protein 13A/C                                                         | 0     | 0     | 0     | 0     | 0     | 0     | 0     | 0     | 0     | 2     | 1     | 0     |
| K21571 starch-binding outer membrane protein SusE/F                                                              | 5804  | 6228  | 6844  | 6136  | 21425 | 21440 | 22049 | 21602 | 16075 | 15701 | 16460 | 15149 |
| K21695 protein AaeX                                                                                              | 134   | 134   | 151   | 124   | 101   | 122   | 123   | 102   | 176   | 256   | 239   | 200   |
| K21908 membrane protein HdeD                                                                                     | 221   | 227   | 216   | 203   | 73    | 79    | 90    | 58    | 475   | 462   | 502   | 508   |
| K22116 gamma-polyglutamate biosynthesis protein CapC                                                             | 3     | 2     | 1     | 2     | 0     | 0     | 0     | 1     | 0     | 0     | 0     | 0     |
| ko99994 Others                                                                                                   | 26899 | 26847 | 26169 | 26270 | 18478 | 18344 | 18317 | 18616 | 17515 | 17444 | 17123 | 17624 |
| K02039 phosphate transport system protein                                                                        | 2262  | 2331  | 2315  | 2307  | 2363  | 2348  | 2459  | 2373  | 2513  | 2456  | 2518  | 2494  |
| K02192 bacterioferritin-associated ferredoxin                                                                    | 478   | 450   | 473   | 467   | 293   | 276   | 268   | 270   | 297   | 304   | 268   | 276   |
| K02255 ferritin-like protein 2                                                                                   | 280   | 259   | 274   | 241   | 197   | 177   | 197   | 180   | 410   | 464   | 412   | 415   |
| K03670 periplasmic glucans biosynthesis protein                                                                  | 858   | 822   | 853   | 857   | 600   | 679   | 602   | 559   | 1157  | 1266  | 1137  | 1298  |
| K03926 periplasmic divalent cation tolerance protein                                                             | 185   | 174   | 197   | 224   | 144   | 120   | 141   | 138   | 266   | 245   | 256   | 241   |
| K05781 putative phosphonate transport system ATP-binding protein                                                 | 1039  | 1026  | 915   | 1040  | 420   | 386   | 431   | 431   | 1053  | 1039  | 935   | 978   |
| K05794 tellurite resistance protein TerC                                                                         | 1400  | 1384  | 1395  | 1287  | 818   | 787   | 748   | 786   | 430   | 433   | 382   | 406   |
| K06039 uncharacterized protein involved in oxidation of intracellular sulfur                                     | 161   | 196   | 172   | 187   | 139   | 124   | 136   | 112   | 248   | 268   | 220   | 242   |
| K06195 ApaG protein                                                                                              | 823   | 677   | 796   | 815   | 482   | 551   | 517   | 517   | 469   | 523   | 483   | 461   |
| K06201 copper homeostasis protein                                                                                | 1104  | 1116  | 998   | 1071  | 1671  | 1698  | 1760  | 1718  | 1698  | 1611  | 1865  | 1662  |
| K06202 CyaY protein                                                                                              | 600   | 695   | 600   | 590   | 409   | 418   | 421   | 421   | 420   | 428   | 450   | 503   |
| K07214 enterochelin esterase and related enzymes                                                                 | 1910  | 1905  | 1857  | 1960  | 1709  | 1746  | 1687  | 1770  | 2175  | 2287  | 2276  | 2434  |
| K07216 hemerythrin                                                                                               | 626   | 642   | 676   | 606   | 338   | 308   | 337   | 340   | 262   | 289   | 283   | 238   |
| K07217 Mn-containing catalase                                                                                    | 463   | 520   | 545   | 510   | 354   | 372   | 395   | 340   | 744   | 780   | 737   | 729   |
| K07218 nitrous oxidase accessory protein                                                                         | 1827  | 1714  | 1758  | 1564  | 961   | 865   | 773   | 911   | 624   | 543   | 537   | 478   |
| K07219 putative molybdopterin biosynthesis protein                                                               | 0     | 0     | 2     | 0     | 3     | 2     | 5     | 2     | 0     | 4     | 0     | 4     |
| K07222 putative flavoprotein involved in K+ transport                                                            | 2279  | 2366  | 2180  | 2135  | 1466  | 1474  | 1353  | 1514  | 709   | 694   | 607   | 692   |
| K07225 putative hemein transport protein                                                                         | 2322  | 2358  | 2153  | 2288  | 1378  | 1279  | 1301  | 1293  | 1427  | 1395  | 1317  | 1476  |
| K07226 heme iron utilization protein                                                                             | 1199  | 1151  | 1215  | 1165  | 648   | 714   | 652   | 678   | 358   | 338   | 372   | 409   |
| K07227 heme iron utilization protein                                                                             | 8     | 5     | 5     | 7     | 14    | 7     | 10    | 11    | 42    | 55    | 45    | 43    |
| K07231 putative iron-regulated protein                                                                           | 1967  | 2007  | 1901  | 1973  | 1091  | 1110  | 1206  | 1155  | 683   | 654   | 589   | 633   |
| K07233 copper resistance protein B                                                                               | 2608  | 2645  | 2695  | 2725  | 173   |       |       |       |       |       |       |       |

|                                                           |        |        |        |        |        |        |        |        |        |        |        |        |
|-----------------------------------------------------------|--------|--------|--------|--------|--------|--------|--------|--------|--------|--------|--------|--------|
| K02742 SprT protein                                       | 1159   | 1083   | 1038   | 1093   | 657    | 666    | 653    | 607    | 594    | 695    | 728    | 696    |
| K03095 SprT-like protein                                  | 23     | 16     | 34     | 27     | 6      | 3      | 11     | 5      | 31     | 28     | 38     | 30     |
| K03112 DamX protein                                       | 2064   | 2084   | 1929   | 2085   | 1264   | 1245   | 1323   | 1379   | 991    | 935    | 994    | 1017   |
| K03558 membrane protein required for colicin V production | 1241   | 1357   | 1209   | 1261   | 1629   | 1792   | 1354   | 1346   | 1262   | 1240   | 1155   | 1183   |
| K03618 hydrogenase-1 operon protein HyaF                  | 21     | 30     | 38     | 32     | 39     | 45     | 64     | 63     | 108    | 87     | 108    | 78     |
| K03619 hydrogenase-1 operon protein HyaE                  | 8      | 9      | 21     | 12     | 24     | 36     | 20     | 11     | 40     | 42     | 34     | 26     |
| K03744 LemA protein                                       | 1475   | 1498   | 1458   | 1544   | 2529   | 2508   | 2683   | 2529   | 2197   | 2080   | 2309   | 2106   |
| K03745 SlyX protein                                       | 436    | 444    | 410    | 453    | 258    | 234    | 273    | 257    | 247    | 287    | 272    | 325    |
| K03747 Smg protein                                        | 298    | 274    | 284    | 277    | 178    | 220    | 185    | 239    | 360    | 401    | 413    | 412    |
| K03748 SaaA protein                                       | 356    | 385    | 326    | 423    | 278    | 255    | 241    | 258    | 509    | 654    | 536    | 554    |
| K03749 DeaD protein                                       | 783    | 787    | 782    | 734    | 429    | 484    | 518    | 543    | 593    | 604    | 533    | 565    |
| K03791 putative chitinase                                 | 1389   | 1443   | 1487   | 1491   | 927    | 853    | 916    | 876    | 462    | 393    | 441    | 407    |
| K03796 Bax protein                                        | 492    | 516    | 449    | 517    | 403    | 404    | 366    | 378    | 700    | 804    | 664    | 715    |
| K03808 paraquat-inducible protein A                       | 3258   | 3194   | 3157   | 3409   | 2140   | 2151   | 1888   | 2090   | 2472   | 2610   | 2456   | 2615   |
| K03810 virulence factor                                   | 549    | 576    | 519    | 567    | 373    | 323    | 389    | 330    | 741    | 789    | 716    | 778    |
| K03923 modulator of drug activity B                       | 1244   | 1125   | 1124   | 1214   | 709    | 729    | 784    | 741    | 735    | 707    | 691    | 710    |
| K03925 MraZ protein                                       | 1698   | 1663   | 1665   | 1643   | 1808   | 1878   | 1803   | 1779   | 1782   | 1740   | 1793   | 1710   |
| K03931 putative isomerase                                 | 637    | 646    | 654    | 664    | 767    | 783    | 840    | 796    | 360    | 486    | 437    | 415    |
| K03933 chitin-binding protein                             | 1810   | 1668   | 1657   | 1658   | 992    | 935    | 899    | 935    | 610    | 540    | 471    | 546    |
| K03975 membrane-associated protein                        | 1920   | 1748   | 1879   | 1779   | 2261   | 2225   | 2164   | 2265   | 1820   | 1764   | 1872   | 1879   |
| K04065 hypersmotically inducible periplasmic protein      | 900    | 930    | 868    | 855    | 542    | 595    | 567    | 572    | 678    | 691    | 742    | 678    |
| K04477 putative hydrolase                                 | 991    | 943    | 1037   | 1049   | 570    | 618    | 640    | 569    | 1056   | 1194   | 1013   | 993    |
| K04750 PhnB protein                                       | 1675   | 1709   | 1601   | 1577   | 715    | 620    | 618    | 736    | 1050   | 1171   | 1103   | 1185   |
| K04756 alkyl hydroperoxide reductase subunit D            | 0      | 2      | 0      | 0      | 0      | 0      | 0      | 0      | 0      | 2      | 0      | 2      |
| K05594 ElaB protein                                       | 46     | 74     | 56     | 56     | 81     | 98     | 78     | 96     | 14     | 21     | 16     | 14     |
| K05775 maltose operon periplasmic protein                 | 452    | 531    | 544    | 560    | 413    | 388    | 374    | 355    | 725    | 711    | 662    | 697    |
| K05805 Crea protein                                       | 718    | 660    | 696    | 695    | 424    | 534    | 433    | 465    | 597    | 585    | 617    | 593    |
| K05811 putative lipoprotein                               | 799    | 698    | 702    | 732    | 470    | 444    | 375    | 444    | 433    | 471    | 399    | 473    |
| K05812 DTW domain-containing protein                      | 2110   | 2001   | 1878   | 2008   | 1126   | 1163   | 1053   | 1229   | 1072   | 1092   | 1081   | 1060   |
| K05997 Fe-S cluster assembly protein SufA                 | 197    | 197    | 169    | 201    | 121    | 156    | 140    | 118    | 306    | 301    | 276    | 281    |
| K06135 pyrroloquinoline quinone biosynthesis protein A    | 244    | 210    | 195    | 185    | 90     | 102    | 116    | 119    | 107    | 129    | 104    | 108    |
| K06136 pyrroloquinoline quinone biosynthesis protein B    | 1697   | 1637   | 1504   | 1541   | 824    | 741    | 725    | 815    | 1046   | 980    | 990    | 1162   |
| K06138 pyrroloquinoline quinone biosynthesis protein D    | 255    | 272    | 266    | 239    | 106    | 114    | 110    | 109    | 244    | 258    | 214    | 231    |
| K06192 paraquat-inducible protein B                       | 4639   | 4636   | 4686   | 4693   | 2797   | 2775   | 2701   | 2685   | 2472   | 2549   | 2346   | 2320   |
| K06193 protein PhnA                                       | 864    | 799    | 823    | 907    | 575    | 573    | 538    | 477    | 530    | 589    | 533    | 614    |
| K06197 cation transport regulator                         | 132    | 127    | 111    | 146    | 78     | 85     | 82     | 100    | 206    | 179    | 199    | 224    |
| K06198 competence protein CoiA                            | 53     | 68     | 72     | 66     | 8      | 16     | 12     | 22     | 83     | 71     | 77     | 93     |
| K06865 ATPase                                             | 0      | 0      | 0      | 1      | 3      | 5      | 1      | 2      | 7      | 22     | 7      | 12     |
| K06866 autonomous glycol radical cofactor                 | 227    | 231    | 204    | 212    | 204    | 178    | 172    | 163    | 308    | 327    | 317    | 312    |
| K06874 zinc finger protein                                | 0      | 0      | 0      | 1      | 0      | 0      | 0      | 0      | 4      | 4      | 4      | 5      |
| K06877 DEAD/DEAH box helicase domain-containing protein   | 886    | 931    | 883    | 858    | 160    | 162    | 193    | 155    | 902    | 1019   | 918    | 955    |
| K06878 tRNA-binding protein                               | 555    | 538    | 533    | 487    | 289    | 380    | 242    | 255    | 226    | 223    | 245    | 179    |
| K06886 hemoglobin                                         | 6      | 11     | 10     | 10     | 20     | 18     | 13     | 13     | 8      | 13     | 14     | 14     |
| K06994 putative drug exporter of the RND superfamily      | 8      | 2      | 1      | 9      | 6      | 6      | 2      | 5      | 4      | 7      | 6      | 8      |
| K07001 NTE family protein                                 | 6584   | 6813   | 6893   | 6772   | 12020  | 12028  | 12229  | 11579  | 9088   | 8913   | 9215   | 9016   |
| K07023 putative hydrolases of HD superfamily              | 1226   | 1136   | 1101   | 1146   | 546    | 534    | 456    | 460    | 736    | 720    | 783    | 760    |
| K07025 putative hydrolase of the HAD superfamily          | 1324   | 1493   | 1579   | 1549   | 3336   | 3424   | 3383   | 3384   | 2852   | 2734   | 2790   | 2778   |
| K07038 inner membrane protein                             | 1179   | 1228   | 1176   | 1224   | 817    | 872    | 840    | 877    | 730    | 732    | 839    | 753    |
| K07048 phosphotriesterase-related protein                 | 351    | 342    | 326    | 330    | 114    | 113    | 145    | 139    | 888    | 1020   | 982    | 1068   |
| K07049 TatD-related deoxyribonuclease                     | 0      | 0      | 2      | 0      | 0      | 2      | 0      | 0      | 0      | 0      | 0      | 0      |
| K07058 membrane protein                                   | 5215   | 5483   | 5440   | 5539   | 5226   | 5470   | 5380   | 5224   | 4915   | 4694   | 4739   | 4707   |
| K07082 UPF0755 protein                                    | 3131   | 3188   | 3112   | 3198   | 3383   | 3299   | 3366   | 3320   | 3068   | 3022   | 3131   | 3120   |
| K07100 putative phosphoribosyl transferase                | 2      | 0      | 0      | 0      | 0      | 1      | 0      | 0      | 0      | 0      | 6      | 0      |
| K07113 UPF0716 protein FxsA                               | 1176   | 1083   | 1088   | 1127   | 735    | 776    | 699    | 648    | 606    | 638    | 566    | 621    |
| K07146 UPF0176 protein                                    | 1961   | 2001   | 1976   | 2029   | 1178   | 1194   | 1090   | 1031   | 1305   | 1335   | 1217   | 1318   |
| K07153 high frequency lysogenization protein              | 1266   | 1250   | 1145   | 1312   | 782    | 707    | 786    | 735    | 820    | 787    | 795    | 755    |
| K08276 ecotin                                             | 404    | 400    | 376    | 424    | 189    | 179    | 167    | 171    | 440    | 471    | 405    | 481    |
| K08279 carnitine operon protein CalE                      | 118    | 116    | 125    | 144    | 192    | 181    | 153    | 152    | 30     | 47     | 32     | 49     |
| K08971 putative membrane protein                          | 0      | 0      | 0      | 0      | 3      | 0      | 1      | 1      | 1      | 11     | 3      | 9      |
| K08972 putative membrane protein                          | 16     | 11     | 13     | 17     | 6      | 7      | 13     | 17     | 33     | 17     | 26     | 29     |
| K08973 putative membrane protein                          | 662    | 692    | 747    | 724    | 412    | 362    | 413    | 416    | 256    | 216    | 196    | 239    |
| K08974 putative membrane protein                          | 443    | 424    | 459    | 353    | 120    | 124    | 162    | 134    | 400    | 452    | 362    | 456    |
| K08976 putative membrane protein                          | 2      | 0      | 0      | 0      | 0      | 0      | 0      | 0      | 0      | 0      | 0      | 0      |
| K08979 putative membrane protein                          | 0      | 0      | 0      | 1      | 0      | 2      | 0      | 2      | 13     | 12     | 7      | 0      |
| K08981 putative membrane protein                          | 18     | 19     | 9      | 14     | 18     | 7      | 8      | 10     | 21     | 25     | 29     | 28     |
| K08982 putative membrane protein                          | 0      | 0      | 1      | 1      | 0      | 1      | 0      | 0      | 0      | 0      | 1      | 3      |
| K08983 putative membrane protein                          | 688    | 694    | 586    | 653    | 397    | 398    | 362    | 403    | 205    | 211    | 171    | 221    |
| K08984 putative membrane protein                          | 3      | 3      | 3      | 1      | 14     | 8      | 8      | 9      | 40     | 50     | 31     | 39     |
| K08985 putative lipoprotein                               | 676    | 669    | 705    | 696    | 378    | 367    | 304    | 385    | 234    | 194    | 187    | 201    |
| K08986 putative membrane protein                          | 313    | 311    | 305    | 288    | 51     | 49     | 60     | 31     | 195    | 202    | 248    | 253    |
| K08987 putative membrane protein                          | 162    | 160    | 174    | 169    | 101    | 120    | 107    | 126    | 165    | 171    | 177    | 177    |
| K08988 putative membrane protein                          | 0      | 0      | 0      | 0      | 3      | 0      | 0      | 0      | 1      | 4      | 3      | 1      |
| K08989 putative membrane protein                          | 95     | 73     | 89     | 101    | 120    | 124    | 105    | 128    | 24     | 37     | 36     | 16     |
| K08990 putative membrane protein                          | 605    | 570    | 491    | 594    | 328    | 395    | 389    | 384    | 838    | 827    | 828    | 901    |
| K08993 putative membrane protein                          | 606    | 590    | 519    | 567    | 338    | 318    | 276    | 349    | 400    | 337    | 378    | 409    |
| K08995 putative membrane protein                          | 79     | 96     | 102    | 106    | 55     | 59     | 61     | 54     | 49     | 21     | 25     | 42     |
| K09014 Fe-S cluster assembly protein SufB                 | 4      | 3      | 0      | 3      | 9      | 16     | 14     | 3      | 29     | 30     | 41     | 35     |
| K09015 Fe-S cluster assembly protein SufD                 | 1995   | 2364   | 2212   | 2199   | 4223   | 4345   | 4187   | 4201   | 3971   | 4212   | 4037   | 3922   |
| K09858 SEC-C motif domain protein                         | 1659   | 1815   | 1875   | 1744   | 3837   | 3678   | 3737   | 3703   | 3412   | 3262   | 3336   | 3216   |
| K09914 putative lipoprotein                               | 1021   | 970    | 960    | 968    | 568    | 586    | 551    | 582    | 597    | 633    | 526    | 633    |
| K11312 cupin 2 domain-containing protein                  | 928    | 855    | 868    | 883    | 529    | 505    | 514    | 579    | 628    | 628    | 559    | 630    |
| K11477 glc operon protein GlcG                            | 0      | 1      | 1      | 3      | 0      | 3      | 6      | 4      | 1      | 0      | 0      | 0      |
| K11739 bacteriophage N4 adsorption protein A              | 530    | 537    | 581    | 556    | 318    | 271    | 282    | 335    | 235    | 206    | 214    | 203    |
| K11740 bacteriophage N4 adsorption protein B              | 7      | 8      | 17     | 10     | 41     | 36     | 33     | 31     | 174    | 163    | 167    | 157    |
| K11811 arsenical resistance protein ArsH                  | 17     | 18     | 14     | 23     | 46     | 27     | 20     | 23     | 157    | 165    | 153    | 125    |
| K12147 acidic protein MsyB                                | 1093   | 1123   | 1004   | 1099   | 743    | 725    | 682    | 769    | 301    | 269    | 278    | 298    |
| K13255 ferric iron reductase protein FhuF                 | 225    | 245    | 200    | 217    | 164    | 167    | 166    | 135    | 323    | 418    | 306    | 298    |
| K13256 protein PsiE                                       | 502    | 516    | 510    | 538    | 340    | 330    | 354    | 366    | 692    | 709    | 659    | 704    |
| K13918 glucarate dehydratase-related protein              | 253    | 289    | 276    | 276    | 227    | 215    | 177    | 219    | 374    | 412    | 364    | 361    |
| K14591 protein AroM                                       | 860    | 859    | 792    | 847    | 566    | 614    | 554    | 590    | 1091   | 1137   | 1163   | 1232   |
| K15640 uncharacterized phosphatase                        | 508    | 462    | 429    | 520    | 297    | 368    | 368    | 267    | 650    | 731    | 680    | 733    |
| K15724 iron-sulfur cluster insertion protein              | 8      | 5      | 6      | 5      | 2      | 0      | 0      | 2      | 61     | 73     | 56     | 74     |
| K21740 reactive chlorine resistance protein B             | 764    | 855    | 739    | 764    | 443    | 517    | 469    | 455    | 481    | 515    | 455    | 543    |
| K21741 reactive chlorine resistance protein C             | 1      | 0      | 0      | 0      | 1      | 2      | 3      | 2      | 11     | 10     | 11     | 14     |
| K21832 glycine betaine catabolism B                       | 5      | 2      | 0      | 6      | 10     | 16     | 3      | 8      | 32     | 34     | 37     | 32     |
| K21833 dimethylglycine catabolism A                       | 1727   | 1682   | 1579   | 1531   | 973    | 814    | 860    | 912    | 537    | 571    | 495    | 501    |
| K21834 dimethylglycine catabolism B                       | 1775   | 1832   | 1682   | 1813   | 931    | 935    | 885    | 1001   | 615    | 555    | 528    | 545    |
| ko99997 Function unknown                                  | 3510   | 3266   | 3198   | 3267   | 2006   | 1821   | 1662   | 1959   | 1090   | 1123   | 955    | 1050   |
| K00243 uncharacterized protein                            | 300763 | 300622 | 297227 | 301288 | 278248 | 279317 | 276287 | 279224 | 264272 | 263648 | 263203 | 264283 |
| K01163 uncharacterized protein                            | 1483   | 1516   | 1448   | 1528   | 2142   | 2226   | 2340   | 2258   | 1980   | 1965   | 1912   | 1853   |
| K05937 uncharacterized protein                            | 1441   | 1417   | 1491   | 1448   | 2236   | 2242   | 2396   | 2175   | 2108   | 2064   | 2123   | 1951   |
| K05952 uncharacterized protein                            | 3      | 4      | 3      | 7      | 2      | 2      | 1      | 2      | 4      | 18     | 2      | 4      |
| K05967 uncharacterized protein                            | 390    | 424    | 386    | 389    | 224    | 189    | 209    | 180    | 226    | 214    | 254    | 241    |
| K06867 uncharacterized protein                            | 1      | 1      | 0      | 1      | 0      | 0      | 0      | 0      | 0      | 0      | 0      | 0      |
| K06871 uncharacterized protein                            | 2371   | 2528   | 2373   | 2547   | 1431   | 1361   | 867    | 932    | 873    | 884    | 815    | 849    |
| K06872 uncharacterized protein                            | 3560   | 3440   | 3696   | 3687   | 3519   | 3558   | 3735   | 3478   | 6026   | 6306   | 6190   | 6409   |
| K06873 uncharacterized protein                            | 3978   | 3724   | 3738   | 3857   | 3261   | 3292   | 3076   | 3355   | 2593   | 2499   | 2479   | 2454   |
| K06883 uncharacterized protein                            | 0      | 0      | 0      | 3      | 0      | 0      | 0      | 0      | 0      | 0      | 0      | 2      |
| K06884 un                                                 |        |        |        |        |        |        |        |        |        |        |        |        |

|                                |       |       |       |       |       |       |       |       |       |       |       |       |
|--------------------------------|-------|-------|-------|-------|-------|-------|-------|-------|-------|-------|-------|-------|
| K06908 uncharacterized protein | 511   | 509   | 476   | 490   | 269   | 228   | 243   | 270   | 736   | 725   | 731   | 735   |
| K06910 uncharacterized protein | 850   | 867   | 786   | 836   | 625   | 640   | 617   | 642   | 1028  | 1079  | 1072  | 1178  |
| K06911 uncharacterized protein | 5847  | 5767  | 5670  | 5838  | 4365  | 4418  | 4279  | 4440  | 4522  | 4534  | 4368  | 4584  |
| K06913 uncharacterized protein | 0     | 2     | 0     | 0     | 0     | 2     | 0     | 2     | 8     | 8     | 1     | 11    |
| K06915 uncharacterized protein | 3344  | 3307  | 3187  | 3348  | 2009  | 1963  | 1911  | 1900  | 2261  | 2307  | 2248  | 2375  |
| K06918 uncharacterized protein | 567   | 480   | 481   | 526   | 500   | 551   | 407   | 432   | 643   | 637   | 597   | 603   |
| K06921 uncharacterized protein | 1733  | 1838  | 2036  | 1892  | 4446  | 4323  | 4594  | 4431  | 3663  | 3659  | 3855  | 3772  |
| K06923 uncharacterized protein | 1928  | 1927  | 1873  | 1917  | 797   | 869   | 700   | 828   | 957   | 1026  | 1047  | 959   |
| K06926 uncharacterized protein | 452   | 525   | 529   | 519   | 1338  | 1338  | 1423  | 1347  | 1173  | 1045  | 1144  | 1205  |
| K06929 uncharacterized protein | 254   | 249   | 238   | 227   | 150   | 201   | 163   | 146   | 295   | 384   | 343   | 344   |
| K06933 uncharacterized protein | 1     | 1     | 1     | 0     | 0     | 0     | 0     | 0     | 5     | 4     | 1     | 5     |
| K06934 uncharacterized protein | 87    | 72    | 60    | 56    | 13    | 16    | 10    | 20    | 200   | 177   | 162   | 235   |
| K06936 uncharacterized protein | 2     | 2     | 2     | 1     | 0     | 0     | 3     | 0     | 5     | 4     | 2     | 1     |
| K06938 uncharacterized protein | 1185  | 1132  | 1051  | 1104  | 629   | 628   | 602   | 629   | 500   | 509   | 484   | 489   |
| K06940 uncharacterized protein | 2704  | 2566  | 2445  | 2458  | 1359  | 1397  | 1297  | 1569  | 1475  | 1485  | 1411  | 1543  |
| K06944 uncharacterized protein | 0     | 0     | 0     | 0     | 2     | 1     | 0     | 3     | 0     | 7     | 7     | 10    |
| K06946 uncharacterized protein | 6     | 5     | 4     | 6     | 22    | 25    | 19    | 30    | 76    | 88    | 103   | 108   |
| K06950 uncharacterized protein | 1887  | 1934  | 2096  | 2064  | 2969  | 3024  | 3148  | 3049  | 2740  | 2931  | 2952  | 2906  |
| K06951 uncharacterized protein | 1     | 4     | 5     | 9     | 3     | 2     | 1     | 1     | 4     | 4     | 4     | 6     |
| K06952 uncharacterized protein | 3     | 0     | 0     | 3     | 3     | 7     | 5     | 0     | 20    | 31    | 39    | 49    |
| K06953 uncharacterized protein | 0     | 0     | 2     | 0     | 0     | 0     | 0     | 2     | 3     | 0     | 3     | 1     |
| K06954 uncharacterized protein | 477   | 435   | 386   | 423   | 158   | 155   | 184   | 188   | 741   | 774   | 739   | 775   |
| K06955 uncharacterized protein | 1047  | 1029  | 900   | 975   | 580   | 578   | 510   | 639   | 338   | 288   | 295   | 281   |
| K06956 uncharacterized protein | 937   | 901   | 902   | 936   | 602   | 606   | 635   | 568   | 1120  | 1276  | 1238  | 1283  |
| K06960 uncharacterized protein | 148   | 160   | 147   | 123   | 51    | 51    | 52    | 43    | 146   | 181   | 142   | 188   |
| K06962 uncharacterized protein | 71    | 46    | 62    | 69    | 14    | 14    | 24    | 116   | 127   | 107   | 136   | 136   |
| K06971 uncharacterized protein | 763   | 798   | 762   | 745   | 425   | 416   | 447   | 420   | 813   | 916   | 917   | 935   |
| K06973 uncharacterized protein | 790   | 854   | 911   | 894   | 1513  | 1432  | 1685  | 1535  | 1359  | 1432  | 1433  | 1431  |
| K06975 uncharacterized protein | 1069  | 1058  | 1107  | 1110  | 1616  | 1594  | 1558  | 1644  | 1353  | 1328  | 1447  | 1276  |
| K06976 uncharacterized protein | 98    | 103   | 80    | 106   | 23    | 13    | 33    | 20    | 137   | 120   | 111   | 133   |
| K06977 uncharacterized protein | 0     | 0     | 1     | 0     | 0     | 0     | 0     | 0     | 0     | 0     | 0     | 0     |
| K06978 uncharacterized protein | 326   | 357   | 385   | 363   | 330   | 394   | 375   | 350   | 131   | 100   | 146   | 128   |
| K06986 uncharacterized protein | 706   | 700   | 749   | 728   | 481   | 379   | 404   | 423   | 287   | 246   | 243   | 227   |
| K06987 uncharacterized protein | 2541  | 2451  | 2387  | 2302  | 1178  | 1129  | 1059  | 1150  | 1299  | 1327  | 1316  | 1406  |
| K06991 uncharacterized protein | 687   | 740   | 646   | 706   | 383   | 412   | 349   | 383   | 206   | 201   | 183   | 232   |
| K06992 uncharacterized protein | 1687  | 1612  | 1542  | 1706  | 934   | 893   | 869   | 972   | 538   | 513   | 488   | 504   |
| K06995 uncharacterized protein | 2798  | 2641  | 2593  | 2526  | 1465  | 1348  | 1349  | 1473  | 931   | 969   | 885   | 987   |
| K06996 uncharacterized protein | 955   | 920   | 968   | 1051  | 1179  | 1195  | 1226  | 1171  | 1036  | 942   | 962   | 963   |
| K07000 uncharacterized protein | 1940  | 1845  | 1809  | 1923  | 1110  | 1102  | 1116  | 1029  | 1311  | 1396  | 1383  | 1384  |
| K07002 uncharacterized protein | 881   | 850   | 776   | 798   | 489   | 599   | 554   | 602   | 225   | 210   | 181   | 208   |
| K07003 uncharacterized protein | 7973  | 7894  | 7822  | 8010  | 4085  | 4156  | 3903  | 4126  | 3108  | 2915  | 2845  | 2815  |
| K07004 uncharacterized protein | 3116  | 3113  | 2998  | 3019  | 1747  | 1750  | 1465  | 1767  | 1007  | 910   | 895   | 976   |
| K07005 uncharacterized protein | 496   | 558   | 623   | 615   | 1198  | 1139  | 1204  | 1133  | 1081  | 1011  | 951   | 1003  |
| K07006 uncharacterized protein | 1736  | 1648  | 1607  | 1599  | 867   | 816   | 791   | 871   | 966   | 952   | 941   | 1014  |
| K07013 uncharacterized protein | 8     | 6     | 8     | 9     | 0     | 1     | 2     | 3     | 8     | 10    | 9     | 15    |
| K07014 uncharacterized protein | 3808  | 3593  | 3561  | 3795  | 2189  | 2222  | 2069  | 2202  | 2255  | 2178  | 2194  | 2201  |
| K07015 uncharacterized protein | 297   | 245   | 282   | 277   | 98    | 92    | 109   | 89    | 341   | 350   | 298   | 337   |
| K07017 uncharacterized protein | 1307  | 1334  | 1139  | 1309  | 661   | 674   | 551   | 773   | 951   | 950   | 938   | 1041  |
| K07018 uncharacterized protein | 431   | 445   | 431   | 425   | 255   | 229   | 260   | 243   | 120   | 135   | 141   | 108   |
| K07019 uncharacterized protein | 1958  | 1857  | 1790  | 1844  | 1117  | 1279  | 1191  | 1190  | 1245  | 1237  | 1204  | 1256  |
| K07020 uncharacterized protein | 841   | 737   | 821   | 827   | 460   | 373   | 400   | 456   | 285   | 223   | 225   | 231   |
| K07028 uncharacterized protein | 2353  | 2265  | 2318  | 2368  | 1391  | 1203  | 1312  | 1469  | 782   | 679   | 815   | 764   |
| K07030 uncharacterized protein | 826   | 832   | 819   | 777   | 269   | 287   | 291   | 301   | 722   | 893   | 872   | 835   |
| K07032 uncharacterized protein | 687   | 716   | 677   | 675   | 391   | 401   | 360   | 375   | 267   | 229   | 235   | 227   |
| K07033 uncharacterized protein | 36    | 44    | 38    | 41    | 14    | 14    | 11    | 8     | 69    | 89    | 87    | 74    |
| K07034 uncharacterized protein | 397   | 407   | 371   | 381   | 248   | 284   | 305   | 276   | 555   | 508   | 516   | 541   |
| K07035 uncharacterized protein | 648   | 639   | 657   | 673   | 188   | 197   | 233   | 188   | 686   | 760   | 652   | 718   |
| K07039 uncharacterized protein | 1159  | 1241  | 1135  | 1249  | 736   | 708   | 764   | 776   | 834   | 815   | 827   | 850   |
| K07040 uncharacterized protein | 1315  | 1409  | 1336  | 1428  | 748   | 760   | 738   | 762   | 820   | 960   | 928   | 885   |
| K07041 uncharacterized protein | 2     | 2     | 2     | 1     | 3     | 2     | 0     | 3     | 7     | 8     | 10    | 10    |
| K07044 uncharacterized protein | 1561  | 1647  | 1732  | 1588  | 2274  | 2304  | 2311  | 2288  | 2102  | 2119  | 2124  | 2021  |
| K07044 uncharacterized protein | 3255  | 3246  | 3188  | 3165  | 1827  | 1726  | 1740  | 1865  | 1058  | 1021  | 1020  | 974   |
| K07045 uncharacterized protein | 811   | 759   | 816   | 804   | 196   | 222   | 211   | 175   | 730   | 707   | 698   | 767   |
| K07051 uncharacterized protein | 0     | 0     | 0     | 0     | 0     | 2     | 2     | 0     | 6     | 4     | 3     | 8     |
| K07052 uncharacterized protein | 3292  | 3395  | 3413  | 3393  | 3982  | 4016  | 4095  | 4156  | 3248  | 3091  | 3206  | 3182  |
| K07054 uncharacterized protein | 571   | 534   | 518   | 571   | 358   | 395   | 468   | 485   | 786   | 690   | 720   | 815   |
| K07063 uncharacterized protein | 0     | 1     | 0     | 0     | 0     | 0     | 0     | 0     | 0     | 0     | 1     | 1     |
| K07068 uncharacterized protein | 590   | 639   | 595   | 630   | 321   | 325   | 313   | 321   | 191   | 214   | 156   | 200   |
| K07069 uncharacterized protein | 53    | 45    | 63    | 60    | 17    | 19    | 16    | 20    | 83    | 110   | 105   | 85    |
| K07070 uncharacterized protein | 592   | 622   | 558   | 586   | 370   | 384   | 328   | 369   | 324   | 301   | 284   | 343   |
| K07071 uncharacterized protein | 2763  | 2663  | 2723  | 2707  | 3612  | 3519  | 3570  | 3654  | 3074  | 2946  | 3041  | 2970  |
| K07074 uncharacterized protein | 1896  | 1962  | 1939  | 1911  | 1185  | 1218  | 1062  | 1168  | 660   | 671   | 648   | 705   |
| K07075 uncharacterized protein | 765   | 876   | 869   | 821   | 2671  | 2545  | 2762  | 2725  | 1919  | 1626  | 1912  | 1785  |
| K07076 uncharacterized protein | 1165  | 1103  | 1119  | 1020  | 575   | 537   | 509   | 569   | 344   | 298   | 264   | 332   |
| K07077 uncharacterized protein | 0     | 0     | 2     | 3     | 3     | 2     | 0     | 0     | 1     | 1     | 2     | 11    |
| K07078 uncharacterized protein | 1602  | 1448  | 1606  | 1527  | 2045  | 2188  | 2134  | 2041  | 1433  | 1444  | 1456  | 1351  |
| K07079 uncharacterized protein | 2023  | 2069  | 2022  | 2219  | 3016  | 3101  | 3096  | 2971  | 3658  | 3984  | 3827  | 3840  |
| K07080 uncharacterized protein | 1249  | 1186  | 1150  | 1204  | 878   | 871   | 888   | 890   | 426   | 437   | 372   | 442   |
| K07088 uncharacterized protein | 3769  | 3890  | 3932  | 3869  | 2273  | 2405  | 2225  | 2317  | 2808  | 2804  | 2700  | 2945  |
| K07089 uncharacterized protein | 1765  | 1656  | 1733  | 1728  | 1084  | 1208  | 1173  | 1242  | 1720  | 1742  | 1848  | 1965  |
| K07090 uncharacterized protein | 11714 | 11633 | 11092 | 11548 | 5844  | 5696  | 5631  | 6211  | 5590  | 5571  | 5584  | 5720  |
| K07092 uncharacterized protein | 556   | 521   | 470   | 454   | 272   | 261   | 260   | 309   | 156   | 142   | 149   | 146   |
| K07093 uncharacterized protein | 228   | 234   | 243   | 245   | 114   | 126   | 133   | 131   | 91    | 75    | 62    | 67    |
| K07095 uncharacterized protein | 2032  | 2117  | 1982  | 2062  | 1898  | 1897  | 1826  | 1912  | 2001  | 2113  | 2106  | 1970  |
| K07096 uncharacterized protein | 23    | 19    | 23    | 27    | 4     | 3     | 8     | 3     | 14    | 14    | 4     | 17    |
| K07097 uncharacterized protein | 2     | 0     | 0     | 1     | 0     | 0     | 0     | 0     | 0     | 0     | 0     | 1     |
| K07098 uncharacterized protein | 1825  | 1845  | 1871  | 1834  | 2937  | 2991  | 3085  | 2911  | 2353  | 2319  | 2404  | 2393  |
| K07099 uncharacterized protein | 61    | 83    | 70    | 70    | 69    | 50    | 54    | 43    | 90    | 78    | 82    | 111   |
| K07101 uncharacterized protein | 16    | 12    | 19    | 19    | 38    | 39    | 50    | 39    | 53    | 40    | 31    | 30    |
| K07103 uncharacterized protein | 0     | 0     | 0     | 1     | 0     | 0     | 0     | 0     | 4     | 4     | 0     | 2     |
| K07105 uncharacterized protein | 152   | 148   | 146   | 170   | 63    | 70    | 56    | 51    | 202   | 210   | 179   | 197   |
| K07108 uncharacterized protein | 2     | 0     | 2     | 0     | 1     | 0     | 0     | 2     | 0     | 1     | 3     | 1     |
| K07109 uncharacterized protein | 317   | 330   | 329   | 340   | 234   | 267   | 257   | 253   | 494   | 458   | 505   | 481   |
| K07112 uncharacterized protein | 4577  | 4539  | 4150  | 4447  | 2601  | 2659  | 2574  | 2743  | 2243  | 2249  | 2066  | 2317  |
| K07118 uncharacterized protein | 1423  | 1509  | 1423  | 1444  | 1924  | 1904  | 1883  | 1848  | 1432  | 1330  | 1402  | 1329  |
| K07120 uncharacterized protein | 1933  | 1878  | 1817  | 1858  | 918   | 958   | 841   | 921   | 1199  | 1283  | 1304  | 1268  |
| K07121 uncharacterized protein | 4163  | 4147  | 4027  | 4157  | 2503  | 2481  | 2475  | 2652  | 2498  | 2481  | 2603  | 2626  |
| K07123 uncharacterized protein | 0     | 0     | 0     | 1     | 0     | 0     | 0     | 0     | 2     | 12    | 8     | 12    |
| K07124 uncharacterized protein | 3631  | 3926  | 3571  | 3821  | 2209  | 2298  | 2176  | 2231  | 2013  | 1816  | 1887  | 1992  |
| K07126 uncharacterized protein | 7306  | 7349  | 7465  | 7358  | 6094  | 6059  | 4548  | 4553  | 4966  | 4559  | 4904  | 4715  |
| K07129 uncharacterized protein | 33    | 41    | 30    | 31    | 2     | 0     | 3     | 2     | 46    | 61    | 57    | 60    |
| K07133 uncharacterized protein | 9046  | 9618  | 10346 | 9509  | 25822 | 26048 | 26838 | 26319 | 20872 | 20053 | 21045 | 20721 |
| K07134 uncharacterized protein | 0     | 0     | 2     | 0     | 0     | 3     | 0     | 0     | 1     | 5     | 2     | 8     |
| K07135 uncharacterized protein | 0     | 0     | 0     | 0     | 0     | 0     | 0     | 1     | 0     | 2     | 1     | 5     |
| K07136 uncharacterized protein | 279   | 228   | 215   | 264   | 181   | 179   | 176   | 154   | 365   | 402   | 382   | 380   |
| K07137 uncharacterized protein | 2626  | 2652  | 2631  | 2723  | 3939  | 3854  | 3926  | 3597  | 4038  | 4113  | 4163  | 3974  |
| K07138 uncharacterized protein | 1019  | 945   | 959   | 949   | 607   | 542   | 668   | 615   | 987   | 1018  | 965   | 1073  |
| K07139 uncharacterized protein | 1616  | 1569  | 1622  | 1605  | 2582  | 2610  | 2760  | 2486  | 2677  | 2656  | 2640  | 2715  |
| K0                             |       |       |       |       |       |       |       |       |       |       |       |       |

|                                |      |      |      |      |      |      |      |      |      |      |      |      |
|--------------------------------|------|------|------|------|------|------|------|------|------|------|------|------|
| K07502 uncharacterized protein | 372  | 340  | 354  | 321  | 60   | 80   | 71   | 53   | 287  | 315  | 309  | 304  |
| K07584 uncharacterized protein | 181  | 168  | 166  | 174  | 62   | 57   | 47   | 47   | 161  | 165  | 140  | 146  |
| K07586 uncharacterized protein | 36   | 37   | 32   | 45   | 12   | 14   | 4    | 4    | 39   | 43   | 24   | 24   |
| K07742 uncharacterized protein | 185  | 184  | 185  | 203  | 57   | 73   | 64   | 48   | 141  | 184  | 147  | 167  |
| K07807 uncharacterized protein | 384  | 412  | 469  | 424  | 377  | 319  | 294  | 306  | 99   | 111  | 89   | 117  |
| K08997 uncharacterized protein | 884  | 854  | 797  | 857  | 640  | 647  | 590  | 546  | 1117 | 1178 | 1086 | 1191 |
| K08998 uncharacterized protein | 906  | 886  | 864  | 901  | 995  | 983  | 1002 | 1044 | 1027 | 1058 | 1013 | 1014 |
| K08999 uncharacterized protein | 380  | 358  | 423  | 396  | 1257 | 1338 | 1236 | 1251 | 873  | 864  | 862  | 875  |
| K09003 uncharacterized protein | 2    | 0    | 2    | 3    | 6    | 0    | 0    | 2    | 0    | 8    | 3    | 4    |
| K09004 uncharacterized protein | 70   | 69   | 60   | 53   | 9    | 16   | 9    | 18   | 48   | 62   | 50   | 48   |
| K09005 uncharacterized protein | 3    | 2    | 4    | 1    | 2    | 4    | 0    | 0    | 13   | 2    | 7    | 7    |
| K09009 uncharacterized protein | 2    | 3    | 0    | 1    | 0    | 2    | 1    | 6    | 8    | 2    | 1    | 4    |
| K09116 uncharacterized protein | 61   | 62   | 47   | 58   | 25   | 8    | 13   | 23   | 115  | 158  | 131  | 166  |
| K09117 uncharacterized protein | 934  | 902  | 965  | 935  | 1283 | 1375 | 1451 | 1383 | 1172 | 1264 | 1175 | 1169 |
| K09118 uncharacterized protein | 56   | 86   | 60   | 61   | 60   | 53   | 45   | 49   | 77   | 112  | 108  | 114  |
| K09122 uncharacterized protein | 0    | 0    | 0    | 0    | 0    | 0    | 0    | 0    | 2    | 0    | 0    | 0    |
| K09124 uncharacterized protein | 71   | 98   | 104  | 83   | 310  | 319  | 321  | 287  | 36   | 69   | 49   | 51   |
| K09125 uncharacterized protein | 1815 | 1888 | 1923 | 1901 | 2182 | 2134 | 2151 | 2276 | 1599 | 1607 | 1611 | 1614 |
| K09126 uncharacterized protein | 0    | 0    | 1    | 0    | 3    | 2    | 4    | 4    | 4    | 11   | 3    | 2    |
| K09128 uncharacterized protein | 88   | 98   | 99   | 118  | 39   | 35   | 29   | 38   | 169  | 179  | 169  | 186  |
| K09129 uncharacterized protein | 0    | 0    | 0    | 0    | 0    | 0    | 0    | 0    | 4    | 0    | 0    | 0    |
| K09131 uncharacterized protein | 536  | 560  | 547  | 588  | 336  | 362  | 346  | 347  | 362  | 325  | 294  | 329  |
| K09133 uncharacterized protein | 121  | 157  | 132  | 147  | 62   | 61   | 51   | 72   | 162  | 182  | 153  | 176  |
| K09137 uncharacterized protein | 14   | 8    | 15   | 10   | 0    | 0    | 0    | 0    | 27   | 26   | 35   | 29   |
| K09138 uncharacterized protein | 135  | 128  | 125  | 131  | 28   | 22   | 24   | 20   | 91   | 92   | 83   | 99   |
| K09139 uncharacterized protein | 2    | 0    | 0    | 0    | 3    | 0    | 0    | 0    | 0    | 5    | 2    | 4    |
| K09141 uncharacterized protein | 5    | 6    | 8    | 5    | 5    | 1    | 3    | 2    | 4    | 22   | 18   | 17   |
| K09142 uncharacterized protein | 0    | 0    | 0    | 0    | 0    | 0    | 0    | 0    | 0    | 2    | 4    | 3    |
| K09144 uncharacterized protein | 0    | 0    | 2    | 0    | 0    | 0    | 3    | 2    | 6    | 7    | 2    | 7    |
| K09145 uncharacterized protein | 23   | 41   | 31   | 35   | 3    | 4    | 3    | 10   | 82   | 68   | 66   | 80   |
| K09154 uncharacterized protein | 0    | 0    | 0    | 0    | 0    | 0    | 0    | 0    | 3    | 7    | 3    | 4    |
| K09155 uncharacterized protein | 155  | 172  | 145  | 159  | 108  | 109  | 114  | 112  | 61   | 93   | 74   | 81   |
| K09157 uncharacterized protein | 848  | 881  | 860  | 874  | 378  | 419  | 388  | 397  | 956  | 1033 | 994  | 992  |
| K09158 uncharacterized protein | 576  | 582  | 600  | 610  | 372  | 376  | 343  | 408  | 336  | 428  | 373  | 379  |
| K09160 uncharacterized protein | 1005 | 938  | 925  | 1004 | 572  | 587  | 558  | 512  | 655  | 609  | 565  | 657  |
| K09161 uncharacterized protein | 309  | 269  | 287  | 313  | 176  | 227  | 233  | 183  | 415  | 461  | 416  | 466  |
| K09163 uncharacterized protein | 48   | 44   | 42   | 54   | 7    | 9    | 11   | 17   | 75   | 89   | 83   | 116  |
| K09164 uncharacterized protein | 2    | 2    | 2    | 0    | 0    | 2    | 0    | 0    | 0    | 1    | 0    | 1    |
| K09167 uncharacterized protein | 2    | 6    | 2    | 7    | 3    | 2    | 4    | 6    | 13   | 14   | 4    | 12   |
| K09190 uncharacterized protein | 0    | 0    | 0    | 0    | 0    | 0    | 0    | 2    | 0    | 0    | 0    | 0    |
| K09384 uncharacterized protein | 43   | 40   | 40   | 47   | 22   | 13   | 17   | 10   | 60   | 89   | 77   | 109  |
| K09386 uncharacterized protein | 0    | 0    | 0    | 0    | 0    | 0    | 0    | 2    | 3    | 0    | 0    | 6    |
| K09701 uncharacterized protein | 467  | 424  | 431  | 464  | 284  | 308  | 287  | 330  | 577  | 602  | 578  | 603  |
| K09702 uncharacterized protein | 307  | 333  | 324  | 316  | 294  | 285  | 252  | 338  | 348  | 402  | 343  | 418  |
| K09703 uncharacterized protein | 197  | 175  | 219  | 204  | 35   | 32   | 41   | 28   | 225  | 275  | 257  | 257  |
| K09704 uncharacterized protein | 3013 | 3094 | 3329 | 3077 | 9166 | 9174 | 9448 | 8972 | 8143 | 7748 | 7916 | 7290 |
| K09705 uncharacterized protein | 115  | 139  | 104  | 136  | 30   | 31   | 28   | 22   | 88   | 99   | 82   | 96   |
| K09706 uncharacterized protein | 1    | 3    | 0    | 1    | 0    | 3    | 0    | 0    | 1    | 0    | 6    | 4    |
| K09707 uncharacterized protein | 202  | 188  | 152  | 175  | 37   | 18   | 20   | 24   | 200  | 192  | 174  | 179  |
| K09711 uncharacterized protein | 1    | 0    | 1    | 1    | 0    | 1    | 0    | 1    | 0    | 0    | 2    | 7    |
| K09712 uncharacterized protein | 137  | 143  | 125  | 135  | 74   | 73   | 54   | 84   | 189  | 221  | 216  | 193  |
| K09713 uncharacterized protein | 0    | 0    | 0    | 0    | 0    | 0    | 0    | 0    | 2    | 0    | 0    | 12   |
| K09717 uncharacterized protein | 0    | 4    | 0    | 0    | 0    | 3    | 2    | 0    | 8    | 7    | 2    | 3    |
| K09721 uncharacterized protein | 0    | 0    | 0    | 1    | 0    | 0    | 0    | 0    | 0    | 2    | 0    | 1    |
| K09724 uncharacterized protein | 0    | 2    | 0    | 2    | 2    | 4    | 2    | 2    | 5    | 13   | 4    | 11   |
| K09726 uncharacterized protein | 0    | 0    | 0    | 0    | 0    | 0    | 0    | 0    | 5    | 1    | 6    | 12   |
| K09727 uncharacterized protein | 0    | 2    | 2    | 0    | 0    | 0    | 0    | 0    | 1    | 0    | 0    | 4    |
| K09728 uncharacterized protein | 0    | 0    | 0    | 0    | 0    | 1    | 0    | 0    | 0    | 0    | 0    | 0    |
| K09729 uncharacterized protein | 26   | 44   | 37   | 39   | 3    | 2    | 7    | 2    | 54   | 51   | 48   | 58   |
| K09730 uncharacterized protein | 0    | 0    | 0    | 0    | 0    | 0    | 5    | 0    | 1    | 5    | 2    | 3    |
| K09735 uncharacterized protein | 0    | 0    | 0    | 0    | 1    | 0    | 2    | 0    | 2    | 5    | 2    | 5    |
| K09737 uncharacterized protein | 0    | 0    | 0    | 0    | 0    | 0    | 0    | 0    | 1    | 0    | 0    | 0    |
| K09738 uncharacterized protein | 0    | 0    | 2    | 0    | 0    | 0    | 0    | 0    | 0    | 2    | 0    | 3    |
| K09740 uncharacterized protein | 9    | 4    | 16   | 13   | 15   | 13   | 19   | 10   | 17   | 32   | 31   | 22   |
| K09747 uncharacterized protein | 942  | 918  | 882  | 931  | 489  | 512  | 416  | 510  | 757  | 751  | 778  | 745  |
| K09749 uncharacterized protein | 345  | 347  | 379  | 372  | 84   | 113  | 115  | 78   | 308  | 340  | 361  | 391  |
| K09762 uncharacterized protein | 622  | 526  | 564  | 502  | 160  | 165  | 203  | 166  | 432  | 599  | 576  | 482  |
| K09763 uncharacterized protein | 0    | 0    | 0    | 0    | 0    | 0    | 0    | 1    | 0    | 0    | 0    | 0    |
| K09764 uncharacterized protein | 10   | 14   | 12   | 10   | 13   | 18   | 19   | 18   | 18   | 24   | 24   | 28   |
| K09766 uncharacterized protein | 1    | 2    | 0    | 1    | 0    | 0    | 0    | 0    | 0    | 1    | 2    | 2    |
| K09768 uncharacterized protein | 1317 | 1268 | 1344 | 1296 | 691  | 733  | 690  | 775  | 904  | 858  | 912  | 953  |
| K09769 uncharacterized protein | 126  | 89   | 92   | 98   | 57   | 90   | 76   | 72   | 90   | 122  | 78   | 132  |
| K09770 uncharacterized protein | 0    | 0    | 0    | 3    | 0    | 0    | 0    | 0    | 2    | 0    | 0    | 2    |
| K09775 uncharacterized protein | 261  | 192  | 216  | 257  | 58   | 64   | 73   | 81   | 182  | 170  | 192  | 183  |
| K09776 uncharacterized protein | 0    | 0    | 0    | 0    | 0    | 0    | 0    | 0    | 0    | 0    | 2    | 0    |
| K09777 uncharacterized protein | 39   | 37   | 51   | 37   | 24   | 28   | 40   | 18   | 53   | 64   | 69   | 66   |
| K09779 uncharacterized protein | 139  | 122  | 164  | 145  | 90   | 49   | 45   | 37   | 122  | 123  | 145  | 176  |
| K09780 uncharacterized protein | 631  | 614  | 571  | 598  | 295  | 355  | 363  | 387  | 384  | 339  | 405  | 425  |
| K09781 uncharacterized protein | 1105 | 1072 | 1012 | 1048 | 635  | 656  | 634  | 698  | 834  | 829  | 725  | 765  |
| K09786 uncharacterized protein | 2519 | 2526 | 2440 | 2578 | 1503 | 1506 | 1463 | 1563 | 1569 | 1587 | 1621 | 1609 |
| K09787 uncharacterized protein | 186  | 191  | 224  | 201  | 60   | 70   | 57   | 63   | 163  | 183  | 177  | 203  |
| K09790 uncharacterized protein | 1022 | 1001 | 998  | 918  | 1124 | 1167 | 1180 | 1119 | 1085 | 978  | 1049 | 986  |
| K09791 uncharacterized protein | 368  | 403  | 335  | 329  | 261  | 211  | 183  | 214  | 269  | 287  | 251  | 224  |
| K09792 uncharacterized protein | 326  | 334  | 315  | 312  | 146  | 184  | 84   | 101  | 97   | 83   | 92   | 82   |
| K09793 uncharacterized protein | 230  | 224  | 217  | 243  | 656  | 627  | 935  | 885  | 576  | 431  | 571  | 514  |
| K09794 uncharacterized protein | 380  | 347  | 323  | 351  | 213  | 178  | 183  | 188  | 116  | 103  | 94   | 126  |
| K09795 uncharacterized protein | 2    | 1    | 2    | 0    | 2    | 2    | 3    | 1    | 1    | 0    | 3    | 2    |
| K09797 uncharacterized protein | 206  | 227  | 219  | 249  | 144  | 128  | 149  | 163  | 227  | 256  | 246  | 233  |
| K09798 uncharacterized protein | 1872 | 1868 | 1783 | 1786 | 1085 | 1143 | 1053 | 1087 | 1306 | 1269 | 1162 | 1250 |
| K09799 uncharacterized protein | 0    | 0    | 0    | 0    | 0    | 5    | 0    | 2    | 2    | 2    | 6    | 5    |
| K09801 uncharacterized protein | 678  | 575  | 588  | 586  | 401  | 364  | 414  | 411  | 314  | 328  | 315  | 352  |
| K09802 uncharacterized protein | 232  | 200  | 184  | 213  | 158  | 147  | 155  | 173  | 251  | 301  | 232  | 235  |
| K09803 uncharacterized protein | 28   | 33   | 21   | 31   | 5    | 4    | 3    | 10   | 7    | 12   | 26   | 15   |
| K09804 uncharacterized protein | 3    | 0    | 0    | 0    | 0    | 0    | 0    | 0    | 0    | 0    | 0    | 0    |
| K09805 uncharacterized protein | 8    | 14   | 9    | 9    | 12   | 5    | 8    | 4    | 33   | 48   | 26   | 34   |
| K09806 uncharacterized protein | 729  | 653  | 692  | 692  | 424  | 419  | 468  | 444  | 452  | 403  | 399  | 391  |
| K09807 uncharacterized protein | 1120 | 990  | 1052 | 1081 | 1796 | 1725 | 1784 | 1732 | 1815 | 1814 | 1759 | 1776 |
| K09824 uncharacterized protein | 671  | 693  | 719  | 755  | 660  | 634  | 628  | 628  | 763  | 817  | 739  | 864  |
| K09857 uncharacterized protein | 1608 | 1568 | 1444 | 1529 | 922  | 891  | 868  | 904  | 790  | 799  | 851  | 886  |
| K09861 uncharacterized protein | 2472 | 2540 | 2529 | 2480 | 2935 | 2941 | 2906 | 2865 | 2681 | 2641 | 2838 | 2772 |
| K09862 uncharacterized protein | 441  | 414  | 444  | 421  | 269  | 310  | 298  | 271  | 223  | 278  | 267  | 264  |
| K09891 uncharacterized protein | 379  | 340  | 375  | 389  | 263  | 291  | 273  | 233  | 537  | 506  | 522  | 499  |
| K09894 uncharacterized protein | 218  | 231  | 248  | 270  | 197  | 209  | 136  | 138  | 343  | 350  | 322  | 369  |
| K09895 uncharacterized protein | 508  | 540  | 517  | 538  | 329  | 397  | 337  | 331  | 483  | 606  | 539  | 608  |
| K09896 uncharacterized protein | 151  | 182  | 206  | 185  | 139  | 149  | 178  | 110  | 254  | 248  | 236  | 257  |
| K09897 uncharacterized protein | 282  | 230  | 238  | 274  | 183  | 216  | 187  | 164  | 313  | 338  | 325  | 355  |
| K09898 uncharacterized protein | 523  | 507  | 451  | 518  | 285  | 299  | 260  | 286  | 302  | 310  | 296  | 302  |
| K09899 uncharacterized protein | 235  | 211  | 202  | 248  | 175  | 177  | 183  | 177  | 323  | 415  | 373  | 392  |
| K09900 uncharacterized protein | 169  | 177  | 166  | 181  | 127  | 136  | 155  | 144  | 278  | 245  | 209  | 281  |
| K09901 uncharacterized protein | 172  | 186  | 160  | 191  | 105  | 135  | 115  | 129  | 274  | 250  | 198  | 204  |
| K09902 uncharacterized protein | 569  | 598  | 571  | 601  | 322  | 341  | 343  | 358  | 375  | 379  | 363  | 415  |
| K09904 uncharacterized protein | 180  | 185  | 152  | 195  | 120  | 121  | 115  | 102  | 269  | 291  | 267  | 270  |
| K09907 uncharacterized protein | 328  | 332  | 361  | 334  | 213  | 272  | 249  | 207  | 453  | 453  | 500  | 468  |
| K09908 uncharacterized protein | 1013 | 977  | 938  | 894  | 548  | 595  | 565  | 570  | 694  | 636  | 561  | 590  |
| K09909 uncharacterized protein | 133  | 145  | 136  | 134  | 197  | 231  | 231  | 187  | 18   | 37   | 40   | 27   |
| K09910 uncharacterized protein | 210  | 192  | 207  | 238  | 192  | 168  | 189  | 181  | 286  | 334  | 337  | 334  |
| K09911 uncharacterized protein | 242  | 238  | 247  | 276  | 198  | 192  | 158  | 140  | 322  | 325  | 371  | 351  |
| K09912 uncharacterized protein |      |      |      |      |      |      |      |      |      |      |      |      |

|                                |      |      |      |      |       |       |       |       |      |      |      |      |
|--------------------------------|------|------|------|------|-------|-------|-------|-------|------|------|------|------|
| K09918 uncharacterized protein | 425  | 413  | 434  | 368  | 289   | 254   | 289   | 322   | 158  | 147  | 129  | 123  |
| K09919 uncharacterized protein | 1789 | 1696 | 1686 | 1757 | 963   | 929   | 923   | 949   | 553  | 504  | 513  | 554  |
| K09920 uncharacterized protein | 973  | 972  | 959  | 931  | 582   | 621   | 591   | 635   | 708  | 638  | 605  | 635  |
| K09921 uncharacterized protein | 1384 | 1332 | 1248 | 1366 | 796   | 822   | 827   | 856   | 970  | 927  | 828  | 944  |
| K09922 uncharacterized protein | 645  | 738  | 777  | 699  | 1003  | 957   | 1044  | 1010  | 662  | 746  | 577  | 602  |
| K09923 uncharacterized protein | 709  | 686  | 725  | 731  | 462   | 449   | 358   | 348   | 451  | 472  | 485  | 465  |
| K09924 uncharacterized protein | 875  | 887  | 772  | 793  | 515   | 498   | 448   | 500   | 302  | 263  | 263  | 278  |
| K09925 uncharacterized protein | 859  | 844  | 904  | 835  | 462   | 460   | 429   | 454   | 353  | 328  | 320  | 322  |
| K09926 uncharacterized protein | 744  | 733  | 715  | 704  | 417   | 368   | 384   | 442   | 229  | 213  | 235  | 227  |
| K09927 uncharacterized protein | 3202 | 3095 | 3065 | 3110 | 1426  | 1498  | 1397  | 1434  | 2130 | 2158 | 2226 | 2147 |
| K09928 uncharacterized protein | 396  | 431  | 414  | 441  | 211   | 256   | 209   | 219   | 100  | 119  | 119  | 136  |
| K09929 uncharacterized protein | 760  | 814  | 772  | 744  | 397   | 411   | 328   | 375   | 273  | 219  | 242  | 224  |
| K09930 uncharacterized protein | 1300 | 1410 | 1432 | 1323 | 795   | 784   | 686   | 659   | 385  | 347  | 443  | 426  |
| K09931 uncharacterized protein | 849  | 785  | 718  | 708  | 404   | 367   | 327   | 390   | 264  | 274  | 232  | 211  |
| K09932 uncharacterized protein | 834  | 803  | 766  | 750  | 374   | 417   | 331   | 414   | 597  | 598  | 595  | 620  |
| K09934 uncharacterized protein | 861  | 878  | 892  | 846  | 537   | 497   | 506   | 541   | 374  | 270  | 316  | 301  |
| K09935 uncharacterized protein | 1114 | 1059 | 1050 | 1074 | 588   | 527   | 535   | 573   | 498  | 517  | 462  | 503  |
| K09937 uncharacterized protein | 503  | 543  | 509  | 510  | 306   | 292   | 278   | 268   | 289  | 336  | 352  | 367  |
| K09938 uncharacterized protein | 1629 | 1615 | 1522 | 1608 | 910   | 801   | 824   | 912   | 546  | 466  | 521  | 476  |
| K09939 uncharacterized protein | 58   | 68   | 79   | 67   | 97    | 107   | 87    | 98    | 2    | 19   | 9    | 12   |
| K09940 uncharacterized protein | 669  | 672  | 724  | 733  | 351   | 358   | 348   | 406   | 217  | 224  | 201  | 206  |
| K09945 uncharacterized protein | 1104 | 1051 | 1073 | 1092 | 603   | 640   | 721   | 850   | 704  | 662  | 585  | 664  |
| K09946 uncharacterized protein | 620  | 583  | 575  | 641  | 351   | 310   | 348   | 367   | 249  | 192  | 203  | 249  |
| K09947 uncharacterized protein | 491  | 459  | 492  | 477  | 280   | 304   | 266   | 268   | 124  | 132  | 138  | 148  |
| K09948 uncharacterized protein | 477  | 448  | 377  | 429  | 195   | 232   | 240   | 238   | 168  | 116  | 122  | 140  |
| K09949 uncharacterized protein | 36   | 26   | 45   | 47   | 4     | 11    | 3     | 4     | 41   | 59   | 49   | 58   |
| K09950 uncharacterized protein | 1764 | 1737 | 1569 | 1729 | 905   | 885   | 928   | 970   | 601  | 564  | 452  | 548  |
| K09954 uncharacterized protein | 491  | 489  | 459  | 488  | 270   | 312   | 263   | 284   | 315  | 340  | 299  | 308  |
| K09955 uncharacterized protein | 7153 | 7561 | 7758 | 7547 | 12477 | 12339 | 12973 | 12959 | 9589 | 9705 | 9638 | 9490 |
| K09956 uncharacterized protein | 517  | 510  | 443  | 411  | 257   | 268   | 215   | 266   | 154  | 153  | 151  | 154  |
| K09957 uncharacterized protein | 491  | 459  | 510  | 471  | 269   | 239   | 230   | 285   | 149  | 155  | 145  | 142  |
| K09958 uncharacterized protein | 1139 | 1158 | 1030 | 1081 | 638   | 734   | 580   | 648   | 650  | 631  | 628  | 648  |
| K09959 uncharacterized protein | 0    | 3    | 0    | 3    | 0     | 0     | 2     | 0     | 2    | 0    | 0    | 0    |
| K09960 uncharacterized protein | 227  | 212  | 238  | 249  | 16    | 19    | 12    | 14    | 13   | 9    | 18   | 15   |
| K09961 uncharacterized protein | 941  | 1003 | 1069 | 970  | 278   | 300   | 260   | 273   | 39   | 41   | 40   | 34   |
| K09962 uncharacterized protein | 889  | 878  | 823  | 841  | 475   | 477   | 467   | 487   | 274  | 255  | 207  | 246  |
| K09963 uncharacterized protein | 550  | 616  | 605  | 537  | 104   | 114   | 128   | 115   | 452  | 496  | 509  | 449  |
| K09964 uncharacterized protein | 861  | 784  | 766  | 788  | 1062  | 1038  | 1031  | 1077  | 743  | 670  | 728  | 638  |
| K09965 uncharacterized protein | 807  | 765  | 655  | 733  | 466   | 381   | 354   | 382   | 196  | 213  | 220  | 248  |
| K09967 uncharacterized protein | 474  | 452  | 393  | 450  | 605   | 671   | 570   | 596   | 36   | 38   | 48   | 38   |
| K09968 uncharacterized protein | 210  | 198  | 203  | 217  | 89    | 89    | 68    | 78    | 670  | 581  | 568  | 646  |
| K09973 uncharacterized protein | 946  | 866  | 954  | 952  | 2136  | 2029  | 2159  | 1976  | 2037 | 1924 | 1894 | 2021 |
| K09974 uncharacterized protein | 865  | 839  | 734  | 730  | 392   | 428   | 366   | 480   | 240  | 302  | 273  | 273  |
| K09975 uncharacterized protein | 1502 | 1534 | 1409 | 1644 | 944   | 1054  | 936   | 986   | 785  | 816  | 757  | 767  |
| K09976 uncharacterized protein | 16   | 12   | 10   | 5    | 2     | 4     | 3     | 3     | 6    | 7    | 6    | 11   |
| K09977 uncharacterized protein | 528  | 461  | 427  | 477  | 252   | 279   | 209   | 264   | 174  | 138  | 130  | 161  |
| K09978 uncharacterized protein | 685  | 597  | 645  | 647  | 370   | 322   | 314   | 348   | 442  | 484  | 443  | 426  |
| K09979 uncharacterized protein | 279  | 258  | 282  | 285  | 198   | 208   | 201   | 218   | 347  | 402  | 374  | 377  |
| K09980 uncharacterized protein | 980  | 997  | 1013 | 1053 | 629   | 518   | 517   | 599   | 341  | 364  | 377  | 313  |
| K09982 uncharacterized protein | 251  | 287  | 264  | 322  | 180   | 201   | 179   | 186   | 227  | 255  | 223  | 280  |
| K09983 uncharacterized protein | 610  | 623  | 570  | 605  | 342   | 330   | 303   | 351   | 223  | 183  | 176  | 182  |
| K09984 uncharacterized protein | 525  | 489  | 442  | 542  | 295   | 253   | 277   | 339   | 245  | 289  | 267  | 278  |
| K09985 uncharacterized protein | 0    | 0    | 0    | 0    | 2     | 2     | 0     | 2     | 0    | 0    | 2    | 2    |
| K09986 uncharacterized protein | 918  | 917  | 866  | 907  | 477   | 464   | 502   | 446   | 323  | 276  | 265  | 263  |
| K09987 uncharacterized protein | 0    | 0    | 0    | 0    | 2     | 0     | 0     | 0     | 0    | 0    | 5    | 0    |
| K09989 uncharacterized protein | 1626 | 1675 | 1607 | 1613 | 918   | 870   | 887   | 977   | 604  | 505  | 538  | 492  |
| K09990 uncharacterized protein | 2    | 0    | 0    | 1    | 0     | 0     | 0     | 0     | 3    | 0    | 3    | 0    |
| K09991 uncharacterized protein | 1    | 0    | 0    | 1    | 1     | 0     | 0     | 0     | 2    | 0    | 2    | 3    |
| K09992 uncharacterized protein | 76   | 84   | 65   | 69   | 11    | 19    | 27    | 27    | 147  | 180  | 130  | 120  |
